# Supplementary material for: Species and population specific gene expression in blood transcriptomes of marine turtles
Source: BMC Genomics. 2021 May 13;22:346. doi: 10.1186/s12864-021-07656-5 (PMC8117300; doi:10.1186/s12864-021-07656-5)
Supplement: Supplementary file 1 — Additional file 1: Table S1. Sample metadata. Detailed metadata, raw read count, and the percent of reads that map to green (Chelonia mydas) turtle hemoglobin genes for each individual (n = 43) included in this study. Individuals without straight carapace length (SCL) denoted were not measured for these parameters. [file 12864_2021_7656_MOESM1_ESM.xlsx]

## Sheet: Sheet1
Sample ID	Turtle ID	Species	Sampling Location	Collection Year	Collection permit number	Straight Carapace Length	Raw Read Count	Percent Reads Mapping to Hemoglobin
Sample_01	48584F307B	Chelonia mydas	Hawaiian Islands, USA	2012	NMFS permit #1581-01	80.3	35486324	0.0243
Sample_02	424F236C1F	Chelonia mydas	Hawaiian Islands, USA	2013	NMFS permit #15685	65	39554292	0.087
Sample_03	43591E2F28	Chelonia mydas	Hawaiian Islands, USA	2013	NMFS permit #15685	77.4	33716455	0.0701
Sample_04	48584C484A	Chelonia mydas	Hawaiian Islands, USA	2013	NMFS permit #15685	84.9	34008849	0.0654
Sample_06	MC426	Dermochelys coriacea	California, USA	2013	NMFS permit #15634		27814976	0.0263
Sample_07	MC434	Dermochelys coriacea	California, USA	2016	NMFS permit #15634		37847072	0.028
Sample_08	MC448	Dermochelys coriacea	California, USA	2013	NMFS permit #15634		36549138	0.0257
Sample_09	4B1A5D2744	Chelonia mydas	Hawaiian Islands, USA	2012	NMFS permit #1581-01	69.7	39097378	0.0638
Sample_10	Turtle 13	Chelonia mydas	California, USA	2015	NMFS permit #15685	44.4	35794551	0.0583
Sample_11	Turtle 14	Chelonia mydas	California, USA	2015	NMFS permit #15685	52.6	26208323	0.0469
Sample_12	MC446	Dermochelys coriacea	California, USA	2013	NMFS permit #15634		27664610	0.0247
Sample_13	Turtle 20	Chelonia mydas	California, USA	2015	NMFS permit #15685	55.8	31387953	0.0376
Sample_14	Turtle 3	Chelonia mydas	California, USA	2015	NMFS permit #15685	61	26272229	0.0487
Sample_15	Turtle 2	Chelonia mydas	California, USA	2015	NMFS permit #15685	67.5	29728647	0.0573
Sample_16	4A2D17264C	Chelonia mydas	Hawaiian Islands, USA	2012	NMFS permit #15685	42.9	21500644	0.0752
Sample_17	Turtle 11	Chelonia mydas	California, USA	2015	NMFS permit #15685	69.5	30268185	0.045
Sample_18	443A197133	Chelonia mydas	Hawaiian Islands, USA	2012	NMFS permit #15685	53.1	20351440	0.0617
Sample_19	Turtle 4	Chelonia mydas	California, USA	2015	NMFS permit #15685	44.6	34809617	0.0336
Sample_20	470C676D20	Chelonia mydas	Hawaiian Islands, USA	2012	NMFS permit #15685	47.4	34534230	0.0837
Sample_21	Turtle 21	Chelonia mydas	California, USA	2015	NMFS permit #15685	62.5	31993956	0.042
Sample_22	152307792A	Caretta caretta	California, USA	2015	NMFS permit #1591		27664060	0.0738
Sample_23	GK17/132269750A	Chelonia mydas	California, USA	2014	NMFS permit #1591		34914005	0.059
Sample_24	RI08694	Chelonia mydas	Mariana Islands, CNMI	2013	NMFS permit #1566-01	56.5	32838778	0.0584
Sample_25	GK27/132125590A	Chelonia mydas	California, USA	2014	NMFS permit #1591		34690720	0.0818
Sample_26	RI08683	Chelonia mydas	Mariana Islands, CNMI	2013	NMFS permit #1566-01	63.7	32528480	0.0677
Sample_27	RI08622	Chelonia mydas	Mariana Islands, CNMI	2013	NMFS permit #1566-01	52.1	37626910	0.0818
Sample_28	GK26/151549022A	Chelonia mydas	California, USA	2014	NMFS permit #1591		36984102	0.0633
Sample_29	RI08620	Chelonia mydas	Mariana Islands, CNMI	2013	NMFS permit #1566-01	46.8	32422875	0.0702
Sample_30	GK3/151958783A	Chelonia mydas	California, USA	2013	NMFS permit #1591	51.9	38006940	0.0279
Sample_31	GK18/151542494A	Chelonia mydas	California, USA	2014	NMFS permit #1591		38274424	0.0599
Sample_32	GK34/152305620A	Chelonia mydas	California, USA	2015	NMFS permit #1591		39487540	0.0351
Sample_33	132159796A/GK15	Chelonia mydas	California, USA	2014	NMFS permit #1591		30916937	0.1361
Sample_34	Turtle 9	Chelonia mydas	California, USA	2015	NMFS permit #15685	84.4	34441626	0.0493
Sample_35	RI08690	Eretmochelys imbricata	Mariana Islands, CNMI	2013	NMFS permit #1566-01	44.5	28536524	0.0724
Sample_36	R31028	Chelonia mydas	Mariana Islands, CNMI	2013	NMFS permit #1566-01	53.7	35686153	0.0684
Sample_37	RI08614	Chelonia mydas	Mariana Islands, CNMI	2013	NMFS permit #1566-01	47.7	19673703	0.0309
Sample_38	Turtle 5	Chelonia mydas	California, USA	2015	NMFS permit #15685	65.1	31670156	0.0703
Sample_39	HE	Eretmochelys imbricata	Palmyra Atoll, US territory	2013	NMFS permit #10027-05	55.5	33060319	0.0435
Sample_40	RI08623	Chelonia mydas	Mariana Islands, CNMI	2013	NMFS permit #1566-01	71.6	28402703	0.0547
Sample_41	RI08591	Chelonia mydas	Mariana Islands, CNMI	2013	NMFS permit #1566-01	85.6	30441431	0.0456
Sample_42	131956440A/MC443	Dermochelys coriacea	California, USA	2016	NMFS permit #15634		39134683	0.0332
Sample_43	Turtle 10	Chelonia mydas	California, USA	2015	NMFS permit #15685	62.3	40015194	0.0715
Sample_44	LB078	Dermochelys coriacea	California, USA	2012	NMFS permit #15634		35365515	0.0275
