# Supplementary material for: Species and population specific gene expression in blood transcriptomes of marine turtles
Source: BMC Genomics. 2021 May 13;22:346. doi: 10.1186/s12864-021-07656-5 (PMC8117300; doi:10.1186/s12864-021-07656-5)
Supplement: Supplementary file 3 — Additional file 3: Table S3. KEGG pathway analyses results. KEGG pathways for the green turtle transcriptome and the leatherback multi-tissue assembly. [file 12864_2021_7656_MOESM3_ESM.xlsx]

## Sheet: kegg_chmy_blood_byseq
Seq	Pathway	Pathway ID	#Enzs in Pathway	Enzyme
TRINITY_DN72524_c0_g1_i1	alpha-Linolenic acid metabolism, Biosynthesis of unsaturated fatty acids, Propanoate metabolism, Fatty acid degradation, beta-Alanine metabolism	map00592, map01040, map00640, map00071, map00410	6, 9, 21, 13, 12	ec:1.3.3.6 - oxidase, ec:2.3.1.16 - C-acyltransferase, ec:3.1.1.32 - A1, ec:1.1.1.1 - dehydrogenase, ec:4.2.1.17 - hydratase, ec:3.1.1.4 - A2, ec:2.3.1.199 - 3-oxoacyl-CoA synthase, ec:1.14.19.1 - 9-desaturase, ec:1.1.1.330 - 3-oxoacyl-CoA reductase, ec:1.3.1.93 - enoyl-CoA reductase, ec:1.3.3.6 - oxidase, ec:4.2.1.134 - (3R)-3-hydroxyacyl-CoA dehydratase, ec:2.3.1.16 - C-acyltransferase, ec:2.3.…
TRINITY_DN12113_c0_g1_i1	Purine metabolism, Thiamine metabolism	map00230, map00730	54, 7	ec:3.6.1.15 - phosphatase, ec:4.6.1.2 - cyclase, ec:3.1.4.35 - phosphodiesterase, ec:3.5.4.10 - cyclohydrolase, ec:3.1.5.1 - deoxy-GTPase, ec:3.6.1.9 - diphosphatase, ec:3.5.4.3 - deaminase, ec:3.6.1.17 - (asymmetrical), ec:1.17.4.1 - reductase, ec:3.6.1.3 - adenylpyrophosphatase, ec:3.1.4.17 - phosphodiesterase, ec:4.3.2.2 - lyase, ec:1.7.1.7 - reductase, ec:1.17.1.4 - dehydrogenase, ec:2.7.7.4 …
TRINITY_DN12113_c0_g1_i2	Purine metabolism, Thiamine metabolism	map00230, map00730	54, 7	ec:3.6.1.15 - phosphatase, ec:4.6.1.2 - cyclase, ec:3.1.4.35 - phosphodiesterase, ec:3.5.4.10 - cyclohydrolase, ec:3.1.5.1 - deoxy-GTPase, ec:3.6.1.9 - diphosphatase, ec:3.5.4.3 - deaminase, ec:3.6.1.17 - (asymmetrical), ec:1.17.4.1 - reductase, ec:3.6.1.3 - adenylpyrophosphatase, ec:3.1.4.17 - phosphodiesterase, ec:4.3.2.2 - lyase, ec:1.7.1.7 - reductase, ec:1.17.1.4 - dehydrogenase, ec:2.7.7.4 …
TRINITY_DN12113_c0_g1_i7	Purine metabolism, Thiamine metabolism	map00230, map00730	54, 7	ec:3.6.1.15 - phosphatase, ec:4.6.1.2 - cyclase, ec:3.1.4.35 - phosphodiesterase, ec:3.5.4.10 - cyclohydrolase, ec:3.1.5.1 - deoxy-GTPase, ec:3.6.1.9 - diphosphatase, ec:3.5.4.3 - deaminase, ec:3.6.1.17 - (asymmetrical), ec:1.17.4.1 - reductase, ec:3.6.1.3 - adenylpyrophosphatase, ec:3.1.4.17 - phosphodiesterase, ec:4.3.2.2 - lyase, ec:1.7.1.7 - reductase, ec:1.17.1.4 - dehydrogenase, ec:2.7.7.4 …
TRINITY_DN12113_c0_g1_i8	Purine metabolism, Thiamine metabolism	map00230, map00730	54, 7	ec:3.6.1.15 - phosphatase, ec:4.6.1.2 - cyclase, ec:3.1.4.35 - phosphodiesterase, ec:3.5.4.10 - cyclohydrolase, ec:3.1.5.1 - deoxy-GTPase, ec:3.6.1.9 - diphosphatase, ec:3.5.4.3 - deaminase, ec:3.6.1.17 - (asymmetrical), ec:1.17.4.1 - reductase, ec:3.6.1.3 - adenylpyrophosphatase, ec:3.1.4.17 - phosphodiesterase, ec:4.3.2.2 - lyase, ec:1.7.1.7 - reductase, ec:1.17.1.4 - dehydrogenase, ec:2.7.7.4 …
TRINITY_DN6452_c0_g2_i3	Oxidative phosphorylation	map00190	5	ec:3.6.1.1 - diphosphatase, ec:1.3.5.1 - dehydrogenase, ec:7.1.2.1 - H+-exporting transporter, ec:1.6.99.3 - dehydrogenase, ec:7.1.1.2 - reductase (H+-translocating)
TRINITY_DN6452_c0_g2_i1	Oxidative phosphorylation	map00190	5	ec:3.6.1.1 - diphosphatase, ec:1.3.5.1 - dehydrogenase, ec:7.1.2.1 - H+-exporting transporter, ec:1.6.99.3 - dehydrogenase, ec:7.1.1.2 - reductase (H+-translocating)
TRINITY_DN37224_c0_g1_i1	Purine metabolism, Thiamine metabolism	map00230, map00730	54, 7	ec:3.6.1.15 - phosphatase, ec:4.6.1.2 - cyclase, ec:3.1.4.35 - phosphodiesterase, ec:3.5.4.10 - cyclohydrolase, ec:3.1.5.1 - deoxy-GTPase, ec:3.6.1.9 - diphosphatase, ec:3.5.4.3 - deaminase, ec:3.6.1.17 - (asymmetrical), ec:1.17.4.1 - reductase, ec:3.6.1.3 - adenylpyrophosphatase, ec:3.1.4.17 - phosphodiesterase, ec:4.3.2.2 - lyase, ec:1.7.1.7 - reductase, ec:1.17.1.4 - dehydrogenase, ec:2.7.7.4 …
TRINITY_DN17924_c0_g1_i9	Purine metabolism, Thiamine metabolism	map00230, map00730	54, 7	ec:3.6.1.15 - phosphatase, ec:4.6.1.2 - cyclase, ec:3.1.4.35 - phosphodiesterase, ec:3.5.4.10 - cyclohydrolase, ec:3.1.5.1 - deoxy-GTPase, ec:3.6.1.9 - diphosphatase, ec:3.5.4.3 - deaminase, ec:3.6.1.17 - (asymmetrical), ec:1.17.4.1 - reductase, ec:3.6.1.3 - adenylpyrophosphatase, ec:3.1.4.17 - phosphodiesterase, ec:4.3.2.2 - lyase, ec:1.7.1.7 - reductase, ec:1.17.1.4 - dehydrogenase, ec:2.7.7.4 …
TRINITY_DN17924_c0_g1_i3	Purine metabolism, Thiamine metabolism	map00230, map00730	54, 7	ec:3.6.1.15 - phosphatase, ec:4.6.1.2 - cyclase, ec:3.1.4.35 - phosphodiesterase, ec:3.5.4.10 - cyclohydrolase, ec:3.1.5.1 - deoxy-GTPase, ec:3.6.1.9 - diphosphatase, ec:3.5.4.3 - deaminase, ec:3.6.1.17 - (asymmetrical), ec:1.17.4.1 - reductase, ec:3.6.1.3 - adenylpyrophosphatase, ec:3.1.4.17 - phosphodiesterase, ec:4.3.2.2 - lyase, ec:1.7.1.7 - reductase, ec:1.17.1.4 - dehydrogenase, ec:2.7.7.4 …
TRINITY_DN38302_c0_g1_i2	Carbon fixation pathways in prokaryotes, Citrate cycle (TCA cycle), Glyoxylate and dicarboxylate metabolism	map00720, map00020, map00630	21, 17, 18	ec:1.1.1.35 - dehydrogenase, ec:6.2.1.1 - ligase, ec:6.4.1.3 - carboxylase, ec:4.1.3.25 - lyase, ec:1.5.1.5 - dehydrogenase (NADP+), ec:1.1.1.37 - dehydrogenase, ec:1.1.1.42 - dehydrogenase (NADP+), ec:6.2.1.5 - ligase (ADP-forming), ec:5.1.99.1 - epimerase, ec:1.3.5.1 - dehydrogenase, ec:6.4.1.2 - carboxylase, ec:2.3.3.8 - citrate synthase, ec:1.5.1.20 - reductase [NAD(P)H], ec:5.4.99.2 - mutase…
TRINITY_DN337_c0_g1_i9	Purine metabolism, Thiamine metabolism	map00230, map00730	54, 7	ec:3.6.1.15 - phosphatase, ec:4.6.1.2 - cyclase, ec:3.1.4.35 - phosphodiesterase, ec:3.5.4.10 - cyclohydrolase, ec:3.1.5.1 - deoxy-GTPase, ec:3.6.1.9 - diphosphatase, ec:3.5.4.3 - deaminase, ec:3.6.1.17 - (asymmetrical), ec:1.17.4.1 - reductase, ec:3.6.1.3 - adenylpyrophosphatase, ec:3.1.4.17 - phosphodiesterase, ec:4.3.2.2 - lyase, ec:1.7.1.7 - reductase, ec:1.17.1.4 - dehydrogenase, ec:2.7.7.4 …
TRINITY_DN89836_c0_g1_i1	Sphingolipid metabolism, Other glycan degradation	map00600, map00511	18, 9	ec:2.7.1.138 - kinase, ec:3.2.1.45 - psychosine hydrolase, ec:2.7.8.27 - synthase, ec:3.1.4.12 - phosphodiesterase, ec:3.1.6.1 - sulfatase, ec:3.2.1.23 - lactase (ambiguous), ec:3.2.1.22 - melibiase, ec:2.3.1.50 - C-palmitoyltransferase, ec:3.5.1.23 - acylsphingosine deacylase, ec:3.2.1.46 - cerebroside galactosidase, ec:2.3.1.24 - N-acyltransferase, ec:3.1.4.41 - phosphodiesterase D, ec:3.1.3.4 …
TRINITY_DN337_c0_g1_i7	Purine metabolism, Thiamine metabolism	map00230, map00730	54, 7	ec:3.6.1.15 - phosphatase, ec:4.6.1.2 - cyclase, ec:3.1.4.35 - phosphodiesterase, ec:3.5.4.10 - cyclohydrolase, ec:3.1.5.1 - deoxy-GTPase, ec:3.6.1.9 - diphosphatase, ec:3.5.4.3 - deaminase, ec:3.6.1.17 - (asymmetrical), ec:1.17.4.1 - reductase, ec:3.6.1.3 - adenylpyrophosphatase, ec:3.1.4.17 - phosphodiesterase, ec:4.3.2.2 - lyase, ec:1.7.1.7 - reductase, ec:1.17.1.4 - dehydrogenase, ec:2.7.7.4 …
TRINITY_DN337_c0_g1_i6	Purine metabolism, Thiamine metabolism	map00230, map00730	54, 7	ec:3.6.1.15 - phosphatase, ec:4.6.1.2 - cyclase, ec:3.1.4.35 - phosphodiesterase, ec:3.5.4.10 - cyclohydrolase, ec:3.1.5.1 - deoxy-GTPase, ec:3.6.1.9 - diphosphatase, ec:3.5.4.3 - deaminase, ec:3.6.1.17 - (asymmetrical), ec:1.17.4.1 - reductase, ec:3.6.1.3 - adenylpyrophosphatase, ec:3.1.4.17 - phosphodiesterase, ec:4.3.2.2 - lyase, ec:1.7.1.7 - reductase, ec:1.17.1.4 - dehydrogenase, ec:2.7.7.4 …
TRINITY_DN337_c0_g1_i1	Purine metabolism, Thiamine metabolism	map00230, map00730	54, 7	ec:3.6.1.15 - phosphatase, ec:4.6.1.2 - cyclase, ec:3.1.4.35 - phosphodiesterase, ec:3.5.4.10 - cyclohydrolase, ec:3.1.5.1 - deoxy-GTPase, ec:3.6.1.9 - diphosphatase, ec:3.5.4.3 - deaminase, ec:3.6.1.17 - (asymmetrical), ec:1.17.4.1 - reductase, ec:3.6.1.3 - adenylpyrophosphatase, ec:3.1.4.17 - phosphodiesterase, ec:4.3.2.2 - lyase, ec:1.7.1.7 - reductase, ec:1.17.1.4 - dehydrogenase, ec:2.7.7.4 …
TRINITY_DN56709_c0_g1_i1	Toluene degradation, Biosynthesis of unsaturated fatty acids, Carbon fixation pathways in prokaryotes, Valine, leucine and isoleucine degradation, Fatty acid degradation, Tryptophan metabolism, Lysine degradation, Caprolactam degradation, Geraniol degradation, alpha-Linolenic acid metabolism, Ethylbenzene degradation, Benzoate degradation, Fatty acid elongation, Butanoate metabolism	map00623, map01040, map00720, map00280, map00071, map00380, map00310, map00930, map00281, map00592, map00642, map00362, map00062, map00650	1, 9, 21, 22, 13, 17, 18, 3, 4, 6, 1, 4, 12, 13	ec:1.1.1.35 - dehydrogenase, ec:2.3.1.199 - 3-oxoacyl-CoA synthase, ec:1.14.19.1 - 9-desaturase, ec:1.1.1.330 - 3-oxoacyl-CoA reductase, ec:1.3.1.93 - enoyl-CoA reductase, ec:1.3.3.6 - oxidase, ec:4.2.1.134 - (3R)-3-hydroxyacyl-CoA dehydratase, ec:2.3.1.16 - C-acyltransferase, ec:2.3.1.176 - C-acyltransferase, ec:3.1.2.2 - hydrolase, ec:1.1.1.35 - dehydrogenase, ec:6.2.1.1 - ligase, ec:6.4.1.3 - …
TRINITY_DN337_c0_g1_i3	Purine metabolism, Thiamine metabolism	map00230, map00730	54, 7	ec:3.6.1.15 - phosphatase, ec:4.6.1.2 - cyclase, ec:3.1.4.35 - phosphodiesterase, ec:3.5.4.10 - cyclohydrolase, ec:3.1.5.1 - deoxy-GTPase, ec:3.6.1.9 - diphosphatase, ec:3.5.4.3 - deaminase, ec:3.6.1.17 - (asymmetrical), ec:1.17.4.1 - reductase, ec:3.6.1.3 - adenylpyrophosphatase, ec:3.1.4.17 - phosphodiesterase, ec:4.3.2.2 - lyase, ec:1.7.1.7 - reductase, ec:1.17.1.4 - dehydrogenase, ec:2.7.7.4 …
TRINITY_DN337_c0_g1_i2	Purine metabolism, Thiamine metabolism	map00230, map00730	54, 7	ec:3.6.1.15 - phosphatase, ec:4.6.1.2 - cyclase, ec:3.1.4.35 - phosphodiesterase, ec:3.5.4.10 - cyclohydrolase, ec:3.1.5.1 - deoxy-GTPase, ec:3.6.1.9 - diphosphatase, ec:3.5.4.3 - deaminase, ec:3.6.1.17 - (asymmetrical), ec:1.17.4.1 - reductase, ec:3.6.1.3 - adenylpyrophosphatase, ec:3.1.4.17 - phosphodiesterase, ec:4.3.2.2 - lyase, ec:1.7.1.7 - reductase, ec:1.17.1.4 - dehydrogenase, ec:2.7.7.4 …
TRINITY_DN603_c0_g2_i1	Purine metabolism, Thiamine metabolism	map00230, map00730	54, 7	ec:3.6.1.15 - phosphatase, ec:4.6.1.2 - cyclase, ec:3.1.4.35 - phosphodiesterase, ec:3.5.4.10 - cyclohydrolase, ec:3.1.5.1 - deoxy-GTPase, ec:3.6.1.9 - diphosphatase, ec:3.5.4.3 - deaminase, ec:3.6.1.17 - (asymmetrical), ec:1.17.4.1 - reductase, ec:3.6.1.3 - adenylpyrophosphatase, ec:3.1.4.17 - phosphodiesterase, ec:4.3.2.2 - lyase, ec:1.7.1.7 - reductase, ec:1.17.1.4 - dehydrogenase, ec:2.7.7.4 …
TRINITY_DN306_c0_g1_i20	Purine metabolism, Thiamine metabolism	map00230, map00730	54, 7	ec:3.6.1.15 - phosphatase, ec:4.6.1.2 - cyclase, ec:3.1.4.35 - phosphodiesterase, ec:3.5.4.10 - cyclohydrolase, ec:3.1.5.1 - deoxy-GTPase, ec:3.6.1.9 - diphosphatase, ec:3.5.4.3 - deaminase, ec:3.6.1.17 - (asymmetrical), ec:1.17.4.1 - reductase, ec:3.6.1.3 - adenylpyrophosphatase, ec:3.1.4.17 - phosphodiesterase, ec:4.3.2.2 - lyase, ec:1.7.1.7 - reductase, ec:1.17.1.4 - dehydrogenase, ec:2.7.7.4 …
TRINITY_DN4929_c0_g1_i6	Porphyrin and chlorophyll metabolism	map00860	19	ec:4.99.1.1 - ferrochelatase, ec:2.3.1.37 - synthase, ec:4.2.1.75 - synthase, ec:1.3.1.24 - reductase, ec:1.14.14.18 - oxygenase (biliverdin-producing), ec:2.5.1.17 - adenosyltransferase, ec:1.3.3.4 - oxidase, ec:1.3.3.3 - oxidase, ec:3.2.1.31 - beta-glucuronide glucuronohydrolase glucuronidase, ec:2.5.1.61 - synthase, ec:4.1.1.37 - decarboxylase, ec:2.4.1.17 - 1-naphthol glucuronyltransferase, e…
TRINITY_DN7902_c0_g4_i1	T cell receptor signaling pathway, PD-L1 expression and PD-1 checkpoint pathway in cancer, Th1 and Th2 cell differentiation	map04660, map05235, map04658	2, 1, 1	ec:2.7.10.2 - protein-tyrosine kinase, ec:3.1.3.16 - phosphatase, ec:3.1.3.16 - phosphatase, ec:3.1.3.16 - phosphatase
TRINITY_DN48134_c0_g1_i2	Fatty acid degradation, Fatty acid biosynthesis	map00071, map00061	13, 5	ec:1.2.1.3 - dehydrogenase (NAD+), ec:1.1.1.35 - dehydrogenase, ec:6.2.1.3 - ligase, ec:1.3.3.6 - oxidase, ec:5.3.3.8 - isomerase, ec:2.3.1.16 - C-acyltransferase, ec:1.1.1.211 - dehydrogenase, ec:4.2.1.74 - hydratase, ec:2.3.1.21 - O-palmitoyltransferase, ec:2.3.1.9 - C-acetyltransferase, ec:1.1.1.1 - dehydrogenase, ec:1.3.8.8 - acyl-CoA dehydrogenase, ec:4.2.1.17 - hydratase, ec:2.3.1.39 - S-ma…
TRINITY_DN4929_c0_g1_i8	Porphyrin and chlorophyll metabolism	map00860	19	ec:4.99.1.1 - ferrochelatase, ec:2.3.1.37 - synthase, ec:4.2.1.75 - synthase, ec:1.3.1.24 - reductase, ec:1.14.14.18 - oxygenase (biliverdin-producing), ec:2.5.1.17 - adenosyltransferase, ec:1.3.3.4 - oxidase, ec:1.3.3.3 - oxidase, ec:3.2.1.31 - beta-glucuronide glucuronohydrolase glucuronidase, ec:2.5.1.61 - synthase, ec:4.1.1.37 - decarboxylase, ec:2.4.1.17 - 1-naphthol glucuronyltransferase, e…
TRINITY_DN48134_c0_g1_i1	Fatty acid degradation, Fatty acid biosynthesis	map00071, map00061	13, 5	ec:1.2.1.3 - dehydrogenase (NAD+), ec:1.1.1.35 - dehydrogenase, ec:6.2.1.3 - ligase, ec:1.3.3.6 - oxidase, ec:5.3.3.8 - isomerase, ec:2.3.1.16 - C-acyltransferase, ec:1.1.1.211 - dehydrogenase, ec:4.2.1.74 - hydratase, ec:2.3.1.21 - O-palmitoyltransferase, ec:2.3.1.9 - C-acetyltransferase, ec:1.1.1.1 - dehydrogenase, ec:1.3.8.8 - acyl-CoA dehydrogenase, ec:4.2.1.17 - hydratase, ec:2.3.1.39 - S-ma…
TRINITY_DN4929_c0_g1_i7	Porphyrin and chlorophyll metabolism	map00860	19	ec:4.99.1.1 - ferrochelatase, ec:2.3.1.37 - synthase, ec:4.2.1.75 - synthase, ec:1.3.1.24 - reductase, ec:1.14.14.18 - oxygenase (biliverdin-producing), ec:2.5.1.17 - adenosyltransferase, ec:1.3.3.4 - oxidase, ec:1.3.3.3 - oxidase, ec:3.2.1.31 - beta-glucuronide glucuronohydrolase glucuronidase, ec:2.5.1.61 - synthase, ec:4.1.1.37 - decarboxylase, ec:2.4.1.17 - 1-naphthol glucuronyltransferase, e…
TRINITY_DN48134_c0_g1_i4	Fatty acid degradation, Fatty acid biosynthesis	map00071, map00061	13, 5	ec:1.2.1.3 - dehydrogenase (NAD+), ec:1.1.1.35 - dehydrogenase, ec:6.2.1.3 - ligase, ec:1.3.3.6 - oxidase, ec:5.3.3.8 - isomerase, ec:2.3.1.16 - C-acyltransferase, ec:1.1.1.211 - dehydrogenase, ec:4.2.1.74 - hydratase, ec:2.3.1.21 - O-palmitoyltransferase, ec:2.3.1.9 - C-acetyltransferase, ec:1.1.1.1 - dehydrogenase, ec:1.3.8.8 - acyl-CoA dehydrogenase, ec:4.2.1.17 - hydratase, ec:2.3.1.39 - S-ma…
TRINITY_DN4929_c0_g1_i2	Porphyrin and chlorophyll metabolism	map00860	19	ec:4.99.1.1 - ferrochelatase, ec:2.3.1.37 - synthase, ec:4.2.1.75 - synthase, ec:1.3.1.24 - reductase, ec:1.14.14.18 - oxygenase (biliverdin-producing), ec:2.5.1.17 - adenosyltransferase, ec:1.3.3.4 - oxidase, ec:1.3.3.3 - oxidase, ec:3.2.1.31 - beta-glucuronide glucuronohydrolase glucuronidase, ec:2.5.1.61 - synthase, ec:4.1.1.37 - decarboxylase, ec:2.4.1.17 - 1-naphthol glucuronyltransferase, e…
TRINITY_DN48134_c0_g1_i3	Fatty acid degradation, Fatty acid biosynthesis	map00071, map00061	13, 5	ec:1.2.1.3 - dehydrogenase (NAD+), ec:1.1.1.35 - dehydrogenase, ec:6.2.1.3 - ligase, ec:1.3.3.6 - oxidase, ec:5.3.3.8 - isomerase, ec:2.3.1.16 - C-acyltransferase, ec:1.1.1.211 - dehydrogenase, ec:4.2.1.74 - hydratase, ec:2.3.1.21 - O-palmitoyltransferase, ec:2.3.1.9 - C-acetyltransferase, ec:1.1.1.1 - dehydrogenase, ec:1.3.8.8 - acyl-CoA dehydrogenase, ec:4.2.1.17 - hydratase, ec:2.3.1.39 - S-ma…
TRINITY_DN4929_c0_g1_i1	Porphyrin and chlorophyll metabolism	map00860	19	ec:4.99.1.1 - ferrochelatase, ec:2.3.1.37 - synthase, ec:4.2.1.75 - synthase, ec:1.3.1.24 - reductase, ec:1.14.14.18 - oxygenase (biliverdin-producing), ec:2.5.1.17 - adenosyltransferase, ec:1.3.3.4 - oxidase, ec:1.3.3.3 - oxidase, ec:3.2.1.31 - beta-glucuronide glucuronohydrolase glucuronidase, ec:2.5.1.61 - synthase, ec:4.1.1.37 - decarboxylase, ec:2.4.1.17 - 1-naphthol glucuronyltransferase, e…
TRINITY_DN48134_c0_g1_i6	Fatty acid degradation, Fatty acid biosynthesis	map00071, map00061	13, 5	ec:1.2.1.3 - dehydrogenase (NAD+), ec:1.1.1.35 - dehydrogenase, ec:6.2.1.3 - ligase, ec:1.3.3.6 - oxidase, ec:5.3.3.8 - isomerase, ec:2.3.1.16 - C-acyltransferase, ec:1.1.1.211 - dehydrogenase, ec:4.2.1.74 - hydratase, ec:2.3.1.21 - O-palmitoyltransferase, ec:2.3.1.9 - C-acetyltransferase, ec:1.1.1.1 - dehydrogenase, ec:1.3.8.8 - acyl-CoA dehydrogenase, ec:4.2.1.17 - hydratase, ec:2.3.1.39 - S-ma…
TRINITY_DN48134_c0_g1_i5	Fatty acid degradation, Fatty acid biosynthesis	map00071, map00061	13, 5	ec:1.2.1.3 - dehydrogenase (NAD+), ec:1.1.1.35 - dehydrogenase, ec:6.2.1.3 - ligase, ec:1.3.3.6 - oxidase, ec:5.3.3.8 - isomerase, ec:2.3.1.16 - C-acyltransferase, ec:1.1.1.211 - dehydrogenase, ec:4.2.1.74 - hydratase, ec:2.3.1.21 - O-palmitoyltransferase, ec:2.3.1.9 - C-acetyltransferase, ec:1.1.1.1 - dehydrogenase, ec:1.3.8.8 - acyl-CoA dehydrogenase, ec:4.2.1.17 - hydratase, ec:2.3.1.39 - S-ma…
TRINITY_DN4929_c0_g1_i3	Porphyrin and chlorophyll metabolism	map00860	19	ec:4.99.1.1 - ferrochelatase, ec:2.3.1.37 - synthase, ec:4.2.1.75 - synthase, ec:1.3.1.24 - reductase, ec:1.14.14.18 - oxygenase (biliverdin-producing), ec:2.5.1.17 - adenosyltransferase, ec:1.3.3.4 - oxidase, ec:1.3.3.3 - oxidase, ec:3.2.1.31 - beta-glucuronide glucuronohydrolase glucuronidase, ec:2.5.1.61 - synthase, ec:4.1.1.37 - decarboxylase, ec:2.4.1.17 - 1-naphthol glucuronyltransferase, e…
TRINITY_DN48134_c0_g1_i8	Fatty acid degradation, Fatty acid biosynthesis	map00071, map00061	13, 5	ec:1.2.1.3 - dehydrogenase (NAD+), ec:1.1.1.35 - dehydrogenase, ec:6.2.1.3 - ligase, ec:1.3.3.6 - oxidase, ec:5.3.3.8 - isomerase, ec:2.3.1.16 - C-acyltransferase, ec:1.1.1.211 - dehydrogenase, ec:4.2.1.74 - hydratase, ec:2.3.1.21 - O-palmitoyltransferase, ec:2.3.1.9 - C-acetyltransferase, ec:1.1.1.1 - dehydrogenase, ec:1.3.8.8 - acyl-CoA dehydrogenase, ec:4.2.1.17 - hydratase, ec:2.3.1.39 - S-ma…
TRINITY_DN48134_c0_g1_i7	Fatty acid degradation, Fatty acid biosynthesis	map00071, map00061	13, 5	ec:1.2.1.3 - dehydrogenase (NAD+), ec:1.1.1.35 - dehydrogenase, ec:6.2.1.3 - ligase, ec:1.3.3.6 - oxidase, ec:5.3.3.8 - isomerase, ec:2.3.1.16 - C-acyltransferase, ec:1.1.1.211 - dehydrogenase, ec:4.2.1.74 - hydratase, ec:2.3.1.21 - O-palmitoyltransferase, ec:2.3.1.9 - C-acetyltransferase, ec:1.1.1.1 - dehydrogenase, ec:1.3.8.8 - acyl-CoA dehydrogenase, ec:4.2.1.17 - hydratase, ec:2.3.1.39 - S-ma…
TRINITY_DN48134_c0_g1_i9	Fatty acid degradation, Fatty acid biosynthesis	map00071, map00061	13, 5	ec:1.2.1.3 - dehydrogenase (NAD+), ec:1.1.1.35 - dehydrogenase, ec:6.2.1.3 - ligase, ec:1.3.3.6 - oxidase, ec:5.3.3.8 - isomerase, ec:2.3.1.16 - C-acyltransferase, ec:1.1.1.211 - dehydrogenase, ec:4.2.1.74 - hydratase, ec:2.3.1.21 - O-palmitoyltransferase, ec:2.3.1.9 - C-acetyltransferase, ec:1.1.1.1 - dehydrogenase, ec:1.3.8.8 - acyl-CoA dehydrogenase, ec:4.2.1.17 - hydratase, ec:2.3.1.39 - S-ma…
TRINITY_DN31311_c1_g1_i2	Nitrogen metabolism	map00910	7	ec:4.2.1.1 - anhydrase, ec:1.4.1.2 - dehydrogenase, ec:6.3.1.2 - synthetase, ec:1.7.1.4 - reductase [NAD(P)H], ec:1.7.2.1 - reductase (NO-forming), ec:1.18.6.1 - reduced ferredoxin:dinitrogen oxidoreductase (ATP-hydrolysing), ec:1.4.1.3 - dehydrogenase [NAD(P)+]
TRINITY_DN105401_c0_g1_i1	Biosynthesis of unsaturated fatty acids, Fatty acid elongation	map01040, map00062	9, 12	ec:2.3.1.199 - 3-oxoacyl-CoA synthase, ec:1.14.19.1 - 9-desaturase, ec:1.1.1.330 - 3-oxoacyl-CoA reductase, ec:1.3.1.93 - enoyl-CoA reductase, ec:1.3.3.6 - oxidase, ec:4.2.1.134 - (3R)-3-hydroxyacyl-CoA dehydratase, ec:2.3.1.16 - C-acyltransferase, ec:2.3.1.176 - C-acyltransferase, ec:3.1.2.2 - hydrolase, ec:2.3.1.199 - 3-oxoacyl-CoA synthase, ec:1.3.1.38 - reductase (NADPH), ec:1.1.1.35 - dehydr…
TRINITY_DN306_c0_g1_i10	Purine metabolism, Thiamine metabolism	map00230, map00730	54, 7	ec:3.6.1.15 - phosphatase, ec:4.6.1.2 - cyclase, ec:3.1.4.35 - phosphodiesterase, ec:3.5.4.10 - cyclohydrolase, ec:3.1.5.1 - deoxy-GTPase, ec:3.6.1.9 - diphosphatase, ec:3.5.4.3 - deaminase, ec:3.6.1.17 - (asymmetrical), ec:1.17.4.1 - reductase, ec:3.6.1.3 - adenylpyrophosphatase, ec:3.1.4.17 - phosphodiesterase, ec:4.3.2.2 - lyase, ec:1.7.1.7 - reductase, ec:1.17.1.4 - dehydrogenase, ec:2.7.7.4 …
TRINITY_DN13285_c0_g1_i4	Purine metabolism, Thiamine metabolism	map00230, map00730	54, 7	ec:3.6.1.15 - phosphatase, ec:4.6.1.2 - cyclase, ec:3.1.4.35 - phosphodiesterase, ec:3.5.4.10 - cyclohydrolase, ec:3.1.5.1 - deoxy-GTPase, ec:3.6.1.9 - diphosphatase, ec:3.5.4.3 - deaminase, ec:3.6.1.17 - (asymmetrical), ec:1.17.4.1 - reductase, ec:3.6.1.3 - adenylpyrophosphatase, ec:3.1.4.17 - phosphodiesterase, ec:4.3.2.2 - lyase, ec:1.7.1.7 - reductase, ec:1.17.1.4 - dehydrogenase, ec:2.7.7.4 …
TRINITY_DN13285_c0_g1_i3	Purine metabolism, Thiamine metabolism	map00230, map00730	54, 7	ec:3.6.1.15 - phosphatase, ec:4.6.1.2 - cyclase, ec:3.1.4.35 - phosphodiesterase, ec:3.5.4.10 - cyclohydrolase, ec:3.1.5.1 - deoxy-GTPase, ec:3.6.1.9 - diphosphatase, ec:3.5.4.3 - deaminase, ec:3.6.1.17 - (asymmetrical), ec:1.17.4.1 - reductase, ec:3.6.1.3 - adenylpyrophosphatase, ec:3.1.4.17 - phosphodiesterase, ec:4.3.2.2 - lyase, ec:1.7.1.7 - reductase, ec:1.17.1.4 - dehydrogenase, ec:2.7.7.4 …
TRINITY_DN13285_c0_g1_i2	Purine metabolism, Thiamine metabolism	map00230, map00730	54, 7	ec:3.6.1.15 - phosphatase, ec:4.6.1.2 - cyclase, ec:3.1.4.35 - phosphodiesterase, ec:3.5.4.10 - cyclohydrolase, ec:3.1.5.1 - deoxy-GTPase, ec:3.6.1.9 - diphosphatase, ec:3.5.4.3 - deaminase, ec:3.6.1.17 - (asymmetrical), ec:1.17.4.1 - reductase, ec:3.6.1.3 - adenylpyrophosphatase, ec:3.1.4.17 - phosphodiesterase, ec:4.3.2.2 - lyase, ec:1.7.1.7 - reductase, ec:1.17.1.4 - dehydrogenase, ec:2.7.7.4 …
TRINITY_DN306_c0_g1_i14	Purine metabolism, Thiamine metabolism	map00230, map00730	54, 7	ec:3.6.1.15 - phosphatase, ec:4.6.1.2 - cyclase, ec:3.1.4.35 - phosphodiesterase, ec:3.5.4.10 - cyclohydrolase, ec:3.1.5.1 - deoxy-GTPase, ec:3.6.1.9 - diphosphatase, ec:3.5.4.3 - deaminase, ec:3.6.1.17 - (asymmetrical), ec:1.17.4.1 - reductase, ec:3.6.1.3 - adenylpyrophosphatase, ec:3.1.4.17 - phosphodiesterase, ec:4.3.2.2 - lyase, ec:1.7.1.7 - reductase, ec:1.17.1.4 - dehydrogenase, ec:2.7.7.4 …
TRINITY_DN306_c0_g1_i17	Purine metabolism, Thiamine metabolism	map00230, map00730	54, 7	ec:3.6.1.15 - phosphatase, ec:4.6.1.2 - cyclase, ec:3.1.4.35 - phosphodiesterase, ec:3.5.4.10 - cyclohydrolase, ec:3.1.5.1 - deoxy-GTPase, ec:3.6.1.9 - diphosphatase, ec:3.5.4.3 - deaminase, ec:3.6.1.17 - (asymmetrical), ec:1.17.4.1 - reductase, ec:3.6.1.3 - adenylpyrophosphatase, ec:3.1.4.17 - phosphodiesterase, ec:4.3.2.2 - lyase, ec:1.7.1.7 - reductase, ec:1.17.1.4 - dehydrogenase, ec:2.7.7.4 …
TRINITY_DN306_c0_g1_i18	Purine metabolism, Thiamine metabolism	map00230, map00730	54, 7	ec:3.6.1.15 - phosphatase, ec:4.6.1.2 - cyclase, ec:3.1.4.35 - phosphodiesterase, ec:3.5.4.10 - cyclohydrolase, ec:3.1.5.1 - deoxy-GTPase, ec:3.6.1.9 - diphosphatase, ec:3.5.4.3 - deaminase, ec:3.6.1.17 - (asymmetrical), ec:1.17.4.1 - reductase, ec:3.6.1.3 - adenylpyrophosphatase, ec:3.1.4.17 - phosphodiesterase, ec:4.3.2.2 - lyase, ec:1.7.1.7 - reductase, ec:1.17.1.4 - dehydrogenase, ec:2.7.7.4 …
TRINITY_DN35287_c1_g1_i1	Purine metabolism, Thiamine metabolism	map00230, map00730	54, 7	ec:3.6.1.15 - phosphatase, ec:4.6.1.2 - cyclase, ec:3.1.4.35 - phosphodiesterase, ec:3.5.4.10 - cyclohydrolase, ec:3.1.5.1 - deoxy-GTPase, ec:3.6.1.9 - diphosphatase, ec:3.5.4.3 - deaminase, ec:3.6.1.17 - (asymmetrical), ec:1.17.4.1 - reductase, ec:3.6.1.3 - adenylpyrophosphatase, ec:3.1.4.17 - phosphodiesterase, ec:4.3.2.2 - lyase, ec:1.7.1.7 - reductase, ec:1.17.1.4 - dehydrogenase, ec:2.7.7.4 …
TRINITY_DN7841_c0_g1_i5	Steroid biosynthesis	map00100	9	ec:1.3.1.21 - reductase, ec:5.4.99.7 - synthase, ec:1.3.1.71 - reductase, ec:3.1.1.13 - esterase, ec:1.3.1.70 - reductase, ec:1.1.1.270 - 3-dehydrogenase, ec:1.14.14.17 - monooxygenase, ec:5.3.3.5 - Delta-isomerase, ec:2.5.1.21 - synthase
TRINITY_DN7841_c0_g1_i6	Steroid biosynthesis	map00100	9	ec:1.3.1.21 - reductase, ec:5.4.99.7 - synthase, ec:1.3.1.71 - reductase, ec:3.1.1.13 - esterase, ec:1.3.1.70 - reductase, ec:1.1.1.270 - 3-dehydrogenase, ec:1.14.14.17 - monooxygenase, ec:5.3.3.5 - Delta-isomerase, ec:2.5.1.21 - synthase
TRINITY_DN6532_c3_g1_i2	Aminoacyl-tRNA biosynthesis	map00970	22	ec:6.1.1.22 - ligase, ec:6.1.1.19 - ligase, ec:2.1.2.9 - formyltransferase, ec:6.1.1.9 - ligase, ec:6.1.1.3 - ligase, ec:6.1.1.15 - ligase, ec:6.1.1.5 - ligase, ec:6.1.1.10 - ligase, ec:6.1.1.21 - ligase, ec:6.1.1.18 - ligase, ec:6.1.1.7 - ligase, ec:6.1.1.12 - ligase, ec:6.1.1.2 - ligase, ec:6.3.5.7 - synthase (glutamine-hydrolysing), ec:6.1.1.14 - ligase, ec:6.1.1.4 - ligase, ec:6.1.1.20 - liga…
TRINITY_DN7841_c0_g1_i4	Steroid biosynthesis	map00100	9	ec:1.3.1.21 - reductase, ec:5.4.99.7 - synthase, ec:1.3.1.71 - reductase, ec:3.1.1.13 - esterase, ec:1.3.1.70 - reductase, ec:1.1.1.270 - 3-dehydrogenase, ec:1.14.14.17 - monooxygenase, ec:5.3.3.5 - Delta-isomerase, ec:2.5.1.21 - synthase
TRINITY_DN7841_c0_g1_i9	Steroid biosynthesis	map00100	9	ec:1.3.1.21 - reductase, ec:5.4.99.7 - synthase, ec:1.3.1.71 - reductase, ec:3.1.1.13 - esterase, ec:1.3.1.70 - reductase, ec:1.1.1.270 - 3-dehydrogenase, ec:1.14.14.17 - monooxygenase, ec:5.3.3.5 - Delta-isomerase, ec:2.5.1.21 - synthase
TRINITY_DN7841_c0_g1_i7	Steroid biosynthesis	map00100	9	ec:1.3.1.21 - reductase, ec:5.4.99.7 - synthase, ec:1.3.1.71 - reductase, ec:3.1.1.13 - esterase, ec:1.3.1.70 - reductase, ec:1.1.1.270 - 3-dehydrogenase, ec:1.14.14.17 - monooxygenase, ec:5.3.3.5 - Delta-isomerase, ec:2.5.1.21 - synthase
TRINITY_DN7841_c0_g1_i8	Steroid biosynthesis	map00100	9	ec:1.3.1.21 - reductase, ec:5.4.99.7 - synthase, ec:1.3.1.71 - reductase, ec:3.1.1.13 - esterase, ec:1.3.1.70 - reductase, ec:1.1.1.270 - 3-dehydrogenase, ec:1.14.14.17 - monooxygenase, ec:5.3.3.5 - Delta-isomerase, ec:2.5.1.21 - synthase
TRINITY_DN7354_c0_g1_i2	Purine metabolism	map00230	54	ec:3.6.1.15 - phosphatase, ec:4.6.1.2 - cyclase, ec:3.1.4.35 - phosphodiesterase, ec:3.5.4.10 - cyclohydrolase, ec:3.1.5.1 - deoxy-GTPase, ec:3.6.1.9 - diphosphatase, ec:3.5.4.3 - deaminase, ec:3.6.1.17 - (asymmetrical), ec:1.17.4.1 - reductase, ec:3.6.1.3 - adenylpyrophosphatase, ec:3.1.4.17 - phosphodiesterase, ec:4.3.2.2 - lyase, ec:1.7.1.7 - reductase, ec:1.17.1.4 - dehydrogenase, ec:2.7.7.4 …
TRINITY_DN282313_c0_g1_i1	Glycerophospholipid metabolism, Ether lipid metabolism	map00564, map00565	30, 13	ec:3.1.4.4 - D, ec:2.7.7.15 - cytidylyltransferase, ec:2.3.1.51 - O-acyltransferase, ec:2.7.8.5 - 1-phosphatidyltransferase, ec:2.3.1.23 - O-acyltransferase, ec:2.3.1.42 - O-acyltransferase, ec:2.7.8.11 - 3-phosphatidyltransferase, ec:2.1.1.17 - N-methyltransferase, ec:1.1.1.8 - dehydrogenase (NAD+), ec:4.1.1.65 - decarboxylase, ec:2.7.8.1 - EPT, ec:2.7.7.41 - cytidylyltransferase, ec:2.7.1.107 -…
TRINITY_DN255663_c0_g1_i1	Purine metabolism	map00230	54	ec:3.6.1.15 - phosphatase, ec:4.6.1.2 - cyclase, ec:3.1.4.35 - phosphodiesterase, ec:3.5.4.10 - cyclohydrolase, ec:3.1.5.1 - deoxy-GTPase, ec:3.6.1.9 - diphosphatase, ec:3.5.4.3 - deaminase, ec:3.6.1.17 - (asymmetrical), ec:1.17.4.1 - reductase, ec:3.6.1.3 - adenylpyrophosphatase, ec:3.1.4.17 - phosphodiesterase, ec:4.3.2.2 - lyase, ec:1.7.1.7 - reductase, ec:1.17.1.4 - dehydrogenase, ec:2.7.7.4 …
TRINITY_DN25813_c0_g1_i5	Drug metabolism - other enzymes, Aminoacyl-tRNA biosynthesis	map00983, map00970	20, 22	ec:2.7.1.48 - kinase, ec:3.5.2.2 - hydantoinase, ec:3.1.1.1 - ali-esterase, ec:1.17.4.1 - reductase, ec:2.4.2.10 - phosphoribosyltransferase, ec:3.2.1.31 - beta-glucuronide glucuronohydrolase glucuronidase, ec:3.6.1.23 - diphosphatase, ec:3.5.4.5 - deaminase, ec:6.3.5.2 - synthase (glutamine-hydrolysing), ec:2.3.1.5 - N-acetyltransferase, ec:2.4.1.17 - 1-naphthol glucuronyltransferase, ec:2.4.2.8…
TRINITY_DN88975_c0_g1_i1	Purine metabolism, Thiamine metabolism	map00230, map00730	54, 7	ec:3.6.1.15 - phosphatase, ec:4.6.1.2 - cyclase, ec:3.1.4.35 - phosphodiesterase, ec:3.5.4.10 - cyclohydrolase, ec:3.1.5.1 - deoxy-GTPase, ec:3.6.1.9 - diphosphatase, ec:3.5.4.3 - deaminase, ec:3.6.1.17 - (asymmetrical), ec:1.17.4.1 - reductase, ec:3.6.1.3 - adenylpyrophosphatase, ec:3.1.4.17 - phosphodiesterase, ec:4.3.2.2 - lyase, ec:1.7.1.7 - reductase, ec:1.17.1.4 - dehydrogenase, ec:2.7.7.4 …
TRINITY_DN25813_c0_g1_i4	Drug metabolism - other enzymes, Aminoacyl-tRNA biosynthesis	map00983, map00970	20, 22	ec:2.7.1.48 - kinase, ec:3.5.2.2 - hydantoinase, ec:3.1.1.1 - ali-esterase, ec:1.17.4.1 - reductase, ec:2.4.2.10 - phosphoribosyltransferase, ec:3.2.1.31 - beta-glucuronide glucuronohydrolase glucuronidase, ec:3.6.1.23 - diphosphatase, ec:3.5.4.5 - deaminase, ec:6.3.5.2 - synthase (glutamine-hydrolysing), ec:2.3.1.5 - N-acetyltransferase, ec:2.4.1.17 - 1-naphthol glucuronyltransferase, ec:2.4.2.8…
TRINITY_DN75_c0_g2_i1	Biosynthesis of unsaturated fatty acids, Fatty acid elongation	map01040, map00062	9, 12	ec:2.3.1.199 - 3-oxoacyl-CoA synthase, ec:1.14.19.1 - 9-desaturase, ec:1.1.1.330 - 3-oxoacyl-CoA reductase, ec:1.3.1.93 - enoyl-CoA reductase, ec:1.3.3.6 - oxidase, ec:4.2.1.134 - (3R)-3-hydroxyacyl-CoA dehydratase, ec:2.3.1.16 - C-acyltransferase, ec:2.3.1.176 - C-acyltransferase, ec:3.1.2.2 - hydrolase, ec:2.3.1.199 - 3-oxoacyl-CoA synthase, ec:1.3.1.38 - reductase (NADPH), ec:1.1.1.35 - dehydr…
TRINITY_DN25813_c0_g1_i7	Drug metabolism - other enzymes, Aminoacyl-tRNA biosynthesis	map00983, map00970	20, 22	ec:2.7.1.48 - kinase, ec:3.5.2.2 - hydantoinase, ec:3.1.1.1 - ali-esterase, ec:1.17.4.1 - reductase, ec:2.4.2.10 - phosphoribosyltransferase, ec:3.2.1.31 - beta-glucuronide glucuronohydrolase glucuronidase, ec:3.6.1.23 - diphosphatase, ec:3.5.4.5 - deaminase, ec:6.3.5.2 - synthase (glutamine-hydrolysing), ec:2.3.1.5 - N-acetyltransferase, ec:2.4.1.17 - 1-naphthol glucuronyltransferase, ec:2.4.2.8…
TRINITY_DN8909_c0_g2_i14	Phosphonate and phosphinate metabolism, Glycerophospholipid metabolism, Ether lipid metabolism	map00440, map00564, map00565	3, 30, 13	ec:2.7.7.15 - cytidylyltransferase, ec:2.7.8.1 - EPT, ec:2.7.8.2 - cholinephosphotransferase, ec:3.1.4.4 - D, ec:2.7.7.15 - cytidylyltransferase, ec:2.3.1.51 - O-acyltransferase, ec:2.7.8.5 - 1-phosphatidyltransferase, ec:2.3.1.23 - O-acyltransferase, ec:2.3.1.42 - O-acyltransferase, ec:2.7.8.11 - 3-phosphatidyltransferase, ec:2.1.1.17 - N-methyltransferase, ec:1.1.1.8 - dehydrogenase (NAD+), ec:…
TRINITY_DN8909_c0_g2_i12	Phosphonate and phosphinate metabolism, Glycerophospholipid metabolism, Ether lipid metabolism	map00440, map00564, map00565	3, 30, 13	ec:2.7.7.15 - cytidylyltransferase, ec:2.7.8.1 - EPT, ec:2.7.8.2 - cholinephosphotransferase, ec:3.1.4.4 - D, ec:2.7.7.15 - cytidylyltransferase, ec:2.3.1.51 - O-acyltransferase, ec:2.7.8.5 - 1-phosphatidyltransferase, ec:2.3.1.23 - O-acyltransferase, ec:2.3.1.42 - O-acyltransferase, ec:2.7.8.11 - 3-phosphatidyltransferase, ec:2.1.1.17 - N-methyltransferase, ec:1.1.1.8 - dehydrogenase (NAD+), ec:…
TRINITY_DN25813_c0_g1_i9	Drug metabolism - other enzymes, Aminoacyl-tRNA biosynthesis	map00983, map00970	20, 22	ec:2.7.1.48 - kinase, ec:3.5.2.2 - hydantoinase, ec:3.1.1.1 - ali-esterase, ec:1.17.4.1 - reductase, ec:2.4.2.10 - phosphoribosyltransferase, ec:3.2.1.31 - beta-glucuronide glucuronohydrolase glucuronidase, ec:3.6.1.23 - diphosphatase, ec:3.5.4.5 - deaminase, ec:6.3.5.2 - synthase (glutamine-hydrolysing), ec:2.3.1.5 - N-acetyltransferase, ec:2.4.1.17 - 1-naphthol glucuronyltransferase, ec:2.4.2.8…
TRINITY_DN7841_c0_g1_i1	Steroid biosynthesis	map00100	9	ec:1.3.1.21 - reductase, ec:5.4.99.7 - synthase, ec:1.3.1.71 - reductase, ec:3.1.1.13 - esterase, ec:1.3.1.70 - reductase, ec:1.1.1.270 - 3-dehydrogenase, ec:1.14.14.17 - monooxygenase, ec:5.3.3.5 - Delta-isomerase, ec:2.5.1.21 - synthase
TRINITY_DN25813_c0_g1_i8	Drug metabolism - other enzymes, Aminoacyl-tRNA biosynthesis	map00983, map00970	20, 22	ec:2.7.1.48 - kinase, ec:3.5.2.2 - hydantoinase, ec:3.1.1.1 - ali-esterase, ec:1.17.4.1 - reductase, ec:2.4.2.10 - phosphoribosyltransferase, ec:3.2.1.31 - beta-glucuronide glucuronohydrolase glucuronidase, ec:3.6.1.23 - diphosphatase, ec:3.5.4.5 - deaminase, ec:6.3.5.2 - synthase (glutamine-hydrolysing), ec:2.3.1.5 - N-acetyltransferase, ec:2.4.1.17 - 1-naphthol glucuronyltransferase, ec:2.4.2.8…
TRINITY_DN40370_c0_g1_i2	Purine metabolism, Thiamine metabolism	map00230, map00730	54, 7	ec:3.6.1.15 - phosphatase, ec:4.6.1.2 - cyclase, ec:3.1.4.35 - phosphodiesterase, ec:3.5.4.10 - cyclohydrolase, ec:3.1.5.1 - deoxy-GTPase, ec:3.6.1.9 - diphosphatase, ec:3.5.4.3 - deaminase, ec:3.6.1.17 - (asymmetrical), ec:1.17.4.1 - reductase, ec:3.6.1.3 - adenylpyrophosphatase, ec:3.1.4.17 - phosphodiesterase, ec:4.3.2.2 - lyase, ec:1.7.1.7 - reductase, ec:1.17.1.4 - dehydrogenase, ec:2.7.7.4 …
TRINITY_DN40370_c0_g1_i1	Purine metabolism, Thiamine metabolism	map00230, map00730	54, 7	ec:3.6.1.15 - phosphatase, ec:4.6.1.2 - cyclase, ec:3.1.4.35 - phosphodiesterase, ec:3.5.4.10 - cyclohydrolase, ec:3.1.5.1 - deoxy-GTPase, ec:3.6.1.9 - diphosphatase, ec:3.5.4.3 - deaminase, ec:3.6.1.17 - (asymmetrical), ec:1.17.4.1 - reductase, ec:3.6.1.3 - adenylpyrophosphatase, ec:3.1.4.17 - phosphodiesterase, ec:4.3.2.2 - lyase, ec:1.7.1.7 - reductase, ec:1.17.1.4 - dehydrogenase, ec:2.7.7.4 …
TRINITY_DN97868_c0_g2_i1	Biosynthesis of unsaturated fatty acids, Glycerophospholipid metabolism, Fatty acid elongation	map01040, map00564, map00062	9, 30, 12	ec:2.3.1.199 - 3-oxoacyl-CoA synthase, ec:1.14.19.1 - 9-desaturase, ec:1.1.1.330 - 3-oxoacyl-CoA reductase, ec:1.3.1.93 - enoyl-CoA reductase, ec:1.3.3.6 - oxidase, ec:4.2.1.134 - (3R)-3-hydroxyacyl-CoA dehydratase, ec:2.3.1.16 - C-acyltransferase, ec:2.3.1.176 - C-acyltransferase, ec:3.1.2.2 - hydrolase, ec:3.1.4.4 - D, ec:2.7.7.15 - cytidylyltransferase, ec:2.3.1.51 - O-acyltransferase, ec:2.7.…
TRINITY_DN5917_c0_g1_i1	Various types of N-glycan biosynthesis, N-Glycan biosynthesis	map00513, map00510	13, 20	ec:2.4.1.38 - beta-1,4-galactosyltransferase, ec:2.4.1.101 - 2-beta-N-acetylglucosaminyltransferase, ec:2.4.1.68 - 6-alpha-L-fucosyltransferase, ec:2.4.1.131 - alpha-1,2-mannosyltransferase, ec:2.4.1.258 - alpha-1,3-mannosyltransferase, ec:2.4.1.141 - N-acetylglucosaminyltransferase, ec:2.4.1.132 - alpha-1,3-mannosyltransferase, ec:2.4.1.143 - 2-beta-N-acetylglucosaminyltransferase, ec:3.2.1.52 -…
TRINITY_DN5917_c0_g1_i2	Various types of N-glycan biosynthesis, N-Glycan biosynthesis	map00513, map00510	13, 20	ec:2.4.1.38 - beta-1,4-galactosyltransferase, ec:2.4.1.101 - 2-beta-N-acetylglucosaminyltransferase, ec:2.4.1.68 - 6-alpha-L-fucosyltransferase, ec:2.4.1.131 - alpha-1,2-mannosyltransferase, ec:2.4.1.258 - alpha-1,3-mannosyltransferase, ec:2.4.1.141 - N-acetylglucosaminyltransferase, ec:2.4.1.132 - alpha-1,3-mannosyltransferase, ec:2.4.1.143 - 2-beta-N-acetylglucosaminyltransferase, ec:3.2.1.52 -…
TRINITY_DN5917_c0_g1_i4	Various types of N-glycan biosynthesis, N-Glycan biosynthesis	map00513, map00510	13, 20	ec:2.4.1.38 - beta-1,4-galactosyltransferase, ec:2.4.1.101 - 2-beta-N-acetylglucosaminyltransferase, ec:2.4.1.68 - 6-alpha-L-fucosyltransferase, ec:2.4.1.131 - alpha-1,2-mannosyltransferase, ec:2.4.1.258 - alpha-1,3-mannosyltransferase, ec:2.4.1.141 - N-acetylglucosaminyltransferase, ec:2.4.1.132 - alpha-1,3-mannosyltransferase, ec:2.4.1.143 - 2-beta-N-acetylglucosaminyltransferase, ec:3.2.1.52 -…
TRINITY_DN287041_c0_g1_i1	Drug metabolism - other enzymes, Glycerolipid metabolism	map00983, map00561	20, 19	ec:2.7.1.48 - kinase, ec:3.5.2.2 - hydantoinase, ec:3.1.1.1 - ali-esterase, ec:1.17.4.1 - reductase, ec:2.4.2.10 - phosphoribosyltransferase, ec:3.2.1.31 - beta-glucuronide glucuronohydrolase glucuronidase, ec:3.6.1.23 - diphosphatase, ec:3.5.4.5 - deaminase, ec:6.3.5.2 - synthase (glutamine-hydrolysing), ec:2.3.1.5 - N-acetyltransferase, ec:2.4.1.17 - 1-naphthol glucuronyltransferase, ec:2.4.2.8…
TRINITY_DN515_c1_g2_i5	D-Glutamine and D-glutamate metabolism, Nicotinate and nicotinamide metabolism, Arginine biosynthesis, Alanine, aspartate and glutamate metabolism	map00471, map00760, map00220, map00250	4, 16, 14, 23	ec:5.1.1.10 - racemase, ec:4.2.1.48 - cyclase, ec:3.5.1.2 - glutaminase I, ec:1.4.1.3 - dehydrogenase [NAD(P)+], ec:6.3.4.21 - phosphoribosyltransferase, ec:2.7.7.1 - adenylyltransferase, ec:3.6.1.9 - diphosphatase, ec:2.7.1.23 - kinase, ec:1.6.1.2 - transhydrogenase (Re/Si-specific), ec:3.6.1.22 - diphosphatase, ec:3.1.3.5 - uridine 5'-nucleotidase, ec:1.2.1.24 - dehydrogenase (NAD+), ec:2.4.2.1…
TRINITY_DN515_c1_g2_i3	D-Glutamine and D-glutamate metabolism, Nicotinate and nicotinamide metabolism, Arginine biosynthesis, Alanine, aspartate and glutamate metabolism	map00471, map00760, map00220, map00250	4, 16, 14, 23	ec:5.1.1.10 - racemase, ec:4.2.1.48 - cyclase, ec:3.5.1.2 - glutaminase I, ec:1.4.1.3 - dehydrogenase [NAD(P)+], ec:6.3.4.21 - phosphoribosyltransferase, ec:2.7.7.1 - adenylyltransferase, ec:3.6.1.9 - diphosphatase, ec:2.7.1.23 - kinase, ec:1.6.1.2 - transhydrogenase (Re/Si-specific), ec:3.6.1.22 - diphosphatase, ec:3.1.3.5 - uridine 5'-nucleotidase, ec:1.2.1.24 - dehydrogenase (NAD+), ec:2.4.2.1…
TRINITY_DN515_c1_g2_i7	D-Glutamine and D-glutamate metabolism, Nicotinate and nicotinamide metabolism, Arginine biosynthesis, Alanine, aspartate and glutamate metabolism	map00471, map00760, map00220, map00250	4, 16, 14, 23	ec:5.1.1.10 - racemase, ec:4.2.1.48 - cyclase, ec:3.5.1.2 - glutaminase I, ec:1.4.1.3 - dehydrogenase [NAD(P)+], ec:6.3.4.21 - phosphoribosyltransferase, ec:2.7.7.1 - adenylyltransferase, ec:3.6.1.9 - diphosphatase, ec:2.7.1.23 - kinase, ec:1.6.1.2 - transhydrogenase (Re/Si-specific), ec:3.6.1.22 - diphosphatase, ec:3.1.3.5 - uridine 5'-nucleotidase, ec:1.2.1.24 - dehydrogenase (NAD+), ec:2.4.2.1…
TRINITY_DN30051_c0_g1_i1	Purine metabolism, Thiamine metabolism	map00230, map00730	54, 7	ec:3.6.1.15 - phosphatase, ec:4.6.1.2 - cyclase, ec:3.1.4.35 - phosphodiesterase, ec:3.5.4.10 - cyclohydrolase, ec:3.1.5.1 - deoxy-GTPase, ec:3.6.1.9 - diphosphatase, ec:3.5.4.3 - deaminase, ec:3.6.1.17 - (asymmetrical), ec:1.17.4.1 - reductase, ec:3.6.1.3 - adenylpyrophosphatase, ec:3.1.4.17 - phosphodiesterase, ec:4.3.2.2 - lyase, ec:1.7.1.7 - reductase, ec:1.17.1.4 - dehydrogenase, ec:2.7.7.4 …
TRINITY_DN1363_c0_g1_i11	Aminoacyl-tRNA biosynthesis	map00970	22	ec:6.1.1.22 - ligase, ec:6.1.1.19 - ligase, ec:2.1.2.9 - formyltransferase, ec:6.1.1.9 - ligase, ec:6.1.1.3 - ligase, ec:6.1.1.15 - ligase, ec:6.1.1.5 - ligase, ec:6.1.1.10 - ligase, ec:6.1.1.21 - ligase, ec:6.1.1.18 - ligase, ec:6.1.1.7 - ligase, ec:6.1.1.12 - ligase, ec:6.1.1.2 - ligase, ec:6.3.5.7 - synthase (glutamine-hydrolysing), ec:6.1.1.14 - ligase, ec:6.1.1.4 - ligase, ec:6.1.1.20 - liga…
TRINITY_DN27793_c0_g1_i4	Purine metabolism	map00230	54	ec:3.6.1.15 - phosphatase, ec:4.6.1.2 - cyclase, ec:3.1.4.35 - phosphodiesterase, ec:3.5.4.10 - cyclohydrolase, ec:3.1.5.1 - deoxy-GTPase, ec:3.6.1.9 - diphosphatase, ec:3.5.4.3 - deaminase, ec:3.6.1.17 - (asymmetrical), ec:1.17.4.1 - reductase, ec:3.6.1.3 - adenylpyrophosphatase, ec:3.1.4.17 - phosphodiesterase, ec:4.3.2.2 - lyase, ec:1.7.1.7 - reductase, ec:1.17.1.4 - dehydrogenase, ec:2.7.7.4 …
TRINITY_DN1363_c0_g1_i13	Aminoacyl-tRNA biosynthesis	map00970	22	ec:6.1.1.22 - ligase, ec:6.1.1.19 - ligase, ec:2.1.2.9 - formyltransferase, ec:6.1.1.9 - ligase, ec:6.1.1.3 - ligase, ec:6.1.1.15 - ligase, ec:6.1.1.5 - ligase, ec:6.1.1.10 - ligase, ec:6.1.1.21 - ligase, ec:6.1.1.18 - ligase, ec:6.1.1.7 - ligase, ec:6.1.1.12 - ligase, ec:6.1.1.2 - ligase, ec:6.3.5.7 - synthase (glutamine-hydrolysing), ec:6.1.1.14 - ligase, ec:6.1.1.4 - ligase, ec:6.1.1.20 - liga…
TRINITY_DN27793_c0_g1_i1	Purine metabolism	map00230	54	ec:3.6.1.15 - phosphatase, ec:4.6.1.2 - cyclase, ec:3.1.4.35 - phosphodiesterase, ec:3.5.4.10 - cyclohydrolase, ec:3.1.5.1 - deoxy-GTPase, ec:3.6.1.9 - diphosphatase, ec:3.5.4.3 - deaminase, ec:3.6.1.17 - (asymmetrical), ec:1.17.4.1 - reductase, ec:3.6.1.3 - adenylpyrophosphatase, ec:3.1.4.17 - phosphodiesterase, ec:4.3.2.2 - lyase, ec:1.7.1.7 - reductase, ec:1.17.1.4 - dehydrogenase, ec:2.7.7.4 …
TRINITY_DN56510_c0_g1_i1	T cell receptor signaling pathway, PD-L1 expression and PD-1 checkpoint pathway in cancer, Th1 and Th2 cell differentiation	map04660, map05235, map04658	2, 1, 1	ec:2.7.10.2 - protein-tyrosine kinase, ec:3.1.3.16 - phosphatase, ec:3.1.3.16 - phosphatase, ec:3.1.3.16 - phosphatase
TRINITY_DN1363_c0_g1_i10	Aminoacyl-tRNA biosynthesis	map00970	22	ec:6.1.1.22 - ligase, ec:6.1.1.19 - ligase, ec:2.1.2.9 - formyltransferase, ec:6.1.1.9 - ligase, ec:6.1.1.3 - ligase, ec:6.1.1.15 - ligase, ec:6.1.1.5 - ligase, ec:6.1.1.10 - ligase, ec:6.1.1.21 - ligase, ec:6.1.1.18 - ligase, ec:6.1.1.7 - ligase, ec:6.1.1.12 - ligase, ec:6.1.1.2 - ligase, ec:6.3.5.7 - synthase (glutamine-hydrolysing), ec:6.1.1.14 - ligase, ec:6.1.1.4 - ligase, ec:6.1.1.20 - liga…
TRINITY_DN16666_c0_g1_i1	Geraniol degradation, Toluene degradation, Carbon fixation pathways in prokaryotes, Benzoate degradation, Valine, leucine and isoleucine degradation, Fatty acid degradation, Tryptophan metabolism, Fatty acid elongation, Lysine degradation, Butanoate metabolism, Caprolactam degradation	map00281, map00623, map00720, map00362, map00280, map00071, map00380, map00062, map00310, map00650, map00930	4, 1, 21, 4, 22, 13, 17, 12, 18, 13, 3	ec:1.1.1.35 - dehydrogenase, ec:2.3.1.16 - C-acyltransferase, ec:4.2.1.17 - hydratase, ec:4.1.3.4 - lyase, ec:1.1.1.35 - dehydrogenase, ec:1.1.1.35 - dehydrogenase, ec:6.2.1.1 - ligase, ec:6.4.1.3 - carboxylase, ec:4.1.3.25 - lyase, ec:1.5.1.5 - dehydrogenase (NADP+), ec:1.1.1.37 - dehydrogenase, ec:1.1.1.42 - dehydrogenase (NADP+), ec:6.2.1.5 - ligase (ADP-forming), ec:5.1.99.1 - epimerase, ec:1…
TRINITY_DN225684_c0_g1_i1	Glycine, serine and threonine metabolism, Methane metabolism, Glyoxylate and dicarboxylate metabolism, One carbon pool by folate, Cyanoamino acid metabolism	map00260, map00680, map00630, map00670, map00460	30, 13, 18, 15, 3	ec:1.2.1.8 - dehydrogenase, ec:1.4.4.2 - dehydrogenase (aminomethyl-transferring), ec:2.3.1.37 - synthase, ec:2.7.1.31 - 3-kinase, ec:4.1.2.5 - aldolase, ec:2.1.1.20 - N-methyltransferase, ec:1.8.1.4 - dehydrogenase, ec:2.1.1.156 - N-methyltransferase, ec:1.5.8.4 - dehydrogenase, ec:1.4.3.21 - oxidase, ec:4.2.1.22 - beta-synthase, ec:1.4.3.3 - oxidase, ec:2.1.2.1 - hydroxymethyltransferase, ec:1.…
TRINITY_DN1363_c0_g1_i18	Aminoacyl-tRNA biosynthesis	map00970	22	ec:6.1.1.22 - ligase, ec:6.1.1.19 - ligase, ec:2.1.2.9 - formyltransferase, ec:6.1.1.9 - ligase, ec:6.1.1.3 - ligase, ec:6.1.1.15 - ligase, ec:6.1.1.5 - ligase, ec:6.1.1.10 - ligase, ec:6.1.1.21 - ligase, ec:6.1.1.18 - ligase, ec:6.1.1.7 - ligase, ec:6.1.1.12 - ligase, ec:6.1.1.2 - ligase, ec:6.3.5.7 - synthase (glutamine-hydrolysing), ec:6.1.1.14 - ligase, ec:6.1.1.4 - ligase, ec:6.1.1.20 - liga…
TRINITY_DN24_c1_g1_i4	Fructose and mannose metabolism, Methane metabolism, Glycerolipid metabolism	map00051, map00680, map00561	21, 13, 19	ec:2.7.1.28 - triose kinase, ec:1.1.1.271 - synthase, ec:3.1.3.46 - 2-phosphatase, ec:2.7.1.105 - phosphofructokinase 2, ec:1.1.1.21 - reductase, ec:4.2.1.47 - 4,6-dehydratase, ec:2.7.1.7 - mannokinase (phosphorylating), ec:5.4.2.8 - mannose phosphomutase, ec:5.3.1.1 - isomerase, ec:2.7.7.13 - guanylyltransferase, ec:4.2.1.68 - dehydratase, ec:2.7.1.11 - phosphohexokinase, ec:2.7.1.4 - fructokina…
TRINITY_DN28474_c0_g1_i1	Purine metabolism, Thiamine metabolism	map00230, map00730	54, 7	ec:3.6.1.15 - phosphatase, ec:4.6.1.2 - cyclase, ec:3.1.4.35 - phosphodiesterase, ec:3.5.4.10 - cyclohydrolase, ec:3.1.5.1 - deoxy-GTPase, ec:3.6.1.9 - diphosphatase, ec:3.5.4.3 - deaminase, ec:3.6.1.17 - (asymmetrical), ec:1.17.4.1 - reductase, ec:3.6.1.3 - adenylpyrophosphatase, ec:3.1.4.17 - phosphodiesterase, ec:4.3.2.2 - lyase, ec:1.7.1.7 - reductase, ec:1.17.1.4 - dehydrogenase, ec:2.7.7.4 …
TRINITY_DN269103_c0_g1_i1	Nicotinate and nicotinamide metabolism	map00760	16	ec:6.3.4.21 - phosphoribosyltransferase, ec:2.7.7.1 - adenylyltransferase, ec:3.6.1.9 - diphosphatase, ec:2.7.1.23 - kinase, ec:1.6.1.2 - transhydrogenase (Re/Si-specific), ec:3.6.1.22 - diphosphatase, ec:3.1.3.5 - uridine 5'-nucleotidase, ec:1.2.1.24 - dehydrogenase (NAD+), ec:2.4.2.12 - phosphoribosyltransferase, ec:3.2.2.6 - cyclase/cyclic ADP-ribose hydrolase, ec:1.2.1.16 - dehydrogenase [NAD…
TRINITY_DN259275_c0_g1_i1	Glycerophospholipid metabolism	map00564	30	ec:3.1.4.4 - D, ec:2.7.7.15 - cytidylyltransferase, ec:2.3.1.51 - O-acyltransferase, ec:2.7.8.5 - 1-phosphatidyltransferase, ec:2.3.1.23 - O-acyltransferase, ec:2.3.1.42 - O-acyltransferase, ec:2.7.8.11 - 3-phosphatidyltransferase, ec:2.1.1.17 - N-methyltransferase, ec:1.1.1.8 - dehydrogenase (NAD+), ec:4.1.1.65 - decarboxylase, ec:2.7.8.1 - EPT, ec:2.7.7.41 - cytidylyltransferase, ec:2.7.1.107 -…
TRINITY_DN24_c1_g1_i9	Fructose and mannose metabolism, Methane metabolism, Glycerolipid metabolism	map00051, map00680, map00561	21, 13, 19	ec:2.7.1.28 - triose kinase, ec:1.1.1.271 - synthase, ec:3.1.3.46 - 2-phosphatase, ec:2.7.1.105 - phosphofructokinase 2, ec:1.1.1.21 - reductase, ec:4.2.1.47 - 4,6-dehydratase, ec:2.7.1.7 - mannokinase (phosphorylating), ec:5.4.2.8 - mannose phosphomutase, ec:5.3.1.1 - isomerase, ec:2.7.7.13 - guanylyltransferase, ec:4.2.1.68 - dehydratase, ec:2.7.1.11 - phosphohexokinase, ec:2.7.1.4 - fructokina…
TRINITY_DN3307_c0_g1_i1	Galactose metabolism, Amino sugar and nucleotide sugar metabolism, Glycolysis / Gluconeogenesis, Streptomycin biosynthesis, Fructose and mannose metabolism, Starch and sucrose metabolism, Neomycin, kanamycin and gentamicin biosynthesis	map00052, map00520, map00010, map00521, map00051, map00500, map00524	19, 35, 27, 6, 21, 21, 2	ec:5.1.3.2 - 4-epimerase, ec:3.2.1.10 - limit dextrinase (erroneous), ec:3.2.1.26 - invertase, ec:2.7.7.64 - uridylyltransferase, ec:3.2.1.20 - maltase, ec:2.7.7.9 - uridylyltransferase, ec:1.1.1.21 - reductase, ec:2.7.1.2 - glucokinase (phosphorylating), ec:3.2.1.23 - lactase (ambiguous), ec:3.2.1.22 - melibiase, ec:5.4.2.2 - (alpha-D-glucose-1,6-bisphosphate-dependent), ec:2.7.1.11 - phosphohex…
TRINITY_DN3307_c0_g1_i6	Galactose metabolism, Amino sugar and nucleotide sugar metabolism, Glycolysis / Gluconeogenesis, Streptomycin biosynthesis, Fructose and mannose metabolism, Starch and sucrose metabolism, Neomycin, kanamycin and gentamicin biosynthesis	map00052, map00520, map00010, map00521, map00051, map00500, map00524	19, 35, 27, 6, 21, 21, 2	ec:5.1.3.2 - 4-epimerase, ec:3.2.1.10 - limit dextrinase (erroneous), ec:3.2.1.26 - invertase, ec:2.7.7.64 - uridylyltransferase, ec:3.2.1.20 - maltase, ec:2.7.7.9 - uridylyltransferase, ec:1.1.1.21 - reductase, ec:2.7.1.2 - glucokinase (phosphorylating), ec:3.2.1.23 - lactase (ambiguous), ec:3.2.1.22 - melibiase, ec:5.4.2.2 - (alpha-D-glucose-1,6-bisphosphate-dependent), ec:2.7.1.11 - phosphohex…
TRINITY_DN3307_c0_g1_i4	Galactose metabolism, Amino sugar and nucleotide sugar metabolism, Glycolysis / Gluconeogenesis, Streptomycin biosynthesis, Fructose and mannose metabolism, Starch and sucrose metabolism, Neomycin, kanamycin and gentamicin biosynthesis	map00052, map00520, map00010, map00521, map00051, map00500, map00524	19, 35, 27, 6, 21, 21, 2	ec:5.1.3.2 - 4-epimerase, ec:3.2.1.10 - limit dextrinase (erroneous), ec:3.2.1.26 - invertase, ec:2.7.7.64 - uridylyltransferase, ec:3.2.1.20 - maltase, ec:2.7.7.9 - uridylyltransferase, ec:1.1.1.21 - reductase, ec:2.7.1.2 - glucokinase (phosphorylating), ec:3.2.1.23 - lactase (ambiguous), ec:3.2.1.22 - melibiase, ec:5.4.2.2 - (alpha-D-glucose-1,6-bisphosphate-dependent), ec:2.7.1.11 - phosphohex…
TRINITY_DN820_c0_g2_i1	Purine metabolism, Thiamine metabolism	map00230, map00730	54, 7	ec:3.6.1.15 - phosphatase, ec:4.6.1.2 - cyclase, ec:3.1.4.35 - phosphodiesterase, ec:3.5.4.10 - cyclohydrolase, ec:3.1.5.1 - deoxy-GTPase, ec:3.6.1.9 - diphosphatase, ec:3.5.4.3 - deaminase, ec:3.6.1.17 - (asymmetrical), ec:1.17.4.1 - reductase, ec:3.6.1.3 - adenylpyrophosphatase, ec:3.1.4.17 - phosphodiesterase, ec:4.3.2.2 - lyase, ec:1.7.1.7 - reductase, ec:1.17.1.4 - dehydrogenase, ec:2.7.7.4 …
TRINITY_DN3307_c0_g1_i8	Galactose metabolism, Amino sugar and nucleotide sugar metabolism, Glycolysis / Gluconeogenesis, Streptomycin biosynthesis, Fructose and mannose metabolism, Starch and sucrose metabolism, Neomycin, kanamycin and gentamicin biosynthesis	map00052, map00520, map00010, map00521, map00051, map00500, map00524	19, 35, 27, 6, 21, 21, 2	ec:5.1.3.2 - 4-epimerase, ec:3.2.1.10 - limit dextrinase (erroneous), ec:3.2.1.26 - invertase, ec:2.7.7.64 - uridylyltransferase, ec:3.2.1.20 - maltase, ec:2.7.7.9 - uridylyltransferase, ec:1.1.1.21 - reductase, ec:2.7.1.2 - glucokinase (phosphorylating), ec:3.2.1.23 - lactase (ambiguous), ec:3.2.1.22 - melibiase, ec:5.4.2.2 - (alpha-D-glucose-1,6-bisphosphate-dependent), ec:2.7.1.11 - phosphohex…
TRINITY_DN90462_c0_g1_i1	Purine metabolism, Thiamine metabolism	map00230, map00730	54, 7	ec:3.6.1.15 - phosphatase, ec:4.6.1.2 - cyclase, ec:3.1.4.35 - phosphodiesterase, ec:3.5.4.10 - cyclohydrolase, ec:3.1.5.1 - deoxy-GTPase, ec:3.6.1.9 - diphosphatase, ec:3.5.4.3 - deaminase, ec:3.6.1.17 - (asymmetrical), ec:1.17.4.1 - reductase, ec:3.6.1.3 - adenylpyrophosphatase, ec:3.1.4.17 - phosphodiesterase, ec:4.3.2.2 - lyase, ec:1.7.1.7 - reductase, ec:1.17.1.4 - dehydrogenase, ec:2.7.7.4 …
TRINITY_DN70544_c0_g2_i1	Purine metabolism, Thiamine metabolism	map00230, map00730	54, 7	ec:3.6.1.15 - phosphatase, ec:4.6.1.2 - cyclase, ec:3.1.4.35 - phosphodiesterase, ec:3.5.4.10 - cyclohydrolase, ec:3.1.5.1 - deoxy-GTPase, ec:3.6.1.9 - diphosphatase, ec:3.5.4.3 - deaminase, ec:3.6.1.17 - (asymmetrical), ec:1.17.4.1 - reductase, ec:3.6.1.3 - adenylpyrophosphatase, ec:3.1.4.17 - phosphodiesterase, ec:4.3.2.2 - lyase, ec:1.7.1.7 - reductase, ec:1.17.1.4 - dehydrogenase, ec:2.7.7.4 …
TRINITY_DN607_c0_g1_i2	T cell receptor signaling pathway, PD-L1 expression and PD-1 checkpoint pathway in cancer, Th1 and Th2 cell differentiation	map04660, map05235, map04658	2, 1, 1	ec:2.7.10.2 - protein-tyrosine kinase, ec:3.1.3.16 - phosphatase, ec:3.1.3.16 - phosphatase, ec:3.1.3.16 - phosphatase
TRINITY_DN374_c0_g1_i3	Folate biosynthesis	map00790	19	ec:3.4.19.9 - gamma-glutamyl hydrolase, ec:1.14.16.4 - 5-monooxygenase, ec:1.1.1.184 - reductase (NADPH), ec:2.7.7.75 - adenylyltransferase, ec:1.1.1.21 - reductase, ec:4.2.3.12 - synthase, ec:1.14.16.1 - 4-monooxygenase, ec:2.10.1.1 - molybdotransferase, ec:4.2.1.96 - dehydratase, ec:2.8.1.12 - synthase, ec:1.5.1.34 - reductase, ec:1.1.1.153 - reductase (L-erythro-7,8-dihydrobiopterin forming), …
TRINITY_DN607_c0_g1_i4	T cell receptor signaling pathway, PD-L1 expression and PD-1 checkpoint pathway in cancer, Th1 and Th2 cell differentiation	map04660, map05235, map04658	2, 1, 1	ec:2.7.10.2 - protein-tyrosine kinase, ec:3.1.3.16 - phosphatase, ec:3.1.3.16 - phosphatase, ec:3.1.3.16 - phosphatase
TRINITY_DN1278_c0_g1_i3	Nicotinate and nicotinamide metabolism	map00760	16	ec:6.3.4.21 - phosphoribosyltransferase, ec:2.7.7.1 - adenylyltransferase, ec:3.6.1.9 - diphosphatase, ec:2.7.1.23 - kinase, ec:1.6.1.2 - transhydrogenase (Re/Si-specific), ec:3.6.1.22 - diphosphatase, ec:3.1.3.5 - uridine 5'-nucleotidase, ec:1.2.1.24 - dehydrogenase (NAD+), ec:2.4.2.12 - phosphoribosyltransferase, ec:3.2.2.6 - cyclase/cyclic ADP-ribose hydrolase, ec:1.2.1.16 - dehydrogenase [NAD…
TRINITY_DN374_c0_g1_i2	Folate biosynthesis	map00790	19	ec:3.4.19.9 - gamma-glutamyl hydrolase, ec:1.14.16.4 - 5-monooxygenase, ec:1.1.1.184 - reductase (NADPH), ec:2.7.7.75 - adenylyltransferase, ec:1.1.1.21 - reductase, ec:4.2.3.12 - synthase, ec:1.14.16.1 - 4-monooxygenase, ec:2.10.1.1 - molybdotransferase, ec:4.2.1.96 - dehydratase, ec:2.8.1.12 - synthase, ec:1.5.1.34 - reductase, ec:1.1.1.153 - reductase (L-erythro-7,8-dihydrobiopterin forming), …
TRINITY_DN607_c0_g1_i5	T cell receptor signaling pathway, PD-L1 expression and PD-1 checkpoint pathway in cancer, Th1 and Th2 cell differentiation	map04660, map05235, map04658	2, 1, 1	ec:2.7.10.2 - protein-tyrosine kinase, ec:3.1.3.16 - phosphatase, ec:3.1.3.16 - phosphatase, ec:3.1.3.16 - phosphatase
TRINITY_DN1278_c0_g1_i4	Nicotinate and nicotinamide metabolism	map00760	16	ec:6.3.4.21 - phosphoribosyltransferase, ec:2.7.7.1 - adenylyltransferase, ec:3.6.1.9 - diphosphatase, ec:2.7.1.23 - kinase, ec:1.6.1.2 - transhydrogenase (Re/Si-specific), ec:3.6.1.22 - diphosphatase, ec:3.1.3.5 - uridine 5'-nucleotidase, ec:1.2.1.24 - dehydrogenase (NAD+), ec:2.4.2.12 - phosphoribosyltransferase, ec:3.2.2.6 - cyclase/cyclic ADP-ribose hydrolase, ec:1.2.1.16 - dehydrogenase [NAD…
TRINITY_DN1278_c0_g1_i1	Nicotinate and nicotinamide metabolism	map00760	16	ec:6.3.4.21 - phosphoribosyltransferase, ec:2.7.7.1 - adenylyltransferase, ec:3.6.1.9 - diphosphatase, ec:2.7.1.23 - kinase, ec:1.6.1.2 - transhydrogenase (Re/Si-specific), ec:3.6.1.22 - diphosphatase, ec:3.1.3.5 - uridine 5'-nucleotidase, ec:1.2.1.24 - dehydrogenase (NAD+), ec:2.4.2.12 - phosphoribosyltransferase, ec:3.2.2.6 - cyclase/cyclic ADP-ribose hydrolase, ec:1.2.1.16 - dehydrogenase [NAD…
TRINITY_DN1278_c0_g1_i2	Nicotinate and nicotinamide metabolism	map00760	16	ec:6.3.4.21 - phosphoribosyltransferase, ec:2.7.7.1 - adenylyltransferase, ec:3.6.1.9 - diphosphatase, ec:2.7.1.23 - kinase, ec:1.6.1.2 - transhydrogenase (Re/Si-specific), ec:3.6.1.22 - diphosphatase, ec:3.1.3.5 - uridine 5'-nucleotidase, ec:1.2.1.24 - dehydrogenase (NAD+), ec:2.4.2.12 - phosphoribosyltransferase, ec:3.2.2.6 - cyclase/cyclic ADP-ribose hydrolase, ec:1.2.1.16 - dehydrogenase [NAD…
TRINITY_DN607_c0_g1_i1	T cell receptor signaling pathway, PD-L1 expression and PD-1 checkpoint pathway in cancer, Th1 and Th2 cell differentiation	map04660, map05235, map04658	2, 1, 1	ec:2.7.10.2 - protein-tyrosine kinase, ec:3.1.3.16 - phosphatase, ec:3.1.3.16 - phosphatase, ec:3.1.3.16 - phosphatase
TRINITY_DN3888_c0_g1_i2	Purine metabolism, Thiamine metabolism	map00230, map00730	54, 7	ec:3.6.1.15 - phosphatase, ec:4.6.1.2 - cyclase, ec:3.1.4.35 - phosphodiesterase, ec:3.5.4.10 - cyclohydrolase, ec:3.1.5.1 - deoxy-GTPase, ec:3.6.1.9 - diphosphatase, ec:3.5.4.3 - deaminase, ec:3.6.1.17 - (asymmetrical), ec:1.17.4.1 - reductase, ec:3.6.1.3 - adenylpyrophosphatase, ec:3.1.4.17 - phosphodiesterase, ec:4.3.2.2 - lyase, ec:1.7.1.7 - reductase, ec:1.17.1.4 - dehydrogenase, ec:2.7.7.4 …
TRINITY_DN1278_c0_g1_i9	Nicotinate and nicotinamide metabolism	map00760	16	ec:6.3.4.21 - phosphoribosyltransferase, ec:2.7.7.1 - adenylyltransferase, ec:3.6.1.9 - diphosphatase, ec:2.7.1.23 - kinase, ec:1.6.1.2 - transhydrogenase (Re/Si-specific), ec:3.6.1.22 - diphosphatase, ec:3.1.3.5 - uridine 5'-nucleotidase, ec:1.2.1.24 - dehydrogenase (NAD+), ec:2.4.2.12 - phosphoribosyltransferase, ec:3.2.2.6 - cyclase/cyclic ADP-ribose hydrolase, ec:1.2.1.16 - dehydrogenase [NAD…
TRINITY_DN607_c0_g1_i7	T cell receptor signaling pathway, PD-L1 expression and PD-1 checkpoint pathway in cancer, Th1 and Th2 cell differentiation	map04660, map05235, map04658	2, 1, 1	ec:2.7.10.2 - protein-tyrosine kinase, ec:3.1.3.16 - phosphatase, ec:3.1.3.16 - phosphatase, ec:3.1.3.16 - phosphatase
TRINITY_DN607_c0_g1_i8	T cell receptor signaling pathway, PD-L1 expression and PD-1 checkpoint pathway in cancer, Th1 and Th2 cell differentiation	map04660, map05235, map04658	2, 1, 1	ec:2.7.10.2 - protein-tyrosine kinase, ec:3.1.3.16 - phosphatase, ec:3.1.3.16 - phosphatase, ec:3.1.3.16 - phosphatase
TRINITY_DN1278_c0_g1_i7	Nicotinate and nicotinamide metabolism	map00760	16	ec:6.3.4.21 - phosphoribosyltransferase, ec:2.7.7.1 - adenylyltransferase, ec:3.6.1.9 - diphosphatase, ec:2.7.1.23 - kinase, ec:1.6.1.2 - transhydrogenase (Re/Si-specific), ec:3.6.1.22 - diphosphatase, ec:3.1.3.5 - uridine 5'-nucleotidase, ec:1.2.1.24 - dehydrogenase (NAD+), ec:2.4.2.12 - phosphoribosyltransferase, ec:3.2.2.6 - cyclase/cyclic ADP-ribose hydrolase, ec:1.2.1.16 - dehydrogenase [NAD…
TRINITY_DN607_c0_g1_i9	T cell receptor signaling pathway, PD-L1 expression and PD-1 checkpoint pathway in cancer, Th1 and Th2 cell differentiation	map04660, map05235, map04658	2, 1, 1	ec:2.7.10.2 - protein-tyrosine kinase, ec:3.1.3.16 - phosphatase, ec:3.1.3.16 - phosphatase, ec:3.1.3.16 - phosphatase
TRINITY_DN13772_c0_g1_i1	Purine metabolism, Thiamine metabolism	map00230, map00730	54, 7	ec:3.6.1.15 - phosphatase, ec:4.6.1.2 - cyclase, ec:3.1.4.35 - phosphodiesterase, ec:3.5.4.10 - cyclohydrolase, ec:3.1.5.1 - deoxy-GTPase, ec:3.6.1.9 - diphosphatase, ec:3.5.4.3 - deaminase, ec:3.6.1.17 - (asymmetrical), ec:1.17.4.1 - reductase, ec:3.6.1.3 - adenylpyrophosphatase, ec:3.1.4.17 - phosphodiesterase, ec:4.3.2.2 - lyase, ec:1.7.1.7 - reductase, ec:1.17.1.4 - dehydrogenase, ec:2.7.7.4 …
TRINITY_DN3888_c0_g1_i1	Purine metabolism, Thiamine metabolism	map00230, map00730	54, 7	ec:3.6.1.15 - phosphatase, ec:4.6.1.2 - cyclase, ec:3.1.4.35 - phosphodiesterase, ec:3.5.4.10 - cyclohydrolase, ec:3.1.5.1 - deoxy-GTPase, ec:3.6.1.9 - diphosphatase, ec:3.5.4.3 - deaminase, ec:3.6.1.17 - (asymmetrical), ec:1.17.4.1 - reductase, ec:3.6.1.3 - adenylpyrophosphatase, ec:3.1.4.17 - phosphodiesterase, ec:4.3.2.2 - lyase, ec:1.7.1.7 - reductase, ec:1.17.1.4 - dehydrogenase, ec:2.7.7.4 …
TRINITY_DN47363_c0_g1_i1	Pyrimidine metabolism, Nicotinate and nicotinamide metabolism, Purine metabolism, Riboflavin metabolism, Pantothenate and CoA biosynthesis, Starch and sucrose metabolism	map00240, map00760, map00230, map00740, map00770, map00500	29, 16, 54, 7, 10, 21	ec:2.7.1.48 - kinase, ec:3.5.2.2 - hydantoinase, ec:1.3.5.2 - dehydrogenase (quinone), ec:3.6.1.9 - diphosphatase, ec:6.3.4.2 - synthase (glutamine hydrolysing), ec:2.1.1.45 - synthase, ec:3.6.1.17 - (asymmetrical), ec:1.17.4.1 - reductase, ec:2.1.3.2 - carbamoyltransferase, ec:2.4.2.10 - phosphoribosyltransferase, ec:3.6.1.12 - diphosphatase, ec:3.5.4.12 - deaminase, ec:3.6.1.23 - diphosphatase,…
TRINITY_DN30321_c0_g1_i1	Purine metabolism, Thiamine metabolism	map00230, map00730	54, 7	ec:3.6.1.15 - phosphatase, ec:4.6.1.2 - cyclase, ec:3.1.4.35 - phosphodiesterase, ec:3.5.4.10 - cyclohydrolase, ec:3.1.5.1 - deoxy-GTPase, ec:3.6.1.9 - diphosphatase, ec:3.5.4.3 - deaminase, ec:3.6.1.17 - (asymmetrical), ec:1.17.4.1 - reductase, ec:3.6.1.3 - adenylpyrophosphatase, ec:3.1.4.17 - phosphodiesterase, ec:4.3.2.2 - lyase, ec:1.7.1.7 - reductase, ec:1.17.1.4 - dehydrogenase, ec:2.7.7.4 …
TRINITY_DN2933_c0_g1_i3	Other glycan degradation	map00511	9	ec:3.2.1.45 - psychosine hydrolase, ec:3.2.1.51 - alpha-fucosidase, ec:3.2.1.23 - lactase (ambiguous), ec:3.2.1.25 - mannanase, ec:3.5.1.26 - aspartylglucosylamine deaspartylase, ec:3.2.1.96 - endo-beta-N-acetylglucosaminidase, ec:3.2.1.18 - neuraminidase, ec:3.2.1.52 - hexosaminidase, ec:3.2.1.24 - alpha-D-mannosidase
TRINITY_DN2933_c0_g1_i2	Other glycan degradation	map00511	9	ec:3.2.1.45 - psychosine hydrolase, ec:3.2.1.51 - alpha-fucosidase, ec:3.2.1.23 - lactase (ambiguous), ec:3.2.1.25 - mannanase, ec:3.5.1.26 - aspartylglucosylamine deaspartylase, ec:3.2.1.96 - endo-beta-N-acetylglucosaminidase, ec:3.2.1.18 - neuraminidase, ec:3.2.1.52 - hexosaminidase, ec:3.2.1.24 - alpha-D-mannosidase
TRINITY_DN2933_c0_g1_i1	Other glycan degradation	map00511	9	ec:3.2.1.45 - psychosine hydrolase, ec:3.2.1.51 - alpha-fucosidase, ec:3.2.1.23 - lactase (ambiguous), ec:3.2.1.25 - mannanase, ec:3.5.1.26 - aspartylglucosylamine deaspartylase, ec:3.2.1.96 - endo-beta-N-acetylglucosaminidase, ec:3.2.1.18 - neuraminidase, ec:3.2.1.52 - hexosaminidase, ec:3.2.1.24 - alpha-D-mannosidase
TRINITY_DN2396_c1_g1_i2	mTOR signaling pathway	map04150	3	ec:2.7.11.11 - protein kinase, ec:2.7.1.153 - 3-kinase, ec:2.7.11.24 - protein kinase
TRINITY_DN5501_c0_g1_i2	Oxidative phosphorylation	map00190	5	ec:3.6.1.1 - diphosphatase, ec:1.3.5.1 - dehydrogenase, ec:7.1.2.1 - H+-exporting transporter, ec:1.6.99.3 - dehydrogenase, ec:7.1.1.2 - reductase (H+-translocating)
TRINITY_DN1042_c0_g1_i6	Purine metabolism, Thiamine metabolism	map00230, map00730	54, 7	ec:3.6.1.15 - phosphatase, ec:4.6.1.2 - cyclase, ec:3.1.4.35 - phosphodiesterase, ec:3.5.4.10 - cyclohydrolase, ec:3.1.5.1 - deoxy-GTPase, ec:3.6.1.9 - diphosphatase, ec:3.5.4.3 - deaminase, ec:3.6.1.17 - (asymmetrical), ec:1.17.4.1 - reductase, ec:3.6.1.3 - adenylpyrophosphatase, ec:3.1.4.17 - phosphodiesterase, ec:4.3.2.2 - lyase, ec:1.7.1.7 - reductase, ec:1.17.1.4 - dehydrogenase, ec:2.7.7.4 …
TRINITY_DN10227_c0_g1_i1	Drug metabolism - other enzymes, Purine metabolism, Caffeine metabolism	map00983, map00230, map00232	20, 54, 3	ec:2.7.1.48 - kinase, ec:3.5.2.2 - hydantoinase, ec:3.1.1.1 - ali-esterase, ec:1.17.4.1 - reductase, ec:2.4.2.10 - phosphoribosyltransferase, ec:3.2.1.31 - beta-glucuronide glucuronohydrolase glucuronidase, ec:3.6.1.23 - diphosphatase, ec:3.5.4.5 - deaminase, ec:6.3.5.2 - synthase (glutamine-hydrolysing), ec:2.3.1.5 - N-acetyltransferase, ec:2.4.1.17 - 1-naphthol glucuronyltransferase, ec:2.4.2.8…
TRINITY_DN1042_c0_g1_i7	Purine metabolism, Thiamine metabolism	map00230, map00730	54, 7	ec:3.6.1.15 - phosphatase, ec:4.6.1.2 - cyclase, ec:3.1.4.35 - phosphodiesterase, ec:3.5.4.10 - cyclohydrolase, ec:3.1.5.1 - deoxy-GTPase, ec:3.6.1.9 - diphosphatase, ec:3.5.4.3 - deaminase, ec:3.6.1.17 - (asymmetrical), ec:1.17.4.1 - reductase, ec:3.6.1.3 - adenylpyrophosphatase, ec:3.1.4.17 - phosphodiesterase, ec:4.3.2.2 - lyase, ec:1.7.1.7 - reductase, ec:1.17.1.4 - dehydrogenase, ec:2.7.7.4 …
TRINITY_DN45181_c0_g1_i12	Purine metabolism, Thiamine metabolism	map00230, map00730	54, 7	ec:3.6.1.15 - phosphatase, ec:4.6.1.2 - cyclase, ec:3.1.4.35 - phosphodiesterase, ec:3.5.4.10 - cyclohydrolase, ec:3.1.5.1 - deoxy-GTPase, ec:3.6.1.9 - diphosphatase, ec:3.5.4.3 - deaminase, ec:3.6.1.17 - (asymmetrical), ec:1.17.4.1 - reductase, ec:3.6.1.3 - adenylpyrophosphatase, ec:3.1.4.17 - phosphodiesterase, ec:4.3.2.2 - lyase, ec:1.7.1.7 - reductase, ec:1.17.1.4 - dehydrogenase, ec:2.7.7.4 …
TRINITY_DN2933_c0_g1_i6	Other glycan degradation	map00511	9	ec:3.2.1.45 - psychosine hydrolase, ec:3.2.1.51 - alpha-fucosidase, ec:3.2.1.23 - lactase (ambiguous), ec:3.2.1.25 - mannanase, ec:3.5.1.26 - aspartylglucosylamine deaspartylase, ec:3.2.1.96 - endo-beta-N-acetylglucosaminidase, ec:3.2.1.18 - neuraminidase, ec:3.2.1.52 - hexosaminidase, ec:3.2.1.24 - alpha-D-mannosidase
TRINITY_DN1042_c0_g1_i8	Purine metabolism, Thiamine metabolism	map00230, map00730	54, 7	ec:3.6.1.15 - phosphatase, ec:4.6.1.2 - cyclase, ec:3.1.4.35 - phosphodiesterase, ec:3.5.4.10 - cyclohydrolase, ec:3.1.5.1 - deoxy-GTPase, ec:3.6.1.9 - diphosphatase, ec:3.5.4.3 - deaminase, ec:3.6.1.17 - (asymmetrical), ec:1.17.4.1 - reductase, ec:3.6.1.3 - adenylpyrophosphatase, ec:3.1.4.17 - phosphodiesterase, ec:4.3.2.2 - lyase, ec:1.7.1.7 - reductase, ec:1.17.1.4 - dehydrogenase, ec:2.7.7.4 …
TRINITY_DN5501_c0_g1_i5	Oxidative phosphorylation	map00190	5	ec:3.6.1.1 - diphosphatase, ec:1.3.5.1 - dehydrogenase, ec:7.1.2.1 - H+-exporting transporter, ec:1.6.99.3 - dehydrogenase, ec:7.1.1.2 - reductase (H+-translocating)
TRINITY_DN1042_c0_g1_i9	Purine metabolism, Thiamine metabolism	map00230, map00730	54, 7	ec:3.6.1.15 - phosphatase, ec:4.6.1.2 - cyclase, ec:3.1.4.35 - phosphodiesterase, ec:3.5.4.10 - cyclohydrolase, ec:3.1.5.1 - deoxy-GTPase, ec:3.6.1.9 - diphosphatase, ec:3.5.4.3 - deaminase, ec:3.6.1.17 - (asymmetrical), ec:1.17.4.1 - reductase, ec:3.6.1.3 - adenylpyrophosphatase, ec:3.1.4.17 - phosphodiesterase, ec:4.3.2.2 - lyase, ec:1.7.1.7 - reductase, ec:1.17.1.4 - dehydrogenase, ec:2.7.7.4 …
TRINITY_DN1042_c0_g1_i2	Purine metabolism, Thiamine metabolism	map00230, map00730	54, 7	ec:3.6.1.15 - phosphatase, ec:4.6.1.2 - cyclase, ec:3.1.4.35 - phosphodiesterase, ec:3.5.4.10 - cyclohydrolase, ec:3.1.5.1 - deoxy-GTPase, ec:3.6.1.9 - diphosphatase, ec:3.5.4.3 - deaminase, ec:3.6.1.17 - (asymmetrical), ec:1.17.4.1 - reductase, ec:3.6.1.3 - adenylpyrophosphatase, ec:3.1.4.17 - phosphodiesterase, ec:4.3.2.2 - lyase, ec:1.7.1.7 - reductase, ec:1.17.1.4 - dehydrogenase, ec:2.7.7.4 …
TRINITY_DN1042_c0_g1_i3	Purine metabolism, Thiamine metabolism	map00230, map00730	54, 7	ec:3.6.1.15 - phosphatase, ec:4.6.1.2 - cyclase, ec:3.1.4.35 - phosphodiesterase, ec:3.5.4.10 - cyclohydrolase, ec:3.1.5.1 - deoxy-GTPase, ec:3.6.1.9 - diphosphatase, ec:3.5.4.3 - deaminase, ec:3.6.1.17 - (asymmetrical), ec:1.17.4.1 - reductase, ec:3.6.1.3 - adenylpyrophosphatase, ec:3.1.4.17 - phosphodiesterase, ec:4.3.2.2 - lyase, ec:1.7.1.7 - reductase, ec:1.17.1.4 - dehydrogenase, ec:2.7.7.4 …
TRINITY_DN1042_c0_g1_i5	Purine metabolism, Thiamine metabolism	map00230, map00730	54, 7	ec:3.6.1.15 - phosphatase, ec:4.6.1.2 - cyclase, ec:3.1.4.35 - phosphodiesterase, ec:3.5.4.10 - cyclohydrolase, ec:3.1.5.1 - deoxy-GTPase, ec:3.6.1.9 - diphosphatase, ec:3.5.4.3 - deaminase, ec:3.6.1.17 - (asymmetrical), ec:1.17.4.1 - reductase, ec:3.6.1.3 - adenylpyrophosphatase, ec:3.1.4.17 - phosphodiesterase, ec:4.3.2.2 - lyase, ec:1.7.1.7 - reductase, ec:1.17.1.4 - dehydrogenase, ec:2.7.7.4 …
TRINITY_DN45181_c0_g1_i14	Purine metabolism, Thiamine metabolism	map00230, map00730	54, 7	ec:3.6.1.15 - phosphatase, ec:4.6.1.2 - cyclase, ec:3.1.4.35 - phosphodiesterase, ec:3.5.4.10 - cyclohydrolase, ec:3.1.5.1 - deoxy-GTPase, ec:3.6.1.9 - diphosphatase, ec:3.5.4.3 - deaminase, ec:3.6.1.17 - (asymmetrical), ec:1.17.4.1 - reductase, ec:3.6.1.3 - adenylpyrophosphatase, ec:3.1.4.17 - phosphodiesterase, ec:4.3.2.2 - lyase, ec:1.7.1.7 - reductase, ec:1.17.1.4 - dehydrogenase, ec:2.7.7.4 …
TRINITY_DN7206_c0_g1_i24	Purine metabolism, Thiamine metabolism	map00230, map00730	54, 7	ec:3.6.1.15 - phosphatase, ec:4.6.1.2 - cyclase, ec:3.1.4.35 - phosphodiesterase, ec:3.5.4.10 - cyclohydrolase, ec:3.1.5.1 - deoxy-GTPase, ec:3.6.1.9 - diphosphatase, ec:3.5.4.3 - deaminase, ec:3.6.1.17 - (asymmetrical), ec:1.17.4.1 - reductase, ec:3.6.1.3 - adenylpyrophosphatase, ec:3.1.4.17 - phosphodiesterase, ec:4.3.2.2 - lyase, ec:1.7.1.7 - reductase, ec:1.17.1.4 - dehydrogenase, ec:2.7.7.4 …
TRINITY_DN170339_c0_g1_i1	Purine metabolism, Thiamine metabolism	map00230, map00730	54, 7	ec:3.6.1.15 - phosphatase, ec:4.6.1.2 - cyclase, ec:3.1.4.35 - phosphodiesterase, ec:3.5.4.10 - cyclohydrolase, ec:3.1.5.1 - deoxy-GTPase, ec:3.6.1.9 - diphosphatase, ec:3.5.4.3 - deaminase, ec:3.6.1.17 - (asymmetrical), ec:1.17.4.1 - reductase, ec:3.6.1.3 - adenylpyrophosphatase, ec:3.1.4.17 - phosphodiesterase, ec:4.3.2.2 - lyase, ec:1.7.1.7 - reductase, ec:1.17.1.4 - dehydrogenase, ec:2.7.7.4 …
TRINITY_DN7206_c0_g1_i25	Purine metabolism, Thiamine metabolism	map00230, map00730	54, 7	ec:3.6.1.15 - phosphatase, ec:4.6.1.2 - cyclase, ec:3.1.4.35 - phosphodiesterase, ec:3.5.4.10 - cyclohydrolase, ec:3.1.5.1 - deoxy-GTPase, ec:3.6.1.9 - diphosphatase, ec:3.5.4.3 - deaminase, ec:3.6.1.17 - (asymmetrical), ec:1.17.4.1 - reductase, ec:3.6.1.3 - adenylpyrophosphatase, ec:3.1.4.17 - phosphodiesterase, ec:4.3.2.2 - lyase, ec:1.7.1.7 - reductase, ec:1.17.1.4 - dehydrogenase, ec:2.7.7.4 …
TRINITY_DN7206_c0_g1_i26	Purine metabolism, Thiamine metabolism	map00230, map00730	54, 7	ec:3.6.1.15 - phosphatase, ec:4.6.1.2 - cyclase, ec:3.1.4.35 - phosphodiesterase, ec:3.5.4.10 - cyclohydrolase, ec:3.1.5.1 - deoxy-GTPase, ec:3.6.1.9 - diphosphatase, ec:3.5.4.3 - deaminase, ec:3.6.1.17 - (asymmetrical), ec:1.17.4.1 - reductase, ec:3.6.1.3 - adenylpyrophosphatase, ec:3.1.4.17 - phosphodiesterase, ec:4.3.2.2 - lyase, ec:1.7.1.7 - reductase, ec:1.17.1.4 - dehydrogenase, ec:2.7.7.4 …
TRINITY_DN5501_c0_g1_i7	Oxidative phosphorylation	map00190	5	ec:3.6.1.1 - diphosphatase, ec:1.3.5.1 - dehydrogenase, ec:7.1.2.1 - H+-exporting transporter, ec:1.6.99.3 - dehydrogenase, ec:7.1.1.2 - reductase (H+-translocating)
TRINITY_DN5501_c0_g1_i9	Oxidative phosphorylation	map00190	5	ec:3.6.1.1 - diphosphatase, ec:1.3.5.1 - dehydrogenase, ec:7.1.2.1 - H+-exporting transporter, ec:1.6.99.3 - dehydrogenase, ec:7.1.1.2 - reductase (H+-translocating)
TRINITY_DN7206_c0_g1_i20	Purine metabolism, Thiamine metabolism	map00230, map00730	54, 7	ec:3.6.1.15 - phosphatase, ec:4.6.1.2 - cyclase, ec:3.1.4.35 - phosphodiesterase, ec:3.5.4.10 - cyclohydrolase, ec:3.1.5.1 - deoxy-GTPase, ec:3.6.1.9 - diphosphatase, ec:3.5.4.3 - deaminase, ec:3.6.1.17 - (asymmetrical), ec:1.17.4.1 - reductase, ec:3.6.1.3 - adenylpyrophosphatase, ec:3.1.4.17 - phosphodiesterase, ec:4.3.2.2 - lyase, ec:1.7.1.7 - reductase, ec:1.17.1.4 - dehydrogenase, ec:2.7.7.4 …
TRINITY_DN7206_c0_g1_i21	Purine metabolism, Thiamine metabolism	map00230, map00730	54, 7	ec:3.6.1.15 - phosphatase, ec:4.6.1.2 - cyclase, ec:3.1.4.35 - phosphodiesterase, ec:3.5.4.10 - cyclohydrolase, ec:3.1.5.1 - deoxy-GTPase, ec:3.6.1.9 - diphosphatase, ec:3.5.4.3 - deaminase, ec:3.6.1.17 - (asymmetrical), ec:1.17.4.1 - reductase, ec:3.6.1.3 - adenylpyrophosphatase, ec:3.1.4.17 - phosphodiesterase, ec:4.3.2.2 - lyase, ec:1.7.1.7 - reductase, ec:1.17.1.4 - dehydrogenase, ec:2.7.7.4 …
TRINITY_DN7206_c0_g1_i22	Purine metabolism, Thiamine metabolism	map00230, map00730	54, 7	ec:3.6.1.15 - phosphatase, ec:4.6.1.2 - cyclase, ec:3.1.4.35 - phosphodiesterase, ec:3.5.4.10 - cyclohydrolase, ec:3.1.5.1 - deoxy-GTPase, ec:3.6.1.9 - diphosphatase, ec:3.5.4.3 - deaminase, ec:3.6.1.17 - (asymmetrical), ec:1.17.4.1 - reductase, ec:3.6.1.3 - adenylpyrophosphatase, ec:3.1.4.17 - phosphodiesterase, ec:4.3.2.2 - lyase, ec:1.7.1.7 - reductase, ec:1.17.1.4 - dehydrogenase, ec:2.7.7.4 …
TRINITY_DN4233_c5_g1_i1	Carbon fixation pathways in prokaryotes, Citrate cycle (TCA cycle)	map00720, map00020	21, 17	ec:1.1.1.35 - dehydrogenase, ec:6.2.1.1 - ligase, ec:6.4.1.3 - carboxylase, ec:4.1.3.25 - lyase, ec:1.5.1.5 - dehydrogenase (NADP+), ec:1.1.1.37 - dehydrogenase, ec:1.1.1.42 - dehydrogenase (NADP+), ec:6.2.1.5 - ligase (ADP-forming), ec:5.1.99.1 - epimerase, ec:1.3.5.1 - dehydrogenase, ec:6.4.1.2 - carboxylase, ec:2.3.3.8 - citrate synthase, ec:1.5.1.20 - reductase [NAD(P)H], ec:5.4.99.2 - mutase…
TRINITY_DN1363_c0_g1_i22	Aminoacyl-tRNA biosynthesis	map00970	22	ec:6.1.1.22 - ligase, ec:6.1.1.19 - ligase, ec:2.1.2.9 - formyltransferase, ec:6.1.1.9 - ligase, ec:6.1.1.3 - ligase, ec:6.1.1.15 - ligase, ec:6.1.1.5 - ligase, ec:6.1.1.10 - ligase, ec:6.1.1.21 - ligase, ec:6.1.1.18 - ligase, ec:6.1.1.7 - ligase, ec:6.1.1.12 - ligase, ec:6.1.1.2 - ligase, ec:6.3.5.7 - synthase (glutamine-hydrolysing), ec:6.1.1.14 - ligase, ec:6.1.1.4 - ligase, ec:6.1.1.20 - liga…
TRINITY_DN3217_c0_g1_i1	Drug metabolism - other enzymes, Nitrotoluene degradation, Caffeine metabolism	map00983, map00633, map00232	20, 1, 3	ec:2.7.1.48 - kinase, ec:3.5.2.2 - hydantoinase, ec:3.1.1.1 - ali-esterase, ec:1.17.4.1 - reductase, ec:2.4.2.10 - phosphoribosyltransferase, ec:3.2.1.31 - beta-glucuronide glucuronohydrolase glucuronidase, ec:3.6.1.23 - diphosphatase, ec:3.5.4.5 - deaminase, ec:6.3.5.2 - synthase (glutamine-hydrolysing), ec:2.3.1.5 - N-acetyltransferase, ec:2.4.1.17 - 1-naphthol glucuronyltransferase, ec:2.4.2.8…
TRINITY_DN6508_c0_g1_i4	Purine metabolism, Thiamine metabolism	map00230, map00730	54, 7	ec:3.6.1.15 - phosphatase, ec:4.6.1.2 - cyclase, ec:3.1.4.35 - phosphodiesterase, ec:3.5.4.10 - cyclohydrolase, ec:3.1.5.1 - deoxy-GTPase, ec:3.6.1.9 - diphosphatase, ec:3.5.4.3 - deaminase, ec:3.6.1.17 - (asymmetrical), ec:1.17.4.1 - reductase, ec:3.6.1.3 - adenylpyrophosphatase, ec:3.1.4.17 - phosphodiesterase, ec:4.3.2.2 - lyase, ec:1.7.1.7 - reductase, ec:1.17.1.4 - dehydrogenase, ec:2.7.7.4 …
TRINITY_DN77252_c0_g1_i1	Porphyrin and chlorophyll metabolism	map00860	19	ec:4.99.1.1 - ferrochelatase, ec:2.3.1.37 - synthase, ec:4.2.1.75 - synthase, ec:1.3.1.24 - reductase, ec:1.14.14.18 - oxygenase (biliverdin-producing), ec:2.5.1.17 - adenosyltransferase, ec:1.3.3.4 - oxidase, ec:1.3.3.3 - oxidase, ec:3.2.1.31 - beta-glucuronide glucuronohydrolase glucuronidase, ec:2.5.1.61 - synthase, ec:4.1.1.37 - decarboxylase, ec:2.4.1.17 - 1-naphthol glucuronyltransferase, e…
TRINITY_DN1363_c0_g1_i21	Aminoacyl-tRNA biosynthesis	map00970	22	ec:6.1.1.22 - ligase, ec:6.1.1.19 - ligase, ec:2.1.2.9 - formyltransferase, ec:6.1.1.9 - ligase, ec:6.1.1.3 - ligase, ec:6.1.1.15 - ligase, ec:6.1.1.5 - ligase, ec:6.1.1.10 - ligase, ec:6.1.1.21 - ligase, ec:6.1.1.18 - ligase, ec:6.1.1.7 - ligase, ec:6.1.1.12 - ligase, ec:6.1.1.2 - ligase, ec:6.3.5.7 - synthase (glutamine-hydrolysing), ec:6.1.1.14 - ligase, ec:6.1.1.4 - ligase, ec:6.1.1.20 - liga…
TRINITY_DN3217_c0_g1_i8	Drug metabolism - other enzymes, Nitrotoluene degradation, Caffeine metabolism	map00983, map00633, map00232	20, 1, 3	ec:2.7.1.48 - kinase, ec:3.5.2.2 - hydantoinase, ec:3.1.1.1 - ali-esterase, ec:1.17.4.1 - reductase, ec:2.4.2.10 - phosphoribosyltransferase, ec:3.2.1.31 - beta-glucuronide glucuronohydrolase glucuronidase, ec:3.6.1.23 - diphosphatase, ec:3.5.4.5 - deaminase, ec:6.3.5.2 - synthase (glutamine-hydrolysing), ec:2.3.1.5 - N-acetyltransferase, ec:2.4.1.17 - 1-naphthol glucuronyltransferase, ec:2.4.2.8…
TRINITY_DN54264_c0_g1_i5	Terpenoid backbone biosynthesis	map00900	16	ec:2.7.4.2 - kinase, ec:2.5.1.84 - diphosphate synthase [geranyl-diphosphate specific], ec:1.8.3.5 - oxidase, ec:2.3.3.10 - synthase, ec:2.5.1.58 - farnesyltransferase, ec:2.7.1.36 - kinase, ec:1.1.1.34 - reductase (NADPH), ec:2.1.1.100 - O-methyltransferase, ec:4.1.1.33 - decarboxylase, ec:2.5.1.10 - diphosphate synthase, ec:2.5.1.85 - diphosphate synthase [geranylgeranyl-diphosphate specific], …
TRINITY_DN54264_c0_g1_i2	Terpenoid backbone biosynthesis	map00900	16	ec:2.7.4.2 - kinase, ec:2.5.1.84 - diphosphate synthase [geranyl-diphosphate specific], ec:1.8.3.5 - oxidase, ec:2.3.3.10 - synthase, ec:2.5.1.58 - farnesyltransferase, ec:2.7.1.36 - kinase, ec:1.1.1.34 - reductase (NADPH), ec:2.1.1.100 - O-methyltransferase, ec:4.1.1.33 - decarboxylase, ec:2.5.1.10 - diphosphate synthase, ec:2.5.1.85 - diphosphate synthase [geranylgeranyl-diphosphate specific], …
TRINITY_DN3217_c0_g1_i7	Drug metabolism - other enzymes, Nitrotoluene degradation, Caffeine metabolism	map00983, map00633, map00232	20, 1, 3	ec:2.7.1.48 - kinase, ec:3.5.2.2 - hydantoinase, ec:3.1.1.1 - ali-esterase, ec:1.17.4.1 - reductase, ec:2.4.2.10 - phosphoribosyltransferase, ec:3.2.1.31 - beta-glucuronide glucuronohydrolase glucuronidase, ec:3.6.1.23 - diphosphatase, ec:3.5.4.5 - deaminase, ec:6.3.5.2 - synthase (glutamine-hydrolysing), ec:2.3.1.5 - N-acetyltransferase, ec:2.4.1.17 - 1-naphthol glucuronyltransferase, ec:2.4.2.8…
TRINITY_DN54264_c0_g1_i3	Terpenoid backbone biosynthesis	map00900	16	ec:2.7.4.2 - kinase, ec:2.5.1.84 - diphosphate synthase [geranyl-diphosphate specific], ec:1.8.3.5 - oxidase, ec:2.3.3.10 - synthase, ec:2.5.1.58 - farnesyltransferase, ec:2.7.1.36 - kinase, ec:1.1.1.34 - reductase (NADPH), ec:2.1.1.100 - O-methyltransferase, ec:4.1.1.33 - decarboxylase, ec:2.5.1.10 - diphosphate synthase, ec:2.5.1.85 - diphosphate synthase [geranylgeranyl-diphosphate specific], …
TRINITY_DN3217_c0_g1_i4	Drug metabolism - other enzymes, Nitrotoluene degradation, Caffeine metabolism	map00983, map00633, map00232	20, 1, 3	ec:2.7.1.48 - kinase, ec:3.5.2.2 - hydantoinase, ec:3.1.1.1 - ali-esterase, ec:1.17.4.1 - reductase, ec:2.4.2.10 - phosphoribosyltransferase, ec:3.2.1.31 - beta-glucuronide glucuronohydrolase glucuronidase, ec:3.6.1.23 - diphosphatase, ec:3.5.4.5 - deaminase, ec:6.3.5.2 - synthase (glutamine-hydrolysing), ec:2.3.1.5 - N-acetyltransferase, ec:2.4.1.17 - 1-naphthol glucuronyltransferase, ec:2.4.2.8…
TRINITY_DN6508_c0_g1_i1	Purine metabolism, Thiamine metabolism	map00230, map00730	54, 7	ec:3.6.1.15 - phosphatase, ec:4.6.1.2 - cyclase, ec:3.1.4.35 - phosphodiesterase, ec:3.5.4.10 - cyclohydrolase, ec:3.1.5.1 - deoxy-GTPase, ec:3.6.1.9 - diphosphatase, ec:3.5.4.3 - deaminase, ec:3.6.1.17 - (asymmetrical), ec:1.17.4.1 - reductase, ec:3.6.1.3 - adenylpyrophosphatase, ec:3.1.4.17 - phosphodiesterase, ec:4.3.2.2 - lyase, ec:1.7.1.7 - reductase, ec:1.17.1.4 - dehydrogenase, ec:2.7.7.4 …
TRINITY_DN3217_c0_g1_i5	Drug metabolism - other enzymes, Nitrotoluene degradation, Caffeine metabolism	map00983, map00633, map00232	20, 1, 3	ec:2.7.1.48 - kinase, ec:3.5.2.2 - hydantoinase, ec:3.1.1.1 - ali-esterase, ec:1.17.4.1 - reductase, ec:2.4.2.10 - phosphoribosyltransferase, ec:3.2.1.31 - beta-glucuronide glucuronohydrolase glucuronidase, ec:3.6.1.23 - diphosphatase, ec:3.5.4.5 - deaminase, ec:6.3.5.2 - synthase (glutamine-hydrolysing), ec:2.3.1.5 - N-acetyltransferase, ec:2.4.1.17 - 1-naphthol glucuronyltransferase, ec:2.4.2.8…
TRINITY_DN3217_c0_g1_i2	Drug metabolism - other enzymes, Nitrotoluene degradation, Caffeine metabolism	map00983, map00633, map00232	20, 1, 3	ec:2.7.1.48 - kinase, ec:3.5.2.2 - hydantoinase, ec:3.1.1.1 - ali-esterase, ec:1.17.4.1 - reductase, ec:2.4.2.10 - phosphoribosyltransferase, ec:3.2.1.31 - beta-glucuronide glucuronohydrolase glucuronidase, ec:3.6.1.23 - diphosphatase, ec:3.5.4.5 - deaminase, ec:6.3.5.2 - synthase (glutamine-hydrolysing), ec:2.3.1.5 - N-acetyltransferase, ec:2.4.1.17 - 1-naphthol glucuronyltransferase, ec:2.4.2.8…
TRINITY_DN20276_c0_g1_i2	Purine metabolism	map00230	54	ec:3.6.1.15 - phosphatase, ec:4.6.1.2 - cyclase, ec:3.1.4.35 - phosphodiesterase, ec:3.5.4.10 - cyclohydrolase, ec:3.1.5.1 - deoxy-GTPase, ec:3.6.1.9 - diphosphatase, ec:3.5.4.3 - deaminase, ec:3.6.1.17 - (asymmetrical), ec:1.17.4.1 - reductase, ec:3.6.1.3 - adenylpyrophosphatase, ec:3.1.4.17 - phosphodiesterase, ec:4.3.2.2 - lyase, ec:1.7.1.7 - reductase, ec:1.17.1.4 - dehydrogenase, ec:2.7.7.4 …
TRINITY_DN9940_c1_g1_i11	Sphingolipid metabolism, Galactose metabolism, Glycosaminoglycan degradation, Glycosphingolipid biosynthesis - ganglio series, Other glycan degradation	map00600, map00052, map00531, map00604, map00511	18, 19, 11, 5, 9	ec:2.7.1.138 - kinase, ec:3.2.1.45 - psychosine hydrolase, ec:2.7.8.27 - synthase, ec:3.1.4.12 - phosphodiesterase, ec:3.1.6.1 - sulfatase, ec:3.2.1.23 - lactase (ambiguous), ec:3.2.1.22 - melibiase, ec:2.3.1.50 - C-palmitoyltransferase, ec:3.5.1.23 - acylsphingosine deacylase, ec:3.2.1.46 - cerebroside galactosidase, ec:2.3.1.24 - N-acyltransferase, ec:3.1.4.41 - phosphodiesterase D, ec:3.1.3.4 …
TRINITY_DN6905_c0_g1_i1	Pyrimidine metabolism, Nicotinate and nicotinamide metabolism, Purine metabolism, Riboflavin metabolism, Pantothenate and CoA biosynthesis, Starch and sucrose metabolism	map00240, map00760, map00230, map00740, map00770, map00500	29, 16, 54, 7, 10, 21	ec:2.7.1.48 - kinase, ec:3.5.2.2 - hydantoinase, ec:1.3.5.2 - dehydrogenase (quinone), ec:3.6.1.9 - diphosphatase, ec:6.3.4.2 - synthase (glutamine hydrolysing), ec:2.1.1.45 - synthase, ec:3.6.1.17 - (asymmetrical), ec:1.17.4.1 - reductase, ec:2.1.3.2 - carbamoyltransferase, ec:2.4.2.10 - phosphoribosyltransferase, ec:3.6.1.12 - diphosphatase, ec:3.5.4.12 - deaminase, ec:3.6.1.23 - diphosphatase,…
TRINITY_DN20276_c0_g1_i8	Purine metabolism	map00230	54	ec:3.6.1.15 - phosphatase, ec:4.6.1.2 - cyclase, ec:3.1.4.35 - phosphodiesterase, ec:3.5.4.10 - cyclohydrolase, ec:3.1.5.1 - deoxy-GTPase, ec:3.6.1.9 - diphosphatase, ec:3.5.4.3 - deaminase, ec:3.6.1.17 - (asymmetrical), ec:1.17.4.1 - reductase, ec:3.6.1.3 - adenylpyrophosphatase, ec:3.1.4.17 - phosphodiesterase, ec:4.3.2.2 - lyase, ec:1.7.1.7 - reductase, ec:1.17.1.4 - dehydrogenase, ec:2.7.7.4 …
TRINITY_DN20276_c0_g1_i9	Purine metabolism	map00230	54	ec:3.6.1.15 - phosphatase, ec:4.6.1.2 - cyclase, ec:3.1.4.35 - phosphodiesterase, ec:3.5.4.10 - cyclohydrolase, ec:3.1.5.1 - deoxy-GTPase, ec:3.6.1.9 - diphosphatase, ec:3.5.4.3 - deaminase, ec:3.6.1.17 - (asymmetrical), ec:1.17.4.1 - reductase, ec:3.6.1.3 - adenylpyrophosphatase, ec:3.1.4.17 - phosphodiesterase, ec:4.3.2.2 - lyase, ec:1.7.1.7 - reductase, ec:1.17.1.4 - dehydrogenase, ec:2.7.7.4 …
TRINITY_DN684_c3_g2_i4	beta-Lactam resistance, Penicillin and cephalosporin biosynthesis	map01501, map00311	1, 2	ec:3.5.2.6 - penicillinase, ec:1.4.3.3 - oxidase, ec:3.5.2.6 - penicillinase
TRINITY_DN53589_c3_g1_i1	Pentose phosphate pathway	map00030	17	ec:5.1.3.1 - 3-epimerase, ec:2.7.1.12 - gluconokinase (phosphorylating), ec:5.4.2.2 - (alpha-D-glucose-1,6-bisphosphate-dependent), ec:2.7.1.11 - phosphohexokinase, ec:2.2.1.2 - dihydroxyacetonetransferase, ec:5.3.1.9 - isomerase, ec:4.1.2.4 - aldolase, ec:1.1.1.44 - dehydrogenase (NADP+-dependent, decarboxylating), ec:3.1.3.11 - hexose diphosphatase, ec:5.4.2.7 - phosphodeoxyribomutase, ec:5.3.1…
TRINITY_DN20276_c0_g1_i5	Purine metabolism	map00230	54	ec:3.6.1.15 - phosphatase, ec:4.6.1.2 - cyclase, ec:3.1.4.35 - phosphodiesterase, ec:3.5.4.10 - cyclohydrolase, ec:3.1.5.1 - deoxy-GTPase, ec:3.6.1.9 - diphosphatase, ec:3.5.4.3 - deaminase, ec:3.6.1.17 - (asymmetrical), ec:1.17.4.1 - reductase, ec:3.6.1.3 - adenylpyrophosphatase, ec:3.1.4.17 - phosphodiesterase, ec:4.3.2.2 - lyase, ec:1.7.1.7 - reductase, ec:1.17.1.4 - dehydrogenase, ec:2.7.7.4 …
TRINITY_DN27793_c0_g1_i5	Purine metabolism	map00230	54	ec:3.6.1.15 - phosphatase, ec:4.6.1.2 - cyclase, ec:3.1.4.35 - phosphodiesterase, ec:3.5.4.10 - cyclohydrolase, ec:3.1.5.1 - deoxy-GTPase, ec:3.6.1.9 - diphosphatase, ec:3.5.4.3 - deaminase, ec:3.6.1.17 - (asymmetrical), ec:1.17.4.1 - reductase, ec:3.6.1.3 - adenylpyrophosphatase, ec:3.1.4.17 - phosphodiesterase, ec:4.3.2.2 - lyase, ec:1.7.1.7 - reductase, ec:1.17.1.4 - dehydrogenase, ec:2.7.7.4 …
TRINITY_DN6765_c1_g1_i7	Drug metabolism - other enzymes, Nitrotoluene degradation, Caffeine metabolism	map00983, map00633, map00232	20, 1, 3	ec:2.7.1.48 - kinase, ec:3.5.2.2 - hydantoinase, ec:3.1.1.1 - ali-esterase, ec:1.17.4.1 - reductase, ec:2.4.2.10 - phosphoribosyltransferase, ec:3.2.1.31 - beta-glucuronide glucuronohydrolase glucuronidase, ec:3.6.1.23 - diphosphatase, ec:3.5.4.5 - deaminase, ec:6.3.5.2 - synthase (glutamine-hydrolysing), ec:2.3.1.5 - N-acetyltransferase, ec:2.4.1.17 - 1-naphthol glucuronyltransferase, ec:2.4.2.8…
TRINITY_DN6765_c1_g1_i6	Drug metabolism - other enzymes, Nitrotoluene degradation, Caffeine metabolism	map00983, map00633, map00232	20, 1, 3	ec:2.7.1.48 - kinase, ec:3.5.2.2 - hydantoinase, ec:3.1.1.1 - ali-esterase, ec:1.17.4.1 - reductase, ec:2.4.2.10 - phosphoribosyltransferase, ec:3.2.1.31 - beta-glucuronide glucuronohydrolase glucuronidase, ec:3.6.1.23 - diphosphatase, ec:3.5.4.5 - deaminase, ec:6.3.5.2 - synthase (glutamine-hydrolysing), ec:2.3.1.5 - N-acetyltransferase, ec:2.4.1.17 - 1-naphthol glucuronyltransferase, ec:2.4.2.8…
TRINITY_DN5411_c0_g1_i9	Aminoacyl-tRNA biosynthesis	map00970	22	ec:6.1.1.22 - ligase, ec:6.1.1.19 - ligase, ec:2.1.2.9 - formyltransferase, ec:6.1.1.9 - ligase, ec:6.1.1.3 - ligase, ec:6.1.1.15 - ligase, ec:6.1.1.5 - ligase, ec:6.1.1.10 - ligase, ec:6.1.1.21 - ligase, ec:6.1.1.18 - ligase, ec:6.1.1.7 - ligase, ec:6.1.1.12 - ligase, ec:6.1.1.2 - ligase, ec:6.3.5.7 - synthase (glutamine-hydrolysing), ec:6.1.1.14 - ligase, ec:6.1.1.4 - ligase, ec:6.1.1.20 - liga…
TRINITY_DN5411_c0_g1_i8	Aminoacyl-tRNA biosynthesis	map00970	22	ec:6.1.1.22 - ligase, ec:6.1.1.19 - ligase, ec:2.1.2.9 - formyltransferase, ec:6.1.1.9 - ligase, ec:6.1.1.3 - ligase, ec:6.1.1.15 - ligase, ec:6.1.1.5 - ligase, ec:6.1.1.10 - ligase, ec:6.1.1.21 - ligase, ec:6.1.1.18 - ligase, ec:6.1.1.7 - ligase, ec:6.1.1.12 - ligase, ec:6.1.1.2 - ligase, ec:6.3.5.7 - synthase (glutamine-hydrolysing), ec:6.1.1.14 - ligase, ec:6.1.1.4 - ligase, ec:6.1.1.20 - liga…
TRINITY_DN5411_c0_g1_i7	Aminoacyl-tRNA biosynthesis	map00970	22	ec:6.1.1.22 - ligase, ec:6.1.1.19 - ligase, ec:2.1.2.9 - formyltransferase, ec:6.1.1.9 - ligase, ec:6.1.1.3 - ligase, ec:6.1.1.15 - ligase, ec:6.1.1.5 - ligase, ec:6.1.1.10 - ligase, ec:6.1.1.21 - ligase, ec:6.1.1.18 - ligase, ec:6.1.1.7 - ligase, ec:6.1.1.12 - ligase, ec:6.1.1.2 - ligase, ec:6.3.5.7 - synthase (glutamine-hydrolysing), ec:6.1.1.14 - ligase, ec:6.1.1.4 - ligase, ec:6.1.1.20 - liga…
TRINITY_DN5411_c0_g1_i6	Aminoacyl-tRNA biosynthesis	map00970	22	ec:6.1.1.22 - ligase, ec:6.1.1.19 - ligase, ec:2.1.2.9 - formyltransferase, ec:6.1.1.9 - ligase, ec:6.1.1.3 - ligase, ec:6.1.1.15 - ligase, ec:6.1.1.5 - ligase, ec:6.1.1.10 - ligase, ec:6.1.1.21 - ligase, ec:6.1.1.18 - ligase, ec:6.1.1.7 - ligase, ec:6.1.1.12 - ligase, ec:6.1.1.2 - ligase, ec:6.3.5.7 - synthase (glutamine-hydrolysing), ec:6.1.1.14 - ligase, ec:6.1.1.4 - ligase, ec:6.1.1.20 - liga…
TRINITY_DN5411_c0_g1_i5	Aminoacyl-tRNA biosynthesis	map00970	22	ec:6.1.1.22 - ligase, ec:6.1.1.19 - ligase, ec:2.1.2.9 - formyltransferase, ec:6.1.1.9 - ligase, ec:6.1.1.3 - ligase, ec:6.1.1.15 - ligase, ec:6.1.1.5 - ligase, ec:6.1.1.10 - ligase, ec:6.1.1.21 - ligase, ec:6.1.1.18 - ligase, ec:6.1.1.7 - ligase, ec:6.1.1.12 - ligase, ec:6.1.1.2 - ligase, ec:6.3.5.7 - synthase (glutamine-hydrolysing), ec:6.1.1.14 - ligase, ec:6.1.1.4 - ligase, ec:6.1.1.20 - liga…
TRINITY_DN6765_c1_g1_i8	Drug metabolism - other enzymes, Nitrotoluene degradation, Caffeine metabolism	map00983, map00633, map00232	20, 1, 3	ec:2.7.1.48 - kinase, ec:3.5.2.2 - hydantoinase, ec:3.1.1.1 - ali-esterase, ec:1.17.4.1 - reductase, ec:2.4.2.10 - phosphoribosyltransferase, ec:3.2.1.31 - beta-glucuronide glucuronohydrolase glucuronidase, ec:3.6.1.23 - diphosphatase, ec:3.5.4.5 - deaminase, ec:6.3.5.2 - synthase (glutamine-hydrolysing), ec:2.3.1.5 - N-acetyltransferase, ec:2.4.1.17 - 1-naphthol glucuronyltransferase, ec:2.4.2.8…
TRINITY_DN5411_c0_g1_i4	Aminoacyl-tRNA biosynthesis	map00970	22	ec:6.1.1.22 - ligase, ec:6.1.1.19 - ligase, ec:2.1.2.9 - formyltransferase, ec:6.1.1.9 - ligase, ec:6.1.1.3 - ligase, ec:6.1.1.15 - ligase, ec:6.1.1.5 - ligase, ec:6.1.1.10 - ligase, ec:6.1.1.21 - ligase, ec:6.1.1.18 - ligase, ec:6.1.1.7 - ligase, ec:6.1.1.12 - ligase, ec:6.1.1.2 - ligase, ec:6.3.5.7 - synthase (glutamine-hydrolysing), ec:6.1.1.14 - ligase, ec:6.1.1.4 - ligase, ec:6.1.1.20 - liga…
TRINITY_DN1585_c0_g1_i1	Glycerophospholipid metabolism, Phosphatidylinositol signaling system, Ether lipid metabolism, Inositol phosphate metabolism	map00564, map04070, map00565, map00562	30, 24, 13, 25	ec:3.1.4.4 - D, ec:2.7.7.15 - cytidylyltransferase, ec:2.3.1.51 - O-acyltransferase, ec:2.7.8.5 - 1-phosphatidyltransferase, ec:2.3.1.23 - O-acyltransferase, ec:2.3.1.42 - O-acyltransferase, ec:2.7.8.11 - 3-phosphatidyltransferase, ec:2.1.1.17 - N-methyltransferase, ec:1.1.1.8 - dehydrogenase (NAD+), ec:4.1.1.65 - decarboxylase, ec:2.7.8.1 - EPT, ec:2.7.7.41 - cytidylyltransferase, ec:2.7.1.107 -…
TRINITY_DN45836_c0_g1_i1	Other glycan degradation	map00511	9	ec:3.2.1.45 - psychosine hydrolase, ec:3.2.1.51 - alpha-fucosidase, ec:3.2.1.23 - lactase (ambiguous), ec:3.2.1.25 - mannanase, ec:3.5.1.26 - aspartylglucosylamine deaspartylase, ec:3.2.1.96 - endo-beta-N-acetylglucosaminidase, ec:3.2.1.18 - neuraminidase, ec:3.2.1.52 - hexosaminidase, ec:3.2.1.24 - alpha-D-mannosidase
TRINITY_DN9940_c1_g1_i10	Sphingolipid metabolism, Galactose metabolism, Glycosaminoglycan degradation, Glycosphingolipid biosynthesis - ganglio series, Other glycan degradation	map00600, map00052, map00531, map00604, map00511	18, 19, 11, 5, 9	ec:2.7.1.138 - kinase, ec:3.2.1.45 - psychosine hydrolase, ec:2.7.8.27 - synthase, ec:3.1.4.12 - phosphodiesterase, ec:3.1.6.1 - sulfatase, ec:3.2.1.23 - lactase (ambiguous), ec:3.2.1.22 - melibiase, ec:2.3.1.50 - C-palmitoyltransferase, ec:3.5.1.23 - acylsphingosine deacylase, ec:3.2.1.46 - cerebroside galactosidase, ec:2.3.1.24 - N-acyltransferase, ec:3.1.4.41 - phosphodiesterase D, ec:3.1.3.4 …
TRINITY_DN1004_c0_g1_i9	Drug metabolism - other enzymes, Nitrotoluene degradation, Caffeine metabolism	map00983, map00633, map00232	20, 1, 3	ec:2.7.1.48 - kinase, ec:3.5.2.2 - hydantoinase, ec:3.1.1.1 - ali-esterase, ec:1.17.4.1 - reductase, ec:2.4.2.10 - phosphoribosyltransferase, ec:3.2.1.31 - beta-glucuronide glucuronohydrolase glucuronidase, ec:3.6.1.23 - diphosphatase, ec:3.5.4.5 - deaminase, ec:6.3.5.2 - synthase (glutamine-hydrolysing), ec:2.3.1.5 - N-acetyltransferase, ec:2.4.1.17 - 1-naphthol glucuronyltransferase, ec:2.4.2.8…
TRINITY_DN1585_c0_g1_i2	Glycerophospholipid metabolism, Phosphatidylinositol signaling system, Ether lipid metabolism, Inositol phosphate metabolism	map00564, map04070, map00565, map00562	30, 24, 13, 25	ec:3.1.4.4 - D, ec:2.7.7.15 - cytidylyltransferase, ec:2.3.1.51 - O-acyltransferase, ec:2.7.8.5 - 1-phosphatidyltransferase, ec:2.3.1.23 - O-acyltransferase, ec:2.3.1.42 - O-acyltransferase, ec:2.7.8.11 - 3-phosphatidyltransferase, ec:2.1.1.17 - N-methyltransferase, ec:1.1.1.8 - dehydrogenase (NAD+), ec:4.1.1.65 - decarboxylase, ec:2.7.8.1 - EPT, ec:2.7.7.41 - cytidylyltransferase, ec:2.7.1.107 -…
TRINITY_DN1004_c0_g1_i4	Drug metabolism - other enzymes, Nitrotoluene degradation, Caffeine metabolism	map00983, map00633, map00232	20, 1, 3	ec:2.7.1.48 - kinase, ec:3.5.2.2 - hydantoinase, ec:3.1.1.1 - ali-esterase, ec:1.17.4.1 - reductase, ec:2.4.2.10 - phosphoribosyltransferase, ec:3.2.1.31 - beta-glucuronide glucuronohydrolase glucuronidase, ec:3.6.1.23 - diphosphatase, ec:3.5.4.5 - deaminase, ec:6.3.5.2 - synthase (glutamine-hydrolysing), ec:2.3.1.5 - N-acetyltransferase, ec:2.4.1.17 - 1-naphthol glucuronyltransferase, ec:2.4.2.8…
TRINITY_DN569_c1_g1_i12	Various types of N-glycan biosynthesis, N-Glycan biosynthesis, Other glycan degradation	map00513, map00510, map00511	13, 20, 9	ec:2.4.1.38 - beta-1,4-galactosyltransferase, ec:2.4.1.101 - 2-beta-N-acetylglucosaminyltransferase, ec:2.4.1.68 - 6-alpha-L-fucosyltransferase, ec:2.4.1.131 - alpha-1,2-mannosyltransferase, ec:2.4.1.258 - alpha-1,3-mannosyltransferase, ec:2.4.1.141 - N-acetylglucosaminyltransferase, ec:2.4.1.132 - alpha-1,3-mannosyltransferase, ec:2.4.1.143 - 2-beta-N-acetylglucosaminyltransferase, ec:3.2.1.52 -…
TRINITY_DN1004_c0_g1_i6	Drug metabolism - other enzymes, Nitrotoluene degradation, Caffeine metabolism	map00983, map00633, map00232	20, 1, 3	ec:2.7.1.48 - kinase, ec:3.5.2.2 - hydantoinase, ec:3.1.1.1 - ali-esterase, ec:1.17.4.1 - reductase, ec:2.4.2.10 - phosphoribosyltransferase, ec:3.2.1.31 - beta-glucuronide glucuronohydrolase glucuronidase, ec:3.6.1.23 - diphosphatase, ec:3.5.4.5 - deaminase, ec:6.3.5.2 - synthase (glutamine-hydrolysing), ec:2.3.1.5 - N-acetyltransferase, ec:2.4.1.17 - 1-naphthol glucuronyltransferase, ec:2.4.2.8…
TRINITY_DN1004_c0_g1_i7	Drug metabolism - other enzymes, Nitrotoluene degradation, Caffeine metabolism	map00983, map00633, map00232	20, 1, 3	ec:2.7.1.48 - kinase, ec:3.5.2.2 - hydantoinase, ec:3.1.1.1 - ali-esterase, ec:1.17.4.1 - reductase, ec:2.4.2.10 - phosphoribosyltransferase, ec:3.2.1.31 - beta-glucuronide glucuronohydrolase glucuronidase, ec:3.6.1.23 - diphosphatase, ec:3.5.4.5 - deaminase, ec:6.3.5.2 - synthase (glutamine-hydrolysing), ec:2.3.1.5 - N-acetyltransferase, ec:2.4.1.17 - 1-naphthol glucuronyltransferase, ec:2.4.2.8…
TRINITY_DN569_c1_g1_i13	Various types of N-glycan biosynthesis, N-Glycan biosynthesis, Other glycan degradation	map00513, map00510, map00511	13, 20, 9	ec:2.4.1.38 - beta-1,4-galactosyltransferase, ec:2.4.1.101 - 2-beta-N-acetylglucosaminyltransferase, ec:2.4.1.68 - 6-alpha-L-fucosyltransferase, ec:2.4.1.131 - alpha-1,2-mannosyltransferase, ec:2.4.1.258 - alpha-1,3-mannosyltransferase, ec:2.4.1.141 - N-acetylglucosaminyltransferase, ec:2.4.1.132 - alpha-1,3-mannosyltransferase, ec:2.4.1.143 - 2-beta-N-acetylglucosaminyltransferase, ec:3.2.1.52 -…
TRINITY_DN1004_c0_g1_i3	Drug metabolism - other enzymes, Nitrotoluene degradation, Caffeine metabolism	map00983, map00633, map00232	20, 1, 3	ec:2.7.1.48 - kinase, ec:3.5.2.2 - hydantoinase, ec:3.1.1.1 - ali-esterase, ec:1.17.4.1 - reductase, ec:2.4.2.10 - phosphoribosyltransferase, ec:3.2.1.31 - beta-glucuronide glucuronohydrolase glucuronidase, ec:3.6.1.23 - diphosphatase, ec:3.5.4.5 - deaminase, ec:6.3.5.2 - synthase (glutamine-hydrolysing), ec:2.3.1.5 - N-acetyltransferase, ec:2.4.1.17 - 1-naphthol glucuronyltransferase, ec:2.4.2.8…
TRINITY_DN5411_c0_g1_i3	Aminoacyl-tRNA biosynthesis	map00970	22	ec:6.1.1.22 - ligase, ec:6.1.1.19 - ligase, ec:2.1.2.9 - formyltransferase, ec:6.1.1.9 - ligase, ec:6.1.1.3 - ligase, ec:6.1.1.15 - ligase, ec:6.1.1.5 - ligase, ec:6.1.1.10 - ligase, ec:6.1.1.21 - ligase, ec:6.1.1.18 - ligase, ec:6.1.1.7 - ligase, ec:6.1.1.12 - ligase, ec:6.1.1.2 - ligase, ec:6.3.5.7 - synthase (glutamine-hydrolysing), ec:6.1.1.14 - ligase, ec:6.1.1.4 - ligase, ec:6.1.1.20 - liga…
TRINITY_DN5411_c0_g1_i2	Aminoacyl-tRNA biosynthesis	map00970	22	ec:6.1.1.22 - ligase, ec:6.1.1.19 - ligase, ec:2.1.2.9 - formyltransferase, ec:6.1.1.9 - ligase, ec:6.1.1.3 - ligase, ec:6.1.1.15 - ligase, ec:6.1.1.5 - ligase, ec:6.1.1.10 - ligase, ec:6.1.1.21 - ligase, ec:6.1.1.18 - ligase, ec:6.1.1.7 - ligase, ec:6.1.1.12 - ligase, ec:6.1.1.2 - ligase, ec:6.3.5.7 - synthase (glutamine-hydrolysing), ec:6.1.1.14 - ligase, ec:6.1.1.4 - ligase, ec:6.1.1.20 - liga…
TRINITY_DN5411_c0_g1_i1	Aminoacyl-tRNA biosynthesis	map00970	22	ec:6.1.1.22 - ligase, ec:6.1.1.19 - ligase, ec:2.1.2.9 - formyltransferase, ec:6.1.1.9 - ligase, ec:6.1.1.3 - ligase, ec:6.1.1.15 - ligase, ec:6.1.1.5 - ligase, ec:6.1.1.10 - ligase, ec:6.1.1.21 - ligase, ec:6.1.1.18 - ligase, ec:6.1.1.7 - ligase, ec:6.1.1.12 - ligase, ec:6.1.1.2 - ligase, ec:6.3.5.7 - synthase (glutamine-hydrolysing), ec:6.1.1.14 - ligase, ec:6.1.1.4 - ligase, ec:6.1.1.20 - liga…
TRINITY_DN6765_c1_g1_i2	Drug metabolism - other enzymes, Nitrotoluene degradation, Caffeine metabolism	map00983, map00633, map00232	20, 1, 3	ec:2.7.1.48 - kinase, ec:3.5.2.2 - hydantoinase, ec:3.1.1.1 - ali-esterase, ec:1.17.4.1 - reductase, ec:2.4.2.10 - phosphoribosyltransferase, ec:3.2.1.31 - beta-glucuronide glucuronohydrolase glucuronidase, ec:3.6.1.23 - diphosphatase, ec:3.5.4.5 - deaminase, ec:6.3.5.2 - synthase (glutamine-hydrolysing), ec:2.3.1.5 - N-acetyltransferase, ec:2.4.1.17 - 1-naphthol glucuronyltransferase, ec:2.4.2.8…
TRINITY_DN266805_c0_g1_i1	Glycerophospholipid metabolism, Phosphatidylinositol signaling system, Ether lipid metabolism, Inositol phosphate metabolism	map00564, map04070, map00565, map00562	30, 24, 13, 25	ec:3.1.4.4 - D, ec:2.7.7.15 - cytidylyltransferase, ec:2.3.1.51 - O-acyltransferase, ec:2.7.8.5 - 1-phosphatidyltransferase, ec:2.3.1.23 - O-acyltransferase, ec:2.3.1.42 - O-acyltransferase, ec:2.7.8.11 - 3-phosphatidyltransferase, ec:2.1.1.17 - N-methyltransferase, ec:1.1.1.8 - dehydrogenase (NAD+), ec:4.1.1.65 - decarboxylase, ec:2.7.8.1 - EPT, ec:2.7.7.41 - cytidylyltransferase, ec:2.7.1.107 -…
TRINITY_DN2574_c0_g1_i5	T cell receptor signaling pathway, PD-L1 expression and PD-1 checkpoint pathway in cancer, Th1 and Th2 cell differentiation, Phosphatidylinositol signaling system, Inositol phosphate metabolism	map04660, map05235, map04658, map04070, map00562	2, 1, 1, 24, 25	ec:2.7.10.2 - protein-tyrosine kinase, ec:3.1.3.16 - phosphatase, ec:3.1.3.16 - phosphatase, ec:3.1.3.16 - phosphatase, ec:2.7.1.127 - 3-kinase, ec:2.7.1.158 - 2-kinase, ec:2.7.1.67 - 4-kinase, ec:2.7.4.24 - kinase, ec:2.7.1.149 - 4-kinase, ec:2.7.8.11 - 3-phosphatidyltransferase, ec:3.1.3.56 - 5-phosphatase, ec:2.7.1.154 - 3-kinase, ec:2.7.7.41 - cytidylyltransferase, ec:2.7.4.21 - kinase, ec:3.…
TRINITY_DN29642_c0_g1_i1	Carbon fixation pathways in prokaryotes, Propanoate metabolism, Valine, leucine and isoleucine degradation, Glyoxylate and dicarboxylate metabolism	map00720, map00640, map00280, map00630	21, 21, 22, 18	ec:1.1.1.35 - dehydrogenase, ec:6.2.1.1 - ligase, ec:6.4.1.3 - carboxylase, ec:4.1.3.25 - lyase, ec:1.5.1.5 - dehydrogenase (NADP+), ec:1.1.1.37 - dehydrogenase, ec:1.1.1.42 - dehydrogenase (NADP+), ec:6.2.1.5 - ligase (ADP-forming), ec:5.1.99.1 - epimerase, ec:1.3.5.1 - dehydrogenase, ec:6.4.1.2 - carboxylase, ec:2.3.3.8 - citrate synthase, ec:1.5.1.20 - reductase [NAD(P)H], ec:5.4.99.2 - mutase…
TRINITY_DN5865_c0_g1_i9	Various types of N-glycan biosynthesis, N-Glycan biosynthesis, Other glycan degradation	map00513, map00510, map00511	13, 20, 9	ec:2.4.1.38 - beta-1,4-galactosyltransferase, ec:2.4.1.101 - 2-beta-N-acetylglucosaminyltransferase, ec:2.4.1.68 - 6-alpha-L-fucosyltransferase, ec:2.4.1.131 - alpha-1,2-mannosyltransferase, ec:2.4.1.258 - alpha-1,3-mannosyltransferase, ec:2.4.1.141 - N-acetylglucosaminyltransferase, ec:2.4.1.132 - alpha-1,3-mannosyltransferase, ec:2.4.1.143 - 2-beta-N-acetylglucosaminyltransferase, ec:3.2.1.52 -…
TRINITY_DN2574_c0_g1_i6	T cell receptor signaling pathway, PD-L1 expression and PD-1 checkpoint pathway in cancer, Th1 and Th2 cell differentiation, Phosphatidylinositol signaling system, Inositol phosphate metabolism	map04660, map05235, map04658, map04070, map00562	2, 1, 1, 24, 25	ec:2.7.10.2 - protein-tyrosine kinase, ec:3.1.3.16 - phosphatase, ec:3.1.3.16 - phosphatase, ec:3.1.3.16 - phosphatase, ec:2.7.1.127 - 3-kinase, ec:2.7.1.158 - 2-kinase, ec:2.7.1.67 - 4-kinase, ec:2.7.4.24 - kinase, ec:2.7.1.149 - 4-kinase, ec:2.7.8.11 - 3-phosphatidyltransferase, ec:3.1.3.56 - 5-phosphatase, ec:2.7.1.154 - 3-kinase, ec:2.7.7.41 - cytidylyltransferase, ec:2.7.4.21 - kinase, ec:3.…
TRINITY_DN2574_c0_g1_i7	T cell receptor signaling pathway, PD-L1 expression and PD-1 checkpoint pathway in cancer, Th1 and Th2 cell differentiation, Phosphatidylinositol signaling system, Inositol phosphate metabolism	map04660, map05235, map04658, map04070, map00562	2, 1, 1, 24, 25	ec:2.7.10.2 - protein-tyrosine kinase, ec:3.1.3.16 - phosphatase, ec:3.1.3.16 - phosphatase, ec:3.1.3.16 - phosphatase, ec:2.7.1.127 - 3-kinase, ec:2.7.1.158 - 2-kinase, ec:2.7.1.67 - 4-kinase, ec:2.7.4.24 - kinase, ec:2.7.1.149 - 4-kinase, ec:2.7.8.11 - 3-phosphatidyltransferase, ec:3.1.3.56 - 5-phosphatase, ec:2.7.1.154 - 3-kinase, ec:2.7.7.41 - cytidylyltransferase, ec:2.7.4.21 - kinase, ec:3.…
TRINITY_DN5865_c0_g1_i8	Citrate cycle (TCA cycle)	map00020	17	ec:4.1.1.32 - carboxykinase (GTP), ec:2.3.1.12 - acetyltransferase, ec:1.2.4.2 - dehydrogenase (succinyl-transferring), ec:2.3.1.61 - succinyltransferase, ec:1.8.1.4 - dehydrogenase, ec:1.1.1.37 - dehydrogenase, ec:1.1.1.42 - dehydrogenase (NADP+), ec:2.3.3.1 - (Si)-synthase, ec:6.2.1.5 - ligase (ADP-forming), ec:1.3.5.1 - dehydrogenase, ec:1.2.4.1 - dehydrogenase (acetyl-transferring), ec:2.3.3.…
TRINITY_DN5865_c0_g1_i7	Various types of N-glycan biosynthesis, N-Glycan biosynthesis, Other glycan degradation	map00513, map00510, map00511	13, 20, 9	ec:2.4.1.38 - beta-1,4-galactosyltransferase, ec:2.4.1.101 - 2-beta-N-acetylglucosaminyltransferase, ec:2.4.1.68 - 6-alpha-L-fucosyltransferase, ec:2.4.1.131 - alpha-1,2-mannosyltransferase, ec:2.4.1.258 - alpha-1,3-mannosyltransferase, ec:2.4.1.141 - N-acetylglucosaminyltransferase, ec:2.4.1.132 - alpha-1,3-mannosyltransferase, ec:2.4.1.143 - 2-beta-N-acetylglucosaminyltransferase, ec:3.2.1.52 -…
TRINITY_DN2574_c0_g1_i9	T cell receptor signaling pathway, PD-L1 expression and PD-1 checkpoint pathway in cancer, Th1 and Th2 cell differentiation, Phosphatidylinositol signaling system, Inositol phosphate metabolism	map04660, map05235, map04658, map04070, map00562	2, 1, 1, 24, 25	ec:2.7.10.2 - protein-tyrosine kinase, ec:3.1.3.16 - phosphatase, ec:3.1.3.16 - phosphatase, ec:3.1.3.16 - phosphatase, ec:2.7.1.127 - 3-kinase, ec:2.7.1.158 - 2-kinase, ec:2.7.1.67 - 4-kinase, ec:2.7.4.24 - kinase, ec:2.7.1.149 - 4-kinase, ec:2.7.8.11 - 3-phosphatidyltransferase, ec:3.1.3.56 - 5-phosphatase, ec:2.7.1.154 - 3-kinase, ec:2.7.7.41 - cytidylyltransferase, ec:2.7.4.21 - kinase, ec:3.…
TRINITY_DN2711_c1_g3_i1	Purine metabolism, Thiamine metabolism	map00230, map00730	54, 7	ec:3.6.1.15 - phosphatase, ec:4.6.1.2 - cyclase, ec:3.1.4.35 - phosphodiesterase, ec:3.5.4.10 - cyclohydrolase, ec:3.1.5.1 - deoxy-GTPase, ec:3.6.1.9 - diphosphatase, ec:3.5.4.3 - deaminase, ec:3.6.1.17 - (asymmetrical), ec:1.17.4.1 - reductase, ec:3.6.1.3 - adenylpyrophosphatase, ec:3.1.4.17 - phosphodiesterase, ec:4.3.2.2 - lyase, ec:1.7.1.7 - reductase, ec:1.17.1.4 - dehydrogenase, ec:2.7.7.4 …
TRINITY_DN41232_c0_g1_i12	T cell receptor signaling pathway	map04660	2	ec:2.7.10.2 - protein-tyrosine kinase, ec:3.1.3.16 - phosphatase
TRINITY_DN5865_c0_g1_i1	Various types of N-glycan biosynthesis, N-Glycan biosynthesis, Other glycan degradation	map00513, map00510, map00511	13, 20, 9	ec:2.4.1.38 - beta-1,4-galactosyltransferase, ec:2.4.1.101 - 2-beta-N-acetylglucosaminyltransferase, ec:2.4.1.68 - 6-alpha-L-fucosyltransferase, ec:2.4.1.131 - alpha-1,2-mannosyltransferase, ec:2.4.1.258 - alpha-1,3-mannosyltransferase, ec:2.4.1.141 - N-acetylglucosaminyltransferase, ec:2.4.1.132 - alpha-1,3-mannosyltransferase, ec:2.4.1.143 - 2-beta-N-acetylglucosaminyltransferase, ec:3.2.1.52 -…
TRINITY_DN7206_c0_g1_i14	Purine metabolism, Thiamine metabolism	map00230, map00730	54, 7	ec:3.6.1.15 - phosphatase, ec:4.6.1.2 - cyclase, ec:3.1.4.35 - phosphodiesterase, ec:3.5.4.10 - cyclohydrolase, ec:3.1.5.1 - deoxy-GTPase, ec:3.6.1.9 - diphosphatase, ec:3.5.4.3 - deaminase, ec:3.6.1.17 - (asymmetrical), ec:1.17.4.1 - reductase, ec:3.6.1.3 - adenylpyrophosphatase, ec:3.1.4.17 - phosphodiesterase, ec:4.3.2.2 - lyase, ec:1.7.1.7 - reductase, ec:1.17.1.4 - dehydrogenase, ec:2.7.7.4 …
TRINITY_DN7206_c0_g1_i15	Purine metabolism, Thiamine metabolism	map00230, map00730	54, 7	ec:3.6.1.15 - phosphatase, ec:4.6.1.2 - cyclase, ec:3.1.4.35 - phosphodiesterase, ec:3.5.4.10 - cyclohydrolase, ec:3.1.5.1 - deoxy-GTPase, ec:3.6.1.9 - diphosphatase, ec:3.5.4.3 - deaminase, ec:3.6.1.17 - (asymmetrical), ec:1.17.4.1 - reductase, ec:3.6.1.3 - adenylpyrophosphatase, ec:3.1.4.17 - phosphodiesterase, ec:4.3.2.2 - lyase, ec:1.7.1.7 - reductase, ec:1.17.1.4 - dehydrogenase, ec:2.7.7.4 …
TRINITY_DN7206_c0_g1_i16	Purine metabolism, Thiamine metabolism	map00230, map00730	54, 7	ec:3.6.1.15 - phosphatase, ec:4.6.1.2 - cyclase, ec:3.1.4.35 - phosphodiesterase, ec:3.5.4.10 - cyclohydrolase, ec:3.1.5.1 - deoxy-GTPase, ec:3.6.1.9 - diphosphatase, ec:3.5.4.3 - deaminase, ec:3.6.1.17 - (asymmetrical), ec:1.17.4.1 - reductase, ec:3.6.1.3 - adenylpyrophosphatase, ec:3.1.4.17 - phosphodiesterase, ec:4.3.2.2 - lyase, ec:1.7.1.7 - reductase, ec:1.17.1.4 - dehydrogenase, ec:2.7.7.4 …
TRINITY_DN7206_c0_g1_i17	Purine metabolism, Thiamine metabolism	map00230, map00730	54, 7	ec:3.6.1.15 - phosphatase, ec:4.6.1.2 - cyclase, ec:3.1.4.35 - phosphodiesterase, ec:3.5.4.10 - cyclohydrolase, ec:3.1.5.1 - deoxy-GTPase, ec:3.6.1.9 - diphosphatase, ec:3.5.4.3 - deaminase, ec:3.6.1.17 - (asymmetrical), ec:1.17.4.1 - reductase, ec:3.6.1.3 - adenylpyrophosphatase, ec:3.1.4.17 - phosphodiesterase, ec:4.3.2.2 - lyase, ec:1.7.1.7 - reductase, ec:1.17.1.4 - dehydrogenase, ec:2.7.7.4 …
TRINITY_DN5865_c0_g1_i5	Various types of N-glycan biosynthesis, N-Glycan biosynthesis, Other glycan degradation	map00513, map00510, map00511	13, 20, 9	ec:2.4.1.38 - beta-1,4-galactosyltransferase, ec:2.4.1.101 - 2-beta-N-acetylglucosaminyltransferase, ec:2.4.1.68 - 6-alpha-L-fucosyltransferase, ec:2.4.1.131 - alpha-1,2-mannosyltransferase, ec:2.4.1.258 - alpha-1,3-mannosyltransferase, ec:2.4.1.141 - N-acetylglucosaminyltransferase, ec:2.4.1.132 - alpha-1,3-mannosyltransferase, ec:2.4.1.143 - 2-beta-N-acetylglucosaminyltransferase, ec:3.2.1.52 -…
TRINITY_DN2574_c0_g1_i2	T cell receptor signaling pathway, PD-L1 expression and PD-1 checkpoint pathway in cancer, Th1 and Th2 cell differentiation, Phosphatidylinositol signaling system, Inositol phosphate metabolism	map04660, map05235, map04658, map04070, map00562	2, 1, 1, 24, 25	ec:2.7.10.2 - protein-tyrosine kinase, ec:3.1.3.16 - phosphatase, ec:3.1.3.16 - phosphatase, ec:3.1.3.16 - phosphatase, ec:2.7.1.127 - 3-kinase, ec:2.7.1.158 - 2-kinase, ec:2.7.1.67 - 4-kinase, ec:2.7.4.24 - kinase, ec:2.7.1.149 - 4-kinase, ec:2.7.8.11 - 3-phosphatidyltransferase, ec:3.1.3.56 - 5-phosphatase, ec:2.7.1.154 - 3-kinase, ec:2.7.7.41 - cytidylyltransferase, ec:2.7.4.21 - kinase, ec:3.…
TRINITY_DN7206_c0_g1_i18	Purine metabolism, Thiamine metabolism	map00230, map00730	54, 7	ec:3.6.1.15 - phosphatase, ec:4.6.1.2 - cyclase, ec:3.1.4.35 - phosphodiesterase, ec:3.5.4.10 - cyclohydrolase, ec:3.1.5.1 - deoxy-GTPase, ec:3.6.1.9 - diphosphatase, ec:3.5.4.3 - deaminase, ec:3.6.1.17 - (asymmetrical), ec:1.17.4.1 - reductase, ec:3.6.1.3 - adenylpyrophosphatase, ec:3.1.4.17 - phosphodiesterase, ec:4.3.2.2 - lyase, ec:1.7.1.7 - reductase, ec:1.17.1.4 - dehydrogenase, ec:2.7.7.4 …
TRINITY_DN5865_c0_g1_i4	Various types of N-glycan biosynthesis, N-Glycan biosynthesis, Other glycan degradation	map00513, map00510, map00511	13, 20, 9	ec:2.4.1.38 - beta-1,4-galactosyltransferase, ec:2.4.1.101 - 2-beta-N-acetylglucosaminyltransferase, ec:2.4.1.68 - 6-alpha-L-fucosyltransferase, ec:2.4.1.131 - alpha-1,2-mannosyltransferase, ec:2.4.1.258 - alpha-1,3-mannosyltransferase, ec:2.4.1.141 - N-acetylglucosaminyltransferase, ec:2.4.1.132 - alpha-1,3-mannosyltransferase, ec:2.4.1.143 - 2-beta-N-acetylglucosaminyltransferase, ec:3.2.1.52 -…
TRINITY_DN2574_c0_g1_i3	T cell receptor signaling pathway, PD-L1 expression and PD-1 checkpoint pathway in cancer, Th1 and Th2 cell differentiation, Phosphatidylinositol signaling system, Inositol phosphate metabolism	map04660, map05235, map04658, map04070, map00562	2, 1, 1, 24, 25	ec:2.7.10.2 - protein-tyrosine kinase, ec:3.1.3.16 - phosphatase, ec:3.1.3.16 - phosphatase, ec:3.1.3.16 - phosphatase, ec:2.7.1.127 - 3-kinase, ec:2.7.1.158 - 2-kinase, ec:2.7.1.67 - 4-kinase, ec:2.7.4.24 - kinase, ec:2.7.1.149 - 4-kinase, ec:2.7.8.11 - 3-phosphatidyltransferase, ec:3.1.3.56 - 5-phosphatase, ec:2.7.1.154 - 3-kinase, ec:2.7.7.41 - cytidylyltransferase, ec:2.7.4.21 - kinase, ec:3.…
TRINITY_DN2202_c0_g1_i10	Purine metabolism, Thiamine metabolism	map00230, map00730	54, 7	ec:3.6.1.15 - phosphatase, ec:4.6.1.2 - cyclase, ec:3.1.4.35 - phosphodiesterase, ec:3.5.4.10 - cyclohydrolase, ec:3.1.5.1 - deoxy-GTPase, ec:3.6.1.9 - diphosphatase, ec:3.5.4.3 - deaminase, ec:3.6.1.17 - (asymmetrical), ec:1.17.4.1 - reductase, ec:3.6.1.3 - adenylpyrophosphatase, ec:3.1.4.17 - phosphodiesterase, ec:4.3.2.2 - lyase, ec:1.7.1.7 - reductase, ec:1.17.1.4 - dehydrogenase, ec:2.7.7.4 …
TRINITY_DN2202_c0_g1_i12	Purine metabolism, Thiamine metabolism	map00230, map00730	54, 7	ec:3.6.1.15 - phosphatase, ec:4.6.1.2 - cyclase, ec:3.1.4.35 - phosphodiesterase, ec:3.5.4.10 - cyclohydrolase, ec:3.1.5.1 - deoxy-GTPase, ec:3.6.1.9 - diphosphatase, ec:3.5.4.3 - deaminase, ec:3.6.1.17 - (asymmetrical), ec:1.17.4.1 - reductase, ec:3.6.1.3 - adenylpyrophosphatase, ec:3.1.4.17 - phosphodiesterase, ec:4.3.2.2 - lyase, ec:1.7.1.7 - reductase, ec:1.17.1.4 - dehydrogenase, ec:2.7.7.4 …
TRINITY_DN66485_c0_g2_i2	Purine metabolism, Thiamine metabolism	map00230, map00730	54, 7	ec:3.6.1.15 - phosphatase, ec:4.6.1.2 - cyclase, ec:3.1.4.35 - phosphodiesterase, ec:3.5.4.10 - cyclohydrolase, ec:3.1.5.1 - deoxy-GTPase, ec:3.6.1.9 - diphosphatase, ec:3.5.4.3 - deaminase, ec:3.6.1.17 - (asymmetrical), ec:1.17.4.1 - reductase, ec:3.6.1.3 - adenylpyrophosphatase, ec:3.1.4.17 - phosphodiesterase, ec:4.3.2.2 - lyase, ec:1.7.1.7 - reductase, ec:1.17.1.4 - dehydrogenase, ec:2.7.7.4 …
TRINITY_DN245614_c0_g1_i1	Purine metabolism, Thiamine metabolism	map00230, map00730	54, 7	ec:3.6.1.15 - phosphatase, ec:4.6.1.2 - cyclase, ec:3.1.4.35 - phosphodiesterase, ec:3.5.4.10 - cyclohydrolase, ec:3.1.5.1 - deoxy-GTPase, ec:3.6.1.9 - diphosphatase, ec:3.5.4.3 - deaminase, ec:3.6.1.17 - (asymmetrical), ec:1.17.4.1 - reductase, ec:3.6.1.3 - adenylpyrophosphatase, ec:3.1.4.17 - phosphodiesterase, ec:4.3.2.2 - lyase, ec:1.7.1.7 - reductase, ec:1.17.1.4 - dehydrogenase, ec:2.7.7.4 …
TRINITY_DN52559_c1_g1_i2	Purine metabolism, Thiamine metabolism	map00230, map00730	54, 7	ec:3.6.1.15 - phosphatase, ec:4.6.1.2 - cyclase, ec:3.1.4.35 - phosphodiesterase, ec:3.5.4.10 - cyclohydrolase, ec:3.1.5.1 - deoxy-GTPase, ec:3.6.1.9 - diphosphatase, ec:3.5.4.3 - deaminase, ec:3.6.1.17 - (asymmetrical), ec:1.17.4.1 - reductase, ec:3.6.1.3 - adenylpyrophosphatase, ec:3.1.4.17 - phosphodiesterase, ec:4.3.2.2 - lyase, ec:1.7.1.7 - reductase, ec:1.17.1.4 - dehydrogenase, ec:2.7.7.4 …
TRINITY_DN7206_c0_g1_i11	Purine metabolism, Thiamine metabolism	map00230, map00730	54, 7	ec:3.6.1.15 - phosphatase, ec:4.6.1.2 - cyclase, ec:3.1.4.35 - phosphodiesterase, ec:3.5.4.10 - cyclohydrolase, ec:3.1.5.1 - deoxy-GTPase, ec:3.6.1.9 - diphosphatase, ec:3.5.4.3 - deaminase, ec:3.6.1.17 - (asymmetrical), ec:1.17.4.1 - reductase, ec:3.6.1.3 - adenylpyrophosphatase, ec:3.1.4.17 - phosphodiesterase, ec:4.3.2.2 - lyase, ec:1.7.1.7 - reductase, ec:1.17.1.4 - dehydrogenase, ec:2.7.7.4 …
TRINITY_DN8848_c0_g1_i1	T cell receptor signaling pathway, PD-L1 expression and PD-1 checkpoint pathway in cancer, Th1 and Th2 cell differentiation	map04660, map05235, map04658	2, 1, 1	ec:2.7.10.2 - protein-tyrosine kinase, ec:3.1.3.16 - phosphatase, ec:3.1.3.16 - phosphatase, ec:3.1.3.16 - phosphatase
TRINITY_DN52559_c1_g1_i1	Purine metabolism, Thiamine metabolism	map00230, map00730	54, 7	ec:3.6.1.15 - phosphatase, ec:4.6.1.2 - cyclase, ec:3.1.4.35 - phosphodiesterase, ec:3.5.4.10 - cyclohydrolase, ec:3.1.5.1 - deoxy-GTPase, ec:3.6.1.9 - diphosphatase, ec:3.5.4.3 - deaminase, ec:3.6.1.17 - (asymmetrical), ec:1.17.4.1 - reductase, ec:3.6.1.3 - adenylpyrophosphatase, ec:3.1.4.17 - phosphodiesterase, ec:4.3.2.2 - lyase, ec:1.7.1.7 - reductase, ec:1.17.1.4 - dehydrogenase, ec:2.7.7.4 …
TRINITY_DN7206_c0_g1_i12	Purine metabolism, Thiamine metabolism	map00230, map00730	54, 7	ec:3.6.1.15 - phosphatase, ec:4.6.1.2 - cyclase, ec:3.1.4.35 - phosphodiesterase, ec:3.5.4.10 - cyclohydrolase, ec:3.1.5.1 - deoxy-GTPase, ec:3.6.1.9 - diphosphatase, ec:3.5.4.3 - deaminase, ec:3.6.1.17 - (asymmetrical), ec:1.17.4.1 - reductase, ec:3.6.1.3 - adenylpyrophosphatase, ec:3.1.4.17 - phosphodiesterase, ec:4.3.2.2 - lyase, ec:1.7.1.7 - reductase, ec:1.17.1.4 - dehydrogenase, ec:2.7.7.4 …
TRINITY_DN11213_c1_g2_i1	Purine metabolism, Thiamine metabolism	map00230, map00730	54, 7	ec:3.6.1.15 - phosphatase, ec:4.6.1.2 - cyclase, ec:3.1.4.35 - phosphodiesterase, ec:3.5.4.10 - cyclohydrolase, ec:3.1.5.1 - deoxy-GTPase, ec:3.6.1.9 - diphosphatase, ec:3.5.4.3 - deaminase, ec:3.6.1.17 - (asymmetrical), ec:1.17.4.1 - reductase, ec:3.6.1.3 - adenylpyrophosphatase, ec:3.1.4.17 - phosphodiesterase, ec:4.3.2.2 - lyase, ec:1.7.1.7 - reductase, ec:1.17.1.4 - dehydrogenase, ec:2.7.7.4 …
TRINITY_DN1801_c1_g1_i2	Drug metabolism - other enzymes, Nitrotoluene degradation, Caffeine metabolism	map00983, map00633, map00232	20, 1, 3	ec:2.7.1.48 - kinase, ec:3.5.2.2 - hydantoinase, ec:3.1.1.1 - ali-esterase, ec:1.17.4.1 - reductase, ec:2.4.2.10 - phosphoribosyltransferase, ec:3.2.1.31 - beta-glucuronide glucuronohydrolase glucuronidase, ec:3.6.1.23 - diphosphatase, ec:3.5.4.5 - deaminase, ec:6.3.5.2 - synthase (glutamine-hydrolysing), ec:2.3.1.5 - N-acetyltransferase, ec:2.4.1.17 - 1-naphthol glucuronyltransferase, ec:2.4.2.8…
TRINITY_DN1801_c1_g1_i7	Drug metabolism - other enzymes, Nitrotoluene degradation, Caffeine metabolism	map00983, map00633, map00232	20, 1, 3	ec:2.7.1.48 - kinase, ec:3.5.2.2 - hydantoinase, ec:3.1.1.1 - ali-esterase, ec:1.17.4.1 - reductase, ec:2.4.2.10 - phosphoribosyltransferase, ec:3.2.1.31 - beta-glucuronide glucuronohydrolase glucuronidase, ec:3.6.1.23 - diphosphatase, ec:3.5.4.5 - deaminase, ec:6.3.5.2 - synthase (glutamine-hydrolysing), ec:2.3.1.5 - N-acetyltransferase, ec:2.4.1.17 - 1-naphthol glucuronyltransferase, ec:2.4.2.8…
TRINITY_DN1801_c1_g1_i6	Drug metabolism - other enzymes, Nitrotoluene degradation, Caffeine metabolism	map00983, map00633, map00232	20, 1, 3	ec:2.7.1.48 - kinase, ec:3.5.2.2 - hydantoinase, ec:3.1.1.1 - ali-esterase, ec:1.17.4.1 - reductase, ec:2.4.2.10 - phosphoribosyltransferase, ec:3.2.1.31 - beta-glucuronide glucuronohydrolase glucuronidase, ec:3.6.1.23 - diphosphatase, ec:3.5.4.5 - deaminase, ec:6.3.5.2 - synthase (glutamine-hydrolysing), ec:2.3.1.5 - N-acetyltransferase, ec:2.4.1.17 - 1-naphthol glucuronyltransferase, ec:2.4.2.8…
TRINITY_DN1801_c1_g1_i4	Drug metabolism - other enzymes, Nitrotoluene degradation, Caffeine metabolism	map00983, map00633, map00232	20, 1, 3	ec:2.7.1.48 - kinase, ec:3.5.2.2 - hydantoinase, ec:3.1.1.1 - ali-esterase, ec:1.17.4.1 - reductase, ec:2.4.2.10 - phosphoribosyltransferase, ec:3.2.1.31 - beta-glucuronide glucuronohydrolase glucuronidase, ec:3.6.1.23 - diphosphatase, ec:3.5.4.5 - deaminase, ec:6.3.5.2 - synthase (glutamine-hydrolysing), ec:2.3.1.5 - N-acetyltransferase, ec:2.4.1.17 - 1-naphthol glucuronyltransferase, ec:2.4.2.8…
TRINITY_DN1801_c1_g1_i8	Drug metabolism - other enzymes, Nitrotoluene degradation, Caffeine metabolism	map00983, map00633, map00232	20, 1, 3	ec:2.7.1.48 - kinase, ec:3.5.2.2 - hydantoinase, ec:3.1.1.1 - ali-esterase, ec:1.17.4.1 - reductase, ec:2.4.2.10 - phosphoribosyltransferase, ec:3.2.1.31 - beta-glucuronide glucuronohydrolase glucuronidase, ec:3.6.1.23 - diphosphatase, ec:3.5.4.5 - deaminase, ec:6.3.5.2 - synthase (glutamine-hydrolysing), ec:2.3.1.5 - N-acetyltransferase, ec:2.4.1.17 - 1-naphthol glucuronyltransferase, ec:2.4.2.8…
TRINITY_DN25412_c0_g2_i1	Purine metabolism, Thiamine metabolism	map00230, map00730	54, 7	ec:3.6.1.15 - phosphatase, ec:4.6.1.2 - cyclase, ec:3.1.4.35 - phosphodiesterase, ec:3.5.4.10 - cyclohydrolase, ec:3.1.5.1 - deoxy-GTPase, ec:3.6.1.9 - diphosphatase, ec:3.5.4.3 - deaminase, ec:3.6.1.17 - (asymmetrical), ec:1.17.4.1 - reductase, ec:3.6.1.3 - adenylpyrophosphatase, ec:3.1.4.17 - phosphodiesterase, ec:4.3.2.2 - lyase, ec:1.7.1.7 - reductase, ec:1.17.1.4 - dehydrogenase, ec:2.7.7.4 …
TRINITY_DN23964_c0_g1_i1	Carbon fixation pathways in prokaryotes, Propanoate metabolism, Valine, leucine and isoleucine degradation, Glyoxylate and dicarboxylate metabolism	map00720, map00640, map00280, map00630	21, 21, 22, 18	ec:1.1.1.35 - dehydrogenase, ec:6.2.1.1 - ligase, ec:6.4.1.3 - carboxylase, ec:4.1.3.25 - lyase, ec:1.5.1.5 - dehydrogenase (NADP+), ec:1.1.1.37 - dehydrogenase, ec:1.1.1.42 - dehydrogenase (NADP+), ec:6.2.1.5 - ligase (ADP-forming), ec:5.1.99.1 - epimerase, ec:1.3.5.1 - dehydrogenase, ec:6.4.1.2 - carboxylase, ec:2.3.3.8 - citrate synthase, ec:1.5.1.20 - reductase [NAD(P)H], ec:5.4.99.2 - mutase…
TRINITY_DN45_c0_g1_i10	Glutathione metabolism, Drug metabolism - cytochrome P450, Drug metabolism - other enzymes, Phenylpropanoid biosynthesis, Metabolism of xenobiotics by cytochrome P450, Arachidonic acid metabolism	map00480, map00982, map00983, map00940, map00980, map00590	16, 5, 20, 2, 7, 11	ec:3.4.19.13 - gamma-glutamate hydrolase, ec:1.17.4.1 - reductase, ec:4.3.2.7 - gamma-glutamylcyclotransferase, ec:6.3.2.3 - synthase, ec:2.5.1.22 - synthase, ec:1.11.1.15 - to 1.11.1.24 and 1.11.1.25 and 1.11.1.26 and 1.11.1.27 and 1.11.1.28 and 1.11.1.29, ec:4.1.1.17 - decarboxylase, ec:1.1.1.42 - dehydrogenase (NADP+), ec:1.1.1.44 - dehydrogenase (NADP+-dependent, decarboxylating), ec:2.5.1.16…
TRINITY_DN62604_c1_g1_i1	Purine metabolism, Thiamine metabolism	map00230, map00730	54, 7	ec:3.6.1.15 - phosphatase, ec:4.6.1.2 - cyclase, ec:3.1.4.35 - phosphodiesterase, ec:3.5.4.10 - cyclohydrolase, ec:3.1.5.1 - deoxy-GTPase, ec:3.6.1.9 - diphosphatase, ec:3.5.4.3 - deaminase, ec:3.6.1.17 - (asymmetrical), ec:1.17.4.1 - reductase, ec:3.6.1.3 - adenylpyrophosphatase, ec:3.1.4.17 - phosphodiesterase, ec:4.3.2.2 - lyase, ec:1.7.1.7 - reductase, ec:1.17.1.4 - dehydrogenase, ec:2.7.7.4 …
TRINITY_DN21751_c0_g1_i1	Arginine and proline metabolism	map00330	21	ec:2.7.2.11 - 5-kinase, ec:3.5.1.4 - acylamidase, ec:1.5.1.2 - reductase, ec:1.2.1.3 - dehydrogenase (NAD+), ec:1.2.1.41 - dehydrogenase, ec:2.6.1.13 - aminotransferase, ec:1.2.1.19 - dehydrogenase, ec:1.4.3.3 - oxidase, ec:2.5.1.22 - synthase, ec:4.1.1.17 - decarboxylase, ec:1.14.11.2 - 4-dioxygenase, ec:4.1.1.50 - decarboxylase, ec:2.6.1.1 - transaminase, ec:2.3.1.57 - N-acetyltransferase, ec:2…
TRINITY_DN595_c2_g1_i8	Drug metabolism - other enzymes, Bisphenol degradation, Nitrogen metabolism	map00983, map00363, map00910	20, 1, 7	ec:2.7.1.48 - kinase, ec:3.5.2.2 - hydantoinase, ec:3.1.1.1 - ali-esterase, ec:1.17.4.1 - reductase, ec:2.4.2.10 - phosphoribosyltransferase, ec:3.2.1.31 - beta-glucuronide glucuronohydrolase glucuronidase, ec:3.6.1.23 - diphosphatase, ec:3.5.4.5 - deaminase, ec:6.3.5.2 - synthase (glutamine-hydrolysing), ec:2.3.1.5 - N-acetyltransferase, ec:2.4.1.17 - 1-naphthol glucuronyltransferase, ec:2.4.2.8…
TRINITY_DN68247_c0_g1_i3	Purine metabolism	map00230	54	ec:3.6.1.15 - phosphatase, ec:4.6.1.2 - cyclase, ec:3.1.4.35 - phosphodiesterase, ec:3.5.4.10 - cyclohydrolase, ec:3.1.5.1 - deoxy-GTPase, ec:3.6.1.9 - diphosphatase, ec:3.5.4.3 - deaminase, ec:3.6.1.17 - (asymmetrical), ec:1.17.4.1 - reductase, ec:3.6.1.3 - adenylpyrophosphatase, ec:3.1.4.17 - phosphodiesterase, ec:4.3.2.2 - lyase, ec:1.7.1.7 - reductase, ec:1.17.1.4 - dehydrogenase, ec:2.7.7.4 …
TRINITY_DN184578_c0_g1_i1	Drug metabolism - other enzymes, Purine metabolism	map00983, map00230	20, 54	ec:2.7.1.48 - kinase, ec:3.5.2.2 - hydantoinase, ec:3.1.1.1 - ali-esterase, ec:1.17.4.1 - reductase, ec:2.4.2.10 - phosphoribosyltransferase, ec:3.2.1.31 - beta-glucuronide glucuronohydrolase glucuronidase, ec:3.6.1.23 - diphosphatase, ec:3.5.4.5 - deaminase, ec:6.3.5.2 - synthase (glutamine-hydrolysing), ec:2.3.1.5 - N-acetyltransferase, ec:2.4.1.17 - 1-naphthol glucuronyltransferase, ec:2.4.2.8…
TRINITY_DN3563_c0_g1_i14	Sphingolipid metabolism, Other glycan degradation	map00600, map00511	18, 9	ec:2.7.1.138 - kinase, ec:3.2.1.45 - psychosine hydrolase, ec:2.7.8.27 - synthase, ec:3.1.4.12 - phosphodiesterase, ec:3.1.6.1 - sulfatase, ec:3.2.1.23 - lactase (ambiguous), ec:3.2.1.22 - melibiase, ec:2.3.1.50 - C-palmitoyltransferase, ec:3.5.1.23 - acylsphingosine deacylase, ec:3.2.1.46 - cerebroside galactosidase, ec:2.3.1.24 - N-acyltransferase, ec:3.1.4.41 - phosphodiesterase D, ec:3.1.3.4 …
TRINITY_DN595_c2_g1_i4	Drug metabolism - other enzymes, Bisphenol degradation, Nitrogen metabolism	map00983, map00363, map00910	20, 1, 7	ec:2.7.1.48 - kinase, ec:3.5.2.2 - hydantoinase, ec:3.1.1.1 - ali-esterase, ec:1.17.4.1 - reductase, ec:2.4.2.10 - phosphoribosyltransferase, ec:3.2.1.31 - beta-glucuronide glucuronohydrolase glucuronidase, ec:3.6.1.23 - diphosphatase, ec:3.5.4.5 - deaminase, ec:6.3.5.2 - synthase (glutamine-hydrolysing), ec:2.3.1.5 - N-acetyltransferase, ec:2.4.1.17 - 1-naphthol glucuronyltransferase, ec:2.4.2.8…
TRINITY_DN595_c2_g1_i2	Drug metabolism - other enzymes, Bisphenol degradation, Nitrogen metabolism	map00983, map00363, map00910	20, 1, 7	ec:2.7.1.48 - kinase, ec:3.5.2.2 - hydantoinase, ec:3.1.1.1 - ali-esterase, ec:1.17.4.1 - reductase, ec:2.4.2.10 - phosphoribosyltransferase, ec:3.2.1.31 - beta-glucuronide glucuronohydrolase glucuronidase, ec:3.6.1.23 - diphosphatase, ec:3.5.4.5 - deaminase, ec:6.3.5.2 - synthase (glutamine-hydrolysing), ec:2.3.1.5 - N-acetyltransferase, ec:2.4.1.17 - 1-naphthol glucuronyltransferase, ec:2.4.2.8…
TRINITY_DN595_c2_g1_i3	Drug metabolism - other enzymes, Bisphenol degradation, Nitrogen metabolism	map00983, map00363, map00910	20, 1, 7	ec:2.7.1.48 - kinase, ec:3.5.2.2 - hydantoinase, ec:3.1.1.1 - ali-esterase, ec:1.17.4.1 - reductase, ec:2.4.2.10 - phosphoribosyltransferase, ec:3.2.1.31 - beta-glucuronide glucuronohydrolase glucuronidase, ec:3.6.1.23 - diphosphatase, ec:3.5.4.5 - deaminase, ec:6.3.5.2 - synthase (glutamine-hydrolysing), ec:2.3.1.5 - N-acetyltransferase, ec:2.4.1.17 - 1-naphthol glucuronyltransferase, ec:2.4.2.8…
TRINITY_DN3976_c1_g2_i3	Other types of O-glycan biosynthesis, Mucin type O-glycan biosynthesis	map00514, map00512	8, 4	ec:2.4.1.122 - beta-1,3-galactosyltransferase, ec:2.4.1.222 - 3-beta-N-acetylglucosaminyltransferase, ec:2.4.1.109 - mannosyltransferase, ec:2.4.1.221 - GDP-L-fucose:polypeptide fucosyltransferase, ec:2.4.1.50 - galactosyltransferase, ec:2.4.1.66 - glucosyltransferase, ec:2.4.1.41 - N-acetylgalactosaminyltransferase, ec:2.4.99.1 - alpha-(2,6)-sialyltransferase, ec:2.4.99.4 - alpha-2,3-sialyltrans…
TRINITY_DN3976_c1_g2_i9	Other types of O-glycan biosynthesis, Mucin type O-glycan biosynthesis	map00514, map00512	8, 4	ec:2.4.1.122 - beta-1,3-galactosyltransferase, ec:2.4.1.222 - 3-beta-N-acetylglucosaminyltransferase, ec:2.4.1.109 - mannosyltransferase, ec:2.4.1.221 - GDP-L-fucose:polypeptide fucosyltransferase, ec:2.4.1.50 - galactosyltransferase, ec:2.4.1.66 - glucosyltransferase, ec:2.4.1.41 - N-acetylgalactosaminyltransferase, ec:2.4.99.1 - alpha-(2,6)-sialyltransferase, ec:2.4.99.4 - alpha-2,3-sialyltrans…
TRINITY_DN21897_c0_g1_i1	Galactose metabolism, Amino sugar and nucleotide sugar metabolism, Glycolysis / Gluconeogenesis, Streptomycin biosynthesis, Fructose and mannose metabolism, Starch and sucrose metabolism, Neomycin, kanamycin and gentamicin biosynthesis	map00052, map00520, map00010, map00521, map00051, map00500, map00524	19, 35, 27, 6, 21, 21, 2	ec:5.1.3.2 - 4-epimerase, ec:3.2.1.10 - limit dextrinase (erroneous), ec:3.2.1.26 - invertase, ec:2.7.7.64 - uridylyltransferase, ec:3.2.1.20 - maltase, ec:2.7.7.9 - uridylyltransferase, ec:1.1.1.21 - reductase, ec:2.7.1.2 - glucokinase (phosphorylating), ec:3.2.1.23 - lactase (ambiguous), ec:3.2.1.22 - melibiase, ec:5.4.2.2 - (alpha-D-glucose-1,6-bisphosphate-dependent), ec:2.7.1.11 - phosphohex…
TRINITY_DN3976_c1_g2_i8	Other types of O-glycan biosynthesis, Mucin type O-glycan biosynthesis	map00514, map00512	8, 4	ec:2.4.1.122 - beta-1,3-galactosyltransferase, ec:2.4.1.222 - 3-beta-N-acetylglucosaminyltransferase, ec:2.4.1.109 - mannosyltransferase, ec:2.4.1.221 - GDP-L-fucose:polypeptide fucosyltransferase, ec:2.4.1.50 - galactosyltransferase, ec:2.4.1.66 - glucosyltransferase, ec:2.4.1.41 - N-acetylgalactosaminyltransferase, ec:2.4.99.1 - alpha-(2,6)-sialyltransferase, ec:2.4.99.4 - alpha-2,3-sialyltrans…
TRINITY_DN3976_c1_g2_i6	Other types of O-glycan biosynthesis, Mucin type O-glycan biosynthesis	map00514, map00512	8, 4	ec:2.4.1.122 - beta-1,3-galactosyltransferase, ec:2.4.1.222 - 3-beta-N-acetylglucosaminyltransferase, ec:2.4.1.109 - mannosyltransferase, ec:2.4.1.221 - GDP-L-fucose:polypeptide fucosyltransferase, ec:2.4.1.50 - galactosyltransferase, ec:2.4.1.66 - glucosyltransferase, ec:2.4.1.41 - N-acetylgalactosaminyltransferase, ec:2.4.99.1 - alpha-(2,6)-sialyltransferase, ec:2.4.99.4 - alpha-2,3-sialyltrans…
TRINITY_DN68659_c1_g3_i1	Purine metabolism, Thiamine metabolism	map00230, map00730	54, 7	ec:3.6.1.15 - phosphatase, ec:4.6.1.2 - cyclase, ec:3.1.4.35 - phosphodiesterase, ec:3.5.4.10 - cyclohydrolase, ec:3.1.5.1 - deoxy-GTPase, ec:3.6.1.9 - diphosphatase, ec:3.5.4.3 - deaminase, ec:3.6.1.17 - (asymmetrical), ec:1.17.4.1 - reductase, ec:3.6.1.3 - adenylpyrophosphatase, ec:3.1.4.17 - phosphodiesterase, ec:4.3.2.2 - lyase, ec:1.7.1.7 - reductase, ec:1.17.1.4 - dehydrogenase, ec:2.7.7.4 …
TRINITY_DN42767_c2_g1_i3	Purine metabolism, Thiamine metabolism	map00230, map00730	54, 7	ec:3.6.1.15 - phosphatase, ec:4.6.1.2 - cyclase, ec:3.1.4.35 - phosphodiesterase, ec:3.5.4.10 - cyclohydrolase, ec:3.1.5.1 - deoxy-GTPase, ec:3.6.1.9 - diphosphatase, ec:3.5.4.3 - deaminase, ec:3.6.1.17 - (asymmetrical), ec:1.17.4.1 - reductase, ec:3.6.1.3 - adenylpyrophosphatase, ec:3.1.4.17 - phosphodiesterase, ec:4.3.2.2 - lyase, ec:1.7.1.7 - reductase, ec:1.17.1.4 - dehydrogenase, ec:2.7.7.4 …
TRINITY_DN215328_c0_g1_i1	Purine metabolism, Thiamine metabolism	map00230, map00730	54, 7	ec:3.6.1.15 - phosphatase, ec:4.6.1.2 - cyclase, ec:3.1.4.35 - phosphodiesterase, ec:3.5.4.10 - cyclohydrolase, ec:3.1.5.1 - deoxy-GTPase, ec:3.6.1.9 - diphosphatase, ec:3.5.4.3 - deaminase, ec:3.6.1.17 - (asymmetrical), ec:1.17.4.1 - reductase, ec:3.6.1.3 - adenylpyrophosphatase, ec:3.1.4.17 - phosphodiesterase, ec:4.3.2.2 - lyase, ec:1.7.1.7 - reductase, ec:1.17.1.4 - dehydrogenase, ec:2.7.7.4 …
TRINITY_DN213242_c0_g1_i1	Purine metabolism, Thiamine metabolism	map00230, map00730	54, 7	ec:3.6.1.15 - phosphatase, ec:4.6.1.2 - cyclase, ec:3.1.4.35 - phosphodiesterase, ec:3.5.4.10 - cyclohydrolase, ec:3.1.5.1 - deoxy-GTPase, ec:3.6.1.9 - diphosphatase, ec:3.5.4.3 - deaminase, ec:3.6.1.17 - (asymmetrical), ec:1.17.4.1 - reductase, ec:3.6.1.3 - adenylpyrophosphatase, ec:3.1.4.17 - phosphodiesterase, ec:4.3.2.2 - lyase, ec:1.7.1.7 - reductase, ec:1.17.1.4 - dehydrogenase, ec:2.7.7.4 …
TRINITY_DN52410_c0_g1_i2	Pyrimidine metabolism, Drug metabolism - other enzymes	map00240, map00983	29, 20	ec:2.7.1.48 - kinase, ec:3.5.2.2 - hydantoinase, ec:1.3.5.2 - dehydrogenase (quinone), ec:3.6.1.9 - diphosphatase, ec:6.3.4.2 - synthase (glutamine hydrolysing), ec:2.1.1.45 - synthase, ec:3.6.1.17 - (asymmetrical), ec:1.17.4.1 - reductase, ec:2.1.3.2 - carbamoyltransferase, ec:2.4.2.10 - phosphoribosyltransferase, ec:3.6.1.12 - diphosphatase, ec:3.5.4.12 - deaminase, ec:3.6.1.23 - diphosphatase,…
TRINITY_DN18950_c0_g1_i1	Purine metabolism, Thiamine metabolism	map00230, map00730	54, 7	ec:3.6.1.15 - phosphatase, ec:4.6.1.2 - cyclase, ec:3.1.4.35 - phosphodiesterase, ec:3.5.4.10 - cyclohydrolase, ec:3.1.5.1 - deoxy-GTPase, ec:3.6.1.9 - diphosphatase, ec:3.5.4.3 - deaminase, ec:3.6.1.17 - (asymmetrical), ec:1.17.4.1 - reductase, ec:3.6.1.3 - adenylpyrophosphatase, ec:3.1.4.17 - phosphodiesterase, ec:4.3.2.2 - lyase, ec:1.7.1.7 - reductase, ec:1.17.1.4 - dehydrogenase, ec:2.7.7.4 …
TRINITY_DN213299_c0_g1_i1	Purine metabolism, Thiamine metabolism	map00230, map00730	54, 7	ec:3.6.1.15 - phosphatase, ec:4.6.1.2 - cyclase, ec:3.1.4.35 - phosphodiesterase, ec:3.5.4.10 - cyclohydrolase, ec:3.1.5.1 - deoxy-GTPase, ec:3.6.1.9 - diphosphatase, ec:3.5.4.3 - deaminase, ec:3.6.1.17 - (asymmetrical), ec:1.17.4.1 - reductase, ec:3.6.1.3 - adenylpyrophosphatase, ec:3.1.4.17 - phosphodiesterase, ec:4.3.2.2 - lyase, ec:1.7.1.7 - reductase, ec:1.17.1.4 - dehydrogenase, ec:2.7.7.4 …
TRINITY_DN89600_c0_g1_i1	Amino sugar and nucleotide sugar metabolism, Ascorbate and aldarate metabolism, Pentose and glucuronate interconversions	map00520, map00053, map00040	35, 8, 15	ec:2.6.1.16 - transaminase (isomerizing), ec:5.1.3.2 - 4-epimerase, ec:5.1.3.14 - 2-epimerase (non-hydrolysing), ec:1.1.1.271 - synthase, ec:2.7.7.64 - uridylyltransferase, ec:4.1.3.3 - lyase, ec:2.7.7.9 - uridylyltransferase, ec:4.2.1.47 - 4,6-dehydratase, ec:2.7.1.7 - mannokinase (phosphorylating), ec:3.5.99.6 - deaminase, ec:2.7.1.2 - glucokinase (phosphorylating), ec:5.4.2.8 - mannose phospho…
TRINITY_DN2409_c0_g1_i5	Aminoacyl-tRNA biosynthesis	map00970	22	ec:6.1.1.22 - ligase, ec:6.1.1.19 - ligase, ec:2.1.2.9 - formyltransferase, ec:6.1.1.9 - ligase, ec:6.1.1.3 - ligase, ec:6.1.1.15 - ligase, ec:6.1.1.5 - ligase, ec:6.1.1.10 - ligase, ec:6.1.1.21 - ligase, ec:6.1.1.18 - ligase, ec:6.1.1.7 - ligase, ec:6.1.1.12 - ligase, ec:6.1.1.2 - ligase, ec:6.3.5.7 - synthase (glutamine-hydrolysing), ec:6.1.1.14 - ligase, ec:6.1.1.4 - ligase, ec:6.1.1.20 - liga…
TRINITY_DN2409_c0_g1_i6	Aminoacyl-tRNA biosynthesis	map00970	22	ec:6.1.1.22 - ligase, ec:6.1.1.19 - ligase, ec:2.1.2.9 - formyltransferase, ec:6.1.1.9 - ligase, ec:6.1.1.3 - ligase, ec:6.1.1.15 - ligase, ec:6.1.1.5 - ligase, ec:6.1.1.10 - ligase, ec:6.1.1.21 - ligase, ec:6.1.1.18 - ligase, ec:6.1.1.7 - ligase, ec:6.1.1.12 - ligase, ec:6.1.1.2 - ligase, ec:6.3.5.7 - synthase (glutamine-hydrolysing), ec:6.1.1.14 - ligase, ec:6.1.1.4 - ligase, ec:6.1.1.20 - liga…
TRINITY_DN376_c1_g1_i9	Pyrimidine metabolism, Drug metabolism - other enzymes	map00240, map00983	29, 20	ec:2.7.1.48 - kinase, ec:3.5.2.2 - hydantoinase, ec:1.3.5.2 - dehydrogenase (quinone), ec:3.6.1.9 - diphosphatase, ec:6.3.4.2 - synthase (glutamine hydrolysing), ec:2.1.1.45 - synthase, ec:3.6.1.17 - (asymmetrical), ec:1.17.4.1 - reductase, ec:2.1.3.2 - carbamoyltransferase, ec:2.4.2.10 - phosphoribosyltransferase, ec:3.6.1.12 - diphosphatase, ec:3.5.4.12 - deaminase, ec:3.6.1.23 - diphosphatase,…
TRINITY_DN2409_c0_g1_i1	Aminoacyl-tRNA biosynthesis	map00970	22	ec:6.1.1.22 - ligase, ec:6.1.1.19 - ligase, ec:2.1.2.9 - formyltransferase, ec:6.1.1.9 - ligase, ec:6.1.1.3 - ligase, ec:6.1.1.15 - ligase, ec:6.1.1.5 - ligase, ec:6.1.1.10 - ligase, ec:6.1.1.21 - ligase, ec:6.1.1.18 - ligase, ec:6.1.1.7 - ligase, ec:6.1.1.12 - ligase, ec:6.1.1.2 - ligase, ec:6.3.5.7 - synthase (glutamine-hydrolysing), ec:6.1.1.14 - ligase, ec:6.1.1.4 - ligase, ec:6.1.1.20 - liga…
TRINITY_DN1941_c0_g2_i2	Amino sugar and nucleotide sugar metabolism	map00520	35	ec:2.6.1.16 - transaminase (isomerizing), ec:5.1.3.2 - 4-epimerase, ec:5.1.3.14 - 2-epimerase (non-hydrolysing), ec:1.1.1.271 - synthase, ec:2.7.7.64 - uridylyltransferase, ec:4.1.3.3 - lyase, ec:2.7.7.9 - uridylyltransferase, ec:4.2.1.47 - 4,6-dehydratase, ec:2.7.1.7 - mannokinase (phosphorylating), ec:3.5.99.6 - deaminase, ec:2.7.1.2 - glucokinase (phosphorylating), ec:5.4.2.8 - mannose phospho…
TRINITY_DN2409_c0_g1_i3	Aminoacyl-tRNA biosynthesis	map00970	22	ec:6.1.1.22 - ligase, ec:6.1.1.19 - ligase, ec:2.1.2.9 - formyltransferase, ec:6.1.1.9 - ligase, ec:6.1.1.3 - ligase, ec:6.1.1.15 - ligase, ec:6.1.1.5 - ligase, ec:6.1.1.10 - ligase, ec:6.1.1.21 - ligase, ec:6.1.1.18 - ligase, ec:6.1.1.7 - ligase, ec:6.1.1.12 - ligase, ec:6.1.1.2 - ligase, ec:6.3.5.7 - synthase (glutamine-hydrolysing), ec:6.1.1.14 - ligase, ec:6.1.1.4 - ligase, ec:6.1.1.20 - liga…
TRINITY_DN2409_c0_g1_i2	Aminoacyl-tRNA biosynthesis	map00970	22	ec:6.1.1.22 - ligase, ec:6.1.1.19 - ligase, ec:2.1.2.9 - formyltransferase, ec:6.1.1.9 - ligase, ec:6.1.1.3 - ligase, ec:6.1.1.15 - ligase, ec:6.1.1.5 - ligase, ec:6.1.1.10 - ligase, ec:6.1.1.21 - ligase, ec:6.1.1.18 - ligase, ec:6.1.1.7 - ligase, ec:6.1.1.12 - ligase, ec:6.1.1.2 - ligase, ec:6.3.5.7 - synthase (glutamine-hydrolysing), ec:6.1.1.14 - ligase, ec:6.1.1.4 - ligase, ec:6.1.1.20 - liga…
TRINITY_DN1941_c0_g2_i6	Amino sugar and nucleotide sugar metabolism	map00520	35	ec:2.6.1.16 - transaminase (isomerizing), ec:5.1.3.2 - 4-epimerase, ec:5.1.3.14 - 2-epimerase (non-hydrolysing), ec:1.1.1.271 - synthase, ec:2.7.7.64 - uridylyltransferase, ec:4.1.3.3 - lyase, ec:2.7.7.9 - uridylyltransferase, ec:4.2.1.47 - 4,6-dehydratase, ec:2.7.1.7 - mannokinase (phosphorylating), ec:3.5.99.6 - deaminase, ec:2.7.1.2 - glucokinase (phosphorylating), ec:5.4.2.8 - mannose phospho…
TRINITY_DN1941_c0_g2_i3	Amino sugar and nucleotide sugar metabolism	map00520	35	ec:2.6.1.16 - transaminase (isomerizing), ec:5.1.3.2 - 4-epimerase, ec:5.1.3.14 - 2-epimerase (non-hydrolysing), ec:1.1.1.271 - synthase, ec:2.7.7.64 - uridylyltransferase, ec:4.1.3.3 - lyase, ec:2.7.7.9 - uridylyltransferase, ec:4.2.1.47 - 4,6-dehydratase, ec:2.7.1.7 - mannokinase (phosphorylating), ec:3.5.99.6 - deaminase, ec:2.7.1.2 - glucokinase (phosphorylating), ec:5.4.2.8 - mannose phospho…
TRINITY_DN1941_c0_g2_i4	Amino sugar and nucleotide sugar metabolism	map00520	35	ec:2.6.1.16 - transaminase (isomerizing), ec:5.1.3.2 - 4-epimerase, ec:5.1.3.14 - 2-epimerase (non-hydrolysing), ec:1.1.1.271 - synthase, ec:2.7.7.64 - uridylyltransferase, ec:4.1.3.3 - lyase, ec:2.7.7.9 - uridylyltransferase, ec:4.2.1.47 - 4,6-dehydratase, ec:2.7.1.7 - mannokinase (phosphorylating), ec:3.5.99.6 - deaminase, ec:2.7.1.2 - glucokinase (phosphorylating), ec:5.4.2.8 - mannose phospho…
TRINITY_DN1941_c0_g2_i9	Amino sugar and nucleotide sugar metabolism	map00520	35	ec:2.6.1.16 - transaminase (isomerizing), ec:5.1.3.2 - 4-epimerase, ec:5.1.3.14 - 2-epimerase (non-hydrolysing), ec:1.1.1.271 - synthase, ec:2.7.7.64 - uridylyltransferase, ec:4.1.3.3 - lyase, ec:2.7.7.9 - uridylyltransferase, ec:4.2.1.47 - 4,6-dehydratase, ec:2.7.1.7 - mannokinase (phosphorylating), ec:3.5.99.6 - deaminase, ec:2.7.1.2 - glucokinase (phosphorylating), ec:5.4.2.8 - mannose phospho…
TRINITY_DN2409_c0_g1_i9	Aminoacyl-tRNA biosynthesis	map00970	22	ec:6.1.1.22 - ligase, ec:6.1.1.19 - ligase, ec:2.1.2.9 - formyltransferase, ec:6.1.1.9 - ligase, ec:6.1.1.3 - ligase, ec:6.1.1.15 - ligase, ec:6.1.1.5 - ligase, ec:6.1.1.10 - ligase, ec:6.1.1.21 - ligase, ec:6.1.1.18 - ligase, ec:6.1.1.7 - ligase, ec:6.1.1.12 - ligase, ec:6.1.1.2 - ligase, ec:6.3.5.7 - synthase (glutamine-hydrolysing), ec:6.1.1.14 - ligase, ec:6.1.1.4 - ligase, ec:6.1.1.20 - liga…
TRINITY_DN1941_c0_g2_i8	Amino sugar and nucleotide sugar metabolism	map00520	35	ec:2.6.1.16 - transaminase (isomerizing), ec:5.1.3.2 - 4-epimerase, ec:5.1.3.14 - 2-epimerase (non-hydrolysing), ec:1.1.1.271 - synthase, ec:2.7.7.64 - uridylyltransferase, ec:4.1.3.3 - lyase, ec:2.7.7.9 - uridylyltransferase, ec:4.2.1.47 - 4,6-dehydratase, ec:2.7.1.7 - mannokinase (phosphorylating), ec:3.5.99.6 - deaminase, ec:2.7.1.2 - glucokinase (phosphorylating), ec:5.4.2.8 - mannose phospho…
TRINITY_DN248365_c0_g1_i1	Purine metabolism, Thiamine metabolism	map00230, map00730	54, 7	ec:3.6.1.15 - phosphatase, ec:4.6.1.2 - cyclase, ec:3.1.4.35 - phosphodiesterase, ec:3.5.4.10 - cyclohydrolase, ec:3.1.5.1 - deoxy-GTPase, ec:3.6.1.9 - diphosphatase, ec:3.5.4.3 - deaminase, ec:3.6.1.17 - (asymmetrical), ec:1.17.4.1 - reductase, ec:3.6.1.3 - adenylpyrophosphatase, ec:3.1.4.17 - phosphodiesterase, ec:4.3.2.2 - lyase, ec:1.7.1.7 - reductase, ec:1.17.1.4 - dehydrogenase, ec:2.7.7.4 …
TRINITY_DN104469_c0_g1_i2	Other types of O-glycan biosynthesis	map00514	8	ec:2.4.1.122 - beta-1,3-galactosyltransferase, ec:2.4.1.222 - 3-beta-N-acetylglucosaminyltransferase, ec:2.4.1.109 - mannosyltransferase, ec:2.4.1.221 - GDP-L-fucose:polypeptide fucosyltransferase, ec:2.4.1.50 - galactosyltransferase, ec:2.4.1.66 - glucosyltransferase, ec:2.4.1.41 - N-acetylgalactosaminyltransferase, ec:2.4.99.1 - alpha-(2,6)-sialyltransferase
TRINITY_DN104469_c0_g1_i3	Other types of O-glycan biosynthesis	map00514	8	ec:2.4.1.122 - beta-1,3-galactosyltransferase, ec:2.4.1.222 - 3-beta-N-acetylglucosaminyltransferase, ec:2.4.1.109 - mannosyltransferase, ec:2.4.1.221 - GDP-L-fucose:polypeptide fucosyltransferase, ec:2.4.1.50 - galactosyltransferase, ec:2.4.1.66 - glucosyltransferase, ec:2.4.1.41 - N-acetylgalactosaminyltransferase, ec:2.4.99.1 - alpha-(2,6)-sialyltransferase
TRINITY_DN104469_c0_g1_i5	Other types of O-glycan biosynthesis	map00514	8	ec:2.4.1.122 - beta-1,3-galactosyltransferase, ec:2.4.1.222 - 3-beta-N-acetylglucosaminyltransferase, ec:2.4.1.109 - mannosyltransferase, ec:2.4.1.221 - GDP-L-fucose:polypeptide fucosyltransferase, ec:2.4.1.50 - galactosyltransferase, ec:2.4.1.66 - glucosyltransferase, ec:2.4.1.41 - N-acetylgalactosaminyltransferase, ec:2.4.99.1 - alpha-(2,6)-sialyltransferase
TRINITY_DN104469_c0_g1_i6	Other types of O-glycan biosynthesis	map00514	8	ec:2.4.1.122 - beta-1,3-galactosyltransferase, ec:2.4.1.222 - 3-beta-N-acetylglucosaminyltransferase, ec:2.4.1.109 - mannosyltransferase, ec:2.4.1.221 - GDP-L-fucose:polypeptide fucosyltransferase, ec:2.4.1.50 - galactosyltransferase, ec:2.4.1.66 - glucosyltransferase, ec:2.4.1.41 - N-acetylgalactosaminyltransferase, ec:2.4.99.1 - alpha-(2,6)-sialyltransferase
TRINITY_DN27432_c1_g1_i1	Purine metabolism, Thiamine metabolism	map00230, map00730	54, 7	ec:3.6.1.15 - phosphatase, ec:4.6.1.2 - cyclase, ec:3.1.4.35 - phosphodiesterase, ec:3.5.4.10 - cyclohydrolase, ec:3.1.5.1 - deoxy-GTPase, ec:3.6.1.9 - diphosphatase, ec:3.5.4.3 - deaminase, ec:3.6.1.17 - (asymmetrical), ec:1.17.4.1 - reductase, ec:3.6.1.3 - adenylpyrophosphatase, ec:3.1.4.17 - phosphodiesterase, ec:4.3.2.2 - lyase, ec:1.7.1.7 - reductase, ec:1.17.1.4 - dehydrogenase, ec:2.7.7.4 …
TRINITY_DN2882_c0_g1_i10	Terpenoid backbone biosynthesis	map00900	16	ec:2.7.4.2 - kinase, ec:2.5.1.84 - diphosphate synthase [geranyl-diphosphate specific], ec:1.8.3.5 - oxidase, ec:2.3.3.10 - synthase, ec:2.5.1.58 - farnesyltransferase, ec:2.7.1.36 - kinase, ec:1.1.1.34 - reductase (NADPH), ec:2.1.1.100 - O-methyltransferase, ec:4.1.1.33 - decarboxylase, ec:2.5.1.10 - diphosphate synthase, ec:2.5.1.85 - diphosphate synthase [geranylgeranyl-diphosphate specific], …
TRINITY_DN2882_c0_g1_i11	Terpenoid backbone biosynthesis	map00900	16	ec:2.7.4.2 - kinase, ec:2.5.1.84 - diphosphate synthase [geranyl-diphosphate specific], ec:1.8.3.5 - oxidase, ec:2.3.3.10 - synthase, ec:2.5.1.58 - farnesyltransferase, ec:2.7.1.36 - kinase, ec:1.1.1.34 - reductase (NADPH), ec:2.1.1.100 - O-methyltransferase, ec:4.1.1.33 - decarboxylase, ec:2.5.1.10 - diphosphate synthase, ec:2.5.1.85 - diphosphate synthase [geranylgeranyl-diphosphate specific], …
TRINITY_DN21136_c0_g1_i2	Glycerophospholipid metabolism	map00564	30	ec:3.1.4.4 - D, ec:2.7.7.15 - cytidylyltransferase, ec:2.3.1.51 - O-acyltransferase, ec:2.7.8.5 - 1-phosphatidyltransferase, ec:2.3.1.23 - O-acyltransferase, ec:2.3.1.42 - O-acyltransferase, ec:2.7.8.11 - 3-phosphatidyltransferase, ec:2.1.1.17 - N-methyltransferase, ec:1.1.1.8 - dehydrogenase (NAD+), ec:4.1.1.65 - decarboxylase, ec:2.7.8.1 - EPT, ec:2.7.7.41 - cytidylyltransferase, ec:2.7.1.107 -…
TRINITY_DN104469_c0_g1_i7	Other types of O-glycan biosynthesis	map00514	8	ec:2.4.1.122 - beta-1,3-galactosyltransferase, ec:2.4.1.222 - 3-beta-N-acetylglucosaminyltransferase, ec:2.4.1.109 - mannosyltransferase, ec:2.4.1.221 - GDP-L-fucose:polypeptide fucosyltransferase, ec:2.4.1.50 - galactosyltransferase, ec:2.4.1.66 - glucosyltransferase, ec:2.4.1.41 - N-acetylgalactosaminyltransferase, ec:2.4.99.1 - alpha-(2,6)-sialyltransferase
TRINITY_DN440_c7_g1_i7	T cell receptor signaling pathway, PD-L1 expression and PD-1 checkpoint pathway in cancer, Th1 and Th2 cell differentiation, Phosphatidylinositol signaling system, Inositol phosphate metabolism	map04660, map05235, map04658, map04070, map00562	2, 1, 1, 24, 25	ec:2.7.10.2 - protein-tyrosine kinase, ec:3.1.3.16 - phosphatase, ec:3.1.3.16 - phosphatase, ec:3.1.3.16 - phosphatase, ec:2.7.1.127 - 3-kinase, ec:2.7.1.158 - 2-kinase, ec:2.7.1.67 - 4-kinase, ec:2.7.4.24 - kinase, ec:2.7.1.149 - 4-kinase, ec:2.7.8.11 - 3-phosphatidyltransferase, ec:3.1.3.56 - 5-phosphatase, ec:2.7.1.154 - 3-kinase, ec:2.7.7.41 - cytidylyltransferase, ec:2.7.4.21 - kinase, ec:3.…
TRINITY_DN104469_c0_g1_i8	Other types of O-glycan biosynthesis	map00514	8	ec:2.4.1.122 - beta-1,3-galactosyltransferase, ec:2.4.1.222 - 3-beta-N-acetylglucosaminyltransferase, ec:2.4.1.109 - mannosyltransferase, ec:2.4.1.221 - GDP-L-fucose:polypeptide fucosyltransferase, ec:2.4.1.50 - galactosyltransferase, ec:2.4.1.66 - glucosyltransferase, ec:2.4.1.41 - N-acetylgalactosaminyltransferase, ec:2.4.99.1 - alpha-(2,6)-sialyltransferase
TRINITY_DN440_c7_g1_i6	T cell receptor signaling pathway, PD-L1 expression and PD-1 checkpoint pathway in cancer, Th1 and Th2 cell differentiation, Phosphatidylinositol signaling system, Inositol phosphate metabolism	map04660, map05235, map04658, map04070, map00562	2, 1, 1, 24, 25	ec:2.7.10.2 - protein-tyrosine kinase, ec:3.1.3.16 - phosphatase, ec:3.1.3.16 - phosphatase, ec:3.1.3.16 - phosphatase, ec:2.7.1.127 - 3-kinase, ec:2.7.1.158 - 2-kinase, ec:2.7.1.67 - 4-kinase, ec:2.7.4.24 - kinase, ec:2.7.1.149 - 4-kinase, ec:2.7.8.11 - 3-phosphatidyltransferase, ec:3.1.3.56 - 5-phosphatase, ec:2.7.1.154 - 3-kinase, ec:2.7.7.41 - cytidylyltransferase, ec:2.7.4.21 - kinase, ec:3.…
TRINITY_DN45963_c0_g1_i1	Purine metabolism, Thiamine metabolism	map00230, map00730	54, 7	ec:3.6.1.15 - phosphatase, ec:4.6.1.2 - cyclase, ec:3.1.4.35 - phosphodiesterase, ec:3.5.4.10 - cyclohydrolase, ec:3.1.5.1 - deoxy-GTPase, ec:3.6.1.9 - diphosphatase, ec:3.5.4.3 - deaminase, ec:3.6.1.17 - (asymmetrical), ec:1.17.4.1 - reductase, ec:3.6.1.3 - adenylpyrophosphatase, ec:3.1.4.17 - phosphodiesterase, ec:4.3.2.2 - lyase, ec:1.7.1.7 - reductase, ec:1.17.1.4 - dehydrogenase, ec:2.7.7.4 …
TRINITY_DN440_c7_g1_i2	T cell receptor signaling pathway, PD-L1 expression and PD-1 checkpoint pathway in cancer, Th1 and Th2 cell differentiation, Phosphatidylinositol signaling system, Inositol phosphate metabolism	map04660, map05235, map04658, map04070, map00562	2, 1, 1, 24, 25	ec:2.7.10.2 - protein-tyrosine kinase, ec:3.1.3.16 - phosphatase, ec:3.1.3.16 - phosphatase, ec:3.1.3.16 - phosphatase, ec:2.7.1.127 - 3-kinase, ec:2.7.1.158 - 2-kinase, ec:2.7.1.67 - 4-kinase, ec:2.7.4.24 - kinase, ec:2.7.1.149 - 4-kinase, ec:2.7.8.11 - 3-phosphatidyltransferase, ec:3.1.3.56 - 5-phosphatase, ec:2.7.1.154 - 3-kinase, ec:2.7.7.41 - cytidylyltransferase, ec:2.7.4.21 - kinase, ec:3.…
TRINITY_DN440_c7_g1_i5	T cell receptor signaling pathway, PD-L1 expression and PD-1 checkpoint pathway in cancer, Th1 and Th2 cell differentiation, Phosphatidylinositol signaling system, Inositol phosphate metabolism	map04660, map05235, map04658, map04070, map00562	2, 1, 1, 24, 25	ec:2.7.10.2 - protein-tyrosine kinase, ec:3.1.3.16 - phosphatase, ec:3.1.3.16 - phosphatase, ec:3.1.3.16 - phosphatase, ec:2.7.1.127 - 3-kinase, ec:2.7.1.158 - 2-kinase, ec:2.7.1.67 - 4-kinase, ec:2.7.4.24 - kinase, ec:2.7.1.149 - 4-kinase, ec:2.7.8.11 - 3-phosphatidyltransferase, ec:3.1.3.56 - 5-phosphatase, ec:2.7.1.154 - 3-kinase, ec:2.7.7.41 - cytidylyltransferase, ec:2.7.4.21 - kinase, ec:3.…
TRINITY_DN195_c0_g1_i8	Carbon fixation pathways in prokaryotes, Propanoate metabolism, Valine, leucine and isoleucine degradation, Fatty acid degradation, Limonene and pinene degradation, Tryptophan metabolism, Phenylalanine metabolism, Lysine degradation, Caprolactam degradation, Geraniol degradation, alpha-Linolenic acid metabolism, Benzoate degradation, Fatty acid elongation, Aminobenzoate degradation, Butanoate met…	map00720, map00640, map00280, map00071, map00903, map00380, map00360, map00310, map00930, map00281, map00592, map00362, map00062, map00627, map00650, map00410	21, 21, 22, 13, 2, 17, 9, 18, 3, 4, 6, 4, 12, 3, 13, 12	ec:1.1.1.35 - dehydrogenase, ec:6.2.1.1 - ligase, ec:6.4.1.3 - carboxylase, ec:4.1.3.25 - lyase, ec:1.5.1.5 - dehydrogenase (NADP+), ec:1.1.1.37 - dehydrogenase, ec:1.1.1.42 - dehydrogenase (NADP+), ec:6.2.1.5 - ligase (ADP-forming), ec:5.1.99.1 - epimerase, ec:1.3.5.1 - dehydrogenase, ec:6.4.1.2 - carboxylase, ec:2.3.3.8 - citrate synthase, ec:1.5.1.20 - reductase [NAD(P)H], ec:5.4.99.2 - mutase…
TRINITY_DN195_c0_g1_i7	Carbon fixation pathways in prokaryotes, Propanoate metabolism, Valine, leucine and isoleucine degradation, Fatty acid degradation, Limonene and pinene degradation, Tryptophan metabolism, Phenylalanine metabolism, Lysine degradation, Caprolactam degradation, Geraniol degradation, alpha-Linolenic acid metabolism, Benzoate degradation, Fatty acid elongation, Aminobenzoate degradation, Butanoate met…	map00720, map00640, map00280, map00071, map00903, map00380, map00360, map00310, map00930, map00281, map00592, map00362, map00062, map00627, map00650, map00410	21, 21, 22, 13, 2, 17, 9, 18, 3, 4, 6, 4, 12, 3, 13, 12	ec:1.1.1.35 - dehydrogenase, ec:6.2.1.1 - ligase, ec:6.4.1.3 - carboxylase, ec:4.1.3.25 - lyase, ec:1.5.1.5 - dehydrogenase (NADP+), ec:1.1.1.37 - dehydrogenase, ec:1.1.1.42 - dehydrogenase (NADP+), ec:6.2.1.5 - ligase (ADP-forming), ec:5.1.99.1 - epimerase, ec:1.3.5.1 - dehydrogenase, ec:6.4.1.2 - carboxylase, ec:2.3.3.8 - citrate synthase, ec:1.5.1.20 - reductase [NAD(P)H], ec:5.4.99.2 - mutase…
TRINITY_DN4803_c0_g1_i14	Drug metabolism - other enzymes, Nitrotoluene degradation, Caffeine metabolism	map00983, map00633, map00232	20, 1, 3	ec:2.7.1.48 - kinase, ec:3.5.2.2 - hydantoinase, ec:3.1.1.1 - ali-esterase, ec:1.17.4.1 - reductase, ec:2.4.2.10 - phosphoribosyltransferase, ec:3.2.1.31 - beta-glucuronide glucuronohydrolase glucuronidase, ec:3.6.1.23 - diphosphatase, ec:3.5.4.5 - deaminase, ec:6.3.5.2 - synthase (glutamine-hydrolysing), ec:2.3.1.5 - N-acetyltransferase, ec:2.4.1.17 - 1-naphthol glucuronyltransferase, ec:2.4.2.8…
TRINITY_DN45967_c2_g1_i1	Purine metabolism, Thiamine metabolism	map00230, map00730	54, 7	ec:3.6.1.15 - phosphatase, ec:4.6.1.2 - cyclase, ec:3.1.4.35 - phosphodiesterase, ec:3.5.4.10 - cyclohydrolase, ec:3.1.5.1 - deoxy-GTPase, ec:3.6.1.9 - diphosphatase, ec:3.5.4.3 - deaminase, ec:3.6.1.17 - (asymmetrical), ec:1.17.4.1 - reductase, ec:3.6.1.3 - adenylpyrophosphatase, ec:3.1.4.17 - phosphodiesterase, ec:4.3.2.2 - lyase, ec:1.7.1.7 - reductase, ec:1.17.1.4 - dehydrogenase, ec:2.7.7.4 …
TRINITY_DN7494_c0_g1_i11	Purine metabolism, Thiamine metabolism	map00230, map00730	54, 7	ec:3.6.1.15 - phosphatase, ec:4.6.1.2 - cyclase, ec:3.1.4.35 - phosphodiesterase, ec:3.5.4.10 - cyclohydrolase, ec:3.1.5.1 - deoxy-GTPase, ec:3.6.1.9 - diphosphatase, ec:3.5.4.3 - deaminase, ec:3.6.1.17 - (asymmetrical), ec:1.17.4.1 - reductase, ec:3.6.1.3 - adenylpyrophosphatase, ec:3.1.4.17 - phosphodiesterase, ec:4.3.2.2 - lyase, ec:1.7.1.7 - reductase, ec:1.17.1.4 - dehydrogenase, ec:2.7.7.4 …
TRINITY_DN7494_c0_g1_i10	Purine metabolism, Thiamine metabolism	map00230, map00730	54, 7	ec:3.6.1.15 - phosphatase, ec:4.6.1.2 - cyclase, ec:3.1.4.35 - phosphodiesterase, ec:3.5.4.10 - cyclohydrolase, ec:3.1.5.1 - deoxy-GTPase, ec:3.6.1.9 - diphosphatase, ec:3.5.4.3 - deaminase, ec:3.6.1.17 - (asymmetrical), ec:1.17.4.1 - reductase, ec:3.6.1.3 - adenylpyrophosphatase, ec:3.1.4.17 - phosphodiesterase, ec:4.3.2.2 - lyase, ec:1.7.1.7 - reductase, ec:1.17.1.4 - dehydrogenase, ec:2.7.7.4 …
TRINITY_DN1635_c0_g2_i1	D-Glutamine and D-glutamate metabolism	map00471	4	ec:5.1.1.10 - racemase, ec:4.2.1.48 - cyclase, ec:3.5.1.2 - glutaminase I, ec:1.4.1.3 - dehydrogenase [NAD(P)+]
TRINITY_DN17032_c0_g3_i1	Citrate cycle (TCA cycle), Tryptophan metabolism, Lysine degradation	map00020, map00380, map00310	17, 17, 18	ec:4.1.1.32 - carboxykinase (GTP), ec:2.3.1.12 - acetyltransferase, ec:1.2.4.2 - dehydrogenase (succinyl-transferring), ec:2.3.1.61 - succinyltransferase, ec:1.8.1.4 - dehydrogenase, ec:1.1.1.37 - dehydrogenase, ec:1.1.1.42 - dehydrogenase (NADP+), ec:2.3.3.1 - (Si)-synthase, ec:6.2.1.5 - ligase (ADP-forming), ec:1.3.5.1 - dehydrogenase, ec:1.2.4.1 - dehydrogenase (acetyl-transferring), ec:2.3.3.…
TRINITY_DN63775_c0_g1_i1	Purine metabolism, Thiamine metabolism	map00230, map00730	54, 7	ec:3.6.1.15 - phosphatase, ec:4.6.1.2 - cyclase, ec:3.1.4.35 - phosphodiesterase, ec:3.5.4.10 - cyclohydrolase, ec:3.1.5.1 - deoxy-GTPase, ec:3.6.1.9 - diphosphatase, ec:3.5.4.3 - deaminase, ec:3.6.1.17 - (asymmetrical), ec:1.17.4.1 - reductase, ec:3.6.1.3 - adenylpyrophosphatase, ec:3.1.4.17 - phosphodiesterase, ec:4.3.2.2 - lyase, ec:1.7.1.7 - reductase, ec:1.17.1.4 - dehydrogenase, ec:2.7.7.4 …
TRINITY_DN2080_c0_g1_i12	Terpenoid backbone biosynthesis, Biosynthesis of unsaturated fatty acids, Carbon fixation pathways in prokaryotes, Propanoate metabolism, Valine, leucine and isoleucine degradation, Fatty acid degradation, Tryptophan metabolism, Glyoxylate and dicarboxylate metabolism, Lysine degradation, Geraniol degradation, Pyruvate metabolism, alpha-Linolenic acid metabolism, Ethylbenzene degradation, Synthes…	map00900, map01040, map00720, map00640, map00280, map00071, map00380, map00630, map00310, map00281, map00620, map00592, map00642, map00072, map00362, map00062, map00650	16, 9, 21, 21, 22, 13, 17, 18, 18, 4, 24, 6, 1, 5, 4, 12, 13	ec:2.7.4.2 - kinase, ec:2.5.1.84 - diphosphate synthase [geranyl-diphosphate specific], ec:1.8.3.5 - oxidase, ec:2.3.3.10 - synthase, ec:2.5.1.58 - farnesyltransferase, ec:2.7.1.36 - kinase, ec:1.1.1.34 - reductase (NADPH), ec:2.1.1.100 - O-methyltransferase, ec:4.1.1.33 - decarboxylase, ec:2.5.1.10 - diphosphate synthase, ec:2.5.1.85 - diphosphate synthase [geranylgeranyl-diphosphate specific], …
TRINITY_DN2080_c0_g1_i11	Terpenoid backbone biosynthesis, Biosynthesis of unsaturated fatty acids, Carbon fixation pathways in prokaryotes, Propanoate metabolism, Valine, leucine and isoleucine degradation, Fatty acid degradation, Tryptophan metabolism, Glyoxylate and dicarboxylate metabolism, Lysine degradation, Geraniol degradation, Pyruvate metabolism, alpha-Linolenic acid metabolism, Ethylbenzene degradation, Synthes…	map00900, map01040, map00720, map00640, map00280, map00071, map00380, map00630, map00310, map00281, map00620, map00592, map00642, map00072, map00362, map00062, map00650	16, 9, 21, 21, 22, 13, 17, 18, 18, 4, 24, 6, 1, 5, 4, 12, 13	ec:2.7.4.2 - kinase, ec:2.5.1.84 - diphosphate synthase [geranyl-diphosphate specific], ec:1.8.3.5 - oxidase, ec:2.3.3.10 - synthase, ec:2.5.1.58 - farnesyltransferase, ec:2.7.1.36 - kinase, ec:1.1.1.34 - reductase (NADPH), ec:2.1.1.100 - O-methyltransferase, ec:4.1.1.33 - decarboxylase, ec:2.5.1.10 - diphosphate synthase, ec:2.5.1.85 - diphosphate synthase [geranylgeranyl-diphosphate specific], …
TRINITY_DN5500_c0_g1_i3	T cell receptor signaling pathway, PD-L1 expression and PD-1 checkpoint pathway in cancer, Th1 and Th2 cell differentiation	map04660, map05235, map04658	2, 1, 1	ec:2.7.10.2 - protein-tyrosine kinase, ec:3.1.3.16 - phosphatase, ec:3.1.3.16 - phosphatase, ec:3.1.3.16 - phosphatase
TRINITY_DN5500_c0_g1_i2	T cell receptor signaling pathway, PD-L1 expression and PD-1 checkpoint pathway in cancer, Th1 and Th2 cell differentiation	map04660, map05235, map04658	2, 1, 1	ec:2.7.10.2 - protein-tyrosine kinase, ec:3.1.3.16 - phosphatase, ec:3.1.3.16 - phosphatase, ec:3.1.3.16 - phosphatase
TRINITY_DN5500_c0_g1_i1	T cell receptor signaling pathway, PD-L1 expression and PD-1 checkpoint pathway in cancer, Th1 and Th2 cell differentiation	map04660, map05235, map04658	2, 1, 1	ec:2.7.10.2 - protein-tyrosine kinase, ec:3.1.3.16 - phosphatase, ec:3.1.3.16 - phosphatase, ec:3.1.3.16 - phosphatase
TRINITY_DN280_c0_g2_i1	Drug metabolism - other enzymes, Fatty acid elongation	map00983, map00062	20, 12	ec:2.7.1.48 - kinase, ec:3.5.2.2 - hydantoinase, ec:3.1.1.1 - ali-esterase, ec:1.17.4.1 - reductase, ec:2.4.2.10 - phosphoribosyltransferase, ec:3.2.1.31 - beta-glucuronide glucuronohydrolase glucuronidase, ec:3.6.1.23 - diphosphatase, ec:3.5.4.5 - deaminase, ec:6.3.5.2 - synthase (glutamine-hydrolysing), ec:2.3.1.5 - N-acetyltransferase, ec:2.4.1.17 - 1-naphthol glucuronyltransferase, ec:2.4.2.8…
TRINITY_DN9199_c6_g1_i1	Purine metabolism	map00230	54	ec:3.6.1.15 - phosphatase, ec:4.6.1.2 - cyclase, ec:3.1.4.35 - phosphodiesterase, ec:3.5.4.10 - cyclohydrolase, ec:3.1.5.1 - deoxy-GTPase, ec:3.6.1.9 - diphosphatase, ec:3.5.4.3 - deaminase, ec:3.6.1.17 - (asymmetrical), ec:1.17.4.1 - reductase, ec:3.6.1.3 - adenylpyrophosphatase, ec:3.1.4.17 - phosphodiesterase, ec:4.3.2.2 - lyase, ec:1.7.1.7 - reductase, ec:1.17.1.4 - dehydrogenase, ec:2.7.7.4 …
TRINITY_DN111530_c0_g1_i1	Propanoate metabolism, Valine, leucine and isoleucine degradation, beta-Alanine metabolism	map00640, map00280, map00410	21, 22, 12	ec:6.2.1.1 - ligase, ec:6.4.1.3 - carboxylase, ec:1.8.1.4 - dehydrogenase, ec:4.1.1.9 - decarboxylase, ec:6.2.1.17 - ligase, ec:2.8.3.1 - CoA-transferase, ec:1.2.4.4 - dehydrogenase (2-methylpropanoyl-transferring), ec:2.3.1.168 - (2-methylpropanoyl)transferase, ec:4.2.3.3 - synthase, ec:1.3.3.6 - oxidase, ec:6.2.1.5 - ligase (ADP-forming), ec:5.1.99.1 - epimerase, ec:3.1.2.4 - hydrolase, ec:1.2.…
TRINITY_DN196565_c0_g1_i1	Galactose metabolism, Amino sugar and nucleotide sugar metabolism	map00052, map00520	19, 35	ec:5.1.3.2 - 4-epimerase, ec:3.2.1.10 - limit dextrinase (erroneous), ec:3.2.1.26 - invertase, ec:2.7.7.64 - uridylyltransferase, ec:3.2.1.20 - maltase, ec:2.7.7.9 - uridylyltransferase, ec:1.1.1.21 - reductase, ec:2.7.1.2 - glucokinase (phosphorylating), ec:3.2.1.23 - lactase (ambiguous), ec:3.2.1.22 - melibiase, ec:5.4.2.2 - (alpha-D-glucose-1,6-bisphosphate-dependent), ec:2.7.1.11 - phosphohex…
TRINITY_DN465_c2_g2_i2	Glycerophospholipid metabolism	map00564	30	ec:3.1.4.4 - D, ec:2.7.7.15 - cytidylyltransferase, ec:2.3.1.51 - O-acyltransferase, ec:2.7.8.5 - 1-phosphatidyltransferase, ec:2.3.1.23 - O-acyltransferase, ec:2.3.1.42 - O-acyltransferase, ec:2.7.8.11 - 3-phosphatidyltransferase, ec:2.1.1.17 - N-methyltransferase, ec:1.1.1.8 - dehydrogenase (NAD+), ec:4.1.1.65 - decarboxylase, ec:2.7.8.1 - EPT, ec:2.7.7.41 - cytidylyltransferase, ec:2.7.1.107 -…
TRINITY_DN5299_c0_g3_i1	Other glycan degradation	map00511	9	ec:3.2.1.45 - psychosine hydrolase, ec:3.2.1.51 - alpha-fucosidase, ec:3.2.1.23 - lactase (ambiguous), ec:3.2.1.25 - mannanase, ec:3.5.1.26 - aspartylglucosylamine deaspartylase, ec:3.2.1.96 - endo-beta-N-acetylglucosaminidase, ec:3.2.1.18 - neuraminidase, ec:3.2.1.52 - hexosaminidase, ec:3.2.1.24 - alpha-D-mannosidase
TRINITY_DN1814_c0_g1_i10	Amino sugar and nucleotide sugar metabolism	map00520	35	ec:2.6.1.16 - transaminase (isomerizing), ec:5.1.3.2 - 4-epimerase, ec:5.1.3.14 - 2-epimerase (non-hydrolysing), ec:1.1.1.271 - synthase, ec:2.7.7.64 - uridylyltransferase, ec:4.1.3.3 - lyase, ec:2.7.7.9 - uridylyltransferase, ec:4.2.1.47 - 4,6-dehydratase, ec:2.7.1.7 - mannokinase (phosphorylating), ec:3.5.99.6 - deaminase, ec:2.7.1.2 - glucokinase (phosphorylating), ec:5.4.2.8 - mannose phospho…
TRINITY_DN9781_c0_g2_i1	Other glycan degradation	map00511	9	ec:3.2.1.45 - psychosine hydrolase, ec:3.2.1.51 - alpha-fucosidase, ec:3.2.1.23 - lactase (ambiguous), ec:3.2.1.25 - mannanase, ec:3.5.1.26 - aspartylglucosylamine deaspartylase, ec:3.2.1.96 - endo-beta-N-acetylglucosaminidase, ec:3.2.1.18 - neuraminidase, ec:3.2.1.52 - hexosaminidase, ec:3.2.1.24 - alpha-D-mannosidase
TRINITY_DN772_c0_g1_i2	Drug metabolism - other enzymes, Glycerolipid metabolism	map00983, map00561	20, 19	ec:2.7.1.48 - kinase, ec:3.5.2.2 - hydantoinase, ec:3.1.1.1 - ali-esterase, ec:1.17.4.1 - reductase, ec:2.4.2.10 - phosphoribosyltransferase, ec:3.2.1.31 - beta-glucuronide glucuronohydrolase glucuronidase, ec:3.6.1.23 - diphosphatase, ec:3.5.4.5 - deaminase, ec:6.3.5.2 - synthase (glutamine-hydrolysing), ec:2.3.1.5 - N-acetyltransferase, ec:2.4.1.17 - 1-naphthol glucuronyltransferase, ec:2.4.2.8…
TRINITY_DN772_c0_g1_i1	Drug metabolism - other enzymes, Glycerolipid metabolism	map00983, map00561	20, 19	ec:2.7.1.48 - kinase, ec:3.5.2.2 - hydantoinase, ec:3.1.1.1 - ali-esterase, ec:1.17.4.1 - reductase, ec:2.4.2.10 - phosphoribosyltransferase, ec:3.2.1.31 - beta-glucuronide glucuronohydrolase glucuronidase, ec:3.6.1.23 - diphosphatase, ec:3.5.4.5 - deaminase, ec:6.3.5.2 - synthase (glutamine-hydrolysing), ec:2.3.1.5 - N-acetyltransferase, ec:2.4.1.17 - 1-naphthol glucuronyltransferase, ec:2.4.2.8…
TRINITY_DN3569_c4_g1_i1	Pentose phosphate pathway	map00030	17	ec:5.1.3.1 - 3-epimerase, ec:2.7.1.12 - gluconokinase (phosphorylating), ec:5.4.2.2 - (alpha-D-glucose-1,6-bisphosphate-dependent), ec:2.7.1.11 - phosphohexokinase, ec:2.2.1.2 - dihydroxyacetonetransferase, ec:5.3.1.9 - isomerase, ec:4.1.2.4 - aldolase, ec:1.1.1.44 - dehydrogenase (NADP+-dependent, decarboxylating), ec:3.1.3.11 - hexose diphosphatase, ec:5.4.2.7 - phosphodeoxyribomutase, ec:5.3.1…
TRINITY_DN5958_c2_g1_i1	Nicotinate and nicotinamide metabolism	map00760	16	ec:6.3.4.21 - phosphoribosyltransferase, ec:2.7.7.1 - adenylyltransferase, ec:3.6.1.9 - diphosphatase, ec:2.7.1.23 - kinase, ec:1.6.1.2 - transhydrogenase (Re/Si-specific), ec:3.6.1.22 - diphosphatase, ec:3.1.3.5 - uridine 5'-nucleotidase, ec:1.2.1.24 - dehydrogenase (NAD+), ec:2.4.2.12 - phosphoribosyltransferase, ec:3.2.2.6 - cyclase/cyclic ADP-ribose hydrolase, ec:1.2.1.16 - dehydrogenase [NAD…
TRINITY_DN109519_c0_g1_i1	Steroid biosynthesis	map00100	9	ec:1.3.1.21 - reductase, ec:5.4.99.7 - synthase, ec:1.3.1.71 - reductase, ec:3.1.1.13 - esterase, ec:1.3.1.70 - reductase, ec:1.1.1.270 - 3-dehydrogenase, ec:1.14.14.17 - monooxygenase, ec:5.3.3.5 - Delta-isomerase, ec:2.5.1.21 - synthase
TRINITY_DN772_c0_g1_i9	Drug metabolism - other enzymes, Glycerolipid metabolism	map00983, map00561	20, 19	ec:2.7.1.48 - kinase, ec:3.5.2.2 - hydantoinase, ec:3.1.1.1 - ali-esterase, ec:1.17.4.1 - reductase, ec:2.4.2.10 - phosphoribosyltransferase, ec:3.2.1.31 - beta-glucuronide glucuronohydrolase glucuronidase, ec:3.6.1.23 - diphosphatase, ec:3.5.4.5 - deaminase, ec:6.3.5.2 - synthase (glutamine-hydrolysing), ec:2.3.1.5 - N-acetyltransferase, ec:2.4.1.17 - 1-naphthol glucuronyltransferase, ec:2.4.2.8…
TRINITY_DN109519_c0_g1_i3	Steroid biosynthesis	map00100	9	ec:1.3.1.21 - reductase, ec:5.4.99.7 - synthase, ec:1.3.1.71 - reductase, ec:3.1.1.13 - esterase, ec:1.3.1.70 - reductase, ec:1.1.1.270 - 3-dehydrogenase, ec:1.14.14.17 - monooxygenase, ec:5.3.3.5 - Delta-isomerase, ec:2.5.1.21 - synthase
TRINITY_DN109519_c0_g1_i2	Steroid biosynthesis	map00100	9	ec:1.3.1.21 - reductase, ec:5.4.99.7 - synthase, ec:1.3.1.71 - reductase, ec:3.1.1.13 - esterase, ec:1.3.1.70 - reductase, ec:1.1.1.270 - 3-dehydrogenase, ec:1.14.14.17 - monooxygenase, ec:5.3.3.5 - Delta-isomerase, ec:2.5.1.21 - synthase
TRINITY_DN772_c0_g1_i3	Drug metabolism - other enzymes, Glycerolipid metabolism	map00983, map00561	20, 19	ec:2.7.1.48 - kinase, ec:3.5.2.2 - hydantoinase, ec:3.1.1.1 - ali-esterase, ec:1.17.4.1 - reductase, ec:2.4.2.10 - phosphoribosyltransferase, ec:3.2.1.31 - beta-glucuronide glucuronohydrolase glucuronidase, ec:3.6.1.23 - diphosphatase, ec:3.5.4.5 - deaminase, ec:6.3.5.2 - synthase (glutamine-hydrolysing), ec:2.3.1.5 - N-acetyltransferase, ec:2.4.1.17 - 1-naphthol glucuronyltransferase, ec:2.4.2.8…
TRINITY_DN1491_c0_g2_i1	Purine metabolism, Thiamine metabolism	map00230, map00730	54, 7	ec:3.6.1.15 - phosphatase, ec:4.6.1.2 - cyclase, ec:3.1.4.35 - phosphodiesterase, ec:3.5.4.10 - cyclohydrolase, ec:3.1.5.1 - deoxy-GTPase, ec:3.6.1.9 - diphosphatase, ec:3.5.4.3 - deaminase, ec:3.6.1.17 - (asymmetrical), ec:1.17.4.1 - reductase, ec:3.6.1.3 - adenylpyrophosphatase, ec:3.1.4.17 - phosphodiesterase, ec:4.3.2.2 - lyase, ec:1.7.1.7 - reductase, ec:1.17.1.4 - dehydrogenase, ec:2.7.7.4 …
TRINITY_DN1491_c0_g2_i3	Purine metabolism, Thiamine metabolism	map00230, map00730	54, 7	ec:3.6.1.15 - phosphatase, ec:4.6.1.2 - cyclase, ec:3.1.4.35 - phosphodiesterase, ec:3.5.4.10 - cyclohydrolase, ec:3.1.5.1 - deoxy-GTPase, ec:3.6.1.9 - diphosphatase, ec:3.5.4.3 - deaminase, ec:3.6.1.17 - (asymmetrical), ec:1.17.4.1 - reductase, ec:3.6.1.3 - adenylpyrophosphatase, ec:3.1.4.17 - phosphodiesterase, ec:4.3.2.2 - lyase, ec:1.7.1.7 - reductase, ec:1.17.1.4 - dehydrogenase, ec:2.7.7.4 …
TRINITY_DN8621_c0_g4_i1	Folate biosynthesis, One carbon pool by folate	map00790, map00670	19, 15	ec:3.4.19.9 - gamma-glutamyl hydrolase, ec:1.14.16.4 - 5-monooxygenase, ec:1.1.1.184 - reductase (NADPH), ec:2.7.7.75 - adenylyltransferase, ec:1.1.1.21 - reductase, ec:4.2.3.12 - synthase, ec:1.14.16.1 - 4-monooxygenase, ec:2.10.1.1 - molybdotransferase, ec:4.2.1.96 - dehydratase, ec:2.8.1.12 - synthase, ec:1.5.1.34 - reductase, ec:1.1.1.153 - reductase (L-erythro-7,8-dihydrobiopterin forming), …
TRINITY_DN4152_c0_g1_i1	mTOR signaling pathway	map04150	3	ec:2.7.11.11 - protein kinase, ec:2.7.1.153 - 3-kinase, ec:2.7.11.24 - protein kinase
TRINITY_DN10046_c0_g1_i8	T cell receptor signaling pathway	map04660	2	ec:2.7.10.2 - protein-tyrosine kinase, ec:3.1.3.16 - phosphatase
TRINITY_DN16628_c0_g1_i1	Purine metabolism, Thiamine metabolism	map00230, map00730	54, 7	ec:3.6.1.15 - phosphatase, ec:4.6.1.2 - cyclase, ec:3.1.4.35 - phosphodiesterase, ec:3.5.4.10 - cyclohydrolase, ec:3.1.5.1 - deoxy-GTPase, ec:3.6.1.9 - diphosphatase, ec:3.5.4.3 - deaminase, ec:3.6.1.17 - (asymmetrical), ec:1.17.4.1 - reductase, ec:3.6.1.3 - adenylpyrophosphatase, ec:3.1.4.17 - phosphodiesterase, ec:4.3.2.2 - lyase, ec:1.7.1.7 - reductase, ec:1.17.1.4 - dehydrogenase, ec:2.7.7.4 …
TRINITY_DN142010_c0_g1_i1	Purine metabolism, Thiamine metabolism	map00230, map00730	54, 7	ec:3.6.1.15 - phosphatase, ec:4.6.1.2 - cyclase, ec:3.1.4.35 - phosphodiesterase, ec:3.5.4.10 - cyclohydrolase, ec:3.1.5.1 - deoxy-GTPase, ec:3.6.1.9 - diphosphatase, ec:3.5.4.3 - deaminase, ec:3.6.1.17 - (asymmetrical), ec:1.17.4.1 - reductase, ec:3.6.1.3 - adenylpyrophosphatase, ec:3.1.4.17 - phosphodiesterase, ec:4.3.2.2 - lyase, ec:1.7.1.7 - reductase, ec:1.17.1.4 - dehydrogenase, ec:2.7.7.4 …
TRINITY_DN213838_c0_g1_i1	Tryptophan metabolism	map00380	17	ec:3.5.1.4 - acylamidase, ec:1.2.1.3 - dehydrogenase (NAD+), ec:1.1.1.35 - dehydrogenase, ec:1.14.16.4 - 5-monooxygenase, ec:1.2.4.2 - dehydrogenase (succinyl-transferring), ec:2.3.1.61 - succinyltransferase, ec:1.8.1.4 - dehydrogenase, ec:4.1.1.45 - decarboxylase, ec:3.7.1.3 - ec:3.7.1.3 kynureninase, ec:1.13.11.6 - 3,4-dioxygenase, ec:1.14.13.9 - 3-monooxygenase, ec:2.6.1.7 - transaminase, ec:2…
TRINITY_DN150174_c0_g1_i1	Cysteine and methionine metabolism	map00270	28	ec:3.3.1.1 - S-adenosylhomocysteine synthase, ec:2.6.1.3 - transaminase, ec:6.3.2.3 - synthase, ec:1.1.1.37 - dehydrogenase, ec:4.2.1.109 - 1-phosphate dehydratase, ec:4.2.1.22 - beta-synthase, ec:2.5.1.22 - synthase, ec:5.3.2.5 - enolase, ec:4.1.1.50 - decarboxylase, ec:2.4.2.28 - phosphorylase, ec:2.1.1.13 - synthase, ec:2.1.1.5 - S-methyltransferase, ec:4.3.1.17 - ammonia-lyase, ec:2.6.1.1 - t…
TRINITY_DN3035_c0_g2_i11	Purine metabolism, Thiamine metabolism	map00230, map00730	54, 7	ec:3.6.1.15 - phosphatase, ec:4.6.1.2 - cyclase, ec:3.1.4.35 - phosphodiesterase, ec:3.5.4.10 - cyclohydrolase, ec:3.1.5.1 - deoxy-GTPase, ec:3.6.1.9 - diphosphatase, ec:3.5.4.3 - deaminase, ec:3.6.1.17 - (asymmetrical), ec:1.17.4.1 - reductase, ec:3.6.1.3 - adenylpyrophosphatase, ec:3.1.4.17 - phosphodiesterase, ec:4.3.2.2 - lyase, ec:1.7.1.7 - reductase, ec:1.17.1.4 - dehydrogenase, ec:2.7.7.4 …
TRINITY_DN15172_c0_g1_i1	Various types of N-glycan biosynthesis, N-Glycan biosynthesis	map00513, map00510	13, 20	ec:2.4.1.38 - beta-1,4-galactosyltransferase, ec:2.4.1.101 - 2-beta-N-acetylglucosaminyltransferase, ec:2.4.1.68 - 6-alpha-L-fucosyltransferase, ec:2.4.1.131 - alpha-1,2-mannosyltransferase, ec:2.4.1.258 - alpha-1,3-mannosyltransferase, ec:2.4.1.141 - N-acetylglucosaminyltransferase, ec:2.4.1.132 - alpha-1,3-mannosyltransferase, ec:2.4.1.143 - 2-beta-N-acetylglucosaminyltransferase, ec:3.2.1.52 -…
TRINITY_DN3035_c0_g2_i13	Purine metabolism, Thiamine metabolism	map00230, map00730	54, 7	ec:3.6.1.15 - phosphatase, ec:4.6.1.2 - cyclase, ec:3.1.4.35 - phosphodiesterase, ec:3.5.4.10 - cyclohydrolase, ec:3.1.5.1 - deoxy-GTPase, ec:3.6.1.9 - diphosphatase, ec:3.5.4.3 - deaminase, ec:3.6.1.17 - (asymmetrical), ec:1.17.4.1 - reductase, ec:3.6.1.3 - adenylpyrophosphatase, ec:3.1.4.17 - phosphodiesterase, ec:4.3.2.2 - lyase, ec:1.7.1.7 - reductase, ec:1.17.1.4 - dehydrogenase, ec:2.7.7.4 …
TRINITY_DN1459_c0_g1_i5	Purine metabolism, Thiamine metabolism	map00230, map00730	54, 7	ec:3.6.1.15 - phosphatase, ec:4.6.1.2 - cyclase, ec:3.1.4.35 - phosphodiesterase, ec:3.5.4.10 - cyclohydrolase, ec:3.1.5.1 - deoxy-GTPase, ec:3.6.1.9 - diphosphatase, ec:3.5.4.3 - deaminase, ec:3.6.1.17 - (asymmetrical), ec:1.17.4.1 - reductase, ec:3.6.1.3 - adenylpyrophosphatase, ec:3.1.4.17 - phosphodiesterase, ec:4.3.2.2 - lyase, ec:1.7.1.7 - reductase, ec:1.17.1.4 - dehydrogenase, ec:2.7.7.4 …
TRINITY_DN135870_c0_g1_i4	Purine metabolism, Thiamine metabolism	map00230, map00730	54, 7	ec:3.6.1.15 - phosphatase, ec:4.6.1.2 - cyclase, ec:3.1.4.35 - phosphodiesterase, ec:3.5.4.10 - cyclohydrolase, ec:3.1.5.1 - deoxy-GTPase, ec:3.6.1.9 - diphosphatase, ec:3.5.4.3 - deaminase, ec:3.6.1.17 - (asymmetrical), ec:1.17.4.1 - reductase, ec:3.6.1.3 - adenylpyrophosphatase, ec:3.1.4.17 - phosphodiesterase, ec:4.3.2.2 - lyase, ec:1.7.1.7 - reductase, ec:1.17.1.4 - dehydrogenase, ec:2.7.7.4 …
TRINITY_DN1459_c0_g1_i1	Purine metabolism, Thiamine metabolism	map00230, map00730	54, 7	ec:3.6.1.15 - phosphatase, ec:4.6.1.2 - cyclase, ec:3.1.4.35 - phosphodiesterase, ec:3.5.4.10 - cyclohydrolase, ec:3.1.5.1 - deoxy-GTPase, ec:3.6.1.9 - diphosphatase, ec:3.5.4.3 - deaminase, ec:3.6.1.17 - (asymmetrical), ec:1.17.4.1 - reductase, ec:3.6.1.3 - adenylpyrophosphatase, ec:3.1.4.17 - phosphodiesterase, ec:4.3.2.2 - lyase, ec:1.7.1.7 - reductase, ec:1.17.1.4 - dehydrogenase, ec:2.7.7.4 …
TRINITY_DN55975_c0_g1_i1	Glycerophospholipid metabolism, Phosphatidylinositol signaling system, Ether lipid metabolism, Inositol phosphate metabolism	map00564, map04070, map00565, map00562	30, 24, 13, 25	ec:3.1.4.4 - D, ec:2.7.7.15 - cytidylyltransferase, ec:2.3.1.51 - O-acyltransferase, ec:2.7.8.5 - 1-phosphatidyltransferase, ec:2.3.1.23 - O-acyltransferase, ec:2.3.1.42 - O-acyltransferase, ec:2.7.8.11 - 3-phosphatidyltransferase, ec:2.1.1.17 - N-methyltransferase, ec:1.1.1.8 - dehydrogenase (NAD+), ec:4.1.1.65 - decarboxylase, ec:2.7.8.1 - EPT, ec:2.7.7.41 - cytidylyltransferase, ec:2.7.1.107 -…
TRINITY_DN754_c1_g1_i11	Purine metabolism, Thiamine metabolism	map00230, map00730	54, 7	ec:3.6.1.15 - phosphatase, ec:4.6.1.2 - cyclase, ec:3.1.4.35 - phosphodiesterase, ec:3.5.4.10 - cyclohydrolase, ec:3.1.5.1 - deoxy-GTPase, ec:3.6.1.9 - diphosphatase, ec:3.5.4.3 - deaminase, ec:3.6.1.17 - (asymmetrical), ec:1.17.4.1 - reductase, ec:3.6.1.3 - adenylpyrophosphatase, ec:3.1.4.17 - phosphodiesterase, ec:4.3.2.2 - lyase, ec:1.7.1.7 - reductase, ec:1.17.1.4 - dehydrogenase, ec:2.7.7.4 …
TRINITY_DN135870_c0_g1_i2	Purine metabolism, Thiamine metabolism	map00230, map00730	54, 7	ec:3.6.1.15 - phosphatase, ec:4.6.1.2 - cyclase, ec:3.1.4.35 - phosphodiesterase, ec:3.5.4.10 - cyclohydrolase, ec:3.1.5.1 - deoxy-GTPase, ec:3.6.1.9 - diphosphatase, ec:3.5.4.3 - deaminase, ec:3.6.1.17 - (asymmetrical), ec:1.17.4.1 - reductase, ec:3.6.1.3 - adenylpyrophosphatase, ec:3.1.4.17 - phosphodiesterase, ec:4.3.2.2 - lyase, ec:1.7.1.7 - reductase, ec:1.17.1.4 - dehydrogenase, ec:2.7.7.4 …
TRINITY_DN2941_c0_g1_i18	Pyrimidine metabolism, Nicotinate and nicotinamide metabolism, Purine metabolism, Riboflavin metabolism, Pantothenate and CoA biosynthesis, Starch and sucrose metabolism	map00240, map00760, map00230, map00740, map00770, map00500	29, 16, 54, 7, 10, 21	ec:2.7.1.48 - kinase, ec:3.5.2.2 - hydantoinase, ec:1.3.5.2 - dehydrogenase (quinone), ec:3.6.1.9 - diphosphatase, ec:6.3.4.2 - synthase (glutamine hydrolysing), ec:2.1.1.45 - synthase, ec:3.6.1.17 - (asymmetrical), ec:1.17.4.1 - reductase, ec:2.1.3.2 - carbamoyltransferase, ec:2.4.2.10 - phosphoribosyltransferase, ec:3.6.1.12 - diphosphatase, ec:3.5.4.12 - deaminase, ec:3.6.1.23 - diphosphatase,…
TRINITY_DN62654_c1_g3_i1	T cell receptor signaling pathway	map04660	2	ec:2.7.10.2 - protein-tyrosine kinase, ec:3.1.3.16 - phosphatase
TRINITY_DN6762_c0_g1_i1	N-Glycan biosynthesis	map00510	20	ec:2.4.1.38 - beta-1,4-galactosyltransferase, ec:2.4.1.101 - 2-beta-N-acetylglucosaminyltransferase, ec:2.4.1.68 - 6-alpha-L-fucosyltransferase, ec:2.4.1.131 - alpha-1,2-mannosyltransferase, ec:2.4.1.256 - alpha-1,2-glucosyltransferase, ec:2.4.1.144 - 4-beta-N-acetylglucosaminyltransferase, ec:2.4.1.155 - 6-beta-N-acetylglucosaminyltransferase, ec:2.4.1.258 - alpha-1,3-mannosyltransferase, ec:3.2…
TRINITY_DN17706_c0_g1_i7	Mucin type O-glycan biosynthesis	map00512	4	ec:2.4.99.4 - alpha-2,3-sialyltransferase, ec:2.4.1.122 - beta-1,3-galactosyltransferase, ec:2.4.99.3 - alpha-2,6-sialyltransferase, ec:2.4.1.41 - N-acetylgalactosaminyltransferase
TRINITY_DN7046_c0_g1_i1	T cell receptor signaling pathway, PD-L1 expression and PD-1 checkpoint pathway in cancer, Th1 and Th2 cell differentiation	map04660, map05235, map04658	2, 1, 1	ec:2.7.10.2 - protein-tyrosine kinase, ec:3.1.3.16 - phosphatase, ec:3.1.3.16 - phosphatase, ec:3.1.3.16 - phosphatase
TRINITY_DN3078_c2_g1_i4	Steroid biosynthesis, Drug metabolism - other enzymes, Glycerolipid metabolism	map00100, map00983, map00561	9, 20, 19	ec:1.3.1.21 - reductase, ec:5.4.99.7 - synthase, ec:1.3.1.71 - reductase, ec:3.1.1.13 - esterase, ec:1.3.1.70 - reductase, ec:1.1.1.270 - 3-dehydrogenase, ec:1.14.14.17 - monooxygenase, ec:5.3.3.5 - Delta-isomerase, ec:2.5.1.21 - synthase, ec:2.7.1.48 - kinase, ec:3.5.2.2 - hydantoinase, ec:3.1.1.1 - ali-esterase, ec:1.17.4.1 - reductase, ec:2.4.2.10 - phosphoribosyltransferase, ec:3.2.1.31 - bet…
TRINITY_DN71881_c0_g1_i1	Purine metabolism, Thiamine metabolism	map00230, map00730	54, 7	ec:3.6.1.15 - phosphatase, ec:4.6.1.2 - cyclase, ec:3.1.4.35 - phosphodiesterase, ec:3.5.4.10 - cyclohydrolase, ec:3.1.5.1 - deoxy-GTPase, ec:3.6.1.9 - diphosphatase, ec:3.5.4.3 - deaminase, ec:3.6.1.17 - (asymmetrical), ec:1.17.4.1 - reductase, ec:3.6.1.3 - adenylpyrophosphatase, ec:3.1.4.17 - phosphodiesterase, ec:4.3.2.2 - lyase, ec:1.7.1.7 - reductase, ec:1.17.1.4 - dehydrogenase, ec:2.7.7.4 …
TRINITY_DN71881_c0_g1_i2	Purine metabolism, Thiamine metabolism	map00230, map00730	54, 7	ec:3.6.1.15 - phosphatase, ec:4.6.1.2 - cyclase, ec:3.1.4.35 - phosphodiesterase, ec:3.5.4.10 - cyclohydrolase, ec:3.1.5.1 - deoxy-GTPase, ec:3.6.1.9 - diphosphatase, ec:3.5.4.3 - deaminase, ec:3.6.1.17 - (asymmetrical), ec:1.17.4.1 - reductase, ec:3.6.1.3 - adenylpyrophosphatase, ec:3.1.4.17 - phosphodiesterase, ec:4.3.2.2 - lyase, ec:1.7.1.7 - reductase, ec:1.17.1.4 - dehydrogenase, ec:2.7.7.4 …
TRINITY_DN37262_c0_g1_i5	Drug metabolism - other enzymes, Aminoacyl-tRNA biosynthesis	map00983, map00970	20, 22	ec:2.7.1.48 - kinase, ec:3.5.2.2 - hydantoinase, ec:3.1.1.1 - ali-esterase, ec:1.17.4.1 - reductase, ec:2.4.2.10 - phosphoribosyltransferase, ec:3.2.1.31 - beta-glucuronide glucuronohydrolase glucuronidase, ec:3.6.1.23 - diphosphatase, ec:3.5.4.5 - deaminase, ec:6.3.5.2 - synthase (glutamine-hydrolysing), ec:2.3.1.5 - N-acetyltransferase, ec:2.4.1.17 - 1-naphthol glucuronyltransferase, ec:2.4.2.8…
TRINITY_DN9202_c0_g1_i5	Purine metabolism	map00230	54	ec:3.6.1.15 - phosphatase, ec:4.6.1.2 - cyclase, ec:3.1.4.35 - phosphodiesterase, ec:3.5.4.10 - cyclohydrolase, ec:3.1.5.1 - deoxy-GTPase, ec:3.6.1.9 - diphosphatase, ec:3.5.4.3 - deaminase, ec:3.6.1.17 - (asymmetrical), ec:1.17.4.1 - reductase, ec:3.6.1.3 - adenylpyrophosphatase, ec:3.1.4.17 - phosphodiesterase, ec:4.3.2.2 - lyase, ec:1.7.1.7 - reductase, ec:1.17.1.4 - dehydrogenase, ec:2.7.7.4 …
TRINITY_DN9202_c0_g1_i7	Purine metabolism	map00230	54	ec:3.6.1.15 - phosphatase, ec:4.6.1.2 - cyclase, ec:3.1.4.35 - phosphodiesterase, ec:3.5.4.10 - cyclohydrolase, ec:3.1.5.1 - deoxy-GTPase, ec:3.6.1.9 - diphosphatase, ec:3.5.4.3 - deaminase, ec:3.6.1.17 - (asymmetrical), ec:1.17.4.1 - reductase, ec:3.6.1.3 - adenylpyrophosphatase, ec:3.1.4.17 - phosphodiesterase, ec:4.3.2.2 - lyase, ec:1.7.1.7 - reductase, ec:1.17.1.4 - dehydrogenase, ec:2.7.7.4 …
TRINITY_DN9202_c0_g1_i1	Purine metabolism	map00230	54	ec:3.6.1.15 - phosphatase, ec:4.6.1.2 - cyclase, ec:3.1.4.35 - phosphodiesterase, ec:3.5.4.10 - cyclohydrolase, ec:3.1.5.1 - deoxy-GTPase, ec:3.6.1.9 - diphosphatase, ec:3.5.4.3 - deaminase, ec:3.6.1.17 - (asymmetrical), ec:1.17.4.1 - reductase, ec:3.6.1.3 - adenylpyrophosphatase, ec:3.1.4.17 - phosphodiesterase, ec:4.3.2.2 - lyase, ec:1.7.1.7 - reductase, ec:1.17.1.4 - dehydrogenase, ec:2.7.7.4 …
TRINITY_DN1597_c0_g1_i10	Purine metabolism, Alanine, aspartate and glutamate metabolism	map00230, map00250	54, 23	ec:3.6.1.15 - phosphatase, ec:4.6.1.2 - cyclase, ec:3.1.4.35 - phosphodiesterase, ec:3.5.4.10 - cyclohydrolase, ec:3.1.5.1 - deoxy-GTPase, ec:3.6.1.9 - diphosphatase, ec:3.5.4.3 - deaminase, ec:3.6.1.17 - (asymmetrical), ec:1.17.4.1 - reductase, ec:3.6.1.3 - adenylpyrophosphatase, ec:3.1.4.17 - phosphodiesterase, ec:4.3.2.2 - lyase, ec:1.7.1.7 - reductase, ec:1.17.1.4 - dehydrogenase, ec:2.7.7.4 …
TRINITY_DN1597_c0_g1_i11	Purine metabolism, Alanine, aspartate and glutamate metabolism	map00230, map00250	54, 23	ec:3.6.1.15 - phosphatase, ec:4.6.1.2 - cyclase, ec:3.1.4.35 - phosphodiesterase, ec:3.5.4.10 - cyclohydrolase, ec:3.1.5.1 - deoxy-GTPase, ec:3.6.1.9 - diphosphatase, ec:3.5.4.3 - deaminase, ec:3.6.1.17 - (asymmetrical), ec:1.17.4.1 - reductase, ec:3.6.1.3 - adenylpyrophosphatase, ec:3.1.4.17 - phosphodiesterase, ec:4.3.2.2 - lyase, ec:1.7.1.7 - reductase, ec:1.17.1.4 - dehydrogenase, ec:2.7.7.4 …
TRINITY_DN278126_c0_g1_i1	Oxidative phosphorylation	map00190	5	ec:3.6.1.1 - diphosphatase, ec:1.3.5.1 - dehydrogenase, ec:7.1.2.1 - H+-exporting transporter, ec:1.6.99.3 - dehydrogenase, ec:7.1.1.2 - reductase (H+-translocating)
TRINITY_DN9202_c0_g1_i3	Purine metabolism	map00230	54	ec:3.6.1.15 - phosphatase, ec:4.6.1.2 - cyclase, ec:3.1.4.35 - phosphodiesterase, ec:3.5.4.10 - cyclohydrolase, ec:3.1.5.1 - deoxy-GTPase, ec:3.6.1.9 - diphosphatase, ec:3.5.4.3 - deaminase, ec:3.6.1.17 - (asymmetrical), ec:1.17.4.1 - reductase, ec:3.6.1.3 - adenylpyrophosphatase, ec:3.1.4.17 - phosphodiesterase, ec:4.3.2.2 - lyase, ec:1.7.1.7 - reductase, ec:1.17.1.4 - dehydrogenase, ec:2.7.7.4 …
TRINITY_DN731_c0_g2_i2	Purine metabolism, Thiamine metabolism	map00230, map00730	54, 7	ec:3.6.1.15 - phosphatase, ec:4.6.1.2 - cyclase, ec:3.1.4.35 - phosphodiesterase, ec:3.5.4.10 - cyclohydrolase, ec:3.1.5.1 - deoxy-GTPase, ec:3.6.1.9 - diphosphatase, ec:3.5.4.3 - deaminase, ec:3.6.1.17 - (asymmetrical), ec:1.17.4.1 - reductase, ec:3.6.1.3 - adenylpyrophosphatase, ec:3.1.4.17 - phosphodiesterase, ec:4.3.2.2 - lyase, ec:1.7.1.7 - reductase, ec:1.17.1.4 - dehydrogenase, ec:2.7.7.4 …
TRINITY_DN1597_c0_g1_i14	Purine metabolism, Alanine, aspartate and glutamate metabolism	map00230, map00250	54, 23	ec:3.6.1.15 - phosphatase, ec:4.6.1.2 - cyclase, ec:3.1.4.35 - phosphodiesterase, ec:3.5.4.10 - cyclohydrolase, ec:3.1.5.1 - deoxy-GTPase, ec:3.6.1.9 - diphosphatase, ec:3.5.4.3 - deaminase, ec:3.6.1.17 - (asymmetrical), ec:1.17.4.1 - reductase, ec:3.6.1.3 - adenylpyrophosphatase, ec:3.1.4.17 - phosphodiesterase, ec:4.3.2.2 - lyase, ec:1.7.1.7 - reductase, ec:1.17.1.4 - dehydrogenase, ec:2.7.7.4 …
TRINITY_DN1597_c0_g1_i15	Purine metabolism, Alanine, aspartate and glutamate metabolism	map00230, map00250	54, 23	ec:3.6.1.15 - phosphatase, ec:4.6.1.2 - cyclase, ec:3.1.4.35 - phosphodiesterase, ec:3.5.4.10 - cyclohydrolase, ec:3.1.5.1 - deoxy-GTPase, ec:3.6.1.9 - diphosphatase, ec:3.5.4.3 - deaminase, ec:3.6.1.17 - (asymmetrical), ec:1.17.4.1 - reductase, ec:3.6.1.3 - adenylpyrophosphatase, ec:3.1.4.17 - phosphodiesterase, ec:4.3.2.2 - lyase, ec:1.7.1.7 - reductase, ec:1.17.1.4 - dehydrogenase, ec:2.7.7.4 …
TRINITY_DN1597_c0_g1_i12	Purine metabolism, Alanine, aspartate and glutamate metabolism	map00230, map00250	54, 23	ec:3.6.1.15 - phosphatase, ec:4.6.1.2 - cyclase, ec:3.1.4.35 - phosphodiesterase, ec:3.5.4.10 - cyclohydrolase, ec:3.1.5.1 - deoxy-GTPase, ec:3.6.1.9 - diphosphatase, ec:3.5.4.3 - deaminase, ec:3.6.1.17 - (asymmetrical), ec:1.17.4.1 - reductase, ec:3.6.1.3 - adenylpyrophosphatase, ec:3.1.4.17 - phosphodiesterase, ec:4.3.2.2 - lyase, ec:1.7.1.7 - reductase, ec:1.17.1.4 - dehydrogenase, ec:2.7.7.4 …
TRINITY_DN1597_c0_g1_i13	Purine metabolism, Alanine, aspartate and glutamate metabolism	map00230, map00250	54, 23	ec:3.6.1.15 - phosphatase, ec:4.6.1.2 - cyclase, ec:3.1.4.35 - phosphodiesterase, ec:3.5.4.10 - cyclohydrolase, ec:3.1.5.1 - deoxy-GTPase, ec:3.6.1.9 - diphosphatase, ec:3.5.4.3 - deaminase, ec:3.6.1.17 - (asymmetrical), ec:1.17.4.1 - reductase, ec:3.6.1.3 - adenylpyrophosphatase, ec:3.1.4.17 - phosphodiesterase, ec:4.3.2.2 - lyase, ec:1.7.1.7 - reductase, ec:1.17.1.4 - dehydrogenase, ec:2.7.7.4 …
TRINITY_DN9202_c0_g1_i9	Purine metabolism	map00230	54	ec:3.6.1.15 - phosphatase, ec:4.6.1.2 - cyclase, ec:3.1.4.35 - phosphodiesterase, ec:3.5.4.10 - cyclohydrolase, ec:3.1.5.1 - deoxy-GTPase, ec:3.6.1.9 - diphosphatase, ec:3.5.4.3 - deaminase, ec:3.6.1.17 - (asymmetrical), ec:1.17.4.1 - reductase, ec:3.6.1.3 - adenylpyrophosphatase, ec:3.1.4.17 - phosphodiesterase, ec:4.3.2.2 - lyase, ec:1.7.1.7 - reductase, ec:1.17.1.4 - dehydrogenase, ec:2.7.7.4 …
TRINITY_DN9202_c0_g1_i8	Purine metabolism	map00230	54	ec:3.6.1.15 - phosphatase, ec:4.6.1.2 - cyclase, ec:3.1.4.35 - phosphodiesterase, ec:3.5.4.10 - cyclohydrolase, ec:3.1.5.1 - deoxy-GTPase, ec:3.6.1.9 - diphosphatase, ec:3.5.4.3 - deaminase, ec:3.6.1.17 - (asymmetrical), ec:1.17.4.1 - reductase, ec:3.6.1.3 - adenylpyrophosphatase, ec:3.1.4.17 - phosphodiesterase, ec:4.3.2.2 - lyase, ec:1.7.1.7 - reductase, ec:1.17.1.4 - dehydrogenase, ec:2.7.7.4 …
TRINITY_DN1597_c0_g1_i16	Purine metabolism, Alanine, aspartate and glutamate metabolism	map00230, map00250	54, 23	ec:3.6.1.15 - phosphatase, ec:4.6.1.2 - cyclase, ec:3.1.4.35 - phosphodiesterase, ec:3.5.4.10 - cyclohydrolase, ec:3.1.5.1 - deoxy-GTPase, ec:3.6.1.9 - diphosphatase, ec:3.5.4.3 - deaminase, ec:3.6.1.17 - (asymmetrical), ec:1.17.4.1 - reductase, ec:3.6.1.3 - adenylpyrophosphatase, ec:3.1.4.17 - phosphodiesterase, ec:4.3.2.2 - lyase, ec:1.7.1.7 - reductase, ec:1.17.1.4 - dehydrogenase, ec:2.7.7.4 …
TRINITY_DN17963_c1_g1_i1	Thiamine metabolism	map00730	7	ec:3.6.1.15 - phosphatase, ec:3.1.3.2 - phosphatase, ec:3.6.1.28 - ec:3.6.1.28 thiamine-triphosphatase, ec:2.8.1.7 - desulfurase, ec:2.7.6.2 - diphosphokinase, ec:2.7.4.3 - kinase, ec:3.1.3.1 - phosphatase
TRINITY_DN1983_c0_g1_i9	Purine metabolism, Thiamine metabolism	map00230, map00730	54, 7	ec:3.6.1.15 - phosphatase, ec:4.6.1.2 - cyclase, ec:3.1.4.35 - phosphodiesterase, ec:3.5.4.10 - cyclohydrolase, ec:3.1.5.1 - deoxy-GTPase, ec:3.6.1.9 - diphosphatase, ec:3.5.4.3 - deaminase, ec:3.6.1.17 - (asymmetrical), ec:1.17.4.1 - reductase, ec:3.6.1.3 - adenylpyrophosphatase, ec:3.1.4.17 - phosphodiesterase, ec:4.3.2.2 - lyase, ec:1.7.1.7 - reductase, ec:1.17.1.4 - dehydrogenase, ec:2.7.7.4 …
TRINITY_DN1983_c0_g1_i8	Purine metabolism, Thiamine metabolism	map00230, map00730	54, 7	ec:3.6.1.15 - phosphatase, ec:4.6.1.2 - cyclase, ec:3.1.4.35 - phosphodiesterase, ec:3.5.4.10 - cyclohydrolase, ec:3.1.5.1 - deoxy-GTPase, ec:3.6.1.9 - diphosphatase, ec:3.5.4.3 - deaminase, ec:3.6.1.17 - (asymmetrical), ec:1.17.4.1 - reductase, ec:3.6.1.3 - adenylpyrophosphatase, ec:3.1.4.17 - phosphodiesterase, ec:4.3.2.2 - lyase, ec:1.7.1.7 - reductase, ec:1.17.1.4 - dehydrogenase, ec:2.7.7.4 …
TRINITY_DN9386_c0_g1_i3	Purine metabolism, Thiamine metabolism	map00230, map00730	54, 7	ec:3.6.1.15 - phosphatase, ec:4.6.1.2 - cyclase, ec:3.1.4.35 - phosphodiesterase, ec:3.5.4.10 - cyclohydrolase, ec:3.1.5.1 - deoxy-GTPase, ec:3.6.1.9 - diphosphatase, ec:3.5.4.3 - deaminase, ec:3.6.1.17 - (asymmetrical), ec:1.17.4.1 - reductase, ec:3.6.1.3 - adenylpyrophosphatase, ec:3.1.4.17 - phosphodiesterase, ec:4.3.2.2 - lyase, ec:1.7.1.7 - reductase, ec:1.17.1.4 - dehydrogenase, ec:2.7.7.4 …
TRINITY_DN21947_c0_g2_i1	alpha-Linolenic acid metabolism, Drug metabolism - other enzymes, Linoleic acid metabolism, Glycerophospholipid metabolism, Arachidonic acid metabolism, Ether lipid metabolism	map00592, map00983, map00591, map00564, map00590, map00565	6, 20, 1, 30, 11, 13	ec:1.3.3.6 - oxidase, ec:2.3.1.16 - C-acyltransferase, ec:3.1.1.32 - A1, ec:1.1.1.1 - dehydrogenase, ec:4.2.1.17 - hydratase, ec:3.1.1.4 - A2, ec:2.7.1.48 - kinase, ec:3.5.2.2 - hydantoinase, ec:3.1.1.1 - ali-esterase, ec:1.17.4.1 - reductase, ec:2.4.2.10 - phosphoribosyltransferase, ec:3.2.1.31 - beta-glucuronide glucuronohydrolase glucuronidase, ec:3.6.1.23 - diphosphatase, ec:3.5.4.5 - deamina…
TRINITY_DN19992_c1_g2_i1	Glycolysis / Gluconeogenesis, Carbon fixation in photosynthetic organisms	map00010, map00710	27, 15	ec:4.1.1.32 - carboxykinase (GTP), ec:1.2.1.3 - dehydrogenase (NAD+), ec:2.3.1.12 - acetyltransferase, ec:6.2.1.1 - ligase, ec:2.7.2.3 - kinase, ec:1.8.1.4 - dehydrogenase, ec:1.2.1.5 - dehydrogenase [NAD(P)+], ec:4.2.1.11 - hydratase, ec:2.7.1.2 - glucokinase (phosphorylating), ec:1.1.1.2 - dehydrogenase (NADP+), ec:5.4.2.2 - (alpha-D-glucose-1,6-bisphosphate-dependent), ec:5.3.1.1 - isomerase, …
TRINITY_DN9386_c0_g1_i2	Purine metabolism, Thiamine metabolism	map00230, map00730	54, 7	ec:3.6.1.15 - phosphatase, ec:4.6.1.2 - cyclase, ec:3.1.4.35 - phosphodiesterase, ec:3.5.4.10 - cyclohydrolase, ec:3.1.5.1 - deoxy-GTPase, ec:3.6.1.9 - diphosphatase, ec:3.5.4.3 - deaminase, ec:3.6.1.17 - (asymmetrical), ec:1.17.4.1 - reductase, ec:3.6.1.3 - adenylpyrophosphatase, ec:3.1.4.17 - phosphodiesterase, ec:4.3.2.2 - lyase, ec:1.7.1.7 - reductase, ec:1.17.1.4 - dehydrogenase, ec:2.7.7.4 …
TRINITY_DN2409_c0_g1_i10	Aminoacyl-tRNA biosynthesis	map00970	22	ec:6.1.1.22 - ligase, ec:6.1.1.19 - ligase, ec:2.1.2.9 - formyltransferase, ec:6.1.1.9 - ligase, ec:6.1.1.3 - ligase, ec:6.1.1.15 - ligase, ec:6.1.1.5 - ligase, ec:6.1.1.10 - ligase, ec:6.1.1.21 - ligase, ec:6.1.1.18 - ligase, ec:6.1.1.7 - ligase, ec:6.1.1.12 - ligase, ec:6.1.1.2 - ligase, ec:6.3.5.7 - synthase (glutamine-hydrolysing), ec:6.1.1.14 - ligase, ec:6.1.1.4 - ligase, ec:6.1.1.20 - liga…
TRINITY_DN1983_c0_g1_i7	Purine metabolism, Thiamine metabolism	map00230, map00730	54, 7	ec:3.6.1.15 - phosphatase, ec:4.6.1.2 - cyclase, ec:3.1.4.35 - phosphodiesterase, ec:3.5.4.10 - cyclohydrolase, ec:3.1.5.1 - deoxy-GTPase, ec:3.6.1.9 - diphosphatase, ec:3.5.4.3 - deaminase, ec:3.6.1.17 - (asymmetrical), ec:1.17.4.1 - reductase, ec:3.6.1.3 - adenylpyrophosphatase, ec:3.1.4.17 - phosphodiesterase, ec:4.3.2.2 - lyase, ec:1.7.1.7 - reductase, ec:1.17.1.4 - dehydrogenase, ec:2.7.7.4 …
TRINITY_DN1983_c0_g1_i6	Purine metabolism, Thiamine metabolism	map00230, map00730	54, 7	ec:3.6.1.15 - phosphatase, ec:4.6.1.2 - cyclase, ec:3.1.4.35 - phosphodiesterase, ec:3.5.4.10 - cyclohydrolase, ec:3.1.5.1 - deoxy-GTPase, ec:3.6.1.9 - diphosphatase, ec:3.5.4.3 - deaminase, ec:3.6.1.17 - (asymmetrical), ec:1.17.4.1 - reductase, ec:3.6.1.3 - adenylpyrophosphatase, ec:3.1.4.17 - phosphodiesterase, ec:4.3.2.2 - lyase, ec:1.7.1.7 - reductase, ec:1.17.1.4 - dehydrogenase, ec:2.7.7.4 …
TRINITY_DN1983_c0_g1_i5	Purine metabolism, Thiamine metabolism	map00230, map00730	54, 7	ec:3.6.1.15 - phosphatase, ec:4.6.1.2 - cyclase, ec:3.1.4.35 - phosphodiesterase, ec:3.5.4.10 - cyclohydrolase, ec:3.1.5.1 - deoxy-GTPase, ec:3.6.1.9 - diphosphatase, ec:3.5.4.3 - deaminase, ec:3.6.1.17 - (asymmetrical), ec:1.17.4.1 - reductase, ec:3.6.1.3 - adenylpyrophosphatase, ec:3.1.4.17 - phosphodiesterase, ec:4.3.2.2 - lyase, ec:1.7.1.7 - reductase, ec:1.17.1.4 - dehydrogenase, ec:2.7.7.4 …
TRINITY_DN1983_c0_g1_i4	Purine metabolism, Thiamine metabolism	map00230, map00730	54, 7	ec:3.6.1.15 - phosphatase, ec:4.6.1.2 - cyclase, ec:3.1.4.35 - phosphodiesterase, ec:3.5.4.10 - cyclohydrolase, ec:3.1.5.1 - deoxy-GTPase, ec:3.6.1.9 - diphosphatase, ec:3.5.4.3 - deaminase, ec:3.6.1.17 - (asymmetrical), ec:1.17.4.1 - reductase, ec:3.6.1.3 - adenylpyrophosphatase, ec:3.1.4.17 - phosphodiesterase, ec:4.3.2.2 - lyase, ec:1.7.1.7 - reductase, ec:1.17.1.4 - dehydrogenase, ec:2.7.7.4 …
TRINITY_DN1983_c0_g1_i2	Purine metabolism, Thiamine metabolism	map00230, map00730	54, 7	ec:3.6.1.15 - phosphatase, ec:4.6.1.2 - cyclase, ec:3.1.4.35 - phosphodiesterase, ec:3.5.4.10 - cyclohydrolase, ec:3.1.5.1 - deoxy-GTPase, ec:3.6.1.9 - diphosphatase, ec:3.5.4.3 - deaminase, ec:3.6.1.17 - (asymmetrical), ec:1.17.4.1 - reductase, ec:3.6.1.3 - adenylpyrophosphatase, ec:3.1.4.17 - phosphodiesterase, ec:4.3.2.2 - lyase, ec:1.7.1.7 - reductase, ec:1.17.1.4 - dehydrogenase, ec:2.7.7.4 …
TRINITY_DN1983_c0_g1_i1	Purine metabolism, Thiamine metabolism	map00230, map00730	54, 7	ec:3.6.1.15 - phosphatase, ec:4.6.1.2 - cyclase, ec:3.1.4.35 - phosphodiesterase, ec:3.5.4.10 - cyclohydrolase, ec:3.1.5.1 - deoxy-GTPase, ec:3.6.1.9 - diphosphatase, ec:3.5.4.3 - deaminase, ec:3.6.1.17 - (asymmetrical), ec:1.17.4.1 - reductase, ec:3.6.1.3 - adenylpyrophosphatase, ec:3.1.4.17 - phosphodiesterase, ec:4.3.2.2 - lyase, ec:1.7.1.7 - reductase, ec:1.17.1.4 - dehydrogenase, ec:2.7.7.4 …
TRINITY_DN126091_c0_g1_i1	Aminoacyl-tRNA biosynthesis	map00970	22	ec:6.1.1.22 - ligase, ec:6.1.1.19 - ligase, ec:2.1.2.9 - formyltransferase, ec:6.1.1.9 - ligase, ec:6.1.1.3 - ligase, ec:6.1.1.15 - ligase, ec:6.1.1.5 - ligase, ec:6.1.1.10 - ligase, ec:6.1.1.21 - ligase, ec:6.1.1.18 - ligase, ec:6.1.1.7 - ligase, ec:6.1.1.12 - ligase, ec:6.1.1.2 - ligase, ec:6.3.5.7 - synthase (glutamine-hydrolysing), ec:6.1.1.14 - ligase, ec:6.1.1.4 - ligase, ec:6.1.1.20 - liga…
TRINITY_DN3562_c0_g1_i1	Pyruvate metabolism, Glycolysis / Gluconeogenesis, Citrate cycle (TCA cycle)	map00620, map00010, map00020	24, 27, 17	ec:4.1.1.32 - carboxykinase (GTP), ec:1.2.1.3 - dehydrogenase (NAD+), ec:1.1.1.79 - reductase (NADP+), ec:2.3.1.12 - acetyltransferase, ec:6.2.1.1 - ligase, ec:1.8.1.4 - dehydrogenase, ec:4.1.1.112 - decarboxylase, ec:1.1.1.40 - dehydrogenase (oxaloacetate-decarboxylating) (NADP+), ec:1.1.1.37 - dehydrogenase, ec:2.8.3.1 - CoA-transferase, ec:3.1.2.1 - hydrolase, ec:1.1.1.39 - dehydrogenase (deca…
TRINITY_DN3562_c0_g1_i2	Pyruvate metabolism, Glycolysis / Gluconeogenesis, Citrate cycle (TCA cycle)	map00620, map00010, map00020	24, 27, 17	ec:4.1.1.32 - carboxykinase (GTP), ec:1.2.1.3 - dehydrogenase (NAD+), ec:1.1.1.79 - reductase (NADP+), ec:2.3.1.12 - acetyltransferase, ec:6.2.1.1 - ligase, ec:1.8.1.4 - dehydrogenase, ec:4.1.1.112 - decarboxylase, ec:1.1.1.40 - dehydrogenase (oxaloacetate-decarboxylating) (NADP+), ec:1.1.1.37 - dehydrogenase, ec:2.8.3.1 - CoA-transferase, ec:3.1.2.1 - hydrolase, ec:1.1.1.39 - dehydrogenase (deca…
TRINITY_DN8151_c4_g1_i1	Purine metabolism, Thiamine metabolism	map00230, map00730	54, 7	ec:3.6.1.15 - phosphatase, ec:4.6.1.2 - cyclase, ec:3.1.4.35 - phosphodiesterase, ec:3.5.4.10 - cyclohydrolase, ec:3.1.5.1 - deoxy-GTPase, ec:3.6.1.9 - diphosphatase, ec:3.5.4.3 - deaminase, ec:3.6.1.17 - (asymmetrical), ec:1.17.4.1 - reductase, ec:3.6.1.3 - adenylpyrophosphatase, ec:3.1.4.17 - phosphodiesterase, ec:4.3.2.2 - lyase, ec:1.7.1.7 - reductase, ec:1.17.1.4 - dehydrogenase, ec:2.7.7.4 …
TRINITY_DN93973_c1_g1_i1	Purine metabolism, Thiamine metabolism	map00230, map00730	54, 7	ec:3.6.1.15 - phosphatase, ec:4.6.1.2 - cyclase, ec:3.1.4.35 - phosphodiesterase, ec:3.5.4.10 - cyclohydrolase, ec:3.1.5.1 - deoxy-GTPase, ec:3.6.1.9 - diphosphatase, ec:3.5.4.3 - deaminase, ec:3.6.1.17 - (asymmetrical), ec:1.17.4.1 - reductase, ec:3.6.1.3 - adenylpyrophosphatase, ec:3.1.4.17 - phosphodiesterase, ec:4.3.2.2 - lyase, ec:1.7.1.7 - reductase, ec:1.17.1.4 - dehydrogenase, ec:2.7.7.4 …
TRINITY_DN3562_c0_g1_i7	Pyruvate metabolism, Glycolysis / Gluconeogenesis, Citrate cycle (TCA cycle)	map00620, map00010, map00020	24, 27, 17	ec:4.1.1.32 - carboxykinase (GTP), ec:1.2.1.3 - dehydrogenase (NAD+), ec:1.1.1.79 - reductase (NADP+), ec:2.3.1.12 - acetyltransferase, ec:6.2.1.1 - ligase, ec:1.8.1.4 - dehydrogenase, ec:4.1.1.112 - decarboxylase, ec:1.1.1.40 - dehydrogenase (oxaloacetate-decarboxylating) (NADP+), ec:1.1.1.37 - dehydrogenase, ec:2.8.3.1 - CoA-transferase, ec:3.1.2.1 - hydrolase, ec:1.1.1.39 - dehydrogenase (deca…
TRINITY_DN69056_c0_g1_i1	Oxidative phosphorylation	map00190	5	ec:3.6.1.1 - diphosphatase, ec:1.3.5.1 - dehydrogenase, ec:7.1.2.1 - H+-exporting transporter, ec:1.6.99.3 - dehydrogenase, ec:7.1.1.2 - reductase (H+-translocating)
TRINITY_DN62_c1_g1_i1	Purine metabolism, Thiamine metabolism	map00230, map00730	54, 7	ec:3.6.1.15 - phosphatase, ec:4.6.1.2 - cyclase, ec:3.1.4.35 - phosphodiesterase, ec:3.5.4.10 - cyclohydrolase, ec:3.1.5.1 - deoxy-GTPase, ec:3.6.1.9 - diphosphatase, ec:3.5.4.3 - deaminase, ec:3.6.1.17 - (asymmetrical), ec:1.17.4.1 - reductase, ec:3.6.1.3 - adenylpyrophosphatase, ec:3.1.4.17 - phosphodiesterase, ec:4.3.2.2 - lyase, ec:1.7.1.7 - reductase, ec:1.17.1.4 - dehydrogenase, ec:2.7.7.4 …
TRINITY_DN3562_c0_g1_i3	Pyruvate metabolism, Glycolysis / Gluconeogenesis, Citrate cycle (TCA cycle)	map00620, map00010, map00020	24, 27, 17	ec:4.1.1.32 - carboxykinase (GTP), ec:1.2.1.3 - dehydrogenase (NAD+), ec:1.1.1.79 - reductase (NADP+), ec:2.3.1.12 - acetyltransferase, ec:6.2.1.1 - ligase, ec:1.8.1.4 - dehydrogenase, ec:4.1.1.112 - decarboxylase, ec:1.1.1.40 - dehydrogenase (oxaloacetate-decarboxylating) (NADP+), ec:1.1.1.37 - dehydrogenase, ec:2.8.3.1 - CoA-transferase, ec:3.1.2.1 - hydrolase, ec:1.1.1.39 - dehydrogenase (deca…
TRINITY_DN62_c1_g1_i5	Purine metabolism, Thiamine metabolism	map00230, map00730	54, 7	ec:3.6.1.15 - phosphatase, ec:4.6.1.2 - cyclase, ec:3.1.4.35 - phosphodiesterase, ec:3.5.4.10 - cyclohydrolase, ec:3.1.5.1 - deoxy-GTPase, ec:3.6.1.9 - diphosphatase, ec:3.5.4.3 - deaminase, ec:3.6.1.17 - (asymmetrical), ec:1.17.4.1 - reductase, ec:3.6.1.3 - adenylpyrophosphatase, ec:3.1.4.17 - phosphodiesterase, ec:4.3.2.2 - lyase, ec:1.7.1.7 - reductase, ec:1.17.1.4 - dehydrogenase, ec:2.7.7.4 …
TRINITY_DN62_c1_g1_i4	Purine metabolism, Thiamine metabolism	map00230, map00730	54, 7	ec:3.6.1.15 - phosphatase, ec:4.6.1.2 - cyclase, ec:3.1.4.35 - phosphodiesterase, ec:3.5.4.10 - cyclohydrolase, ec:3.1.5.1 - deoxy-GTPase, ec:3.6.1.9 - diphosphatase, ec:3.5.4.3 - deaminase, ec:3.6.1.17 - (asymmetrical), ec:1.17.4.1 - reductase, ec:3.6.1.3 - adenylpyrophosphatase, ec:3.1.4.17 - phosphodiesterase, ec:4.3.2.2 - lyase, ec:1.7.1.7 - reductase, ec:1.17.1.4 - dehydrogenase, ec:2.7.7.4 …
TRINITY_DN2807_c0_g1_i1	Cysteine and methionine metabolism	map00270	28	ec:3.3.1.1 - S-adenosylhomocysteine synthase, ec:2.6.1.3 - transaminase, ec:6.3.2.3 - synthase, ec:1.1.1.37 - dehydrogenase, ec:4.2.1.109 - 1-phosphate dehydratase, ec:4.2.1.22 - beta-synthase, ec:2.5.1.22 - synthase, ec:5.3.2.5 - enolase, ec:4.1.1.50 - decarboxylase, ec:2.4.2.28 - phosphorylase, ec:2.1.1.13 - synthase, ec:2.1.1.5 - S-methyltransferase, ec:4.3.1.17 - ammonia-lyase, ec:2.6.1.1 - t…
TRINITY_DN17927_c1_g1_i7	Purine metabolism	map00230	54	ec:3.6.1.15 - phosphatase, ec:4.6.1.2 - cyclase, ec:3.1.4.35 - phosphodiesterase, ec:3.5.4.10 - cyclohydrolase, ec:3.1.5.1 - deoxy-GTPase, ec:3.6.1.9 - diphosphatase, ec:3.5.4.3 - deaminase, ec:3.6.1.17 - (asymmetrical), ec:1.17.4.1 - reductase, ec:3.6.1.3 - adenylpyrophosphatase, ec:3.1.4.17 - phosphodiesterase, ec:4.3.2.2 - lyase, ec:1.7.1.7 - reductase, ec:1.17.1.4 - dehydrogenase, ec:2.7.7.4 …
TRINITY_DN17927_c1_g1_i6	Purine metabolism	map00230	54	ec:3.6.1.15 - phosphatase, ec:4.6.1.2 - cyclase, ec:3.1.4.35 - phosphodiesterase, ec:3.5.4.10 - cyclohydrolase, ec:3.1.5.1 - deoxy-GTPase, ec:3.6.1.9 - diphosphatase, ec:3.5.4.3 - deaminase, ec:3.6.1.17 - (asymmetrical), ec:1.17.4.1 - reductase, ec:3.6.1.3 - adenylpyrophosphatase, ec:3.1.4.17 - phosphodiesterase, ec:4.3.2.2 - lyase, ec:1.7.1.7 - reductase, ec:1.17.1.4 - dehydrogenase, ec:2.7.7.4 …
TRINITY_DN17927_c1_g1_i5	Purine metabolism	map00230	54	ec:3.6.1.15 - phosphatase, ec:4.6.1.2 - cyclase, ec:3.1.4.35 - phosphodiesterase, ec:3.5.4.10 - cyclohydrolase, ec:3.1.5.1 - deoxy-GTPase, ec:3.6.1.9 - diphosphatase, ec:3.5.4.3 - deaminase, ec:3.6.1.17 - (asymmetrical), ec:1.17.4.1 - reductase, ec:3.6.1.3 - adenylpyrophosphatase, ec:3.1.4.17 - phosphodiesterase, ec:4.3.2.2 - lyase, ec:1.7.1.7 - reductase, ec:1.17.1.4 - dehydrogenase, ec:2.7.7.4 …
TRINITY_DN17927_c1_g1_i4	Purine metabolism	map00230	54	ec:3.6.1.15 - phosphatase, ec:4.6.1.2 - cyclase, ec:3.1.4.35 - phosphodiesterase, ec:3.5.4.10 - cyclohydrolase, ec:3.1.5.1 - deoxy-GTPase, ec:3.6.1.9 - diphosphatase, ec:3.5.4.3 - deaminase, ec:3.6.1.17 - (asymmetrical), ec:1.17.4.1 - reductase, ec:3.6.1.3 - adenylpyrophosphatase, ec:3.1.4.17 - phosphodiesterase, ec:4.3.2.2 - lyase, ec:1.7.1.7 - reductase, ec:1.17.1.4 - dehydrogenase, ec:2.7.7.4 …
TRINITY_DN17927_c1_g1_i2	Purine metabolism	map00230	54	ec:3.6.1.15 - phosphatase, ec:4.6.1.2 - cyclase, ec:3.1.4.35 - phosphodiesterase, ec:3.5.4.10 - cyclohydrolase, ec:3.1.5.1 - deoxy-GTPase, ec:3.6.1.9 - diphosphatase, ec:3.5.4.3 - deaminase, ec:3.6.1.17 - (asymmetrical), ec:1.17.4.1 - reductase, ec:3.6.1.3 - adenylpyrophosphatase, ec:3.1.4.17 - phosphodiesterase, ec:4.3.2.2 - lyase, ec:1.7.1.7 - reductase, ec:1.17.1.4 - dehydrogenase, ec:2.7.7.4 …
TRINITY_DN17927_c1_g1_i1	Purine metabolism	map00230	54	ec:3.6.1.15 - phosphatase, ec:4.6.1.2 - cyclase, ec:3.1.4.35 - phosphodiesterase, ec:3.5.4.10 - cyclohydrolase, ec:3.1.5.1 - deoxy-GTPase, ec:3.6.1.9 - diphosphatase, ec:3.5.4.3 - deaminase, ec:3.6.1.17 - (asymmetrical), ec:1.17.4.1 - reductase, ec:3.6.1.3 - adenylpyrophosphatase, ec:3.1.4.17 - phosphodiesterase, ec:4.3.2.2 - lyase, ec:1.7.1.7 - reductase, ec:1.17.1.4 - dehydrogenase, ec:2.7.7.4 …
TRINITY_DN5425_c0_g1_i20	Pyrimidine metabolism, Drug metabolism - other enzymes	map00240, map00983	29, 20	ec:2.7.1.48 - kinase, ec:3.5.2.2 - hydantoinase, ec:1.3.5.2 - dehydrogenase (quinone), ec:3.6.1.9 - diphosphatase, ec:6.3.4.2 - synthase (glutamine hydrolysing), ec:2.1.1.45 - synthase, ec:3.6.1.17 - (asymmetrical), ec:1.17.4.1 - reductase, ec:2.1.3.2 - carbamoyltransferase, ec:2.4.2.10 - phosphoribosyltransferase, ec:3.6.1.12 - diphosphatase, ec:3.5.4.12 - deaminase, ec:3.6.1.23 - diphosphatase,…
TRINITY_DN3219_c1_g1_i2	Purine metabolism, Thiamine metabolism	map00230, map00730	54, 7	ec:3.6.1.15 - phosphatase, ec:4.6.1.2 - cyclase, ec:3.1.4.35 - phosphodiesterase, ec:3.5.4.10 - cyclohydrolase, ec:3.1.5.1 - deoxy-GTPase, ec:3.6.1.9 - diphosphatase, ec:3.5.4.3 - deaminase, ec:3.6.1.17 - (asymmetrical), ec:1.17.4.1 - reductase, ec:3.6.1.3 - adenylpyrophosphatase, ec:3.1.4.17 - phosphodiesterase, ec:4.3.2.2 - lyase, ec:1.7.1.7 - reductase, ec:1.17.1.4 - dehydrogenase, ec:2.7.7.4 …
TRINITY_DN13429_c0_g1_i10	Purine metabolism, Thiamine metabolism	map00230, map00730	54, 7	ec:3.6.1.15 - phosphatase, ec:4.6.1.2 - cyclase, ec:3.1.4.35 - phosphodiesterase, ec:3.5.4.10 - cyclohydrolase, ec:3.1.5.1 - deoxy-GTPase, ec:3.6.1.9 - diphosphatase, ec:3.5.4.3 - deaminase, ec:3.6.1.17 - (asymmetrical), ec:1.17.4.1 - reductase, ec:3.6.1.3 - adenylpyrophosphatase, ec:3.1.4.17 - phosphodiesterase, ec:4.3.2.2 - lyase, ec:1.7.1.7 - reductase, ec:1.17.1.4 - dehydrogenase, ec:2.7.7.4 …
TRINITY_DN4960_c0_g3_i1	Pentose phosphate pathway, Purine metabolism	map00030, map00230	17, 54	ec:5.1.3.1 - 3-epimerase, ec:2.7.1.12 - gluconokinase (phosphorylating), ec:5.4.2.2 - (alpha-D-glucose-1,6-bisphosphate-dependent), ec:2.7.1.11 - phosphohexokinase, ec:2.2.1.2 - dihydroxyacetonetransferase, ec:5.3.1.9 - isomerase, ec:4.1.2.4 - aldolase, ec:1.1.1.44 - dehydrogenase (NADP+-dependent, decarboxylating), ec:3.1.3.11 - hexose diphosphatase, ec:5.4.2.7 - phosphodeoxyribomutase, ec:5.3.1…
TRINITY_DN152567_c0_g1_i1	T cell receptor signaling pathway, PD-L1 expression and PD-1 checkpoint pathway in cancer, Th1 and Th2 cell differentiation	map04660, map05235, map04658	2, 1, 1	ec:2.7.10.2 - protein-tyrosine kinase, ec:3.1.3.16 - phosphatase, ec:3.1.3.16 - phosphatase, ec:3.1.3.16 - phosphatase
TRINITY_DN87407_c0_g1_i1	Retinol metabolism	map00830	6	ec:2.3.1.76 - O-fatty-acyltransferase, ec:1.2.1.36 - dehydrogenase, ec:2.4.1.17 - 1-naphthol glucuronyltransferase, ec:1.1.1.105 - dehydrogenase (NAD+), ec:1.3.99.23 - 13,14-reductase, ec:1.1.1.1 - dehydrogenase
TRINITY_DN197247_c0_g1_i1	T cell receptor signaling pathway, PD-L1 expression and PD-1 checkpoint pathway in cancer, Th1 and Th2 cell differentiation	map04660, map05235, map04658	2, 1, 1	ec:2.7.10.2 - protein-tyrosine kinase, ec:3.1.3.16 - phosphatase, ec:3.1.3.16 - phosphatase, ec:3.1.3.16 - phosphatase
TRINITY_DN5033_c0_g1_i17	Drug metabolism - other enzymes, Nitrotoluene degradation, Arginine and proline metabolism, Caffeine metabolism	map00983, map00633, map00330, map00232	20, 1, 21, 3	ec:2.7.1.48 - kinase, ec:3.5.2.2 - hydantoinase, ec:3.1.1.1 - ali-esterase, ec:1.17.4.1 - reductase, ec:2.4.2.10 - phosphoribosyltransferase, ec:3.2.1.31 - beta-glucuronide glucuronohydrolase glucuronidase, ec:3.6.1.23 - diphosphatase, ec:3.5.4.5 - deaminase, ec:6.3.5.2 - synthase (glutamine-hydrolysing), ec:2.3.1.5 - N-acetyltransferase, ec:2.4.1.17 - 1-naphthol glucuronyltransferase, ec:2.4.2.8…
TRINITY_DN5033_c0_g1_i12	Drug metabolism - other enzymes, Nitrotoluene degradation, Arginine and proline metabolism, Caffeine metabolism	map00983, map00633, map00330, map00232	20, 1, 21, 3	ec:2.7.1.48 - kinase, ec:3.5.2.2 - hydantoinase, ec:3.1.1.1 - ali-esterase, ec:1.17.4.1 - reductase, ec:2.4.2.10 - phosphoribosyltransferase, ec:3.2.1.31 - beta-glucuronide glucuronohydrolase glucuronidase, ec:3.6.1.23 - diphosphatase, ec:3.5.4.5 - deaminase, ec:6.3.5.2 - synthase (glutamine-hydrolysing), ec:2.3.1.5 - N-acetyltransferase, ec:2.4.1.17 - 1-naphthol glucuronyltransferase, ec:2.4.2.8…
TRINITY_DN5033_c0_g1_i14	Drug metabolism - other enzymes, Nitrotoluene degradation, Arginine and proline metabolism, Caffeine metabolism	map00983, map00633, map00330, map00232	20, 1, 21, 3	ec:2.7.1.48 - kinase, ec:3.5.2.2 - hydantoinase, ec:3.1.1.1 - ali-esterase, ec:1.17.4.1 - reductase, ec:2.4.2.10 - phosphoribosyltransferase, ec:3.2.1.31 - beta-glucuronide glucuronohydrolase glucuronidase, ec:3.6.1.23 - diphosphatase, ec:3.5.4.5 - deaminase, ec:6.3.5.2 - synthase (glutamine-hydrolysing), ec:2.3.1.5 - N-acetyltransferase, ec:2.4.1.17 - 1-naphthol glucuronyltransferase, ec:2.4.2.8…
TRINITY_DN299_c0_g2_i9	Purine metabolism, Folate biosynthesis, Thiamine metabolism	map00230, map00790, map00730	54, 19, 7	ec:3.6.1.15 - phosphatase, ec:4.6.1.2 - cyclase, ec:3.1.4.35 - phosphodiesterase, ec:3.5.4.10 - cyclohydrolase, ec:3.1.5.1 - deoxy-GTPase, ec:3.6.1.9 - diphosphatase, ec:3.5.4.3 - deaminase, ec:3.6.1.17 - (asymmetrical), ec:1.17.4.1 - reductase, ec:3.6.1.3 - adenylpyrophosphatase, ec:3.1.4.17 - phosphodiesterase, ec:4.3.2.2 - lyase, ec:1.7.1.7 - reductase, ec:1.17.1.4 - dehydrogenase, ec:2.7.7.4 …
TRINITY_DN2049_c0_g1_i1	Carbon fixation pathways in prokaryotes, Citrate cycle (TCA cycle), Glyoxylate and dicarboxylate metabolism	map00720, map00020, map00630	21, 17, 18	ec:1.1.1.35 - dehydrogenase, ec:6.2.1.1 - ligase, ec:6.4.1.3 - carboxylase, ec:4.1.3.25 - lyase, ec:1.5.1.5 - dehydrogenase (NADP+), ec:1.1.1.37 - dehydrogenase, ec:1.1.1.42 - dehydrogenase (NADP+), ec:6.2.1.5 - ligase (ADP-forming), ec:5.1.99.1 - epimerase, ec:1.3.5.1 - dehydrogenase, ec:6.4.1.2 - carboxylase, ec:2.3.3.8 - citrate synthase, ec:1.5.1.20 - reductase [NAD(P)H], ec:5.4.99.2 - mutase…
TRINITY_DN2049_c0_g1_i3	Carbon fixation pathways in prokaryotes, Citrate cycle (TCA cycle), Glyoxylate and dicarboxylate metabolism	map00720, map00020, map00630	21, 17, 18	ec:1.1.1.35 - dehydrogenase, ec:6.2.1.1 - ligase, ec:6.4.1.3 - carboxylase, ec:4.1.3.25 - lyase, ec:1.5.1.5 - dehydrogenase (NADP+), ec:1.1.1.37 - dehydrogenase, ec:1.1.1.42 - dehydrogenase (NADP+), ec:6.2.1.5 - ligase (ADP-forming), ec:5.1.99.1 - epimerase, ec:1.3.5.1 - dehydrogenase, ec:6.4.1.2 - carboxylase, ec:2.3.3.8 - citrate synthase, ec:1.5.1.20 - reductase [NAD(P)H], ec:5.4.99.2 - mutase…
TRINITY_DN2049_c0_g1_i2	Carbon fixation pathways in prokaryotes, Citrate cycle (TCA cycle), Glyoxylate and dicarboxylate metabolism	map00720, map00020, map00630	21, 17, 18	ec:1.1.1.35 - dehydrogenase, ec:6.2.1.1 - ligase, ec:6.4.1.3 - carboxylase, ec:4.1.3.25 - lyase, ec:1.5.1.5 - dehydrogenase (NADP+), ec:1.1.1.37 - dehydrogenase, ec:1.1.1.42 - dehydrogenase (NADP+), ec:6.2.1.5 - ligase (ADP-forming), ec:5.1.99.1 - epimerase, ec:1.3.5.1 - dehydrogenase, ec:6.4.1.2 - carboxylase, ec:2.3.3.8 - citrate synthase, ec:1.5.1.20 - reductase [NAD(P)H], ec:5.4.99.2 - mutase…
TRINITY_DN2049_c0_g1_i5	Carbon fixation pathways in prokaryotes, Citrate cycle (TCA cycle), Glyoxylate and dicarboxylate metabolism	map00720, map00020, map00630	21, 17, 18	ec:1.1.1.35 - dehydrogenase, ec:6.2.1.1 - ligase, ec:6.4.1.3 - carboxylase, ec:4.1.3.25 - lyase, ec:1.5.1.5 - dehydrogenase (NADP+), ec:1.1.1.37 - dehydrogenase, ec:1.1.1.42 - dehydrogenase (NADP+), ec:6.2.1.5 - ligase (ADP-forming), ec:5.1.99.1 - epimerase, ec:1.3.5.1 - dehydrogenase, ec:6.4.1.2 - carboxylase, ec:2.3.3.8 - citrate synthase, ec:1.5.1.20 - reductase [NAD(P)H], ec:5.4.99.2 - mutase…
TRINITY_DN2049_c0_g1_i4	Carbon fixation pathways in prokaryotes, Citrate cycle (TCA cycle), Glyoxylate and dicarboxylate metabolism	map00720, map00020, map00630	21, 17, 18	ec:1.1.1.35 - dehydrogenase, ec:6.2.1.1 - ligase, ec:6.4.1.3 - carboxylase, ec:4.1.3.25 - lyase, ec:1.5.1.5 - dehydrogenase (NADP+), ec:1.1.1.37 - dehydrogenase, ec:1.1.1.42 - dehydrogenase (NADP+), ec:6.2.1.5 - ligase (ADP-forming), ec:5.1.99.1 - epimerase, ec:1.3.5.1 - dehydrogenase, ec:6.4.1.2 - carboxylase, ec:2.3.3.8 - citrate synthase, ec:1.5.1.20 - reductase [NAD(P)H], ec:5.4.99.2 - mutase…
TRINITY_DN2049_c0_g1_i7	Carbon fixation pathways in prokaryotes, Citrate cycle (TCA cycle), Glyoxylate and dicarboxylate metabolism	map00720, map00020, map00630	21, 17, 18	ec:1.1.1.35 - dehydrogenase, ec:6.2.1.1 - ligase, ec:6.4.1.3 - carboxylase, ec:4.1.3.25 - lyase, ec:1.5.1.5 - dehydrogenase (NADP+), ec:1.1.1.37 - dehydrogenase, ec:1.1.1.42 - dehydrogenase (NADP+), ec:6.2.1.5 - ligase (ADP-forming), ec:5.1.99.1 - epimerase, ec:1.3.5.1 - dehydrogenase, ec:6.4.1.2 - carboxylase, ec:2.3.3.8 - citrate synthase, ec:1.5.1.20 - reductase [NAD(P)H], ec:5.4.99.2 - mutase…
TRINITY_DN2049_c0_g1_i6	Carbon fixation pathways in prokaryotes, Citrate cycle (TCA cycle), Glyoxylate and dicarboxylate metabolism	map00720, map00020, map00630	21, 17, 18	ec:1.1.1.35 - dehydrogenase, ec:6.2.1.1 - ligase, ec:6.4.1.3 - carboxylase, ec:4.1.3.25 - lyase, ec:1.5.1.5 - dehydrogenase (NADP+), ec:1.1.1.37 - dehydrogenase, ec:1.1.1.42 - dehydrogenase (NADP+), ec:6.2.1.5 - ligase (ADP-forming), ec:5.1.99.1 - epimerase, ec:1.3.5.1 - dehydrogenase, ec:6.4.1.2 - carboxylase, ec:2.3.3.8 - citrate synthase, ec:1.5.1.20 - reductase [NAD(P)H], ec:5.4.99.2 - mutase…
TRINITY_DN2049_c0_g1_i8	Carbon fixation pathways in prokaryotes, Citrate cycle (TCA cycle), Glyoxylate and dicarboxylate metabolism	map00720, map00020, map00630	21, 17, 18	ec:1.1.1.35 - dehydrogenase, ec:6.2.1.1 - ligase, ec:6.4.1.3 - carboxylase, ec:4.1.3.25 - lyase, ec:1.5.1.5 - dehydrogenase (NADP+), ec:1.1.1.37 - dehydrogenase, ec:1.1.1.42 - dehydrogenase (NADP+), ec:6.2.1.5 - ligase (ADP-forming), ec:5.1.99.1 - epimerase, ec:1.3.5.1 - dehydrogenase, ec:6.4.1.2 - carboxylase, ec:2.3.3.8 - citrate synthase, ec:1.5.1.20 - reductase [NAD(P)H], ec:5.4.99.2 - mutase…
TRINITY_DN1586_c2_g2_i2	Nitrogen metabolism	map00910	7	ec:4.2.1.1 - anhydrase, ec:1.4.1.2 - dehydrogenase, ec:6.3.1.2 - synthetase, ec:1.7.1.4 - reductase [NAD(P)H], ec:1.7.2.1 - reductase (NO-forming), ec:1.18.6.1 - reduced ferredoxin:dinitrogen oxidoreductase (ATP-hydrolysing), ec:1.4.1.3 - dehydrogenase [NAD(P)+]
TRINITY_DN6669_c0_g1_i12	Drug metabolism - other enzymes, Nitrotoluene degradation, Caffeine metabolism	map00983, map00633, map00232	20, 1, 3	ec:2.7.1.48 - kinase, ec:3.5.2.2 - hydantoinase, ec:3.1.1.1 - ali-esterase, ec:1.17.4.1 - reductase, ec:2.4.2.10 - phosphoribosyltransferase, ec:3.2.1.31 - beta-glucuronide glucuronohydrolase glucuronidase, ec:3.6.1.23 - diphosphatase, ec:3.5.4.5 - deaminase, ec:6.3.5.2 - synthase (glutamine-hydrolysing), ec:2.3.1.5 - N-acetyltransferase, ec:2.4.1.17 - 1-naphthol glucuronyltransferase, ec:2.4.2.8…
TRINITY_DN2671_c0_g4_i1	Cysteine and methionine metabolism	map00270	28	ec:3.3.1.1 - S-adenosylhomocysteine synthase, ec:2.6.1.3 - transaminase, ec:6.3.2.3 - synthase, ec:1.1.1.37 - dehydrogenase, ec:4.2.1.109 - 1-phosphate dehydratase, ec:4.2.1.22 - beta-synthase, ec:2.5.1.22 - synthase, ec:5.3.2.5 - enolase, ec:4.1.1.50 - decarboxylase, ec:2.4.2.28 - phosphorylase, ec:2.1.1.13 - synthase, ec:2.1.1.5 - S-methyltransferase, ec:4.3.1.17 - ammonia-lyase, ec:2.6.1.1 - t…
TRINITY_DN14646_c0_g1_i15	T cell receptor signaling pathway, PD-L1 expression and PD-1 checkpoint pathway in cancer, Th1 and Th2 cell differentiation	map04660, map05235, map04658	2, 1, 1	ec:2.7.10.2 - protein-tyrosine kinase, ec:3.1.3.16 - phosphatase, ec:3.1.3.16 - phosphatase, ec:3.1.3.16 - phosphatase
TRINITY_DN2807_c0_g1_i3	Cysteine and methionine metabolism	map00270	28	ec:3.3.1.1 - S-adenosylhomocysteine synthase, ec:2.6.1.3 - transaminase, ec:6.3.2.3 - synthase, ec:1.1.1.37 - dehydrogenase, ec:4.2.1.109 - 1-phosphate dehydratase, ec:4.2.1.22 - beta-synthase, ec:2.5.1.22 - synthase, ec:5.3.2.5 - enolase, ec:4.1.1.50 - decarboxylase, ec:2.4.2.28 - phosphorylase, ec:2.1.1.13 - synthase, ec:2.1.1.5 - S-methyltransferase, ec:4.3.1.17 - ammonia-lyase, ec:2.6.1.1 - t…
TRINITY_DN14646_c0_g1_i16	T cell receptor signaling pathway, PD-L1 expression and PD-1 checkpoint pathway in cancer, Th1 and Th2 cell differentiation	map04660, map05235, map04658	2, 1, 1	ec:2.7.10.2 - protein-tyrosine kinase, ec:3.1.3.16 - phosphatase, ec:3.1.3.16 - phosphatase, ec:3.1.3.16 - phosphatase
TRINITY_DN150316_c0_g1_i1	Porphyrin and chlorophyll metabolism	map00860	19	ec:4.99.1.1 - ferrochelatase, ec:2.3.1.37 - synthase, ec:4.2.1.75 - synthase, ec:1.3.1.24 - reductase, ec:1.14.14.18 - oxygenase (biliverdin-producing), ec:2.5.1.17 - adenosyltransferase, ec:1.3.3.4 - oxidase, ec:1.3.3.3 - oxidase, ec:3.2.1.31 - beta-glucuronide glucuronohydrolase glucuronidase, ec:2.5.1.61 - synthase, ec:4.1.1.37 - decarboxylase, ec:2.4.1.17 - 1-naphthol glucuronyltransferase, e…
TRINITY_DN14646_c0_g1_i17	T cell receptor signaling pathway, PD-L1 expression and PD-1 checkpoint pathway in cancer, Th1 and Th2 cell differentiation	map04660, map05235, map04658	2, 1, 1	ec:2.7.10.2 - protein-tyrosine kinase, ec:3.1.3.16 - phosphatase, ec:3.1.3.16 - phosphatase, ec:3.1.3.16 - phosphatase
TRINITY_DN1587_c1_g1_i1	Purine metabolism, Thiamine metabolism	map00230, map00730	54, 7	ec:3.6.1.15 - phosphatase, ec:4.6.1.2 - cyclase, ec:3.1.4.35 - phosphodiesterase, ec:3.5.4.10 - cyclohydrolase, ec:3.1.5.1 - deoxy-GTPase, ec:3.6.1.9 - diphosphatase, ec:3.5.4.3 - deaminase, ec:3.6.1.17 - (asymmetrical), ec:1.17.4.1 - reductase, ec:3.6.1.3 - adenylpyrophosphatase, ec:3.1.4.17 - phosphodiesterase, ec:4.3.2.2 - lyase, ec:1.7.1.7 - reductase, ec:1.17.1.4 - dehydrogenase, ec:2.7.7.4 …
TRINITY_DN161570_c0_g1_i1	Cysteine and methionine metabolism	map00270	28	ec:3.3.1.1 - S-adenosylhomocysteine synthase, ec:2.6.1.3 - transaminase, ec:6.3.2.3 - synthase, ec:1.1.1.37 - dehydrogenase, ec:4.2.1.109 - 1-phosphate dehydratase, ec:4.2.1.22 - beta-synthase, ec:2.5.1.22 - synthase, ec:5.3.2.5 - enolase, ec:4.1.1.50 - decarboxylase, ec:2.4.2.28 - phosphorylase, ec:2.1.1.13 - synthase, ec:2.1.1.5 - S-methyltransferase, ec:4.3.1.17 - ammonia-lyase, ec:2.6.1.1 - t…
TRINITY_DN2443_c0_g2_i1	Glutathione metabolism, Drug metabolism - cytochrome P450, Oxidative phosphorylation, Drug metabolism - other enzymes, Phenylpropanoid biosynthesis, Metabolism of xenobiotics by cytochrome P450, Arachidonic acid metabolism	map00480, map00982, map00190, map00983, map00940, map00980, map00590	16, 5, 5, 20, 2, 7, 11	ec:3.4.19.13 - gamma-glutamate hydrolase, ec:1.17.4.1 - reductase, ec:4.3.2.7 - gamma-glutamylcyclotransferase, ec:6.3.2.3 - synthase, ec:2.5.1.22 - synthase, ec:1.11.1.15 - to 1.11.1.24 and 1.11.1.25 and 1.11.1.26 and 1.11.1.27 and 1.11.1.28 and 1.11.1.29, ec:4.1.1.17 - decarboxylase, ec:1.1.1.42 - dehydrogenase (NADP+), ec:1.1.1.44 - dehydrogenase (NADP+-dependent, decarboxylating), ec:2.5.1.16…
TRINITY_DN2443_c0_g2_i3	Glutathione metabolism, Drug metabolism - cytochrome P450, Drug metabolism - other enzymes, Metabolism of xenobiotics by cytochrome P450	map00480, map00982, map00983, map00980	16, 5, 20, 7	ec:3.4.19.13 - gamma-glutamate hydrolase, ec:1.17.4.1 - reductase, ec:4.3.2.7 - gamma-glutamylcyclotransferase, ec:6.3.2.3 - synthase, ec:2.5.1.22 - synthase, ec:1.11.1.15 - to 1.11.1.24 and 1.11.1.25 and 1.11.1.26 and 1.11.1.27 and 1.11.1.28 and 1.11.1.29, ec:4.1.1.17 - decarboxylase, ec:1.1.1.42 - dehydrogenase (NADP+), ec:1.1.1.44 - dehydrogenase (NADP+-dependent, decarboxylating), ec:2.5.1.16…
TRINITY_DN284294_c0_g1_i1	Lysine degradation	map00310	18	ec:1.2.1.3 - dehydrogenase (NAD+), ec:1.1.1.35 - dehydrogenase, ec:1.2.1.31 - dehydrogenase, ec:1.2.4.2 - dehydrogenase (succinyl-transferring), ec:1.2.1.47 - dehydrogenase, ec:2.3.1.61 - succinyltransferase, ec:1.8.1.4 - dehydrogenase, ec:1.2.1.19 - dehydrogenase, ec:1.14.11.8 - dioxygenase, ec:1.5.1.9 - dehydrogenase (NAD+, L-glutamate-forming), ec:2.3.1.32 - N-acetyltransferase, ec:2.3.1.9 - C…
TRINITY_DN5721_c1_g1_i7	T cell receptor signaling pathway, PD-L1 expression and PD-1 checkpoint pathway in cancer, Th1 and Th2 cell differentiation	map04660, map05235, map04658	2, 1, 1	ec:2.7.10.2 - protein-tyrosine kinase, ec:3.1.3.16 - phosphatase, ec:3.1.3.16 - phosphatase, ec:3.1.3.16 - phosphatase
TRINITY_DN5721_c1_g1_i6	T cell receptor signaling pathway, PD-L1 expression and PD-1 checkpoint pathway in cancer, Th1 and Th2 cell differentiation	map04660, map05235, map04658	2, 1, 1	ec:2.7.10.2 - protein-tyrosine kinase, ec:3.1.3.16 - phosphatase, ec:3.1.3.16 - phosphatase, ec:3.1.3.16 - phosphatase
TRINITY_DN5721_c1_g1_i5	T cell receptor signaling pathway, PD-L1 expression and PD-1 checkpoint pathway in cancer, Th1 and Th2 cell differentiation	map04660, map05235, map04658	2, 1, 1	ec:2.7.10.2 - protein-tyrosine kinase, ec:3.1.3.16 - phosphatase, ec:3.1.3.16 - phosphatase, ec:3.1.3.16 - phosphatase
TRINITY_DN1868_c5_g2_i13	Purine metabolism, Thiamine metabolism	map00230, map00730	54, 7	ec:3.6.1.15 - phosphatase, ec:4.6.1.2 - cyclase, ec:3.1.4.35 - phosphodiesterase, ec:3.5.4.10 - cyclohydrolase, ec:3.1.5.1 - deoxy-GTPase, ec:3.6.1.9 - diphosphatase, ec:3.5.4.3 - deaminase, ec:3.6.1.17 - (asymmetrical), ec:1.17.4.1 - reductase, ec:3.6.1.3 - adenylpyrophosphatase, ec:3.1.4.17 - phosphodiesterase, ec:4.3.2.2 - lyase, ec:1.7.1.7 - reductase, ec:1.17.1.4 - dehydrogenase, ec:2.7.7.4 …
TRINITY_DN14157_c0_g3_i1	Purine metabolism, Thiamine metabolism	map00230, map00730	54, 7	ec:3.6.1.15 - phosphatase, ec:4.6.1.2 - cyclase, ec:3.1.4.35 - phosphodiesterase, ec:3.5.4.10 - cyclohydrolase, ec:3.1.5.1 - deoxy-GTPase, ec:3.6.1.9 - diphosphatase, ec:3.5.4.3 - deaminase, ec:3.6.1.17 - (asymmetrical), ec:1.17.4.1 - reductase, ec:3.6.1.3 - adenylpyrophosphatase, ec:3.1.4.17 - phosphodiesterase, ec:4.3.2.2 - lyase, ec:1.7.1.7 - reductase, ec:1.17.1.4 - dehydrogenase, ec:2.7.7.4 …
TRINITY_DN1868_c5_g2_i12	Purine metabolism, Thiamine metabolism	map00230, map00730	54, 7	ec:3.6.1.15 - phosphatase, ec:4.6.1.2 - cyclase, ec:3.1.4.35 - phosphodiesterase, ec:3.5.4.10 - cyclohydrolase, ec:3.1.5.1 - deoxy-GTPase, ec:3.6.1.9 - diphosphatase, ec:3.5.4.3 - deaminase, ec:3.6.1.17 - (asymmetrical), ec:1.17.4.1 - reductase, ec:3.6.1.3 - adenylpyrophosphatase, ec:3.1.4.17 - phosphodiesterase, ec:4.3.2.2 - lyase, ec:1.7.1.7 - reductase, ec:1.17.1.4 - dehydrogenase, ec:2.7.7.4 …
TRINITY_DN1868_c5_g2_i11	Purine metabolism, Thiamine metabolism	map00230, map00730	54, 7	ec:3.6.1.15 - phosphatase, ec:4.6.1.2 - cyclase, ec:3.1.4.35 - phosphodiesterase, ec:3.5.4.10 - cyclohydrolase, ec:3.1.5.1 - deoxy-GTPase, ec:3.6.1.9 - diphosphatase, ec:3.5.4.3 - deaminase, ec:3.6.1.17 - (asymmetrical), ec:1.17.4.1 - reductase, ec:3.6.1.3 - adenylpyrophosphatase, ec:3.1.4.17 - phosphodiesterase, ec:4.3.2.2 - lyase, ec:1.7.1.7 - reductase, ec:1.17.1.4 - dehydrogenase, ec:2.7.7.4 …
TRINITY_DN16303_c0_g1_i5	Purine metabolism, Thiamine metabolism	map00230, map00730	54, 7	ec:3.6.1.15 - phosphatase, ec:4.6.1.2 - cyclase, ec:3.1.4.35 - phosphodiesterase, ec:3.5.4.10 - cyclohydrolase, ec:3.1.5.1 - deoxy-GTPase, ec:3.6.1.9 - diphosphatase, ec:3.5.4.3 - deaminase, ec:3.6.1.17 - (asymmetrical), ec:1.17.4.1 - reductase, ec:3.6.1.3 - adenylpyrophosphatase, ec:3.1.4.17 - phosphodiesterase, ec:4.3.2.2 - lyase, ec:1.7.1.7 - reductase, ec:1.17.1.4 - dehydrogenase, ec:2.7.7.4 …
TRINITY_DN1868_c5_g2_i10	Purine metabolism, Thiamine metabolism	map00230, map00730	54, 7	ec:3.6.1.15 - phosphatase, ec:4.6.1.2 - cyclase, ec:3.1.4.35 - phosphodiesterase, ec:3.5.4.10 - cyclohydrolase, ec:3.1.5.1 - deoxy-GTPase, ec:3.6.1.9 - diphosphatase, ec:3.5.4.3 - deaminase, ec:3.6.1.17 - (asymmetrical), ec:1.17.4.1 - reductase, ec:3.6.1.3 - adenylpyrophosphatase, ec:3.1.4.17 - phosphodiesterase, ec:4.3.2.2 - lyase, ec:1.7.1.7 - reductase, ec:1.17.1.4 - dehydrogenase, ec:2.7.7.4 …
TRINITY_DN16303_c0_g1_i4	Purine metabolism, Thiamine metabolism	map00230, map00730	54, 7	ec:3.6.1.15 - phosphatase, ec:4.6.1.2 - cyclase, ec:3.1.4.35 - phosphodiesterase, ec:3.5.4.10 - cyclohydrolase, ec:3.1.5.1 - deoxy-GTPase, ec:3.6.1.9 - diphosphatase, ec:3.5.4.3 - deaminase, ec:3.6.1.17 - (asymmetrical), ec:1.17.4.1 - reductase, ec:3.6.1.3 - adenylpyrophosphatase, ec:3.1.4.17 - phosphodiesterase, ec:4.3.2.2 - lyase, ec:1.7.1.7 - reductase, ec:1.17.1.4 - dehydrogenase, ec:2.7.7.4 …
TRINITY_DN5721_c1_g1_i4	T cell receptor signaling pathway, PD-L1 expression and PD-1 checkpoint pathway in cancer, Th1 and Th2 cell differentiation	map04660, map05235, map04658	2, 1, 1	ec:2.7.10.2 - protein-tyrosine kinase, ec:3.1.3.16 - phosphatase, ec:3.1.3.16 - phosphatase, ec:3.1.3.16 - phosphatase
TRINITY_DN38692_c4_g1_i1	Aminoacyl-tRNA biosynthesis	map00970	22	ec:6.1.1.22 - ligase, ec:6.1.1.19 - ligase, ec:2.1.2.9 - formyltransferase, ec:6.1.1.9 - ligase, ec:6.1.1.3 - ligase, ec:6.1.1.15 - ligase, ec:6.1.1.5 - ligase, ec:6.1.1.10 - ligase, ec:6.1.1.21 - ligase, ec:6.1.1.18 - ligase, ec:6.1.1.7 - ligase, ec:6.1.1.12 - ligase, ec:6.1.1.2 - ligase, ec:6.3.5.7 - synthase (glutamine-hydrolysing), ec:6.1.1.14 - ligase, ec:6.1.1.4 - ligase, ec:6.1.1.20 - liga…
TRINITY_DN4116_c0_g1_i5	Purine metabolism, Thiamine metabolism	map00230, map00730	54, 7	ec:3.6.1.15 - phosphatase, ec:4.6.1.2 - cyclase, ec:3.1.4.35 - phosphodiesterase, ec:3.5.4.10 - cyclohydrolase, ec:3.1.5.1 - deoxy-GTPase, ec:3.6.1.9 - diphosphatase, ec:3.5.4.3 - deaminase, ec:3.6.1.17 - (asymmetrical), ec:1.17.4.1 - reductase, ec:3.6.1.3 - adenylpyrophosphatase, ec:3.1.4.17 - phosphodiesterase, ec:4.3.2.2 - lyase, ec:1.7.1.7 - reductase, ec:1.17.1.4 - dehydrogenase, ec:2.7.7.4 …
TRINITY_DN20275_c0_g1_i5	Glycosaminoglycan biosynthesis - keratan sulfate, Various types of N-glycan biosynthesis, N-Glycan biosynthesis	map00533, map00513, map00510	4, 13, 20	ec:2.4.1.38 - beta-1,4-galactosyltransferase, ec:2.4.1.68 - 6-alpha-L-fucosyltransferase, ec:2.4.99.4 - alpha-2,3-sialyltransferase, ec:2.4.1.149 - beta-1,3-N-acetylglucosaminyltransferase, ec:2.4.1.38 - beta-1,4-galactosyltransferase, ec:2.4.1.101 - 2-beta-N-acetylglucosaminyltransferase, ec:2.4.1.68 - 6-alpha-L-fucosyltransferase, ec:2.4.1.131 - alpha-1,2-mannosyltransferase, ec:2.4.1.258 - alp…
TRINITY_DN13519_c0_g1_i10	T cell receptor signaling pathway, PD-L1 expression and PD-1 checkpoint pathway in cancer, Th1 and Th2 cell differentiation	map04660, map05235, map04658	2, 1, 1	ec:2.7.10.2 - protein-tyrosine kinase, ec:3.1.3.16 - phosphatase, ec:3.1.3.16 - phosphatase, ec:3.1.3.16 - phosphatase
TRINITY_DN4116_c0_g1_i6	Purine metabolism, Thiamine metabolism	map00230, map00730	54, 7	ec:3.6.1.15 - phosphatase, ec:4.6.1.2 - cyclase, ec:3.1.4.35 - phosphodiesterase, ec:3.5.4.10 - cyclohydrolase, ec:3.1.5.1 - deoxy-GTPase, ec:3.6.1.9 - diphosphatase, ec:3.5.4.3 - deaminase, ec:3.6.1.17 - (asymmetrical), ec:1.17.4.1 - reductase, ec:3.6.1.3 - adenylpyrophosphatase, ec:3.1.4.17 - phosphodiesterase, ec:4.3.2.2 - lyase, ec:1.7.1.7 - reductase, ec:1.17.1.4 - dehydrogenase, ec:2.7.7.4 …
TRINITY_DN20275_c0_g1_i4	Glycosaminoglycan biosynthesis - keratan sulfate, Various types of N-glycan biosynthesis, N-Glycan biosynthesis	map00533, map00513, map00510	4, 13, 20	ec:2.4.1.38 - beta-1,4-galactosyltransferase, ec:2.4.1.68 - 6-alpha-L-fucosyltransferase, ec:2.4.99.4 - alpha-2,3-sialyltransferase, ec:2.4.1.149 - beta-1,3-N-acetylglucosaminyltransferase, ec:2.4.1.38 - beta-1,4-galactosyltransferase, ec:2.4.1.101 - 2-beta-N-acetylglucosaminyltransferase, ec:2.4.1.68 - 6-alpha-L-fucosyltransferase, ec:2.4.1.131 - alpha-1,2-mannosyltransferase, ec:2.4.1.258 - alp…
TRINITY_DN4116_c0_g1_i3	Purine metabolism, Thiamine metabolism	map00230, map00730	54, 7	ec:3.6.1.15 - phosphatase, ec:4.6.1.2 - cyclase, ec:3.1.4.35 - phosphodiesterase, ec:3.5.4.10 - cyclohydrolase, ec:3.1.5.1 - deoxy-GTPase, ec:3.6.1.9 - diphosphatase, ec:3.5.4.3 - deaminase, ec:3.6.1.17 - (asymmetrical), ec:1.17.4.1 - reductase, ec:3.6.1.3 - adenylpyrophosphatase, ec:3.1.4.17 - phosphodiesterase, ec:4.3.2.2 - lyase, ec:1.7.1.7 - reductase, ec:1.17.1.4 - dehydrogenase, ec:2.7.7.4 …
TRINITY_DN4116_c0_g1_i4	Purine metabolism, Thiamine metabolism	map00230, map00730	54, 7	ec:3.6.1.15 - phosphatase, ec:4.6.1.2 - cyclase, ec:3.1.4.35 - phosphodiesterase, ec:3.5.4.10 - cyclohydrolase, ec:3.1.5.1 - deoxy-GTPase, ec:3.6.1.9 - diphosphatase, ec:3.5.4.3 - deaminase, ec:3.6.1.17 - (asymmetrical), ec:1.17.4.1 - reductase, ec:3.6.1.3 - adenylpyrophosphatase, ec:3.1.4.17 - phosphodiesterase, ec:4.3.2.2 - lyase, ec:1.7.1.7 - reductase, ec:1.17.1.4 - dehydrogenase, ec:2.7.7.4 …
TRINITY_DN13519_c0_g1_i13	T cell receptor signaling pathway, PD-L1 expression and PD-1 checkpoint pathway in cancer, Th1 and Th2 cell differentiation	map04660, map05235, map04658	2, 1, 1	ec:2.7.10.2 - protein-tyrosine kinase, ec:3.1.3.16 - phosphatase, ec:3.1.3.16 - phosphatase, ec:3.1.3.16 - phosphatase
TRINITY_DN4116_c0_g1_i1	Purine metabolism, Thiamine metabolism	map00230, map00730	54, 7	ec:3.6.1.15 - phosphatase, ec:4.6.1.2 - cyclase, ec:3.1.4.35 - phosphodiesterase, ec:3.5.4.10 - cyclohydrolase, ec:3.1.5.1 - deoxy-GTPase, ec:3.6.1.9 - diphosphatase, ec:3.5.4.3 - deaminase, ec:3.6.1.17 - (asymmetrical), ec:1.17.4.1 - reductase, ec:3.6.1.3 - adenylpyrophosphatase, ec:3.1.4.17 - phosphodiesterase, ec:4.3.2.2 - lyase, ec:1.7.1.7 - reductase, ec:1.17.1.4 - dehydrogenase, ec:2.7.7.4 …
TRINITY_DN13519_c0_g1_i14	T cell receptor signaling pathway, PD-L1 expression and PD-1 checkpoint pathway in cancer, Th1 and Th2 cell differentiation	map04660, map05235, map04658	2, 1, 1	ec:2.7.10.2 - protein-tyrosine kinase, ec:3.1.3.16 - phosphatase, ec:3.1.3.16 - phosphatase, ec:3.1.3.16 - phosphatase
TRINITY_DN4116_c0_g1_i2	Purine metabolism, Thiamine metabolism	map00230, map00730	54, 7	ec:3.6.1.15 - phosphatase, ec:4.6.1.2 - cyclase, ec:3.1.4.35 - phosphodiesterase, ec:3.5.4.10 - cyclohydrolase, ec:3.1.5.1 - deoxy-GTPase, ec:3.6.1.9 - diphosphatase, ec:3.5.4.3 - deaminase, ec:3.6.1.17 - (asymmetrical), ec:1.17.4.1 - reductase, ec:3.6.1.3 - adenylpyrophosphatase, ec:3.1.4.17 - phosphodiesterase, ec:4.3.2.2 - lyase, ec:1.7.1.7 - reductase, ec:1.17.1.4 - dehydrogenase, ec:2.7.7.4 …
TRINITY_DN13519_c0_g1_i12	T cell receptor signaling pathway, PD-L1 expression and PD-1 checkpoint pathway in cancer, Th1 and Th2 cell differentiation	map04660, map05235, map04658	2, 1, 1	ec:2.7.10.2 - protein-tyrosine kinase, ec:3.1.3.16 - phosphatase, ec:3.1.3.16 - phosphatase, ec:3.1.3.16 - phosphatase
TRINITY_DN174420_c0_g1_i1	Purine metabolism, Thiamine metabolism	map00230, map00730	54, 7	ec:3.6.1.15 - phosphatase, ec:4.6.1.2 - cyclase, ec:3.1.4.35 - phosphodiesterase, ec:3.5.4.10 - cyclohydrolase, ec:3.1.5.1 - deoxy-GTPase, ec:3.6.1.9 - diphosphatase, ec:3.5.4.3 - deaminase, ec:3.6.1.17 - (asymmetrical), ec:1.17.4.1 - reductase, ec:3.6.1.3 - adenylpyrophosphatase, ec:3.1.4.17 - phosphodiesterase, ec:4.3.2.2 - lyase, ec:1.7.1.7 - reductase, ec:1.17.1.4 - dehydrogenase, ec:2.7.7.4 …
TRINITY_DN69428_c0_g3_i1	Purine metabolism, Thiamine metabolism	map00230, map00730	54, 7	ec:3.6.1.15 - phosphatase, ec:4.6.1.2 - cyclase, ec:3.1.4.35 - phosphodiesterase, ec:3.5.4.10 - cyclohydrolase, ec:3.1.5.1 - deoxy-GTPase, ec:3.6.1.9 - diphosphatase, ec:3.5.4.3 - deaminase, ec:3.6.1.17 - (asymmetrical), ec:1.17.4.1 - reductase, ec:3.6.1.3 - adenylpyrophosphatase, ec:3.1.4.17 - phosphodiesterase, ec:4.3.2.2 - lyase, ec:1.7.1.7 - reductase, ec:1.17.1.4 - dehydrogenase, ec:2.7.7.4 …
TRINITY_DN4116_c0_g1_i7	Purine metabolism, Thiamine metabolism	map00230, map00730	54, 7	ec:3.6.1.15 - phosphatase, ec:4.6.1.2 - cyclase, ec:3.1.4.35 - phosphodiesterase, ec:3.5.4.10 - cyclohydrolase, ec:3.1.5.1 - deoxy-GTPase, ec:3.6.1.9 - diphosphatase, ec:3.5.4.3 - deaminase, ec:3.6.1.17 - (asymmetrical), ec:1.17.4.1 - reductase, ec:3.6.1.3 - adenylpyrophosphatase, ec:3.1.4.17 - phosphodiesterase, ec:4.3.2.2 - lyase, ec:1.7.1.7 - reductase, ec:1.17.1.4 - dehydrogenase, ec:2.7.7.4 …
TRINITY_DN4116_c0_g1_i8	Purine metabolism, Thiamine metabolism	map00230, map00730	54, 7	ec:3.6.1.15 - phosphatase, ec:4.6.1.2 - cyclase, ec:3.1.4.35 - phosphodiesterase, ec:3.5.4.10 - cyclohydrolase, ec:3.1.5.1 - deoxy-GTPase, ec:3.6.1.9 - diphosphatase, ec:3.5.4.3 - deaminase, ec:3.6.1.17 - (asymmetrical), ec:1.17.4.1 - reductase, ec:3.6.1.3 - adenylpyrophosphatase, ec:3.1.4.17 - phosphodiesterase, ec:4.3.2.2 - lyase, ec:1.7.1.7 - reductase, ec:1.17.1.4 - dehydrogenase, ec:2.7.7.4 …
TRINITY_DN169244_c0_g1_i1	Purine metabolism, Thiamine metabolism	map00230, map00730	54, 7	ec:3.6.1.15 - phosphatase, ec:4.6.1.2 - cyclase, ec:3.1.4.35 - phosphodiesterase, ec:3.5.4.10 - cyclohydrolase, ec:3.1.5.1 - deoxy-GTPase, ec:3.6.1.9 - diphosphatase, ec:3.5.4.3 - deaminase, ec:3.6.1.17 - (asymmetrical), ec:1.17.4.1 - reductase, ec:3.6.1.3 - adenylpyrophosphatase, ec:3.1.4.17 - phosphodiesterase, ec:4.3.2.2 - lyase, ec:1.7.1.7 - reductase, ec:1.17.1.4 - dehydrogenase, ec:2.7.7.4 …
TRINITY_DN42131_c1_g1_i1	Purine metabolism, Thiamine metabolism	map00230, map00730	54, 7	ec:3.6.1.15 - phosphatase, ec:4.6.1.2 - cyclase, ec:3.1.4.35 - phosphodiesterase, ec:3.5.4.10 - cyclohydrolase, ec:3.1.5.1 - deoxy-GTPase, ec:3.6.1.9 - diphosphatase, ec:3.5.4.3 - deaminase, ec:3.6.1.17 - (asymmetrical), ec:1.17.4.1 - reductase, ec:3.6.1.3 - adenylpyrophosphatase, ec:3.1.4.17 - phosphodiesterase, ec:4.3.2.2 - lyase, ec:1.7.1.7 - reductase, ec:1.17.1.4 - dehydrogenase, ec:2.7.7.4 …
TRINITY_DN217073_c0_g1_i1	Nitrogen metabolism	map00910	7	ec:4.2.1.1 - anhydrase, ec:1.4.1.2 - dehydrogenase, ec:6.3.1.2 - synthetase, ec:1.7.1.4 - reductase [NAD(P)H], ec:1.7.2.1 - reductase (NO-forming), ec:1.18.6.1 - reduced ferredoxin:dinitrogen oxidoreductase (ATP-hydrolysing), ec:1.4.1.3 - dehydrogenase [NAD(P)+]
TRINITY_DN10988_c0_g1_i3	Drug metabolism - other enzymes, Purine metabolism	map00983, map00230	20, 54	ec:2.7.1.48 - kinase, ec:3.5.2.2 - hydantoinase, ec:3.1.1.1 - ali-esterase, ec:1.17.4.1 - reductase, ec:2.4.2.10 - phosphoribosyltransferase, ec:3.2.1.31 - beta-glucuronide glucuronohydrolase glucuronidase, ec:3.6.1.23 - diphosphatase, ec:3.5.4.5 - deaminase, ec:6.3.5.2 - synthase (glutamine-hydrolysing), ec:2.3.1.5 - N-acetyltransferase, ec:2.4.1.17 - 1-naphthol glucuronyltransferase, ec:2.4.2.8…
TRINITY_DN33474_c2_g1_i3	T cell receptor signaling pathway, PD-L1 expression and PD-1 checkpoint pathway in cancer, Th1 and Th2 cell differentiation	map04660, map05235, map04658	2, 1, 1	ec:2.7.10.2 - protein-tyrosine kinase, ec:3.1.3.16 - phosphatase, ec:3.1.3.16 - phosphatase, ec:3.1.3.16 - phosphatase
TRINITY_DN10988_c0_g1_i1	Drug metabolism - other enzymes, Purine metabolism	map00983, map00230	20, 54	ec:2.7.1.48 - kinase, ec:3.5.2.2 - hydantoinase, ec:3.1.1.1 - ali-esterase, ec:1.17.4.1 - reductase, ec:2.4.2.10 - phosphoribosyltransferase, ec:3.2.1.31 - beta-glucuronide glucuronohydrolase glucuronidase, ec:3.6.1.23 - diphosphatase, ec:3.5.4.5 - deaminase, ec:6.3.5.2 - synthase (glutamine-hydrolysing), ec:2.3.1.5 - N-acetyltransferase, ec:2.4.1.17 - 1-naphthol glucuronyltransferase, ec:2.4.2.8…
TRINITY_DN10988_c0_g1_i2	Drug metabolism - other enzymes, Purine metabolism	map00983, map00230	20, 54	ec:2.7.1.48 - kinase, ec:3.5.2.2 - hydantoinase, ec:3.1.1.1 - ali-esterase, ec:1.17.4.1 - reductase, ec:2.4.2.10 - phosphoribosyltransferase, ec:3.2.1.31 - beta-glucuronide glucuronohydrolase glucuronidase, ec:3.6.1.23 - diphosphatase, ec:3.5.4.5 - deaminase, ec:6.3.5.2 - synthase (glutamine-hydrolysing), ec:2.3.1.5 - N-acetyltransferase, ec:2.4.1.17 - 1-naphthol glucuronyltransferase, ec:2.4.2.8…
TRINITY_DN14239_c1_g1_i1	Glutathione metabolism, Drug metabolism - cytochrome P450, Drug metabolism - other enzymes, Metabolism of xenobiotics by cytochrome P450	map00480, map00982, map00983, map00980	16, 5, 20, 7	ec:3.4.19.13 - gamma-glutamate hydrolase, ec:1.17.4.1 - reductase, ec:4.3.2.7 - gamma-glutamylcyclotransferase, ec:6.3.2.3 - synthase, ec:2.5.1.22 - synthase, ec:1.11.1.15 - to 1.11.1.24 and 1.11.1.25 and 1.11.1.26 and 1.11.1.27 and 1.11.1.28 and 1.11.1.29, ec:4.1.1.17 - decarboxylase, ec:1.1.1.42 - dehydrogenase (NADP+), ec:1.1.1.44 - dehydrogenase (NADP+-dependent, decarboxylating), ec:2.5.1.16…
TRINITY_DN13028_c0_g2_i1	Purine metabolism, Thiamine metabolism	map00230, map00730	54, 7	ec:3.6.1.15 - phosphatase, ec:4.6.1.2 - cyclase, ec:3.1.4.35 - phosphodiesterase, ec:3.5.4.10 - cyclohydrolase, ec:3.1.5.1 - deoxy-GTPase, ec:3.6.1.9 - diphosphatase, ec:3.5.4.3 - deaminase, ec:3.6.1.17 - (asymmetrical), ec:1.17.4.1 - reductase, ec:3.6.1.3 - adenylpyrophosphatase, ec:3.1.4.17 - phosphodiesterase, ec:4.3.2.2 - lyase, ec:1.7.1.7 - reductase, ec:1.17.1.4 - dehydrogenase, ec:2.7.7.4 …
TRINITY_DN6980_c0_g1_i6	Purine metabolism, Thiamine metabolism	map00230, map00730	54, 7	ec:3.6.1.15 - phosphatase, ec:4.6.1.2 - cyclase, ec:3.1.4.35 - phosphodiesterase, ec:3.5.4.10 - cyclohydrolase, ec:3.1.5.1 - deoxy-GTPase, ec:3.6.1.9 - diphosphatase, ec:3.5.4.3 - deaminase, ec:3.6.1.17 - (asymmetrical), ec:1.17.4.1 - reductase, ec:3.6.1.3 - adenylpyrophosphatase, ec:3.1.4.17 - phosphodiesterase, ec:4.3.2.2 - lyase, ec:1.7.1.7 - reductase, ec:1.17.1.4 - dehydrogenase, ec:2.7.7.4 …
TRINITY_DN46554_c0_g1_i2	T cell receptor signaling pathway	map04660	2	ec:2.7.10.2 - protein-tyrosine kinase, ec:3.1.3.16 - phosphatase
TRINITY_DN123845_c0_g1_i1	Purine metabolism, Thiamine metabolism	map00230, map00730	54, 7	ec:3.6.1.15 - phosphatase, ec:4.6.1.2 - cyclase, ec:3.1.4.35 - phosphodiesterase, ec:3.5.4.10 - cyclohydrolase, ec:3.1.5.1 - deoxy-GTPase, ec:3.6.1.9 - diphosphatase, ec:3.5.4.3 - deaminase, ec:3.6.1.17 - (asymmetrical), ec:1.17.4.1 - reductase, ec:3.6.1.3 - adenylpyrophosphatase, ec:3.1.4.17 - phosphodiesterase, ec:4.3.2.2 - lyase, ec:1.7.1.7 - reductase, ec:1.17.1.4 - dehydrogenase, ec:2.7.7.4 …
TRINITY_DN46554_c0_g1_i1	T cell receptor signaling pathway	map04660	2	ec:2.7.10.2 - protein-tyrosine kinase, ec:3.1.3.16 - phosphatase
TRINITY_DN6980_c0_g1_i4	Purine metabolism, Thiamine metabolism	map00230, map00730	54, 7	ec:3.6.1.15 - phosphatase, ec:4.6.1.2 - cyclase, ec:3.1.4.35 - phosphodiesterase, ec:3.5.4.10 - cyclohydrolase, ec:3.1.5.1 - deoxy-GTPase, ec:3.6.1.9 - diphosphatase, ec:3.5.4.3 - deaminase, ec:3.6.1.17 - (asymmetrical), ec:1.17.4.1 - reductase, ec:3.6.1.3 - adenylpyrophosphatase, ec:3.1.4.17 - phosphodiesterase, ec:4.3.2.2 - lyase, ec:1.7.1.7 - reductase, ec:1.17.1.4 - dehydrogenase, ec:2.7.7.4 …
TRINITY_DN135021_c0_g1_i1	Purine metabolism, Thiamine metabolism	map00230, map00730	54, 7	ec:3.6.1.15 - phosphatase, ec:4.6.1.2 - cyclase, ec:3.1.4.35 - phosphodiesterase, ec:3.5.4.10 - cyclohydrolase, ec:3.1.5.1 - deoxy-GTPase, ec:3.6.1.9 - diphosphatase, ec:3.5.4.3 - deaminase, ec:3.6.1.17 - (asymmetrical), ec:1.17.4.1 - reductase, ec:3.6.1.3 - adenylpyrophosphatase, ec:3.1.4.17 - phosphodiesterase, ec:4.3.2.2 - lyase, ec:1.7.1.7 - reductase, ec:1.17.1.4 - dehydrogenase, ec:2.7.7.4 …
TRINITY_DN31633_c0_g2_i1	Porphyrin and chlorophyll metabolism	map00860	19	ec:4.99.1.1 - ferrochelatase, ec:2.3.1.37 - synthase, ec:4.2.1.75 - synthase, ec:1.3.1.24 - reductase, ec:1.14.14.18 - oxygenase (biliverdin-producing), ec:2.5.1.17 - adenosyltransferase, ec:1.3.3.4 - oxidase, ec:1.3.3.3 - oxidase, ec:3.2.1.31 - beta-glucuronide glucuronohydrolase glucuronidase, ec:2.5.1.61 - synthase, ec:4.1.1.37 - decarboxylase, ec:2.4.1.17 - 1-naphthol glucuronyltransferase, e…
TRINITY_DN151397_c0_g1_i1	Purine metabolism, Thiamine metabolism	map00230, map00730	54, 7	ec:3.6.1.15 - phosphatase, ec:4.6.1.2 - cyclase, ec:3.1.4.35 - phosphodiesterase, ec:3.5.4.10 - cyclohydrolase, ec:3.1.5.1 - deoxy-GTPase, ec:3.6.1.9 - diphosphatase, ec:3.5.4.3 - deaminase, ec:3.6.1.17 - (asymmetrical), ec:1.17.4.1 - reductase, ec:3.6.1.3 - adenylpyrophosphatase, ec:3.1.4.17 - phosphodiesterase, ec:4.3.2.2 - lyase, ec:1.7.1.7 - reductase, ec:1.17.1.4 - dehydrogenase, ec:2.7.7.4 …
TRINITY_DN10138_c0_g1_i3	Citrate cycle (TCA cycle), Tryptophan metabolism, Lysine degradation	map00020, map00380, map00310	17, 17, 18	ec:4.1.1.32 - carboxykinase (GTP), ec:2.3.1.12 - acetyltransferase, ec:1.2.4.2 - dehydrogenase (succinyl-transferring), ec:2.3.1.61 - succinyltransferase, ec:1.8.1.4 - dehydrogenase, ec:1.1.1.37 - dehydrogenase, ec:1.1.1.42 - dehydrogenase (NADP+), ec:2.3.3.1 - (Si)-synthase, ec:6.2.1.5 - ligase (ADP-forming), ec:1.3.5.1 - dehydrogenase, ec:1.2.4.1 - dehydrogenase (acetyl-transferring), ec:2.3.3.…
TRINITY_DN1442_c1_g1_i4	Purine metabolism, Thiamine metabolism	map00230, map00730	54, 7	ec:3.6.1.15 - phosphatase, ec:4.6.1.2 - cyclase, ec:3.1.4.35 - phosphodiesterase, ec:3.5.4.10 - cyclohydrolase, ec:3.1.5.1 - deoxy-GTPase, ec:3.6.1.9 - diphosphatase, ec:3.5.4.3 - deaminase, ec:3.6.1.17 - (asymmetrical), ec:1.17.4.1 - reductase, ec:3.6.1.3 - adenylpyrophosphatase, ec:3.1.4.17 - phosphodiesterase, ec:4.3.2.2 - lyase, ec:1.7.1.7 - reductase, ec:1.17.1.4 - dehydrogenase, ec:2.7.7.4 …
TRINITY_DN283971_c0_g1_i1	Starch and sucrose metabolism	map00500	21	ec:3.2.1.10 - limit dextrinase (erroneous), ec:3.2.1.26 - invertase, ec:3.6.1.9 - diphosphatase, ec:3.2.1.20 - maltase, ec:2.7.7.9 - uridylyltransferase, ec:3.2.1.1 - glycogenase, ec:3.2.1.28 - trehalase, ec:2.7.1.2 - glucokinase (phosphorylating), ec:5.4.2.2 - (alpha-D-glucose-1,6-bisphosphate-dependent), ec:2.4.1.18 - branching enzyme, ec:2.7.1.4 - fructokinase (phosphorylating), ec:5.3.1.9 - i…
TRINITY_DN2048_c0_g1_i7	Drug metabolism - other enzymes, Nitrotoluene degradation, Caffeine metabolism	map00983, map00633, map00232	20, 1, 3	ec:2.7.1.48 - kinase, ec:3.5.2.2 - hydantoinase, ec:3.1.1.1 - ali-esterase, ec:1.17.4.1 - reductase, ec:2.4.2.10 - phosphoribosyltransferase, ec:3.2.1.31 - beta-glucuronide glucuronohydrolase glucuronidase, ec:3.6.1.23 - diphosphatase, ec:3.5.4.5 - deaminase, ec:6.3.5.2 - synthase (glutamine-hydrolysing), ec:2.3.1.5 - N-acetyltransferase, ec:2.4.1.17 - 1-naphthol glucuronyltransferase, ec:2.4.2.8…
TRINITY_DN3035_c0_g2_i7	Purine metabolism, Thiamine metabolism	map00230, map00730	54, 7	ec:3.6.1.15 - phosphatase, ec:4.6.1.2 - cyclase, ec:3.1.4.35 - phosphodiesterase, ec:3.5.4.10 - cyclohydrolase, ec:3.1.5.1 - deoxy-GTPase, ec:3.6.1.9 - diphosphatase, ec:3.5.4.3 - deaminase, ec:3.6.1.17 - (asymmetrical), ec:1.17.4.1 - reductase, ec:3.6.1.3 - adenylpyrophosphatase, ec:3.1.4.17 - phosphodiesterase, ec:4.3.2.2 - lyase, ec:1.7.1.7 - reductase, ec:1.17.1.4 - dehydrogenase, ec:2.7.7.4 …
TRINITY_DN3035_c0_g2_i5	Purine metabolism, Thiamine metabolism	map00230, map00730	54, 7	ec:3.6.1.15 - phosphatase, ec:4.6.1.2 - cyclase, ec:3.1.4.35 - phosphodiesterase, ec:3.5.4.10 - cyclohydrolase, ec:3.1.5.1 - deoxy-GTPase, ec:3.6.1.9 - diphosphatase, ec:3.5.4.3 - deaminase, ec:3.6.1.17 - (asymmetrical), ec:1.17.4.1 - reductase, ec:3.6.1.3 - adenylpyrophosphatase, ec:3.1.4.17 - phosphodiesterase, ec:4.3.2.2 - lyase, ec:1.7.1.7 - reductase, ec:1.17.1.4 - dehydrogenase, ec:2.7.7.4 …
TRINITY_DN13429_c0_g1_i4	Purine metabolism, Thiamine metabolism	map00230, map00730	54, 7	ec:3.6.1.15 - phosphatase, ec:4.6.1.2 - cyclase, ec:3.1.4.35 - phosphodiesterase, ec:3.5.4.10 - cyclohydrolase, ec:3.1.5.1 - deoxy-GTPase, ec:3.6.1.9 - diphosphatase, ec:3.5.4.3 - deaminase, ec:3.6.1.17 - (asymmetrical), ec:1.17.4.1 - reductase, ec:3.6.1.3 - adenylpyrophosphatase, ec:3.1.4.17 - phosphodiesterase, ec:4.3.2.2 - lyase, ec:1.7.1.7 - reductase, ec:1.17.1.4 - dehydrogenase, ec:2.7.7.4 …
TRINITY_DN3035_c0_g2_i6	Purine metabolism, Thiamine metabolism	map00230, map00730	54, 7	ec:3.6.1.15 - phosphatase, ec:4.6.1.2 - cyclase, ec:3.1.4.35 - phosphodiesterase, ec:3.5.4.10 - cyclohydrolase, ec:3.1.5.1 - deoxy-GTPase, ec:3.6.1.9 - diphosphatase, ec:3.5.4.3 - deaminase, ec:3.6.1.17 - (asymmetrical), ec:1.17.4.1 - reductase, ec:3.6.1.3 - adenylpyrophosphatase, ec:3.1.4.17 - phosphodiesterase, ec:4.3.2.2 - lyase, ec:1.7.1.7 - reductase, ec:1.17.1.4 - dehydrogenase, ec:2.7.7.4 …
TRINITY_DN13429_c0_g1_i5	Purine metabolism, Thiamine metabolism	map00230, map00730	54, 7	ec:3.6.1.15 - phosphatase, ec:4.6.1.2 - cyclase, ec:3.1.4.35 - phosphodiesterase, ec:3.5.4.10 - cyclohydrolase, ec:3.1.5.1 - deoxy-GTPase, ec:3.6.1.9 - diphosphatase, ec:3.5.4.3 - deaminase, ec:3.6.1.17 - (asymmetrical), ec:1.17.4.1 - reductase, ec:3.6.1.3 - adenylpyrophosphatase, ec:3.1.4.17 - phosphodiesterase, ec:4.3.2.2 - lyase, ec:1.7.1.7 - reductase, ec:1.17.1.4 - dehydrogenase, ec:2.7.7.4 …
TRINITY_DN13429_c0_g1_i6	Purine metabolism, Thiamine metabolism	map00230, map00730	54, 7	ec:3.6.1.15 - phosphatase, ec:4.6.1.2 - cyclase, ec:3.1.4.35 - phosphodiesterase, ec:3.5.4.10 - cyclohydrolase, ec:3.1.5.1 - deoxy-GTPase, ec:3.6.1.9 - diphosphatase, ec:3.5.4.3 - deaminase, ec:3.6.1.17 - (asymmetrical), ec:1.17.4.1 - reductase, ec:3.6.1.3 - adenylpyrophosphatase, ec:3.1.4.17 - phosphodiesterase, ec:4.3.2.2 - lyase, ec:1.7.1.7 - reductase, ec:1.17.1.4 - dehydrogenase, ec:2.7.7.4 …
TRINITY_DN13429_c0_g1_i7	Purine metabolism, Thiamine metabolism	map00230, map00730	54, 7	ec:3.6.1.15 - phosphatase, ec:4.6.1.2 - cyclase, ec:3.1.4.35 - phosphodiesterase, ec:3.5.4.10 - cyclohydrolase, ec:3.1.5.1 - deoxy-GTPase, ec:3.6.1.9 - diphosphatase, ec:3.5.4.3 - deaminase, ec:3.6.1.17 - (asymmetrical), ec:1.17.4.1 - reductase, ec:3.6.1.3 - adenylpyrophosphatase, ec:3.1.4.17 - phosphodiesterase, ec:4.3.2.2 - lyase, ec:1.7.1.7 - reductase, ec:1.17.1.4 - dehydrogenase, ec:2.7.7.4 …
TRINITY_DN3035_c0_g2_i9	Purine metabolism, Thiamine metabolism	map00230, map00730	54, 7	ec:3.6.1.15 - phosphatase, ec:4.6.1.2 - cyclase, ec:3.1.4.35 - phosphodiesterase, ec:3.5.4.10 - cyclohydrolase, ec:3.1.5.1 - deoxy-GTPase, ec:3.6.1.9 - diphosphatase, ec:3.5.4.3 - deaminase, ec:3.6.1.17 - (asymmetrical), ec:1.17.4.1 - reductase, ec:3.6.1.3 - adenylpyrophosphatase, ec:3.1.4.17 - phosphodiesterase, ec:4.3.2.2 - lyase, ec:1.7.1.7 - reductase, ec:1.17.1.4 - dehydrogenase, ec:2.7.7.4 …
TRINITY_DN13429_c0_g1_i8	Purine metabolism, Thiamine metabolism	map00230, map00730	54, 7	ec:3.6.1.15 - phosphatase, ec:4.6.1.2 - cyclase, ec:3.1.4.35 - phosphodiesterase, ec:3.5.4.10 - cyclohydrolase, ec:3.1.5.1 - deoxy-GTPase, ec:3.6.1.9 - diphosphatase, ec:3.5.4.3 - deaminase, ec:3.6.1.17 - (asymmetrical), ec:1.17.4.1 - reductase, ec:3.6.1.3 - adenylpyrophosphatase, ec:3.1.4.17 - phosphodiesterase, ec:4.3.2.2 - lyase, ec:1.7.1.7 - reductase, ec:1.17.1.4 - dehydrogenase, ec:2.7.7.4 …
TRINITY_DN227135_c0_g1_i1	Purine metabolism, Thiamine metabolism	map00230, map00730	54, 7	ec:3.6.1.15 - phosphatase, ec:4.6.1.2 - cyclase, ec:3.1.4.35 - phosphodiesterase, ec:3.5.4.10 - cyclohydrolase, ec:3.1.5.1 - deoxy-GTPase, ec:3.6.1.9 - diphosphatase, ec:3.5.4.3 - deaminase, ec:3.6.1.17 - (asymmetrical), ec:1.17.4.1 - reductase, ec:3.6.1.3 - adenylpyrophosphatase, ec:3.1.4.17 - phosphodiesterase, ec:4.3.2.2 - lyase, ec:1.7.1.7 - reductase, ec:1.17.1.4 - dehydrogenase, ec:2.7.7.4 …
TRINITY_DN13429_c0_g1_i9	Purine metabolism, Thiamine metabolism	map00230, map00730	54, 7	ec:3.6.1.15 - phosphatase, ec:4.6.1.2 - cyclase, ec:3.1.4.35 - phosphodiesterase, ec:3.5.4.10 - cyclohydrolase, ec:3.1.5.1 - deoxy-GTPase, ec:3.6.1.9 - diphosphatase, ec:3.5.4.3 - deaminase, ec:3.6.1.17 - (asymmetrical), ec:1.17.4.1 - reductase, ec:3.6.1.3 - adenylpyrophosphatase, ec:3.1.4.17 - phosphodiesterase, ec:4.3.2.2 - lyase, ec:1.7.1.7 - reductase, ec:1.17.1.4 - dehydrogenase, ec:2.7.7.4 …
TRINITY_DN3035_c0_g2_i3	Purine metabolism, Thiamine metabolism	map00230, map00730	54, 7	ec:3.6.1.15 - phosphatase, ec:4.6.1.2 - cyclase, ec:3.1.4.35 - phosphodiesterase, ec:3.5.4.10 - cyclohydrolase, ec:3.1.5.1 - deoxy-GTPase, ec:3.6.1.9 - diphosphatase, ec:3.5.4.3 - deaminase, ec:3.6.1.17 - (asymmetrical), ec:1.17.4.1 - reductase, ec:3.6.1.3 - adenylpyrophosphatase, ec:3.1.4.17 - phosphodiesterase, ec:4.3.2.2 - lyase, ec:1.7.1.7 - reductase, ec:1.17.1.4 - dehydrogenase, ec:2.7.7.4 …
TRINITY_DN56024_c0_g1_i1	Various types of N-glycan biosynthesis, N-Glycan biosynthesis	map00513, map00510	13, 20	ec:2.4.1.38 - beta-1,4-galactosyltransferase, ec:2.4.1.101 - 2-beta-N-acetylglucosaminyltransferase, ec:2.4.1.68 - 6-alpha-L-fucosyltransferase, ec:2.4.1.131 - alpha-1,2-mannosyltransferase, ec:2.4.1.258 - alpha-1,3-mannosyltransferase, ec:2.4.1.141 - N-acetylglucosaminyltransferase, ec:2.4.1.132 - alpha-1,3-mannosyltransferase, ec:2.4.1.143 - 2-beta-N-acetylglucosaminyltransferase, ec:3.2.1.52 -…
TRINITY_DN3035_c0_g2_i4	Purine metabolism, Thiamine metabolism	map00230, map00730	54, 7	ec:3.6.1.15 - phosphatase, ec:4.6.1.2 - cyclase, ec:3.1.4.35 - phosphodiesterase, ec:3.5.4.10 - cyclohydrolase, ec:3.1.5.1 - deoxy-GTPase, ec:3.6.1.9 - diphosphatase, ec:3.5.4.3 - deaminase, ec:3.6.1.17 - (asymmetrical), ec:1.17.4.1 - reductase, ec:3.6.1.3 - adenylpyrophosphatase, ec:3.1.4.17 - phosphodiesterase, ec:4.3.2.2 - lyase, ec:1.7.1.7 - reductase, ec:1.17.1.4 - dehydrogenase, ec:2.7.7.4 …
TRINITY_DN5826_c0_g1_i6	Drug metabolism - other enzymes	map00983	20	ec:2.7.1.48 - kinase, ec:3.5.2.2 - hydantoinase, ec:3.1.1.1 - ali-esterase, ec:1.17.4.1 - reductase, ec:2.4.2.10 - phosphoribosyltransferase, ec:3.2.1.31 - beta-glucuronide glucuronohydrolase glucuronidase, ec:3.6.1.23 - diphosphatase, ec:3.5.4.5 - deaminase, ec:6.3.5.2 - synthase (glutamine-hydrolysing), ec:2.3.1.5 - N-acetyltransferase, ec:2.4.1.17 - 1-naphthol glucuronyltransferase, ec:2.4.2.8…
TRINITY_DN1442_c1_g1_i6	Purine metabolism, Thiamine metabolism	map00230, map00730	54, 7	ec:3.6.1.15 - phosphatase, ec:4.6.1.2 - cyclase, ec:3.1.4.35 - phosphodiesterase, ec:3.5.4.10 - cyclohydrolase, ec:3.1.5.1 - deoxy-GTPase, ec:3.6.1.9 - diphosphatase, ec:3.5.4.3 - deaminase, ec:3.6.1.17 - (asymmetrical), ec:1.17.4.1 - reductase, ec:3.6.1.3 - adenylpyrophosphatase, ec:3.1.4.17 - phosphodiesterase, ec:4.3.2.2 - lyase, ec:1.7.1.7 - reductase, ec:1.17.1.4 - dehydrogenase, ec:2.7.7.4 …
TRINITY_DN6277_c0_g1_i6	Glycerophospholipid metabolism, Phosphatidylinositol signaling system, Ether lipid metabolism, Inositol phosphate metabolism	map00564, map04070, map00565, map00562	30, 24, 13, 25	ec:3.1.4.4 - D, ec:2.7.7.15 - cytidylyltransferase, ec:2.3.1.51 - O-acyltransferase, ec:2.7.8.5 - 1-phosphatidyltransferase, ec:2.3.1.23 - O-acyltransferase, ec:2.3.1.42 - O-acyltransferase, ec:2.7.8.11 - 3-phosphatidyltransferase, ec:2.1.1.17 - N-methyltransferase, ec:1.1.1.8 - dehydrogenase (NAD+), ec:4.1.1.65 - decarboxylase, ec:2.7.8.1 - EPT, ec:2.7.7.41 - cytidylyltransferase, ec:2.7.1.107 -…
TRINITY_DN5826_c0_g1_i4	Drug metabolism - other enzymes	map00983	20	ec:2.7.1.48 - kinase, ec:3.5.2.2 - hydantoinase, ec:3.1.1.1 - ali-esterase, ec:1.17.4.1 - reductase, ec:2.4.2.10 - phosphoribosyltransferase, ec:3.2.1.31 - beta-glucuronide glucuronohydrolase glucuronidase, ec:3.6.1.23 - diphosphatase, ec:3.5.4.5 - deaminase, ec:6.3.5.2 - synthase (glutamine-hydrolysing), ec:2.3.1.5 - N-acetyltransferase, ec:2.4.1.17 - 1-naphthol glucuronyltransferase, ec:2.4.2.8…
TRINITY_DN1442_c1_g1_i8	Purine metabolism, Thiamine metabolism	map00230, map00730	54, 7	ec:3.6.1.15 - phosphatase, ec:4.6.1.2 - cyclase, ec:3.1.4.35 - phosphodiesterase, ec:3.5.4.10 - cyclohydrolase, ec:3.1.5.1 - deoxy-GTPase, ec:3.6.1.9 - diphosphatase, ec:3.5.4.3 - deaminase, ec:3.6.1.17 - (asymmetrical), ec:1.17.4.1 - reductase, ec:3.6.1.3 - adenylpyrophosphatase, ec:3.1.4.17 - phosphodiesterase, ec:4.3.2.2 - lyase, ec:1.7.1.7 - reductase, ec:1.17.1.4 - dehydrogenase, ec:2.7.7.4 …
TRINITY_DN2792_c0_g1_i1	Purine metabolism, Thiamine metabolism	map00230, map00730	54, 7	ec:3.6.1.15 - phosphatase, ec:4.6.1.2 - cyclase, ec:3.1.4.35 - phosphodiesterase, ec:3.5.4.10 - cyclohydrolase, ec:3.1.5.1 - deoxy-GTPase, ec:3.6.1.9 - diphosphatase, ec:3.5.4.3 - deaminase, ec:3.6.1.17 - (asymmetrical), ec:1.17.4.1 - reductase, ec:3.6.1.3 - adenylpyrophosphatase, ec:3.1.4.17 - phosphodiesterase, ec:4.3.2.2 - lyase, ec:1.7.1.7 - reductase, ec:1.17.1.4 - dehydrogenase, ec:2.7.7.4 …
TRINITY_DN1442_c1_g1_i9	Purine metabolism, Thiamine metabolism	map00230, map00730	54, 7	ec:3.6.1.15 - phosphatase, ec:4.6.1.2 - cyclase, ec:3.1.4.35 - phosphodiesterase, ec:3.5.4.10 - cyclohydrolase, ec:3.1.5.1 - deoxy-GTPase, ec:3.6.1.9 - diphosphatase, ec:3.5.4.3 - deaminase, ec:3.6.1.17 - (asymmetrical), ec:1.17.4.1 - reductase, ec:3.6.1.3 - adenylpyrophosphatase, ec:3.1.4.17 - phosphodiesterase, ec:4.3.2.2 - lyase, ec:1.7.1.7 - reductase, ec:1.17.1.4 - dehydrogenase, ec:2.7.7.4 …
TRINITY_DN5826_c0_g1_i8	Drug metabolism - other enzymes	map00983	20	ec:2.7.1.48 - kinase, ec:3.5.2.2 - hydantoinase, ec:3.1.1.1 - ali-esterase, ec:1.17.4.1 - reductase, ec:2.4.2.10 - phosphoribosyltransferase, ec:3.2.1.31 - beta-glucuronide glucuronohydrolase glucuronidase, ec:3.6.1.23 - diphosphatase, ec:3.5.4.5 - deaminase, ec:6.3.5.2 - synthase (glutamine-hydrolysing), ec:2.3.1.5 - N-acetyltransferase, ec:2.4.1.17 - 1-naphthol glucuronyltransferase, ec:2.4.2.8…
TRINITY_DN6277_c0_g1_i4	Glycerophospholipid metabolism, Phosphatidylinositol signaling system, Ether lipid metabolism, Inositol phosphate metabolism	map00564, map04070, map00565, map00562	30, 24, 13, 25	ec:3.1.4.4 - D, ec:2.7.7.15 - cytidylyltransferase, ec:2.3.1.51 - O-acyltransferase, ec:2.7.8.5 - 1-phosphatidyltransferase, ec:2.3.1.23 - O-acyltransferase, ec:2.3.1.42 - O-acyltransferase, ec:2.7.8.11 - 3-phosphatidyltransferase, ec:2.1.1.17 - N-methyltransferase, ec:1.1.1.8 - dehydrogenase (NAD+), ec:4.1.1.65 - decarboxylase, ec:2.7.8.1 - EPT, ec:2.7.7.41 - cytidylyltransferase, ec:2.7.1.107 -…
TRINITY_DN5826_c0_g1_i9	Drug metabolism - other enzymes	map00983	20	ec:2.7.1.48 - kinase, ec:3.5.2.2 - hydantoinase, ec:3.1.1.1 - ali-esterase, ec:1.17.4.1 - reductase, ec:2.4.2.10 - phosphoribosyltransferase, ec:3.2.1.31 - beta-glucuronide glucuronohydrolase glucuronidase, ec:3.6.1.23 - diphosphatase, ec:3.5.4.5 - deaminase, ec:6.3.5.2 - synthase (glutamine-hydrolysing), ec:2.3.1.5 - N-acetyltransferase, ec:2.4.1.17 - 1-naphthol glucuronyltransferase, ec:2.4.2.8…
TRINITY_DN1532_c1_g1_i7	T cell receptor signaling pathway, PD-L1 expression and PD-1 checkpoint pathway in cancer, Th1 and Th2 cell differentiation	map04660, map05235, map04658	2, 1, 1	ec:2.7.10.2 - protein-tyrosine kinase, ec:3.1.3.16 - phosphatase, ec:3.1.3.16 - phosphatase, ec:3.1.3.16 - phosphatase
TRINITY_DN18016_c3_g1_i1	Purine metabolism, Thiamine metabolism	map00230, map00730	54, 7	ec:3.6.1.15 - phosphatase, ec:4.6.1.2 - cyclase, ec:3.1.4.35 - phosphodiesterase, ec:3.5.4.10 - cyclohydrolase, ec:3.1.5.1 - deoxy-GTPase, ec:3.6.1.9 - diphosphatase, ec:3.5.4.3 - deaminase, ec:3.6.1.17 - (asymmetrical), ec:1.17.4.1 - reductase, ec:3.6.1.3 - adenylpyrophosphatase, ec:3.1.4.17 - phosphodiesterase, ec:4.3.2.2 - lyase, ec:1.7.1.7 - reductase, ec:1.17.1.4 - dehydrogenase, ec:2.7.7.4 …
TRINITY_DN11887_c0_g1_i2	Purine metabolism, Thiamine metabolism	map00230, map00730	54, 7	ec:3.6.1.15 - phosphatase, ec:4.6.1.2 - cyclase, ec:3.1.4.35 - phosphodiesterase, ec:3.5.4.10 - cyclohydrolase, ec:3.1.5.1 - deoxy-GTPase, ec:3.6.1.9 - diphosphatase, ec:3.5.4.3 - deaminase, ec:3.6.1.17 - (asymmetrical), ec:1.17.4.1 - reductase, ec:3.6.1.3 - adenylpyrophosphatase, ec:3.1.4.17 - phosphodiesterase, ec:4.3.2.2 - lyase, ec:1.7.1.7 - reductase, ec:1.17.1.4 - dehydrogenase, ec:2.7.7.4 …
TRINITY_DN11887_c0_g1_i1	Purine metabolism, Thiamine metabolism	map00230, map00730	54, 7	ec:3.6.1.15 - phosphatase, ec:4.6.1.2 - cyclase, ec:3.1.4.35 - phosphodiesterase, ec:3.5.4.10 - cyclohydrolase, ec:3.1.5.1 - deoxy-GTPase, ec:3.6.1.9 - diphosphatase, ec:3.5.4.3 - deaminase, ec:3.6.1.17 - (asymmetrical), ec:1.17.4.1 - reductase, ec:3.6.1.3 - adenylpyrophosphatase, ec:3.1.4.17 - phosphodiesterase, ec:4.3.2.2 - lyase, ec:1.7.1.7 - reductase, ec:1.17.1.4 - dehydrogenase, ec:2.7.7.4 …
TRINITY_DN1683_c0_g1_i10	Various types of N-glycan biosynthesis, N-Glycan biosynthesis	map00513, map00510	13, 20	ec:2.4.1.38 - beta-1,4-galactosyltransferase, ec:2.4.1.101 - 2-beta-N-acetylglucosaminyltransferase, ec:2.4.1.68 - 6-alpha-L-fucosyltransferase, ec:2.4.1.131 - alpha-1,2-mannosyltransferase, ec:2.4.1.258 - alpha-1,3-mannosyltransferase, ec:2.4.1.141 - N-acetylglucosaminyltransferase, ec:2.4.1.132 - alpha-1,3-mannosyltransferase, ec:2.4.1.143 - 2-beta-N-acetylglucosaminyltransferase, ec:3.2.1.52 -…
TRINITY_DN11887_c0_g1_i7	Purine metabolism, Thiamine metabolism	map00230, map00730	54, 7	ec:3.6.1.15 - phosphatase, ec:4.6.1.2 - cyclase, ec:3.1.4.35 - phosphodiesterase, ec:3.5.4.10 - cyclohydrolase, ec:3.1.5.1 - deoxy-GTPase, ec:3.6.1.9 - diphosphatase, ec:3.5.4.3 - deaminase, ec:3.6.1.17 - (asymmetrical), ec:1.17.4.1 - reductase, ec:3.6.1.3 - adenylpyrophosphatase, ec:3.1.4.17 - phosphodiesterase, ec:4.3.2.2 - lyase, ec:1.7.1.7 - reductase, ec:1.17.1.4 - dehydrogenase, ec:2.7.7.4 …
TRINITY_DN11887_c0_g1_i4	Purine metabolism, Thiamine metabolism	map00230, map00730	54, 7	ec:3.6.1.15 - phosphatase, ec:4.6.1.2 - cyclase, ec:3.1.4.35 - phosphodiesterase, ec:3.5.4.10 - cyclohydrolase, ec:3.1.5.1 - deoxy-GTPase, ec:3.6.1.9 - diphosphatase, ec:3.5.4.3 - deaminase, ec:3.6.1.17 - (asymmetrical), ec:1.17.4.1 - reductase, ec:3.6.1.3 - adenylpyrophosphatase, ec:3.1.4.17 - phosphodiesterase, ec:4.3.2.2 - lyase, ec:1.7.1.7 - reductase, ec:1.17.1.4 - dehydrogenase, ec:2.7.7.4 …
TRINITY_DN962_c0_g3_i1	Oxidative phosphorylation	map00190	5	ec:3.6.1.1 - diphosphatase, ec:1.3.5.1 - dehydrogenase, ec:7.1.2.1 - H+-exporting transporter, ec:1.6.99.3 - dehydrogenase, ec:7.1.1.2 - reductase (H+-translocating)
TRINITY_DN11887_c0_g1_i5	Purine metabolism, Thiamine metabolism	map00230, map00730	54, 7	ec:3.6.1.15 - phosphatase, ec:4.6.1.2 - cyclase, ec:3.1.4.35 - phosphodiesterase, ec:3.5.4.10 - cyclohydrolase, ec:3.1.5.1 - deoxy-GTPase, ec:3.6.1.9 - diphosphatase, ec:3.5.4.3 - deaminase, ec:3.6.1.17 - (asymmetrical), ec:1.17.4.1 - reductase, ec:3.6.1.3 - adenylpyrophosphatase, ec:3.1.4.17 - phosphodiesterase, ec:4.3.2.2 - lyase, ec:1.7.1.7 - reductase, ec:1.17.1.4 - dehydrogenase, ec:2.7.7.4 …
TRINITY_DN5916_c0_g1_i5	Drug metabolism - other enzymes, Glycerophospholipid metabolism	map00983, map00564	20, 30	ec:2.7.1.48 - kinase, ec:3.5.2.2 - hydantoinase, ec:3.1.1.1 - ali-esterase, ec:1.17.4.1 - reductase, ec:2.4.2.10 - phosphoribosyltransferase, ec:3.2.1.31 - beta-glucuronide glucuronohydrolase glucuronidase, ec:3.6.1.23 - diphosphatase, ec:3.5.4.5 - deaminase, ec:6.3.5.2 - synthase (glutamine-hydrolysing), ec:2.3.1.5 - N-acetyltransferase, ec:2.4.1.17 - 1-naphthol glucuronyltransferase, ec:2.4.2.8…
TRINITY_DN1532_c1_g1_i6	T cell receptor signaling pathway, PD-L1 expression and PD-1 checkpoint pathway in cancer, Th1 and Th2 cell differentiation	map04660, map05235, map04658	2, 1, 1	ec:2.7.10.2 - protein-tyrosine kinase, ec:3.1.3.16 - phosphatase, ec:3.1.3.16 - phosphatase, ec:3.1.3.16 - phosphatase
TRINITY_DN2625_c0_g1_i1	Purine metabolism, Thiamine metabolism	map00230, map00730	54, 7	ec:3.6.1.15 - phosphatase, ec:4.6.1.2 - cyclase, ec:3.1.4.35 - phosphodiesterase, ec:3.5.4.10 - cyclohydrolase, ec:3.1.5.1 - deoxy-GTPase, ec:3.6.1.9 - diphosphatase, ec:3.5.4.3 - deaminase, ec:3.6.1.17 - (asymmetrical), ec:1.17.4.1 - reductase, ec:3.6.1.3 - adenylpyrophosphatase, ec:3.1.4.17 - phosphodiesterase, ec:4.3.2.2 - lyase, ec:1.7.1.7 - reductase, ec:1.17.1.4 - dehydrogenase, ec:2.7.7.4 …
TRINITY_DN149983_c0_g1_i1	Purine metabolism, Thiamine metabolism	map00230, map00730	54, 7	ec:3.6.1.15 - phosphatase, ec:4.6.1.2 - cyclase, ec:3.1.4.35 - phosphodiesterase, ec:3.5.4.10 - cyclohydrolase, ec:3.1.5.1 - deoxy-GTPase, ec:3.6.1.9 - diphosphatase, ec:3.5.4.3 - deaminase, ec:3.6.1.17 - (asymmetrical), ec:1.17.4.1 - reductase, ec:3.6.1.3 - adenylpyrophosphatase, ec:3.1.4.17 - phosphodiesterase, ec:4.3.2.2 - lyase, ec:1.7.1.7 - reductase, ec:1.17.1.4 - dehydrogenase, ec:2.7.7.4 …
TRINITY_DN1532_c1_g1_i3	T cell receptor signaling pathway, PD-L1 expression and PD-1 checkpoint pathway in cancer, Th1 and Th2 cell differentiation	map04660, map05235, map04658	2, 1, 1	ec:2.7.10.2 - protein-tyrosine kinase, ec:3.1.3.16 - phosphatase, ec:3.1.3.16 - phosphatase, ec:3.1.3.16 - phosphatase
TRINITY_DN11887_c0_g1_i8	Purine metabolism, Thiamine metabolism	map00230, map00730	54, 7	ec:3.6.1.15 - phosphatase, ec:4.6.1.2 - cyclase, ec:3.1.4.35 - phosphodiesterase, ec:3.5.4.10 - cyclohydrolase, ec:3.1.5.1 - deoxy-GTPase, ec:3.6.1.9 - diphosphatase, ec:3.5.4.3 - deaminase, ec:3.6.1.17 - (asymmetrical), ec:1.17.4.1 - reductase, ec:3.6.1.3 - adenylpyrophosphatase, ec:3.1.4.17 - phosphodiesterase, ec:4.3.2.2 - lyase, ec:1.7.1.7 - reductase, ec:1.17.1.4 - dehydrogenase, ec:2.7.7.4 …
TRINITY_DN11887_c0_g1_i9	Purine metabolism, Thiamine metabolism	map00230, map00730	54, 7	ec:3.6.1.15 - phosphatase, ec:4.6.1.2 - cyclase, ec:3.1.4.35 - phosphodiesterase, ec:3.5.4.10 - cyclohydrolase, ec:3.1.5.1 - deoxy-GTPase, ec:3.6.1.9 - diphosphatase, ec:3.5.4.3 - deaminase, ec:3.6.1.17 - (asymmetrical), ec:1.17.4.1 - reductase, ec:3.6.1.3 - adenylpyrophosphatase, ec:3.1.4.17 - phosphodiesterase, ec:4.3.2.2 - lyase, ec:1.7.1.7 - reductase, ec:1.17.1.4 - dehydrogenase, ec:2.7.7.4 …
TRINITY_DN185567_c0_g1_i1	T cell receptor signaling pathway, PD-L1 expression and PD-1 checkpoint pathway in cancer, Th1 and Th2 cell differentiation	map04660, map05235, map04658	2, 1, 1	ec:2.7.10.2 - protein-tyrosine kinase, ec:3.1.3.16 - phosphatase, ec:3.1.3.16 - phosphatase, ec:3.1.3.16 - phosphatase
TRINITY_DN5916_c0_g1_i1	Drug metabolism - other enzymes, Glycerophospholipid metabolism	map00983, map00564	20, 30	ec:2.7.1.48 - kinase, ec:3.5.2.2 - hydantoinase, ec:3.1.1.1 - ali-esterase, ec:1.17.4.1 - reductase, ec:2.4.2.10 - phosphoribosyltransferase, ec:3.2.1.31 - beta-glucuronide glucuronohydrolase glucuronidase, ec:3.6.1.23 - diphosphatase, ec:3.5.4.5 - deaminase, ec:6.3.5.2 - synthase (glutamine-hydrolysing), ec:2.3.1.5 - N-acetyltransferase, ec:2.4.1.17 - 1-naphthol glucuronyltransferase, ec:2.4.2.8…
TRINITY_DN1532_c1_g1_i2	T cell receptor signaling pathway, PD-L1 expression and PD-1 checkpoint pathway in cancer, Th1 and Th2 cell differentiation	map04660, map05235, map04658	2, 1, 1	ec:2.7.10.2 - protein-tyrosine kinase, ec:3.1.3.16 - phosphatase, ec:3.1.3.16 - phosphatase, ec:3.1.3.16 - phosphatase
TRINITY_DN5452_c0_g1_i18	Starch and sucrose metabolism	map00500	21	ec:3.2.1.10 - limit dextrinase (erroneous), ec:3.2.1.26 - invertase, ec:3.6.1.9 - diphosphatase, ec:3.2.1.20 - maltase, ec:2.7.7.9 - uridylyltransferase, ec:3.2.1.1 - glycogenase, ec:3.2.1.28 - trehalase, ec:2.7.1.2 - glucokinase (phosphorylating), ec:5.4.2.2 - (alpha-D-glucose-1,6-bisphosphate-dependent), ec:2.4.1.18 - branching enzyme, ec:2.7.1.4 - fructokinase (phosphorylating), ec:5.3.1.9 - i…
TRINITY_DN12568_c0_g1_i1	Purine metabolism, Alanine, aspartate and glutamate metabolism	map00230, map00250	54, 23	ec:3.6.1.15 - phosphatase, ec:4.6.1.2 - cyclase, ec:3.1.4.35 - phosphodiesterase, ec:3.5.4.10 - cyclohydrolase, ec:3.1.5.1 - deoxy-GTPase, ec:3.6.1.9 - diphosphatase, ec:3.5.4.3 - deaminase, ec:3.6.1.17 - (asymmetrical), ec:1.17.4.1 - reductase, ec:3.6.1.3 - adenylpyrophosphatase, ec:3.1.4.17 - phosphodiesterase, ec:4.3.2.2 - lyase, ec:1.7.1.7 - reductase, ec:1.17.1.4 - dehydrogenase, ec:2.7.7.4 …
TRINITY_DN5452_c0_g1_i10	Starch and sucrose metabolism	map00500	21	ec:3.2.1.10 - limit dextrinase (erroneous), ec:3.2.1.26 - invertase, ec:3.6.1.9 - diphosphatase, ec:3.2.1.20 - maltase, ec:2.7.7.9 - uridylyltransferase, ec:3.2.1.1 - glycogenase, ec:3.2.1.28 - trehalase, ec:2.7.1.2 - glucokinase (phosphorylating), ec:5.4.2.2 - (alpha-D-glucose-1,6-bisphosphate-dependent), ec:2.4.1.18 - branching enzyme, ec:2.7.1.4 - fructokinase (phosphorylating), ec:5.3.1.9 - i…
TRINITY_DN5452_c0_g1_i11	Starch and sucrose metabolism	map00500	21	ec:3.2.1.10 - limit dextrinase (erroneous), ec:3.2.1.26 - invertase, ec:3.6.1.9 - diphosphatase, ec:3.2.1.20 - maltase, ec:2.7.7.9 - uridylyltransferase, ec:3.2.1.1 - glycogenase, ec:3.2.1.28 - trehalase, ec:2.7.1.2 - glucokinase (phosphorylating), ec:5.4.2.2 - (alpha-D-glucose-1,6-bisphosphate-dependent), ec:2.4.1.18 - branching enzyme, ec:2.7.1.4 - fructokinase (phosphorylating), ec:5.3.1.9 - i…
TRINITY_DN5452_c0_g1_i12	Starch and sucrose metabolism	map00500	21	ec:3.2.1.10 - limit dextrinase (erroneous), ec:3.2.1.26 - invertase, ec:3.6.1.9 - diphosphatase, ec:3.2.1.20 - maltase, ec:2.7.7.9 - uridylyltransferase, ec:3.2.1.1 - glycogenase, ec:3.2.1.28 - trehalase, ec:2.7.1.2 - glucokinase (phosphorylating), ec:5.4.2.2 - (alpha-D-glucose-1,6-bisphosphate-dependent), ec:2.4.1.18 - branching enzyme, ec:2.7.1.4 - fructokinase (phosphorylating), ec:5.3.1.9 - i…
TRINITY_DN5452_c0_g1_i13	Starch and sucrose metabolism	map00500	21	ec:3.2.1.10 - limit dextrinase (erroneous), ec:3.2.1.26 - invertase, ec:3.6.1.9 - diphosphatase, ec:3.2.1.20 - maltase, ec:2.7.7.9 - uridylyltransferase, ec:3.2.1.1 - glycogenase, ec:3.2.1.28 - trehalase, ec:2.7.1.2 - glucokinase (phosphorylating), ec:5.4.2.2 - (alpha-D-glucose-1,6-bisphosphate-dependent), ec:2.4.1.18 - branching enzyme, ec:2.7.1.4 - fructokinase (phosphorylating), ec:5.3.1.9 - i…
TRINITY_DN5452_c0_g1_i15	Starch and sucrose metabolism	map00500	21	ec:3.2.1.10 - limit dextrinase (erroneous), ec:3.2.1.26 - invertase, ec:3.6.1.9 - diphosphatase, ec:3.2.1.20 - maltase, ec:2.7.7.9 - uridylyltransferase, ec:3.2.1.1 - glycogenase, ec:3.2.1.28 - trehalase, ec:2.7.1.2 - glucokinase (phosphorylating), ec:5.4.2.2 - (alpha-D-glucose-1,6-bisphosphate-dependent), ec:2.4.1.18 - branching enzyme, ec:2.7.1.4 - fructokinase (phosphorylating), ec:5.3.1.9 - i…
TRINITY_DN5452_c0_g1_i16	Starch and sucrose metabolism	map00500	21	ec:3.2.1.10 - limit dextrinase (erroneous), ec:3.2.1.26 - invertase, ec:3.6.1.9 - diphosphatase, ec:3.2.1.20 - maltase, ec:2.7.7.9 - uridylyltransferase, ec:3.2.1.1 - glycogenase, ec:3.2.1.28 - trehalase, ec:2.7.1.2 - glucokinase (phosphorylating), ec:5.4.2.2 - (alpha-D-glucose-1,6-bisphosphate-dependent), ec:2.4.1.18 - branching enzyme, ec:2.7.1.4 - fructokinase (phosphorylating), ec:5.3.1.9 - i…
TRINITY_DN5452_c0_g1_i17	Starch and sucrose metabolism	map00500	21	ec:3.2.1.10 - limit dextrinase (erroneous), ec:3.2.1.26 - invertase, ec:3.6.1.9 - diphosphatase, ec:3.2.1.20 - maltase, ec:2.7.7.9 - uridylyltransferase, ec:3.2.1.1 - glycogenase, ec:3.2.1.28 - trehalase, ec:2.7.1.2 - glucokinase (phosphorylating), ec:5.4.2.2 - (alpha-D-glucose-1,6-bisphosphate-dependent), ec:2.4.1.18 - branching enzyme, ec:2.7.1.4 - fructokinase (phosphorylating), ec:5.3.1.9 - i…
TRINITY_DN103606_c0_g1_i1	Drug metabolism - other enzymes, Nitrotoluene degradation, Caffeine metabolism	map00983, map00633, map00232	20, 1, 3	ec:2.7.1.48 - kinase, ec:3.5.2.2 - hydantoinase, ec:3.1.1.1 - ali-esterase, ec:1.17.4.1 - reductase, ec:2.4.2.10 - phosphoribosyltransferase, ec:3.2.1.31 - beta-glucuronide glucuronohydrolase glucuronidase, ec:3.6.1.23 - diphosphatase, ec:3.5.4.5 - deaminase, ec:6.3.5.2 - synthase (glutamine-hydrolysing), ec:2.3.1.5 - N-acetyltransferase, ec:2.4.1.17 - 1-naphthol glucuronyltransferase, ec:2.4.2.8…
TRINITY_DN19105_c0_g1_i1	Cysteine and methionine metabolism, Pyruvate metabolism, Carbon fixation pathways in prokaryotes, Citrate cycle (TCA cycle), Methane metabolism, Glyoxylate and dicarboxylate metabolism, Carbon fixation in photosynthetic organisms	map00270, map00620, map00720, map00020, map00680, map00630, map00710	28, 24, 21, 17, 13, 18, 15	ec:3.3.1.1 - S-adenosylhomocysteine synthase, ec:2.6.1.3 - transaminase, ec:6.3.2.3 - synthase, ec:1.1.1.37 - dehydrogenase, ec:4.2.1.109 - 1-phosphate dehydratase, ec:4.2.1.22 - beta-synthase, ec:2.5.1.22 - synthase, ec:5.3.2.5 - enolase, ec:4.1.1.50 - decarboxylase, ec:2.4.2.28 - phosphorylase, ec:2.1.1.13 - synthase, ec:2.1.1.5 - S-methyltransferase, ec:4.3.1.17 - ammonia-lyase, ec:2.6.1.1 - t…
TRINITY_DN23_c0_g1_i8	Phosphonate and phosphinate metabolism, Glycerophospholipid metabolism, Ether lipid metabolism	map00440, map00564, map00565	3, 30, 13	ec:2.7.7.15 - cytidylyltransferase, ec:2.7.8.1 - EPT, ec:2.7.8.2 - cholinephosphotransferase, ec:3.1.4.4 - D, ec:2.7.7.15 - cytidylyltransferase, ec:2.3.1.51 - O-acyltransferase, ec:2.7.8.5 - 1-phosphatidyltransferase, ec:2.3.1.23 - O-acyltransferase, ec:2.3.1.42 - O-acyltransferase, ec:2.7.8.11 - 3-phosphatidyltransferase, ec:2.1.1.17 - N-methyltransferase, ec:1.1.1.8 - dehydrogenase (NAD+), ec:…
TRINITY_DN1556_c0_g2_i17	Cutin, suberine and wax biosynthesis, Glycerolipid metabolism	map00073, map00561	3, 19	ec:2.3.1.20 - O-acyltransferase, ec:1.2.1.50 - acyl-protein thioester reductase, ec:1.2.1.84 - fatty acyl-CoA reductase, ec:2.3.1.20 - O-acyltransferase, ec:1.2.1.3 - dehydrogenase (NAD+), ec:2.7.1.31 - 3-kinase, ec:2.3.1.51 - O-acyltransferase, ec:2.7.7.9 - uridylyltransferase, ec:3.1.3.21 - alpha-glycerophosphatase, ec:1.1.1.21 - reductase, ec:1.1.1.2 - dehydrogenase (NADP+), ec:3.1.1.3 - lipas…
TRINITY_DN105891_c0_g1_i1	Glycine, serine and threonine metabolism, Arginine and proline metabolism	map00260, map00330	30, 21	ec:1.2.1.8 - dehydrogenase, ec:1.4.4.2 - dehydrogenase (aminomethyl-transferring), ec:2.3.1.37 - synthase, ec:2.7.1.31 - 3-kinase, ec:4.1.2.5 - aldolase, ec:2.1.1.20 - N-methyltransferase, ec:1.8.1.4 - dehydrogenase, ec:2.1.1.156 - N-methyltransferase, ec:1.5.8.4 - dehydrogenase, ec:1.4.3.21 - oxidase, ec:4.2.1.22 - beta-synthase, ec:1.4.3.3 - oxidase, ec:2.1.2.1 - hydroxymethyltransferase, ec:1.…
TRINITY_DN25362_c0_g1_i1	Purine metabolism, Thiamine metabolism	map00230, map00730	54, 7	ec:3.6.1.15 - phosphatase, ec:4.6.1.2 - cyclase, ec:3.1.4.35 - phosphodiesterase, ec:3.5.4.10 - cyclohydrolase, ec:3.1.5.1 - deoxy-GTPase, ec:3.6.1.9 - diphosphatase, ec:3.5.4.3 - deaminase, ec:3.6.1.17 - (asymmetrical), ec:1.17.4.1 - reductase, ec:3.6.1.3 - adenylpyrophosphatase, ec:3.1.4.17 - phosphodiesterase, ec:4.3.2.2 - lyase, ec:1.7.1.7 - reductase, ec:1.17.1.4 - dehydrogenase, ec:2.7.7.4 …
TRINITY_DN1556_c0_g2_i18	Cutin, suberine and wax biosynthesis, Glycerolipid metabolism	map00073, map00561	3, 19	ec:2.3.1.20 - O-acyltransferase, ec:1.2.1.50 - acyl-protein thioester reductase, ec:1.2.1.84 - fatty acyl-CoA reductase, ec:2.3.1.20 - O-acyltransferase, ec:1.2.1.3 - dehydrogenase (NAD+), ec:2.7.1.31 - 3-kinase, ec:2.3.1.51 - O-acyltransferase, ec:2.7.7.9 - uridylyltransferase, ec:3.1.3.21 - alpha-glycerophosphatase, ec:1.1.1.21 - reductase, ec:1.1.1.2 - dehydrogenase (NADP+), ec:3.1.1.3 - lipas…
TRINITY_DN33433_c0_g1_i3	T cell receptor signaling pathway, PD-L1 expression and PD-1 checkpoint pathway in cancer, Th1 and Th2 cell differentiation	map04660, map05235, map04658	2, 1, 1	ec:2.7.10.2 - protein-tyrosine kinase, ec:3.1.3.16 - phosphatase, ec:3.1.3.16 - phosphatase, ec:3.1.3.16 - phosphatase
TRINITY_DN8745_c1_g1_i10	Retinol metabolism	map00830	6	ec:2.3.1.76 - O-fatty-acyltransferase, ec:1.2.1.36 - dehydrogenase, ec:2.4.1.17 - 1-naphthol glucuronyltransferase, ec:1.1.1.105 - dehydrogenase (NAD+), ec:1.3.99.23 - 13,14-reductase, ec:1.1.1.1 - dehydrogenase
TRINITY_DN8745_c1_g1_i11	Retinol metabolism	map00830	6	ec:2.3.1.76 - O-fatty-acyltransferase, ec:1.2.1.36 - dehydrogenase, ec:2.4.1.17 - 1-naphthol glucuronyltransferase, ec:1.1.1.105 - dehydrogenase (NAD+), ec:1.3.99.23 - 13,14-reductase, ec:1.1.1.1 - dehydrogenase
TRINITY_DN8745_c1_g1_i12	Retinol metabolism	map00830	6	ec:2.3.1.76 - O-fatty-acyltransferase, ec:1.2.1.36 - dehydrogenase, ec:2.4.1.17 - 1-naphthol glucuronyltransferase, ec:1.1.1.105 - dehydrogenase (NAD+), ec:1.3.99.23 - 13,14-reductase, ec:1.1.1.1 - dehydrogenase
TRINITY_DN147553_c0_g1_i1	Drug metabolism - other enzymes, Nitrotoluene degradation, Caffeine metabolism	map00983, map00633, map00232	20, 1, 3	ec:2.7.1.48 - kinase, ec:3.5.2.2 - hydantoinase, ec:3.1.1.1 - ali-esterase, ec:1.17.4.1 - reductase, ec:2.4.2.10 - phosphoribosyltransferase, ec:3.2.1.31 - beta-glucuronide glucuronohydrolase glucuronidase, ec:3.6.1.23 - diphosphatase, ec:3.5.4.5 - deaminase, ec:6.3.5.2 - synthase (glutamine-hydrolysing), ec:2.3.1.5 - N-acetyltransferase, ec:2.4.1.17 - 1-naphthol glucuronyltransferase, ec:2.4.2.8…
TRINITY_DN99884_c0_g1_i1	T cell receptor signaling pathway, PD-L1 expression and PD-1 checkpoint pathway in cancer, Th1 and Th2 cell differentiation	map04660, map05235, map04658	2, 1, 1	ec:2.7.10.2 - protein-tyrosine kinase, ec:3.1.3.16 - phosphatase, ec:3.1.3.16 - phosphatase, ec:3.1.3.16 - phosphatase
TRINITY_DN2751_c0_g2_i5	Purine metabolism, Thiamine metabolism	map00230, map00730	54, 7	ec:3.6.1.15 - phosphatase, ec:4.6.1.2 - cyclase, ec:3.1.4.35 - phosphodiesterase, ec:3.5.4.10 - cyclohydrolase, ec:3.1.5.1 - deoxy-GTPase, ec:3.6.1.9 - diphosphatase, ec:3.5.4.3 - deaminase, ec:3.6.1.17 - (asymmetrical), ec:1.17.4.1 - reductase, ec:3.6.1.3 - adenylpyrophosphatase, ec:3.1.4.17 - phosphodiesterase, ec:4.3.2.2 - lyase, ec:1.7.1.7 - reductase, ec:1.17.1.4 - dehydrogenase, ec:2.7.7.4 …
TRINITY_DN1556_c0_g2_i13	Cutin, suberine and wax biosynthesis, Glycerolipid metabolism	map00073, map00561	3, 19	ec:2.3.1.20 - O-acyltransferase, ec:1.2.1.50 - acyl-protein thioester reductase, ec:1.2.1.84 - fatty acyl-CoA reductase, ec:2.3.1.20 - O-acyltransferase, ec:1.2.1.3 - dehydrogenase (NAD+), ec:2.7.1.31 - 3-kinase, ec:2.3.1.51 - O-acyltransferase, ec:2.7.7.9 - uridylyltransferase, ec:3.1.3.21 - alpha-glycerophosphatase, ec:1.1.1.21 - reductase, ec:1.1.1.2 - dehydrogenase (NADP+), ec:3.1.1.3 - lipas…
TRINITY_DN2751_c0_g2_i6	Purine metabolism, Thiamine metabolism	map00230, map00730	54, 7	ec:3.6.1.15 - phosphatase, ec:4.6.1.2 - cyclase, ec:3.1.4.35 - phosphodiesterase, ec:3.5.4.10 - cyclohydrolase, ec:3.1.5.1 - deoxy-GTPase, ec:3.6.1.9 - diphosphatase, ec:3.5.4.3 - deaminase, ec:3.6.1.17 - (asymmetrical), ec:1.17.4.1 - reductase, ec:3.6.1.3 - adenylpyrophosphatase, ec:3.1.4.17 - phosphodiesterase, ec:4.3.2.2 - lyase, ec:1.7.1.7 - reductase, ec:1.17.1.4 - dehydrogenase, ec:2.7.7.4 …
TRINITY_DN1556_c0_g2_i12	Cutin, suberine and wax biosynthesis, Glycerolipid metabolism	map00073, map00561	3, 19	ec:2.3.1.20 - O-acyltransferase, ec:1.2.1.50 - acyl-protein thioester reductase, ec:1.2.1.84 - fatty acyl-CoA reductase, ec:2.3.1.20 - O-acyltransferase, ec:1.2.1.3 - dehydrogenase (NAD+), ec:2.7.1.31 - 3-kinase, ec:2.3.1.51 - O-acyltransferase, ec:2.7.7.9 - uridylyltransferase, ec:3.1.3.21 - alpha-glycerophosphatase, ec:1.1.1.21 - reductase, ec:1.1.1.2 - dehydrogenase (NADP+), ec:3.1.1.3 - lipas…
TRINITY_DN116856_c0_g1_i3	Purine metabolism, Thiamine metabolism	map00230, map00730	54, 7	ec:3.6.1.15 - phosphatase, ec:4.6.1.2 - cyclase, ec:3.1.4.35 - phosphodiesterase, ec:3.5.4.10 - cyclohydrolase, ec:3.1.5.1 - deoxy-GTPase, ec:3.6.1.9 - diphosphatase, ec:3.5.4.3 - deaminase, ec:3.6.1.17 - (asymmetrical), ec:1.17.4.1 - reductase, ec:3.6.1.3 - adenylpyrophosphatase, ec:3.1.4.17 - phosphodiesterase, ec:4.3.2.2 - lyase, ec:1.7.1.7 - reductase, ec:1.17.1.4 - dehydrogenase, ec:2.7.7.4 …
TRINITY_DN2751_c0_g2_i3	Purine metabolism, Thiamine metabolism	map00230, map00730	54, 7	ec:3.6.1.15 - phosphatase, ec:4.6.1.2 - cyclase, ec:3.1.4.35 - phosphodiesterase, ec:3.5.4.10 - cyclohydrolase, ec:3.1.5.1 - deoxy-GTPase, ec:3.6.1.9 - diphosphatase, ec:3.5.4.3 - deaminase, ec:3.6.1.17 - (asymmetrical), ec:1.17.4.1 - reductase, ec:3.6.1.3 - adenylpyrophosphatase, ec:3.1.4.17 - phosphodiesterase, ec:4.3.2.2 - lyase, ec:1.7.1.7 - reductase, ec:1.17.1.4 - dehydrogenase, ec:2.7.7.4 …
TRINITY_DN1556_c0_g2_i15	Cutin, suberine and wax biosynthesis, Glycerolipid metabolism	map00073, map00561	3, 19	ec:2.3.1.20 - O-acyltransferase, ec:1.2.1.50 - acyl-protein thioester reductase, ec:1.2.1.84 - fatty acyl-CoA reductase, ec:2.3.1.20 - O-acyltransferase, ec:1.2.1.3 - dehydrogenase (NAD+), ec:2.7.1.31 - 3-kinase, ec:2.3.1.51 - O-acyltransferase, ec:2.7.7.9 - uridylyltransferase, ec:3.1.3.21 - alpha-glycerophosphatase, ec:1.1.1.21 - reductase, ec:1.1.1.2 - dehydrogenase (NADP+), ec:3.1.1.3 - lipas…
TRINITY_DN116856_c0_g1_i2	Purine metabolism, Thiamine metabolism	map00230, map00730	54, 7	ec:3.6.1.15 - phosphatase, ec:4.6.1.2 - cyclase, ec:3.1.4.35 - phosphodiesterase, ec:3.5.4.10 - cyclohydrolase, ec:3.1.5.1 - deoxy-GTPase, ec:3.6.1.9 - diphosphatase, ec:3.5.4.3 - deaminase, ec:3.6.1.17 - (asymmetrical), ec:1.17.4.1 - reductase, ec:3.6.1.3 - adenylpyrophosphatase, ec:3.1.4.17 - phosphodiesterase, ec:4.3.2.2 - lyase, ec:1.7.1.7 - reductase, ec:1.17.1.4 - dehydrogenase, ec:2.7.7.4 …
TRINITY_DN41232_c0_g1_i3	T cell receptor signaling pathway	map04660	2	ec:2.7.10.2 - protein-tyrosine kinase, ec:3.1.3.16 - phosphatase
TRINITY_DN2751_c0_g2_i2	Purine metabolism, Thiamine metabolism	map00230, map00730	54, 7	ec:3.6.1.15 - phosphatase, ec:4.6.1.2 - cyclase, ec:3.1.4.35 - phosphodiesterase, ec:3.5.4.10 - cyclohydrolase, ec:3.1.5.1 - deoxy-GTPase, ec:3.6.1.9 - diphosphatase, ec:3.5.4.3 - deaminase, ec:3.6.1.17 - (asymmetrical), ec:1.17.4.1 - reductase, ec:3.6.1.3 - adenylpyrophosphatase, ec:3.1.4.17 - phosphodiesterase, ec:4.3.2.2 - lyase, ec:1.7.1.7 - reductase, ec:1.17.1.4 - dehydrogenase, ec:2.7.7.4 …
TRINITY_DN15519_c1_g5_i2	Purine metabolism, Thiamine metabolism	map00230, map00730	54, 7	ec:3.6.1.15 - phosphatase, ec:4.6.1.2 - cyclase, ec:3.1.4.35 - phosphodiesterase, ec:3.5.4.10 - cyclohydrolase, ec:3.1.5.1 - deoxy-GTPase, ec:3.6.1.9 - diphosphatase, ec:3.5.4.3 - deaminase, ec:3.6.1.17 - (asymmetrical), ec:1.17.4.1 - reductase, ec:3.6.1.3 - adenylpyrophosphatase, ec:3.1.4.17 - phosphodiesterase, ec:4.3.2.2 - lyase, ec:1.7.1.7 - reductase, ec:1.17.1.4 - dehydrogenase, ec:2.7.7.4 …
TRINITY_DN1556_c0_g2_i11	Cutin, suberine and wax biosynthesis, Glycerolipid metabolism	map00073, map00561	3, 19	ec:2.3.1.20 - O-acyltransferase, ec:1.2.1.50 - acyl-protein thioester reductase, ec:1.2.1.84 - fatty acyl-CoA reductase, ec:2.3.1.20 - O-acyltransferase, ec:1.2.1.3 - dehydrogenase (NAD+), ec:2.7.1.31 - 3-kinase, ec:2.3.1.51 - O-acyltransferase, ec:2.7.7.9 - uridylyltransferase, ec:3.1.3.21 - alpha-glycerophosphatase, ec:1.1.1.21 - reductase, ec:1.1.1.2 - dehydrogenase (NADP+), ec:3.1.1.3 - lipas…
TRINITY_DN15519_c1_g5_i1	Purine metabolism, Thiamine metabolism	map00230, map00730	54, 7	ec:3.6.1.15 - phosphatase, ec:4.6.1.2 - cyclase, ec:3.1.4.35 - phosphodiesterase, ec:3.5.4.10 - cyclohydrolase, ec:3.1.5.1 - deoxy-GTPase, ec:3.6.1.9 - diphosphatase, ec:3.5.4.3 - deaminase, ec:3.6.1.17 - (asymmetrical), ec:1.17.4.1 - reductase, ec:3.6.1.3 - adenylpyrophosphatase, ec:3.1.4.17 - phosphodiesterase, ec:4.3.2.2 - lyase, ec:1.7.1.7 - reductase, ec:1.17.1.4 - dehydrogenase, ec:2.7.7.4 …
TRINITY_DN1556_c0_g2_i10	Cutin, suberine and wax biosynthesis, Glycerolipid metabolism	map00073, map00561	3, 19	ec:2.3.1.20 - O-acyltransferase, ec:1.2.1.50 - acyl-protein thioester reductase, ec:1.2.1.84 - fatty acyl-CoA reductase, ec:2.3.1.20 - O-acyltransferase, ec:1.2.1.3 - dehydrogenase (NAD+), ec:2.7.1.31 - 3-kinase, ec:2.3.1.51 - O-acyltransferase, ec:2.7.7.9 - uridylyltransferase, ec:3.1.3.21 - alpha-glycerophosphatase, ec:1.1.1.21 - reductase, ec:1.1.1.2 - dehydrogenase (NADP+), ec:3.1.1.3 - lipas…
TRINITY_DN18694_c0_g2_i1	Primary bile acid biosynthesis	map00120	6	ec:1.1.1.181 - 3beta-dehydrogenase, ec:1.17.99.3 - 24-hydroxylase, ec:2.3.1.176 - C-acyltransferase, ec:1.14.14.23 - 7alpha-monooxygenase, ec:1.14.14.25 - 24-hydroxylase, ec:2.3.1.65 - acid-CoA:amino acid N-acyltransferase
TRINITY_DN1442_c1_g1_i10	Purine metabolism, Thiamine metabolism	map00230, map00730	54, 7	ec:3.6.1.15 - phosphatase, ec:4.6.1.2 - cyclase, ec:3.1.4.35 - phosphodiesterase, ec:3.5.4.10 - cyclohydrolase, ec:3.1.5.1 - deoxy-GTPase, ec:3.6.1.9 - diphosphatase, ec:3.5.4.3 - deaminase, ec:3.6.1.17 - (asymmetrical), ec:1.17.4.1 - reductase, ec:3.6.1.3 - adenylpyrophosphatase, ec:3.1.4.17 - phosphodiesterase, ec:4.3.2.2 - lyase, ec:1.7.1.7 - reductase, ec:1.17.1.4 - dehydrogenase, ec:2.7.7.4 …
TRINITY_DN1442_c1_g1_i11	Purine metabolism, Thiamine metabolism	map00230, map00730	54, 7	ec:3.6.1.15 - phosphatase, ec:4.6.1.2 - cyclase, ec:3.1.4.35 - phosphodiesterase, ec:3.5.4.10 - cyclohydrolase, ec:3.1.5.1 - deoxy-GTPase, ec:3.6.1.9 - diphosphatase, ec:3.5.4.3 - deaminase, ec:3.6.1.17 - (asymmetrical), ec:1.17.4.1 - reductase, ec:3.6.1.3 - adenylpyrophosphatase, ec:3.1.4.17 - phosphodiesterase, ec:4.3.2.2 - lyase, ec:1.7.1.7 - reductase, ec:1.17.1.4 - dehydrogenase, ec:2.7.7.4 …
TRINITY_DN4929_c0_g1_i20	Porphyrin and chlorophyll metabolism	map00860	19	ec:4.99.1.1 - ferrochelatase, ec:2.3.1.37 - synthase, ec:4.2.1.75 - synthase, ec:1.3.1.24 - reductase, ec:1.14.14.18 - oxygenase (biliverdin-producing), ec:2.5.1.17 - adenosyltransferase, ec:1.3.3.4 - oxidase, ec:1.3.3.3 - oxidase, ec:3.2.1.31 - beta-glucuronide glucuronohydrolase glucuronidase, ec:2.5.1.61 - synthase, ec:4.1.1.37 - decarboxylase, ec:2.4.1.17 - 1-naphthol glucuronyltransferase, e…
TRINITY_DN3745_c1_g1_i3	Fatty acid elongation	map00062	12	ec:2.3.1.199 - 3-oxoacyl-CoA synthase, ec:1.3.1.38 - reductase (NADPH), ec:1.1.1.35 - dehydrogenase, ec:1.1.1.330 - 3-oxoacyl-CoA reductase, ec:1.3.1.93 - enoyl-CoA reductase, ec:4.2.1.134 - (3R)-3-hydroxyacyl-CoA dehydratase, ec:2.3.1.16 - C-acyltransferase, ec:1.1.1.211 - dehydrogenase, ec:4.2.1.74 - hydratase, ec:4.2.1.17 - hydratase, ec:3.1.2.22 - hydrolase, ec:3.1.2.2 - hydrolase
TRINITY_DN223830_c0_g1_i1	T cell receptor signaling pathway	map04660	2	ec:2.7.10.2 - protein-tyrosine kinase, ec:3.1.3.16 - phosphatase
TRINITY_DN3745_c1_g1_i8	Fatty acid elongation	map00062	12	ec:2.3.1.199 - 3-oxoacyl-CoA synthase, ec:1.3.1.38 - reductase (NADPH), ec:1.1.1.35 - dehydrogenase, ec:1.1.1.330 - 3-oxoacyl-CoA reductase, ec:1.3.1.93 - enoyl-CoA reductase, ec:4.2.1.134 - (3R)-3-hydroxyacyl-CoA dehydratase, ec:2.3.1.16 - C-acyltransferase, ec:1.1.1.211 - dehydrogenase, ec:4.2.1.74 - hydratase, ec:4.2.1.17 - hydratase, ec:3.1.2.22 - hydrolase, ec:3.1.2.2 - hydrolase
TRINITY_DN3745_c1_g1_i9	Fatty acid elongation	map00062	12	ec:2.3.1.199 - 3-oxoacyl-CoA synthase, ec:1.3.1.38 - reductase (NADPH), ec:1.1.1.35 - dehydrogenase, ec:1.1.1.330 - 3-oxoacyl-CoA reductase, ec:1.3.1.93 - enoyl-CoA reductase, ec:4.2.1.134 - (3R)-3-hydroxyacyl-CoA dehydratase, ec:2.3.1.16 - C-acyltransferase, ec:1.1.1.211 - dehydrogenase, ec:4.2.1.74 - hydratase, ec:4.2.1.17 - hydratase, ec:3.1.2.22 - hydrolase, ec:3.1.2.2 - hydrolase
TRINITY_DN20814_c0_g1_i4	Oxidative phosphorylation	map00190	5	ec:3.6.1.1 - diphosphatase, ec:1.3.5.1 - dehydrogenase, ec:7.1.2.1 - H+-exporting transporter, ec:1.6.99.3 - dehydrogenase, ec:7.1.1.2 - reductase (H+-translocating)
TRINITY_DN20814_c0_g1_i2	Oxidative phosphorylation	map00190	5	ec:3.6.1.1 - diphosphatase, ec:1.3.5.1 - dehydrogenase, ec:7.1.2.1 - H+-exporting transporter, ec:1.6.99.3 - dehydrogenase, ec:7.1.1.2 - reductase (H+-translocating)
TRINITY_DN4929_c0_g1_i21	Porphyrin and chlorophyll metabolism	map00860	19	ec:4.99.1.1 - ferrochelatase, ec:2.3.1.37 - synthase, ec:4.2.1.75 - synthase, ec:1.3.1.24 - reductase, ec:1.14.14.18 - oxygenase (biliverdin-producing), ec:2.5.1.17 - adenosyltransferase, ec:1.3.3.4 - oxidase, ec:1.3.3.3 - oxidase, ec:3.2.1.31 - beta-glucuronide glucuronohydrolase glucuronidase, ec:2.5.1.61 - synthase, ec:4.1.1.37 - decarboxylase, ec:2.4.1.17 - 1-naphthol glucuronyltransferase, e…
TRINITY_DN122712_c0_g1_i1	Purine metabolism	map00230	54	ec:3.6.1.15 - phosphatase, ec:4.6.1.2 - cyclase, ec:3.1.4.35 - phosphodiesterase, ec:3.5.4.10 - cyclohydrolase, ec:3.1.5.1 - deoxy-GTPase, ec:3.6.1.9 - diphosphatase, ec:3.5.4.3 - deaminase, ec:3.6.1.17 - (asymmetrical), ec:1.17.4.1 - reductase, ec:3.6.1.3 - adenylpyrophosphatase, ec:3.1.4.17 - phosphodiesterase, ec:4.3.2.2 - lyase, ec:1.7.1.7 - reductase, ec:1.17.1.4 - dehydrogenase, ec:2.7.7.4 …
TRINITY_DN9875_c0_g1_i1	T cell receptor signaling pathway, PD-L1 expression and PD-1 checkpoint pathway in cancer, Th1 and Th2 cell differentiation	map04660, map05235, map04658	2, 1, 1	ec:2.7.10.2 - protein-tyrosine kinase, ec:3.1.3.16 - phosphatase, ec:3.1.3.16 - phosphatase, ec:3.1.3.16 - phosphatase
TRINITY_DN7679_c0_g1_i1	Purine metabolism, Thiamine metabolism	map00230, map00730	54, 7	ec:3.6.1.15 - phosphatase, ec:4.6.1.2 - cyclase, ec:3.1.4.35 - phosphodiesterase, ec:3.5.4.10 - cyclohydrolase, ec:3.1.5.1 - deoxy-GTPase, ec:3.6.1.9 - diphosphatase, ec:3.5.4.3 - deaminase, ec:3.6.1.17 - (asymmetrical), ec:1.17.4.1 - reductase, ec:3.6.1.3 - adenylpyrophosphatase, ec:3.1.4.17 - phosphodiesterase, ec:4.3.2.2 - lyase, ec:1.7.1.7 - reductase, ec:1.17.1.4 - dehydrogenase, ec:2.7.7.4 …
TRINITY_DN4426_c1_g1_i2	Oxidative phosphorylation	map00190	5	ec:3.6.1.1 - diphosphatase, ec:1.3.5.1 - dehydrogenase, ec:7.1.2.1 - H+-exporting transporter, ec:1.6.99.3 - dehydrogenase, ec:7.1.1.2 - reductase (H+-translocating)
TRINITY_DN223290_c0_g1_i1	T cell receptor signaling pathway, PD-L1 expression and PD-1 checkpoint pathway in cancer, Th1 and Th2 cell differentiation	map04660, map05235, map04658	2, 1, 1	ec:2.7.10.2 - protein-tyrosine kinase, ec:3.1.3.16 - phosphatase, ec:3.1.3.16 - phosphatase, ec:3.1.3.16 - phosphatase
TRINITY_DN7679_c0_g1_i2	Purine metabolism, Thiamine metabolism	map00230, map00730	54, 7	ec:3.6.1.15 - phosphatase, ec:4.6.1.2 - cyclase, ec:3.1.4.35 - phosphodiesterase, ec:3.5.4.10 - cyclohydrolase, ec:3.1.5.1 - deoxy-GTPase, ec:3.6.1.9 - diphosphatase, ec:3.5.4.3 - deaminase, ec:3.6.1.17 - (asymmetrical), ec:1.17.4.1 - reductase, ec:3.6.1.3 - adenylpyrophosphatase, ec:3.1.4.17 - phosphodiesterase, ec:4.3.2.2 - lyase, ec:1.7.1.7 - reductase, ec:1.17.1.4 - dehydrogenase, ec:2.7.7.4 …
TRINITY_DN7679_c0_g1_i3	Purine metabolism, Thiamine metabolism	map00230, map00730	54, 7	ec:3.6.1.15 - phosphatase, ec:4.6.1.2 - cyclase, ec:3.1.4.35 - phosphodiesterase, ec:3.5.4.10 - cyclohydrolase, ec:3.1.5.1 - deoxy-GTPase, ec:3.6.1.9 - diphosphatase, ec:3.5.4.3 - deaminase, ec:3.6.1.17 - (asymmetrical), ec:1.17.4.1 - reductase, ec:3.6.1.3 - adenylpyrophosphatase, ec:3.1.4.17 - phosphodiesterase, ec:4.3.2.2 - lyase, ec:1.7.1.7 - reductase, ec:1.17.1.4 - dehydrogenase, ec:2.7.7.4 …
TRINITY_DN288030_c0_g1_i1	Purine metabolism, Thiamine metabolism	map00230, map00730	54, 7	ec:3.6.1.15 - phosphatase, ec:4.6.1.2 - cyclase, ec:3.1.4.35 - phosphodiesterase, ec:3.5.4.10 - cyclohydrolase, ec:3.1.5.1 - deoxy-GTPase, ec:3.6.1.9 - diphosphatase, ec:3.5.4.3 - deaminase, ec:3.6.1.17 - (asymmetrical), ec:1.17.4.1 - reductase, ec:3.6.1.3 - adenylpyrophosphatase, ec:3.1.4.17 - phosphodiesterase, ec:4.3.2.2 - lyase, ec:1.7.1.7 - reductase, ec:1.17.1.4 - dehydrogenase, ec:2.7.7.4 …
TRINITY_DN7679_c0_g1_i4	Purine metabolism, Thiamine metabolism	map00230, map00730	54, 7	ec:3.6.1.15 - phosphatase, ec:4.6.1.2 - cyclase, ec:3.1.4.35 - phosphodiesterase, ec:3.5.4.10 - cyclohydrolase, ec:3.1.5.1 - deoxy-GTPase, ec:3.6.1.9 - diphosphatase, ec:3.5.4.3 - deaminase, ec:3.6.1.17 - (asymmetrical), ec:1.17.4.1 - reductase, ec:3.6.1.3 - adenylpyrophosphatase, ec:3.1.4.17 - phosphodiesterase, ec:4.3.2.2 - lyase, ec:1.7.1.7 - reductase, ec:1.17.1.4 - dehydrogenase, ec:2.7.7.4 …
TRINITY_DN4929_c0_g1_i14	Porphyrin and chlorophyll metabolism	map00860	19	ec:4.99.1.1 - ferrochelatase, ec:2.3.1.37 - synthase, ec:4.2.1.75 - synthase, ec:1.3.1.24 - reductase, ec:1.14.14.18 - oxygenase (biliverdin-producing), ec:2.5.1.17 - adenosyltransferase, ec:1.3.3.4 - oxidase, ec:1.3.3.3 - oxidase, ec:3.2.1.31 - beta-glucuronide glucuronohydrolase glucuronidase, ec:2.5.1.61 - synthase, ec:4.1.1.37 - decarboxylase, ec:2.4.1.17 - 1-naphthol glucuronyltransferase, e…
TRINITY_DN4929_c0_g1_i17	Porphyrin and chlorophyll metabolism	map00860	19	ec:4.99.1.1 - ferrochelatase, ec:2.3.1.37 - synthase, ec:4.2.1.75 - synthase, ec:1.3.1.24 - reductase, ec:1.14.14.18 - oxygenase (biliverdin-producing), ec:2.5.1.17 - adenosyltransferase, ec:1.3.3.4 - oxidase, ec:1.3.3.3 - oxidase, ec:3.2.1.31 - beta-glucuronide glucuronohydrolase glucuronidase, ec:2.5.1.61 - synthase, ec:4.1.1.37 - decarboxylase, ec:2.4.1.17 - 1-naphthol glucuronyltransferase, e…
TRINITY_DN1549_c1_g1_i2	Various types of N-glycan biosynthesis, N-Glycan biosynthesis, Other glycan degradation	map00513, map00510, map00511	13, 20, 9	ec:2.4.1.38 - beta-1,4-galactosyltransferase, ec:2.4.1.101 - 2-beta-N-acetylglucosaminyltransferase, ec:2.4.1.68 - 6-alpha-L-fucosyltransferase, ec:2.4.1.131 - alpha-1,2-mannosyltransferase, ec:2.4.1.258 - alpha-1,3-mannosyltransferase, ec:2.4.1.141 - N-acetylglucosaminyltransferase, ec:2.4.1.132 - alpha-1,3-mannosyltransferase, ec:2.4.1.143 - 2-beta-N-acetylglucosaminyltransferase, ec:3.2.1.52 -…
TRINITY_DN7649_c0_g5_i1	Purine metabolism, Thiamine metabolism	map00230, map00730	54, 7	ec:3.6.1.15 - phosphatase, ec:4.6.1.2 - cyclase, ec:3.1.4.35 - phosphodiesterase, ec:3.5.4.10 - cyclohydrolase, ec:3.1.5.1 - deoxy-GTPase, ec:3.6.1.9 - diphosphatase, ec:3.5.4.3 - deaminase, ec:3.6.1.17 - (asymmetrical), ec:1.17.4.1 - reductase, ec:3.6.1.3 - adenylpyrophosphatase, ec:3.1.4.17 - phosphodiesterase, ec:4.3.2.2 - lyase, ec:1.7.1.7 - reductase, ec:1.17.1.4 - dehydrogenase, ec:2.7.7.4 …
TRINITY_DN1549_c1_g1_i4	Various types of N-glycan biosynthesis, N-Glycan biosynthesis, Other glycan degradation	map00513, map00510, map00511	13, 20, 9	ec:2.4.1.38 - beta-1,4-galactosyltransferase, ec:2.4.1.101 - 2-beta-N-acetylglucosaminyltransferase, ec:2.4.1.68 - 6-alpha-L-fucosyltransferase, ec:2.4.1.131 - alpha-1,2-mannosyltransferase, ec:2.4.1.258 - alpha-1,3-mannosyltransferase, ec:2.4.1.141 - N-acetylglucosaminyltransferase, ec:2.4.1.132 - alpha-1,3-mannosyltransferase, ec:2.4.1.143 - 2-beta-N-acetylglucosaminyltransferase, ec:3.2.1.52 -…
TRINITY_DN1549_c1_g1_i3	Various types of N-glycan biosynthesis, N-Glycan biosynthesis, Other glycan degradation	map00513, map00510, map00511	13, 20, 9	ec:2.4.1.38 - beta-1,4-galactosyltransferase, ec:2.4.1.101 - 2-beta-N-acetylglucosaminyltransferase, ec:2.4.1.68 - 6-alpha-L-fucosyltransferase, ec:2.4.1.131 - alpha-1,2-mannosyltransferase, ec:2.4.1.258 - alpha-1,3-mannosyltransferase, ec:2.4.1.141 - N-acetylglucosaminyltransferase, ec:2.4.1.132 - alpha-1,3-mannosyltransferase, ec:2.4.1.143 - 2-beta-N-acetylglucosaminyltransferase, ec:3.2.1.52 -…
TRINITY_DN9875_c0_g1_i5	T cell receptor signaling pathway, PD-L1 expression and PD-1 checkpoint pathway in cancer, Th1 and Th2 cell differentiation	map04660, map05235, map04658	2, 1, 1	ec:2.7.10.2 - protein-tyrosine kinase, ec:3.1.3.16 - phosphatase, ec:3.1.3.16 - phosphatase, ec:3.1.3.16 - phosphatase
TRINITY_DN10173_c0_g1_i2	Oxidative phosphorylation	map00190	5	ec:3.6.1.1 - diphosphatase, ec:1.3.5.1 - dehydrogenase, ec:7.1.2.1 - H+-exporting transporter, ec:1.6.99.3 - dehydrogenase, ec:7.1.1.2 - reductase (H+-translocating)
TRINITY_DN195160_c0_g1_i2	Purine metabolism, Thiamine metabolism	map00230, map00730	54, 7	ec:3.6.1.15 - phosphatase, ec:4.6.1.2 - cyclase, ec:3.1.4.35 - phosphodiesterase, ec:3.5.4.10 - cyclohydrolase, ec:3.1.5.1 - deoxy-GTPase, ec:3.6.1.9 - diphosphatase, ec:3.5.4.3 - deaminase, ec:3.6.1.17 - (asymmetrical), ec:1.17.4.1 - reductase, ec:3.6.1.3 - adenylpyrophosphatase, ec:3.1.4.17 - phosphodiesterase, ec:4.3.2.2 - lyase, ec:1.7.1.7 - reductase, ec:1.17.1.4 - dehydrogenase, ec:2.7.7.4 …
TRINITY_DN5425_c0_g1_i11	Pyrimidine metabolism, Drug metabolism - other enzymes	map00240, map00983	29, 20	ec:2.7.1.48 - kinase, ec:3.5.2.2 - hydantoinase, ec:1.3.5.2 - dehydrogenase (quinone), ec:3.6.1.9 - diphosphatase, ec:6.3.4.2 - synthase (glutamine hydrolysing), ec:2.1.1.45 - synthase, ec:3.6.1.17 - (asymmetrical), ec:1.17.4.1 - reductase, ec:2.1.3.2 - carbamoyltransferase, ec:2.4.2.10 - phosphoribosyltransferase, ec:3.6.1.12 - diphosphatase, ec:3.5.4.12 - deaminase, ec:3.6.1.23 - diphosphatase,…
TRINITY_DN5425_c0_g1_i10	Pyrimidine metabolism, Drug metabolism - other enzymes	map00240, map00983	29, 20	ec:2.7.1.48 - kinase, ec:3.5.2.2 - hydantoinase, ec:1.3.5.2 - dehydrogenase (quinone), ec:3.6.1.9 - diphosphatase, ec:6.3.4.2 - synthase (glutamine hydrolysing), ec:2.1.1.45 - synthase, ec:3.6.1.17 - (asymmetrical), ec:1.17.4.1 - reductase, ec:2.1.3.2 - carbamoyltransferase, ec:2.4.2.10 - phosphoribosyltransferase, ec:3.6.1.12 - diphosphatase, ec:3.5.4.12 - deaminase, ec:3.6.1.23 - diphosphatase,…
TRINITY_DN5425_c0_g1_i13	Pyrimidine metabolism, Drug metabolism - other enzymes	map00240, map00983	29, 20	ec:2.7.1.48 - kinase, ec:3.5.2.2 - hydantoinase, ec:1.3.5.2 - dehydrogenase (quinone), ec:3.6.1.9 - diphosphatase, ec:6.3.4.2 - synthase (glutamine hydrolysing), ec:2.1.1.45 - synthase, ec:3.6.1.17 - (asymmetrical), ec:1.17.4.1 - reductase, ec:2.1.3.2 - carbamoyltransferase, ec:2.4.2.10 - phosphoribosyltransferase, ec:3.6.1.12 - diphosphatase, ec:3.5.4.12 - deaminase, ec:3.6.1.23 - diphosphatase,…
TRINITY_DN5425_c0_g1_i15	Pyrimidine metabolism, Drug metabolism - other enzymes	map00240, map00983	29, 20	ec:2.7.1.48 - kinase, ec:3.5.2.2 - hydantoinase, ec:1.3.5.2 - dehydrogenase (quinone), ec:3.6.1.9 - diphosphatase, ec:6.3.4.2 - synthase (glutamine hydrolysing), ec:2.1.1.45 - synthase, ec:3.6.1.17 - (asymmetrical), ec:1.17.4.1 - reductase, ec:2.1.3.2 - carbamoyltransferase, ec:2.4.2.10 - phosphoribosyltransferase, ec:3.6.1.12 - diphosphatase, ec:3.5.4.12 - deaminase, ec:3.6.1.23 - diphosphatase,…
TRINITY_DN5425_c0_g1_i14	Pyrimidine metabolism, Drug metabolism - other enzymes	map00240, map00983	29, 20	ec:2.7.1.48 - kinase, ec:3.5.2.2 - hydantoinase, ec:1.3.5.2 - dehydrogenase (quinone), ec:3.6.1.9 - diphosphatase, ec:6.3.4.2 - synthase (glutamine hydrolysing), ec:2.1.1.45 - synthase, ec:3.6.1.17 - (asymmetrical), ec:1.17.4.1 - reductase, ec:2.1.3.2 - carbamoyltransferase, ec:2.4.2.10 - phosphoribosyltransferase, ec:3.6.1.12 - diphosphatase, ec:3.5.4.12 - deaminase, ec:3.6.1.23 - diphosphatase,…
TRINITY_DN5425_c0_g1_i17	Pyrimidine metabolism, Drug metabolism - other enzymes	map00240, map00983	29, 20	ec:2.7.1.48 - kinase, ec:3.5.2.2 - hydantoinase, ec:1.3.5.2 - dehydrogenase (quinone), ec:3.6.1.9 - diphosphatase, ec:6.3.4.2 - synthase (glutamine hydrolysing), ec:2.1.1.45 - synthase, ec:3.6.1.17 - (asymmetrical), ec:1.17.4.1 - reductase, ec:2.1.3.2 - carbamoyltransferase, ec:2.4.2.10 - phosphoribosyltransferase, ec:3.6.1.12 - diphosphatase, ec:3.5.4.12 - deaminase, ec:3.6.1.23 - diphosphatase,…
TRINITY_DN5425_c0_g1_i16	Pyrimidine metabolism, Drug metabolism - other enzymes	map00240, map00983	29, 20	ec:2.7.1.48 - kinase, ec:3.5.2.2 - hydantoinase, ec:1.3.5.2 - dehydrogenase (quinone), ec:3.6.1.9 - diphosphatase, ec:6.3.4.2 - synthase (glutamine hydrolysing), ec:2.1.1.45 - synthase, ec:3.6.1.17 - (asymmetrical), ec:1.17.4.1 - reductase, ec:2.1.3.2 - carbamoyltransferase, ec:2.4.2.10 - phosphoribosyltransferase, ec:3.6.1.12 - diphosphatase, ec:3.5.4.12 - deaminase, ec:3.6.1.23 - diphosphatase,…
TRINITY_DN20220_c1_g1_i1	Phenylpropanoid biosynthesis	map00940	2	ec:1.11.1.7 - lactoperoxidase, ec:3.2.1.21 - gentiobiase
TRINITY_DN10265_c0_g1_i1	Terpenoid backbone biosynthesis	map00900	16	ec:2.7.4.2 - kinase, ec:2.5.1.84 - diphosphate synthase [geranyl-diphosphate specific], ec:1.8.3.5 - oxidase, ec:2.3.3.10 - synthase, ec:2.5.1.58 - farnesyltransferase, ec:2.7.1.36 - kinase, ec:1.1.1.34 - reductase (NADPH), ec:2.1.1.100 - O-methyltransferase, ec:4.1.1.33 - decarboxylase, ec:2.5.1.10 - diphosphate synthase, ec:2.5.1.85 - diphosphate synthase [geranylgeranyl-diphosphate specific], …
TRINITY_DN5425_c0_g1_i18	Pyrimidine metabolism, Drug metabolism - other enzymes	map00240, map00983	29, 20	ec:2.7.1.48 - kinase, ec:3.5.2.2 - hydantoinase, ec:1.3.5.2 - dehydrogenase (quinone), ec:3.6.1.9 - diphosphatase, ec:6.3.4.2 - synthase (glutamine hydrolysing), ec:2.1.1.45 - synthase, ec:3.6.1.17 - (asymmetrical), ec:1.17.4.1 - reductase, ec:2.1.3.2 - carbamoyltransferase, ec:2.4.2.10 - phosphoribosyltransferase, ec:3.6.1.12 - diphosphatase, ec:3.5.4.12 - deaminase, ec:3.6.1.23 - diphosphatase,…
TRINITY_DN9708_c0_g1_i2	N-Glycan biosynthesis	map00510	20	ec:2.4.1.38 - beta-1,4-galactosyltransferase, ec:2.4.1.101 - 2-beta-N-acetylglucosaminyltransferase, ec:2.4.1.68 - 6-alpha-L-fucosyltransferase, ec:2.4.1.131 - alpha-1,2-mannosyltransferase, ec:2.4.1.256 - alpha-1,2-glucosyltransferase, ec:2.4.1.144 - 4-beta-N-acetylglucosaminyltransferase, ec:2.4.1.155 - 6-beta-N-acetylglucosaminyltransferase, ec:2.4.1.258 - alpha-1,3-mannosyltransferase, ec:3.2…
TRINITY_DN17436_c0_g1_i3	Purine metabolism, Thiamine metabolism	map00230, map00730	54, 7	ec:3.6.1.15 - phosphatase, ec:4.6.1.2 - cyclase, ec:3.1.4.35 - phosphodiesterase, ec:3.5.4.10 - cyclohydrolase, ec:3.1.5.1 - deoxy-GTPase, ec:3.6.1.9 - diphosphatase, ec:3.5.4.3 - deaminase, ec:3.6.1.17 - (asymmetrical), ec:1.17.4.1 - reductase, ec:3.6.1.3 - adenylpyrophosphatase, ec:3.1.4.17 - phosphodiesterase, ec:4.3.2.2 - lyase, ec:1.7.1.7 - reductase, ec:1.17.1.4 - dehydrogenase, ec:2.7.7.4 …
TRINITY_DN1819_c0_g1_i9	Ubiquinone and other terpenoid-quinone biosynthesis	map00130	7	ec:2.5.1.39 - polyprenyltransferase, ec:4.1.1.90 - 4-carboxylase, ec:1.6.5.2 - dehydrogenase (quinone), ec:2.1.1.64 - 3-O-methyltransferase, ec:1.13.11.27 - dioxygenase, ec:2.1.1.201 - methylase, ec:2.1.1.114 - methyltransferase
TRINITY_DN21404_c0_g2_i1	T cell receptor signaling pathway, PD-L1 expression and PD-1 checkpoint pathway in cancer, Th1 and Th2 cell differentiation	map04660, map05235, map04658	2, 1, 1	ec:2.7.10.2 - protein-tyrosine kinase, ec:3.1.3.16 - phosphatase, ec:3.1.3.16 - phosphatase, ec:3.1.3.16 - phosphatase
TRINITY_DN1819_c0_g1_i8	Ubiquinone and other terpenoid-quinone biosynthesis	map00130	7	ec:2.5.1.39 - polyprenyltransferase, ec:4.1.1.90 - 4-carboxylase, ec:1.6.5.2 - dehydrogenase (quinone), ec:2.1.1.64 - 3-O-methyltransferase, ec:1.13.11.27 - dioxygenase, ec:2.1.1.201 - methylase, ec:2.1.1.114 - methyltransferase
TRINITY_DN12838_c0_g1_i1	Drug metabolism - other enzymes, Purine metabolism, Caffeine metabolism	map00983, map00230, map00232	20, 54, 3	ec:2.7.1.48 - kinase, ec:3.5.2.2 - hydantoinase, ec:3.1.1.1 - ali-esterase, ec:1.17.4.1 - reductase, ec:2.4.2.10 - phosphoribosyltransferase, ec:3.2.1.31 - beta-glucuronide glucuronohydrolase glucuronidase, ec:3.6.1.23 - diphosphatase, ec:3.5.4.5 - deaminase, ec:6.3.5.2 - synthase (glutamine-hydrolysing), ec:2.3.1.5 - N-acetyltransferase, ec:2.4.1.17 - 1-naphthol glucuronyltransferase, ec:2.4.2.8…
TRINITY_DN17436_c0_g1_i1	Purine metabolism, Thiamine metabolism	map00230, map00730	54, 7	ec:3.6.1.15 - phosphatase, ec:4.6.1.2 - cyclase, ec:3.1.4.35 - phosphodiesterase, ec:3.5.4.10 - cyclohydrolase, ec:3.1.5.1 - deoxy-GTPase, ec:3.6.1.9 - diphosphatase, ec:3.5.4.3 - deaminase, ec:3.6.1.17 - (asymmetrical), ec:1.17.4.1 - reductase, ec:3.6.1.3 - adenylpyrophosphatase, ec:3.1.4.17 - phosphodiesterase, ec:4.3.2.2 - lyase, ec:1.7.1.7 - reductase, ec:1.17.1.4 - dehydrogenase, ec:2.7.7.4 …
TRINITY_DN1819_c0_g1_i5	Ubiquinone and other terpenoid-quinone biosynthesis	map00130	7	ec:2.5.1.39 - polyprenyltransferase, ec:4.1.1.90 - 4-carboxylase, ec:1.6.5.2 - dehydrogenase (quinone), ec:2.1.1.64 - 3-O-methyltransferase, ec:1.13.11.27 - dioxygenase, ec:2.1.1.201 - methylase, ec:2.1.1.114 - methyltransferase
TRINITY_DN1819_c0_g1_i4	Ubiquinone and other terpenoid-quinone biosynthesis	map00130	7	ec:2.5.1.39 - polyprenyltransferase, ec:4.1.1.90 - 4-carboxylase, ec:1.6.5.2 - dehydrogenase (quinone), ec:2.1.1.64 - 3-O-methyltransferase, ec:1.13.11.27 - dioxygenase, ec:2.1.1.201 - methylase, ec:2.1.1.114 - methyltransferase
TRINITY_DN9708_c0_g1_i3	N-Glycan biosynthesis	map00510	20	ec:2.4.1.38 - beta-1,4-galactosyltransferase, ec:2.4.1.101 - 2-beta-N-acetylglucosaminyltransferase, ec:2.4.1.68 - 6-alpha-L-fucosyltransferase, ec:2.4.1.131 - alpha-1,2-mannosyltransferase, ec:2.4.1.256 - alpha-1,2-glucosyltransferase, ec:2.4.1.144 - 4-beta-N-acetylglucosaminyltransferase, ec:2.4.1.155 - 6-beta-N-acetylglucosaminyltransferase, ec:2.4.1.258 - alpha-1,3-mannosyltransferase, ec:3.2…
TRINITY_DN9708_c0_g1_i4	N-Glycan biosynthesis	map00510	20	ec:2.4.1.38 - beta-1,4-galactosyltransferase, ec:2.4.1.101 - 2-beta-N-acetylglucosaminyltransferase, ec:2.4.1.68 - 6-alpha-L-fucosyltransferase, ec:2.4.1.131 - alpha-1,2-mannosyltransferase, ec:2.4.1.256 - alpha-1,2-glucosyltransferase, ec:2.4.1.144 - 4-beta-N-acetylglucosaminyltransferase, ec:2.4.1.155 - 6-beta-N-acetylglucosaminyltransferase, ec:2.4.1.258 - alpha-1,3-mannosyltransferase, ec:3.2…
TRINITY_DN1819_c0_g1_i6	Ubiquinone and other terpenoid-quinone biosynthesis	map00130	7	ec:2.5.1.39 - polyprenyltransferase, ec:4.1.1.90 - 4-carboxylase, ec:1.6.5.2 - dehydrogenase (quinone), ec:2.1.1.64 - 3-O-methyltransferase, ec:1.13.11.27 - dioxygenase, ec:2.1.1.201 - methylase, ec:2.1.1.114 - methyltransferase
TRINITY_DN20220_c0_g1_i1	Arginine and proline metabolism	map00330	21	ec:2.7.2.11 - 5-kinase, ec:3.5.1.4 - acylamidase, ec:1.5.1.2 - reductase, ec:1.2.1.3 - dehydrogenase (NAD+), ec:1.2.1.41 - dehydrogenase, ec:2.6.1.13 - aminotransferase, ec:1.2.1.19 - dehydrogenase, ec:1.4.3.3 - oxidase, ec:2.5.1.22 - synthase, ec:4.1.1.17 - decarboxylase, ec:1.14.11.2 - 4-dioxygenase, ec:4.1.1.50 - decarboxylase, ec:2.6.1.1 - transaminase, ec:2.3.1.57 - N-acetyltransferase, ec:2…
TRINITY_DN100856_c0_g1_i1	Purine metabolism, Thiamine metabolism	map00230, map00730	54, 7	ec:3.6.1.15 - phosphatase, ec:4.6.1.2 - cyclase, ec:3.1.4.35 - phosphodiesterase, ec:3.5.4.10 - cyclohydrolase, ec:3.1.5.1 - deoxy-GTPase, ec:3.6.1.9 - diphosphatase, ec:3.5.4.3 - deaminase, ec:3.6.1.17 - (asymmetrical), ec:1.17.4.1 - reductase, ec:3.6.1.3 - adenylpyrophosphatase, ec:3.1.4.17 - phosphodiesterase, ec:4.3.2.2 - lyase, ec:1.7.1.7 - reductase, ec:1.17.1.4 - dehydrogenase, ec:2.7.7.4 …
TRINITY_DN265459_c0_g1_i1	Purine metabolism, Thiamine metabolism	map00230, map00730	54, 7	ec:3.6.1.15 - phosphatase, ec:4.6.1.2 - cyclase, ec:3.1.4.35 - phosphodiesterase, ec:3.5.4.10 - cyclohydrolase, ec:3.1.5.1 - deoxy-GTPase, ec:3.6.1.9 - diphosphatase, ec:3.5.4.3 - deaminase, ec:3.6.1.17 - (asymmetrical), ec:1.17.4.1 - reductase, ec:3.6.1.3 - adenylpyrophosphatase, ec:3.1.4.17 - phosphodiesterase, ec:4.3.2.2 - lyase, ec:1.7.1.7 - reductase, ec:1.17.1.4 - dehydrogenase, ec:2.7.7.4 …
TRINITY_DN34929_c2_g1_i1	Purine metabolism, Thiamine metabolism	map00230, map00730	54, 7	ec:3.6.1.15 - phosphatase, ec:4.6.1.2 - cyclase, ec:3.1.4.35 - phosphodiesterase, ec:3.5.4.10 - cyclohydrolase, ec:3.1.5.1 - deoxy-GTPase, ec:3.6.1.9 - diphosphatase, ec:3.5.4.3 - deaminase, ec:3.6.1.17 - (asymmetrical), ec:1.17.4.1 - reductase, ec:3.6.1.3 - adenylpyrophosphatase, ec:3.1.4.17 - phosphodiesterase, ec:4.3.2.2 - lyase, ec:1.7.1.7 - reductase, ec:1.17.1.4 - dehydrogenase, ec:2.7.7.4 …
TRINITY_DN998_c4_g1_i1	Purine metabolism, Thiamine metabolism	map00230, map00730	54, 7	ec:3.6.1.15 - phosphatase, ec:4.6.1.2 - cyclase, ec:3.1.4.35 - phosphodiesterase, ec:3.5.4.10 - cyclohydrolase, ec:3.1.5.1 - deoxy-GTPase, ec:3.6.1.9 - diphosphatase, ec:3.5.4.3 - deaminase, ec:3.6.1.17 - (asymmetrical), ec:1.17.4.1 - reductase, ec:3.6.1.3 - adenylpyrophosphatase, ec:3.1.4.17 - phosphodiesterase, ec:4.3.2.2 - lyase, ec:1.7.1.7 - reductase, ec:1.17.1.4 - dehydrogenase, ec:2.7.7.4 …
TRINITY_DN129163_c0_g1_i1	Purine metabolism, Thiamine metabolism	map00230, map00730	54, 7	ec:3.6.1.15 - phosphatase, ec:4.6.1.2 - cyclase, ec:3.1.4.35 - phosphodiesterase, ec:3.5.4.10 - cyclohydrolase, ec:3.1.5.1 - deoxy-GTPase, ec:3.6.1.9 - diphosphatase, ec:3.5.4.3 - deaminase, ec:3.6.1.17 - (asymmetrical), ec:1.17.4.1 - reductase, ec:3.6.1.3 - adenylpyrophosphatase, ec:3.1.4.17 - phosphodiesterase, ec:4.3.2.2 - lyase, ec:1.7.1.7 - reductase, ec:1.17.1.4 - dehydrogenase, ec:2.7.7.4 …
TRINITY_DN41646_c0_g1_i1	Drug metabolism - cytochrome P450, Ascorbate and aldarate metabolism, Glycolysis / Gluconeogenesis, Insect hormone biosynthesis, Valine, leucine and isoleucine degradation, Fatty acid degradation, Limonene and pinene degradation, Tryptophan metabolism, Arginine and proline metabolism, Metabolism of xenobiotics by cytochrome P450, Phenylalanine metabolism, Lysine degradation, Glycerolipid metaboli…	map00982, map00053, map00010, map00981, map00280, map00071, map00903, map00380, map00330, map00980, map00360, map00310, map00561, map00620, map00350, map00340, map00625, map00410	5, 8, 27, 1, 22, 13, 2, 17, 21, 7, 9, 18, 19, 24, 12, 8, 5, 12	ec:1.2.1.5 - dehydrogenase [NAD(P)+], ec:2.4.1.17 - 1-naphthol glucuronyltransferase, ec:1.1.1.1 - dehydrogenase, ec:1.14.13.8 - monooxygenase, ec:2.5.1.18 - transferase, ec:1.2.1.3 - dehydrogenase (NAD+), ec:2.7.7.64 - uridylyltransferase, ec:1.13.99.1 - oxygenase, ec:5.1.3.18 - 3,5-epimerase, ec:2.4.1.17 - 1-naphthol glucuronyltransferase, ec:1.1.1.20 - reductase, ec:1.1.1.22 - 6-dehydrogenase,…
TRINITY_DN10173_c0_g1_i8	Oxidative phosphorylation	map00190	5	ec:3.6.1.1 - diphosphatase, ec:1.3.5.1 - dehydrogenase, ec:7.1.2.1 - H+-exporting transporter, ec:1.6.99.3 - dehydrogenase, ec:7.1.1.2 - reductase (H+-translocating)
TRINITY_DN30232_c0_g1_i1	Purine metabolism, Thiamine metabolism	map00230, map00730	54, 7	ec:3.6.1.15 - phosphatase, ec:4.6.1.2 - cyclase, ec:3.1.4.35 - phosphodiesterase, ec:3.5.4.10 - cyclohydrolase, ec:3.1.5.1 - deoxy-GTPase, ec:3.6.1.9 - diphosphatase, ec:3.5.4.3 - deaminase, ec:3.6.1.17 - (asymmetrical), ec:1.17.4.1 - reductase, ec:3.6.1.3 - adenylpyrophosphatase, ec:3.1.4.17 - phosphodiesterase, ec:4.3.2.2 - lyase, ec:1.7.1.7 - reductase, ec:1.17.1.4 - dehydrogenase, ec:2.7.7.4 …
TRINITY_DN67515_c2_g1_i1	Other glycan degradation	map00511	9	ec:3.2.1.45 - psychosine hydrolase, ec:3.2.1.51 - alpha-fucosidase, ec:3.2.1.23 - lactase (ambiguous), ec:3.2.1.25 - mannanase, ec:3.5.1.26 - aspartylglucosylamine deaspartylase, ec:3.2.1.96 - endo-beta-N-acetylglucosaminidase, ec:3.2.1.18 - neuraminidase, ec:3.2.1.52 - hexosaminidase, ec:3.2.1.24 - alpha-D-mannosidase
TRINITY_DN74102_c0_g1_i1	Pyrimidine metabolism, Nicotinate and nicotinamide metabolism, Purine metabolism, Riboflavin metabolism, Pantothenate and CoA biosynthesis, Starch and sucrose metabolism	map00240, map00760, map00230, map00740, map00770, map00500	29, 16, 54, 7, 10, 21	ec:2.7.1.48 - kinase, ec:3.5.2.2 - hydantoinase, ec:1.3.5.2 - dehydrogenase (quinone), ec:3.6.1.9 - diphosphatase, ec:6.3.4.2 - synthase (glutamine hydrolysing), ec:2.1.1.45 - synthase, ec:3.6.1.17 - (asymmetrical), ec:1.17.4.1 - reductase, ec:2.1.3.2 - carbamoyltransferase, ec:2.4.2.10 - phosphoribosyltransferase, ec:3.6.1.12 - diphosphatase, ec:3.5.4.12 - deaminase, ec:3.6.1.23 - diphosphatase,…
TRINITY_DN241423_c0_g1_i1	T cell receptor signaling pathway, PD-L1 expression and PD-1 checkpoint pathway in cancer, Th1 and Th2 cell differentiation	map04660, map05235, map04658	2, 1, 1	ec:2.7.10.2 - protein-tyrosine kinase, ec:3.1.3.16 - phosphatase, ec:3.1.3.16 - phosphatase, ec:3.1.3.16 - phosphatase
TRINITY_DN49116_c0_g2_i10	Purine metabolism, Thiamine metabolism	map00230, map00730	54, 7	ec:3.6.1.15 - phosphatase, ec:4.6.1.2 - cyclase, ec:3.1.4.35 - phosphodiesterase, ec:3.5.4.10 - cyclohydrolase, ec:3.1.5.1 - deoxy-GTPase, ec:3.6.1.9 - diphosphatase, ec:3.5.4.3 - deaminase, ec:3.6.1.17 - (asymmetrical), ec:1.17.4.1 - reductase, ec:3.6.1.3 - adenylpyrophosphatase, ec:3.1.4.17 - phosphodiesterase, ec:4.3.2.2 - lyase, ec:1.7.1.7 - reductase, ec:1.17.1.4 - dehydrogenase, ec:2.7.7.4 …
TRINITY_DN9742_c0_g2_i4	T cell receptor signaling pathway, PD-L1 expression and PD-1 checkpoint pathway in cancer, Th1 and Th2 cell differentiation	map04660, map05235, map04658	2, 1, 1	ec:2.7.10.2 - protein-tyrosine kinase, ec:3.1.3.16 - phosphatase, ec:3.1.3.16 - phosphatase, ec:3.1.3.16 - phosphatase
TRINITY_DN49116_c0_g2_i14	Purine metabolism, Thiamine metabolism	map00230, map00730	54, 7	ec:3.6.1.15 - phosphatase, ec:4.6.1.2 - cyclase, ec:3.1.4.35 - phosphodiesterase, ec:3.5.4.10 - cyclohydrolase, ec:3.1.5.1 - deoxy-GTPase, ec:3.6.1.9 - diphosphatase, ec:3.5.4.3 - deaminase, ec:3.6.1.17 - (asymmetrical), ec:1.17.4.1 - reductase, ec:3.6.1.3 - adenylpyrophosphatase, ec:3.1.4.17 - phosphodiesterase, ec:4.3.2.2 - lyase, ec:1.7.1.7 - reductase, ec:1.17.1.4 - dehydrogenase, ec:2.7.7.4 …
TRINITY_DN97147_c0_g1_i1	Biosynthesis of unsaturated fatty acids, Fatty acid elongation, Fatty acid biosynthesis	map01040, map00062, map00061	9, 12, 5	ec:2.3.1.199 - 3-oxoacyl-CoA synthase, ec:1.14.19.1 - 9-desaturase, ec:1.1.1.330 - 3-oxoacyl-CoA reductase, ec:1.3.1.93 - enoyl-CoA reductase, ec:1.3.3.6 - oxidase, ec:4.2.1.134 - (3R)-3-hydroxyacyl-CoA dehydratase, ec:2.3.1.16 - C-acyltransferase, ec:2.3.1.176 - C-acyltransferase, ec:3.1.2.2 - hydrolase, ec:2.3.1.199 - 3-oxoacyl-CoA synthase, ec:1.3.1.38 - reductase (NADPH), ec:1.1.1.35 - dehydr…
TRINITY_DN49116_c0_g2_i13	Purine metabolism, Thiamine metabolism	map00230, map00730	54, 7	ec:3.6.1.15 - phosphatase, ec:4.6.1.2 - cyclase, ec:3.1.4.35 - phosphodiesterase, ec:3.5.4.10 - cyclohydrolase, ec:3.1.5.1 - deoxy-GTPase, ec:3.6.1.9 - diphosphatase, ec:3.5.4.3 - deaminase, ec:3.6.1.17 - (asymmetrical), ec:1.17.4.1 - reductase, ec:3.6.1.3 - adenylpyrophosphatase, ec:3.1.4.17 - phosphodiesterase, ec:4.3.2.2 - lyase, ec:1.7.1.7 - reductase, ec:1.17.1.4 - dehydrogenase, ec:2.7.7.4 …
TRINITY_DN4325_c0_g1_i11	Purine metabolism, Thiamine metabolism	map00230, map00730	54, 7	ec:3.6.1.15 - phosphatase, ec:4.6.1.2 - cyclase, ec:3.1.4.35 - phosphodiesterase, ec:3.5.4.10 - cyclohydrolase, ec:3.1.5.1 - deoxy-GTPase, ec:3.6.1.9 - diphosphatase, ec:3.5.4.3 - deaminase, ec:3.6.1.17 - (asymmetrical), ec:1.17.4.1 - reductase, ec:3.6.1.3 - adenylpyrophosphatase, ec:3.1.4.17 - phosphodiesterase, ec:4.3.2.2 - lyase, ec:1.7.1.7 - reductase, ec:1.17.1.4 - dehydrogenase, ec:2.7.7.4 …
TRINITY_DN4325_c0_g1_i12	Purine metabolism, Thiamine metabolism	map00230, map00730	54, 7	ec:3.6.1.15 - phosphatase, ec:4.6.1.2 - cyclase, ec:3.1.4.35 - phosphodiesterase, ec:3.5.4.10 - cyclohydrolase, ec:3.1.5.1 - deoxy-GTPase, ec:3.6.1.9 - diphosphatase, ec:3.5.4.3 - deaminase, ec:3.6.1.17 - (asymmetrical), ec:1.17.4.1 - reductase, ec:3.6.1.3 - adenylpyrophosphatase, ec:3.1.4.17 - phosphodiesterase, ec:4.3.2.2 - lyase, ec:1.7.1.7 - reductase, ec:1.17.1.4 - dehydrogenase, ec:2.7.7.4 …
TRINITY_DN4325_c0_g1_i13	Purine metabolism, Thiamine metabolism	map00230, map00730	54, 7	ec:3.6.1.15 - phosphatase, ec:4.6.1.2 - cyclase, ec:3.1.4.35 - phosphodiesterase, ec:3.5.4.10 - cyclohydrolase, ec:3.1.5.1 - deoxy-GTPase, ec:3.6.1.9 - diphosphatase, ec:3.5.4.3 - deaminase, ec:3.6.1.17 - (asymmetrical), ec:1.17.4.1 - reductase, ec:3.6.1.3 - adenylpyrophosphatase, ec:3.1.4.17 - phosphodiesterase, ec:4.3.2.2 - lyase, ec:1.7.1.7 - reductase, ec:1.17.1.4 - dehydrogenase, ec:2.7.7.4 …
TRINITY_DN4325_c0_g1_i14	Purine metabolism, Thiamine metabolism	map00230, map00730	54, 7	ec:3.6.1.15 - phosphatase, ec:4.6.1.2 - cyclase, ec:3.1.4.35 - phosphodiesterase, ec:3.5.4.10 - cyclohydrolase, ec:3.1.5.1 - deoxy-GTPase, ec:3.6.1.9 - diphosphatase, ec:3.5.4.3 - deaminase, ec:3.6.1.17 - (asymmetrical), ec:1.17.4.1 - reductase, ec:3.6.1.3 - adenylpyrophosphatase, ec:3.1.4.17 - phosphodiesterase, ec:4.3.2.2 - lyase, ec:1.7.1.7 - reductase, ec:1.17.1.4 - dehydrogenase, ec:2.7.7.4 …
TRINITY_DN4325_c0_g1_i15	Purine metabolism, Thiamine metabolism	map00230, map00730	54, 7	ec:3.6.1.15 - phosphatase, ec:4.6.1.2 - cyclase, ec:3.1.4.35 - phosphodiesterase, ec:3.5.4.10 - cyclohydrolase, ec:3.1.5.1 - deoxy-GTPase, ec:3.6.1.9 - diphosphatase, ec:3.5.4.3 - deaminase, ec:3.6.1.17 - (asymmetrical), ec:1.17.4.1 - reductase, ec:3.6.1.3 - adenylpyrophosphatase, ec:3.1.4.17 - phosphodiesterase, ec:4.3.2.2 - lyase, ec:1.7.1.7 - reductase, ec:1.17.1.4 - dehydrogenase, ec:2.7.7.4 …
TRINITY_DN4325_c0_g1_i16	Purine metabolism, Thiamine metabolism	map00230, map00730	54, 7	ec:3.6.1.15 - phosphatase, ec:4.6.1.2 - cyclase, ec:3.1.4.35 - phosphodiesterase, ec:3.5.4.10 - cyclohydrolase, ec:3.1.5.1 - deoxy-GTPase, ec:3.6.1.9 - diphosphatase, ec:3.5.4.3 - deaminase, ec:3.6.1.17 - (asymmetrical), ec:1.17.4.1 - reductase, ec:3.6.1.3 - adenylpyrophosphatase, ec:3.1.4.17 - phosphodiesterase, ec:4.3.2.2 - lyase, ec:1.7.1.7 - reductase, ec:1.17.1.4 - dehydrogenase, ec:2.7.7.4 …
TRINITY_DN4003_c1_g1_i10	Purine metabolism, Thiamine metabolism	map00230, map00730	54, 7	ec:3.6.1.15 - phosphatase, ec:4.6.1.2 - cyclase, ec:3.1.4.35 - phosphodiesterase, ec:3.5.4.10 - cyclohydrolase, ec:3.1.5.1 - deoxy-GTPase, ec:3.6.1.9 - diphosphatase, ec:3.5.4.3 - deaminase, ec:3.6.1.17 - (asymmetrical), ec:1.17.4.1 - reductase, ec:3.6.1.3 - adenylpyrophosphatase, ec:3.1.4.17 - phosphodiesterase, ec:4.3.2.2 - lyase, ec:1.7.1.7 - reductase, ec:1.17.1.4 - dehydrogenase, ec:2.7.7.4 …
TRINITY_DN14054_c0_g2_i1	Pentose phosphate pathway, Fructose and mannose metabolism, Carbon fixation in photosynthetic organisms	map00030, map00051, map00710	17, 21, 15	ec:5.1.3.1 - 3-epimerase, ec:2.7.1.12 - gluconokinase (phosphorylating), ec:5.4.2.2 - (alpha-D-glucose-1,6-bisphosphate-dependent), ec:2.7.1.11 - phosphohexokinase, ec:2.2.1.2 - dihydroxyacetonetransferase, ec:5.3.1.9 - isomerase, ec:4.1.2.4 - aldolase, ec:1.1.1.44 - dehydrogenase (NADP+-dependent, decarboxylating), ec:3.1.3.11 - hexose diphosphatase, ec:5.4.2.7 - phosphodeoxyribomutase, ec:5.3.1…
TRINITY_DN174924_c0_g1_i1	Purine metabolism, Thiamine metabolism, T cell receptor signaling pathway, PD-L1 expression and PD-1 checkpoint pathway in cancer, Th1 and Th2 cell differentiation	map00230, map00730, map04660, map05235, map04658	54, 7, 2, 1, 1	ec:3.6.1.15 - phosphatase, ec:4.6.1.2 - cyclase, ec:3.1.4.35 - phosphodiesterase, ec:3.5.4.10 - cyclohydrolase, ec:3.1.5.1 - deoxy-GTPase, ec:3.6.1.9 - diphosphatase, ec:3.5.4.3 - deaminase, ec:3.6.1.17 - (asymmetrical), ec:1.17.4.1 - reductase, ec:3.6.1.3 - adenylpyrophosphatase, ec:3.1.4.17 - phosphodiesterase, ec:4.3.2.2 - lyase, ec:1.7.1.7 - reductase, ec:1.17.1.4 - dehydrogenase, ec:2.7.7.4 …
TRINITY_DN246_c0_g1_i4	Terpenoid backbone biosynthesis	map00900	16	ec:2.7.4.2 - kinase, ec:2.5.1.84 - diphosphate synthase [geranyl-diphosphate specific], ec:1.8.3.5 - oxidase, ec:2.3.3.10 - synthase, ec:2.5.1.58 - farnesyltransferase, ec:2.7.1.36 - kinase, ec:1.1.1.34 - reductase (NADPH), ec:2.1.1.100 - O-methyltransferase, ec:4.1.1.33 - decarboxylase, ec:2.5.1.10 - diphosphate synthase, ec:2.5.1.85 - diphosphate synthase [geranylgeranyl-diphosphate specific], …
TRINITY_DN16667_c0_g1_i1	Aminoacyl-tRNA biosynthesis	map00970	22	ec:6.1.1.22 - ligase, ec:6.1.1.19 - ligase, ec:2.1.2.9 - formyltransferase, ec:6.1.1.9 - ligase, ec:6.1.1.3 - ligase, ec:6.1.1.15 - ligase, ec:6.1.1.5 - ligase, ec:6.1.1.10 - ligase, ec:6.1.1.21 - ligase, ec:6.1.1.18 - ligase, ec:6.1.1.7 - ligase, ec:6.1.1.12 - ligase, ec:6.1.1.2 - ligase, ec:6.3.5.7 - synthase (glutamine-hydrolysing), ec:6.1.1.14 - ligase, ec:6.1.1.4 - ligase, ec:6.1.1.20 - liga…
TRINITY_DN7225_c0_g1_i3	T cell receptor signaling pathway, PD-L1 expression and PD-1 checkpoint pathway in cancer, Th1 and Th2 cell differentiation	map04660, map05235, map04658	2, 1, 1	ec:2.7.10.2 - protein-tyrosine kinase, ec:3.1.3.16 - phosphatase, ec:3.1.3.16 - phosphatase, ec:3.1.3.16 - phosphatase
TRINITY_DN1080_c1_g1_i1	Purine metabolism, Thiamine metabolism	map00230, map00730	54, 7	ec:3.6.1.15 - phosphatase, ec:4.6.1.2 - cyclase, ec:3.1.4.35 - phosphodiesterase, ec:3.5.4.10 - cyclohydrolase, ec:3.1.5.1 - deoxy-GTPase, ec:3.6.1.9 - diphosphatase, ec:3.5.4.3 - deaminase, ec:3.6.1.17 - (asymmetrical), ec:1.17.4.1 - reductase, ec:3.6.1.3 - adenylpyrophosphatase, ec:3.1.4.17 - phosphodiesterase, ec:4.3.2.2 - lyase, ec:1.7.1.7 - reductase, ec:1.17.1.4 - dehydrogenase, ec:2.7.7.4 …
TRINITY_DN1080_c1_g1_i2	Purine metabolism, Thiamine metabolism	map00230, map00730	54, 7	ec:3.6.1.15 - phosphatase, ec:4.6.1.2 - cyclase, ec:3.1.4.35 - phosphodiesterase, ec:3.5.4.10 - cyclohydrolase, ec:3.1.5.1 - deoxy-GTPase, ec:3.6.1.9 - diphosphatase, ec:3.5.4.3 - deaminase, ec:3.6.1.17 - (asymmetrical), ec:1.17.4.1 - reductase, ec:3.6.1.3 - adenylpyrophosphatase, ec:3.1.4.17 - phosphodiesterase, ec:4.3.2.2 - lyase, ec:1.7.1.7 - reductase, ec:1.17.1.4 - dehydrogenase, ec:2.7.7.4 …
TRINITY_DN7225_c0_g1_i6	T cell receptor signaling pathway, PD-L1 expression and PD-1 checkpoint pathway in cancer, Th1 and Th2 cell differentiation	map04660, map05235, map04658	2, 1, 1	ec:2.7.10.2 - protein-tyrosine kinase, ec:3.1.3.16 - phosphatase, ec:3.1.3.16 - phosphatase, ec:3.1.3.16 - phosphatase
TRINITY_DN2187_c0_g3_i1	Carbon fixation pathways in prokaryotes, Citrate cycle (TCA cycle), Glyoxylate and dicarboxylate metabolism	map00720, map00020, map00630	21, 17, 18	ec:1.1.1.35 - dehydrogenase, ec:6.2.1.1 - ligase, ec:6.4.1.3 - carboxylase, ec:4.1.3.25 - lyase, ec:1.5.1.5 - dehydrogenase (NADP+), ec:1.1.1.37 - dehydrogenase, ec:1.1.1.42 - dehydrogenase (NADP+), ec:6.2.1.5 - ligase (ADP-forming), ec:5.1.99.1 - epimerase, ec:1.3.5.1 - dehydrogenase, ec:6.4.1.2 - carboxylase, ec:2.3.3.8 - citrate synthase, ec:1.5.1.20 - reductase [NAD(P)H], ec:5.4.99.2 - mutase…
TRINITY_DN185510_c0_g1_i2	Drug metabolism - other enzymes, Nitrotoluene degradation, Caffeine metabolism	map00983, map00633, map00232	20, 1, 3	ec:2.7.1.48 - kinase, ec:3.5.2.2 - hydantoinase, ec:3.1.1.1 - ali-esterase, ec:1.17.4.1 - reductase, ec:2.4.2.10 - phosphoribosyltransferase, ec:3.2.1.31 - beta-glucuronide glucuronohydrolase glucuronidase, ec:3.6.1.23 - diphosphatase, ec:3.5.4.5 - deaminase, ec:6.3.5.2 - synthase (glutamine-hydrolysing), ec:2.3.1.5 - N-acetyltransferase, ec:2.4.1.17 - 1-naphthol glucuronyltransferase, ec:2.4.2.8…
TRINITY_DN185510_c0_g1_i1	Drug metabolism - other enzymes, Nitrotoluene degradation, Caffeine metabolism	map00983, map00633, map00232	20, 1, 3	ec:2.7.1.48 - kinase, ec:3.5.2.2 - hydantoinase, ec:3.1.1.1 - ali-esterase, ec:1.17.4.1 - reductase, ec:2.4.2.10 - phosphoribosyltransferase, ec:3.2.1.31 - beta-glucuronide glucuronohydrolase glucuronidase, ec:3.6.1.23 - diphosphatase, ec:3.5.4.5 - deaminase, ec:6.3.5.2 - synthase (glutamine-hydrolysing), ec:2.3.1.5 - N-acetyltransferase, ec:2.4.1.17 - 1-naphthol glucuronyltransferase, ec:2.4.2.8…
TRINITY_DN246_c0_g1_i9	Terpenoid backbone biosynthesis	map00900	16	ec:2.7.4.2 - kinase, ec:2.5.1.84 - diphosphate synthase [geranyl-diphosphate specific], ec:1.8.3.5 - oxidase, ec:2.3.3.10 - synthase, ec:2.5.1.58 - farnesyltransferase, ec:2.7.1.36 - kinase, ec:1.1.1.34 - reductase (NADPH), ec:2.1.1.100 - O-methyltransferase, ec:4.1.1.33 - decarboxylase, ec:2.5.1.10 - diphosphate synthase, ec:2.5.1.85 - diphosphate synthase [geranylgeranyl-diphosphate specific], …
TRINITY_DN65753_c2_g1_i1	Glycerophospholipid metabolism, Phosphatidylinositol signaling system, Ether lipid metabolism, Inositol phosphate metabolism	map00564, map04070, map00565, map00562	30, 24, 13, 25	ec:3.1.4.4 - D, ec:2.7.7.15 - cytidylyltransferase, ec:2.3.1.51 - O-acyltransferase, ec:2.7.8.5 - 1-phosphatidyltransferase, ec:2.3.1.23 - O-acyltransferase, ec:2.3.1.42 - O-acyltransferase, ec:2.7.8.11 - 3-phosphatidyltransferase, ec:2.1.1.17 - N-methyltransferase, ec:1.1.1.8 - dehydrogenase (NAD+), ec:4.1.1.65 - decarboxylase, ec:2.7.8.1 - EPT, ec:2.7.7.41 - cytidylyltransferase, ec:2.7.1.107 -…
TRINITY_DN246_c0_g1_i5	Terpenoid backbone biosynthesis	map00900	16	ec:2.7.4.2 - kinase, ec:2.5.1.84 - diphosphate synthase [geranyl-diphosphate specific], ec:1.8.3.5 - oxidase, ec:2.3.3.10 - synthase, ec:2.5.1.58 - farnesyltransferase, ec:2.7.1.36 - kinase, ec:1.1.1.34 - reductase (NADPH), ec:2.1.1.100 - O-methyltransferase, ec:4.1.1.33 - decarboxylase, ec:2.5.1.10 - diphosphate synthase, ec:2.5.1.85 - diphosphate synthase [geranylgeranyl-diphosphate specific], …
TRINITY_DN246_c0_g1_i6	Terpenoid backbone biosynthesis	map00900	16	ec:2.7.4.2 - kinase, ec:2.5.1.84 - diphosphate synthase [geranyl-diphosphate specific], ec:1.8.3.5 - oxidase, ec:2.3.3.10 - synthase, ec:2.5.1.58 - farnesyltransferase, ec:2.7.1.36 - kinase, ec:1.1.1.34 - reductase (NADPH), ec:2.1.1.100 - O-methyltransferase, ec:4.1.1.33 - decarboxylase, ec:2.5.1.10 - diphosphate synthase, ec:2.5.1.85 - diphosphate synthase [geranylgeranyl-diphosphate specific], …
TRINITY_DN3250_c0_g2_i8	Aminoacyl-tRNA biosynthesis	map00970	22	ec:6.1.1.22 - ligase, ec:6.1.1.19 - ligase, ec:2.1.2.9 - formyltransferase, ec:6.1.1.9 - ligase, ec:6.1.1.3 - ligase, ec:6.1.1.15 - ligase, ec:6.1.1.5 - ligase, ec:6.1.1.10 - ligase, ec:6.1.1.21 - ligase, ec:6.1.1.18 - ligase, ec:6.1.1.7 - ligase, ec:6.1.1.12 - ligase, ec:6.1.1.2 - ligase, ec:6.3.5.7 - synthase (glutamine-hydrolysing), ec:6.1.1.14 - ligase, ec:6.1.1.4 - ligase, ec:6.1.1.20 - liga…
TRINITY_DN3250_c0_g2_i9	Aminoacyl-tRNA biosynthesis	map00970	22	ec:6.1.1.22 - ligase, ec:6.1.1.19 - ligase, ec:2.1.2.9 - formyltransferase, ec:6.1.1.9 - ligase, ec:6.1.1.3 - ligase, ec:6.1.1.15 - ligase, ec:6.1.1.5 - ligase, ec:6.1.1.10 - ligase, ec:6.1.1.21 - ligase, ec:6.1.1.18 - ligase, ec:6.1.1.7 - ligase, ec:6.1.1.12 - ligase, ec:6.1.1.2 - ligase, ec:6.3.5.7 - synthase (glutamine-hydrolysing), ec:6.1.1.14 - ligase, ec:6.1.1.4 - ligase, ec:6.1.1.20 - liga…
TRINITY_DN9745_c0_g1_i2	Arginine and proline metabolism	map00330	21	ec:2.7.2.11 - 5-kinase, ec:3.5.1.4 - acylamidase, ec:1.5.1.2 - reductase, ec:1.2.1.3 - dehydrogenase (NAD+), ec:1.2.1.41 - dehydrogenase, ec:2.6.1.13 - aminotransferase, ec:1.2.1.19 - dehydrogenase, ec:1.4.3.3 - oxidase, ec:2.5.1.22 - synthase, ec:4.1.1.17 - decarboxylase, ec:1.14.11.2 - 4-dioxygenase, ec:4.1.1.50 - decarboxylase, ec:2.6.1.1 - transaminase, ec:2.3.1.57 - N-acetyltransferase, ec:2…
TRINITY_DN9745_c0_g1_i3	Arginine and proline metabolism	map00330	21	ec:2.7.2.11 - 5-kinase, ec:3.5.1.4 - acylamidase, ec:1.5.1.2 - reductase, ec:1.2.1.3 - dehydrogenase (NAD+), ec:1.2.1.41 - dehydrogenase, ec:2.6.1.13 - aminotransferase, ec:1.2.1.19 - dehydrogenase, ec:1.4.3.3 - oxidase, ec:2.5.1.22 - synthase, ec:4.1.1.17 - decarboxylase, ec:1.14.11.2 - 4-dioxygenase, ec:4.1.1.50 - decarboxylase, ec:2.6.1.1 - transaminase, ec:2.3.1.57 - N-acetyltransferase, ec:2…
TRINITY_DN25456_c1_g1_i1	Glycerophospholipid metabolism	map00564	30	ec:3.1.4.4 - D, ec:2.7.7.15 - cytidylyltransferase, ec:2.3.1.51 - O-acyltransferase, ec:2.7.8.5 - 1-phosphatidyltransferase, ec:2.3.1.23 - O-acyltransferase, ec:2.3.1.42 - O-acyltransferase, ec:2.7.8.11 - 3-phosphatidyltransferase, ec:2.1.1.17 - N-methyltransferase, ec:1.1.1.8 - dehydrogenase (NAD+), ec:4.1.1.65 - decarboxylase, ec:2.7.8.1 - EPT, ec:2.7.7.41 - cytidylyltransferase, ec:2.7.1.107 -…
TRINITY_DN928_c0_g2_i1	Terpenoid backbone biosynthesis	map00900	16	ec:2.7.4.2 - kinase, ec:2.5.1.84 - diphosphate synthase [geranyl-diphosphate specific], ec:1.8.3.5 - oxidase, ec:2.3.3.10 - synthase, ec:2.5.1.58 - farnesyltransferase, ec:2.7.1.36 - kinase, ec:1.1.1.34 - reductase (NADPH), ec:2.1.1.100 - O-methyltransferase, ec:4.1.1.33 - decarboxylase, ec:2.5.1.10 - diphosphate synthase, ec:2.5.1.85 - diphosphate synthase [geranylgeranyl-diphosphate specific], …
TRINITY_DN928_c0_g2_i2	Terpenoid backbone biosynthesis	map00900	16	ec:2.7.4.2 - kinase, ec:2.5.1.84 - diphosphate synthase [geranyl-diphosphate specific], ec:1.8.3.5 - oxidase, ec:2.3.3.10 - synthase, ec:2.5.1.58 - farnesyltransferase, ec:2.7.1.36 - kinase, ec:1.1.1.34 - reductase (NADPH), ec:2.1.1.100 - O-methyltransferase, ec:4.1.1.33 - decarboxylase, ec:2.5.1.10 - diphosphate synthase, ec:2.5.1.85 - diphosphate synthase [geranylgeranyl-diphosphate specific], …
TRINITY_DN928_c0_g2_i4	Terpenoid backbone biosynthesis	map00900	16	ec:2.7.4.2 - kinase, ec:2.5.1.84 - diphosphate synthase [geranyl-diphosphate specific], ec:1.8.3.5 - oxidase, ec:2.3.3.10 - synthase, ec:2.5.1.58 - farnesyltransferase, ec:2.7.1.36 - kinase, ec:1.1.1.34 - reductase (NADPH), ec:2.1.1.100 - O-methyltransferase, ec:4.1.1.33 - decarboxylase, ec:2.5.1.10 - diphosphate synthase, ec:2.5.1.85 - diphosphate synthase [geranylgeranyl-diphosphate specific], …
TRINITY_DN21_c1_g2_i1	Fatty acid elongation	map00062	12	ec:2.3.1.199 - 3-oxoacyl-CoA synthase, ec:1.3.1.38 - reductase (NADPH), ec:1.1.1.35 - dehydrogenase, ec:1.1.1.330 - 3-oxoacyl-CoA reductase, ec:1.3.1.93 - enoyl-CoA reductase, ec:4.2.1.134 - (3R)-3-hydroxyacyl-CoA dehydratase, ec:2.3.1.16 - C-acyltransferase, ec:1.1.1.211 - dehydrogenase, ec:4.2.1.74 - hydratase, ec:4.2.1.17 - hydratase, ec:3.1.2.22 - hydrolase, ec:3.1.2.2 - hydrolase
TRINITY_DN3250_c0_g2_i1	Aminoacyl-tRNA biosynthesis	map00970	22	ec:6.1.1.22 - ligase, ec:6.1.1.19 - ligase, ec:2.1.2.9 - formyltransferase, ec:6.1.1.9 - ligase, ec:6.1.1.3 - ligase, ec:6.1.1.15 - ligase, ec:6.1.1.5 - ligase, ec:6.1.1.10 - ligase, ec:6.1.1.21 - ligase, ec:6.1.1.18 - ligase, ec:6.1.1.7 - ligase, ec:6.1.1.12 - ligase, ec:6.1.1.2 - ligase, ec:6.3.5.7 - synthase (glutamine-hydrolysing), ec:6.1.1.14 - ligase, ec:6.1.1.4 - ligase, ec:6.1.1.20 - liga…
TRINITY_DN3250_c0_g2_i2	Aminoacyl-tRNA biosynthesis	map00970	22	ec:6.1.1.22 - ligase, ec:6.1.1.19 - ligase, ec:2.1.2.9 - formyltransferase, ec:6.1.1.9 - ligase, ec:6.1.1.3 - ligase, ec:6.1.1.15 - ligase, ec:6.1.1.5 - ligase, ec:6.1.1.10 - ligase, ec:6.1.1.21 - ligase, ec:6.1.1.18 - ligase, ec:6.1.1.7 - ligase, ec:6.1.1.12 - ligase, ec:6.1.1.2 - ligase, ec:6.3.5.7 - synthase (glutamine-hydrolysing), ec:6.1.1.14 - ligase, ec:6.1.1.4 - ligase, ec:6.1.1.20 - liga…
TRINITY_DN190435_c0_g1_i1	Purine metabolism	map00230	54	ec:3.6.1.15 - phosphatase, ec:4.6.1.2 - cyclase, ec:3.1.4.35 - phosphodiesterase, ec:3.5.4.10 - cyclohydrolase, ec:3.1.5.1 - deoxy-GTPase, ec:3.6.1.9 - diphosphatase, ec:3.5.4.3 - deaminase, ec:3.6.1.17 - (asymmetrical), ec:1.17.4.1 - reductase, ec:3.6.1.3 - adenylpyrophosphatase, ec:3.1.4.17 - phosphodiesterase, ec:4.3.2.2 - lyase, ec:1.7.1.7 - reductase, ec:1.17.1.4 - dehydrogenase, ec:2.7.7.4 …
TRINITY_DN1900_c0_g1_i19	Other glycan degradation	map00511	9	ec:3.2.1.45 - psychosine hydrolase, ec:3.2.1.51 - alpha-fucosidase, ec:3.2.1.23 - lactase (ambiguous), ec:3.2.1.25 - mannanase, ec:3.5.1.26 - aspartylglucosylamine deaspartylase, ec:3.2.1.96 - endo-beta-N-acetylglucosaminidase, ec:3.2.1.18 - neuraminidase, ec:3.2.1.52 - hexosaminidase, ec:3.2.1.24 - alpha-D-mannosidase
TRINITY_DN3250_c0_g2_i4	Aminoacyl-tRNA biosynthesis	map00970	22	ec:6.1.1.22 - ligase, ec:6.1.1.19 - ligase, ec:2.1.2.9 - formyltransferase, ec:6.1.1.9 - ligase, ec:6.1.1.3 - ligase, ec:6.1.1.15 - ligase, ec:6.1.1.5 - ligase, ec:6.1.1.10 - ligase, ec:6.1.1.21 - ligase, ec:6.1.1.18 - ligase, ec:6.1.1.7 - ligase, ec:6.1.1.12 - ligase, ec:6.1.1.2 - ligase, ec:6.3.5.7 - synthase (glutamine-hydrolysing), ec:6.1.1.14 - ligase, ec:6.1.1.4 - ligase, ec:6.1.1.20 - liga…
TRINITY_DN1900_c0_g1_i16	Other glycan degradation	map00511	9	ec:3.2.1.45 - psychosine hydrolase, ec:3.2.1.51 - alpha-fucosidase, ec:3.2.1.23 - lactase (ambiguous), ec:3.2.1.25 - mannanase, ec:3.5.1.26 - aspartylglucosylamine deaspartylase, ec:3.2.1.96 - endo-beta-N-acetylglucosaminidase, ec:3.2.1.18 - neuraminidase, ec:3.2.1.52 - hexosaminidase, ec:3.2.1.24 - alpha-D-mannosidase
TRINITY_DN1900_c0_g1_i17	Other glycan degradation	map00511	9	ec:3.2.1.45 - psychosine hydrolase, ec:3.2.1.51 - alpha-fucosidase, ec:3.2.1.23 - lactase (ambiguous), ec:3.2.1.25 - mannanase, ec:3.5.1.26 - aspartylglucosylamine deaspartylase, ec:3.2.1.96 - endo-beta-N-acetylglucosaminidase, ec:3.2.1.18 - neuraminidase, ec:3.2.1.52 - hexosaminidase, ec:3.2.1.24 - alpha-D-mannosidase
TRINITY_DN14631_c0_g2_i1	Purine metabolism, Thiamine metabolism	map00230, map00730	54, 7	ec:3.6.1.15 - phosphatase, ec:4.6.1.2 - cyclase, ec:3.1.4.35 - phosphodiesterase, ec:3.5.4.10 - cyclohydrolase, ec:3.1.5.1 - deoxy-GTPase, ec:3.6.1.9 - diphosphatase, ec:3.5.4.3 - deaminase, ec:3.6.1.17 - (asymmetrical), ec:1.17.4.1 - reductase, ec:3.6.1.3 - adenylpyrophosphatase, ec:3.1.4.17 - phosphodiesterase, ec:4.3.2.2 - lyase, ec:1.7.1.7 - reductase, ec:1.17.1.4 - dehydrogenase, ec:2.7.7.4 …
TRINITY_DN1900_c0_g1_i14	Other glycan degradation	map00511	9	ec:3.2.1.45 - psychosine hydrolase, ec:3.2.1.51 - alpha-fucosidase, ec:3.2.1.23 - lactase (ambiguous), ec:3.2.1.25 - mannanase, ec:3.5.1.26 - aspartylglucosylamine deaspartylase, ec:3.2.1.96 - endo-beta-N-acetylglucosaminidase, ec:3.2.1.18 - neuraminidase, ec:3.2.1.52 - hexosaminidase, ec:3.2.1.24 - alpha-D-mannosidase
TRINITY_DN3250_c0_g2_i7	Aminoacyl-tRNA biosynthesis	map00970	22	ec:6.1.1.22 - ligase, ec:6.1.1.19 - ligase, ec:2.1.2.9 - formyltransferase, ec:6.1.1.9 - ligase, ec:6.1.1.3 - ligase, ec:6.1.1.15 - ligase, ec:6.1.1.5 - ligase, ec:6.1.1.10 - ligase, ec:6.1.1.21 - ligase, ec:6.1.1.18 - ligase, ec:6.1.1.7 - ligase, ec:6.1.1.12 - ligase, ec:6.1.1.2 - ligase, ec:6.3.5.7 - synthase (glutamine-hydrolysing), ec:6.1.1.14 - ligase, ec:6.1.1.4 - ligase, ec:6.1.1.20 - liga…
TRINITY_DN1900_c0_g1_i13	Other glycan degradation	map00511	9	ec:3.2.1.45 - psychosine hydrolase, ec:3.2.1.51 - alpha-fucosidase, ec:3.2.1.23 - lactase (ambiguous), ec:3.2.1.25 - mannanase, ec:3.5.1.26 - aspartylglucosylamine deaspartylase, ec:3.2.1.96 - endo-beta-N-acetylglucosaminidase, ec:3.2.1.18 - neuraminidase, ec:3.2.1.52 - hexosaminidase, ec:3.2.1.24 - alpha-D-mannosidase
TRINITY_DN8300_c0_g2_i4	Pyrimidine metabolism, Drug metabolism - other enzymes	map00240, map00983	29, 20	ec:2.7.1.48 - kinase, ec:3.5.2.2 - hydantoinase, ec:1.3.5.2 - dehydrogenase (quinone), ec:3.6.1.9 - diphosphatase, ec:6.3.4.2 - synthase (glutamine hydrolysing), ec:2.1.1.45 - synthase, ec:3.6.1.17 - (asymmetrical), ec:1.17.4.1 - reductase, ec:2.1.3.2 - carbamoyltransferase, ec:2.4.2.10 - phosphoribosyltransferase, ec:3.6.1.12 - diphosphatase, ec:3.5.4.12 - deaminase, ec:3.6.1.23 - diphosphatase,…
TRINITY_DN1900_c0_g1_i10	Other glycan degradation	map00511	9	ec:3.2.1.45 - psychosine hydrolase, ec:3.2.1.51 - alpha-fucosidase, ec:3.2.1.23 - lactase (ambiguous), ec:3.2.1.25 - mannanase, ec:3.5.1.26 - aspartylglucosylamine deaspartylase, ec:3.2.1.96 - endo-beta-N-acetylglucosaminidase, ec:3.2.1.18 - neuraminidase, ec:3.2.1.52 - hexosaminidase, ec:3.2.1.24 - alpha-D-mannosidase
TRINITY_DN8300_c0_g2_i3	Pyrimidine metabolism, Drug metabolism - other enzymes	map00240, map00983	29, 20	ec:2.7.1.48 - kinase, ec:3.5.2.2 - hydantoinase, ec:1.3.5.2 - dehydrogenase (quinone), ec:3.6.1.9 - diphosphatase, ec:6.3.4.2 - synthase (glutamine hydrolysing), ec:2.1.1.45 - synthase, ec:3.6.1.17 - (asymmetrical), ec:1.17.4.1 - reductase, ec:2.1.3.2 - carbamoyltransferase, ec:2.4.2.10 - phosphoribosyltransferase, ec:3.6.1.12 - diphosphatase, ec:3.5.4.12 - deaminase, ec:3.6.1.23 - diphosphatase,…
TRINITY_DN1900_c0_g1_i11	Other glycan degradation	map00511	9	ec:3.2.1.45 - psychosine hydrolase, ec:3.2.1.51 - alpha-fucosidase, ec:3.2.1.23 - lactase (ambiguous), ec:3.2.1.25 - mannanase, ec:3.5.1.26 - aspartylglucosylamine deaspartylase, ec:3.2.1.96 - endo-beta-N-acetylglucosaminidase, ec:3.2.1.18 - neuraminidase, ec:3.2.1.52 - hexosaminidase, ec:3.2.1.24 - alpha-D-mannosidase
TRINITY_DN8300_c0_g2_i5	Pyrimidine metabolism, Drug metabolism - other enzymes	map00240, map00983	29, 20	ec:2.7.1.48 - kinase, ec:3.5.2.2 - hydantoinase, ec:1.3.5.2 - dehydrogenase (quinone), ec:3.6.1.9 - diphosphatase, ec:6.3.4.2 - synthase (glutamine hydrolysing), ec:2.1.1.45 - synthase, ec:3.6.1.17 - (asymmetrical), ec:1.17.4.1 - reductase, ec:2.1.3.2 - carbamoyltransferase, ec:2.4.2.10 - phosphoribosyltransferase, ec:3.6.1.12 - diphosphatase, ec:3.5.4.12 - deaminase, ec:3.6.1.23 - diphosphatase,…
TRINITY_DN2041_c0_g3_i1	Oxidative phosphorylation	map00190	5	ec:3.6.1.1 - diphosphatase, ec:1.3.5.1 - dehydrogenase, ec:7.1.2.1 - H+-exporting transporter, ec:1.6.99.3 - dehydrogenase, ec:7.1.1.2 - reductase (H+-translocating)
TRINITY_DN138853_c0_g1_i2	Toluene degradation, Biosynthesis of unsaturated fatty acids, Carbon fixation pathways in prokaryotes, Valine, leucine and isoleucine degradation, Fatty acid degradation, Tryptophan metabolism, Lysine degradation, Caprolactam degradation, Geraniol degradation, alpha-Linolenic acid metabolism, Ethylbenzene degradation, Benzoate degradation, Fatty acid elongation, Butanoate metabolism	map00623, map01040, map00720, map00280, map00071, map00380, map00310, map00930, map00281, map00592, map00642, map00362, map00062, map00650	1, 9, 21, 22, 13, 17, 18, 3, 4, 6, 1, 4, 12, 13	ec:1.1.1.35 - dehydrogenase, ec:2.3.1.199 - 3-oxoacyl-CoA synthase, ec:1.14.19.1 - 9-desaturase, ec:1.1.1.330 - 3-oxoacyl-CoA reductase, ec:1.3.1.93 - enoyl-CoA reductase, ec:1.3.3.6 - oxidase, ec:4.2.1.134 - (3R)-3-hydroxyacyl-CoA dehydratase, ec:2.3.1.16 - C-acyltransferase, ec:2.3.1.176 - C-acyltransferase, ec:3.1.2.2 - hydrolase, ec:1.1.1.35 - dehydrogenase, ec:6.2.1.1 - ligase, ec:6.4.1.3 - …
TRINITY_DN219066_c0_g1_i1	mTOR signaling pathway	map04150	3	ec:2.7.11.11 - protein kinase, ec:2.7.1.153 - 3-kinase, ec:2.7.11.24 - protein kinase
TRINITY_DN9745_c0_g1_i4	Purine metabolism, Thiamine metabolism	map00230, map00730	54, 7	ec:3.6.1.15 - phosphatase, ec:4.6.1.2 - cyclase, ec:3.1.4.35 - phosphodiesterase, ec:3.5.4.10 - cyclohydrolase, ec:3.1.5.1 - deoxy-GTPase, ec:3.6.1.9 - diphosphatase, ec:3.5.4.3 - deaminase, ec:3.6.1.17 - (asymmetrical), ec:1.17.4.1 - reductase, ec:3.6.1.3 - adenylpyrophosphatase, ec:3.1.4.17 - phosphodiesterase, ec:4.3.2.2 - lyase, ec:1.7.1.7 - reductase, ec:1.17.1.4 - dehydrogenase, ec:2.7.7.4 …
TRINITY_DN9745_c0_g1_i5	Arginine and proline metabolism	map00330	21	ec:2.7.2.11 - 5-kinase, ec:3.5.1.4 - acylamidase, ec:1.5.1.2 - reductase, ec:1.2.1.3 - dehydrogenase (NAD+), ec:1.2.1.41 - dehydrogenase, ec:2.6.1.13 - aminotransferase, ec:1.2.1.19 - dehydrogenase, ec:1.4.3.3 - oxidase, ec:2.5.1.22 - synthase, ec:4.1.1.17 - decarboxylase, ec:1.14.11.2 - 4-dioxygenase, ec:4.1.1.50 - decarboxylase, ec:2.6.1.1 - transaminase, ec:2.3.1.57 - N-acetyltransferase, ec:2…
TRINITY_DN63502_c0_g1_i1	Purine metabolism, Thiamine metabolism	map00230, map00730	54, 7	ec:3.6.1.15 - phosphatase, ec:4.6.1.2 - cyclase, ec:3.1.4.35 - phosphodiesterase, ec:3.5.4.10 - cyclohydrolase, ec:3.1.5.1 - deoxy-GTPase, ec:3.6.1.9 - diphosphatase, ec:3.5.4.3 - deaminase, ec:3.6.1.17 - (asymmetrical), ec:1.17.4.1 - reductase, ec:3.6.1.3 - adenylpyrophosphatase, ec:3.1.4.17 - phosphodiesterase, ec:4.3.2.2 - lyase, ec:1.7.1.7 - reductase, ec:1.17.1.4 - dehydrogenase, ec:2.7.7.4 …
TRINITY_DN16920_c1_g1_i1	Purine metabolism, Thiamine metabolism	map00230, map00730	54, 7	ec:3.6.1.15 - phosphatase, ec:4.6.1.2 - cyclase, ec:3.1.4.35 - phosphodiesterase, ec:3.5.4.10 - cyclohydrolase, ec:3.1.5.1 - deoxy-GTPase, ec:3.6.1.9 - diphosphatase, ec:3.5.4.3 - deaminase, ec:3.6.1.17 - (asymmetrical), ec:1.17.4.1 - reductase, ec:3.6.1.3 - adenylpyrophosphatase, ec:3.1.4.17 - phosphodiesterase, ec:4.3.2.2 - lyase, ec:1.7.1.7 - reductase, ec:1.17.1.4 - dehydrogenase, ec:2.7.7.4 …
TRINITY_DN26315_c1_g1_i1	Other glycan degradation	map00511	9	ec:3.2.1.45 - psychosine hydrolase, ec:3.2.1.51 - alpha-fucosidase, ec:3.2.1.23 - lactase (ambiguous), ec:3.2.1.25 - mannanase, ec:3.5.1.26 - aspartylglucosylamine deaspartylase, ec:3.2.1.96 - endo-beta-N-acetylglucosaminidase, ec:3.2.1.18 - neuraminidase, ec:3.2.1.52 - hexosaminidase, ec:3.2.1.24 - alpha-D-mannosidase
TRINITY_DN142863_c0_g1_i2	Sphingolipid metabolism	map00600	18	ec:2.7.1.138 - kinase, ec:3.2.1.45 - psychosine hydrolase, ec:2.7.8.27 - synthase, ec:3.1.4.12 - phosphodiesterase, ec:3.1.6.1 - sulfatase, ec:3.2.1.23 - lactase (ambiguous), ec:3.2.1.22 - melibiase, ec:2.3.1.50 - C-palmitoyltransferase, ec:3.5.1.23 - acylsphingosine deacylase, ec:3.2.1.46 - cerebroside galactosidase, ec:2.3.1.24 - N-acyltransferase, ec:3.1.4.41 - phosphodiesterase D, ec:3.1.3.4 …
TRINITY_DN9438_c0_g1_i3	Purine metabolism, Thiamine metabolism	map00230, map00730	54, 7	ec:3.6.1.15 - phosphatase, ec:4.6.1.2 - cyclase, ec:3.1.4.35 - phosphodiesterase, ec:3.5.4.10 - cyclohydrolase, ec:3.1.5.1 - deoxy-GTPase, ec:3.6.1.9 - diphosphatase, ec:3.5.4.3 - deaminase, ec:3.6.1.17 - (asymmetrical), ec:1.17.4.1 - reductase, ec:3.6.1.3 - adenylpyrophosphatase, ec:3.1.4.17 - phosphodiesterase, ec:4.3.2.2 - lyase, ec:1.7.1.7 - reductase, ec:1.17.1.4 - dehydrogenase, ec:2.7.7.4 …
TRINITY_DN9438_c0_g1_i2	Purine metabolism, Thiamine metabolism	map00230, map00730	54, 7	ec:3.6.1.15 - phosphatase, ec:4.6.1.2 - cyclase, ec:3.1.4.35 - phosphodiesterase, ec:3.5.4.10 - cyclohydrolase, ec:3.1.5.1 - deoxy-GTPase, ec:3.6.1.9 - diphosphatase, ec:3.5.4.3 - deaminase, ec:3.6.1.17 - (asymmetrical), ec:1.17.4.1 - reductase, ec:3.6.1.3 - adenylpyrophosphatase, ec:3.1.4.17 - phosphodiesterase, ec:4.3.2.2 - lyase, ec:1.7.1.7 - reductase, ec:1.17.1.4 - dehydrogenase, ec:2.7.7.4 …
TRINITY_DN9438_c0_g1_i1	Purine metabolism, Thiamine metabolism	map00230, map00730	54, 7	ec:3.6.1.15 - phosphatase, ec:4.6.1.2 - cyclase, ec:3.1.4.35 - phosphodiesterase, ec:3.5.4.10 - cyclohydrolase, ec:3.1.5.1 - deoxy-GTPase, ec:3.6.1.9 - diphosphatase, ec:3.5.4.3 - deaminase, ec:3.6.1.17 - (asymmetrical), ec:1.17.4.1 - reductase, ec:3.6.1.3 - adenylpyrophosphatase, ec:3.1.4.17 - phosphodiesterase, ec:4.3.2.2 - lyase, ec:1.7.1.7 - reductase, ec:1.17.1.4 - dehydrogenase, ec:2.7.7.4 …
TRINITY_DN6670_c0_g2_i4	mTOR signaling pathway	map04150	3	ec:2.7.11.11 - protein kinase, ec:2.7.1.153 - 3-kinase, ec:2.7.11.24 - protein kinase
TRINITY_DN237003_c0_g1_i1	Purine metabolism, Thiamine metabolism	map00230, map00730	54, 7	ec:3.6.1.15 - phosphatase, ec:4.6.1.2 - cyclase, ec:3.1.4.35 - phosphodiesterase, ec:3.5.4.10 - cyclohydrolase, ec:3.1.5.1 - deoxy-GTPase, ec:3.6.1.9 - diphosphatase, ec:3.5.4.3 - deaminase, ec:3.6.1.17 - (asymmetrical), ec:1.17.4.1 - reductase, ec:3.6.1.3 - adenylpyrophosphatase, ec:3.1.4.17 - phosphodiesterase, ec:4.3.2.2 - lyase, ec:1.7.1.7 - reductase, ec:1.17.1.4 - dehydrogenase, ec:2.7.7.4 …
TRINITY_DN6670_c0_g2_i3	Drug metabolism - other enzymes, Glycerophospholipid metabolism	map00983, map00564	20, 30	ec:2.7.1.48 - kinase, ec:3.5.2.2 - hydantoinase, ec:3.1.1.1 - ali-esterase, ec:1.17.4.1 - reductase, ec:2.4.2.10 - phosphoribosyltransferase, ec:3.2.1.31 - beta-glucuronide glucuronohydrolase glucuronidase, ec:3.6.1.23 - diphosphatase, ec:3.5.4.5 - deaminase, ec:6.3.5.2 - synthase (glutamine-hydrolysing), ec:2.3.1.5 - N-acetyltransferase, ec:2.4.1.17 - 1-naphthol glucuronyltransferase, ec:2.4.2.8…
TRINITY_DN4330_c0_g2_i1	Purine metabolism, Thiamine metabolism	map00230, map00730	54, 7	ec:3.6.1.15 - phosphatase, ec:4.6.1.2 - cyclase, ec:3.1.4.35 - phosphodiesterase, ec:3.5.4.10 - cyclohydrolase, ec:3.1.5.1 - deoxy-GTPase, ec:3.6.1.9 - diphosphatase, ec:3.5.4.3 - deaminase, ec:3.6.1.17 - (asymmetrical), ec:1.17.4.1 - reductase, ec:3.6.1.3 - adenylpyrophosphatase, ec:3.1.4.17 - phosphodiesterase, ec:4.3.2.2 - lyase, ec:1.7.1.7 - reductase, ec:1.17.1.4 - dehydrogenase, ec:2.7.7.4 …
TRINITY_DN4695_c0_g1_i1	Tryptophan metabolism	map00380	17	ec:3.5.1.4 - acylamidase, ec:1.2.1.3 - dehydrogenase (NAD+), ec:1.1.1.35 - dehydrogenase, ec:1.14.16.4 - 5-monooxygenase, ec:1.2.4.2 - dehydrogenase (succinyl-transferring), ec:2.3.1.61 - succinyltransferase, ec:1.8.1.4 - dehydrogenase, ec:4.1.1.45 - decarboxylase, ec:3.7.1.3 - ec:3.7.1.3 kynureninase, ec:1.13.11.6 - 3,4-dioxygenase, ec:1.14.13.9 - 3-monooxygenase, ec:2.6.1.7 - transaminase, ec:2…
TRINITY_DN4045_c0_g6_i1	Tyrosine metabolism, Tropane, piperidine and pyridine alkaloid biosynthesis, Glycine, serine and threonine metabolism, Phenylalanine metabolism, beta-Alanine metabolism, Isoquinoline alkaloid biosynthesis	map00350, map00960, map00260, map00360, map00410, map00950	12, 2, 30, 9, 12, 3	ec:5.3.2.1 - tautomerase, ec:2.1.1.6 - O-methyltransferase, ec:1.2.1.5 - dehydrogenase [NAD(P)+], ec:1.4.3.21 - oxidase, ec:1.13.11.27 - dioxygenase, ec:1.2.1.16 - dehydrogenase [NAD(P)+], ec:2.6.1.1 - transaminase, ec:5.3.3.12 - isomerase, ec:3.7.1.2 - beta-diketonase, ec:1.1.1.1 - dehydrogenase, ec:1.13.11.5 - 1,2-dioxygenase, ec:1.4.3.2 - oxidase, ec:1.4.3.21 - oxidase, ec:2.6.1.1 - transamina…
TRINITY_DN32855_c0_g2_i1	Purine metabolism, Thiamine metabolism	map00230, map00730	54, 7	ec:3.6.1.15 - phosphatase, ec:4.6.1.2 - cyclase, ec:3.1.4.35 - phosphodiesterase, ec:3.5.4.10 - cyclohydrolase, ec:3.1.5.1 - deoxy-GTPase, ec:3.6.1.9 - diphosphatase, ec:3.5.4.3 - deaminase, ec:3.6.1.17 - (asymmetrical), ec:1.17.4.1 - reductase, ec:3.6.1.3 - adenylpyrophosphatase, ec:3.1.4.17 - phosphodiesterase, ec:4.3.2.2 - lyase, ec:1.7.1.7 - reductase, ec:1.17.1.4 - dehydrogenase, ec:2.7.7.4 …
TRINITY_DN4695_c0_g1_i6	Tryptophan metabolism	map00380	17	ec:3.5.1.4 - acylamidase, ec:1.2.1.3 - dehydrogenase (NAD+), ec:1.1.1.35 - dehydrogenase, ec:1.14.16.4 - 5-monooxygenase, ec:1.2.4.2 - dehydrogenase (succinyl-transferring), ec:2.3.1.61 - succinyltransferase, ec:1.8.1.4 - dehydrogenase, ec:4.1.1.45 - decarboxylase, ec:3.7.1.3 - ec:3.7.1.3 kynureninase, ec:1.13.11.6 - 3,4-dioxygenase, ec:1.14.13.9 - 3-monooxygenase, ec:2.6.1.7 - transaminase, ec:2…
TRINITY_DN495_c0_g1_i12	Terpenoid backbone biosynthesis	map00900	16	ec:2.7.4.2 - kinase, ec:2.5.1.84 - diphosphate synthase [geranyl-diphosphate specific], ec:1.8.3.5 - oxidase, ec:2.3.3.10 - synthase, ec:2.5.1.58 - farnesyltransferase, ec:2.7.1.36 - kinase, ec:1.1.1.34 - reductase (NADPH), ec:2.1.1.100 - O-methyltransferase, ec:4.1.1.33 - decarboxylase, ec:2.5.1.10 - diphosphate synthase, ec:2.5.1.85 - diphosphate synthase [geranylgeranyl-diphosphate specific], …
TRINITY_DN495_c0_g1_i11	Terpenoid backbone biosynthesis	map00900	16	ec:2.7.4.2 - kinase, ec:2.5.1.84 - diphosphate synthase [geranyl-diphosphate specific], ec:1.8.3.5 - oxidase, ec:2.3.3.10 - synthase, ec:2.5.1.58 - farnesyltransferase, ec:2.7.1.36 - kinase, ec:1.1.1.34 - reductase (NADPH), ec:2.1.1.100 - O-methyltransferase, ec:4.1.1.33 - decarboxylase, ec:2.5.1.10 - diphosphate synthase, ec:2.5.1.85 - diphosphate synthase [geranylgeranyl-diphosphate specific], …
TRINITY_DN26315_c0_g1_i1	Other glycan degradation	map00511	9	ec:3.2.1.45 - psychosine hydrolase, ec:3.2.1.51 - alpha-fucosidase, ec:3.2.1.23 - lactase (ambiguous), ec:3.2.1.25 - mannanase, ec:3.5.1.26 - aspartylglucosylamine deaspartylase, ec:3.2.1.96 - endo-beta-N-acetylglucosaminidase, ec:3.2.1.18 - neuraminidase, ec:3.2.1.52 - hexosaminidase, ec:3.2.1.24 - alpha-D-mannosidase
TRINITY_DN8560_c0_g1_i3	Purine metabolism, Thiamine metabolism	map00230, map00730	54, 7	ec:3.6.1.15 - phosphatase, ec:4.6.1.2 - cyclase, ec:3.1.4.35 - phosphodiesterase, ec:3.5.4.10 - cyclohydrolase, ec:3.1.5.1 - deoxy-GTPase, ec:3.6.1.9 - diphosphatase, ec:3.5.4.3 - deaminase, ec:3.6.1.17 - (asymmetrical), ec:1.17.4.1 - reductase, ec:3.6.1.3 - adenylpyrophosphatase, ec:3.1.4.17 - phosphodiesterase, ec:4.3.2.2 - lyase, ec:1.7.1.7 - reductase, ec:1.17.1.4 - dehydrogenase, ec:2.7.7.4 …
TRINITY_DN9168_c0_g1_i1	Phenylpropanoid biosynthesis	map00940	2	ec:1.11.1.7 - lactoperoxidase, ec:3.2.1.21 - gentiobiase
TRINITY_DN50889_c0_g1_i2	Purine metabolism, Thiamine metabolism	map00230, map00730	54, 7	ec:3.6.1.15 - phosphatase, ec:4.6.1.2 - cyclase, ec:3.1.4.35 - phosphodiesterase, ec:3.5.4.10 - cyclohydrolase, ec:3.1.5.1 - deoxy-GTPase, ec:3.6.1.9 - diphosphatase, ec:3.5.4.3 - deaminase, ec:3.6.1.17 - (asymmetrical), ec:1.17.4.1 - reductase, ec:3.6.1.3 - adenylpyrophosphatase, ec:3.1.4.17 - phosphodiesterase, ec:4.3.2.2 - lyase, ec:1.7.1.7 - reductase, ec:1.17.1.4 - dehydrogenase, ec:2.7.7.4 …
TRINITY_DN50889_c0_g1_i1	Purine metabolism, Thiamine metabolism	map00230, map00730	54, 7	ec:3.6.1.15 - phosphatase, ec:4.6.1.2 - cyclase, ec:3.1.4.35 - phosphodiesterase, ec:3.5.4.10 - cyclohydrolase, ec:3.1.5.1 - deoxy-GTPase, ec:3.6.1.9 - diphosphatase, ec:3.5.4.3 - deaminase, ec:3.6.1.17 - (asymmetrical), ec:1.17.4.1 - reductase, ec:3.6.1.3 - adenylpyrophosphatase, ec:3.1.4.17 - phosphodiesterase, ec:4.3.2.2 - lyase, ec:1.7.1.7 - reductase, ec:1.17.1.4 - dehydrogenase, ec:2.7.7.4 …
TRINITY_DN4511_c0_g1_i4	T cell receptor signaling pathway, PD-L1 expression and PD-1 checkpoint pathway in cancer, Th1 and Th2 cell differentiation	map04660, map05235, map04658	2, 1, 1	ec:2.7.10.2 - protein-tyrosine kinase, ec:3.1.3.16 - phosphatase, ec:3.1.3.16 - phosphatase, ec:3.1.3.16 - phosphatase
TRINITY_DN4511_c0_g1_i2	T cell receptor signaling pathway, PD-L1 expression and PD-1 checkpoint pathway in cancer, Th1 and Th2 cell differentiation	map04660, map05235, map04658	2, 1, 1	ec:2.7.10.2 - protein-tyrosine kinase, ec:3.1.3.16 - phosphatase, ec:3.1.3.16 - phosphatase, ec:3.1.3.16 - phosphatase
TRINITY_DN4511_c0_g1_i3	T cell receptor signaling pathway, PD-L1 expression and PD-1 checkpoint pathway in cancer, Th1 and Th2 cell differentiation	map04660, map05235, map04658	2, 1, 1	ec:2.7.10.2 - protein-tyrosine kinase, ec:3.1.3.16 - phosphatase, ec:3.1.3.16 - phosphatase, ec:3.1.3.16 - phosphatase
TRINITY_DN2752_c0_g1_i9	T cell receptor signaling pathway, PD-L1 expression and PD-1 checkpoint pathway in cancer, Th1 and Th2 cell differentiation	map04660, map05235, map04658	2, 1, 1	ec:2.7.10.2 - protein-tyrosine kinase, ec:3.1.3.16 - phosphatase, ec:3.1.3.16 - phosphatase, ec:3.1.3.16 - phosphatase
TRINITY_DN4511_c0_g1_i1	T cell receptor signaling pathway, PD-L1 expression and PD-1 checkpoint pathway in cancer, Th1 and Th2 cell differentiation	map04660, map05235, map04658	2, 1, 1	ec:2.7.10.2 - protein-tyrosine kinase, ec:3.1.3.16 - phosphatase, ec:3.1.3.16 - phosphatase, ec:3.1.3.16 - phosphatase
TRINITY_DN2752_c0_g1_i8	T cell receptor signaling pathway, PD-L1 expression and PD-1 checkpoint pathway in cancer, Th1 and Th2 cell differentiation	map04660, map05235, map04658	2, 1, 1	ec:2.7.10.2 - protein-tyrosine kinase, ec:3.1.3.16 - phosphatase, ec:3.1.3.16 - phosphatase, ec:3.1.3.16 - phosphatase
TRINITY_DN4698_c0_g1_i6	Purine metabolism, Thiamine metabolism	map00230, map00730	54, 7	ec:3.6.1.15 - phosphatase, ec:4.6.1.2 - cyclase, ec:3.1.4.35 - phosphodiesterase, ec:3.5.4.10 - cyclohydrolase, ec:3.1.5.1 - deoxy-GTPase, ec:3.6.1.9 - diphosphatase, ec:3.5.4.3 - deaminase, ec:3.6.1.17 - (asymmetrical), ec:1.17.4.1 - reductase, ec:3.6.1.3 - adenylpyrophosphatase, ec:3.1.4.17 - phosphodiesterase, ec:4.3.2.2 - lyase, ec:1.7.1.7 - reductase, ec:1.17.1.4 - dehydrogenase, ec:2.7.7.4 …
TRINITY_DN2752_c0_g1_i6	T cell receptor signaling pathway, PD-L1 expression and PD-1 checkpoint pathway in cancer, Th1 and Th2 cell differentiation	map04660, map05235, map04658	2, 1, 1	ec:2.7.10.2 - protein-tyrosine kinase, ec:3.1.3.16 - phosphatase, ec:3.1.3.16 - phosphatase, ec:3.1.3.16 - phosphatase
TRINITY_DN2752_c0_g1_i5	T cell receptor signaling pathway, PD-L1 expression and PD-1 checkpoint pathway in cancer, Th1 and Th2 cell differentiation	map04660, map05235, map04658	2, 1, 1	ec:2.7.10.2 - protein-tyrosine kinase, ec:3.1.3.16 - phosphatase, ec:3.1.3.16 - phosphatase, ec:3.1.3.16 - phosphatase
TRINITY_DN4698_c0_g1_i4	Purine metabolism, Thiamine metabolism	map00230, map00730	54, 7	ec:3.6.1.15 - phosphatase, ec:4.6.1.2 - cyclase, ec:3.1.4.35 - phosphodiesterase, ec:3.5.4.10 - cyclohydrolase, ec:3.1.5.1 - deoxy-GTPase, ec:3.6.1.9 - diphosphatase, ec:3.5.4.3 - deaminase, ec:3.6.1.17 - (asymmetrical), ec:1.17.4.1 - reductase, ec:3.6.1.3 - adenylpyrophosphatase, ec:3.1.4.17 - phosphodiesterase, ec:4.3.2.2 - lyase, ec:1.7.1.7 - reductase, ec:1.17.1.4 - dehydrogenase, ec:2.7.7.4 …
TRINITY_DN2752_c0_g1_i4	T cell receptor signaling pathway, PD-L1 expression and PD-1 checkpoint pathway in cancer, Th1 and Th2 cell differentiation	map04660, map05235, map04658	2, 1, 1	ec:2.7.10.2 - protein-tyrosine kinase, ec:3.1.3.16 - phosphatase, ec:3.1.3.16 - phosphatase, ec:3.1.3.16 - phosphatase
TRINITY_DN2752_c0_g1_i3	T cell receptor signaling pathway, PD-L1 expression and PD-1 checkpoint pathway in cancer, Th1 and Th2 cell differentiation	map04660, map05235, map04658	2, 1, 1	ec:2.7.10.2 - protein-tyrosine kinase, ec:3.1.3.16 - phosphatase, ec:3.1.3.16 - phosphatase, ec:3.1.3.16 - phosphatase
TRINITY_DN2752_c0_g1_i2	T cell receptor signaling pathway, PD-L1 expression and PD-1 checkpoint pathway in cancer, Th1 and Th2 cell differentiation	map04660, map05235, map04658	2, 1, 1	ec:2.7.10.2 - protein-tyrosine kinase, ec:3.1.3.16 - phosphatase, ec:3.1.3.16 - phosphatase, ec:3.1.3.16 - phosphatase
TRINITY_DN2752_c0_g1_i1	T cell receptor signaling pathway, PD-L1 expression and PD-1 checkpoint pathway in cancer, Th1 and Th2 cell differentiation	map04660, map05235, map04658	2, 1, 1	ec:2.7.10.2 - protein-tyrosine kinase, ec:3.1.3.16 - phosphatase, ec:3.1.3.16 - phosphatase, ec:3.1.3.16 - phosphatase
TRINITY_DN9114_c0_g1_i2	Purine metabolism	map00230	54	ec:3.6.1.15 - phosphatase, ec:4.6.1.2 - cyclase, ec:3.1.4.35 - phosphodiesterase, ec:3.5.4.10 - cyclohydrolase, ec:3.1.5.1 - deoxy-GTPase, ec:3.6.1.9 - diphosphatase, ec:3.5.4.3 - deaminase, ec:3.6.1.17 - (asymmetrical), ec:1.17.4.1 - reductase, ec:3.6.1.3 - adenylpyrophosphatase, ec:3.1.4.17 - phosphodiesterase, ec:4.3.2.2 - lyase, ec:1.7.1.7 - reductase, ec:1.17.1.4 - dehydrogenase, ec:2.7.7.4 …
TRINITY_DN275595_c0_g1_i1	Purine metabolism, Thiamine metabolism	map00230, map00730	54, 7	ec:3.6.1.15 - phosphatase, ec:4.6.1.2 - cyclase, ec:3.1.4.35 - phosphodiesterase, ec:3.5.4.10 - cyclohydrolase, ec:3.1.5.1 - deoxy-GTPase, ec:3.6.1.9 - diphosphatase, ec:3.5.4.3 - deaminase, ec:3.6.1.17 - (asymmetrical), ec:1.17.4.1 - reductase, ec:3.6.1.3 - adenylpyrophosphatase, ec:3.1.4.17 - phosphodiesterase, ec:4.3.2.2 - lyase, ec:1.7.1.7 - reductase, ec:1.17.1.4 - dehydrogenase, ec:2.7.7.4 …
TRINITY_DN49116_c0_g2_i16	Purine metabolism, Thiamine metabolism	map00230, map00730	54, 7	ec:3.6.1.15 - phosphatase, ec:4.6.1.2 - cyclase, ec:3.1.4.35 - phosphodiesterase, ec:3.5.4.10 - cyclohydrolase, ec:3.1.5.1 - deoxy-GTPase, ec:3.6.1.9 - diphosphatase, ec:3.5.4.3 - deaminase, ec:3.6.1.17 - (asymmetrical), ec:1.17.4.1 - reductase, ec:3.6.1.3 - adenylpyrophosphatase, ec:3.1.4.17 - phosphodiesterase, ec:4.3.2.2 - lyase, ec:1.7.1.7 - reductase, ec:1.17.1.4 - dehydrogenase, ec:2.7.7.4 …
TRINITY_DN9114_c0_g1_i7	Purine metabolism	map00230	54	ec:3.6.1.15 - phosphatase, ec:4.6.1.2 - cyclase, ec:3.1.4.35 - phosphodiesterase, ec:3.5.4.10 - cyclohydrolase, ec:3.1.5.1 - deoxy-GTPase, ec:3.6.1.9 - diphosphatase, ec:3.5.4.3 - deaminase, ec:3.6.1.17 - (asymmetrical), ec:1.17.4.1 - reductase, ec:3.6.1.3 - adenylpyrophosphatase, ec:3.1.4.17 - phosphodiesterase, ec:4.3.2.2 - lyase, ec:1.7.1.7 - reductase, ec:1.17.1.4 - dehydrogenase, ec:2.7.7.4 …
TRINITY_DN9114_c0_g1_i6	Purine metabolism, Thiamine metabolism	map00230, map00730	54, 7	ec:3.6.1.15 - phosphatase, ec:4.6.1.2 - cyclase, ec:3.1.4.35 - phosphodiesterase, ec:3.5.4.10 - cyclohydrolase, ec:3.1.5.1 - deoxy-GTPase, ec:3.6.1.9 - diphosphatase, ec:3.5.4.3 - deaminase, ec:3.6.1.17 - (asymmetrical), ec:1.17.4.1 - reductase, ec:3.6.1.3 - adenylpyrophosphatase, ec:3.1.4.17 - phosphodiesterase, ec:4.3.2.2 - lyase, ec:1.7.1.7 - reductase, ec:1.17.1.4 - dehydrogenase, ec:2.7.7.4 …
TRINITY_DN2048_c0_g1_i17	Drug metabolism - other enzymes, Nitrotoluene degradation, Caffeine metabolism	map00983, map00633, map00232	20, 1, 3	ec:2.7.1.48 - kinase, ec:3.5.2.2 - hydantoinase, ec:3.1.1.1 - ali-esterase, ec:1.17.4.1 - reductase, ec:2.4.2.10 - phosphoribosyltransferase, ec:3.2.1.31 - beta-glucuronide glucuronohydrolase glucuronidase, ec:3.6.1.23 - diphosphatase, ec:3.5.4.5 - deaminase, ec:6.3.5.2 - synthase (glutamine-hydrolysing), ec:2.3.1.5 - N-acetyltransferase, ec:2.4.1.17 - 1-naphthol glucuronyltransferase, ec:2.4.2.8…
TRINITY_DN2048_c0_g1_i19	Drug metabolism - other enzymes, Nitrotoluene degradation, Caffeine metabolism	map00983, map00633, map00232	20, 1, 3	ec:2.7.1.48 - kinase, ec:3.5.2.2 - hydantoinase, ec:3.1.1.1 - ali-esterase, ec:1.17.4.1 - reductase, ec:2.4.2.10 - phosphoribosyltransferase, ec:3.2.1.31 - beta-glucuronide glucuronohydrolase glucuronidase, ec:3.6.1.23 - diphosphatase, ec:3.5.4.5 - deaminase, ec:6.3.5.2 - synthase (glutamine-hydrolysing), ec:2.3.1.5 - N-acetyltransferase, ec:2.4.1.17 - 1-naphthol glucuronyltransferase, ec:2.4.2.8…
TRINITY_DN2048_c0_g1_i18	Drug metabolism - other enzymes, Nitrotoluene degradation, Caffeine metabolism	map00983, map00633, map00232	20, 1, 3	ec:2.7.1.48 - kinase, ec:3.5.2.2 - hydantoinase, ec:3.1.1.1 - ali-esterase, ec:1.17.4.1 - reductase, ec:2.4.2.10 - phosphoribosyltransferase, ec:3.2.1.31 - beta-glucuronide glucuronohydrolase glucuronidase, ec:3.6.1.23 - diphosphatase, ec:3.5.4.5 - deaminase, ec:6.3.5.2 - synthase (glutamine-hydrolysing), ec:2.3.1.5 - N-acetyltransferase, ec:2.4.1.17 - 1-naphthol glucuronyltransferase, ec:2.4.2.8…
TRINITY_DN2048_c0_g1_i13	Drug metabolism - other enzymes, Nitrotoluene degradation, Caffeine metabolism	map00983, map00633, map00232	20, 1, 3	ec:2.7.1.48 - kinase, ec:3.5.2.2 - hydantoinase, ec:3.1.1.1 - ali-esterase, ec:1.17.4.1 - reductase, ec:2.4.2.10 - phosphoribosyltransferase, ec:3.2.1.31 - beta-glucuronide glucuronohydrolase glucuronidase, ec:3.6.1.23 - diphosphatase, ec:3.5.4.5 - deaminase, ec:6.3.5.2 - synthase (glutamine-hydrolysing), ec:2.3.1.5 - N-acetyltransferase, ec:2.4.1.17 - 1-naphthol glucuronyltransferase, ec:2.4.2.8…
TRINITY_DN2048_c0_g1_i12	Drug metabolism - other enzymes, Nitrotoluene degradation, Caffeine metabolism	map00983, map00633, map00232	20, 1, 3	ec:2.7.1.48 - kinase, ec:3.5.2.2 - hydantoinase, ec:3.1.1.1 - ali-esterase, ec:1.17.4.1 - reductase, ec:2.4.2.10 - phosphoribosyltransferase, ec:3.2.1.31 - beta-glucuronide glucuronohydrolase glucuronidase, ec:3.6.1.23 - diphosphatase, ec:3.5.4.5 - deaminase, ec:6.3.5.2 - synthase (glutamine-hydrolysing), ec:2.3.1.5 - N-acetyltransferase, ec:2.4.1.17 - 1-naphthol glucuronyltransferase, ec:2.4.2.8…
TRINITY_DN2048_c0_g1_i14	Drug metabolism - other enzymes, Nitrotoluene degradation, Caffeine metabolism	map00983, map00633, map00232	20, 1, 3	ec:2.7.1.48 - kinase, ec:3.5.2.2 - hydantoinase, ec:3.1.1.1 - ali-esterase, ec:1.17.4.1 - reductase, ec:2.4.2.10 - phosphoribosyltransferase, ec:3.2.1.31 - beta-glucuronide glucuronohydrolase glucuronidase, ec:3.6.1.23 - diphosphatase, ec:3.5.4.5 - deaminase, ec:6.3.5.2 - synthase (glutamine-hydrolysing), ec:2.3.1.5 - N-acetyltransferase, ec:2.4.1.17 - 1-naphthol glucuronyltransferase, ec:2.4.2.8…
TRINITY_DN2895_c0_g2_i1	Nitrogen metabolism	map00910	7	ec:4.2.1.1 - anhydrase, ec:1.4.1.2 - dehydrogenase, ec:6.3.1.2 - synthetase, ec:1.7.1.4 - reductase [NAD(P)H], ec:1.7.2.1 - reductase (NO-forming), ec:1.18.6.1 - reduced ferredoxin:dinitrogen oxidoreductase (ATP-hydrolysing), ec:1.4.1.3 - dehydrogenase [NAD(P)+]
TRINITY_DN2048_c0_g1_i10	Drug metabolism - other enzymes, Nitrotoluene degradation, Caffeine metabolism	map00983, map00633, map00232	20, 1, 3	ec:2.7.1.48 - kinase, ec:3.5.2.2 - hydantoinase, ec:3.1.1.1 - ali-esterase, ec:1.17.4.1 - reductase, ec:2.4.2.10 - phosphoribosyltransferase, ec:3.2.1.31 - beta-glucuronide glucuronohydrolase glucuronidase, ec:3.6.1.23 - diphosphatase, ec:3.5.4.5 - deaminase, ec:6.3.5.2 - synthase (glutamine-hydrolysing), ec:2.3.1.5 - N-acetyltransferase, ec:2.4.1.17 - 1-naphthol glucuronyltransferase, ec:2.4.2.8…
TRINITY_DN10065_c0_g2_i13	Glycerophospholipid metabolism, Phosphatidylinositol signaling system	map00564, map04070	30, 24	ec:3.1.4.4 - D, ec:2.7.7.15 - cytidylyltransferase, ec:2.3.1.51 - O-acyltransferase, ec:2.7.8.5 - 1-phosphatidyltransferase, ec:2.3.1.23 - O-acyltransferase, ec:2.3.1.42 - O-acyltransferase, ec:2.7.8.11 - 3-phosphatidyltransferase, ec:2.1.1.17 - N-methyltransferase, ec:1.1.1.8 - dehydrogenase (NAD+), ec:4.1.1.65 - decarboxylase, ec:2.7.8.1 - EPT, ec:2.7.7.41 - cytidylyltransferase, ec:2.7.1.107 -…
TRINITY_DN10065_c0_g2_i15	Glycerophospholipid metabolism, Phosphatidylinositol signaling system	map00564, map04070	30, 24	ec:3.1.4.4 - D, ec:2.7.7.15 - cytidylyltransferase, ec:2.3.1.51 - O-acyltransferase, ec:2.7.8.5 - 1-phosphatidyltransferase, ec:2.3.1.23 - O-acyltransferase, ec:2.3.1.42 - O-acyltransferase, ec:2.7.8.11 - 3-phosphatidyltransferase, ec:2.1.1.17 - N-methyltransferase, ec:1.1.1.8 - dehydrogenase (NAD+), ec:4.1.1.65 - decarboxylase, ec:2.7.8.1 - EPT, ec:2.7.7.41 - cytidylyltransferase, ec:2.7.1.107 -…
TRINITY_DN28528_c0_g1_i7	Cysteine and methionine metabolism	map00270	28	ec:3.3.1.1 - S-adenosylhomocysteine synthase, ec:2.6.1.3 - transaminase, ec:6.3.2.3 - synthase, ec:1.1.1.37 - dehydrogenase, ec:4.2.1.109 - 1-phosphate dehydratase, ec:4.2.1.22 - beta-synthase, ec:2.5.1.22 - synthase, ec:5.3.2.5 - enolase, ec:4.1.1.50 - decarboxylase, ec:2.4.2.28 - phosphorylase, ec:2.1.1.13 - synthase, ec:2.1.1.5 - S-methyltransferase, ec:4.3.1.17 - ammonia-lyase, ec:2.6.1.1 - t…
TRINITY_DN10065_c0_g2_i11	Glycerophospholipid metabolism, Phosphatidylinositol signaling system	map00564, map04070	30, 24	ec:3.1.4.4 - D, ec:2.7.7.15 - cytidylyltransferase, ec:2.3.1.51 - O-acyltransferase, ec:2.7.8.5 - 1-phosphatidyltransferase, ec:2.3.1.23 - O-acyltransferase, ec:2.3.1.42 - O-acyltransferase, ec:2.7.8.11 - 3-phosphatidyltransferase, ec:2.1.1.17 - N-methyltransferase, ec:1.1.1.8 - dehydrogenase (NAD+), ec:4.1.1.65 - decarboxylase, ec:2.7.8.1 - EPT, ec:2.7.7.41 - cytidylyltransferase, ec:2.7.1.107 -…
TRINITY_DN28528_c0_g1_i8	Cysteine and methionine metabolism	map00270	28	ec:3.3.1.1 - S-adenosylhomocysteine synthase, ec:2.6.1.3 - transaminase, ec:6.3.2.3 - synthase, ec:1.1.1.37 - dehydrogenase, ec:4.2.1.109 - 1-phosphate dehydratase, ec:4.2.1.22 - beta-synthase, ec:2.5.1.22 - synthase, ec:5.3.2.5 - enolase, ec:4.1.1.50 - decarboxylase, ec:2.4.2.28 - phosphorylase, ec:2.1.1.13 - synthase, ec:2.1.1.5 - S-methyltransferase, ec:4.3.1.17 - ammonia-lyase, ec:2.6.1.1 - t…
TRINITY_DN11560_c0_g1_i1	Aminoacyl-tRNA biosynthesis	map00970	22	ec:6.1.1.22 - ligase, ec:6.1.1.19 - ligase, ec:2.1.2.9 - formyltransferase, ec:6.1.1.9 - ligase, ec:6.1.1.3 - ligase, ec:6.1.1.15 - ligase, ec:6.1.1.5 - ligase, ec:6.1.1.10 - ligase, ec:6.1.1.21 - ligase, ec:6.1.1.18 - ligase, ec:6.1.1.7 - ligase, ec:6.1.1.12 - ligase, ec:6.1.1.2 - ligase, ec:6.3.5.7 - synthase (glutamine-hydrolysing), ec:6.1.1.14 - ligase, ec:6.1.1.4 - ligase, ec:6.1.1.20 - liga…
TRINITY_DN28528_c0_g1_i2	Cysteine and methionine metabolism	map00270	28	ec:3.3.1.1 - S-adenosylhomocysteine synthase, ec:2.6.1.3 - transaminase, ec:6.3.2.3 - synthase, ec:1.1.1.37 - dehydrogenase, ec:4.2.1.109 - 1-phosphate dehydratase, ec:4.2.1.22 - beta-synthase, ec:2.5.1.22 - synthase, ec:5.3.2.5 - enolase, ec:4.1.1.50 - decarboxylase, ec:2.4.2.28 - phosphorylase, ec:2.1.1.13 - synthase, ec:2.1.1.5 - S-methyltransferase, ec:4.3.1.17 - ammonia-lyase, ec:2.6.1.1 - t…
TRINITY_DN28528_c0_g1_i5	Cysteine and methionine metabolism	map00270	28	ec:3.3.1.1 - S-adenosylhomocysteine synthase, ec:2.6.1.3 - transaminase, ec:6.3.2.3 - synthase, ec:1.1.1.37 - dehydrogenase, ec:4.2.1.109 - 1-phosphate dehydratase, ec:4.2.1.22 - beta-synthase, ec:2.5.1.22 - synthase, ec:5.3.2.5 - enolase, ec:4.1.1.50 - decarboxylase, ec:2.4.2.28 - phosphorylase, ec:2.1.1.13 - synthase, ec:2.1.1.5 - S-methyltransferase, ec:4.3.1.17 - ammonia-lyase, ec:2.6.1.1 - t…
TRINITY_DN199042_c0_g1_i1	Drug metabolism - other enzymes, Methane metabolism	map00983, map00680	20, 13	ec:2.7.1.48 - kinase, ec:3.5.2.2 - hydantoinase, ec:3.1.1.1 - ali-esterase, ec:1.17.4.1 - reductase, ec:2.4.2.10 - phosphoribosyltransferase, ec:3.2.1.31 - beta-glucuronide glucuronohydrolase glucuronidase, ec:3.6.1.23 - diphosphatase, ec:3.5.4.5 - deaminase, ec:6.3.5.2 - synthase (glutamine-hydrolysing), ec:2.3.1.5 - N-acetyltransferase, ec:2.4.1.17 - 1-naphthol glucuronyltransferase, ec:2.4.2.8…
TRINITY_DN91558_c0_g1_i1	Purine metabolism, Thiamine metabolism	map00230, map00730	54, 7	ec:3.6.1.15 - phosphatase, ec:4.6.1.2 - cyclase, ec:3.1.4.35 - phosphodiesterase, ec:3.5.4.10 - cyclohydrolase, ec:3.1.5.1 - deoxy-GTPase, ec:3.6.1.9 - diphosphatase, ec:3.5.4.3 - deaminase, ec:3.6.1.17 - (asymmetrical), ec:1.17.4.1 - reductase, ec:3.6.1.3 - adenylpyrophosphatase, ec:3.1.4.17 - phosphodiesterase, ec:4.3.2.2 - lyase, ec:1.7.1.7 - reductase, ec:1.17.1.4 - dehydrogenase, ec:2.7.7.4 …
TRINITY_DN79193_c0_g1_i1	alpha-Linolenic acid metabolism, Biosynthesis of unsaturated fatty acids, Propanoate metabolism, Fatty acid degradation, Primary bile acid biosynthesis, beta-Alanine metabolism	map00592, map01040, map00640, map00071, map00120, map00410	6, 9, 21, 13, 6, 12	ec:1.3.3.6 - oxidase, ec:2.3.1.16 - C-acyltransferase, ec:3.1.1.32 - A1, ec:1.1.1.1 - dehydrogenase, ec:4.2.1.17 - hydratase, ec:3.1.1.4 - A2, ec:2.3.1.199 - 3-oxoacyl-CoA synthase, ec:1.14.19.1 - 9-desaturase, ec:1.1.1.330 - 3-oxoacyl-CoA reductase, ec:1.3.1.93 - enoyl-CoA reductase, ec:1.3.3.6 - oxidase, ec:4.2.1.134 - (3R)-3-hydroxyacyl-CoA dehydratase, ec:2.3.1.16 - C-acyltransferase, ec:2.3.…
TRINITY_DN12022_c0_g1_i1	Cysteine and methionine metabolism, Pyruvate metabolism, Carbon fixation pathways in prokaryotes, Citrate cycle (TCA cycle), Methane metabolism, Glyoxylate and dicarboxylate metabolism, Carbon fixation in photosynthetic organisms	map00270, map00620, map00720, map00020, map00680, map00630, map00710	28, 24, 21, 17, 13, 18, 15	ec:3.3.1.1 - S-adenosylhomocysteine synthase, ec:2.6.1.3 - transaminase, ec:6.3.2.3 - synthase, ec:1.1.1.37 - dehydrogenase, ec:4.2.1.109 - 1-phosphate dehydratase, ec:4.2.1.22 - beta-synthase, ec:2.5.1.22 - synthase, ec:5.3.2.5 - enolase, ec:4.1.1.50 - decarboxylase, ec:2.4.2.28 - phosphorylase, ec:2.1.1.13 - synthase, ec:2.1.1.5 - S-methyltransferase, ec:4.3.1.17 - ammonia-lyase, ec:2.6.1.1 - t…
TRINITY_DN12022_c0_g1_i3	Cysteine and methionine metabolism, Pyruvate metabolism, Carbon fixation pathways in prokaryotes, Citrate cycle (TCA cycle), Methane metabolism, Glyoxylate and dicarboxylate metabolism, Carbon fixation in photosynthetic organisms	map00270, map00620, map00720, map00020, map00680, map00630, map00710	28, 24, 21, 17, 13, 18, 15	ec:3.3.1.1 - S-adenosylhomocysteine synthase, ec:2.6.1.3 - transaminase, ec:6.3.2.3 - synthase, ec:1.1.1.37 - dehydrogenase, ec:4.2.1.109 - 1-phosphate dehydratase, ec:4.2.1.22 - beta-synthase, ec:2.5.1.22 - synthase, ec:5.3.2.5 - enolase, ec:4.1.1.50 - decarboxylase, ec:2.4.2.28 - phosphorylase, ec:2.1.1.13 - synthase, ec:2.1.1.5 - S-methyltransferase, ec:4.3.1.17 - ammonia-lyase, ec:2.6.1.1 - t…
TRINITY_DN23021_c0_g2_i4	Purine metabolism, Thiamine metabolism	map00230, map00730	54, 7	ec:3.6.1.15 - phosphatase, ec:4.6.1.2 - cyclase, ec:3.1.4.35 - phosphodiesterase, ec:3.5.4.10 - cyclohydrolase, ec:3.1.5.1 - deoxy-GTPase, ec:3.6.1.9 - diphosphatase, ec:3.5.4.3 - deaminase, ec:3.6.1.17 - (asymmetrical), ec:1.17.4.1 - reductase, ec:3.6.1.3 - adenylpyrophosphatase, ec:3.1.4.17 - phosphodiesterase, ec:4.3.2.2 - lyase, ec:1.7.1.7 - reductase, ec:1.17.1.4 - dehydrogenase, ec:2.7.7.4 …
TRINITY_DN23021_c0_g2_i2	Purine metabolism, Thiamine metabolism	map00230, map00730	54, 7	ec:3.6.1.15 - phosphatase, ec:4.6.1.2 - cyclase, ec:3.1.4.35 - phosphodiesterase, ec:3.5.4.10 - cyclohydrolase, ec:3.1.5.1 - deoxy-GTPase, ec:3.6.1.9 - diphosphatase, ec:3.5.4.3 - deaminase, ec:3.6.1.17 - (asymmetrical), ec:1.17.4.1 - reductase, ec:3.6.1.3 - adenylpyrophosphatase, ec:3.1.4.17 - phosphodiesterase, ec:4.3.2.2 - lyase, ec:1.7.1.7 - reductase, ec:1.17.1.4 - dehydrogenase, ec:2.7.7.4 …
TRINITY_DN23021_c0_g2_i3	Purine metabolism, Thiamine metabolism	map00230, map00730	54, 7	ec:3.6.1.15 - phosphatase, ec:4.6.1.2 - cyclase, ec:3.1.4.35 - phosphodiesterase, ec:3.5.4.10 - cyclohydrolase, ec:3.1.5.1 - deoxy-GTPase, ec:3.6.1.9 - diphosphatase, ec:3.5.4.3 - deaminase, ec:3.6.1.17 - (asymmetrical), ec:1.17.4.1 - reductase, ec:3.6.1.3 - adenylpyrophosphatase, ec:3.1.4.17 - phosphodiesterase, ec:4.3.2.2 - lyase, ec:1.7.1.7 - reductase, ec:1.17.1.4 - dehydrogenase, ec:2.7.7.4 …
TRINITY_DN23513_c2_g1_i1	Various types of N-glycan biosynthesis, N-Glycan biosynthesis, Other glycan degradation	map00513, map00510, map00511	13, 20, 9	ec:2.4.1.38 - beta-1,4-galactosyltransferase, ec:2.4.1.101 - 2-beta-N-acetylglucosaminyltransferase, ec:2.4.1.68 - 6-alpha-L-fucosyltransferase, ec:2.4.1.131 - alpha-1,2-mannosyltransferase, ec:2.4.1.258 - alpha-1,3-mannosyltransferase, ec:2.4.1.141 - N-acetylglucosaminyltransferase, ec:2.4.1.132 - alpha-1,3-mannosyltransferase, ec:2.4.1.143 - 2-beta-N-acetylglucosaminyltransferase, ec:3.2.1.52 -…
TRINITY_DN18194_c0_g1_i4	Purine metabolism, Thiamine metabolism	map00230, map00730	54, 7	ec:3.6.1.15 - phosphatase, ec:4.6.1.2 - cyclase, ec:3.1.4.35 - phosphodiesterase, ec:3.5.4.10 - cyclohydrolase, ec:3.1.5.1 - deoxy-GTPase, ec:3.6.1.9 - diphosphatase, ec:3.5.4.3 - deaminase, ec:3.6.1.17 - (asymmetrical), ec:1.17.4.1 - reductase, ec:3.6.1.3 - adenylpyrophosphatase, ec:3.1.4.17 - phosphodiesterase, ec:4.3.2.2 - lyase, ec:1.7.1.7 - reductase, ec:1.17.1.4 - dehydrogenase, ec:2.7.7.4 …
TRINITY_DN3128_c1_g1_i2	Drug metabolism - other enzymes, Nitrotoluene degradation, Caffeine metabolism	map00983, map00633, map00232	20, 1, 3	ec:2.7.1.48 - kinase, ec:3.5.2.2 - hydantoinase, ec:3.1.1.1 - ali-esterase, ec:1.17.4.1 - reductase, ec:2.4.2.10 - phosphoribosyltransferase, ec:3.2.1.31 - beta-glucuronide glucuronohydrolase glucuronidase, ec:3.6.1.23 - diphosphatase, ec:3.5.4.5 - deaminase, ec:6.3.5.2 - synthase (glutamine-hydrolysing), ec:2.3.1.5 - N-acetyltransferase, ec:2.4.1.17 - 1-naphthol glucuronyltransferase, ec:2.4.2.8…
TRINITY_DN3128_c1_g1_i5	Drug metabolism - other enzymes, Nitrotoluene degradation, Caffeine metabolism	map00983, map00633, map00232	20, 1, 3	ec:2.7.1.48 - kinase, ec:3.5.2.2 - hydantoinase, ec:3.1.1.1 - ali-esterase, ec:1.17.4.1 - reductase, ec:2.4.2.10 - phosphoribosyltransferase, ec:3.2.1.31 - beta-glucuronide glucuronohydrolase glucuronidase, ec:3.6.1.23 - diphosphatase, ec:3.5.4.5 - deaminase, ec:6.3.5.2 - synthase (glutamine-hydrolysing), ec:2.3.1.5 - N-acetyltransferase, ec:2.4.1.17 - 1-naphthol glucuronyltransferase, ec:2.4.2.8…
TRINITY_DN3128_c1_g1_i4	Drug metabolism - other enzymes, Nitrotoluene degradation, Caffeine metabolism	map00983, map00633, map00232	20, 1, 3	ec:2.7.1.48 - kinase, ec:3.5.2.2 - hydantoinase, ec:3.1.1.1 - ali-esterase, ec:1.17.4.1 - reductase, ec:2.4.2.10 - phosphoribosyltransferase, ec:3.2.1.31 - beta-glucuronide glucuronohydrolase glucuronidase, ec:3.6.1.23 - diphosphatase, ec:3.5.4.5 - deaminase, ec:6.3.5.2 - synthase (glutamine-hydrolysing), ec:2.3.1.5 - N-acetyltransferase, ec:2.4.1.17 - 1-naphthol glucuronyltransferase, ec:2.4.2.8…
TRINITY_DN3128_c1_g1_i7	Drug metabolism - other enzymes, Nitrotoluene degradation, Caffeine metabolism	map00983, map00633, map00232	20, 1, 3	ec:2.7.1.48 - kinase, ec:3.5.2.2 - hydantoinase, ec:3.1.1.1 - ali-esterase, ec:1.17.4.1 - reductase, ec:2.4.2.10 - phosphoribosyltransferase, ec:3.2.1.31 - beta-glucuronide glucuronohydrolase glucuronidase, ec:3.6.1.23 - diphosphatase, ec:3.5.4.5 - deaminase, ec:6.3.5.2 - synthase (glutamine-hydrolysing), ec:2.3.1.5 - N-acetyltransferase, ec:2.4.1.17 - 1-naphthol glucuronyltransferase, ec:2.4.2.8…
TRINITY_DN96608_c0_g1_i1	Purine metabolism, Thiamine metabolism	map00230, map00730	54, 7	ec:3.6.1.15 - phosphatase, ec:4.6.1.2 - cyclase, ec:3.1.4.35 - phosphodiesterase, ec:3.5.4.10 - cyclohydrolase, ec:3.1.5.1 - deoxy-GTPase, ec:3.6.1.9 - diphosphatase, ec:3.5.4.3 - deaminase, ec:3.6.1.17 - (asymmetrical), ec:1.17.4.1 - reductase, ec:3.6.1.3 - adenylpyrophosphatase, ec:3.1.4.17 - phosphodiesterase, ec:4.3.2.2 - lyase, ec:1.7.1.7 - reductase, ec:1.17.1.4 - dehydrogenase, ec:2.7.7.4 …
TRINITY_DN18194_c0_g1_i1	Purine metabolism, Thiamine metabolism	map00230, map00730	54, 7	ec:3.6.1.15 - phosphatase, ec:4.6.1.2 - cyclase, ec:3.1.4.35 - phosphodiesterase, ec:3.5.4.10 - cyclohydrolase, ec:3.1.5.1 - deoxy-GTPase, ec:3.6.1.9 - diphosphatase, ec:3.5.4.3 - deaminase, ec:3.6.1.17 - (asymmetrical), ec:1.17.4.1 - reductase, ec:3.6.1.3 - adenylpyrophosphatase, ec:3.1.4.17 - phosphodiesterase, ec:4.3.2.2 - lyase, ec:1.7.1.7 - reductase, ec:1.17.1.4 - dehydrogenase, ec:2.7.7.4 …
TRINITY_DN1900_c0_g1_i21	Other glycan degradation	map00511	9	ec:3.2.1.45 - psychosine hydrolase, ec:3.2.1.51 - alpha-fucosidase, ec:3.2.1.23 - lactase (ambiguous), ec:3.2.1.25 - mannanase, ec:3.5.1.26 - aspartylglucosylamine deaspartylase, ec:3.2.1.96 - endo-beta-N-acetylglucosaminidase, ec:3.2.1.18 - neuraminidase, ec:3.2.1.52 - hexosaminidase, ec:3.2.1.24 - alpha-D-mannosidase
TRINITY_DN1900_c0_g1_i22	Other glycan degradation	map00511	9	ec:3.2.1.45 - psychosine hydrolase, ec:3.2.1.51 - alpha-fucosidase, ec:3.2.1.23 - lactase (ambiguous), ec:3.2.1.25 - mannanase, ec:3.5.1.26 - aspartylglucosylamine deaspartylase, ec:3.2.1.96 - endo-beta-N-acetylglucosaminidase, ec:3.2.1.18 - neuraminidase, ec:3.2.1.52 - hexosaminidase, ec:3.2.1.24 - alpha-D-mannosidase
TRINITY_DN1900_c0_g1_i20	Other glycan degradation	map00511	9	ec:3.2.1.45 - psychosine hydrolase, ec:3.2.1.51 - alpha-fucosidase, ec:3.2.1.23 - lactase (ambiguous), ec:3.2.1.25 - mannanase, ec:3.5.1.26 - aspartylglucosylamine deaspartylase, ec:3.2.1.96 - endo-beta-N-acetylglucosaminidase, ec:3.2.1.18 - neuraminidase, ec:3.2.1.52 - hexosaminidase, ec:3.2.1.24 - alpha-D-mannosidase
TRINITY_DN23437_c0_g2_i1	Aminoacyl-tRNA biosynthesis	map00970	22	ec:6.1.1.22 - ligase, ec:6.1.1.19 - ligase, ec:2.1.2.9 - formyltransferase, ec:6.1.1.9 - ligase, ec:6.1.1.3 - ligase, ec:6.1.1.15 - ligase, ec:6.1.1.5 - ligase, ec:6.1.1.10 - ligase, ec:6.1.1.21 - ligase, ec:6.1.1.18 - ligase, ec:6.1.1.7 - ligase, ec:6.1.1.12 - ligase, ec:6.1.1.2 - ligase, ec:6.3.5.7 - synthase (glutamine-hydrolysing), ec:6.1.1.14 - ligase, ec:6.1.1.4 - ligase, ec:6.1.1.20 - liga…
TRINITY_DN3128_c1_g1_i8	Drug metabolism - other enzymes, Nitrotoluene degradation, Caffeine metabolism	map00983, map00633, map00232	20, 1, 3	ec:2.7.1.48 - kinase, ec:3.5.2.2 - hydantoinase, ec:3.1.1.1 - ali-esterase, ec:1.17.4.1 - reductase, ec:2.4.2.10 - phosphoribosyltransferase, ec:3.2.1.31 - beta-glucuronide glucuronohydrolase glucuronidase, ec:3.6.1.23 - diphosphatase, ec:3.5.4.5 - deaminase, ec:6.3.5.2 - synthase (glutamine-hydrolysing), ec:2.3.1.5 - N-acetyltransferase, ec:2.4.1.17 - 1-naphthol glucuronyltransferase, ec:2.4.2.8…
TRINITY_DN23437_c0_g2_i2	Aminoacyl-tRNA biosynthesis	map00970	22	ec:6.1.1.22 - ligase, ec:6.1.1.19 - ligase, ec:2.1.2.9 - formyltransferase, ec:6.1.1.9 - ligase, ec:6.1.1.3 - ligase, ec:6.1.1.15 - ligase, ec:6.1.1.5 - ligase, ec:6.1.1.10 - ligase, ec:6.1.1.21 - ligase, ec:6.1.1.18 - ligase, ec:6.1.1.7 - ligase, ec:6.1.1.12 - ligase, ec:6.1.1.2 - ligase, ec:6.3.5.7 - synthase (glutamine-hydrolysing), ec:6.1.1.14 - ligase, ec:6.1.1.4 - ligase, ec:6.1.1.20 - liga…
TRINITY_DN265149_c0_g1_i1	Purine metabolism, Thiamine metabolism	map00230, map00730	54, 7	ec:3.6.1.15 - phosphatase, ec:4.6.1.2 - cyclase, ec:3.1.4.35 - phosphodiesterase, ec:3.5.4.10 - cyclohydrolase, ec:3.1.5.1 - deoxy-GTPase, ec:3.6.1.9 - diphosphatase, ec:3.5.4.3 - deaminase, ec:3.6.1.17 - (asymmetrical), ec:1.17.4.1 - reductase, ec:3.6.1.3 - adenylpyrophosphatase, ec:3.1.4.17 - phosphodiesterase, ec:4.3.2.2 - lyase, ec:1.7.1.7 - reductase, ec:1.17.1.4 - dehydrogenase, ec:2.7.7.4 …
TRINITY_DN31952_c0_g4_i1	Drug metabolism - other enzymes, Purine metabolism, Caffeine metabolism	map00983, map00230, map00232	20, 54, 3	ec:2.7.1.48 - kinase, ec:3.5.2.2 - hydantoinase, ec:3.1.1.1 - ali-esterase, ec:1.17.4.1 - reductase, ec:2.4.2.10 - phosphoribosyltransferase, ec:3.2.1.31 - beta-glucuronide glucuronohydrolase glucuronidase, ec:3.6.1.23 - diphosphatase, ec:3.5.4.5 - deaminase, ec:6.3.5.2 - synthase (glutamine-hydrolysing), ec:2.3.1.5 - N-acetyltransferase, ec:2.4.1.17 - 1-naphthol glucuronyltransferase, ec:2.4.2.8…
TRINITY_DN198631_c0_g1_i1	Aminoacyl-tRNA biosynthesis	map00970	22	ec:6.1.1.22 - ligase, ec:6.1.1.19 - ligase, ec:2.1.2.9 - formyltransferase, ec:6.1.1.9 - ligase, ec:6.1.1.3 - ligase, ec:6.1.1.15 - ligase, ec:6.1.1.5 - ligase, ec:6.1.1.10 - ligase, ec:6.1.1.21 - ligase, ec:6.1.1.18 - ligase, ec:6.1.1.7 - ligase, ec:6.1.1.12 - ligase, ec:6.1.1.2 - ligase, ec:6.3.5.7 - synthase (glutamine-hydrolysing), ec:6.1.1.14 - ligase, ec:6.1.1.4 - ligase, ec:6.1.1.20 - liga…
TRINITY_DN2711_c0_g2_i1	Steroid degradation, Steroid hormone biosynthesis	map00984, map00140	4, 11	ec:1.1.1.145 - dehydrogenase, ec:5.3.3.1 - Delta-isomerase, ec:1.1.1.51 - 17)beta-hydroxysteroid dehydrogenase, ec:1.3.99.5 - 4-dehydrogenase (acceptor), ec:1.14.15.6 - monooxygenase (side-chain-cleaving), ec:2.1.1.6 - O-methyltransferase, ec:1.1.1.145 - dehydrogenase, ec:5.3.3.1 - Delta-isomerase, ec:3.1.6.1 - sulfatase, ec:1.1.1.51 - 17)beta-hydroxysteroid dehydrogenase, ec:1.1.1.62 - 17-dehydr…
TRINITY_DN2844_c1_g1_i7	Drug metabolism - other enzymes, Nitrotoluene degradation, Caffeine metabolism	map00983, map00633, map00232	20, 1, 3	ec:2.7.1.48 - kinase, ec:3.5.2.2 - hydantoinase, ec:3.1.1.1 - ali-esterase, ec:1.17.4.1 - reductase, ec:2.4.2.10 - phosphoribosyltransferase, ec:3.2.1.31 - beta-glucuronide glucuronohydrolase glucuronidase, ec:3.6.1.23 - diphosphatase, ec:3.5.4.5 - deaminase, ec:6.3.5.2 - synthase (glutamine-hydrolysing), ec:2.3.1.5 - N-acetyltransferase, ec:2.4.1.17 - 1-naphthol glucuronyltransferase, ec:2.4.2.8…
TRINITY_DN132109_c0_g1_i1	Purine metabolism, Thiamine metabolism	map00230, map00730	54, 7	ec:3.6.1.15 - phosphatase, ec:4.6.1.2 - cyclase, ec:3.1.4.35 - phosphodiesterase, ec:3.5.4.10 - cyclohydrolase, ec:3.1.5.1 - deoxy-GTPase, ec:3.6.1.9 - diphosphatase, ec:3.5.4.3 - deaminase, ec:3.6.1.17 - (asymmetrical), ec:1.17.4.1 - reductase, ec:3.6.1.3 - adenylpyrophosphatase, ec:3.1.4.17 - phosphodiesterase, ec:4.3.2.2 - lyase, ec:1.7.1.7 - reductase, ec:1.17.1.4 - dehydrogenase, ec:2.7.7.4 …
TRINITY_DN75814_c0_g1_i1	Purine metabolism, Thiamine metabolism	map00230, map00730	54, 7	ec:3.6.1.15 - phosphatase, ec:4.6.1.2 - cyclase, ec:3.1.4.35 - phosphodiesterase, ec:3.5.4.10 - cyclohydrolase, ec:3.1.5.1 - deoxy-GTPase, ec:3.6.1.9 - diphosphatase, ec:3.5.4.3 - deaminase, ec:3.6.1.17 - (asymmetrical), ec:1.17.4.1 - reductase, ec:3.6.1.3 - adenylpyrophosphatase, ec:3.1.4.17 - phosphodiesterase, ec:4.3.2.2 - lyase, ec:1.7.1.7 - reductase, ec:1.17.1.4 - dehydrogenase, ec:2.7.7.4 …
TRINITY_DN148991_c0_g2_i1	Purine metabolism, Thiamine metabolism	map00230, map00730	54, 7	ec:3.6.1.15 - phosphatase, ec:4.6.1.2 - cyclase, ec:3.1.4.35 - phosphodiesterase, ec:3.5.4.10 - cyclohydrolase, ec:3.1.5.1 - deoxy-GTPase, ec:3.6.1.9 - diphosphatase, ec:3.5.4.3 - deaminase, ec:3.6.1.17 - (asymmetrical), ec:1.17.4.1 - reductase, ec:3.6.1.3 - adenylpyrophosphatase, ec:3.1.4.17 - phosphodiesterase, ec:4.3.2.2 - lyase, ec:1.7.1.7 - reductase, ec:1.17.1.4 - dehydrogenase, ec:2.7.7.4 …
TRINITY_DN2844_c1_g1_i9	Drug metabolism - other enzymes, Nitrotoluene degradation, Caffeine metabolism	map00983, map00633, map00232	20, 1, 3	ec:2.7.1.48 - kinase, ec:3.5.2.2 - hydantoinase, ec:3.1.1.1 - ali-esterase, ec:1.17.4.1 - reductase, ec:2.4.2.10 - phosphoribosyltransferase, ec:3.2.1.31 - beta-glucuronide glucuronohydrolase glucuronidase, ec:3.6.1.23 - diphosphatase, ec:3.5.4.5 - deaminase, ec:6.3.5.2 - synthase (glutamine-hydrolysing), ec:2.3.1.5 - N-acetyltransferase, ec:2.4.1.17 - 1-naphthol glucuronyltransferase, ec:2.4.2.8…
TRINITY_DN10319_c2_g1_i1	Purine metabolism, Thiamine metabolism	map00230, map00730	54, 7	ec:3.6.1.15 - phosphatase, ec:4.6.1.2 - cyclase, ec:3.1.4.35 - phosphodiesterase, ec:3.5.4.10 - cyclohydrolase, ec:3.1.5.1 - deoxy-GTPase, ec:3.6.1.9 - diphosphatase, ec:3.5.4.3 - deaminase, ec:3.6.1.17 - (asymmetrical), ec:1.17.4.1 - reductase, ec:3.6.1.3 - adenylpyrophosphatase, ec:3.1.4.17 - phosphodiesterase, ec:4.3.2.2 - lyase, ec:1.7.1.7 - reductase, ec:1.17.1.4 - dehydrogenase, ec:2.7.7.4 …
TRINITY_DN2844_c1_g1_i2	Drug metabolism - other enzymes, Nitrotoluene degradation, Caffeine metabolism	map00983, map00633, map00232	20, 1, 3	ec:2.7.1.48 - kinase, ec:3.5.2.2 - hydantoinase, ec:3.1.1.1 - ali-esterase, ec:1.17.4.1 - reductase, ec:2.4.2.10 - phosphoribosyltransferase, ec:3.2.1.31 - beta-glucuronide glucuronohydrolase glucuronidase, ec:3.6.1.23 - diphosphatase, ec:3.5.4.5 - deaminase, ec:6.3.5.2 - synthase (glutamine-hydrolysing), ec:2.3.1.5 - N-acetyltransferase, ec:2.4.1.17 - 1-naphthol glucuronyltransferase, ec:2.4.2.8…
TRINITY_DN268697_c0_g1_i1	Purine metabolism, Thiamine metabolism	map00230, map00730	54, 7	ec:3.6.1.15 - phosphatase, ec:4.6.1.2 - cyclase, ec:3.1.4.35 - phosphodiesterase, ec:3.5.4.10 - cyclohydrolase, ec:3.1.5.1 - deoxy-GTPase, ec:3.6.1.9 - diphosphatase, ec:3.5.4.3 - deaminase, ec:3.6.1.17 - (asymmetrical), ec:1.17.4.1 - reductase, ec:3.6.1.3 - adenylpyrophosphatase, ec:3.1.4.17 - phosphodiesterase, ec:4.3.2.2 - lyase, ec:1.7.1.7 - reductase, ec:1.17.1.4 - dehydrogenase, ec:2.7.7.4 …
TRINITY_DN2844_c1_g1_i5	Drug metabolism - other enzymes, Nitrotoluene degradation, Caffeine metabolism	map00983, map00633, map00232	20, 1, 3	ec:2.7.1.48 - kinase, ec:3.5.2.2 - hydantoinase, ec:3.1.1.1 - ali-esterase, ec:1.17.4.1 - reductase, ec:2.4.2.10 - phosphoribosyltransferase, ec:3.2.1.31 - beta-glucuronide glucuronohydrolase glucuronidase, ec:3.6.1.23 - diphosphatase, ec:3.5.4.5 - deaminase, ec:6.3.5.2 - synthase (glutamine-hydrolysing), ec:2.3.1.5 - N-acetyltransferase, ec:2.4.1.17 - 1-naphthol glucuronyltransferase, ec:2.4.2.8…
TRINITY_DN21138_c1_g1_i1	Glycerophospholipid metabolism, Glycerolipid metabolism	map00564, map00561	30, 19	ec:3.1.4.4 - D, ec:2.7.7.15 - cytidylyltransferase, ec:2.3.1.51 - O-acyltransferase, ec:2.7.8.5 - 1-phosphatidyltransferase, ec:2.3.1.23 - O-acyltransferase, ec:2.3.1.42 - O-acyltransferase, ec:2.7.8.11 - 3-phosphatidyltransferase, ec:2.1.1.17 - N-methyltransferase, ec:1.1.1.8 - dehydrogenase (NAD+), ec:4.1.1.65 - decarboxylase, ec:2.7.8.1 - EPT, ec:2.7.7.41 - cytidylyltransferase, ec:2.7.1.107 -…
TRINITY_DN270903_c0_g1_i1	Purine metabolism, Thiamine metabolism	map00230, map00730	54, 7	ec:3.6.1.15 - phosphatase, ec:4.6.1.2 - cyclase, ec:3.1.4.35 - phosphodiesterase, ec:3.5.4.10 - cyclohydrolase, ec:3.1.5.1 - deoxy-GTPase, ec:3.6.1.9 - diphosphatase, ec:3.5.4.3 - deaminase, ec:3.6.1.17 - (asymmetrical), ec:1.17.4.1 - reductase, ec:3.6.1.3 - adenylpyrophosphatase, ec:3.1.4.17 - phosphodiesterase, ec:4.3.2.2 - lyase, ec:1.7.1.7 - reductase, ec:1.17.1.4 - dehydrogenase, ec:2.7.7.4 …
TRINITY_DN230156_c0_g1_i1	Phosphatidylinositol signaling system, Inositol phosphate metabolism	map04070, map00562	24, 25	ec:2.7.1.127 - 3-kinase, ec:2.7.1.158 - 2-kinase, ec:2.7.1.67 - 4-kinase, ec:2.7.4.24 - kinase, ec:2.7.1.149 - 4-kinase, ec:2.7.8.11 - 3-phosphatidyltransferase, ec:3.1.3.56 - 5-phosphatase, ec:2.7.1.154 - 3-kinase, ec:2.7.7.41 - cytidylyltransferase, ec:2.7.4.21 - kinase, ec:3.1.3.67 - 3-phosphatase, ec:2.7.1.107 - kinase (ATP), ec:2.7.1.137 - 3-kinase, ec:3.1.3.25 - phosphatase, ec:3.1.3.64 - i…
TRINITY_DN88838_c4_g1_i1	Glycosaminoglycan degradation	map00531	11	ec:3.2.1.76 - alpha-L-iduronidase, ec:2.3.1.78 - N-acetyltransferase, ec:3.2.1.31 - beta-glucuronide glucuronohydrolase glucuronidase, ec:3.1.6.13 - chondroitinsulfatase, ec:3.2.1.23 - lactase (ambiguous), ec:3.1.6.4 - chondroitin sulfatase, ec:3.2.1.35 - hyaluronidase, ec:3.1.6.12 - chondroitinsulfatase, ec:3.2.1.52 - hexosaminidase, ec:3.1.6.14 - chondroitinsulfatase, ec:3.10.1.1 - sulfohydrola…
TRINITY_DN188263_c1_g1_i1	Purine metabolism, Thiamine metabolism	map00230, map00730	54, 7	ec:3.6.1.15 - phosphatase, ec:4.6.1.2 - cyclase, ec:3.1.4.35 - phosphodiesterase, ec:3.5.4.10 - cyclohydrolase, ec:3.1.5.1 - deoxy-GTPase, ec:3.6.1.9 - diphosphatase, ec:3.5.4.3 - deaminase, ec:3.6.1.17 - (asymmetrical), ec:1.17.4.1 - reductase, ec:3.6.1.3 - adenylpyrophosphatase, ec:3.1.4.17 - phosphodiesterase, ec:4.3.2.2 - lyase, ec:1.7.1.7 - reductase, ec:1.17.1.4 - dehydrogenase, ec:2.7.7.4 …
TRINITY_DN174961_c0_g1_i1	Aminoacyl-tRNA biosynthesis, Purine metabolism	map00970, map00230	22, 54	ec:6.1.1.22 - ligase, ec:6.1.1.19 - ligase, ec:2.1.2.9 - formyltransferase, ec:6.1.1.9 - ligase, ec:6.1.1.3 - ligase, ec:6.1.1.15 - ligase, ec:6.1.1.5 - ligase, ec:6.1.1.10 - ligase, ec:6.1.1.21 - ligase, ec:6.1.1.18 - ligase, ec:6.1.1.7 - ligase, ec:6.1.1.12 - ligase, ec:6.1.1.2 - ligase, ec:6.3.5.7 - synthase (glutamine-hydrolysing), ec:6.1.1.14 - ligase, ec:6.1.1.4 - ligase, ec:6.1.1.20 - liga…
TRINITY_DN36689_c0_g1_i1	Purine metabolism, Thiamine metabolism	map00230, map00730	54, 7	ec:3.6.1.15 - phosphatase, ec:4.6.1.2 - cyclase, ec:3.1.4.35 - phosphodiesterase, ec:3.5.4.10 - cyclohydrolase, ec:3.1.5.1 - deoxy-GTPase, ec:3.6.1.9 - diphosphatase, ec:3.5.4.3 - deaminase, ec:3.6.1.17 - (asymmetrical), ec:1.17.4.1 - reductase, ec:3.6.1.3 - adenylpyrophosphatase, ec:3.1.4.17 - phosphodiesterase, ec:4.3.2.2 - lyase, ec:1.7.1.7 - reductase, ec:1.17.1.4 - dehydrogenase, ec:2.7.7.4 …
TRINITY_DN151048_c0_g2_i1	Sphingolipid metabolism, Galactose metabolism, Glycosaminoglycan degradation, Glycosphingolipid biosynthesis - ganglio series, Other glycan degradation	map00600, map00052, map00531, map00604, map00511	18, 19, 11, 5, 9	ec:2.7.1.138 - kinase, ec:3.2.1.45 - psychosine hydrolase, ec:2.7.8.27 - synthase, ec:3.1.4.12 - phosphodiesterase, ec:3.1.6.1 - sulfatase, ec:3.2.1.23 - lactase (ambiguous), ec:3.2.1.22 - melibiase, ec:2.3.1.50 - C-palmitoyltransferase, ec:3.5.1.23 - acylsphingosine deacylase, ec:3.2.1.46 - cerebroside galactosidase, ec:2.3.1.24 - N-acyltransferase, ec:3.1.4.41 - phosphodiesterase D, ec:3.1.3.4 …
TRINITY_DN106355_c1_g2_i1	Glycerophospholipid metabolism, Phosphatidylinositol signaling system, Ether lipid metabolism, Inositol phosphate metabolism	map00564, map04070, map00565, map00562	30, 24, 13, 25	ec:3.1.4.4 - D, ec:2.7.7.15 - cytidylyltransferase, ec:2.3.1.51 - O-acyltransferase, ec:2.7.8.5 - 1-phosphatidyltransferase, ec:2.3.1.23 - O-acyltransferase, ec:2.3.1.42 - O-acyltransferase, ec:2.7.8.11 - 3-phosphatidyltransferase, ec:2.1.1.17 - N-methyltransferase, ec:1.1.1.8 - dehydrogenase (NAD+), ec:4.1.1.65 - decarboxylase, ec:2.7.8.1 - EPT, ec:2.7.7.41 - cytidylyltransferase, ec:2.7.1.107 -…
TRINITY_DN242362_c0_g1_i1	Purine metabolism, Thiamine metabolism	map00230, map00730	54, 7	ec:3.6.1.15 - phosphatase, ec:4.6.1.2 - cyclase, ec:3.1.4.35 - phosphodiesterase, ec:3.5.4.10 - cyclohydrolase, ec:3.1.5.1 - deoxy-GTPase, ec:3.6.1.9 - diphosphatase, ec:3.5.4.3 - deaminase, ec:3.6.1.17 - (asymmetrical), ec:1.17.4.1 - reductase, ec:3.6.1.3 - adenylpyrophosphatase, ec:3.1.4.17 - phosphodiesterase, ec:4.3.2.2 - lyase, ec:1.7.1.7 - reductase, ec:1.17.1.4 - dehydrogenase, ec:2.7.7.4 …
TRINITY_DN548_c0_g2_i23	Phosphatidylinositol signaling system, Inositol phosphate metabolism	map04070, map00562	24, 25	ec:2.7.1.127 - 3-kinase, ec:2.7.1.158 - 2-kinase, ec:2.7.1.67 - 4-kinase, ec:2.7.4.24 - kinase, ec:2.7.1.149 - 4-kinase, ec:2.7.8.11 - 3-phosphatidyltransferase, ec:3.1.3.56 - 5-phosphatase, ec:2.7.1.154 - 3-kinase, ec:2.7.7.41 - cytidylyltransferase, ec:2.7.4.21 - kinase, ec:3.1.3.67 - 3-phosphatase, ec:2.7.1.107 - kinase (ATP), ec:2.7.1.137 - 3-kinase, ec:3.1.3.25 - phosphatase, ec:3.1.3.64 - i…
TRINITY_DN955_c1_g1_i2	Purine metabolism, Thiamine metabolism	map00230, map00730	54, 7	ec:3.6.1.15 - phosphatase, ec:4.6.1.2 - cyclase, ec:3.1.4.35 - phosphodiesterase, ec:3.5.4.10 - cyclohydrolase, ec:3.1.5.1 - deoxy-GTPase, ec:3.6.1.9 - diphosphatase, ec:3.5.4.3 - deaminase, ec:3.6.1.17 - (asymmetrical), ec:1.17.4.1 - reductase, ec:3.6.1.3 - adenylpyrophosphatase, ec:3.1.4.17 - phosphodiesterase, ec:4.3.2.2 - lyase, ec:1.7.1.7 - reductase, ec:1.17.1.4 - dehydrogenase, ec:2.7.7.4 …
TRINITY_DN955_c1_g1_i8	Purine metabolism, Thiamine metabolism	map00230, map00730	54, 7	ec:3.6.1.15 - phosphatase, ec:4.6.1.2 - cyclase, ec:3.1.4.35 - phosphodiesterase, ec:3.5.4.10 - cyclohydrolase, ec:3.1.5.1 - deoxy-GTPase, ec:3.6.1.9 - diphosphatase, ec:3.5.4.3 - deaminase, ec:3.6.1.17 - (asymmetrical), ec:1.17.4.1 - reductase, ec:3.6.1.3 - adenylpyrophosphatase, ec:3.1.4.17 - phosphodiesterase, ec:4.3.2.2 - lyase, ec:1.7.1.7 - reductase, ec:1.17.1.4 - dehydrogenase, ec:2.7.7.4 …
TRINITY_DN222088_c0_g1_i1	T cell receptor signaling pathway, PD-L1 expression and PD-1 checkpoint pathway in cancer, Th1 and Th2 cell differentiation	map04660, map05235, map04658	2, 1, 1	ec:2.7.10.2 - protein-tyrosine kinase, ec:3.1.3.16 - phosphatase, ec:3.1.3.16 - phosphatase, ec:3.1.3.16 - phosphatase
TRINITY_DN52559_c0_g1_i1	Purine metabolism, Thiamine metabolism	map00230, map00730	54, 7	ec:3.6.1.15 - phosphatase, ec:4.6.1.2 - cyclase, ec:3.1.4.35 - phosphodiesterase, ec:3.5.4.10 - cyclohydrolase, ec:3.1.5.1 - deoxy-GTPase, ec:3.6.1.9 - diphosphatase, ec:3.5.4.3 - deaminase, ec:3.6.1.17 - (asymmetrical), ec:1.17.4.1 - reductase, ec:3.6.1.3 - adenylpyrophosphatase, ec:3.1.4.17 - phosphodiesterase, ec:4.3.2.2 - lyase, ec:1.7.1.7 - reductase, ec:1.17.1.4 - dehydrogenase, ec:2.7.7.4 …
TRINITY_DN52559_c0_g1_i2	Purine metabolism, Thiamine metabolism	map00230, map00730	54, 7	ec:3.6.1.15 - phosphatase, ec:4.6.1.2 - cyclase, ec:3.1.4.35 - phosphodiesterase, ec:3.5.4.10 - cyclohydrolase, ec:3.1.5.1 - deoxy-GTPase, ec:3.6.1.9 - diphosphatase, ec:3.5.4.3 - deaminase, ec:3.6.1.17 - (asymmetrical), ec:1.17.4.1 - reductase, ec:3.6.1.3 - adenylpyrophosphatase, ec:3.1.4.17 - phosphodiesterase, ec:4.3.2.2 - lyase, ec:1.7.1.7 - reductase, ec:1.17.1.4 - dehydrogenase, ec:2.7.7.4 …
TRINITY_DN24422_c0_g2_i1	Carbon fixation pathways in prokaryotes, Propanoate metabolism, Valine, leucine and isoleucine degradation, Glyoxylate and dicarboxylate metabolism	map00720, map00640, map00280, map00630	21, 21, 22, 18	ec:1.1.1.35 - dehydrogenase, ec:6.2.1.1 - ligase, ec:6.4.1.3 - carboxylase, ec:4.1.3.25 - lyase, ec:1.5.1.5 - dehydrogenase (NADP+), ec:1.1.1.37 - dehydrogenase, ec:1.1.1.42 - dehydrogenase (NADP+), ec:6.2.1.5 - ligase (ADP-forming), ec:5.1.99.1 - epimerase, ec:1.3.5.1 - dehydrogenase, ec:6.4.1.2 - carboxylase, ec:2.3.3.8 - citrate synthase, ec:1.5.1.20 - reductase [NAD(P)H], ec:5.4.99.2 - mutase…
TRINITY_DN110813_c0_g1_i1	Purine metabolism, Thiamine metabolism	map00230, map00730	54, 7	ec:3.6.1.15 - phosphatase, ec:4.6.1.2 - cyclase, ec:3.1.4.35 - phosphodiesterase, ec:3.5.4.10 - cyclohydrolase, ec:3.1.5.1 - deoxy-GTPase, ec:3.6.1.9 - diphosphatase, ec:3.5.4.3 - deaminase, ec:3.6.1.17 - (asymmetrical), ec:1.17.4.1 - reductase, ec:3.6.1.3 - adenylpyrophosphatase, ec:3.1.4.17 - phosphodiesterase, ec:4.3.2.2 - lyase, ec:1.7.1.7 - reductase, ec:1.17.1.4 - dehydrogenase, ec:2.7.7.4 …
TRINITY_DN69548_c3_g1_i1	Purine metabolism, Thiamine metabolism	map00230, map00730	54, 7	ec:3.6.1.15 - phosphatase, ec:4.6.1.2 - cyclase, ec:3.1.4.35 - phosphodiesterase, ec:3.5.4.10 - cyclohydrolase, ec:3.1.5.1 - deoxy-GTPase, ec:3.6.1.9 - diphosphatase, ec:3.5.4.3 - deaminase, ec:3.6.1.17 - (asymmetrical), ec:1.17.4.1 - reductase, ec:3.6.1.3 - adenylpyrophosphatase, ec:3.1.4.17 - phosphodiesterase, ec:4.3.2.2 - lyase, ec:1.7.1.7 - reductase, ec:1.17.1.4 - dehydrogenase, ec:2.7.7.4 …
TRINITY_DN92697_c0_g5_i3	Purine metabolism, Thiamine metabolism	map00230, map00730	54, 7	ec:3.6.1.15 - phosphatase, ec:4.6.1.2 - cyclase, ec:3.1.4.35 - phosphodiesterase, ec:3.5.4.10 - cyclohydrolase, ec:3.1.5.1 - deoxy-GTPase, ec:3.6.1.9 - diphosphatase, ec:3.5.4.3 - deaminase, ec:3.6.1.17 - (asymmetrical), ec:1.17.4.1 - reductase, ec:3.6.1.3 - adenylpyrophosphatase, ec:3.1.4.17 - phosphodiesterase, ec:4.3.2.2 - lyase, ec:1.7.1.7 - reductase, ec:1.17.1.4 - dehydrogenase, ec:2.7.7.4 …
TRINITY_DN92697_c0_g5_i1	Purine metabolism, Thiamine metabolism	map00230, map00730	54, 7	ec:3.6.1.15 - phosphatase, ec:4.6.1.2 - cyclase, ec:3.1.4.35 - phosphodiesterase, ec:3.5.4.10 - cyclohydrolase, ec:3.1.5.1 - deoxy-GTPase, ec:3.6.1.9 - diphosphatase, ec:3.5.4.3 - deaminase, ec:3.6.1.17 - (asymmetrical), ec:1.17.4.1 - reductase, ec:3.6.1.3 - adenylpyrophosphatase, ec:3.1.4.17 - phosphodiesterase, ec:4.3.2.2 - lyase, ec:1.7.1.7 - reductase, ec:1.17.1.4 - dehydrogenase, ec:2.7.7.4 …
TRINITY_DN197_c1_g1_i4	Cysteine and methionine metabolism	map00270	28	ec:3.3.1.1 - S-adenosylhomocysteine synthase, ec:2.6.1.3 - transaminase, ec:6.3.2.3 - synthase, ec:1.1.1.37 - dehydrogenase, ec:4.2.1.109 - 1-phosphate dehydratase, ec:4.2.1.22 - beta-synthase, ec:2.5.1.22 - synthase, ec:5.3.2.5 - enolase, ec:4.1.1.50 - decarboxylase, ec:2.4.2.28 - phosphorylase, ec:2.1.1.13 - synthase, ec:2.1.1.5 - S-methyltransferase, ec:4.3.1.17 - ammonia-lyase, ec:2.6.1.1 - t…
TRINITY_DN197_c1_g1_i5	Cysteine and methionine metabolism	map00270	28	ec:3.3.1.1 - S-adenosylhomocysteine synthase, ec:2.6.1.3 - transaminase, ec:6.3.2.3 - synthase, ec:1.1.1.37 - dehydrogenase, ec:4.2.1.109 - 1-phosphate dehydratase, ec:4.2.1.22 - beta-synthase, ec:2.5.1.22 - synthase, ec:5.3.2.5 - enolase, ec:4.1.1.50 - decarboxylase, ec:2.4.2.28 - phosphorylase, ec:2.1.1.13 - synthase, ec:2.1.1.5 - S-methyltransferase, ec:4.3.1.17 - ammonia-lyase, ec:2.6.1.1 - t…
TRINITY_DN197_c1_g1_i1	Cysteine and methionine metabolism	map00270	28	ec:3.3.1.1 - S-adenosylhomocysteine synthase, ec:2.6.1.3 - transaminase, ec:6.3.2.3 - synthase, ec:1.1.1.37 - dehydrogenase, ec:4.2.1.109 - 1-phosphate dehydratase, ec:4.2.1.22 - beta-synthase, ec:2.5.1.22 - synthase, ec:5.3.2.5 - enolase, ec:4.1.1.50 - decarboxylase, ec:2.4.2.28 - phosphorylase, ec:2.1.1.13 - synthase, ec:2.1.1.5 - S-methyltransferase, ec:4.3.1.17 - ammonia-lyase, ec:2.6.1.1 - t…
TRINITY_DN197_c1_g1_i2	Cysteine and methionine metabolism	map00270	28	ec:3.3.1.1 - S-adenosylhomocysteine synthase, ec:2.6.1.3 - transaminase, ec:6.3.2.3 - synthase, ec:1.1.1.37 - dehydrogenase, ec:4.2.1.109 - 1-phosphate dehydratase, ec:4.2.1.22 - beta-synthase, ec:2.5.1.22 - synthase, ec:5.3.2.5 - enolase, ec:4.1.1.50 - decarboxylase, ec:2.4.2.28 - phosphorylase, ec:2.1.1.13 - synthase, ec:2.1.1.5 - S-methyltransferase, ec:4.3.1.17 - ammonia-lyase, ec:2.6.1.1 - t…
TRINITY_DN271802_c0_g1_i1	T cell receptor signaling pathway, PD-L1 expression and PD-1 checkpoint pathway in cancer, Th1 and Th2 cell differentiation	map04660, map05235, map04658	2, 1, 1	ec:2.7.10.2 - protein-tyrosine kinase, ec:3.1.3.16 - phosphatase, ec:3.1.3.16 - phosphatase, ec:3.1.3.16 - phosphatase
TRINITY_DN33610_c0_g2_i1	Purine metabolism, Thiamine metabolism	map00230, map00730	54, 7	ec:3.6.1.15 - phosphatase, ec:4.6.1.2 - cyclase, ec:3.1.4.35 - phosphodiesterase, ec:3.5.4.10 - cyclohydrolase, ec:3.1.5.1 - deoxy-GTPase, ec:3.6.1.9 - diphosphatase, ec:3.5.4.3 - deaminase, ec:3.6.1.17 - (asymmetrical), ec:1.17.4.1 - reductase, ec:3.6.1.3 - adenylpyrophosphatase, ec:3.1.4.17 - phosphodiesterase, ec:4.3.2.2 - lyase, ec:1.7.1.7 - reductase, ec:1.17.1.4 - dehydrogenase, ec:2.7.7.4 …
TRINITY_DN54790_c0_g1_i9	Drug metabolism - other enzymes, Glycerophospholipid metabolism	map00983, map00564	20, 30	ec:2.7.1.48 - kinase, ec:3.5.2.2 - hydantoinase, ec:3.1.1.1 - ali-esterase, ec:1.17.4.1 - reductase, ec:2.4.2.10 - phosphoribosyltransferase, ec:3.2.1.31 - beta-glucuronide glucuronohydrolase glucuronidase, ec:3.6.1.23 - diphosphatase, ec:3.5.4.5 - deaminase, ec:6.3.5.2 - synthase (glutamine-hydrolysing), ec:2.3.1.5 - N-acetyltransferase, ec:2.4.1.17 - 1-naphthol glucuronyltransferase, ec:2.4.2.8…
TRINITY_DN283577_c0_g1_i1	alpha-Linolenic acid metabolism, Drug metabolism - other enzymes, Linoleic acid metabolism, Glycerophospholipid metabolism, Arachidonic acid metabolism, Ether lipid metabolism	map00592, map00983, map00591, map00564, map00590, map00565	6, 20, 1, 30, 11, 13	ec:1.3.3.6 - oxidase, ec:2.3.1.16 - C-acyltransferase, ec:3.1.1.32 - A1, ec:1.1.1.1 - dehydrogenase, ec:4.2.1.17 - hydratase, ec:3.1.1.4 - A2, ec:2.7.1.48 - kinase, ec:3.5.2.2 - hydantoinase, ec:3.1.1.1 - ali-esterase, ec:1.17.4.1 - reductase, ec:2.4.2.10 - phosphoribosyltransferase, ec:3.2.1.31 - beta-glucuronide glucuronohydrolase glucuronidase, ec:3.6.1.23 - diphosphatase, ec:3.5.4.5 - deamina…
TRINITY_DN89297_c0_g1_i1	Purine metabolism, Thiamine metabolism	map00230, map00730	54, 7	ec:3.6.1.15 - phosphatase, ec:4.6.1.2 - cyclase, ec:3.1.4.35 - phosphodiesterase, ec:3.5.4.10 - cyclohydrolase, ec:3.1.5.1 - deoxy-GTPase, ec:3.6.1.9 - diphosphatase, ec:3.5.4.3 - deaminase, ec:3.6.1.17 - (asymmetrical), ec:1.17.4.1 - reductase, ec:3.6.1.3 - adenylpyrophosphatase, ec:3.1.4.17 - phosphodiesterase, ec:4.3.2.2 - lyase, ec:1.7.1.7 - reductase, ec:1.17.1.4 - dehydrogenase, ec:2.7.7.4 …
TRINITY_DN238660_c0_g1_i1	Drug metabolism - other enzymes, Nitrotoluene degradation, Caffeine metabolism	map00983, map00633, map00232	20, 1, 3	ec:2.7.1.48 - kinase, ec:3.5.2.2 - hydantoinase, ec:3.1.1.1 - ali-esterase, ec:1.17.4.1 - reductase, ec:2.4.2.10 - phosphoribosyltransferase, ec:3.2.1.31 - beta-glucuronide glucuronohydrolase glucuronidase, ec:3.6.1.23 - diphosphatase, ec:3.5.4.5 - deaminase, ec:6.3.5.2 - synthase (glutamine-hydrolysing), ec:2.3.1.5 - N-acetyltransferase, ec:2.4.1.17 - 1-naphthol glucuronyltransferase, ec:2.4.2.8…
TRINITY_DN71894_c0_g2_i4	Purine metabolism, Thiamine metabolism	map00230, map00730	54, 7	ec:3.6.1.15 - phosphatase, ec:4.6.1.2 - cyclase, ec:3.1.4.35 - phosphodiesterase, ec:3.5.4.10 - cyclohydrolase, ec:3.1.5.1 - deoxy-GTPase, ec:3.6.1.9 - diphosphatase, ec:3.5.4.3 - deaminase, ec:3.6.1.17 - (asymmetrical), ec:1.17.4.1 - reductase, ec:3.6.1.3 - adenylpyrophosphatase, ec:3.1.4.17 - phosphodiesterase, ec:4.3.2.2 - lyase, ec:1.7.1.7 - reductase, ec:1.17.1.4 - dehydrogenase, ec:2.7.7.4 …
TRINITY_DN71894_c0_g2_i3	Purine metabolism, Thiamine metabolism	map00230, map00730	54, 7	ec:3.6.1.15 - phosphatase, ec:4.6.1.2 - cyclase, ec:3.1.4.35 - phosphodiesterase, ec:3.5.4.10 - cyclohydrolase, ec:3.1.5.1 - deoxy-GTPase, ec:3.6.1.9 - diphosphatase, ec:3.5.4.3 - deaminase, ec:3.6.1.17 - (asymmetrical), ec:1.17.4.1 - reductase, ec:3.6.1.3 - adenylpyrophosphatase, ec:3.1.4.17 - phosphodiesterase, ec:4.3.2.2 - lyase, ec:1.7.1.7 - reductase, ec:1.17.1.4 - dehydrogenase, ec:2.7.7.4 …
TRINITY_DN47109_c0_g1_i1	Histidine metabolism	map00340	8	ec:1.2.1.3 - dehydrogenase (NAD+), ec:1.2.1.5 - dehydrogenase [NAD(P)+], ec:2.1.1.8 - N-methyltransferase, ec:2.1.1.22 - N-methyltransferase, ec:4.2.1.49 - hydratase, ec:4.1.1.22 - decarboxylase, ec:4.3.1.3 - ammonia-lyase, ec:6.3.2.11 - synthase
TRINITY_DN4275_c0_g1_i14	Aminoacyl-tRNA biosynthesis, One carbon pool by folate	map00970, map00670	22, 15	ec:6.1.1.22 - ligase, ec:6.1.1.19 - ligase, ec:2.1.2.9 - formyltransferase, ec:6.1.1.9 - ligase, ec:6.1.1.3 - ligase, ec:6.1.1.15 - ligase, ec:6.1.1.5 - ligase, ec:6.1.1.10 - ligase, ec:6.1.1.21 - ligase, ec:6.1.1.18 - ligase, ec:6.1.1.7 - ligase, ec:6.1.1.12 - ligase, ec:6.1.1.2 - ligase, ec:6.3.5.7 - synthase (glutamine-hydrolysing), ec:6.1.1.14 - ligase, ec:6.1.1.4 - ligase, ec:6.1.1.20 - liga…
TRINITY_DN410_c0_g1_i10	Purine metabolism, Thiamine metabolism	map00230, map00730	54, 7	ec:3.6.1.15 - phosphatase, ec:4.6.1.2 - cyclase, ec:3.1.4.35 - phosphodiesterase, ec:3.5.4.10 - cyclohydrolase, ec:3.1.5.1 - deoxy-GTPase, ec:3.6.1.9 - diphosphatase, ec:3.5.4.3 - deaminase, ec:3.6.1.17 - (asymmetrical), ec:1.17.4.1 - reductase, ec:3.6.1.3 - adenylpyrophosphatase, ec:3.1.4.17 - phosphodiesterase, ec:4.3.2.2 - lyase, ec:1.7.1.7 - reductase, ec:1.17.1.4 - dehydrogenase, ec:2.7.7.4 …
TRINITY_DN71894_c0_g2_i2	Purine metabolism, Thiamine metabolism	map00230, map00730	54, 7	ec:3.6.1.15 - phosphatase, ec:4.6.1.2 - cyclase, ec:3.1.4.35 - phosphodiesterase, ec:3.5.4.10 - cyclohydrolase, ec:3.1.5.1 - deoxy-GTPase, ec:3.6.1.9 - diphosphatase, ec:3.5.4.3 - deaminase, ec:3.6.1.17 - (asymmetrical), ec:1.17.4.1 - reductase, ec:3.6.1.3 - adenylpyrophosphatase, ec:3.1.4.17 - phosphodiesterase, ec:4.3.2.2 - lyase, ec:1.7.1.7 - reductase, ec:1.17.1.4 - dehydrogenase, ec:2.7.7.4 …
TRINITY_DN4275_c0_g1_i11	Aminoacyl-tRNA biosynthesis, One carbon pool by folate	map00970, map00670	22, 15	ec:6.1.1.22 - ligase, ec:6.1.1.19 - ligase, ec:2.1.2.9 - formyltransferase, ec:6.1.1.9 - ligase, ec:6.1.1.3 - ligase, ec:6.1.1.15 - ligase, ec:6.1.1.5 - ligase, ec:6.1.1.10 - ligase, ec:6.1.1.21 - ligase, ec:6.1.1.18 - ligase, ec:6.1.1.7 - ligase, ec:6.1.1.12 - ligase, ec:6.1.1.2 - ligase, ec:6.3.5.7 - synthase (glutamine-hydrolysing), ec:6.1.1.14 - ligase, ec:6.1.1.4 - ligase, ec:6.1.1.20 - liga…
TRINITY_DN410_c0_g1_i13	Purine metabolism, Thiamine metabolism	map00230, map00730	54, 7	ec:3.6.1.15 - phosphatase, ec:4.6.1.2 - cyclase, ec:3.1.4.35 - phosphodiesterase, ec:3.5.4.10 - cyclohydrolase, ec:3.1.5.1 - deoxy-GTPase, ec:3.6.1.9 - diphosphatase, ec:3.5.4.3 - deaminase, ec:3.6.1.17 - (asymmetrical), ec:1.17.4.1 - reductase, ec:3.6.1.3 - adenylpyrophosphatase, ec:3.1.4.17 - phosphodiesterase, ec:4.3.2.2 - lyase, ec:1.7.1.7 - reductase, ec:1.17.1.4 - dehydrogenase, ec:2.7.7.4 …
TRINITY_DN410_c0_g1_i14	Purine metabolism, Thiamine metabolism	map00230, map00730	54, 7	ec:3.6.1.15 - phosphatase, ec:4.6.1.2 - cyclase, ec:3.1.4.35 - phosphodiesterase, ec:3.5.4.10 - cyclohydrolase, ec:3.1.5.1 - deoxy-GTPase, ec:3.6.1.9 - diphosphatase, ec:3.5.4.3 - deaminase, ec:3.6.1.17 - (asymmetrical), ec:1.17.4.1 - reductase, ec:3.6.1.3 - adenylpyrophosphatase, ec:3.1.4.17 - phosphodiesterase, ec:4.3.2.2 - lyase, ec:1.7.1.7 - reductase, ec:1.17.1.4 - dehydrogenase, ec:2.7.7.4 …
TRINITY_DN4275_c0_g1_i13	Aminoacyl-tRNA biosynthesis, One carbon pool by folate	map00970, map00670	22, 15	ec:6.1.1.22 - ligase, ec:6.1.1.19 - ligase, ec:2.1.2.9 - formyltransferase, ec:6.1.1.9 - ligase, ec:6.1.1.3 - ligase, ec:6.1.1.15 - ligase, ec:6.1.1.5 - ligase, ec:6.1.1.10 - ligase, ec:6.1.1.21 - ligase, ec:6.1.1.18 - ligase, ec:6.1.1.7 - ligase, ec:6.1.1.12 - ligase, ec:6.1.1.2 - ligase, ec:6.3.5.7 - synthase (glutamine-hydrolysing), ec:6.1.1.14 - ligase, ec:6.1.1.4 - ligase, ec:6.1.1.20 - liga…
TRINITY_DN410_c0_g1_i11	Purine metabolism, Thiamine metabolism	map00230, map00730	54, 7	ec:3.6.1.15 - phosphatase, ec:4.6.1.2 - cyclase, ec:3.1.4.35 - phosphodiesterase, ec:3.5.4.10 - cyclohydrolase, ec:3.1.5.1 - deoxy-GTPase, ec:3.6.1.9 - diphosphatase, ec:3.5.4.3 - deaminase, ec:3.6.1.17 - (asymmetrical), ec:1.17.4.1 - reductase, ec:3.6.1.3 - adenylpyrophosphatase, ec:3.1.4.17 - phosphodiesterase, ec:4.3.2.2 - lyase, ec:1.7.1.7 - reductase, ec:1.17.1.4 - dehydrogenase, ec:2.7.7.4 …
TRINITY_DN4275_c0_g1_i12	Aminoacyl-tRNA biosynthesis, One carbon pool by folate	map00970, map00670	22, 15	ec:6.1.1.22 - ligase, ec:6.1.1.19 - ligase, ec:2.1.2.9 - formyltransferase, ec:6.1.1.9 - ligase, ec:6.1.1.3 - ligase, ec:6.1.1.15 - ligase, ec:6.1.1.5 - ligase, ec:6.1.1.10 - ligase, ec:6.1.1.21 - ligase, ec:6.1.1.18 - ligase, ec:6.1.1.7 - ligase, ec:6.1.1.12 - ligase, ec:6.1.1.2 - ligase, ec:6.3.5.7 - synthase (glutamine-hydrolysing), ec:6.1.1.14 - ligase, ec:6.1.1.4 - ligase, ec:6.1.1.20 - liga…
TRINITY_DN410_c0_g1_i12	Purine metabolism, Thiamine metabolism	map00230, map00730	54, 7	ec:3.6.1.15 - phosphatase, ec:4.6.1.2 - cyclase, ec:3.1.4.35 - phosphodiesterase, ec:3.5.4.10 - cyclohydrolase, ec:3.1.5.1 - deoxy-GTPase, ec:3.6.1.9 - diphosphatase, ec:3.5.4.3 - deaminase, ec:3.6.1.17 - (asymmetrical), ec:1.17.4.1 - reductase, ec:3.6.1.3 - adenylpyrophosphatase, ec:3.1.4.17 - phosphodiesterase, ec:4.3.2.2 - lyase, ec:1.7.1.7 - reductase, ec:1.17.1.4 - dehydrogenase, ec:2.7.7.4 …
TRINITY_DN23460_c0_g1_i21	Tryptophan metabolism	map00380	17	ec:3.5.1.4 - acylamidase, ec:1.2.1.3 - dehydrogenase (NAD+), ec:1.1.1.35 - dehydrogenase, ec:1.14.16.4 - 5-monooxygenase, ec:1.2.4.2 - dehydrogenase (succinyl-transferring), ec:2.3.1.61 - succinyltransferase, ec:1.8.1.4 - dehydrogenase, ec:4.1.1.45 - decarboxylase, ec:3.7.1.3 - ec:3.7.1.3 kynureninase, ec:1.13.11.6 - 3,4-dioxygenase, ec:1.14.13.9 - 3-monooxygenase, ec:2.6.1.7 - transaminase, ec:2…
TRINITY_DN5826_c0_g1_i17	Drug metabolism - other enzymes	map00983	20	ec:2.7.1.48 - kinase, ec:3.5.2.2 - hydantoinase, ec:3.1.1.1 - ali-esterase, ec:1.17.4.1 - reductase, ec:2.4.2.10 - phosphoribosyltransferase, ec:3.2.1.31 - beta-glucuronide glucuronohydrolase glucuronidase, ec:3.6.1.23 - diphosphatase, ec:3.5.4.5 - deaminase, ec:6.3.5.2 - synthase (glutamine-hydrolysing), ec:2.3.1.5 - N-acetyltransferase, ec:2.4.1.17 - 1-naphthol glucuronyltransferase, ec:2.4.2.8…
TRINITY_DN5826_c0_g1_i18	Drug metabolism - other enzymes	map00983	20	ec:2.7.1.48 - kinase, ec:3.5.2.2 - hydantoinase, ec:3.1.1.1 - ali-esterase, ec:1.17.4.1 - reductase, ec:2.4.2.10 - phosphoribosyltransferase, ec:3.2.1.31 - beta-glucuronide glucuronohydrolase glucuronidase, ec:3.6.1.23 - diphosphatase, ec:3.5.4.5 - deaminase, ec:6.3.5.2 - synthase (glutamine-hydrolysing), ec:2.3.1.5 - N-acetyltransferase, ec:2.4.1.17 - 1-naphthol glucuronyltransferase, ec:2.4.2.8…
TRINITY_DN39218_c0_g1_i1	Terpenoid backbone biosynthesis	map00900	16	ec:2.7.4.2 - kinase, ec:2.5.1.84 - diphosphate synthase [geranyl-diphosphate specific], ec:1.8.3.5 - oxidase, ec:2.3.3.10 - synthase, ec:2.5.1.58 - farnesyltransferase, ec:2.7.1.36 - kinase, ec:1.1.1.34 - reductase (NADPH), ec:2.1.1.100 - O-methyltransferase, ec:4.1.1.33 - decarboxylase, ec:2.5.1.10 - diphosphate synthase, ec:2.5.1.85 - diphosphate synthase [geranylgeranyl-diphosphate specific], …
TRINITY_DN5826_c0_g1_i16	Drug metabolism - other enzymes	map00983	20	ec:2.7.1.48 - kinase, ec:3.5.2.2 - hydantoinase, ec:3.1.1.1 - ali-esterase, ec:1.17.4.1 - reductase, ec:2.4.2.10 - phosphoribosyltransferase, ec:3.2.1.31 - beta-glucuronide glucuronohydrolase glucuronidase, ec:3.6.1.23 - diphosphatase, ec:3.5.4.5 - deaminase, ec:6.3.5.2 - synthase (glutamine-hydrolysing), ec:2.3.1.5 - N-acetyltransferase, ec:2.4.1.17 - 1-naphthol glucuronyltransferase, ec:2.4.2.8…
TRINITY_DN39218_c0_g1_i3	Terpenoid backbone biosynthesis	map00900	16	ec:2.7.4.2 - kinase, ec:2.5.1.84 - diphosphate synthase [geranyl-diphosphate specific], ec:1.8.3.5 - oxidase, ec:2.3.3.10 - synthase, ec:2.5.1.58 - farnesyltransferase, ec:2.7.1.36 - kinase, ec:1.1.1.34 - reductase (NADPH), ec:2.1.1.100 - O-methyltransferase, ec:4.1.1.33 - decarboxylase, ec:2.5.1.10 - diphosphate synthase, ec:2.5.1.85 - diphosphate synthase [geranylgeranyl-diphosphate specific], …
TRINITY_DN7796_c3_g1_i1	Pyruvate metabolism, Carbon fixation pathways in prokaryotes, Citrate cycle (TCA cycle)	map00620, map00720, map00020	24, 21, 17	ec:4.1.1.32 - carboxykinase (GTP), ec:1.2.1.3 - dehydrogenase (NAD+), ec:1.1.1.79 - reductase (NADP+), ec:2.3.1.12 - acetyltransferase, ec:6.2.1.1 - ligase, ec:1.8.1.4 - dehydrogenase, ec:4.1.1.112 - decarboxylase, ec:1.1.1.40 - dehydrogenase (oxaloacetate-decarboxylating) (NADP+), ec:1.1.1.37 - dehydrogenase, ec:2.8.3.1 - CoA-transferase, ec:3.1.2.1 - hydrolase, ec:1.1.1.39 - dehydrogenase (deca…
TRINITY_DN410_c0_g1_i15	Purine metabolism, Thiamine metabolism	map00230, map00730	54, 7	ec:3.6.1.15 - phosphatase, ec:4.6.1.2 - cyclase, ec:3.1.4.35 - phosphodiesterase, ec:3.5.4.10 - cyclohydrolase, ec:3.1.5.1 - deoxy-GTPase, ec:3.6.1.9 - diphosphatase, ec:3.5.4.3 - deaminase, ec:3.6.1.17 - (asymmetrical), ec:1.17.4.1 - reductase, ec:3.6.1.3 - adenylpyrophosphatase, ec:3.1.4.17 - phosphodiesterase, ec:4.3.2.2 - lyase, ec:1.7.1.7 - reductase, ec:1.17.1.4 - dehydrogenase, ec:2.7.7.4 …
TRINITY_DN90_c0_g1_i10	Folate biosynthesis	map00790	19	ec:3.4.19.9 - gamma-glutamyl hydrolase, ec:1.14.16.4 - 5-monooxygenase, ec:1.1.1.184 - reductase (NADPH), ec:2.7.7.75 - adenylyltransferase, ec:1.1.1.21 - reductase, ec:4.2.3.12 - synthase, ec:1.14.16.1 - 4-monooxygenase, ec:2.10.1.1 - molybdotransferase, ec:4.2.1.96 - dehydratase, ec:2.8.1.12 - synthase, ec:1.5.1.34 - reductase, ec:1.1.1.153 - reductase (L-erythro-7,8-dihydrobiopterin forming), …
TRINITY_DN39218_c0_g1_i4	Terpenoid backbone biosynthesis	map00900	16	ec:2.7.4.2 - kinase, ec:2.5.1.84 - diphosphate synthase [geranyl-diphosphate specific], ec:1.8.3.5 - oxidase, ec:2.3.3.10 - synthase, ec:2.5.1.58 - farnesyltransferase, ec:2.7.1.36 - kinase, ec:1.1.1.34 - reductase (NADPH), ec:2.1.1.100 - O-methyltransferase, ec:4.1.1.33 - decarboxylase, ec:2.5.1.10 - diphosphate synthase, ec:2.5.1.85 - diphosphate synthase [geranylgeranyl-diphosphate specific], …
TRINITY_DN90_c0_g1_i11	Folate biosynthesis	map00790	19	ec:3.4.19.9 - gamma-glutamyl hydrolase, ec:1.14.16.4 - 5-monooxygenase, ec:1.1.1.184 - reductase (NADPH), ec:2.7.7.75 - adenylyltransferase, ec:1.1.1.21 - reductase, ec:4.2.3.12 - synthase, ec:1.14.16.1 - 4-monooxygenase, ec:2.10.1.1 - molybdotransferase, ec:4.2.1.96 - dehydratase, ec:2.8.1.12 - synthase, ec:1.5.1.34 - reductase, ec:1.1.1.153 - reductase (L-erythro-7,8-dihydrobiopterin forming), …
TRINITY_DN39218_c0_g1_i5	Terpenoid backbone biosynthesis	map00900	16	ec:2.7.4.2 - kinase, ec:2.5.1.84 - diphosphate synthase [geranyl-diphosphate specific], ec:1.8.3.5 - oxidase, ec:2.3.3.10 - synthase, ec:2.5.1.58 - farnesyltransferase, ec:2.7.1.36 - kinase, ec:1.1.1.34 - reductase (NADPH), ec:2.1.1.100 - O-methyltransferase, ec:4.1.1.33 - decarboxylase, ec:2.5.1.10 - diphosphate synthase, ec:2.5.1.85 - diphosphate synthase [geranylgeranyl-diphosphate specific], …
TRINITY_DN90_c0_g1_i12	Folate biosynthesis	map00790	19	ec:3.4.19.9 - gamma-glutamyl hydrolase, ec:1.14.16.4 - 5-monooxygenase, ec:1.1.1.184 - reductase (NADPH), ec:2.7.7.75 - adenylyltransferase, ec:1.1.1.21 - reductase, ec:4.2.3.12 - synthase, ec:1.14.16.1 - 4-monooxygenase, ec:2.10.1.1 - molybdotransferase, ec:4.2.1.96 - dehydratase, ec:2.8.1.12 - synthase, ec:1.5.1.34 - reductase, ec:1.1.1.153 - reductase (L-erythro-7,8-dihydrobiopterin forming), …
TRINITY_DN90_c0_g1_i13	Folate biosynthesis	map00790	19	ec:3.4.19.9 - gamma-glutamyl hydrolase, ec:1.14.16.4 - 5-monooxygenase, ec:1.1.1.184 - reductase (NADPH), ec:2.7.7.75 - adenylyltransferase, ec:1.1.1.21 - reductase, ec:4.2.3.12 - synthase, ec:1.14.16.1 - 4-monooxygenase, ec:2.10.1.1 - molybdotransferase, ec:4.2.1.96 - dehydratase, ec:2.8.1.12 - synthase, ec:1.5.1.34 - reductase, ec:1.1.1.153 - reductase (L-erythro-7,8-dihydrobiopterin forming), …
TRINITY_DN90_c0_g1_i14	Folate biosynthesis	map00790	19	ec:3.4.19.9 - gamma-glutamyl hydrolase, ec:1.14.16.4 - 5-monooxygenase, ec:1.1.1.184 - reductase (NADPH), ec:2.7.7.75 - adenylyltransferase, ec:1.1.1.21 - reductase, ec:4.2.3.12 - synthase, ec:1.14.16.1 - 4-monooxygenase, ec:2.10.1.1 - molybdotransferase, ec:4.2.1.96 - dehydratase, ec:2.8.1.12 - synthase, ec:1.5.1.34 - reductase, ec:1.1.1.153 - reductase (L-erythro-7,8-dihydrobiopterin forming), …
TRINITY_DN23460_c0_g1_i14	Tryptophan metabolism	map00380	17	ec:3.5.1.4 - acylamidase, ec:1.2.1.3 - dehydrogenase (NAD+), ec:1.1.1.35 - dehydrogenase, ec:1.14.16.4 - 5-monooxygenase, ec:1.2.4.2 - dehydrogenase (succinyl-transferring), ec:2.3.1.61 - succinyltransferase, ec:1.8.1.4 - dehydrogenase, ec:4.1.1.45 - decarboxylase, ec:3.7.1.3 - ec:3.7.1.3 kynureninase, ec:1.13.11.6 - 3,4-dioxygenase, ec:1.14.13.9 - 3-monooxygenase, ec:2.6.1.7 - transaminase, ec:2…
TRINITY_DN23460_c0_g1_i16	Tryptophan metabolism	map00380	17	ec:3.5.1.4 - acylamidase, ec:1.2.1.3 - dehydrogenase (NAD+), ec:1.1.1.35 - dehydrogenase, ec:1.14.16.4 - 5-monooxygenase, ec:1.2.4.2 - dehydrogenase (succinyl-transferring), ec:2.3.1.61 - succinyltransferase, ec:1.8.1.4 - dehydrogenase, ec:4.1.1.45 - decarboxylase, ec:3.7.1.3 - ec:3.7.1.3 kynureninase, ec:1.13.11.6 - 3,4-dioxygenase, ec:1.14.13.9 - 3-monooxygenase, ec:2.6.1.7 - transaminase, ec:2…
TRINITY_DN13643_c0_g2_i1	Purine metabolism, Thiamine metabolism	map00230, map00730	54, 7	ec:3.6.1.15 - phosphatase, ec:4.6.1.2 - cyclase, ec:3.1.4.35 - phosphodiesterase, ec:3.5.4.10 - cyclohydrolase, ec:3.1.5.1 - deoxy-GTPase, ec:3.6.1.9 - diphosphatase, ec:3.5.4.3 - deaminase, ec:3.6.1.17 - (asymmetrical), ec:1.17.4.1 - reductase, ec:3.6.1.3 - adenylpyrophosphatase, ec:3.1.4.17 - phosphodiesterase, ec:4.3.2.2 - lyase, ec:1.7.1.7 - reductase, ec:1.17.1.4 - dehydrogenase, ec:2.7.7.4 …
TRINITY_DN13643_c0_g2_i3	Purine metabolism, Thiamine metabolism	map00230, map00730	54, 7	ec:3.6.1.15 - phosphatase, ec:4.6.1.2 - cyclase, ec:3.1.4.35 - phosphodiesterase, ec:3.5.4.10 - cyclohydrolase, ec:3.1.5.1 - deoxy-GTPase, ec:3.6.1.9 - diphosphatase, ec:3.5.4.3 - deaminase, ec:3.6.1.17 - (asymmetrical), ec:1.17.4.1 - reductase, ec:3.6.1.3 - adenylpyrophosphatase, ec:3.1.4.17 - phosphodiesterase, ec:4.3.2.2 - lyase, ec:1.7.1.7 - reductase, ec:1.17.1.4 - dehydrogenase, ec:2.7.7.4 …
TRINITY_DN5826_c0_g1_i13	Drug metabolism - other enzymes	map00983	20	ec:2.7.1.48 - kinase, ec:3.5.2.2 - hydantoinase, ec:3.1.1.1 - ali-esterase, ec:1.17.4.1 - reductase, ec:2.4.2.10 - phosphoribosyltransferase, ec:3.2.1.31 - beta-glucuronide glucuronohydrolase glucuronidase, ec:3.6.1.23 - diphosphatase, ec:3.5.4.5 - deaminase, ec:6.3.5.2 - synthase (glutamine-hydrolysing), ec:2.3.1.5 - N-acetyltransferase, ec:2.4.1.17 - 1-naphthol glucuronyltransferase, ec:2.4.2.8…
TRINITY_DN5826_c0_g1_i14	Drug metabolism - other enzymes	map00983	20	ec:2.7.1.48 - kinase, ec:3.5.2.2 - hydantoinase, ec:3.1.1.1 - ali-esterase, ec:1.17.4.1 - reductase, ec:2.4.2.10 - phosphoribosyltransferase, ec:3.2.1.31 - beta-glucuronide glucuronohydrolase glucuronidase, ec:3.6.1.23 - diphosphatase, ec:3.5.4.5 - deaminase, ec:6.3.5.2 - synthase (glutamine-hydrolysing), ec:2.3.1.5 - N-acetyltransferase, ec:2.4.1.17 - 1-naphthol glucuronyltransferase, ec:2.4.2.8…
TRINITY_DN23460_c0_g1_i11	Tryptophan metabolism	map00380	17	ec:3.5.1.4 - acylamidase, ec:1.2.1.3 - dehydrogenase (NAD+), ec:1.1.1.35 - dehydrogenase, ec:1.14.16.4 - 5-monooxygenase, ec:1.2.4.2 - dehydrogenase (succinyl-transferring), ec:2.3.1.61 - succinyltransferase, ec:1.8.1.4 - dehydrogenase, ec:4.1.1.45 - decarboxylase, ec:3.7.1.3 - ec:3.7.1.3 kynureninase, ec:1.13.11.6 - 3,4-dioxygenase, ec:1.14.13.9 - 3-monooxygenase, ec:2.6.1.7 - transaminase, ec:2…
TRINITY_DN5826_c0_g1_i11	Drug metabolism - other enzymes	map00983	20	ec:2.7.1.48 - kinase, ec:3.5.2.2 - hydantoinase, ec:3.1.1.1 - ali-esterase, ec:1.17.4.1 - reductase, ec:2.4.2.10 - phosphoribosyltransferase, ec:3.2.1.31 - beta-glucuronide glucuronohydrolase glucuronidase, ec:3.6.1.23 - diphosphatase, ec:3.5.4.5 - deaminase, ec:6.3.5.2 - synthase (glutamine-hydrolysing), ec:2.3.1.5 - N-acetyltransferase, ec:2.4.1.17 - 1-naphthol glucuronyltransferase, ec:2.4.2.8…
TRINITY_DN23460_c0_g1_i12	Tryptophan metabolism	map00380	17	ec:3.5.1.4 - acylamidase, ec:1.2.1.3 - dehydrogenase (NAD+), ec:1.1.1.35 - dehydrogenase, ec:1.14.16.4 - 5-monooxygenase, ec:1.2.4.2 - dehydrogenase (succinyl-transferring), ec:2.3.1.61 - succinyltransferase, ec:1.8.1.4 - dehydrogenase, ec:4.1.1.45 - decarboxylase, ec:3.7.1.3 - ec:3.7.1.3 kynureninase, ec:1.13.11.6 - 3,4-dioxygenase, ec:1.14.13.9 - 3-monooxygenase, ec:2.6.1.7 - transaminase, ec:2…
TRINITY_DN111393_c2_g1_i1	T cell receptor signaling pathway, PD-L1 expression and PD-1 checkpoint pathway in cancer, Th1 and Th2 cell differentiation	map04660, map05235, map04658	2, 1, 1	ec:2.7.10.2 - protein-tyrosine kinase, ec:3.1.3.16 - phosphatase, ec:3.1.3.16 - phosphatase, ec:3.1.3.16 - phosphatase
TRINITY_DN915_c1_g1_i5	Purine metabolism	map00230	54	ec:3.6.1.15 - phosphatase, ec:4.6.1.2 - cyclase, ec:3.1.4.35 - phosphodiesterase, ec:3.5.4.10 - cyclohydrolase, ec:3.1.5.1 - deoxy-GTPase, ec:3.6.1.9 - diphosphatase, ec:3.5.4.3 - deaminase, ec:3.6.1.17 - (asymmetrical), ec:1.17.4.1 - reductase, ec:3.6.1.3 - adenylpyrophosphatase, ec:3.1.4.17 - phosphodiesterase, ec:4.3.2.2 - lyase, ec:1.7.1.7 - reductase, ec:1.17.1.4 - dehydrogenase, ec:2.7.7.4 …
TRINITY_DN915_c1_g1_i8	Purine metabolism	map00230	54	ec:3.6.1.15 - phosphatase, ec:4.6.1.2 - cyclase, ec:3.1.4.35 - phosphodiesterase, ec:3.5.4.10 - cyclohydrolase, ec:3.1.5.1 - deoxy-GTPase, ec:3.6.1.9 - diphosphatase, ec:3.5.4.3 - deaminase, ec:3.6.1.17 - (asymmetrical), ec:1.17.4.1 - reductase, ec:3.6.1.3 - adenylpyrophosphatase, ec:3.1.4.17 - phosphodiesterase, ec:4.3.2.2 - lyase, ec:1.7.1.7 - reductase, ec:1.17.1.4 - dehydrogenase, ec:2.7.7.4 …
[truncated: 13,655 more rows]

## Sheet: kegg_chmy_blood_bypath
Pathway	Pathway ID	#Enzs in Pathway	Enzyme	#Seqs of Enzyme	Seqs
[truncated: 140 more rows]

[truncated: 2 more sheets: kegg_dc_alltiss_byseq, kegg_dc_alltiss_bypath]
