# Supplementary material for: Species and population specific gene expression in blood transcriptomes of marine turtles
Source: BMC Genomics. 2021 May 13;22:346. doi: 10.1186/s12864-021-07656-5 (PMC8117300; doi:10.1186/s12864-021-07656-5)
Supplement: Supplementary file 7 — Additional file 7: Table S7. Differential orthogroup expression analyses results for comparisons between marine turtle species. Log fold change and adjusted p-values are listed for the green v. leatherback, green v. hawksbill, and leatherback v. hawksbill turtle comparisons. [file 12864_2021_7656_MOESM7_ESM.xlsx]

## Sheet: Table S7
	green v. leatherback		green v. hawksbill		leatherback v. hawksbill
Orthogroup	logFC	adj.P.Val	logFC	adj.P.Val	logFC	adj.P.Val
OG0000000	-1.50978	0.0806344	-3.12253	0.00405933	-1.61275	0.0373078
OG0000002	5.208	0.00207412	5.24956	0.00627871	0.041562	0.982827
OG0000003	-0.352329	0.330712	3.92667	0.00265158	4.279	0.00180538
OG0000004	-5.45189	0.000102848	0.754501	0.482759	6.20639	0.000285573
OG0000006	2.15762	0.0408542	-0.0658744	0.949451	-2.22349	0.0576778
OG0000007	0.793463	0.622807	-5.74496	0.00297626	-6.53842	0.00180958
OG0000008	-2.02837	0.0102734	-2.91003	0.00241583	-0.88166	0.0852414
OG0000009	8.68489	0.000100037	6.07486	0.000728652	-2.61002	0.0978816
OG0000011	3.15229	0.0480831	2.01836	0.214986	-1.13394	0.52871
OG0000012	-0.932124	0.120577	0.0315447	0.968646	0.963669	0.172188
OG0000014	2.9587	0.00559451	1.96967	0.0505413	-0.989032	0.329294
OG0000015	0.0452928	0.963538	-2.50695	0.0165611	-2.55225	0.0155246
OG0000016	2.11757	0.0248513	1.38514	0.146572	-0.73243	0.470779
OG0000017	0.853884	0.300951	-1.05842	0.166433	-1.9123	0.0375315
OG0000018	-1.20771	0.037656	-1.34349	0.0375362	-0.135782	0.778594
OG0000020	-4.06404	0.0827667	0.422568	0.90896	4.48661	0.136913
OG0000021	3.04352	0.368978	0.321578	0.931487	-2.72194	0.486858
OG0000022	-4.61887	0.00107143	-3.76531	0.0067061	0.853562	0.282568
OG0000024	8.97603	4.51917e-05	5.5579	0.000665526	-3.41813	0.0232856
OG0000025	1.4993	0.0140736	0.351972	0.481641	-1.14733	0.0717167
OG0000026	3.29216	0.00264654	-0.302495	0.681382	-3.59466	0.00310297
OG0000027	-0.432184	0.398312	7.54691	0.000508079	7.9791	0.000371026
OG0000029	1.59522	0.22333	-0.374502	0.76984	-1.96972	0.169697
OG0000030	-0.418057	0.557711	-5.38319	9.20346e-05	-4.96513	8.67764e-05
OG0000031	0.443952	0.711632	3.22563	0.0650486	2.78168	0.107382
OG0000032	-1.9346	0.363392	-7.71968	0.00255063	-5.78509	0.00509301
OG0000033	-1.84814	0.0111902	0.991241	0.264839	2.83938	0.00657225
OG0000034	3.37767	0.0109266	1.70512	0.153934	-1.67255	0.21414
OG0000035	6.3491	0.000150947	1.76234	0.0225362	-4.58676	0.00223998
OG0000037	-3.88258	0.0112164	-2.15109	0.163141	1.73149	0.203606
OG0000038	4.88208	0.000390752	5.23442	0.00128036	0.352337	0.790966
OG0000039	-1.26731	0.234154	-1.36259	0.256051	-0.0952755	0.930275
OG0000040	2.35571	0.305817	2.83873	0.320947	0.483015	0.88698
OG0000041	-4.98444	0.0259858	-1.09476	0.690259	3.88968	0.0943058
OG0000042	1.39661	0.00454469	2.32379	0.00371887	0.927183	0.147897
OG0000043	1.46466	0.0903196	3.55573	0.0111784	2.09107	0.098686
OG0000045	-5.73168	0.0156647	-3.91391	0.117336	1.81777	0.251975
OG0000046	4.89946	0.0140736	6.27413	0.0229659	1.37468	0.632494
OG0000047	1.93979	0.0180909	-1.0342	0.0592804	-2.97399	0.00307401
OG0000048	-3.4151	0.0389577	-7.13458	0.00117256	-3.71948	0.0131856
OG0000049	2.93361	0.115679	-0.864057	0.645592	-3.79766	0.0739991
OG0000050	4.43385	0.0349264	-0.102674	0.924241	-4.53653	0.0414619
OG0000053	-6.38975	0.000438926	-8.66374	0.000129823	-2.27399	0.00642121
OG0000054	10.4071	0.000416941	5.48868	0.00323462	-4.91844	0.0424565
OG0000055	3.02692	0.0991548	3.85853	0.105987	0.83161	0.762416
OG0000056	-3.85176	0.0115188	-3.97052	0.0163315	-0.118758	0.919907
OG0000057	1.47562	0.0507694	3.65525	0.00587364	2.17964	0.0626593
OG0000058	-6.73524	9.26204e-05	-4.86839	0.000975673	1.86686	0.005228
OG0000059	-2.06181	0.0507595	-4.36904	0.00251795	-2.30723	0.0318831
OG0000060	-3.84847	0.000491844	-1.74904	0.0482427	2.09943	0.00475656
OG0000061	-0.0833088	0.814595	15.0475	0.00195045	15.1309	0.00205409
OG0000062	2.98733	0.0111072	2.13975	0.0675307	-0.847573	0.482399
OG0000063	1.40008	0.622998	-5.68833	0.0239601	-7.08841	0.0140136
OG0000064	-0.544385	0.486518	0.404056	0.708475	0.948441	0.34186
OG0000065	-0.0761068	0.89495	-1.04333	0.0821915	-0.967227	0.0899825
OG0000066	-10.4018	1.8821e-05	-10.9002	3.99032e-05	-0.4984	0.042787
OG0000067	5.2266	0.012749	0.882515	0.553955	-4.34408	0.0514939
OG0000068	-0.148371	0.833023	1.85705	0.0647335	2.00542	0.0490668
OG0000069	7.4145	0.000177092	0.525545	0.396525	-6.88895	0.000493085
OG0000070	-5.16916	0.00176103	-3.22071	0.0413457	1.94845	0.0805378
OG0000071	2.32835	0.00920445	0.0034756	0.99608	-2.32487	0.0165991
OG0000072	1.264	0.676871	-3.76277	0.141345	-5.02677	0.0789327
OG0000073	-4.37871	0.0470735	1.39647	0.685787	5.77518	0.0627664
OG0000075	2.42853	0.0873592	-2.63086	0.0627954	-5.05939	0.00577134
OG0000076	0.495151	0.505886	-0.992299	0.197513	-1.48745	0.0761062
OG0000078	0.459991	0.276789	-2.11002	0.000890751	-2.57001	0.000424648
OG0000079	6.58493	0.000215742	-4.48791	0.000129119	-11.0728	3.86637e-05
OG0000080	0.753205	0.446677	-2.58586	0.0085147	-3.33906	0.00468113
OG0000081	-10.6943	0.0509066	-4.57074	0.483137	6.12359	0.160076
OG0000082	6.26569	0.00036882	4.27147	0.00448154	-1.99423	0.153238
OG0000083	8.21031	4.22658e-05	-1.60604	0.00259803	-9.81634	3.98452e-05
OG0000084	9.07479	8.11288e-05	2.88525	0.000419107	-6.18954	0.000952322
OG0000085	0.605052	0.245502	1.45804	0.0578892	0.852985	0.248319
OG0000086	-2.84938	0.0970584	-1.94321	0.325407	0.906171	0.582946
OG0000087	-6.86754	0.00264507	-2.84551	0.200519	4.02203	0.0437873
OG0000088	0.875091	0.0604021	3.6001	0.00139146	2.725	0.00628832
OG0000089	9.83173	0.00284947	0.688297	0.49741	-9.14343	0.00628575
OG0000090	10.1606	3.5096e-05	-0.725129	0.0328653	-10.8858	4.94572e-05
OG0000091	2.46214	0.118616	2.56058	0.165449	0.0984416	0.962738
OG0000092	2.21544	0.0239765	2.33789	0.0398588	0.122457	0.917087
OG0000093	5.25126	0.000785422	2.58993	0.024325	-2.66133	0.052566
OG0000095	-1.20308	0.190504	-0.905649	0.388752	0.297431	0.774366
OG0000096	-0.90676	0.52687	-2.42519	0.121585	-1.51843	0.295423
OG0000097	-6.75467	9.12643e-05	-6.6911	0.000163087	0.063576	0.816778
OG0000098	-2.8566	0.00117505	-1.38377	0.0775035	1.47283	0.0300031
OG0000099	-7.05313	0.000188033	-6.05953	0.000895	0.993593	0.163526
OG0000100	-3.66424	0.000375156	1.70793	0.0994597	5.37217	0.000443344
OG0000101	-0.842395	0.288038	-1.3125	0.145339	-0.470106	0.5794
OG0000102	1.39182	0.114982	-1.60988	0.05155	-3.00169	0.00614345
OG0000103	-5.86862	0.000317557	0.0321191	0.980349	5.90074	0.000975537
OG0000104	-10.3387	0.000108914	-2.90216	0.133959	7.43659	0.0010889
OG0000105	-9.55294	0.000509243	-5.47025	0.0227024	4.08268	0.0119294
OG0000106	-0.381863	0.744484	-7.07176	0.00020022	-6.68989	0.000199774
OG0000108	-5.91127	3.0152e-05	3.15928	0.0168652	9.07055	8.61518e-05
OG0000109	-5.8921	0.0336796	0.459851	0.912573	6.35195	0.0641135
OG0000110	-0.640401	0.647829	-3.84331	0.017274	-3.20291	0.0315675
OG0000111	2.18772	0.423991	-6.73871	0.00620738	-8.92643	0.00397558
OG0000112	3.14215	0.205353	1.24461	0.638533	-1.89753	0.515374
OG0000113	-2.51303	0.000144931	-0.182542	0.691769	2.33049	0.0005423
OG0000114	2.04482	0.105819	0.739298	0.542219	-1.30552	0.386709
OG0000115	3.1059	0.0685259	-5.27598	0.00251366	-8.38188	0.000486047
OG0000116	6.4215	6.42532e-05	7.47651	0.000183834	1.05501	0.364729
OG0000117	7.71753	2.59442e-05	-0.170216	0.430631	-7.88775	4.53077e-05
OG0000118	-6.2002	0.00798417	-3.45843	0.153533	2.74177	0.133943
OG0000119	2.81741	0.00467627	-3.42405	0.000145703	-6.24145	0.000103323
OG0000120	-1.00337	0.726093	1.07424	0.777443	2.07761	0.56015
OG0000121	3.33951	0.0358389	-1.43947	0.183112	-4.77897	0.00801075
OG0000122	-2.93816	0.00616708	-0.0592615	0.963746	2.8789	0.0168039
OG0000123	1.06355	0.150702	-1.2375	0.0583407	-2.30105	0.00965752
OG0000124	0.889358	0.00304087	0.0459888	0.850283	-0.843369	0.0082168
OG0000125	0.312597	0.374704	-0.750416	0.0537222	-1.06301	0.0155956
OG0000126	7.38802	0.000750849	2.98571	0.0146998	-4.40231	0.0236101
OG0000127	2.27079	0.315761	0.329967	0.875169	-1.94083	0.445614
OG0000128	-1.13322	0.462372	-3.61015	0.0271354	-2.47694	0.0500679
OG0000129	2.95069	0.0575606	1.86861	0.244118	-1.08208	0.547222
OG0000130	5.46617	0.124605	-3.48749	0.144821	-8.95367	0.0171766
OG0000132	-2.19871	0.0146956	2.05047	0.0984247	4.24919	0.00406798
OG0000133	1.43424	0.52525	-5.82753	0.00774193	-7.26178	0.00441465
OG0000135	0.410964	0.65786	-3.08459	0.00662692	-3.49555	0.00415561
OG0000136	0.242409	0.837986	8.28018	0.0220139	8.03777	0.0263647
OG0000137	3.11409	0.0047261	4.00328	0.00554663	0.889196	0.475182
OG0000138	1.03522	0.389198	2.67143	0.102046	1.63621	0.314964
OG0000139	-3.40633	0.1367	-5.45929	0.03227	-2.05295	0.0655726
OG0000140	8.04716	0.000631489	2.71067	0.00664485	-5.33649	0.0093266
OG0000141	3.45649	0.0252225	1.07	0.439052	-2.38649	0.149878
OG0000142	2.06159	0.0133312	1.2819	0.107984	-0.779689	0.382919
OG0000143	-1.21987	0.723198	-4.71885	0.129781	-3.49898	0.212902
OG0000144	6.86705	0.000365338	4.06699	0.000623438	-2.80006	0.0471435
OG0000145	6.67208	0.0033289	0.705028	0.539822	-5.96705	0.0109421
OG0000146	10.8737	1.98273e-05	10.6527	7.68355e-05	-0.221036	0.879404
OG0000147	8.88191	5.20953e-05	3.24049	0.00380061	-5.64142	0.00180813
OG0000148	-1.07418	0.012303	0.86079	0.12895	1.93497	0.00527207
OG0000149	-1.03234	0.00884669	2.74654	0.00551228	3.77888	0.00118586
OG0000150	-9.0712	0.000181551	-3.87155	0.037261	5.19965	0.00189006
OG0000151	3.64038	0.224554	1.61019	0.61526	-2.03018	0.582053
OG0000153	1.09755	0.0965363	6.46176	0.000910013	5.36421	0.0027733
OG0000154	1.96678	0.0445312	0.0403538	0.967921	-1.92643	0.0764843
OG0000155	7.55677	0.000917491	-0.37879	0.422185	-7.93556	0.00107638
OG0000156	4.64374	0.000624325	5.22418	0.00151548	0.580444	0.65777
OG0000157	-0.890145	0.157899	-2.50058	0.00289104	-1.61043	0.0115219
OG0000158	1.98213	0.0615505	2.35299	0.0669881	0.370864	0.780217
OG0000159	-1.2433	0.0124327	1.14369	0.0942978	2.38699	0.00397558
OG0000161	2.40356	0.0677063	2.52357	0.10156	0.120014	0.94498
OG0000162	0.73256	0.582465	2.77678	0.131591	2.04422	0.267999
OG0000163	2.01702	0.0422852	0.301672	0.755135	-1.71535	0.114203
OG0000165	0.595602	0.139457	1.49412	0.0216406	0.898515	0.131368
OG0000166	8.09666	3.92158e-05	7.87563	0.000154446	-0.221036	0.861697
OG0000167	-1.89604	0.00393823	-1.84192	0.00810257	0.0541248	0.900694
OG0000168	-4.03815	0.0156021	-5.66175	0.0034877	-1.6236	0.0841075
OG0000169	-2.57327	0.357216	-8.02686	0.00821997	-5.45359	0.0283143
OG0000170	1.74478	0.436236	2.37133	0.401972	0.62655	0.848347
OG0000171	-2.23427	0.0113906	-1.44085	0.110811	0.793418	0.234476
OG0000172	-3.15498	0.0280745	-0.133925	0.946576	3.02105	0.0658791
OG0000173	2.35491	0.254763	-1.82761	0.379426	-4.18253	0.0740559
OG0000174	-3.72635	0.00931023	-6.78778	0.000629823	-3.06142	0.000415642
OG0000175	5.66736	0.0117913	-0.759252	0.504832	-6.42661	0.00868725
OG0000176	3.82194	0.129315	-1.37256	0.450029	-5.19451	0.0504651
OG0000177	-1.8439	0.181581	-2.43235	0.104886	-0.588453	0.551498
OG0000178	-1.1777	0.207419	-3.80822	0.00207917	-2.63051	0.00440347
OG0000179	0.264313	0.722772	-1.08462	0.14109	-1.34893	0.0822
OG0000180	0.0916348	0.846421	-3.62402	9.70479e-05	-3.71566	7.08581e-05
OG0000181	2.66133	0.060145	4.68877	0.0277564	2.02745	0.331356
OG0000182	0.559019	0.840502	-5.78213	0.0230212	-6.34115	0.0182646
OG0000183	1.84977	0.132004	-5.39849	0.000964702	-7.24826	0.000286499
OG0000184	3.04129	0.421013	0.228798	0.955718	-2.81249	0.520295
OG0000185	0.362583	0.675534	5.12594	0.0438159	4.76336	0.0593968
OG0000186	0.394322	0.424208	3.13876	0.0151936	2.74444	0.0282865
OG0000187	2.94034	0.041952	-4.57739	0.00154855	-7.51773	0.000356797
OG0000188	-2.58716	0.00320035	6.41366	0.0018909	9.00082	0.000283907
OG0000189	3.15709	0.0391001	-3.42141	0.00507461	-6.5785	0.000988599
OG0000191	3.89537	0.00600962	-1.0333	0.282133	-4.92867	0.002941
OG0000193	-4.21449	0.00382497	-0.888356	0.549517	3.32613	0.0143436
OG0000194	-9.02107	2.72349e-05	-6.04559	0.000453238	2.97548	0.00116225
OG0000195	9.33855	0.000679759	5.42593	0.0112896	-3.91263	0.115121
OG0000196	-1.74797	0.477979	-4.02414	0.10151	-2.27617	0.176395
OG0000197	-0.53093	0.590244	-2.16431	0.0471574	-1.63338	0.100006
OG0000198	-0.641332	0.28199	-2.44562	0.00250977	-1.80429	0.00653081
OG0000199	2.79117	0.0235168	-5.59532	0.000210281	-8.3865	8.35557e-05
OG0000200	0.457152	0.73748	-1.40611	0.304774	-1.86326	0.193664
OG0000201	-5.20643	0.00359424	-2.4034	0.174291	2.80304	0.0497239
OG0000202	1.37427	0.0437909	9.59116	0.0014793	8.21689	0.00354938
OG0000203	3.014	0.00348239	4.0187	0.00379319	1.0047	0.383474
OG0000204	0.253155	0.809467	-8.89921	5.8036e-05	-9.15237	4.53077e-05
OG0000205	10.8385	1.8821e-05	2.33421	0.000489727	-8.50425	7.86029e-05
OG0000207	-0.0611625	0.888001	-5.47438	3.48585e-05	-5.41321	2.95552e-05
OG0000208	-7.71048	0.000741347	2.00952	0.379575	9.72	0.00114642
OG0000209	8.83645	7.00021e-05	-3.37048	8.44005e-05	-12.2069	3.98169e-05
OG0000210	-1.052	0.212314	-1.39268	0.144549	-0.340674	0.700261
OG0000211	6.14898	0.00895637	2.61704	0.128679	-3.53194	0.156327
OG0000212	-3.22201	0.190071	-7.61362	0.00611271	-4.39161	0.0302944
OG0000213	-0.508608	0.0889598	-0.932562	0.0142492	-0.423954	0.154453
OG0000214	-1.19467	0.43848	-5.83888	0.00213834	-4.6442	0.0040667
OG0000215	0.0627694	0.895477	0.487712	0.4112	0.424943	0.474366
OG0000216	-0.794247	0.0030672	-1.87352	0.000101844	-1.07928	0.000683026
OG0000217	-1.72151	0.00472813	2.07522	0.0529264	3.79673	0.00386228
OG0000218	0.949714	0.215321	-0.335792	0.653137	-1.28551	0.131624
OG0000219	4.50581	5.04584e-05	3.61039	0.000200957	-0.895426	0.169788
OG0000221	-0.755883	0.330712	-4.69052	0.000248351	-3.93464	0.00034011
OG0000222	-8.79525	0.000221149	-4.34019	0.0171464	4.45507	0.00120423
OG0000224	-0.364109	0.386572	-3.87819	6.60852e-05	-3.51408	4.94572e-05
OG0000225	-7.37763	0.000923969	-6.05877	0.00438513	1.31886	0.104561
OG0000226	0.253155	0.788014	-7.65493	7.43283e-05	-7.90809	5.79914e-05
OG0000227	-4.8899	0.0255241	-3.14294	0.158663	1.74696	0.172188
OG0000228	10.1974	0.000227873	8.87806	0.00110827	-1.31935	0.562455
OG0000229	-8.7015	0.000138477	-5.46597	0.0034877	3.23554	0.00273744
OG0000230	-8.64803	5.12986e-05	-9.83873	6.60852e-05	-1.1907	0.00858618
OG0000231	-8.29029	3.48596e-05	-12.2269	3.48585e-05	-3.93663	3.54463e-05
OG0000232	-7.24464	0.00217057	-0.193834	0.944727	7.05081	0.00810069
OG0000233	-6.13754	0.00113452	-5.55077	0.00358614	0.586772	0.486513
OG0000234	4.28207	0.0161483	1.04592	0.421752	-3.23615	0.0896107
OG0000235	-0.798807	0.311811	-0.531721	0.567546	0.267086	0.766163
OG0000236	6.62572	0.00048955	-0.522767	0.446675	-7.14848	0.000505068
OG0000237	7.80699	3.78448e-05	3.36098	0.00205852	-4.44601	0.00220181
OG0000239	3.90394	0.00457456	-1.61281	0.0977892	-5.51675	0.00120954
OG0000240	-3.04871	0.00714592	3.36119	0.0892312	6.4099	0.00546049
OG0000241	4.68751	0.00247228	1.0784	0.341735	-3.60912	0.0189498
OG0000242	-5.21546	0.00147595	-0.826483	0.580743	4.38898	0.00845017
OG0000243	5.03745	0.00421556	1.63802	0.198245	-3.39942	0.0511331
OG0000244	2.53644	0.0927808	0.415126	0.791227	-2.12131	0.208598
OG0000245	0.353517	0.448194	0.47474	0.393831	0.121223	0.840629
OG0000247	-3.47831	0.00204588	-2.02899	0.0508611	1.44932	0.0951631
OG0000248	4.99537	0.00163102	0.884932	0.388511	-4.11044	0.0093744
OG0000249	-2.85496	0.00483891	-0.667238	0.500829	2.18772	0.0295473
OG0000250	0.396299	0.637664	2.63888	0.0383533	2.24259	0.0710575
OG0000251	-5.67479	0.0043266	-5.82309	0.00509128	-0.148302	0.818241
OG0000252	6.86988	0.0171766	5.01056	0.0746685	-1.85932	0.597366
OG0000253	5.66084	0.000913705	2.91064	0.0230675	-2.75019	0.0710257
OG0000254	5.02827	0.000924675	3.12535	0.0160612	-1.90292	0.138248
OG0000255	2.52576	0.000629817	1.59806	0.00684555	-0.927697	0.122853
OG0000256	4.61371	0.00211912	2.71037	0.0321905	-1.90334	0.16266
OG0000257	4.76697	0.0166316	-2.58581	0.0726473	-7.35278	0.00226041
OG0000258	-8.78689	0.000115426	-5.20954	0.00337871	3.57735	0.000895711
OG0000259	-2.97613	0.0210938	-5.98485	0.000739611	-3.00871	0.00155532
OG0000260	-5.74806	0.00469067	1.05579	0.680789	6.80385	0.00964177
OG0000261	6.06234	0.0109547	2.62613	0.0340216	-3.43621	0.132181
OG0000262	-3.40767	0.0047553	-1.49095	0.194232	1.91671	0.072465
OG0000263	-0.748132	0.670654	-4.26722	0.0174005	-3.51908	0.0285377
OG0000264	-2.69581	0.301594	-3.59128	0.207811	-0.895465	0.731131
OG0000265	13.672	1.8821e-05	0.267429	0.189433	-13.4046	3.98169e-05
OG0000267	-6.44249	4.22624e-05	-5.4808	0.000164757	0.961694	0.00981113
OG0000268	3.0953	0.241519	3.48848	0.315525	0.393175	0.929287
OG0000269	-8.92795	6.16631e-05	-9.56686	8.6899e-05	-0.63891	0.075045
OG0000270	-11.7901	0.00509907	-5.43166	0.128789	6.35843	0.00127134
OG0000271	0.0726334	0.822772	3.03942	0.00267203	2.96679	0.00316465
OG0000272	6.9939	0.00582453	-1.83079	0.022679	-8.82469	0.00247802
OG0000273	4.45706	0.00214338	1.02219	0.297637	-3.43487	0.0162936
OG0000274	2.21369	0.341938	-0.139119	0.943501	-2.35281	0.34893
OG0000276	1.18334	0.117236	1.91303	0.0635896	0.729684	0.479816
OG0000277	4.89388	0.00681288	-2.83092	0.00992796	-7.7248	0.000623384
OG0000278	-3.22957	2.73589e-05	-2.3656	0.000240425	0.863974	0.00646221
OG0000279	0.298264	0.558042	-0.206251	0.714367	-0.504515	0.371175
OG0000280	-9.52387	4.98427e-05	-6.76895	0.000404265	2.75492	0.000160593
OG0000281	4.83609	0.0476151	4.96098	0.0989262	0.124888	0.974027
OG0000282	9.70901	9.76047e-05	7.54736	0.000859545	-2.16165	0.232638
OG0000283	-2.1276	0.233593	-3.14649	0.0994597	-1.01888	0.507996
OG0000284	8.34304	0.000164567	-0.22699	0.49087	-8.57003	0.000234243
OG0000285	2.60545	0.0798971	-6.41023	0.000519626	-9.01568	0.000164481
OG0000286	-2.31198	0.269347	-7.74494	0.00242722	-5.43297	0.00621764
OG0000287	0.723453	0.573486	3.8811	0.13205	3.15765	0.225386
OG0000288	0.461585	0.752737	-4.38468	0.00444545	-4.84627	0.00332039
OG0000289	2.05068	4.86285e-05	3.66282	5.61114e-05	1.61215	0.0017645
OG0000290	-1.5172	0.118955	0.0101061	0.994201	1.52731	0.203694
OG0000291	-5.23755	0.008631	-3.53528	0.0775541	1.70228	0.159903
OG0000292	-0.191251	0.588288	1.85313	0.0160631	2.04438	0.0103154
OG0000293	-4.18818	0.0494363	-1.85316	0.457974	2.33502	0.265446
OG0000294	-4.6072	0.0142415	-5.13857	0.0110809	-0.531369	0.507196
OG0000295	-1.81601	0.0477194	-3.49094	0.00333023	-1.67493	0.0214229
OG0000300	-3.37283	0.00339507	-1.2395	0.271722	2.13333	0.03435
OG0000301	-2.32695	0.330021	-7.11995	0.00755448	-4.79301	0.0208631
OG0000302	0.17109	0.878697	-3.43531	0.00725037	-3.6064	0.00609342
OG0000303	-1.43412	0.0834713	-0.334763	0.739179	1.09936	0.229161
OG0000305	1.79269	0.101757	-0.919881	0.377766	-2.71257	0.0347096
OG0000306	5.57447	0.00349943	5.80851	0.00866891	0.234035	0.916079
OG0000307	-6.76497	9.50401e-05	-2.76255	0.0271354	4.00241	0.00229896
OG0000308	3.90224	0.000442056	7.28508	0.000666422	3.38284	0.0331267
OG0000309	-6.89361	7.40061e-05	-7.69998	8.6899e-05	-0.806371	0.125015
OG0000310	-5.15846	0.0126967	-1.62684	0.465522	3.53163	0.0809632
OG0000311	6.94261	0.00025784	6.72158	0.000913426	-0.221036	0.887684
OG0000312	0.416384	0.435255	-0.464278	0.401763	-0.880662	0.141253
OG0000313	-4.63211	0.0127027	-4.06676	0.0397201	0.565348	0.66129
OG0000314	2.10381	0.0215072	-2.16095	0.00459762	-4.26476	0.000652645
OG0000317	5.69291	0.0253324	-3.70777	0.00458139	-9.40067	0.00277693
OG0000319	-1.32637	0.0584152	0.0268878	0.976381	1.35326	0.0966671
OG0000320	-3.9062	0.121928	-7.87266	0.00627993	-3.96646	0.0500082
OG0000321	2.2385	0.297996	-0.532578	0.759012	-2.77108	0.23565
OG0000322	1.78317	0.00562822	1.1384	0.0529104	-0.644776	0.309707
OG0000323	5.9144	0.000622048	-0.0981186	0.911508	-6.01252	0.00105382
OG0000324	4.77651	0.0263834	-1.73823	0.160334	-6.51474	0.00652995
OG0000325	-8.86483	0.00111359	-8.77667	0.00162001	0.0881557	0.870584
OG0000326	2.36815	0.333951	-1.22851	0.459402	-3.59666	0.152669
OG0000327	0.0986163	0.866769	-0.0266386	0.969994	-0.125255	0.857324
OG0000328	6.26513	0.00315053	-3.31889	0.00114166	-9.58403	0.000443344
OG0000329	-0.672283	0.323645	-3.48675	0.000642569	-2.81447	0.00120827
OG0000330	-6.20662	0.000141446	-0.330714	0.797083	5.8759	0.000591425
OG0000331	-5.18438	0.000580478	-6.32805	0.000334393	-1.14367	0.122419
OG0000332	-1.20982	0.0115238	7.34111	0.00251898	8.55093	0.00126717
OG0000333	10.3462	0.000622485	6.6762	0.00687767	-3.66999	0.173717
OG0000334	0.902095	0.654901	-6.38782	0.00378956	-7.28992	0.00250576
OG0000335	-8.32068	0.000121875	-8.70039	0.000169993	-0.37971	0.313417
OG0000336	-0.521408	0.800643	-4.06038	0.056797	-3.53897	0.0815535
OG0000337	2.84245	3.41502e-05	2.91237	0.000117091	0.0699213	0.862999
OG0000338	0.508921	0.586867	-0.0909598	0.933665	-0.599881	0.569201
OG0000339	4.86041	0.00326132	-1.71678	0.029076	-6.57719	0.000815707
OG0000340	-4.45765	0.000833041	-5.19511	0.000565929	-0.737466	0.0604181
OG0000342	1.82977	0.0211572	3.95644	0.00582015	2.12667	0.090588
OG0000343	8.3478	0.000203657	3.20549	0.0153655	-5.14232	0.00885761
OG0000344	-6.3282	0.000116439	0.0321191	0.978589	6.36032	0.000361473
OG0000346	-3.45855	2.58566e-05	-3.3362	7.15029e-05	0.122351	0.590968
OG0000347	-2.95982	5.01931e-05	-2.68973	0.000164948	0.27009	0.245634
OG0000348	2.28657	0.000124394	5.61938	0.000336581	3.33281	0.00443441
OG0000349	-3.25016	0.00525356	-6.47223	0.000178901	-3.22206	0.000525461
OG0000351	-4.10916	0.0519838	-2.69568	0.238309	1.41348	0.332867
OG0000352	-7.83026	2.33058e-05	-3.14956	0.0025491	4.68071	3.86637e-05
OG0000353	5.20641	0.000220742	9.26221	0.000566788	4.0558	0.0358719
OG0000354	-0.817248	0.766279	-3.99927	0.123813	-3.18202	0.188678
OG0000355	-3.61529	0.000577225	0.904138	0.387041	4.51943	0.00129642
OG0000356	1.31207	0.201975	1.47565	0.237017	0.163575	0.909698
OG0000357	5.09102	0.00242107	2.64415	0.0262736	-2.44687	0.122675
OG0000358	-2.15042	0.00194706	-1.05957	0.0837277	1.09085	0.0361764
OG0000359	-5.38638	0.00545794	-4.63126	0.0162828	0.755121	0.342055
OG0000360	4.50434	0.0282809	-2.26873	0.0691435	-6.77307	0.0041121
OG0000361	-1.67176	0.411079	-6.35937	0.00799102	-4.68761	0.0259372
OG0000362	8.97847	5.0271e-05	-0.904566	0.0339133	-9.88304	5.84565e-05
OG0000363	-0.838158	0.221235	-1.9246	0.0176939	-1.08645	0.07989
OG0000364	5.41523	0.119689	1.46365	0.678719	-3.95158	0.329178
OG0000366	3.52702	0.00448933	3.74123	0.00938987	0.214204	0.877805
OG0000367	1.50159	0.220133	0.833945	0.541616	-0.667649	0.649351
OG0000368	0.45013	0.548527	2.27891	0.0380198	1.82878	0.0844617
OG0000369	-1.81253	0.0923957	1.50828	0.277406	3.32081	0.0289247
OG0000370	-1.89205	0.0149572	-1.20639	0.130069	0.685656	0.256115
OG0000371	1.93331	0.167107	-0.900364	0.512062	-2.83368	0.076425
OG0000372	-3.32794	0.00120323	-2.1259	0.0254182	1.20204	0.0732309
OG0000373	-0.379282	0.475152	3.53397	0.00579954	3.91325	0.00340441
OG0000375	3.26894	0.0020827	2.22403	0.021724	-1.04491	0.285098
OG0000376	-1.50658	0.0763372	-0.427827	0.669437	1.07875	0.243605
OG0000377	-0.63059	0.807378	-5.25717	0.0398951	-4.62658	0.0564331
OG0000378	-10.3855	0.000331892	4.73033	0.142409	15.1158	0.000829365
OG0000380	-1.82029	0.148877	2.02016	0.243155	3.84045	0.0377116
OG0000381	5.45307	0.00168569	-5.24532	0.000264527	-10.6984	5.79914e-05
OG0000382	-2.61306	0.000736601	-1.02117	0.107304	1.59188	0.0075935
OG0000383	-3.71278	0.000174951	-4.88282	9.46007e-05	-1.17004	0.0015735
OG0000384	5.30865	0.000453628	-0.795286	0.305934	-6.10393	0.000400457
OG0000385	-4.06267	0.00106574	1.0177	0.422458	5.08037	0.00182433
OG0000386	1.22516	0.256478	1.67512	0.197576	0.449958	0.7452
OG0000388	1.54616	0.0115084	-1.0028	0.0267693	-2.54895	0.00138356
OG0000389	-3.7567	0.00283154	-3.11925	0.0143837	0.637455	0.45427
OG0000390	1.23745	0.0187727	0.594968	0.220468	-0.642483	0.246917
OG0000391	-2.24097	0.0185874	-7.51709	6.65198e-05	-5.27612	5.2367e-05
OG0000392	7.8358	0.0056664	0.749089	0.352129	-7.08671	0.0125829
OG0000393	-0.968362	0.760215	-2.76549	0.396153	-1.79713	0.571785
OG0000394	0.955631	0.335058	1.63066	0.254289	0.67503	0.66116
OG0000395	3.13468	0.0177216	-6.31938	0.000112775	-9.45406	6.66608e-05
OG0000396	-4.28861	0.0940737	-4.64371	0.101052	-0.355101	0.889166
OG0000397	-2.42001	0.337567	-9.45613	0.00182937	-7.03612	0.0049124
OG0000398	0.930638	0.184686	1.1391	0.196189	0.208465	0.833369
OG0000399	1.92963	0.40935	-1.38199	0.453476	-3.31162	0.155426
OG0000400	-5.43194	0.00721217	-7.05564	0.00253536	-1.6237	0.0241217
OG0000401	-2.21747	0.234664	-5.91276	0.00632762	-3.69529	0.0124762
OG0000402	2.82276	0.0020491	8.1013	0.00298487	5.27854	0.0238553
OG0000403	0.685028	0.453475	0.072383	0.947423	-0.612645	0.564397
OG0000404	-0.797464	0.540632	-5.87631	0.00154783	-5.07884	0.00330947
OG0000405	-0.247513	0.421976	1.76537	0.00704769	2.01288	0.00382764
OG0000406	-1.29512	0.106391	2.28121	0.118303	3.57633	0.0216711
OG0000407	-3.54756	0.0570299	-2.1883	0.288699	1.35927	0.343705
OG0000408	-0.20602	0.833279	1.72848	0.247055	1.9345	0.195119
OG0000409	-7.56821	0.00150317	-3.41635	0.0845026	4.15187	0.00340002
OG0000410	9.90235	0.0116479	1.72164	0.0636261	-8.18071	0.033158
OG0000411	-0.462988	0.132979	1.33417	0.0151543	1.79716	0.00374202
OG0000412	10.3126	4.65704e-05	-1.27612	0.0030742	-11.5887	5.2367e-05
OG0000413	-3.40748	0.123007	-1.0407	0.700647	2.36678	0.320671
OG0000414	1.39094	0.112575	-0.687193	0.31737	-2.07813	0.0346932
OG0000415	-6.50892	0.0108696	5.87198	0.192969	12.3809	0.0126097
OG0000416	-0.0408393	0.967924	1.71417	0.171315	1.75501	0.165412
OG0000417	3.19838	0.00087677	2.51145	0.0054447	-0.686923	0.420369
OG0000418	1.98032	0.0012439	1.66793	0.00636662	-0.312389	0.552342
OG0000419	1.1529	0.00309776	3.6427	0.000517604	2.4898	0.00365723
OG0000421	-2.14675	0.00483712	-5.49142	7.68355e-05	-3.34467	5.89084e-05
OG0000422	-0.868817	0.115363	-3.332	0.000347489	-2.46318	0.000446887
OG0000423	8.66871	4.92159e-05	7.39864	0.000345482	-1.27007	0.356545
OG0000424	-1.00426	0.630547	5.33489	0.124289	6.33915	0.0690951
OG0000425	-4.95869	0.0491721	-4.38422	0.102137	0.574465	0.712196
OG0000426	1.82615	0.000302844	7.05616	0.000147281	5.23001	0.000593294
OG0000428	5.20504	0.00984765	-0.257091	0.831019	-5.46213	0.0114468
OG0000429	1.45113	0.171009	1.05235	0.37745	-0.398778	0.76789
OG0000431	1.45949	0.00615413	0.781997	0.0921704	-0.677493	0.189015
OG0000433	-3.66241	0.114428	-7.45598	0.00580224	-3.79357	0.0498066
OG0000434	4.16825	0.070174	-2.13366	0.262278	-6.30192	0.0167187
OG0000435	2.96493	0.0906474	-1.29538	0.272603	-4.26031	0.0257725
OG0000436	-3.37099	0.109364	0.607037	0.847895	3.97803	0.142517
OG0000437	-7.81821	0.00325469	-6.10943	0.0160664	1.70878	0.0926427
OG0000438	9.04687	0.000922156	2.46357	0.0216317	-6.5833	0.00845106
OG0000439	-3.08713	0.280082	-3.26306	0.309173	-0.175934	0.955872
OG0000440	7.12175	0.000934283	-4.5535	0.000246763	-11.6753	9.69207e-05
OG0000441	-5.52618	0.00841635	-0.610206	0.809888	4.91597	0.0307389
OG0000442	2.36336	0.0350443	-3.05925	0.00112274	-5.42261	0.000860524
OG0000444	-0.88802	0.240882	-0.0650675	0.949863	0.822953	0.346137
OG0000445	-1.83368	3.78009e-05	-1.37824	0.000340886	0.455433	0.0304659
OG0000446	-3.72748	3.0152e-05	-2.00882	0.0011597	1.71866	0.000308344
OG0000447	-4.57156	0.00550955	-0.120132	0.948972	4.45142	0.0155956
OG0000448	2.28318	0.00982118	-1.69423	0.00575707	-3.97741	0.000730219
OG0000449	2.3489	0.00810103	2.71728	0.0113982	0.368383	0.707409
OG0000450	-2.2313	0.091583	-1.38156	0.362845	0.849737	0.477101
OG0000453	5.31097	0.00113967	2.8806	0.024325	-2.43037	0.0932663
OG0000454	-5.74224	0.00309707	-4.45298	0.0219549	1.28926	0.263122
OG0000456	2.64801	0.246964	2.07893	0.423202	-0.569086	0.849486
OG0000457	-1.16628	0.0714552	0.218313	0.802535	1.38459	0.0855357
OG0000458	-5.25987	0.0066181	-3.99343	0.0454176	1.26644	0.347835
OG0000459	-5.81917	0.000189079	-2.42648	0.0398713	3.39269	0.00467335
OG0000460	4.74827	0.0211981	-1.62945	0.171626	-6.37772	0.00584415
OG0000461	-1.0233	0.0841895	-4.56149	0.000101583	-3.53819	8.56436e-05
OG0000462	-6.45354	0.00727175	-7.3577	0.00490801	-0.90416	0.245465
OG0000463	0.88329	0.162549	3.53068	0.0181916	2.64739	0.0604581
OG0000465	-2.91604	0.136501	1.21281	0.694591	4.12885	0.128602
OG0000466	4.21963	0.0642598	-3.50318	0.0506167	-7.72281	0.00410241
OG0000468	-1.97342	0.247945	2.4749	0.326319	4.44832	0.078934
OG0000469	0.50321	0.861487	-4.47094	0.0615605	-4.97415	0.0471932
OG0000470	-3.43803	0.0288062	0.682016	0.72514	4.12005	0.034797
OG0000471	-1.61219	0.206011	-3.55362	0.0177265	-1.94143	0.106453
OG0000473	4.50137	0.153126	2.8191	0.39778	-1.68228	0.670488
OG0000474	3.8133	0.00383294	3.3941	0.0143901	-0.419203	0.753623
OG0000476	-5.78032	0.00331115	-4.8375	0.0132358	0.942821	0.293795
OG0000477	-2.91974	0.00359718	-3.13653	0.00416642	-0.216795	0.724618
OG0000479	2.05873	0.00029938	9.69073	6.05354e-05	7.632	0.000132542
OG0000480	0.570804	0.735706	-4.95855	0.0091809	-5.52935	0.00610367
OG0000481	5.94486	0.0010279	2.92499	0.0379894	-3.01987	0.0599128
OG0000483	0.712127	0.530676	-1.03882	0.327107	-1.75095	0.140638
OG0000484	6.01944	0.00293542	-0.313379	0.733298	-6.33282	0.00340918
OG0000485	-4.59706	0.113008	0.0321191	0.993319	4.62917	0.174797
OG0000486	-6.28572	0.000225845	-8.29009	9.06829e-05	-2.00438	0.00709831
OG0000487	5.50116	0.01066	1.25006	0.409767	-4.2511	0.0613616
OG0000488	-1.217	0.496405	0.927947	0.711862	2.14494	0.355954
OG0000489	-4.67639	0.0194936	-2.70029	0.211198	1.9761	0.19531
OG0000490	2.59237	0.00883285	1.37779	0.0767197	-1.21457	0.217927
OG0000492	-9.7345	0.00282596	-9.96008	0.0032679	-0.225583	0.685244
OG0000494	1.32059	0.484719	-3.34171	0.0771969	-4.6623	0.0298836
OG0000495	2.16931	0.000366003	2.27838	0.00113046	0.109068	0.833841
OG0000496	1.98898	0.0527119	0.623448	0.542666	-1.36553	0.223241
OG0000497	10.4138	2.78316e-05	2.36077	0.00164478	-8.05302	0.000175397
OG0000498	-1.18262	0.00860893	4.07832	0.00417769	5.26095	0.00122694
OG0000499	-0.99987	0.793487	-4.38287	0.176531	-3.383	0.233257
OG0000500	-1.77033	0.064141	-3.76111	0.00244982	-1.99079	0.0087061
OG0000501	0.155482	0.761038	-2.81632	0.000491812	-2.9718	0.000375435
OG0000502	-1.72785	0.567545	-5.77065	0.0436269	-4.0428	0.0772609
OG0000503	3.9237	0.0243217	0.3022	0.813803	-3.6215	0.0524463
OG0000504	-2.46566	0.00152573	2.16493	0.0825036	4.6306	0.00340918
OG0000505	1.3982	0.521608	0.223054	0.928364	-1.17514	0.6487
OG0000506	2.32426	0.0513521	-3.66439	0.00605017	-5.98865	0.000775976
OG0000507	0.809415	0.714554	-1.07297	0.631671	-1.88239	0.413816
OG0000508	-2.27828	0.274273	-4.29498	0.0486901	-2.0167	0.165412
OG0000509	1.05228	0.0984045	-4.20024	7.85712e-05	-5.25252	6.48343e-05
OG0000511	0.966403	0.401855	2.59819	0.0996942	1.63179	0.297332
OG0000512	7.87577	0.00273543	0.701723	0.596188	-7.17404	0.00801848
OG0000513	-0.364151	0.59	2.26578	0.0749174	2.62993	0.0425139
OG0000515	-1.53345	0.00750463	2.49427	0.0233564	4.02772	0.0023227
OG0000517	-1.3706	0.520035	-6.77849	0.00467138	-5.40789	0.00838586
OG0000518	2.38417	0.0112531	5.3336	0.0193551	2.94943	0.152764
OG0000519	-5.78122	0.192101	-4.91812	0.333434	0.8631	0.846787
OG0000520	-2.05791	0.0218877	0.851502	0.485063	2.90941	0.0216711
OG0000521	-1.34416	0.00236605	0.998503	0.060116	2.34267	0.00127077
OG0000522	0.0504284	0.986118	0.41003	0.9028	0.359602	0.915178
OG0000523	4.05918	0.0143909	4.82212	0.0242764	0.762945	0.735561
OG0000524	-1.28681	0.0404574	0.593138	0.470069	1.87995	0.0329306
OG0000525	1.90529	0.00409359	0.390564	0.378866	-1.51473	0.0226914
OG0000526	-4.4767	0.000683987	-5.45709	0.000375778	-0.980386	0.0423931
OG0000527	-0.434098	0.802516	-4.04373	0.0230339	-3.60963	0.0328724
OG0000528	-0.129517	0.857321	-4.71741	0.000150808	-4.58789	0.000109848
OG0000529	2.13323	0.463666	0.780032	0.815082	-1.3532	0.701678
OG0000530	0.167712	0.734122	-1.43067	0.012232	-1.59839	0.00733013
OG0000531	2.67133	0.248263	-2.96216	0.17732	-5.6335	0.0319775
OG0000532	0.831313	0.81109	-3.55371	0.183839	-4.38502	0.13733
OG0000533	6.65656	2.4747e-05	0.749791	0.0110592	-5.90677	6.71328e-05
OG0000534	-1.11581	0.0200321	8.4142	0.000450923	9.53001	0.000246333
OG0000535	7.01199	0.000401675	3.13617	0.015583	-3.87582	0.0245964
OG0000536	-0.0563211	0.984952	-0.756563	0.810729	-0.700242	0.827249
OG0000537	5.07195	0.00010688	2.85232	0.000788056	-2.21964	0.0178606
OG0000538	0.228073	0.929715	-1.81991	0.468921	-2.04799	0.421057
OG0000539	5.95795	0.000232664	0.247268	0.758265	-5.71068	0.000623487
OG0000540	1.46028	0.232406	4.14285	0.0350118	2.68257	0.159712
OG0000541	-1.01754	0.75051	0.761963	0.855742	1.77951	0.650221
OG0000542	-1.12368	0.0992625	-1.16302	0.123019	-0.0393469	0.953004
OG0000543	-2.76251	0.387701	-7.70116	0.0179318	-4.93866	0.0397499
OG0000544	-1.00082	0.118157	0.0457524	0.957437	1.04658	0.165584
OG0000545	-2.83336	0.0855723	-5.44495	0.00520629	-2.61159	0.02453
OG0000546	-5.28206	0.00933703	-5.91989	0.00702574	-0.63783	0.534621
OG0000547	8.44485	4.3144e-05	-0.476093	0.249482	-8.92095	6.09831e-05
OG0000548	2.71008	0.0888004	4.55513	0.0559434	1.84505	0.458746
OG0000549	8.83845	5.12986e-05	0.377321	0.424596	-8.46113	0.000114516
OG0000550	5.16649	0.0103721	5.52219	0.0251809	0.355703	0.899335
OG0000551	5.66755	0.00504358	0.468495	0.540803	-5.19906	0.0112794
OG0000552	0.203935	0.921928	-1.29529	0.537477	-1.49923	0.479728
OG0000553	-3.54009	0.0517447	-2.96074	0.137594	0.57935	0.693349
OG0000554	2.82105	0.00494514	1.22138	0.129562	-1.59967	0.109051
OG0000555	8.00952	0.000570277	1.57472	0.0125818	-6.4348	0.00270231
OG0000556	3.41225	0.091699	1.02301	0.541514	-2.38925	0.305149
OG0000557	-0.401713	0.196079	-0.116292	0.757844	0.285421	0.415719
OG0000558	1.03682	0.242032	-1.76272	0.0299453	-2.79954	0.00805717
OG0000559	2.98918	0.098353	-0.313007	0.842042	-3.30218	0.0957525
OG0000560	1.41021	0.562282	-3.10367	0.126533	-4.51387	0.0555159
OG0000561	4.48847	0.0833177	-0.89177	0.577152	-5.38024	0.050497
OG0000562	-1.00919	0.116244	-0.745709	0.307551	0.263482	0.684846
OG0000563	-0.899578	0.690255	-3.7784	0.10912	-2.87882	0.19342
OG0000564	-4.23883	0.032157	-3.70748	0.0710747	0.531347	0.61166
OG0000565	5.15111	0.00419487	3.20321	0.0432807	-1.9479	0.291596
OG0000566	-4.25339	0.0600597	0.757732	0.828066	5.01113	0.092008
OG0000567	-1.53775	0.071046	3.88958	0.0389292	5.42733	0.00825859
OG0000568	1.37624	0.0553894	-2.91856	0.000438318	-4.29479	0.000265232
OG0000569	-7.60839	3.94457e-05	-4.09239	0.00308017	3.51599	0.00176962
OG0000570	7.03453	0.000608781	-0.150684	0.87649	-7.18522	0.00096151
OG0000571	-4.46663	0.0957668	-5.57189	0.0587227	-1.10526	0.641111
OG0000572	-2.89851	0.0012446	-2.2265	0.00827518	0.672007	0.131376
OG0000573	6.71456	0.000810415	5.61641	0.00426151	-1.09815	0.5575
OG0000574	0.521465	0.559707	1.44986	0.27023	0.928393	0.495789
OG0000575	6.45026	0.000829851	3.05367	0.00327971	-3.39659	0.0331267
OG0000576	7.51992	4.79399e-05	1.10607	0.0926915	-6.41385	0.000257626
OG0000577	11.1748	1.70644e-05	1.284	0.00129574	-9.89075	3.98169e-05
OG0000578	2.39876	9.07592e-05	11.3282	7.85712e-05	8.92942	0.000192848
OG0000579	0.457672	0.0301151	0.350024	0.119782	-0.107648	0.630682
OG0000580	4.25541	0.0663647	2.87273	0.235287	-1.38268	0.624117
OG0000581	-1.34079	0.115413	4.11126	0.0334889	5.45205	0.00894581
OG0000582	0.393395	0.422444	-0.561553	0.262397	-0.954948	0.0840981
OG0000583	2.1664	0.0212759	-0.705064	0.377554	-2.87147	0.0100391
OG0000584	-0.0724253	0.923888	0.509456	0.566046	0.581881	0.509042
OG0000586	-6.36835	0.00222039	-10.0087	0.00022911	-3.64036	0.00226429
OG0000587	-0.509409	0.791695	-5.22919	0.0104991	-4.71978	0.0144229
OG0000588	3.24394	0.173565	-5.2081	0.00700283	-8.45204	0.0031983
OG0000589	-10.1271	0.000188438	-8.22331	0.000967784	1.90375	0.0172394
OG0000591	1.28964	0.00731125	0.568645	0.161869	-0.720992	0.127659
OG0000592	-4.75784	0.00277627	-3.96201	0.0141105	0.795836	0.44197
OG0000593	9.18228	5.02215e-05	0.0973222	0.758265	-9.08496	8.67764e-05
OG0000594	-4.13732	0.00284613	3.23986	0.103003	7.37717	0.00255062
OG0000595	3.99071	0.0199639	0.991993	0.463648	-2.99872	0.106662
OG0000596	0.787674	0.20991	1.88752	0.0546084	1.09984	0.248875
OG0000597	0.463885	0.341286	0.059503	0.919185	-0.404382	0.476446
OG0000598	-6.97476	0.000245813	-9.77808	7.85712e-05	-2.80332	0.000980886
OG0000599	1.12322	0.00837983	2.85236	0.00228353	1.72914	0.0251553
OG0000600	3.36527	0.00480545	3.71188	0.00992726	0.346617	0.808022
OG0000601	-3.14453	0.0413048	0.115926	0.955718	3.26045	0.0743624
OG0000604	1.07136	0.114707	-0.324431	0.631317	-1.39579	0.0714973
OG0000605	-4.75624	0.117251	-7.4759	0.0212556	-2.71966	0.219458
OG0000606	-5.72134	0.00072587	-4.85427	0.00318106	0.867071	0.212144
OG0000607	-0.017788	0.988494	5.67824	0.0398765	5.69602	0.0402269
OG0000608	0.253155	0.837585	-6.08445	0.000792977	-6.3376	0.00069664
OG0000610	-1.86232	0.17736	-10.5457	7.68355e-05	-8.68337	0.000103323
OG0000611	-11.6759	1.70644e-05	-8.51182	6.17746e-05	3.16406	5.79914e-05
OG0000612	-0.750035	0.231282	-0.276906	0.722267	0.473129	0.492606
OG0000613	-1.27704	0.524507	1.59932	0.557931	2.87636	0.276337
OG0000614	2.59201	0.00639879	1.17877	0.144867	-1.41324	0.134126
OG0000615	-1.71744	0.0703681	-2.17593	0.0463499	-0.458483	0.621662
OG0000616	1.36777	0.0544474	1.99435	0.0508032	0.626577	0.535477
OG0000617	2.48639	0.0155348	-0.347695	0.690176	-2.83408	0.0148308
OG0000618	-5.56461	2.88846e-05	1.16412	0.176607	6.72874	7.86029e-05
OG0000619	-6.62877	7.92605e-05	-10.249	3.75481e-05	-3.62019	9.33529e-05
OG0000620	-1.7938	0.40864	-0.664322	0.819237	1.12948	0.638134
OG0000621	3.67677	0.187518	0.40462	0.890556	-3.27215	0.297348
OG0000622	2.1515	0.0102899	1.68393	0.0511231	-0.467578	0.598267
OG0000623	-1.86725	0.000767329	-0.770417	0.0834173	1.09683	0.0130568
OG0000624	1.46077	0.545984	-4.92124	0.0239708	-6.38201	0.0122251
OG0000625	0.392292	0.513013	-1.88559	0.00686634	-2.27788	0.00341855
OG0000626	1.24757	0.011125	1.3773	0.0206811	0.129736	0.823486
OG0000627	4.80011	0.0485845	5.69374	0.0737743	0.893624	0.813899
OG0000628	0.522927	0.810967	4.57402	0.13015	4.0511	0.183039
OG0000629	0.0963841	0.804868	4.9025	0.00241208	4.80612	0.00282007
OG0000631	-4.05483	0.00211724	-1.52577	0.192858	2.52906	0.0114573
OG0000632	0.66062	0.626957	-6.42722	0.000711151	-7.08783	0.00046775
OG0000633	-1.25486	0.627635	-2.11657	0.454336	-0.861715	0.765998
OG0000636	10.2904	0.00236605	8.41967	0.00907846	-1.87074	0.59688
OG0000638	4.92376	0.000865366	5.06441	0.00274556	0.140642	0.928574
OG0000639	0.859506	0.473959	4.93576	0.0414881	4.07626	0.0872371
OG0000640	-2.04911	0.0417018	4.27721	0.11039	6.32632	0.0286717
OG0000642	-2.30205	0.0339257	-3.01065	0.0169429	-0.708608	0.455017
OG0000643	8.41606	5.13774e-05	6.02948	0.000576074	-2.38659	0.0828379
OG0000644	0.977597	0.462143	0.715773	0.645807	-0.261825	0.883158
OG0000645	5.29293	0.0798732	-1.30853	0.586532	-6.60145	0.0437914
OG0000646	0.0632099	0.904484	0.521539	0.424245	0.458329	0.483578
OG0000647	0.645815	0.641894	-6.33395	0.000565692	-6.97976	0.000431033
OG0000648	-0.501212	0.570017	0.186632	0.875879	0.687845	0.521596
OG0000649	0.314571	0.131016	3.95543	0.000206399	3.64086	0.000293524
OG0000650	5.91191	0.00202212	-1.59422	0.0556408	-7.50613	0.000716374
OG0000651	11.654	4.50388e-05	4.70187	0.000617628	-6.95211	0.00156554
OG0000652	-3.5109	0.00465047	-8.99798	5.65951e-05	-5.48709	8.94512e-05
OG0000653	-0.0944268	0.910901	-0.796284	0.351501	-0.701857	0.395135
OG0000654	1.25911	0.000440609	1.2662	0.00136695	0.0070837	0.981287
OG0000655	-7.25416	0.00133109	-6.68797	0.00291244	0.566186	0.364929
OG0000656	6.3717	0.000247301	0.0761946	0.921341	-6.2955	0.000496599
OG0000657	-1.56873	0.463845	-5.65304	0.0156135	-4.08431	0.0385835
OG0000658	-1.77671	0.0927392	4.34857	0.0827432	6.12529	0.0215067
OG0000659	7.84021	0.00501655	0.495615	0.521275	-7.34459	0.00954151
OG0000660	-2.68826	0.196255	-8.07108	0.00196303	-5.38283	0.00812636
OG0000661	0.422233	0.25315	0.410208	0.350446	-0.0120249	0.980838
OG0000663	-0.89666	0.320041	-2.12247	0.0366109	-1.22581	0.14461
OG0000664	1.21052	0.604997	-2.64197	0.15156	-3.85249	0.0812189
OG0000665	0.965003	0.255267	-0.523777	0.553526	-1.48878	0.124065
OG0000666	-1.66943	0.395261	-7.5433	0.00206351	-5.87388	0.00583117
OG0000667	1.09592	0.63712	-3.843	0.0663422	-4.93892	0.034797
OG0000668	-4.54991	4.44679e-05	-3.7873	0.000194765	0.762603	0.0144974
OG0000669	-1.72385	0.0579191	4.14617	0.0232125	5.87002	0.00393828
OG0000670	-2.50553	0.00128347	2.79604	0.0201247	5.30157	0.000751443
OG0000671	-5.84633	0.0021119	-8.59689	0.000295533	-2.75056	0.0101032
OG0000672	-2.85064	0.000265376	-1.94015	0.00387632	0.910485	0.0194425
OG0000673	-4.95113	4.7166e-05	0.599328	0.459495	5.55046	0.000134199
OG0000674	-2.12598	0.138485	-6.75471	0.000717421	-4.62873	0.00197938
OG0000675	3.52436	0.000144009	1.02178	0.0139986	-2.50258	0.00170656
OG0000677	3.56905	0.0545773	0.185872	0.907867	-3.38318	0.0949893
OG0000678	2.2902	0.091203	-0.639802	0.527691	-2.93	0.0471682
OG0000679	4.2275	0.0003245	2.15818	0.00281969	-2.06932	0.0249223
OG0000680	-0.027974	0.936818	-0.97545	0.0194417	-0.947477	0.0205332
OG0000681	-3.45844	0.00107856	-2.05372	0.0280975	1.40473	0.02866
OG0000682	-6.80635	0.0137923	-2.98565	0.333883	3.8207	0.112672
OG0000683	6.77984	0.00791367	1.54977	0.21105	-5.23007	0.0413231
OG0000684	-7.11024	0.000856244	-1.90224	0.315639	5.208	0.00902314
OG0000685	6.43809	0.00742341	-1.36556	0.106736	-7.80365	0.00376954
OG0000686	-3.7344	0.00840278	-1.05623	0.460126	2.67817	0.0532274
OG0000687	-0.828575	0.549713	-7.06254	0.000589481	-6.23396	0.00113466
OG0000688	-1.26064	0.0209528	-1.35187	0.0258873	-0.0912378	0.84971
OG0000689	6.24759	0.00517363	-0.497115	0.552244	-6.7447	0.00489518
OG0000690	-5.39543	0.00226203	-5.47742	0.00309793	-0.0819912	0.910286
OG0000691	4.75047	0.000866685	-2.1653	0.0151136	-6.91576	0.000173363
OG0000692	-1.45041	0.523743	1.22333	0.694642	2.67374	0.355135
OG0000693	-1.10171	0.199972	-2.80817	0.00775821	-1.70646	0.0377287
OG0000694	3.02899	0.0775073	1.9472	0.281223	-1.08179	0.594371
OG0000695	9.2407	3.48596e-05	1.61272	0.0119685	-7.62798	0.000172456
OG0000696	-2.81052	0.0564435	0.318999	0.873418	3.12952	0.0803581
OG0000697	-10.2276	0.000306668	-6.98213	0.00331602	3.24551	0.00111633
OG0000698	1.66611	0.0313751	3.15216	0.0215036	1.48604	0.234476
OG0000699	-2.42874	0.00271853	-0.398086	0.618386	2.03065	0.0115235
OG0000700	0.455694	0.852561	-2.3529	0.329602	-2.8086	0.258587
OG0000701	1.86594	0.0428495	1.67851	0.108716	-0.187426	0.879414
OG0000702	-0.792103	0.107319	1.67162	0.0571495	2.46372	0.0108101
OG0000703	1.93621	0.020563	-0.797736	0.14933	-2.73395	0.00546437
OG0000704	-2.62362	0.0599977	-2.39847	0.118336	0.225145	0.850883
OG0000705	0.225896	0.688894	2.59847	0.0312768	2.37258	0.0456133
OG0000706	-0.77372	0.0220582	2.25028	0.00516658	3.024	0.00120359
OG0000707	4.12653	0.0541702	9.81196	0.0222148	5.68544	0.177705
OG0000708	-1.33755	0.00320881	-4.47663	3.75481e-05	-3.13908	3.86637e-05
OG0000709	-1.28132	0.0659868	-1.43191	0.0634145	-0.150591	0.802104
OG0000710	-7.60229	0.00499313	-1.31149	0.667591	6.2908	0.0203142
OG0000711	-6.8229	0.000803224	-5.86469	0.00340897	0.95821	0.263169
OG0000712	0.738118	0.752868	-1.37693	0.566312	-2.11505	0.393183
OG0000713	-5.80601	0.000111359	0.129793	0.914364	5.9358	0.000375753
OG0000714	-0.336162	0.807093	3.12282	0.145187	3.45898	0.107866
OG0000715	1.95852	0.0697223	-0.979535	0.230687	-2.93806	0.0168683
OG0000716	-0.123077	0.829932	7.7096	0.0131176	7.83268	0.0129884
OG0000717	4.59856	0.000907888	5.695	0.00155754	1.09645	0.42477
OG0000718	-1.93554	0.357444	-7.83086	0.0021295	-5.89532	0.00397525
OG0000719	-1.54646	0.519371	-2.96618	0.214791	-1.41973	0.407647
OG0000720	6.86613	0.0207711	4.65871	0.0973628	-2.20742	0.538195
OG0000722	0.34528	0.869222	-6.73438	0.00267599	-7.07966	0.00234958
OG0000723	5.43681	0.00107626	1.58126	0.0347214	-3.85556	0.0113764
OG0000724	-0.0753212	0.983988	-1.95763	0.588181	-1.8823	0.60347
OG0000725	6.79188	0.000437506	1.62066	0.134445	-5.17122	0.00489191
OG0000726	6.02012	0.000262569	2.1934	0.0350678	-3.82672	0.00752858
OG0000727	0.68343	0.00378599	1.55827	0.000328337	0.874842	0.00541079
OG0000728	-2.50921	0.00669407	-1.86358	0.0488299	0.645628	0.37608
OG0000729	1.7881	0.0535975	0.954923	0.272945	-0.833173	0.42411
OG0000730	-0.499986	0.675245	-8.43452	0.000105009	-7.93453	0.000123185
OG0000731	2.4378	0.135098	-2.13396	0.14899	-4.57175	0.0182577
OG0000732	-6.98526	0.00834953	-2.11502	0.468005	4.87024	0.0469974
OG0000733	-4.07794	0.0597206	-3.53297	0.137418	0.544977	0.776604
OG0000734	-0.617698	0.375748	-3.09918	0.00146274	-2.48148	0.00194425
OG0000735	-1.29485	0.222042	-3.40431	0.00823151	-2.10946	0.0182518
OG0000736	0.276847	0.915202	1.17282	0.706231	0.89597	0.779583
OG0000737	0.709273	0.846598	-4.96099	0.0765604	-5.67026	0.0650456
OG0000738	-0.0805812	0.942091	4.14848	0.0318247	4.22907	0.0294554
OG0000739	0.282345	0.449892	4.07063	0.00434043	3.78829	0.00644047
OG0000740	-0.214574	0.347269	1.86963	0.00123957	2.08421	0.000715216
OG0000741	-2.34264	0.248263	-2.84688	0.186588	-0.504234	0.740304
OG0000742	0.776384	0.0040066	4.37814	8.44005e-05	3.60175	0.000172037
OG0000743	-3.32901	0.0866832	-8.2057	0.00121226	-4.87669	0.00318433
OG0000744	3.63113	0.0478062	2.60244	0.173911	-1.02869	0.647018
OG0000745	-0.528503	0.446054	-1.38615	0.0793157	-0.857642	0.22168
OG0000746	2.13996	0.00332812	-0.398609	0.329805	-2.53856	0.00230784
OG0000747	-3.6609	0.0136364	-2.96724	0.0511002	0.693662	0.433207
OG0000748	1.78372	0.0353691	-0.965692	0.171741	-2.74941	0.00709998
OG0000749	-5.89908	0.00341223	-5.40038	0.00904572	0.498694	0.617384
OG0000751	0.728882	0.282327	2.6382	0.0430861	1.90931	0.131879
OG0000752	0.272292	0.705602	1.36569	0.142456	1.0934	0.23824
OG0000753	0.0830305	0.977101	1.94534	0.566624	1.86231	0.587792
OG0000754	-3.48306	0.101971	-0.0556952	0.984935	3.42737	0.180263
OG0000755	-6.14246	0.000529721	-8.53605	0.000163087	-2.39359	0.000596264
OG0000756	-4.79205	0.000614946	-2.05952	0.0861295	2.73253	0.0119423
OG0000757	4.52353	0.0222097	1.15933	0.348823	-3.3642	0.106203
OG0000758	-0.961666	0.00423644	-0.939293	0.00945715	0.0223725	0.935723
OG0000759	11.1552	1.8821e-05	0.789984	0.012109	-10.3652	3.98452e-05
OG0000760	-9.65933	3.95872e-05	-7.89468	0.000206271	1.76465	0.00614648
OG0000761	-2.13949	0.0770826	3.93511	0.0398951	6.07459	0.0051656
OG0000764	-2.41406	0.293808	-3.97304	0.0995302	-1.55898	0.245323
OG0000765	-1.21606	0.0930805	-0.104424	0.916022	1.11164	0.182399
OG0000766	-5.60204	0.000356677	-0.201719	0.883674	5.40032	0.00135256
OG0000769	0.11942	0.739235	1.67715	0.016806	1.55773	0.0234055
OG0000770	0.551036	0.803585	-4.70446	0.0179144	-5.2555	0.0135095
OG0000771	-1.83912	0.0110911	5.56777	0.010122	7.40689	0.0025621
OG0000772	9.10414	0.000610472	0.679137	0.401099	-8.425	0.00160891
OG0000773	-2.02433	0.0143877	-0.991411	0.252891	1.03292	0.174496
OG0000774	4.21719	0.0272621	0.385553	0.763339	-3.83164	0.0588863
OG0000775	3.34135	0.271126	-4.28582	0.0368855	-7.62717	0.0186719
OG0000776	3.71576	0.00114495	3.16886	0.00581701	-0.546904	0.592193
OG0000777	-3.38895	0.155542	-2.55046	0.35024	0.838495	0.735668
OG0000778	1.93713	0.13254	-3.3196	0.0107895	-5.25673	0.00221095
OG0000780	8.36246	2.72009e-05	3.32414	0.00151822	-5.03833	0.00106468
OG0000781	-1.88893	0.0144877	1.16214	0.29088	3.05107	0.0144974
OG0000782	2.10239	0.246363	-1.26846	0.475213	-3.37085	0.0993505
OG0000783	-6.84033	0.000421634	-7.44319	0.000421951	-0.602852	0.209724
OG0000785	0.49198	0.719595	-7.43458	0.000255577	-7.92656	0.000210399
OG0000786	-0.68263	0.573106	-7.46195	0.000230968	-6.77932	0.000342135
OG0000787	-3.28852	0.0748899	-3.46673	0.0806168	-0.178209	0.89755
OG0000788	-2.64961	0.150137	1.84035	0.500045	4.48996	0.0872313
OG0000789	-1.5081	0.0994505	-2.17569	0.0414814	-0.667584	0.455941
OG0000790	0.253155	0.799026	-7.3757	0.000105009	-7.62886	8.45403e-05
OG0000793	0.7674	0.424486	-2.26831	0.0164524	-3.03571	0.00751904
OG0000795	-2.91108	0.0590696	-6.30848	0.00139576	-3.3974	0.00817852
OG0000796	0.904778	0.239411	-1.61889	0.0389471	-2.52367	0.00828879
OG0000797	-0.358445	0.805681	-3.72236	0.0229061	-3.36392	0.0325269
OG0000798	5.68673	0.000769471	6.48479	0.00118146	0.798056	0.592622
OG0000799	10.4166	2.4747e-05	-0.696029	0.0236002	-11.1126	3.98169e-05
OG0000800	3.91277	0.0293443	-0.822834	0.398001	-4.7356	0.0158903
OG0000801	2.46349	0.0105044	5.69308	0.00159922	3.22959	0.0290166
OG0000804	-1.12097	0.243339	-0.0481135	0.97193	1.07286	0.346802
OG0000806	2.19392	0.0285196	1.22219	0.210708	-0.971732	0.374848
OG0000807	-4.65102	0.0255053	-0.939249	0.718113	3.71178	0.094866
OG0000808	-2.28879	0.0963731	-2.11776	0.159649	0.17103	0.880448
OG0000810	7.64583	7.91223e-05	2.38959	0.014749	-5.25624	0.0017113
OG0000811	1.25421	0.236783	-3.52659	0.0039673	-4.7808	0.00134369
OG0000812	4.41294	0.000698941	4.90684	0.00170271	0.493905	0.693281
OG0000813	-3.72338	0.00353326	-9.41573	5.20712e-05	-5.69235	0.000101935
OG0000814	-1.48555	0.0284439	-3.63614	0.000426901	-2.15059	0.00102064
OG0000815	10.9954	0.000189353	2.95686	0.000662778	-8.03851	0.00150511
OG0000816	2.3443	0.246135	2.18639	0.357804	-0.157917	0.958134
OG0000817	-6.68652	5.24348e-05	-6.49544	0.000114038	0.191084	0.534604
OG0000819	8.95532	1.98273e-05	1.59058	0.000363217	-7.36474	6.70158e-05
OG0000820	3.56379	0.000712216	4.10804	0.00168238	0.544251	0.599949
OG0000821	-1.74132	0.144328	-2.69144	0.0469052	-0.950125	0.389454
OG0000822	-2.49717	0.105753	-3.34764	0.0470337	-0.850478	0.381925
OG0000823	-7.08488	0.000172554	-6.73285	0.000419943	0.352035	0.536472
OG0000824	-1.07327	0.511417	-7.73488	0.000654148	-6.66161	0.00102991
OG0000827	1.07464	0.08643	-0.0594344	0.92573	-1.13408	0.105675
OG0000828	1.3005	0.117236	-0.115362	0.90028	-1.41586	0.133944
OG0000829	9.63652	0.000722003	-0.0820476	0.907672	-9.71857	0.00105158
OG0000830	1.42911	0.493327	-5.08153	0.00976045	-6.51064	0.00507116
OG0000831	-1.69926	0.0683363	-8.81012	4.82403e-05	-7.11086	4.27081e-05
OG0000832	6.63678	0.000138992	1.51311	0.0680666	-5.12367	0.00144602
OG0000833	0.606224	0.506385	0.551943	0.608672	-0.0542811	0.964467
OG0000834	1.35177	0.110846	-1.23237	0.0711118	-2.58414	0.0102401
OG0000835	2.47855	0.0134958	0.984396	0.250619	-1.49415	0.158395
OG0000836	-6.18049	0.000248476	-6.32989	0.000430252	-0.149392	0.849919
OG0000837	6.40356	0.000147527	3.84027	0.00143583	-2.56329	0.0426545
OG0000839	-2.78056	0.00151928	-0.765967	0.314907	2.01459	0.00775182
OG0000840	-2.75247	0.00143641	-3.52419	0.000658779	-0.771716	0.0745353
OG0000842	-0.163156	0.682104	3.30415	0.00607628	3.46731	0.00496656
OG0000843	6.85085	0.000273449	-0.585818	0.428105	-7.43667	0.000296991
OG0000844	-1.90151	0.35796	-10.1626	0.000449128	-8.26111	0.000929302
OG0000846	1.71249	0.00081239	3.14366	0.000732655	1.43118	0.0321271
OG0000847	0.0229525	0.994288	-3.03941	0.194803	-3.06236	0.196598
OG0000848	1.16967	0.0010898	10.26	5.65951e-05	9.0903	6.70158e-05
OG0000850	0.574599	0.25416	0.0913878	0.875012	-0.483211	0.40702
OG0000851	2.51156	0.00323105	2.4733	0.00986157	-0.0382619	0.969211
OG0000852	0.539975	0.493409	0.0576706	0.949282	-0.482304	0.589822
OG0000853	-0.347282	0.335026	3.6764	0.00447068	4.02368	0.00300311
OG0000854	0.430208	0.678945	-5.45254	0.000323713	-5.88275	0.000246567
OG0000855	-0.033016	0.991183	1.99812	0.563784	2.03113	0.559282
OG0000856	-1.53021	0.054977	-3.26368	0.00187122	-1.73347	0.0144455
OG0000857	-8.48656	7.97006e-05	-8.52344	0.000144781	-0.0368825	0.942342
OG0000858	-0.902328	0.0242535	-0.460806	0.266176	0.441523	0.248626
OG0000859	-14.4962	1.70644e-05	0.0321191	0.982501	14.5283	3.86637e-05
OG0000860	-0.756097	0.708386	-3.79239	0.050977	-3.03629	0.0857446
OG0000861	-1.6347	0.194853	-2.89064	0.0365757	-1.25594	0.226351
OG0000862	2.7202	0.00197412	4.63939	0.00520965	1.91919	0.162274
OG0000863	-11.2368	0.000642916	-9.89379	0.00178118	1.34297	0.0538338
OG0000864	0.129571	0.812234	-1.83218	0.00756074	-1.96175	0.00553245
OG0000865	6.30521	0.00370113	0.124674	0.845761	-6.18054	0.00577556
OG0000866	-4.67464	0.0277818	-6.45084	0.00695626	-1.7762	0.116764
OG0000867	-5.40994	0.0130194	0.954542	0.75083	6.36448	0.0246006
OG0000868	9.2659	0.000103273	0.824503	0.158989	-8.4414	0.000299563
OG0000869	3.24395	0.027545	4.92231	0.0723394	1.67835	0.547172
OG0000870	-1.73496	0.0654969	-2.25995	0.0338104	-0.524986	0.502633
OG0000871	-5.59013	0.0986642	-2.8322	0.484002	2.75793	0.433613
OG0000872	11.1225	2.15287e-05	1.03495	0.00652463	-10.0875	5.2367e-05
OG0000873	-0.717299	0.0802217	-0.891999	0.0581335	-0.1747	0.652062
OG0000874	-4.76916	0.00875023	-1.62228	0.414211	3.14687	0.0601841
OG0000875	4.23211	0.0810529	-1.67087	0.325407	-5.90298	0.0247247
OG0000876	-3.78749	0.000786638	4.18378	0.0482811	7.97127	0.00273316
OG0000877	4.59171	0.000161153	1.83716	0.00332895	-2.75455	0.00510317
OG0000878	6.13348	0.0145785	-0.538055	0.609412	-6.67153	0.0130776
OG0000879	-3.82862	0.000559906	-4.61298	0.000347489	-0.78436	0.0428171
OG0000880	-5.33995	0.0150553	-4.5997	0.0386123	0.740243	0.434244
OG0000881	-0.219466	0.943563	0.395774	0.916117	0.61524	0.869265
OG0000883	10.9063	0.0012439	-0.601426	0.195629	-11.5077	0.00137618
OG0000884	0.969948	0.028487	2.31478	0.00646312	1.34483	0.0661469
OG0000885	1.94668	0.282981	-8.00725	0.000590501	-9.95393	0.000267944
OG0000886	7.26529	0.000905707	2.15906	0.0142182	-5.10623	0.00937355
OG0000887	0.11743	0.946325	-2.87202	0.0927728	-2.98945	0.0848109
OG0000888	2.56427	0.29721	-0.20179	0.909426	-2.76606	0.294509
OG0000889	5.86339	0.00782297	-0.513152	0.732373	-6.37654	0.00777224
OG0000890	0.597172	0.192114	4.9734	0.00613225	4.37623	0.0116958
OG0000891	-7.60864	0.000629817	-3.65686	0.0599992	3.95178	0.0118704
OG0000892	5.94933	0.00168044	2.40983	0.0158042	-3.5395	0.0362414
OG0000893	2.67271	0.0101101	4.83857	0.00323462	2.16586	0.107358
OG0000894	0.14599	0.877101	0.262915	0.820075	0.116925	0.921673
OG0000895	3.36183	0.0727653	-3.44235	0.00634755	-6.80418	0.00354375
OG0000896	-3.86202	0.010211	-3.67206	0.0226002	0.189954	0.867698
OG0000897	-6.13363	0.000181757	-6.11566	0.000395607	0.017977	0.981546
OG0000899	-1.62438	0.0145431	1.07961	0.204351	2.70399	0.00674429
OG0000900	-3.7046	2.39136e-05	0.320398	0.49125	4.025	6.67388e-05
OG0000901	-7.53003	0.000903807	-4.80681	0.0199668	2.72322	0.0284381
OG0000902	2.60628	0.000650556	5.05302	0.00205304	2.44673	0.0544636
OG0000903	5.40931	0.000291836	1.88138	0.0478714	-3.52793	0.00696122
OG0000904	-5.33486	0.00920561	-5.58924	0.0109052	-0.254378	0.832966
OG0000905	-0.57657	0.238242	-0.552137	0.323387	0.0244326	0.964467
OG0000906	2.05687	0.45666	-2.36742	0.309341	-4.42429	0.108182
OG0000907	-3.13982	0.000140413	1.07177	0.128419	4.2116	0.000319922
OG0000908	4.5882	0.0169009	-0.0662518	0.949282	-4.65445	0.0223676
OG0000909	-0.0790891	0.942955	-2.21218	0.0479671	-2.13309	0.0489844
OG0000910	10.0182	0.000514559	-1.18266	0.0437103	-11.2009	0.000431033
OG0000911	0.0296542	0.976167	-4.11363	0.000747075	-4.14328	0.00064165
OG0000912	1.80108	0.0537157	-2.06764	0.0106451	-3.86872	0.00218966
OG0000913	-0.0711163	0.969041	-6.95643	0.00150826	-6.88531	0.00170791
OG0000914	0.197855	0.947565	-5.16874	0.0365618	-5.36659	0.0327934
OG0000915	-8.94094	8.21644e-05	-7.38443	0.000464074	1.55652	0.0323001
OG0000916	-4.00501	0.0529655	-4.83154	0.0308564	-0.826522	0.366839
OG0000917	-4.7319	0.0213306	-3.31436	0.134229	1.41753	0.328858
OG0000918	-6.87853	0.000148456	-5.76979	0.000631313	1.10873	0.0314326
OG0000919	-6.11076	2.08972e-05	-5.9391	5.20712e-05	0.171654	0.373623
OG0000920	4.84583	0.0135522	0.249421	0.786968	-4.59641	0.0244366
OG0000921	1.49422	0.0137438	7.36849	0.00163385	5.87427	0.0054516
OG0000922	7.32286	0.000232107	-2.5425	0.000263363	-9.86536	8.94512e-05
OG0000923	5.10572	0.0308382	0.763752	0.645146	-4.34197	0.0869482
OG0000924	0.432735	0.854261	0.299503	0.914853	-0.133232	0.963178
OG0000925	6.31487	0.000123757	6.09383	0.00044142	-0.221036	0.850883
OG0000926	2.89594	0.103748	1.82209	0.336959	-1.07384	0.610849
OG0000927	2.65838	0.00170697	-0.714415	0.0846124	-3.3728	0.000811668
OG0000928	-2.35225	0.000361432	-0.246023	0.622919	2.10623	0.00137618
OG0000929	6.05898	0.00197412	-1.03381	0.108383	-7.09278	0.00122383
OG0000930	4.43091	0.00997616	-0.421051	0.694159	-4.85196	0.0095518
OG0000931	0.617462	0.462668	-2.67737	0.00869309	-3.29483	0.00397276
OG0000932	6.00811	0.00357338	1.40689	0.162467	-4.60122	0.0233713
OG0000933	-2.84062	4.52641e-05	1.41114	0.0259118	4.25177	0.00013083
OG0000934	4.56888	0.0135279	0.0917992	0.946833	-4.47708	0.0236193
OG0000935	-1.17535	0.0825978	-0.237097	0.777524	0.938252	0.197925
OG0000936	3.32453	0.0012967	-0.57428	0.319992	-3.89881	0.0010498
OG0000937	-0.249324	0.826496	-1.29878	0.275404	-1.04945	0.371641
OG0000938	-4.17268	0.256731	-10.0415	0.0117654	-5.8688	0.0207996
OG0000939	4.83325	0.0497651	1.18964	0.551178	-3.64361	0.187879
OG0000940	1.51497	0.000572942	2.67326	0.000540723	1.15829	0.0307389
OG0000941	-7.78352	3.833e-05	-4.74908	0.00147941	3.03444	0.00288663
OG0000942	4.96087	0.00300831	-4.58623	0.000689372	-9.54711	8.94512e-05
OG0000943	-1.99483	0.00734023	-0.723534	0.315806	1.2713	0.0553046
OG0000944	-0.408405	0.617196	-0.283941	0.770751	0.124464	0.89522
OG0000945	-8.00969	0.000238551	-10.051	0.000128142	-2.04135	0.00327724
OG0000946	-1.68691	0.144137	0.681826	0.690339	2.36874	0.129491
OG0000947	-2.87805	0.0384024	1.6317	0.406881	4.50975	0.026014
OG0000948	-1.25685	0.564505	1.97731	0.516624	3.23416	0.275451
OG0000949	4.65578	0.0830259	-3.07149	0.123088	-7.72727	0.00992347
OG0000950	1.06832	0.0106042	1.55663	0.00916676	0.488302	0.332913
OG0000951	-1.92979	0.0689183	-2.55526	0.0310794	-0.625468	0.422232
OG0000952	-0.400248	0.701475	2.97053	0.066208	3.37077	0.041592
OG0000953	0.833248	0.220133	0.36802	0.632549	-0.465228	0.57375
OG0000955	-8.85188	0.000152346	-9.68371	0.000167175	-0.831826	0.087449
OG0000956	-5.03758	0.000332746	-4.1233	0.00148498	0.914281	0.0346574
OG0000957	4.29606	0.151941	-1.35402	0.569506	-5.65008	0.0768338
OG0000958	-10.6799	1.70644e-05	-4.62869	0.00147062	6.05118	8.57172e-05
OG0000959	-3.85863	0.0414765	-2.39514	0.25472	1.4635	0.336412
OG0000960	5.91425	0.00106275	0.279344	0.763126	-5.63491	0.00259648
OG0000961	-5.25122	4.65704e-05	7.24014	0.00134267	12.4914	8.91376e-05
OG0000962	0.636161	0.282981	-0.296707	0.625559	-0.932868	0.15682
OG0000964	-0.670238	0.590827	3.45636	0.106888	4.1266	0.0567549
OG0000965	-0.429326	0.589785	1.33043	0.20295	1.75975	0.101124
OG0000966	3.58014	0.0100816	0.395098	0.579913	-3.18505	0.0255568
OG0000967	-0.217626	0.931428	-5.08575	0.0345446	-4.86812	0.0388284
OG0000968	-1.81425	0.125905	3.32579	0.0785478	5.14003	0.0129081
OG0000969	-3.713	0.00122157	1.13155	0.399806	4.84455	0.00410994
OG0000970	-0.0830205	0.910901	1.69156	0.0963267	1.77458	0.0823353
OG0000971	7.10751	0.000139899	1.79672	0.0385421	-5.31079	0.00181269
OG0000972	2.93906	0.000630274	-2.99881	6.17746e-05	-5.93787	4.27081e-05
OG0000973	-1.89948	0.0302289	1.34206	0.317165	3.24154	0.0235127
OG0000974	6.92115	0.000188438	-0.25744	0.721189	-7.17859	0.000285123
OG0000975	4.07048	0.0348688	3.9625	0.0793876	-0.107981	0.96997
OG0000976	7.80374	7.02705e-05	1.18585	0.0954173	-6.61789	0.000375007
OG0000977	-8.51877	4.04332e-05	-9.74802	5.59485e-05	-1.22925	0.00579571
OG0000978	3.34869	0.0514275	-0.441032	0.759449	-3.78972	0.0442986
OG0000979	-0.947781	0.127313	5.58597	0.0128453	6.53375	0.00634584
OG0000980	-2.64093	0.13209	-3.77733	0.0475864	-1.13641	0.418608
OG0000981	1.41693	0.0147611	0.124126	0.795198	-1.29281	0.0370811
OG0000984	10.4069	3.71608e-05	-0.871159	0.0140956	-11.2781	4.94572e-05
OG0000985	-0.429865	0.298541	0.971704	0.125384	1.40157	0.0355594
OG0000986	-0.590042	0.459324	-1.28597	0.149415	-0.69593	0.40656
OG0000988	0.792745	0.53159	-3.22381	0.026567	-4.01655	0.0116173
OG0000989	-0.559362	0.484464	0.587816	0.572742	1.14718	0.255518
OG0000990	0.97517	0.00431433	3.40292	0.000388844	2.42775	0.00214175
OG0000991	-1.28811	0.445096	-7.00035	0.00164608	-5.71223	0.00418834
OG0000992	-4.02291	0.0729671	-2.85763	0.245584	1.16527	0.456988
OG0000993	-0.824129	0.422444	-3.77849	0.0036764	-2.95436	0.00866226
OG0000994	-2.65124	0.115882	-4.97628	0.00945337	-2.32504	0.0560959
OG0000995	-5.47839	0.000390843	-0.838156	0.495454	4.64024	0.00126228
OG0000996	-2.42161	0.00204837	-1.02833	0.139996	1.39328	0.0217801
OG0000997	2.62402	0.482408	0.998531	0.813803	-1.62549	0.72618
OG0001000	2.56344	0.00129767	2.52188	0.00450443	-0.0415563	0.960081
OG0001002	3.20928	0.01016	4.36279	0.00901339	1.15351	0.430575
OG0001004	2.62912	0.169858	1.96531	0.355055	-0.663811	0.783748
OG0001006	1.73782	0.0421212	0.563803	0.480324	-1.17401	0.216309
OG0001007	-3.72374	0.0443907	-4.82832	0.0196021	-1.10458	0.440848
OG0001008	0.789902	0.412972	-2.5974	0.0143545	-3.3873	0.0054516
OG0001009	3.80217	0.034453	-0.395192	0.793957	-4.19737	0.0347804
OG0001011	-4.57001	0.000972535	-5.56027	0.00050454	-0.990261	0.0949489
OG0001012	2.20512	0.15463	-5.15489	0.00204083	-7.36001	0.000728285
OG0001013	0.253155	0.791023	-8.75565	5.20712e-05	-9.00881	3.98169e-05
OG0001014	-2.60055	0.000372275	0.696718	0.305934	3.29727	0.00096151
OG0001015	0.941344	0.23125	0.837195	0.35403	-0.104149	0.917923
OG0001017	-1.52552	0.106627	-3.30421	0.00531484	-1.77869	0.0165594
OG0001018	2.93177	0.022421	-7.36836	9.67086e-05	-10.3001	4.42362e-05
OG0001020	-5.85068	8.25535e-05	-7.58439	6.17746e-05	-1.73371	0.00018292
OG0001021	-0.299032	0.617285	1.03533	0.234953	1.33436	0.127262
OG0001022	0.0227657	0.980534	0.256815	0.80882	0.234049	0.827413
OG0001023	-0.497595	0.0563674	0.742198	0.0456547	1.23979	0.00485106
OG0001024	-0.649519	0.735418	-0.283182	0.905612	0.366338	0.875033
OG0001025	-2.25494	0.45298	2.08075	0.602755	4.33569	0.251589
OG0001026	-3.55179	0.00130562	-2.55069	0.0163	1.00109	0.159565
OG0001027	0.252307	0.915521	-6.79801	0.00403963	-7.05032	0.00375031
OG0001029	-2.19762	0.0339601	-5.88528	0.000378354	-3.68767	0.00269289
OG0001031	4.35991	0.0592526	3.45541	0.167794	-0.904505	0.759583
OG0001032	-0.632507	0.677407	-3.07103	0.063414	-2.43853	0.117322
OG0001033	-4.04204	0.0270911	-7.41846	0.00127416	-3.37642	0.00796753
OG0001034	1.3267	0.0111701	0.553101	0.224501	-0.773598	0.149832
OG0001035	-2.12036	0.000168417	-1.45851	0.00257945	0.661853	0.0358686
OG0001036	-1.11778	0.4125	2.31864	0.313295	3.43642	0.1275
OG0001037	7.44655	0.00194706	4.12127	0.0387754	-3.32528	0.153154
OG0001038	5.41969	0.002107	-1.37992	0.0585592	-6.79962	0.000841876
OG0001039	1.72642	0.00122997	2.30482	0.00200256	0.578404	0.299105
OG0001041	3.42237	0.15082	2.40422	0.36806	-1.01815	0.735107
OG0001043	-4.86658	9.56183e-05	-3.93736	0.000527515	0.929226	0.050897
OG0001044	1.76567	0.3065	0.365105	0.851573	-1.40057	0.485455
OG0001045	-2.73177	0.00921448	-5.226	0.000443032	-2.49423	0.00087832
OG0001046	5.22648	0.0143588	6.56668	0.0254053	1.3402	0.667917
OG0001049	1.31814	0.0582174	3.09764	0.0128292	1.77949	0.116829
OG0001050	2.4825	0.0338946	5.56931	0.0199373	3.08682	0.172178
OG0001053	-3.91889	0.253834	-4.09551	0.278987	-0.176625	0.961704
OG0001054	-10.0135	0.000116439	-8.7489	0.000401662	1.26458	0.0351965
OG0001056	-5.03862	1.70644e-05	-5.79115	1.66436e-05	-0.752528	0.00293818
OG0001058	-6.09526	0.00372748	-4.48665	0.0251809	1.60861	0.0985044
OG0001059	-3.13382	1.70644e-05	4.86508	0.000346197	7.99889	4.87921e-05
OG0001060	4.65396	0.000984723	2.58953	0.021163	-2.06443	0.098057
OG0001062	-3.77346	0.0453729	-0.31599	0.90028	3.45747	0.106967
OG0001063	-0.357281	0.444544	-0.165615	0.771323	0.191666	0.719672
OG0001064	0.739565	0.801623	3.47427	0.375558	2.7347	0.498304
OG0001065	6.03299	0.00461119	2.43699	0.0516478	-3.596	0.0798551
OG0001066	-1.57485	0.0262003	2.76035	0.0753218	4.33521	0.0124762
OG0001067	-0.0350506	0.980467	-0.366702	0.808528	-0.331651	0.822767
OG0001068	-0.578628	0.507313	-2.73188	0.0128721	-2.15325	0.0308486
OG0001069	3.49424	0.158106	-3.49805	0.0663406	-6.99229	0.0108305
OG0001070	3.75796	0.0225918	-1.48727	0.169318	-5.24523	0.00529493
OG0001071	-3.16366	0.00644026	-1.20784	0.311045	1.95581	0.0587858
OG0001072	0.816167	0.333433	3.81978	0.0102482	3.00362	0.0312684
OG0001074	-1.6675	0.0179081	-1.24523	0.0886979	0.42227	0.435623
OG0001075	-0.384102	0.293952	-0.708298	0.0951551	-0.324196	0.384236
OG0001076	-1.53138	0.0289094	1.69011	0.0836516	3.22149	0.00502185
OG0001077	-5.62276	0.0079947	-7.73441	0.00190311	-2.11165	0.0209037
OG0001078	1.24925	0.0917119	-1.90796	0.0102061	-3.1572	0.00164661
OG0001079	-1.92413	0.403918	-6.9805	0.00648794	-5.05637	0.0144974
OG0001080	-7.14754	0.00263554	-4.37216	0.0522563	2.77538	0.0470718
OG0001081	4.97521	0.0319315	1.90065	0.126161	-3.07456	0.191678
OG0001082	-11.2548	1.98273e-05	-9.86999	6.27888e-05	1.38481	0.00137162
OG0001083	0.453966	0.36422	1.37024	0.0731301	0.916279	0.215932
OG0001084	1.37378	0.00846259	2.2879	0.0064709	0.914113	0.193535
OG0001085	-12.2918	1.85486e-05	-9.22665	7.43283e-05	3.06516	6.21377e-05
OG0001086	-6.53055	0.127756	-15.739	0.00303741	-9.20842	0.00283504
OG0001087	5.11839	0.143335	0.474774	0.79359	-4.64362	0.211095
OG0001088	1.18638	0.00345785	2.27561	0.00132588	1.08923	0.0412672
OG0001089	2.44402	0.00607432	2.51457	0.0136686	0.0705512	0.944805
OG0001090	-1.37393	0.0117794	-0.471169	0.392757	0.902765	0.0813212
OG0001091	5.86712	0.0112676	7.99625	0.0178848	2.12913	0.529173
OG0001092	5.12754	0.000665424	0.821703	0.158839	-4.30584	0.00310329
OG0001093	10.8306	2.80325e-05	-0.164875	0.555205	-10.9955	4.94572e-05
OG0001094	3.30616	0.00402412	0.917126	0.272686	-2.38904	0.0375315
OG0001095	-5.33823	0.000125987	-7.80059	5.59485e-05	-2.46236	0.000114516
OG0001097	-0.825169	0.00533642	-0.060866	0.835898	0.764303	0.0164432
OG0001098	-3.09523	0.207421	0.855182	0.822302	3.95041	0.215121
OG0001099	0.470779	0.387206	7.38745	0.000348129	6.91667	0.000484056
OG0001100	4.63429	0.0282616	4.36357	0.0802011	-0.27072	0.931368
OG0001101	-4.77405	0.0337825	-2.97213	0.235761	1.80192	0.29842
OG0001103	10.1611	0.000157939	1.49683	0.00690556	-8.66424	0.000546842
OG0001104	-1.37501	0.0225398	0.480762	0.53692	1.85578	0.0235969
OG0001105	-2.39052	0.351809	-3.59517	0.193603	-1.20465	0.628583
OG0001106	-3.47266	0.127307	-0.779421	0.804276	2.69324	0.255682
OG0001108	-5.28355	0.015051	-6.70112	0.00621508	-1.41757	0.0636533
OG0001109	-2.78065	0.000198706	-1.21211	0.0282505	1.56854	0.00238144
OG0001110	2.61985	0.00974589	4.8802	0.0040754	2.26035	0.119587
OG0001111	7.73356	0.000265232	7.19896	0.00123957	-0.534597	0.771755
OG0001112	0.972723	0.0302184	0.654232	0.158497	-0.318491	0.522529
OG0001113	1.39838	0.0684169	1.86402	0.0580934	0.465638	0.641604
OG0001114	-1.47883	0.188109	-4.10959	0.00430067	-2.63076	0.0211658
OG0001115	8.41851	0.000545667	0.152877	0.769059	-8.26563	0.000927647
OG0001116	-2.60728	0.028927	-2.55844	0.0477084	0.0488384	0.956375
OG0001118	1.90724	0.0236572	-1.30996	0.0689665	-3.2172	0.0027755
OG0001119	-1.88872	0.63988	-1.72981	0.716131	0.158912	0.973319
OG0001121	6.12884	0.0151457	3.71193	0.0987759	-2.41691	0.407826
OG0001122	0.192762	0.77475	-1.30273	0.0556137	-1.49549	0.0352059
OG0001124	1.001	0.213428	-1.57932	0.0311387	-2.58031	0.00821724
OG0001125	-3.30486	0.325667	-3.90934	0.268983	-0.604479	0.843661
OG0001126	11.4798	2.33058e-05	4.57952	0.000270854	-6.90032	0.000562483
OG0001127	2.24677	0.0913448	-3.65881	0.0117186	-5.90558	0.00166605
OG0001128	1.32485	0.165294	-1.86578	0.0445655	-3.19064	0.00715206
OG0001129	1.21714	0.0251407	1.1011	0.073007	-0.116043	0.863541
OG0001130	-0.831793	0.183856	-1.94234	0.0110761	-1.11055	0.0501879
OG0001131	2.11167	0.0452059	4.71478	0.00868029	2.60311	0.107174
OG0001132	-0.479924	0.461747	5.0174	0.0412872	5.49733	0.0302944
OG0001133	1.10344	0.254308	7.34314	0.0164691	6.2397	0.0353508
OG0001134	1.78876	0.297514	-4.95855	0.0093508	-6.74731	0.00267863
OG0001135	6.52273	0.00502979	-3.19812	0.0123683	-9.72085	0.000583928
OG0001136	1.76781	0.013165	-0.877273	0.0767567	-2.64508	0.00248158
OG0001137	0.00116682	0.996409	0.274833	0.326607	0.273667	0.328957
OG0001138	4.07997	0.000342619	1.57521	0.00858272	-2.50476	0.00901831
OG0001139	5.27722	0.150287	0.671568	0.856443	-4.60565	0.272204
OG0001140	1.99001	0.048243	0.371485	0.667886	-1.61852	0.1393
OG0001141	-1.25653	0.672861	-10.3414	0.00230695	-9.08484	0.00264929
OG0001142	0.0387335	0.96703	4.65276	0.0131612	4.61402	0.013855
OG0001143	2.46129	0.22442	0.834137	0.705902	-1.62716	0.490099
OG0001144	1.08786	0.580856	-3.27948	0.0816729	-4.36734	0.0377249
OG0001145	2.12065	0.0292053	-1.69782	0.0399641	-3.81847	0.00221314
OG0001146	0.580084	0.145817	-0.618781	0.117802	-1.19886	0.0149674
OG0001147	3.08693	0.00605098	-1.24649	0.112665	-4.33342	0.00159484
OG0001148	4.63584	0.0194772	1.96063	0.257034	-2.67521	0.204596
OG0001150	8.0371	0.00075089	5.4052	0.0100719	-2.6319	0.222111
OG0001151	4.28366	0.0555001	1.79937	0.406506	-2.4843	0.32025
OG0001152	0.0958338	0.929296	-2.76302	0.0123612	-2.85886	0.0108157
OG0001153	1.72003	0.000636652	2.19816	0.000918878	0.478128	0.284216
OG0001154	-4.17247	0.00355229	-3.03944	0.0274004	1.13303	0.136008
OG0001155	-4.71835	0.00737357	-4.22122	0.0193272	0.497135	0.579956
OG0001156	8.64224	3.8141e-05	-4.71043	3.48585e-05	-13.3527	3.13798e-05
OG0001157	2.15633	0.479002	-5.1091	0.0368394	-7.26543	0.0171074
OG0001158	0.567798	0.322842	-2.22147	0.0018744	-2.78927	0.000907439
OG0001159	-0.997702	0.243084	-3.53033	0.0021215	-2.53262	0.00342899
OG0001160	-0.429206	0.864545	-1.7255	0.509012	-1.2963	0.618513
OG0001161	1.12329	0.252307	0.230757	0.834454	-0.892534	0.434153
OG0001162	0.593681	0.027545	0.0834472	0.757616	-0.510233	0.0805736
OG0001163	-4.88668	9.8505e-05	-3.47375	0.000933302	1.41293	0.00264774
OG0001164	-7.82866	0.00323722	-4.97952	0.0412978	2.84914	0.0254797
OG0001165	-2.24797	0.307823	-1.21696	0.644657	1.03101	0.675608
OG0001166	2.58392	0.000500103	0.0165738	0.965056	-2.56734	0.00100661
OG0001167	4.21052	0.0113631	0.0725914	0.95661	-4.13793	0.0211256
OG0001168	3.2771	0.127973	5.77001	0.0973859	2.49291	0.511171
OG0001169	7.28135	0.00223788	4.55849	0.0209235	-2.72286	0.246166
OG0001170	3.99193	0.000321543	0.316143	0.368563	-3.67578	0.000876216
OG0001171	-3.43677	0.0909367	-4.67981	0.0355926	-1.24304	0.192874
OG0001172	-6.39738	2.44304e-05	-5.31467	9.97343e-05	1.08271	0.00241882
OG0001173	1.47938	0.289854	-3.29744	0.025826	-4.77682	0.00730803
OG0001174	-4.05261	0.00135214	-3.12416	0.00850888	0.928449	0.0915033
OG0001175	0.12427	0.959932	-5.06706	0.0299726	-5.19133	0.0281066
OG0001176	-0.957963	0.0469243	-0.643287	0.218756	0.314676	0.487084
OG0001177	-4.95572	0.0063322	-6.9377	0.0014321	-1.98198	0.0131579
OG0001178	3.37756	0.00324242	8.44121	0.00428994	5.06365	0.0462879
OG0001179	1.27195	0.143927	-5.48338	0.000104506	-6.75533	6.70158e-05
OG0001180	1.85691	0.0274374	3.90866	0.00715331	2.05175	0.11122
OG0001181	-6.36711	0.00258753	-7.62917	0.00132477	-1.26206	0.0988979
OG0001182	2.33926	0.00240405	4.96944	0.00196031	2.63018	0.042595
OG0001184	7.35908	9.65218e-05	-3.71821	0.000128142	-11.0773	3.86637e-05
OG0001185	-6.16061	0.000184496	-4.64263	0.0013097	1.51799	0.00533061
OG0001186	3.17133	0.000414067	11.0697	0.000326474	7.89833	0.00188416
OG0001187	-5.13003	0.0129991	-5.46586	0.0125205	-0.335826	0.674286
OG0001188	7.87816	0.0136159	1.40043	0.209346	-6.47774	0.0419157
OG0001189	1.1682	0.101987	-0.502701	0.41132	-1.6709	0.0379706
OG0001190	0.861614	0.0115156	11.0496	0.000160292	10.188	0.000222855
OG0001191	2.25827	0.314833	-1.93179	0.164996	-4.19006	0.0761416
OG0001192	0.253155	0.791338	-10.8532	3.60861e-05	-11.1064	3.13798e-05
OG0001193	1.31183	0.423529	-4.51632	0.0105306	-5.82815	0.00450947
OG0001194	-0.0459711	0.925271	4.86228	0.00689492	4.90825	0.00688624
OG0001196	-1.55886	0.000812426	-1.90718	0.00056438	-0.348311	0.182876
OG0001197	0.586869	0.367899	1.81959	0.0954955	1.23272	0.25079
OG0001198	1.84317	0.462601	-2.16554	0.338277	-4.00871	0.123678
OG0001199	-3.91972	0.00620202	-1.05938	0.482402	2.86034	0.0406244
OG0001201	-3.19989	0.00311868	4.38589	0.0567215	7.58578	0.00534001
OG0001202	1.07728	0.576478	-0.487122	0.819237	-1.5644	0.468508
OG0001203	-5.08766	0.00244547	2.73431	0.218743	7.82197	0.00366497
OG0001204	-1.1077	0.000378374	-0.0238323	0.920538	1.08387	0.00113265
OG0001205	-1.58435	0.121631	4.21278	0.121919	5.79713	0.042595
OG0001206	1.15627	0.60527	2.85985	0.328331	1.70358	0.582053
OG0001207	0.604418	0.521688	0.784193	0.500328	0.179775	0.890152
OG0001209	3.83387	0.000841481	1.56312	0.0154191	-2.27075	0.0221503
OG0001210	-3.00985	5.0271e-05	-2.42128	0.000286657	0.588574	0.0245755
OG0001211	-4.71809	0.0118034	-8.11898	0.000746533	-3.40088	0.00383018
OG0001212	1.98417	0.00146722	3.02634	0.00274255	1.04217	0.183139
OG0001213	-4.05272	0.0970277	-9.38001	0.00172936	-5.32728	0.00883669
OG0001214	4.34097	0.0454164	-1.06017	0.255	-5.40113	0.0232903
OG0001215	3.70645	0.297296	-0.0749669	0.98239	-3.78141	0.34251
OG0001216	2.27522	0.0008233	0.281268	0.420631	-1.99395	0.0032066
OG0001217	6.08649	0.00220918	9.62012	0.0019892	3.53363	0.166727
OG0001218	4.35442	0.106465	2.63317	0.34094	-1.72125	0.601431
OG0001219	-6.4012	2.73589e-05	1.29686	0.185348	7.69806	7.64082e-05
OG0001220	1.32692	0.170635	2.36144	0.0846124	1.03451	0.460968
OG0001221	0.256763	0.254286	2.25585	0.000378733	1.99909	0.000677666
OG0001222	-1.84489	0.00511262	0.257994	0.736967	2.10288	0.0109901
OG0001223	-3.67036	0.0086946	-0.925707	0.517683	2.74465	0.0484631
OG0001224	5.81764	0.0834713	-0.243276	0.935867	-6.06092	0.0993134
OG0001225	-3.01351	0.0471691	-3.04388	0.0697645	-0.0303743	0.982959
OG0001226	-4.51468	0.0304234	-6.28408	0.00718163	-1.76939	0.145457
OG0001227	6.31513	0.00329954	-0.586634	0.476333	-6.90176	0.00298908
OG0001228	-5.98808	0.000145188	-6.92505	0.000128274	-0.93697	0.0225176
OG0001229	-3.04109	0.00142519	2.54755	0.102299	5.58864	0.00413011
OG0001230	0.927336	0.418204	3.92109	0.0333868	2.99375	0.0931455
OG0001231	1.03372	0.0675776	6.24705	0.00271155	5.21333	0.00715351
OG0001232	-1.54317	0.00472888	0.173638	0.774368	1.71681	0.00909027
OG0001233	4.17387	0.0777262	-1.87317	0.347483	-6.04704	0.0242498
OG0001235	-1.10422	0.214286	-0.566268	0.591298	0.537954	0.554171
OG0001236	5.85001	0.00938128	0.30951	0.746167	-5.5405	0.0173527
OG0001237	-2.26968	0.266673	-0.784001	0.775923	1.48568	0.50253
OG0001238	-1.65015	0.549411	-7.78686	0.00765856	-6.13671	0.011719
OG0001239	-0.790156	0.145913	0.0838574	0.909426	0.874013	0.177759
OG0001240	7.48845	8.04882e-05	-0.0087287	0.988382	-7.49717	0.000147346
OG0001241	-2.06176	0.482148	-5.76794	0.0479671	-3.70618	0.123042
OG0001242	2.85327	0.308369	2.63866	0.419345	-0.214611	0.955708
OG0001243	1.95177	0.000686039	0.502419	0.148296	-1.44935	0.00678083
OG0001244	-1.12192	0.00873452	0.564354	0.247171	1.68628	0.0054139
OG0001245	-5.70475	0.025753	1.61161	0.692759	7.31636	0.0507548
OG0001246	-6.25395	0.000683422	-2.99656	0.0590839	3.25739	0.0229478
OG0001247	3.63975	1.92299e-05	3.20501	7.72345e-05	-0.434739	0.28014
OG0001249	-3.28757	0.000505298	-4.25337	0.000232593	-0.965807	0.00927957
OG0001250	0.0206982	0.96664	-0.0649363	0.910295	-0.0856345	0.880448
OG0001251	-7.48561	0.000752476	-8.10755	0.000719529	-0.621932	0.432456
OG0001252	7.80298	0.000634956	4.7259	0.0046226	-3.07708	0.112646
OG0001254	-2.00354	0.0967072	-5.15142	0.0013674	-3.14789	0.00672637
OG0001255	-6.7668	0.000444451	-2.49393	0.11659	4.27287	0.00603221
OG0001256	3.27011	0.175685	-0.650106	0.68096	-3.92021	0.128516
OG0001257	4.11643	0.00271092	-1.52722	0.00859939	-5.64365	0.000757433
OG0001258	3.84313	0.131165	-0.604306	0.763126	-4.44744	0.102286
OG0001259	8.60784	4.20306e-05	1.64652	0.000576074	-6.96132	0.000176201
OG0001260	-0.322265	0.845948	-4.45895	0.0162497	-4.13668	0.0229147
OG0001261	0.274999	0.591773	4.2306	0.0128402	3.9556	0.0182716
OG0001263	0.305456	0.619951	-1.11602	0.0771352	-1.42147	0.0367748
OG0001264	6.31644	0.000571532	3.6923	0.00935696	-2.62414	0.0940271
OG0001265	0.592735	0.15657	0.23102	0.618475	-0.361715	0.457128
OG0001266	0.406581	0.862282	-2.01135	0.382081	-2.41793	0.30567
OG0001267	8.35642	9.12527e-05	4.339	0.00267203	-4.01742	0.0146219
OG0001268	-4.34144	0.00881138	-3.59087	0.0366109	0.750569	0.473339
OG0001269	-5.03622	0.00136854	-1.40111	0.305879	3.63512	0.0127306
OG0001270	-5.48487	0.0215034	-1.78568	0.508013	3.69919	0.111814
OG0001271	-2.85199	0.000315248	-1.97531	0.00413223	0.876677	0.0280369
OG0001272	0.565734	0.662553	-1.68594	0.15006	-2.25167	0.0797239
OG0001273	6.53019	0.000142808	1.54322	0.075485	-4.98697	0.00156786
OG0001274	7.06597	0.000581082	1.95473	0.0388855	-5.11124	0.00696734
OG0001275	3.49156	0.0703496	-0.153124	0.933238	-3.64468	0.086789
OG0001280	6.33881	0.000733793	3.70034	0.0134412	-2.63848	0.101836
OG0001281	-3.93697	0.000721708	-4.59686	0.000501132	-0.659892	0.0750238
OG0001282	-8.78887	0.000143182	-2.6194	0.118102	6.16947	0.00102064
OG0001283	5.1343	0.0113692	1.71231	0.279213	-3.42199	0.107392
OG0001284	3.9367	0.00135722	1.04396	0.0717951	-2.89273	0.0107719
OG0001286	0.205396	0.454064	2.81252	0.00141051	2.60712	0.00215583
OG0001287	3.66341	0.00269462	7.704	0.000623438	4.04058	0.0210904
OG0001288	-1.08494	0.0344814	-3.19706	0.000248351	-2.11213	0.000441179
OG0001289	0.0711421	0.801981	-0.820011	0.0178761	-0.891153	0.0119686
OG0001290	-5.72538	0.000976358	1.18865	0.517154	6.91403	0.00227722
OG0001291	1.03334	0.590827	-2.46927	0.168705	-3.50261	0.0788211
OG0001292	-0.405322	0.0787381	6.10189	0.000246763	6.50721	0.000180876
OG0001293	1.85433	0.00266161	0.664087	0.129177	-1.19024	0.0409629
OG0001294	2.72288	0.00855842	1.82196	0.0480261	-0.90092	0.403236
OG0001295	0.447999	0.599775	0.370033	0.713463	-0.077966	0.943187
OG0001296	-3.67628	0.000501073	-2.24109	0.0121032	1.43519	0.0115131
OG0001297	-0.438534	0.799729	-0.888647	0.646528	-0.450113	0.819828
OG0001298	5.7261	0.000402308	0.800876	0.367106	-4.92523	0.00211073
OG0001299	-2.87213	0.00492166	2.54246	0.177228	5.41459	0.0129884
OG0001300	-3.36504	0.0036457	-3.8594	0.00264503	-0.494367	0.400716
OG0001301	-2.73082	0.00343514	0.13999	0.893243	2.87081	0.00843895
OG0001302	3.69299	0.0591094	4.09597	0.0930204	0.402981	0.891437
OG0001303	-3.3811	0.0225267	-4.73898	0.00677762	-1.35789	0.243335
OG0001304	0.307953	0.528214	-0.226927	0.674254	-0.53488	0.324791
OG0001305	-2.79495	0.000231184	-0.445004	0.415247	2.34995	0.000975537
OG0001306	4.67883	0.000821542	-5.30035	0.00010268	-9.97918	3.86637e-05
OG0001307	2.7512	0.000351813	0.66092	0.0713488	-2.09028	0.00309019
OG0001308	0.198232	0.867255	-0.833938	0.504531	-1.03217	0.415605
OG0001309	-0.364165	0.513285	-2.21644	0.00313332	-1.85227	0.00433206
OG0001310	-5.28279	0.0073984	-7.8328	0.00126478	-2.55001	0.00471211
OG0001312	6.79697	0.000111314	4.09975	0.00103004	-2.69722	0.0355148
OG0001313	-7.57111	0.000669904	-7.4779	0.00108025	0.0932166	0.879915
OG0001314	0.551564	0.450164	1.54761	0.105552	0.99605	0.289552
OG0001315	3.1208	0.00234959	0.0679388	0.902485	-3.05286	0.00447993
OG0001316	-7.55415	9.26204e-05	-7.99687	0.000129823	-0.442724	0.395187
OG0001317	-8.18431	0.0141484	-2.29454	0.559974	5.88977	0.0580435
OG0001318	6.56132	0.00253326	-2.41131	0.00819843	-8.97264	0.00061316
OG0001319	-0.943005	0.00119882	0.524337	0.0635896	1.46734	0.000593294
OG0001320	-0.833441	0.625136	2.09568	0.362641	2.92912	0.201244
OG0001321	-2.80563	0.00512615	-0.898533	0.366363	1.9071	0.0302054
OG0001322	-1.88483	0.000127169	3.95625	0.000646973	5.84108	0.000107286
OG0001323	0.68411	0.0825978	3.95462	0.00273639	3.27051	0.00737566
OG0001324	-3.92872	0.0959414	-5.6151	0.034061	-1.68639	0.416838
OG0001326	0.504994	0.72628	-5.78314	0.00161458	-6.28814	0.00119008
OG0001328	2.14079	0.00832052	1.72449	0.0376288	-0.416299	0.641604
OG0001329	-0.948577	0.714133	-7.23035	0.00760838	-6.28177	0.0107558
OG0001330	-1.25524	0.59	-3.70532	0.135082	-2.45009	0.295092
OG0001331	-0.220498	0.839684	-0.0906843	0.946519	0.129813	0.920144
OG0001332	6.55039	0.000132249	-0.69191	0.271715	-7.2423	0.000134864
OG0001333	-4.38587	0.0995411	0.0928657	0.981332	4.47874	0.160053
OG0001334	-2.4731	0.00330083	0.173881	0.853972	2.64698	0.00764828
OG0001335	4.27555	0.000924675	6.17939	0.00106802	1.90385	0.174797
OG0001337	0.845923	0.406809	-2.24111	0.0247828	-3.08704	0.00874375
OG0001338	-0.991884	0.0118506	1.16659	0.0483055	2.15847	0.00296258
OG0001339	3.06531	0.0032786	-0.733694	0.184305	-3.799	0.0015777
OG0001340	4.14105	0.00348911	-5.89232	8.86483e-05	-10.0334	4.94572e-05
OG0001341	2.68972	0.176985	4.21866	0.123341	1.52895	0.609508
OG0001343	2.60124	0.00124128	9.64099	0.00022911	7.03975	0.00122113
OG0001346	3.85968	0.00282147	-0.91136	0.17402	-4.77104	0.00127245
OG0001348	0.237722	0.797884	-3.01542	0.00378123	-3.25314	0.00285105
OG0001349	-0.593355	0.178628	2.50947	0.0109322	3.10282	0.00379349
OG0001350	-2.01517	0.414503	-0.362619	0.909759	1.65255	0.563751
OG0001351	-6.45158	0.00460131	-3.09149	0.17436	3.36009	0.0875481
OG0001352	-7.68795	0.000884846	-10.289	0.00026444	-2.60109	0.00386062
OG0001353	1.01334	0.709068	2.24531	0.52898	1.23197	0.748625
OG0001355	4.1255	0.15406	0.903423	0.768899	-3.22207	0.332116
OG0001357	6.18679	3.08495e-05	3.98889	0.000101844	-2.1979	0.0118626
OG0001358	-2.77797	0.157899	-6.60354	0.00425338	-3.82556	0.0168684
OG0001359	1.00421	0.175056	0.342704	0.672948	-0.661508	0.445336
OG0001360	3.34871	1.8821e-05	-1.84832	7.39858e-05	-5.19703	1.94367e-05
OG0001361	-2.95325	0.000477237	6.3292	0.00427026	9.28245	0.000632588
OG0001362	1.97479	0.0715777	5.40804	0.034286	3.43326	0.163442
OG0001364	5.10414	0.00119154	1.96106	0.019876	-3.14308	0.0254646
OG0001365	4.16232	0.000244621	2.36053	0.00191995	-1.80179	0.0360565
OG0001366	1.50562	0.0509909	1.94888	0.0430567	0.44326	0.63636
OG0001367	-2.86705	0.000138992	-2.05707	0.00164478	0.809982	0.0332694
OG0001368	4.55661	0.0136649	1.7475	0.261439	-2.80911	0.144073
OG0001369	0.440245	0.511956	-1.97402	0.00817687	-2.41427	0.00395036
OG0001371	4.70126	0.000169684	0.990101	0.0480261	-3.71116	0.00128969
OG0001372	8.81979	0.00177672	4.56094	0.00159922	-4.25885	0.0680426
OG0001373	3.84594	0.00129383	3.15526	0.00737643	-0.690675	0.551411
OG0001374	3.77965	0.00548121	0.476541	0.468336	-3.30311	0.01661
OG0001375	-2.16721	0.0119957	-1.83653	0.0434178	0.330683	0.621802
OG0001376	0.0442399	0.906607	-3.51768	6.16642e-05	-3.56192	4.53077e-05
OG0001377	-0.61858	0.120084	-2.46601	0.000354361	-1.84743	0.000594278
OG0001379	2.01784	0.163171	-4.25251	0.00742653	-6.27036	0.00171421
OG0001380	0.781476	0.431737	-6.49182	0.000202975	-7.2733	0.000121108
OG0001381	-4.61957	0.010324	-6.40124	0.00235184	-1.78166	0.0434352
OG0001382	1.79839	0.00746845	-0.177645	0.733437	-1.97603	0.00873908
OG0001383	1.7609	0.0156848	-0.319815	0.537802	-2.08071	0.0111547
OG0001384	-0.495493	0.844392	-2.88735	0.19785	-2.39185	0.207232
OG0001385	2.55074	0.0126967	-3.97219	0.00012137	-6.52294	0.000144423
OG0001386	-1.67756	0.112685	3.94078	0.0862449	5.61834	0.0209665
OG0001387	10.3022	3.61168e-05	2.94634	0.00146069	-7.35585	0.000398333
OG0001388	2.97757	0.131518	-2.38417	0.0663271	-5.36173	0.014634
OG0001389	0.38552	0.618749	0.779422	0.420594	0.393902	0.697015
OG0001390	-2.44943	0.375806	-5.35421	0.0730752	-2.90478	0.273068
OG0001391	-2.29208	0.0137634	-3.01857	0.00508624	-0.726491	0.173953
OG0001392	6.51986	0.00469456	1.45394	0.254198	-5.06592	0.0304438
OG0001394	0.80711	0.384979	-3.34211	0.00392646	-4.14922	0.00176073
OG0001395	0.591277	0.0208918	-0.881359	0.00456135	-1.47264	0.000476187
OG0001396	3.72581	0.000584812	-0.737636	0.0481907	-4.46345	0.000364243
OG0001397	0.94597	0.133985	-3.13545	0.000299156	-4.08142	0.000192748
OG0001398	3.8208	0.000118741	1.70385	0.0028505	-2.11695	0.00531439
OG0001399	-0.481642	0.537051	3.26838	0.0176786	3.75003	0.00937355
OG0001400	5.19795	0.00473835	-1.28377	0.176607	-6.48172	0.00188028
OG0001401	-1.21315	0.031104	-3.00359	0.000510686	-1.79044	0.0014457
OG0001402	-5.14822	7.97006e-05	-4.0592	0.000434628	1.08902	0.0054029
OG0001403	-1.232	0.4971	0.955086	0.712012	2.18709	0.357755
OG0001404	-8.12502	0.00207568	-4.5047	0.0629458	3.62033	0.0224612
OG0001406	-0.731479	0.0493647	1.46973	0.030485	2.2012	0.00478911
OG0001407	2.76685	0.342057	-0.0314277	0.991964	-2.79828	0.398719
OG0001408	2.33873	0.028527	-1.92396	0.00903384	-4.26269	0.00197747
OG0001409	2.79587	0.0396723	4.41351	0.0219549	1.61763	0.375669
OG0001410	-0.179984	0.778749	0.783551	0.389746	0.963535	0.284814
OG0001411	1.30301	0.166152	-5.02094	0.000313302	-6.32396	0.000151441
OG0001412	-7.73745	0.000206399	-6.27996	0.00111549	1.45749	0.0295133
OG0001413	-0.509052	0.336881	-1.2689	0.0446	-0.759851	0.159946
OG0001414	1.78331	0.119306	0.0648193	0.948972	-1.71849	0.165487
OG0001416	-3.61615	0.0410499	-3.9257	0.0386123	-0.309546	0.811397
OG0001417	1.37336	0.313082	-2.37968	0.0896972	-3.75304	0.0227569
OG0001418	3.1373	0.0201075	-5.62923	0.000248351	-8.76652	9.45397e-05
OG0001420	-8.17513	0.0022728	-3.30024	0.207881	4.87489	0.0311311
OG0001421	1.84368	0.153559	4.11702	0.10838	2.27334	0.387647
OG0001422	1.36517	0.154397	5.03165	0.00392447	3.66648	0.0192258
OG0001423	6.15104	0.0602821	2.1826	0.439011	-3.96844	0.288837
OG0001424	-1.40273	0.00154387	2.57199	0.00391912	3.97472	0.000412669
OG0001425	-0.106887	0.924226	-0.0927552	0.944405	0.0141323	0.991136
OG0001426	-2.26729	6.69856e-05	2.52766	0.00277184	4.79495	0.0001251
OG0001427	0.0102038	0.997775	3.19996	0.463977	3.18976	0.469634
OG0001428	2.35712	0.016126	-5.01019	0.000109478	-7.36731	5.50524e-05
OG0001429	3.38452	0.110622	-1.82361	0.090222	-5.20814	0.028371
OG0001430	0.311609	0.362549	-3.03596	7.24385e-05	-3.34757	4.89397e-05
OG0001431	0.297346	0.623801	4.33311	0.00317436	4.03577	0.0048236
OG0001435	7.6507	0.000238784	3.12792	0.0067061	-4.52278	0.0104022
OG0001436	5.37654	0.00378179	1.37547	0.244289	-4.00107	0.0321033
OG0001437	-9.62974	0.000808026	-4.86	0.0449578	4.76974	0.00530753
OG0001438	-2.1874	0.0120277	-6.26905	8.8074e-05	-4.08165	6.9062e-05
OG0001439	-3.55567	0.000624325	3.35	0.0455905	6.90567	0.00161116
OG0001440	-1.68197	0.00543506	-1.92183	0.00459	-0.239865	0.513254
OG0001442	0.912467	0.0486199	-1.03718	0.0217853	-1.94965	0.00229863
OG0001444	11.9024	4.51982e-05	3.95143	0.000488376	-7.95093	0.000661658
OG0001445	-0.773244	0.0167783	2.8729	0.00110456	3.64614	0.000342135
OG0001446	1.13008	0.0144233	2.05828	0.0067061	0.928207	0.147646
OG0001447	-0.530904	0.712816	3.53726	0.175043	4.06816	0.11889
OG0001449	1.92332	0.444394	-2.23943	0.196585	-4.16274	0.0966703
OG0001450	1.98552	0.00970308	-0.418324	0.381556	-2.40384	0.00579571
OG0001451	1.51359	0.548855	0.082187	0.977385	-1.43141	0.625596
OG0001452	-1.95258	0.000262393	0.117248	0.777252	2.06982	0.000659169
OG0001453	3.90619	0.0104266	-2.39721	0.0177183	-6.30341	0.000915903
OG0001454	-2.22492	0.000890472	-2.11702	0.0020823	0.107896	0.740304
OG0001455	-0.996997	0.0321181	-0.206513	0.700105	0.790484	0.107902
OG0001456	0.91796	0.012508	-1.99942	0.000199339	-2.91738	6.66608e-05
OG0001457	-3.32162	0.00120323	-3.544	0.00133754	-0.222373	0.556892
OG0001458	6.72986	0.00671222	0.261801	0.706231	-6.46806	0.0109505
OG0001459	0.253155	0.804089	-8.42102	6.60852e-05	-8.67418	5.12452e-05
OG0001460	-3.3775	0.0886054	-0.663295	0.808112	2.71421	0.204596
OG0001461	8.29414	3.06507e-05	1.33572	0.0303976	-6.95842	0.000156345
OG0001462	-2.36091	0.0324146	0.452022	0.763441	2.81293	0.0429481
OG0001463	-2.91259	0.00226421	-1.38409	0.0989367	1.5285	0.0227917
OG0001464	3.5901	0.00917203	-2.7991	0.00135486	-6.3892	0.000607534
OG0001465	-2.40705	0.13642	-2.87342	0.105658	-0.466375	0.753294
OG0001466	4.67281	0.00957163	-1.09517	0.25472	-5.76799	0.00414557
OG0001467	0.195459	0.333744	4.26267	0.00023066	4.06721	0.000280618
OG0001468	7.16727	0.000552815	8.4801	0.000893548	1.31283	0.499617
OG0001469	-0.164343	0.550319	5.68677	0.000975569	5.85112	0.000915903
OG0001470	-3.43934	0.00122269	1.94204	0.146556	5.38138	0.00196719
OG0001471	-5.10871	0.000291475	-3.40053	0.00669278	1.70818	0.0373756
OG0001473	-2.77479	0.000117229	-0.478762	0.294987	2.29603	0.000499601
OG0001474	-0.241317	0.33821	0.240418	0.425957	0.481736	0.123731
OG0001475	7.53416	0.00546717	3.81513	0.0505104	-3.71903	0.178978
OG0001476	6.30191	0.00358376	0.7874	0.286179	-5.51451	0.0102276
OG0001477	-2.05531	0.0162491	-3.49197	0.0014925	-1.43665	0.0145246
OG0001478	1.0761	0.0027524	7.34393	0.000231988	6.26782	0.000470541
OG0001479	-1.93536	0.00430475	-1.97202	0.00658364	-0.0366585	0.932531
OG0001480	2.71778	0.0102197	1.07019	0.161177	-1.64759	0.126107
OG0001481	2.39352	0.0490954	-4.43951	0.00101205	-6.83304	0.000280618
OG0001482	0.388513	0.672539	4.14223	0.0588291	3.75371	0.084952
OG0001484	-8.54584	0.0016976	-8.96346	0.00181233	-0.417624	0.429343
OG0001485	4.23236	1.8821e-05	4.27338	5.88869e-05	0.0410206	0.933292
OG0001486	-2.3059	0.379084	-8.42466	0.00438795	-6.11876	0.0130663
OG0001487	-2.07865	0.0635396	-0.553807	0.675662	1.52484	0.206739
OG0001488	-0.481036	0.13123	-0.166866	0.651515	0.314169	0.376066
OG0001489	-4.33031	5.54894e-05	-1.98732	0.00554663	2.34299	0.00028765
OG0001490	3.12858	0.229857	-1.74922	0.380299	-4.87779	0.0687795
OG0001491	4.52226	0.00733551	6.57733	0.0102062	2.05507	0.392434
OG0001492	-4.87235	0.00119743	-7.64756	0.000143204	-2.77522	0.00462905
OG0001493	4.20275	0.0192925	-2.20374	0.034958	-6.40648	0.00261322
OG0001494	-8.11092	5.52103e-05	-4.36571	0.00475352	3.74521	0.00239432
OG0001495	8.46872	0.000650556	5.04879	0.0119194	-3.41993	0.126375
OG0001496	4.44168	0.0174946	6.18674	0.011409	1.74506	0.437707
OG0001497	4.14589	0.00195653	7.09086	0.0014405	2.94497	0.0924665
OG0001498	6.91221	0.000824675	5.3445	0.0054137	-1.5677	0.401691
OG0001499	2.68939	0.0169476	1.75006	0.110441	-0.939327	0.459379
OG0001500	-2.43803	0.016126	-0.778553	0.482211	1.65948	0.0754767
OG0001501	10.4617	0.00535346	5.00221	0.0258659	-5.45951	0.13283
OG0001502	2.23939	0.000328465	-0.123343	0.661883	-2.36273	0.000467057
OG0001504	0.124819	0.870948	2.50782	0.116183	2.383	0.137328
OG0001505	-4.43036	0.044443	-1.90305	0.450256	2.52731	0.15802
OG0001506	0.12427	0.746321	-2.05412	0.000780456	-2.17839	0.000582518
OG0001507	0.10562	0.92248	-3.29848	0.00453935	-3.4041	0.0039697
OG0001508	-5.98262	0.00225296	-4.33988	0.0244874	1.64274	0.169847
OG0001509	-4.51693	0.022498	-3.95255	0.055831	0.564381	0.612335
OG0001510	1.36042	0.000318217	3.82432	0.000163087	2.4639	0.0013228
OG0001511	0.221278	0.917798	-4.78824	0.0233564	-5.00952	0.0209264
OG0001512	6.28785	0.0057889	3.21459	0.0879413	-3.07326	0.185779
OG0001513	-6.73278	0.000349722	-7.02929	0.000496378	-0.296502	0.704433
OG0001514	-3.04465	0.121241	-5.15793	0.0196946	-2.11328	0.0567109
OG0001515	0.833125	0.764469	-5.37344	0.0248872	-6.20656	0.0176593
OG0001516	-0.468429	0.340281	3.59037	0.0121751	4.0588	0.00696958
OG0001517	-0.660671	0.827572	-0.613052	0.864886	0.047619	0.989038
OG0001518	-1.03262	0.0190082	-0.26813	0.559444	0.764489	0.0920567
OG0001519	2.92419	0.00205373	1.2294	0.0758347	-1.69479	0.0585242
OG0001520	5.57912	0.000442355	3.96419	0.00405012	-1.61493	0.224282
OG0001521	4.22777	0.00546717	-4.3491	0.00112938	-8.57686	0.0001251
OG0001522	-0.328441	0.0725477	7.52845	8.86483e-05	7.85689	6.71328e-05
OG0001523	9.59166	0.000221593	0.42599	0.30736	-9.16567	0.000435455
OG0001524	4.85062	0.0515264	4.91972	0.102891	0.0690974	0.985809
OG0001525	6.39304	0.00541113	1.35025	0.256588	-5.04279	0.0297547
OG0001526	2.61824	0.0319737	-0.787063	0.310797	-3.4053	0.0125989
OG0001527	0.863569	0.00731729	2.72619	0.000573378	1.86262	0.00406045
OG0001528	-1.8089	0.262099	-8.33777	0.000437097	-6.52887	0.00111917
OG0001529	0.941297	0.08914	-1.15166	0.0324415	-2.09296	0.00432033
OG0001530	-7.91834	6.05323e-05	-8.77857	7.72345e-05	-0.860234	0.0612242
OG0001531	-2.52667	0.0324701	-3.44869	0.0101986	-0.922016	0.191272
OG0001532	-5.24423	0.00222755	-5.97482	0.00159922	-0.73059	0.261317
OG0001534	-3.95036	0.0341335	-0.165681	0.949683	3.78468	0.0803696
OG0001535	3.33574	0.000111702	3.74908	0.000411816	0.413337	0.547285
OG0001536	3.19774	0.00224709	4.77883	0.00582265	1.58109	0.280695
OG0001537	-1.53583	0.435786	-3.65329	0.0665985	-2.11747	0.151975
OG0001538	-3.80402	0.00238971	-1.51682	0.173669	2.2872	0.0135068
OG0001539	1.51856	0.126238	-0.736564	0.430673	-2.25512	0.0474478
OG0001540	10.5926	2.33058e-05	-0.260948	0.325064	-10.8536	4.05428e-05
OG0001541	1.20034	0.0260281	1.02273	0.0859317	-0.17761	0.782894
OG0001543	2.15089	0.118647	5.92312	0.0298002	3.77223	0.159665
OG0001544	-1.03556	0.242145	-1.10926	0.265498	-0.0737021	0.940428
OG0001545	-0.34144	0.335298	-0.246577	0.553731	0.0948627	0.81969
OG0001546	5.54853	0.000298261	2.59671	0.0041923	-2.95182	0.0181035
OG0001547	7.50412	0.000259587	-0.315978	0.429853	-7.8201	0.000334996
OG0001548	10.0119	0.00137179	-3.2043	0.000202975	-13.2162	0.000493404
OG0001549	9.97243	3.79574e-05	1.62372	0.00848417	-8.34871	0.000164481
OG0001550	-4.56365	0.0132459	-1.46738	0.482316	3.09627	0.0800674
OG0001551	4.38923	0.0161567	1.39297	0.281706	-2.99626	0.123057
OG0001552	2.49021	0.430479	-3.53361	0.142215	-6.02382	0.0503721
OG0001553	-1.57025	0.375748	-5.97272	0.00382515	-4.40247	0.00795311
OG0001554	1.16929	0.613335	-5.27403	0.0152746	-6.44331	0.00887246
OG0001555	4.28769	0.000523366	0.871571	0.0676167	-3.41612	0.00310297
OG0001556	-0.647698	0.0867083	1.17115	0.06297	1.81885	0.00986406
OG0001557	7.64149	7.72314e-05	-0.502808	0.34135	-8.1443	9.48289e-05
OG0001558	-4.03024	0.00179305	1.5746	0.344367	5.60483	0.00583517
OG0001559	1.61851	0.0358278	1.76934	0.0542454	0.150831	0.87982
OG0001560	0.206261	0.800798	-0.0927133	0.924134	-0.298974	0.751197
OG0001561	-6.96726	0.00196462	-9.16961	0.000648591	-2.20235	0.00342796
OG0001562	3.61282	0.140992	-0.323255	0.889754	-3.93607	0.1469
OG0001564	-7.56997	6.66868e-05	-7.80656	0.000107485	-0.236597	0.423818
OG0001565	-2.5804	0.000976923	-0.860385	0.179994	1.72001	0.00742299
OG0001567	-9.86657	2.2137e-05	-7.11327	0.00020022	2.75331	0.000860482
OG0001568	2.32313	0.121789	-4.91407	0.00159922	-7.2372	0.000584722
OG0001569	3.94944	0.00104549	0.276589	0.561188	-3.67285	0.00255657
OG0001570	-0.924584	0.116975	-1.25063	0.0625604	-0.326048	0.540858
OG0001574	-5.48858	0.0143505	-2.78518	0.236179	2.70341	0.191065
OG0001575	2.80147	0.130492	-1.34031	0.274133	-4.14178	0.0381635
OG0001577	-10.7419	3.29515e-05	-7.18928	0.000471072	3.55265	0.000594278
OG0001578	1.21574	0.0402063	2.40039	0.0172114	1.18465	0.195616
OG0001579	-1.23811	0.223209	4.04046	0.113638	5.27857	0.0462678
OG0001580	-4.87551	0.000470384	-4.10212	0.00181555	0.773387	0.0769576
OG0001581	-3.78875	0.0509398	-1.1899	0.622293	2.59885	0.159981
OG0001582	6.89266	0.00343643	1.33146	0.117439	-5.5612	0.0147458
OG0001583	-7.5103	0.000665848	-6.3611	0.00317465	1.1492	0.21506
OG0001584	9.76672	2.45041e-05	2.05381	0.00282954	-7.71291	0.000137775
OG0001585	-1.93727	0.270452	-2.65526	0.174135	-0.717988	0.691086
OG0001586	0.587654	0.605152	3.79395	0.130168	3.2063	0.204308
OG0001587	-1.62642	0.00111341	4.58033	0.00271427	6.20676	0.000627924
OG0001588	6.3554	0.0105008	-0.87166	0.332708	-7.22706	0.00749779
OG0001589	2.31312	0.242802	-8.40569	0.000623438	-10.7188	0.000282232
OG0001590	0.637123	0.409735	-2.87535	0.0021169	-3.51248	0.001065
OG0001591	-2.26585	0.19713	-3.38537	0.0861677	-1.11952	0.509459
OG0001592	2.09452	0.288939	-5.09287	0.0127007	-7.18739	0.00344957
OG0001593	4.07494	0.0205552	1.38145	0.339381	-2.69348	0.160908
OG0001594	8.79515	5.08493e-05	-0.59308	0.152804	-9.38823	6.66608e-05
OG0001595	-1.49269	0.0409682	2.28738	0.0643691	3.78007	0.00668368
OG0001596	3.45458	0.000618716	-1.07163	0.00917659	-4.52621	0.000249046
OG0001597	-2.5146	0.00999477	3.95624	0.00993227	6.47085	0.000716381
OG0001598	11.7289	1.70644e-05	4.45047	7.39858e-05	-7.27844	0.000102279
OG0001599	8.90462	0.00242029	5.45989	0.0286583	-3.44473	0.245158
OG0001600	-1.59153	0.0425318	-3.32928	0.00157469	-1.73775	0.00788283
OG0001601	-1.39656	0.0883174	2.17067	0.0757966	3.56722	0.009254
OG0001602	6.16953	0.000138992	0.733768	0.320902	-5.43576	0.000628275
OG0001603	-8.99878	7.74216e-05	-9.08736	0.000134396	-0.0885768	0.846437
OG0001604	-2.27183	0.107191	1.68198	0.391066	3.95381	0.0491048
OG0001605	0.632384	0.603355	-1.19553	0.284272	-1.82791	0.138495
OG0001606	-6.12495	0.00301155	-2.37116	0.239259	3.75379	0.0250236
OG0001607	-6.03084	4.85937e-05	-6.24463	8.14445e-05	-0.213794	0.332564
OG0001608	0.0568255	0.912125	0.0764861	0.903495	0.0196605	0.975545
OG0001609	0.211379	0.940809	-5.26058	0.0305235	-5.47196	0.0278255
OG0001611	-9.7634	1.8821e-05	-10.2333	3.75481e-05	-0.469906	0.0592539
OG0001612	0.115531	0.904286	4.64623	0.0341712	4.5307	0.03866
OG0001613	5.93378	0.000176086	-1.68516	0.0176446	-7.61894	7.67875e-05
OG0001614	-3.76725	0.00060963	-2.89446	0.00466662	0.872789	0.0847517
OG0001615	1.76003	0.195427	-1.58557	0.145274	-3.34559	0.0253068
OG0001616	6.59809	0.00301464	0.651604	0.47511	-5.94649	0.00820705
OG0001617	-2.20551	0.342598	-7.61721	0.00467384	-5.4117	0.016381
OG0001618	3.53111	0.26925	-1.20496	0.667809	-4.73607	0.163173
OG0001619	7.46257	0.000201394	-3.94097	0.000183834	-11.4035	4.58351e-05
OG0001621	-1.20163	0.193101	-2.48753	0.0195864	-1.2859	0.0942815
OG0001622	6.87413	0.0134327	6.06691	0.0390498	-0.80722	0.825776
OG0001623	-0.920645	0.113764	1.14357	0.21984	2.06421	0.0367748
OG0001624	-1.56516	0.0121581	0.816601	0.326471	2.38176	0.0121665
OG0001626	-3.6125	0.000740721	5.80881	0.00275226	9.42131	0.000186332
OG0001627	0.319897	0.340288	5.24346	0.000486812	4.92356	0.000684232
OG0001628	-0.944642	0.0332659	-4.15375	5.65951e-05	-3.2091	4.4939e-05
OG0001629	3.34409	0.134263	3.79077	0.176775	0.446686	0.896668
OG0001630	-0.212485	0.321383	0.488553	0.0878424	0.701038	0.023913
OG0001631	7.6744	0.000803607	6.33237	0.00453139	-1.34203	0.528555
OG0001632	5.8366	0.000402308	8.47139	0.00156445	2.63478	0.192578
OG0001633	-3.84186	0.0267229	-1.58168	0.400281	2.26017	0.182535
OG0001634	-0.768903	0.0939443	4.96314	0.00373828	5.73205	0.00185862
OG0001635	-0.259977	0.727365	5.23235	0.00907039	5.49233	0.00714336
OG0001636	-0.417941	0.62123	3.54054	0.0162973	3.95848	0.0098931
OG0001637	-0.0332776	0.899136	-0.90545	0.00858114	-0.872172	0.00963774
OG0001638	-3.95688	3.61168e-05	-1.04994	0.0493633	2.90693	0.000134639
OG0001639	-1.43	0.204978	-0.830341	0.537477	0.599663	0.600145
OG0001640	-0.789586	0.00116855	0.250788	0.213685	1.04037	0.000934944
OG0001641	4.78688	0.0394363	7.82029	0.0419452	3.03341	0.447846
OG0001642	-1.77995	0.0199859	-2.94504	0.00222702	-1.16509	0.0458031
OG0001643	3.14898	0.000177403	2.63831	0.000963782	-0.510678	0.408516
OG0001644	5.27255	2.4823e-05	5.79689	0.000122966	0.52434	0.509391
OG0001645	-0.272913	0.910901	-4.02117	0.0745616	-3.74826	0.0876916
OG0001646	-1.05155	0.211549	3.49989	0.0567267	4.55144	0.0188134
OG0001647	2.92177	0.000223744	1.41786	0.0051823	-1.50391	0.0162938
OG0001648	-2.34612	0.199961	-1.55383	0.474741	0.792293	0.672429
OG0001649	-3.43903	0.000111359	6.32168	0.00103556	9.76071	0.000120683
OG0001650	-1.28333	0.000353322	1.44037	0.00207458	2.7237	9.33529e-05
OG0001651	6.51689	9.91927e-05	-1.14851	0.0573394	-7.6654	7.19271e-05
OG0001652	-1.48378	0.369498	-3.98446	0.0283164	-2.50068	0.101543
OG0001653	-4.41114	0.000542334	-2.21972	0.033871	2.19143	0.0060288
OG0001654	-5.78234	0.00464435	-3.14062	0.120799	2.64172	0.0666477
OG0001656	6.40133	0.00484845	1.79143	0.0577713	-4.6099	0.0327535
OG0001658	5.16885	0.0147181	4.76152	0.0435727	-0.407329	0.880508
OG0001659	-2.26814	0.00684956	0.539393	0.599812	2.80753	0.0111361
OG0001660	1.44865	0.083624	-2.99002	0.000847343	-4.43867	0.000493248
OG0001661	-1.14649	0.266577	-1.26577	0.270146	-0.119276	0.90658
OG0001662	-2.18449	0.487912	-6.5423	0.0321358	-4.35782	0.0674047
OG0001671	1.22641	0.000345679	3.68948	6.60852e-05	2.46307	0.000302757
OG0001672	-4.21987	0.00695336	-6.56597	0.000788383	-2.3461	0.00859169
OG0001674	-2.26395	0.152467	-7.65194	0.000654834	-5.388	0.00255062
OG0001675	7.87251	0.000272197	4.87347	0.00327971	-2.99904	0.0864517
OG0001677	3.10129	0.0113127	-0.457393	0.64072	-3.55869	0.0103642
OG0001678	3.35134	0.0129876	1.18698	0.308348	-2.16436	0.119088
OG0001679	0.41964	0.854465	-1.38457	0.540107	-1.80421	0.434286
OG0001680	-8.91451	2.4747e-05	-8.17212	7.72345e-05	0.74239	0.0726876
OG0001681	-0.949459	0.600332	-2.72966	0.163059	-1.7802	0.33577
OG0001682	-1.36505	0.00111388	1.82698	0.00538151	3.19203	0.000334996
OG0001683	8.82859	0.00280823	6.81049	0.0147947	-2.0181	0.518103
OG0001685	7.28982	0.00149887	6.22566	0.00830777	-1.06417	0.647607
OG0001686	-4.23891	0.000603462	-1.65471	0.108175	2.5842	0.0105229
OG0001687	-3.55793	0.0695464	-3.15701	0.135358	0.400913	0.798399
OG0001688	5.23159	0.00675193	-0.249001	0.834138	-5.48059	0.00815869
OG0001690	4.33077	0.0014649	-1.74748	0.00240651	-6.07824	0.00037769
OG0001691	1.09469	0.206681	2.77715	0.02872	1.68245	0.156327
OG0001693	6.93445	0.000138477	5.5173	0.000915237	-1.41715	0.28893
OG0001694	1.65592	0.175972	-1.72777	0.141007	-3.38369	0.0205548
OG0001695	-2.10517	0.178155	-2.66034	0.112003	-0.555167	0.596545
OG0001696	5.56237	0.000170522	3.65587	0.00225134	-1.90649	0.0846811
OG0001697	7.02584	0.000118123	-2.31773	0.00190806	-9.34358	4.94572e-05
OG0001698	-2.56051	0.00924228	-1.239	0.200249	1.32152	0.0780518
OG0001699	-3.85723	0.00167393	-6.22275	0.000174425	-2.36551	0.00344998
OG0001700	-6.31214	0.000618716	-1.27073	0.411953	5.04141	0.00524142
OG0001701	0.516966	0.55498	-5.47529	0.000155743	-5.99226	0.000108425
OG0001702	8.62121	0.000303915	1.21818	0.0590388	-7.40303	0.00117295
OG0001703	0.788229	0.145074	-1.34754	0.020208	-2.13577	0.00391981
OG0001704	4.00628	0.000510054	2.05401	0.00496763	-1.95227	0.0366082
OG0001705	1.31437	0.0559757	-1.5515	0.0126053	-2.86587	0.00208732
OG0001706	-3.38179	0.00204283	-3.93021	0.00139146	-0.548423	0.184995
OG0001707	1.80316	0.00647877	2.39218	0.00887312	0.589022	0.459709
OG0001708	-0.289755	0.407954	-1.47468	0.0037726	-1.18493	0.0082224
OG0001709	-0.450928	0.456222	-0.656507	0.341551	-0.205579	0.762781
OG0001712	7.15072	7.21857e-05	5.56353	0.000478491	-1.58718	0.189213
OG0001713	-6.95935	0.000272972	-7.81889	0.000248281	-0.859546	0.204134
OG0001714	6.29892	0.00731729	4.56074	0.0239509	-1.73818	0.490612
OG0001715	2.77476	1.70644e-05	5.71365	4.74287e-05	2.93888	0.000458378
OG0001716	4.02935	0.00431496	4.91731	0.00594322	0.887961	0.564193
OG0001718	-2.51948	0.0722479	-2.69634	0.083927	-0.176866	0.899583
OG0001719	4.69945	0.00811366	3.68235	0.0391046	-1.01711	0.585176
OG0001721	5.05284	0.013136	-2.22674	0.0493341	-7.27958	0.0022296
OG0001722	-2.66064	0.00845222	-2.28148	0.0265303	0.379161	0.513254
OG0001723	-0.0649607	0.963847	-4.13171	0.0075829	-4.06674	0.00800069
OG0001724	-3.87612	0.0254924	-3.07599	0.10156	0.800126	0.559282
OG0001725	2.07097	0.00153633	1.73192	0.00827203	-0.339048	0.579089
OG0001726	3.2453	0.00557636	-0.327764	0.609867	-3.57306	0.00506996
OG0001728	1.84676	0.0967705	4.96203	0.00962581	3.11526	0.0719769
OG0001729	-3.18275	0.0837546	-5.85895	0.00619937	-2.6762	0.032555
OG0001731	0.0590505	0.94698	0.0563408	0.956928	-0.00270975	0.997595
OG0001732	1.44564	0.507877	-4.00256	0.043311	-5.4482	0.0185752
OG0001734	-0.793573	0.0156384	-0.984077	0.0107115	-0.190505	0.48752
OG0001735	-7.16352	6.66868e-05	-6.49351	0.000253628	0.670016	0.27953
OG0001736	-2.25649	0.000900242	-4.26321	7.85712e-05	-2.00672	0.000162479
OG0001737	-4.5431	0.000835303	-2.64102	0.0201798	1.90208	0.0100484
OG0001741	6.25467	0.00105111	2.78323	0.0424445	-3.47144	0.0453307
OG0001742	-5.36401	7.38372e-05	-4.67947	0.000255004	0.684539	0.0430308
OG0001743	0.290923	0.809307	-1.14989	0.316378	-1.44081	0.216309
OG0001745	-1.10032	0.132795	-0.597732	0.484521	0.502586	0.495694
OG0001747	-4.52765	0.000326365	-4.54344	0.000513446	-0.0157927	0.964467
OG0001748	4.93684	0.00474073	-3.46001	0.00147941	-8.39685	0.000324804
OG0001749	-5.79869	0.000577085	0.0321191	0.982108	5.83081	0.00171433
OG0001750	6.25205	0.00355814	3.04136	0.0891087	-3.21068	0.126817
OG0001751	2.0113	0.000916401	0.189806	0.560168	-1.8215	0.00301513
OG0001753	0.378439	0.335195	1.18985	0.0540665	0.811412	0.168704
OG0001754	-8.24857	2.44304e-05	0.0321191	0.977385	8.28069	7.51954e-05
OG0001755	2.97729	0.0128272	1.18815	0.245513	-1.78913	0.155804
OG0001757	0.363622	0.866517	-2.92417	0.159771	-3.28779	0.126534
OG0001759	3.30964	0.252486	-8.64446	0.00256867	-11.9541	0.00112786
OG0001760	4.10278	0.0658352	-1.95579	0.295217	-6.05856	0.0179973
OG0001761	1.84225	0.234714	-2.25101	0.130034	-4.09326	0.0246268
OG0001763	3.68668	0.000340175	4.95637	0.000513032	1.26969	0.189955
OG0001764	-0.250442	0.931897	-3.1938	0.255847	-2.94335	0.292389
OG0001765	-7.97862	0.00457717	-3.7019	0.199323	4.27673	0.0663214
OG0001766	-1.82383	0.0333973	-3.37503	0.00259012	-1.5512	0.0453133
OG0001767	-2.95269	0.00393893	-1.08847	0.269272	1.86422	0.044795
OG0001768	-0.769677	0.636162	-5.67515	0.00381528	-4.90548	0.00604805
OG0001769	2.8008	0.0056297	0.138422	0.860397	-2.66238	0.0135799
OG0001770	3.3917	0.0725822	1.1508	0.519944	-2.2409	0.302469
OG0001771	-6.85111	0.000165135	-5.70662	0.00107797	1.14449	0.166739
OG0001772	3.31815	0.0172446	-1.17246	0.125879	-4.49061	0.0051603
OG0001773	-2.84247	0.330306	-7.79459	0.0121032	-4.95212	0.0483385
OG0001774	7.60685	0.0010339	2.48412	0.0332178	-5.12273	0.0167039
OG0001775	-0.336134	0.884705	-5.04389	0.026916	-4.70776	0.0329679
OG0001776	-2.08682	4.56134e-05	-1.10532	0.00245324	0.981493	0.0018105
OG0001777	4.62048	0.00151761	1.20873	0.195564	-3.41175	0.015962
OG0001778	8.9869	0.00010702	0.370923	0.360975	-8.61598	0.000217835
OG0001780	-2.08632	0.0499799	-1.95415	0.0874542	0.132176	0.872524
OG0001781	-3.63128	0.000414895	3.54542	0.0153774	7.1767	0.000375753
OG0001782	3.70281	0.00620193	1.91163	0.104745	-1.79118	0.172787
OG0001783	-1.30941	0.327208	-4.54348	0.00482708	-3.23407	0.0144282
OG0001784	-6.15622	0.000319736	-6.85544	0.000300912	-0.69922	0.194291
OG0001785	1.05577	0.0166359	-1.95657	0.000378733	-3.01234	0.00011879
OG0001786	1.66422	0.256731	-3.38699	0.0350459	-5.05121	0.00737566
OG0001787	4.33669	0.0204334	-3.73728	0.00126659	-8.07396	0.00119123
OG0001789	5.04913	1.70644e-05	1.78612	0.000173529	-3.26301	6.42644e-05
OG0001790	4.45163	0.00273428	1.91239	0.0960358	-2.53924	0.0688189
OG0001791	-2.60752	0.0210511	-6.08902	0.000409222	-3.4815	0.0040863
OG0001792	-4.46811	0.047137	-6.09059	0.0160124	-1.62248	0.0677694
OG0001793	4.19365	0.0217425	1.23135	0.327293	-2.9623	0.127679
OG0001794	-0.284536	0.712796	5.02298	0.0330156	5.30751	0.0272448
OG0001798	-4.53501	0.00353325	-6.92906	0.000425572	-2.39405	0.00737969
OG0001799	5.45251	0.00146934	3.97616	0.0137894	-1.47635	0.336054
OG0001801	-2.43422	0.240777	2.18398	0.494304	4.61821	0.129063
OG0001802	0.460962	0.181802	1.58182	0.0109305	1.12086	0.0468568
OG0001803	-8.60821	9.07592e-05	-5.7496	0.00220506	2.85861	0.00889312
OG0001804	-3.42742	0.00863282	-5.31082	0.00110456	-1.8834	0.0145831
OG0001805	1.26245	0.531583	1.38592	0.564126	0.123463	0.963907
OG0001806	5.719	0.00134694	0.449744	0.690134	-5.26926	0.00431434
OG0001808	3.51375	0.0723646	-2.32571	0.0540654	-5.83946	0.00897244
OG0001809	-7.80727	0.00349423	-5.22408	0.0403346	2.58319	0.0618111
OG0001810	-5.68583	0.000177271	0.764291	0.580473	6.45012	0.000889477
OG0001811	-5.36083	2.44304e-05	-3.36015	0.000336581	2.00069	0.000143561
OG0001812	0.509796	0.521688	-2.98227	0.00332693	-3.49207	0.00183246
OG0001813	-2.23614	0.00128985	2.00924	0.0550062	4.24537	0.00183246
OG0001815	-3.9273	0.00194684	-3.09327	0.0109985	0.83403	0.166869
OG0001817	7.09825	0.00267966	0.0493342	0.936445	-7.04892	0.00396818
OG0001819	3.43606	0.176205	-1.92338	0.266839	-5.35944	0.0429049
OG0001820	-1.09758	0.505449	-9.25602	0.000246763	-8.15845	0.000415382
OG0001821	4.464	7.41667e-05	2.22387	0.000529136	-2.24014	0.00519184
OG0001822	-5.30254	0.000110029	-2.14161	0.0239599	3.16094	0.000581178
OG0001823	8.66511	0.00703923	6.06313	0.0349858	-2.60199	0.467107
OG0001824	3.2773	0.0932805	-1.43451	0.232447	-4.7118	0.0264326
OG0001825	5.61923	0.0346764	4.11047	0.136096	-1.50876	0.670097
OG0001826	3.11629	0.00542022	-2.30248	0.00158067	-5.41877	0.000389534
OG0001827	10.1581	0.000112637	-0.614651	0.050977	-10.7727	0.000136467
OG0001828	-1.2554	0.287524	0.359578	0.817542	1.61498	0.26053
OG0001829	10.0818	2.18896e-05	-0.563418	0.0519146	-10.6452	3.9679e-05
OG0001831	-2.67474	0.00794994	-5.81292	0.000157798	-3.13817	0.00080567
OG0001832	2.22404	0.0933563	-6.1774	0.000343342	-8.40144	0.000147346
OG0001833	-1.20402	0.0114033	2.10356	0.0194417	3.30759	0.00230784
OG0001834	3.51875	0.256786	0.40838	0.901695	-3.11037	0.386143
OG0001835	-6.06012	0.00983298	-2.81341	0.264314	3.24671	0.0966589
OG0001836	-3.80099	0.000876348	-0.586149	0.551178	3.21484	0.00478852
OG0001837	-4.06878	0.0551639	-1.12509	0.662748	2.94369	0.189492
OG0001838	2.50435	0.00686064	3.38284	0.0055172	0.878495	0.384294
OG0001839	2.00745	0.268062	-7.567	0.000780296	-9.57445	0.000325633
OG0001841	-1.97616	0.628971	-7.38521	0.0493633	-5.40905	0.0702501
OG0001842	-8.36438	7.38372e-05	-3.98058	0.0120205	4.3838	0.00202378
OG0001843	4.40674	0.0420687	-0.673953	0.477522	-5.0807	0.0300313
OG0001844	-1.30764	0.150099	0.24717	0.829447	1.55482	0.153236
OG0001845	0.0383726	0.904773	3.59709	0.00175567	3.55871	0.00194251
OG0001846	-1.14263	0.546508	-1.0774	0.640448	0.06523	0.976209
OG0001847	4.24151	0.000104769	3.61539	0.000540723	-0.626112	0.413206
OG0001848	-0.613959	0.0411312	-1.16026	0.00422224	-0.546305	0.0632839
OG0001849	5.62028	0.00235107	-2.54181	0.00780206	-8.16209	0.000354399
OG0001850	-4.40733	0.00347888	-0.86394	0.573364	3.54339	0.0188473
OG0001851	6.2367	0.000100749	1.0207	0.057764	-5.21599	0.000510308
OG0001852	-2.34171	0.0189386	4.45592	0.0562129	6.79763	0.00920462
OG0001853	-4.9774	0.000156505	-1.29329	0.135069	3.6841	0.00038027
OG0001854	-0.754432	0.555291	-2.13585	0.103442	-1.38141	0.213781
OG0001855	2.4736	0.240858	6.85705	0.0480844	4.38345	0.207574
OG0001856	0.925375	0.172099	-0.0524722	0.94263	-0.977847	0.201392
OG0001857	-5.76405	0.00132788	-8.75589	0.000183834	-2.99184	0.00216963
OG0001858	5.19556	0.027545	-1.00829	0.22844	-6.20385	0.01661
OG0001859	6.02198	0.000612001	-3.78144	0.000668788	-9.80342	6.09831e-05
OG0001860	-1.98584	0.000220751	-1.17013	0.00738054	0.815708	0.0167742
OG0001861	1.93843	0.000332746	3.56014	0.000507769	1.62171	0.0240867
OG0001862	-2.57588	0.0502632	1.20145	0.462205	3.77733	0.0313353
OG0001863	-4.49305	2.4823e-05	-5.02525	4.82403e-05	-0.532204	0.050515
OG0001864	7.23509	0.00171142	3.85203	0.0271093	-3.38307	0.125294
OG0001865	5.84693	0.00207555	2.38836	0.0541324	-3.45857	0.0571248
OG0001867	-0.633975	0.787605	-3.69063	0.114378	-3.05665	0.171751
OG0001868	-1.69573	0.00094548	1.30601	0.0253093	3.00174	0.000449052
OG0001870	0.625099	0.212387	1.49101	0.0516829	0.865913	0.237631
OG0001871	-3.33607	0.0009113	-4.16179	0.000458998	-0.82571	0.0303514
OG0001872	2.90483	0.0975882	-1.78451	0.234057	-4.68933	0.0207696
OG0001873	0.900496	0.206172	-5.10694	7.39858e-05	-6.00744	5.79914e-05
OG0001874	1.19081	0.686133	3.82861	0.350598	2.6378	0.539691
OG0001875	0.920797	0.00567118	0.264318	0.334612	-0.656479	0.0467757
OG0001876	-11.8153	5.21489e-05	-12.1166	8.86483e-05	-0.301298	0.295436
OG0001877	-1.88343	0.00111253	1.87276	0.0268686	3.75619	0.000961887
OG0001878	-2.14353	0.0708073	-3.56089	0.0132094	-1.41737	0.19212
OG0001879	3.78881	0.000452705	7.89146	0.000657516	4.10264	0.0197095
OG0001880	-2.9644	0.0911208	-3.5229	0.0648101	-0.558502	0.69161
OG0001881	5.98958	0.00537401	-1.21544	0.145268	-7.20502	0.00276256
OG0001882	0.503302	0.513444	6.14848	0.00500113	5.64518	0.00814095
OG0001883	-4.41446	0.0233212	-3.23845	0.104519	1.17601	0.288837
OG0001884	6.15579	0.0201346	4.64091	0.0816869	-1.51488	0.64193
OG0001885	1.05591	0.253447	-0.137111	0.895645	-1.19303	0.253789
OG0001886	0.128992	0.804343	2.83163	0.0276119	2.70264	0.0346354
OG0001887	-3.14566	0.00984765	-1.77187	0.149811	1.37379	0.127528
OG0001888	3.82161	0.0250307	0.0498227	0.973486	-3.77179	0.0423626
OG0001889	-0.530767	0.274639	-3.98664	0.000101583	-3.45587	7.61336e-05
OG0001890	-3.69579	0.152116	-9.63814	0.00201707	-5.94235	0.00785674
OG0001891	-1.76339	0.0623985	4.4386	0.0265405	6.202	0.00496366
OG0001892	-0.0722394	0.793487	2.45157	0.00229092	2.52381	0.00205142
OG0001893	1.27132	0.00210556	6.60472	0.000468951	5.3334	0.0014057
OG0001894	2.19797	0.00989334	3.11045	0.0139737	0.912484	0.435356
OG0001896	3.2765	0.0231044	-1.10119	0.327695	-4.37768	0.00920832
OG0001897	-6.29195	0.00373207	-3.17872	0.141007	3.11323	0.0624325
OG0001898	-1.21478	0.622301	-2.43066	0.356703	-1.21588	0.633132
OG0001899	0.690862	0.293183	0.351965	0.634262	-0.338897	0.669417
OG0001900	6.87306	0.00152482	10.5621	0.00181555	3.68904	0.178069
OG0001901	-0.238574	0.886184	-4.76515	0.0115686	-4.52658	0.0152749
OG0001902	-3.38415	0.000165649	1.22271	0.152835	4.60686	0.000538742
OG0001903	0.872593	0.00203318	-1.34469	0.000238941	-2.21729	4.89397e-05
OG0001904	-4.081	0.000231184	-2.89732	0.00241323	1.18367	0.0126097
OG0001905	1.70648	0.230088	2.02618	0.232982	0.319699	0.866708
OG0001906	1.92029	0.00110427	-0.406616	0.23433	-2.3269	0.000782706
OG0001907	-1.95916	0.117084	1.98126	0.282959	3.94042	0.0384425
OG0001908	-1.92661	0.0409682	-1.04345	0.31342	0.883167	0.293009
OG0001909	0.735962	0.0405785	-0.170881	0.621463	-0.906843	0.0299518
OG0001910	2.79655	0.00447566	-3.99493	7.85712e-05	-6.79148	6.82515e-05
OG0001911	2.48226	0.135569	4.86986	0.0771568	2.3876	0.407184
OG0001912	-2.79488	0.00363013	-1.55306	0.0800314	1.24183	0.0592866
OG0001913	6.87126	0.000434918	-2.16775	0.0104582	-9.039	0.000133506
OG0001914	-0.730042	0.394964	-4.41843	0.000622814	-3.68839	0.000511847
OG0001915	-3.37454	0.0526954	0.54718	0.818682	3.92172	0.0701996
OG0001916	-1.40302	0.0277139	-0.852648	0.211019	0.550371	0.348738
OG0001917	-1.58693	0.00736416	2.7044	0.0283907	4.29133	0.00340918
OG0001918	-0.862499	0.74147	3.10823	0.433548	3.97073	0.308336
OG0001919	-1.11432	0.00499319	0.855311	0.0788827	1.96964	0.0021177
OG0001920	1.11409	0.644731	-6.56118	0.00617637	-7.67527	0.00414483
OG0001921	-6.43882	0.000115759	0.0321191	0.978903	6.47094	0.000362037
OG0001922	1.11298	0.434603	-7.51006	0.00026716	-8.62303	0.000188353
OG0001923	1.50864	0.00256002	1.73132	0.0049732	0.222679	0.664943
OG0001924	4.34499	0.0292698	4.53189	0.0611933	0.186903	0.950157
OG0001925	-1.53657	0.405794	-5.59504	0.0110809	-4.05847	0.0383803
OG0001926	-1.61244	0.0075145	-0.0365481	0.958369	1.57589	0.0201833
OG0001927	-2.72911	0.00105187	-2.78066	0.00162638	-0.0515563	0.897623
OG0001928	5.87501	0.105819	-2.12764	0.379364	-8.00265	0.0356626
OG0001929	2.30896	0.24023	-3.68963	0.0379337	-5.99859	0.00890541
OG0001930	2.04621	5.0271e-05	13.5708	8.01284e-05	11.5246	0.000136467
OG0001931	3.65403	0.058285	-1.39936	0.187558	-5.05339	0.0179552
OG0001932	-0.382025	0.735722	-3.02036	0.0125103	-2.63834	0.017927
OG0001933	7.33964	9.17954e-05	-2.12656	0.00210094	-9.46621	4.86224e-05
OG0001935	4.48783	0.0374431	-3.57253	0.0131176	-8.06036	0.00208555
OG0001936	-2.93598	0.00344745	-0.947349	0.317496	1.98863	0.0197358
OG0001937	0.972272	0.0016976	3.35476	0.000206271	2.38249	0.00107638
OG0001938	2.30822	0.409552	1.16069	0.715024	-1.14753	0.742243
OG0001939	-4.46181	0.000939108	-0.328181	0.793982	4.13363	0.00384191
OG0001940	-2.56922	0.00345139	-2.12338	0.0145646	0.445835	0.345176
OG0001941	5.7518	0.00752334	0.648497	0.60792	-5.10331	0.0228524
OG0001942	0.458877	0.251644	4.28837	0.00331379	3.82949	0.00609941
OG0001943	5.35231	7.71199e-05	1.02796	0.00758347	-4.32434	0.00036976
OG0001944	7.24514	0.00217522	-0.765108	0.235636	-8.01025	0.00184769
OG0001945	-0.414584	0.359469	-3.5554	0.000109284	-3.14082	8.72743e-05
OG0001946	-3.22747	0.00706242	-6.53113	0.000232593	-3.30366	0.000432267
OG0001947	-2.07733	0.0910932	2.27454	0.186145	4.35187	0.0211318
OG0001948	-0.843259	0.266983	-3.79202	0.000835797	-2.94876	0.000934944
OG0001949	-1.95708	8.58298e-05	-1.71577	0.00037052	0.241313	0.264389
OG0001950	1.83583	2.33058e-05	0.703477	0.00254377	-1.13235	0.000444595
OG0001951	-0.213841	0.915981	-5.13555	0.00933388	-4.92171	0.0100465
OG0001952	2.162	0.000792101	-1.01443	0.00693354	-3.17642	0.000184606
OG0001953	1.68632	0.314992	-7.28487	0.000754053	-8.97118	0.000325491
OG0001954	-8.7579	0.000282908	-8.7041	0.000484512	0.053795	0.934652
OG0001955	-6.34793	0.00231892	-5.4637	0.00853046	0.884238	0.340543
OG0001956	4.38673	0.0127842	3.5094	0.0554866	-0.877328	0.670635
OG0001957	3.90546	0.0691256	5.35637	0.0695783	1.4509	0.656922
OG0001958	-2.22598	0.0484012	-3.18246	0.0155566	-0.956482	0.320795
OG0001959	-4.48141	0.0154264	-5.16501	0.0102687	-0.683598	0.394872
OG0001960	8.09569	0.000204794	-1.56002	0.0159387	-9.65571	0.000128853
OG0001961	-0.172799	0.437658	-0.955944	0.00423373	-0.783145	0.00968051
OG0001962	5.93178	0.00251593	-3.89413	0.000608006	-9.82592	0.000223794
OG0001963	1.3022	0.00585415	3.20635	0.00207653	1.90416	0.0261697
OG0001964	-5.52236	0.00568769	-3.24384	0.0895193	2.27852	0.0532203
OG0001965	-6.37474	0.00529633	-5.54693	0.0134803	0.827814	0.24886
OG0001966	2.53975	0.169858	-5.22969	0.00264503	-7.76944	0.0012733
OG0001967	-3.85095	0.0910374	-7.90822	0.00340116	-4.05727	0.0141161
OG0001968	-2.66445	4.22624e-05	-2.57288	0.000111487	0.0915733	0.663842
OG0001969	-4.06367	0.0213285	-6.25303	0.00271393	-2.18936	0.0625946
OG0001970	0.554118	0.665261	-2.59943	0.0288673	-3.15354	0.0177291
OG0001971	-4.22564	0.42776	-1.15095	0.878128	3.07469	0.604002
OG0001973	-0.266262	0.54028	7.32257	0.00314011	7.58883	0.00283351
OG0001974	-1.28728	0.00255672	-0.162623	0.668531	1.12466	0.010661
OG0001975	0.756827	0.244793	-1.20972	0.0522035	-1.96655	0.0115529
OG0001976	0.703581	0.195359	-2.45251	0.000684557	-3.15609	0.000343919
OG0001978	-1.74839	0.188526	-8.60541	0.000151007	-6.85702	0.00031015
OG0001981	4.62526	0.013077	-1.19138	0.23001	-5.81663	0.0053583
OG0001982	3.52174	0.00112382	2.97561	0.00610522	-0.546128	0.594833
OG0001983	2.57316	0.00269345	-0.753909	0.0771969	-3.32706	0.00110403
OG0001984	6.4261	9.07592e-05	3.22244	0.00155754	-3.20366	0.0100391
OG0001985	-4.13227	0.00731729	-0.292605	0.861035	3.83967	0.022128
OG0001986	12.0268	1.70644e-05	3.2962	7.85712e-05	-8.73062	6.27217e-05
OG0001987	-2.8379	0.000299409	-1.10128	0.0628987	1.73662	0.00283351
OG0001988	1.80236	0.396209	-1.68657	0.415315	-3.48893	0.135344
OG0001989	6.15377	0.00846145	0.280487	0.708272	-5.87328	0.0142967
OG0001990	9.43653	0.00134311	5.93444	0.0159731	-3.50209	0.2159
OG0001991	-4.54585	0.00615362	-7.86145	0.000347263	-3.3156	0.0044195
OG0001992	-2.50959	0.287405	-0.361167	0.913275	2.14842	0.440344
OG0001993	-2.22253	0.000648941	-0.473854	0.350329	1.74867	0.00347118
OG0001994	-2.5458	0.0458392	3.08965	0.302108	5.63545	0.0704295
OG0001995	2.83963	0.109845	-1.3716	0.279411	-4.21123	0.0283921
OG0001996	-4.97653	0.016577	-4.2679	0.0412249	0.708628	0.408374
OG0001997	-2.53829	0.0011969	-2.68456	0.00154855	-0.146278	0.703435
OG0001999	-2.96012	0.10057	-5.29119	0.0103513	-2.33107	0.0438014
OG0002000	0.100963	0.982218	-7.10577	0.0421387	-7.20674	0.0396429
OG0002001	-2.29996	0.00216429	-2.40382	0.00294467	-0.103859	0.810533
OG0002002	4.22652	0.028058	-4.68366	0.00222702	-8.91017	0.000579237
OG0002003	-5.16618	0.000166967	0.22776	0.849987	5.39394	0.000796817
OG0002004	1.28799	0.0164596	0.659707	0.17993	-0.628281	0.262147
OG0002005	-2.60813	0.0419776	0.385517	0.806779	2.99365	0.0534482
OG0002006	-4.07	3.48921e-05	-2.46649	0.000681338	1.60351	0.000462002
OG0002008	1.42782	0.329721	-2.53702	0.0706676	-3.96484	0.0182172
OG0002009	-0.139676	0.938988	-6.38061	0.00242722	-6.24094	0.00278978
OG0002010	-0.64418	0.116206	1.24138	0.0754292	1.88556	0.0139928
OG0002012	-4.36187	0.000265653	-2.25134	0.0162824	2.11053	0.00286378
OG0002013	4.71361	0.0218089	-1.4263	0.25175	-6.1399	0.00702966
OG0002014	-0.0696655	0.740896	0.101233	0.690219	0.170899	0.487158
OG0002015	2.19056	0.0834713	2.55339	0.0949365	0.362827	0.827397
OG0002016	-3.65591	0.12372	-5.74899	0.0319571	-2.09308	0.321388
OG0002017	3.76724	0.0855692	-3.69225	0.0450522	-7.4595	0.00454602
OG0002019	5.21026	0.0766271	-1.22236	0.610107	-6.43262	0.0453744
OG0002020	-0.354443	0.448496	-2.45465	0.000734001	-2.10021	0.000909431
OG0002021	4.1579	0.000646779	2.85652	0.00743629	-1.30138	0.195345
OG0002022	0.0357792	0.97879	2.09136	0.206639	2.05558	0.216657
OG0002024	-0.41696	0.724052	4.25228	0.0762987	4.66924	0.0533198
OG0002025	-1.13249	0.662719	-7.05817	0.00798818	-5.92568	0.0110234
OG0002026	1.19275	0.551049	-0.493384	0.819752	-1.68614	0.446315
OG0002027	4.51419	0.0168378	4.09669	0.0491468	-0.417504	0.858372
OG0002029	2.6669	0.000462973	5.80626	0.00139576	3.13936	0.026594
OG0002030	3.5506	0.11398	3.24022	0.21608	-0.310379	0.924074
OG0002031	8.15432	0.000518673	7.21876	0.00236553	-0.935561	0.663059
OG0002032	-1.567	0.00428944	-0.54448	0.28375	1.02252	0.0368057
OG0002033	-1.11069	0.330196	-2.1671	0.0823022	-1.05641	0.255518
OG0002034	-5.66712	0.00375522	0.379482	0.878128	6.0466	0.0115235
OG0002035	3.202	0.00113958	3.64111	0.00414441	0.439117	0.68366
OG0002037	-0.433885	0.343781	6.98504	0.00916918	7.41892	0.00738282
OG0002038	6.65624	0.00617851	2.75492	0.101506	-3.90132	0.118741
OG0002039	5.48841	0.11398	-2.3715	0.318533	-7.85991	0.0306733
OG0002040	-5.33295	0.0152232	-6.14542	0.0100693	-0.812478	0.246077
OG0002041	7.59159	0.000524146	1.27621	0.144165	-6.31538	0.00297121
OG0002042	0.180285	0.605371	-1.83861	0.000746101	-2.0189	0.00047479
OG0002043	-0.68754	0.366443	-5.27895	0.000177488	-4.59141	0.000107783
OG0002044	-0.350266	0.390207	0.602627	0.282959	0.952893	0.0952677
OG0002046	6.73403	0.000659124	2.39852	0.0279027	-4.3355	0.0161533
OG0002047	-11.6419	0.00478944	-3.06645	0.415299	8.57541	0.00389824
OG0002048	4.59276	0.0268093	2.0511	0.272322	-2.54167	0.266342
OG0002049	-3.9111	0.126665	1.12559	0.787885	5.03669	0.154333
OG0002050	3.40209	0.254722	-4.72671	0.0569647	-8.1288	0.01155
OG0002051	-0.378446	0.785934	2.567	0.208984	2.94544	0.150745
OG0002052	4.0595	0.120141	1.09054	0.6922	-2.96895	0.320197
OG0002053	6.55198	0.000117817	0.632871	0.381046	-5.91911	0.000450959
OG0002054	-4.33143	0.0180492	-5.97732	0.00482784	-1.6459	0.0454701
OG0002055	1.11984	0.499529	-5.09588	0.00505282	-6.21571	0.00273531
OG0002057	7.39976	0.00113858	4.02549	0.0271894	-3.37428	0.108389
OG0002058	5.72988	8.93784e-05	2.89665	0.000518006	-2.83323	0.00715577
OG0002060	-1.48736	0.459341	-5.61926	0.0126404	-4.1319	0.0312514
OG0002061	-0.415745	0.890563	-4.10545	0.104236	-3.68971	0.113094
OG0002062	-4.38947	0.0288376	4.93701	0.154318	9.32647	0.0123847
OG0002063	5.23513	0.000612824	-1.14022	0.137426	-6.37535	0.000342135
OG0002064	4.09005	0.000487527	-1.73552	0.00334099	-5.82557	0.00010818
OG0002065	-3.55115	0.0822174	-4.52174	0.0417767	-0.970595	0.539962
OG0002066	5.00466	5.37548e-05	1.83719	0.000823435	-3.16747	0.00108247
OG0002067	-1.49334	0.525183	-4.5117	0.0593668	-3.01836	0.0635577
OG0002068	4.62262	0.0221117	-2.93402	0.03227	-7.55664	0.00191464
OG0002069	5.50722	0.000910174	1.3247	0.215176	-4.18253	0.00884066
OG0002070	8.99169	6.9346e-05	-0.567167	0.0761956	-9.55886	8.6046e-05
OG0002071	-6.6906	0.0022412	-1.75494	0.416048	4.93567	0.0150461
OG0002072	6.69666	0.00326132	-0.459602	0.555722	-7.15627	0.00331017
OG0002073	6.57603	0.000139899	-0.664302	0.302627	-7.24033	0.000150716
OG0002074	-4.71871	0.00231892	-7.20738	0.000320083	-2.48867	0.0157209
OG0002075	4.99605	0.00880231	2.86892	0.101083	-2.12713	0.276241
OG0002077	-1.41997	0.427666	-1.49032	0.46233	-0.0703521	0.973319
OG0002078	-1.91784	0.0537908	-2.10197	0.0582244	-0.184124	0.849486
OG0002079	-3.19958	0.000565567	0.227181	0.791227	3.42676	0.00165854
OG0002080	-6.81693	0.000605072	-8.48633	0.000298241	-1.6694	0.00578838
OG0002082	2.30708	0.00113462	3.02382	0.00293692	0.716741	0.37031
OG0002083	0.0463135	0.992459	-1.52978	0.747429	-1.57609	0.741436
OG0002084	4.1662	0.0670416	4.86488	0.093094	0.698687	0.840023
OG0002085	6.46817	0.000384975	-0.707141	0.0601631	-7.17532	0.000354273
OG0002086	0.279892	0.396234	0.470693	0.25371	0.190801	0.652062
OG0002087	-2.06807	0.00264507	-2.35459	0.00224167	-0.286528	0.424849
OG0002088	-1.15272	0.223714	-2.35786	0.0285487	-1.20515	0.165328
OG0002089	-7.99657	0.000722267	-7.59409	0.00171947	0.402478	0.65777
OG0002090	-7.4248	4.65704e-05	-8.24696	6.60852e-05	-0.822155	0.00464254
OG0002091	8.47335	0.00010197	-1.54499	0.00739013	-10.0183	7.27339e-05
OG0002092	4.99209	0.00260287	-2.83266	0.00992454	-7.82475	0.000262745
OG0002093	-5.41294	0.00845236	-6.69109	0.00358128	-1.27815	0.188641
OG0002094	0.698478	0.321452	2.43847	0.028995	1.73999	0.101836
OG0002095	6.40323	0.00321821	-1.8751	0.0205275	-8.27833	0.00113431
OG0002096	2.652	0.0010643	1.39435	0.0157232	-1.25765	0.0682362
OG0002097	0.840881	0.326051	2.07364	0.0813543	1.23276	0.292704
OG0002098	-0.245229	0.278862	2.23185	0.00064878	2.47708	0.000385402
OG0002100	-2.05761	0.079636	-2.52788	0.0514513	-0.470272	0.605334
OG0002101	0.476578	0.321638	2.81574	0.0178928	2.33916	0.0395751
OG0002102	-5.04865	1.70644e-05	7.46373	0.000157608	12.5124	3.54463e-05
OG0002103	2.06803	0.424253	-1.55544	0.529346	-3.62347	0.190543
OG0002104	-2.43128	0.275745	-2.37378	0.347367	0.0575007	0.982827
OG0002105	0.80778	0.800643	-0.165658	0.964039	-0.973438	0.793415
OG0002106	3.62488	0.0240348	2.56309	0.115004	-1.06179	0.557655
OG0002107	-0.24009	0.522585	-0.77842	0.074844	-0.538331	0.172107
OG0002108	5.4016	0.014773	-2.64565	0.0150362	-8.04726	0.00242693
OG0002109	-1.45943	0.495009	-2.44067	0.293928	-0.981241	0.659932
OG0002110	1.8549	0.00136305	1.16931	0.017806	-0.685598	0.173536
OG0002111	-7.55453	0.000100336	0.0321191	0.981891	7.58665	0.000335311
OG0002112	2.75677	0.000165295	1.65369	0.00206351	-1.10307	0.0369542
OG0002113	-1.25452	0.131651	-1.33952	0.148763	-0.0849965	0.919794
OG0002114	-0.64304	0.228092	-0.923392	0.127242	-0.280352	0.594812
OG0002115	4.11171	0.0420275	5.85327	0.0258854	1.74156	0.497148
OG0002116	0.64492	0.397312	-0.249231	0.756773	-0.894151	0.289716
OG0002117	10.0016	3.2199e-05	-0.875494	0.0139596	-10.8771	4.4939e-05
OG0002118	-9.01601	0.00114477	-0.49568	0.864308	8.52033	0.00414191
OG0002119	-1.05118	0.645745	-1.94751	0.431954	-0.896326	0.714804
OG0002120	-2.63095	0.000712845	-1.28918	0.0449561	1.34176	0.0115235
OG0002121	-6.2246	0.0663272	-5.60419	0.139403	0.620416	0.839471
OG0002122	1.70479	0.47136	1.77016	0.527788	0.0653757	0.983902
OG0002123	-0.182594	0.786222	5.06933	0.00760953	5.25193	0.00648695
OG0002124	-1.75155	0.000372412	-0.771126	0.0421387	0.980427	0.0084395
OG0002125	-5.19216	0.0065438	-2.45354	0.195898	2.73861	0.0498458
OG0002126	0.369922	0.617196	-3.77641	0.000402549	-4.14633	0.000292208
OG0002127	8.66958	0.00025303	6.01482	0.00201404	-2.65475	0.158765
OG0002128	-8.69243	0.000226965	-7.91806	0.000540723	0.774373	0.0461263
OG0002129	-3.65181	0.0703607	-5.24146	0.0192486	-1.58966	0.1302
OG0002130	-3.1383	0.0022373	-2.84331	0.00577198	0.294987	0.511757
OG0002131	-0.407969	0.341724	0.656551	0.276021	1.06452	0.0830422
OG0002132	-6.23223	0.000264972	-4.25727	0.0052615	1.97496	0.0278638
OG0002134	-3.33438	0.0118763	-2.28134	0.0896854	1.05304	0.224759
OG0002135	2.33544	0.198741	5.58258	0.0879887	3.24714	0.340559
OG0002136	-0.168725	0.753135	5.16995	0.00362693	5.33868	0.00317808
OG0002137	11.6885	0.000113207	1.91459	0.00406778	-9.77396	0.000441221
OG0002138	3.97097	0.000820065	5.7228	0.00117264	1.75184	0.187415
OG0002139	-5.45989	0.0205234	-8.51036	0.00279985	-3.05047	0.0073189
OG0002140	-1.79722	0.0162028	5.47516	0.0567267	7.27238	0.020251
OG0002141	-1.05669	0.210056	4.65778	0.00531357	5.71447	0.0018318
OG0002142	1.97133	0.0018255	0.176255	0.637057	-1.79508	0.00543777
OG0002143	-4.50792	0.290316	-6.70063	0.117996	-2.19271	0.43373
OG0002144	1.09729	0.004714	2.39505	0.00101072	1.29776	0.020167
OG0002145	0.140189	0.886255	-3.02563	0.00444545	-3.16582	0.00369579
OG0002146	5.01639	0.0199424	1.62766	0.359287	-3.38873	0.14452
OG0002151	2.125	0.0635396	-2.03123	0.0648537	-4.15623	0.00527211
OG0002153	-1.47211	0.00323392	1.56105	0.0401411	3.03316	0.00188941
OG0002154	1.30328	0.478364	-0.949271	0.609119	-2.25256	0.255518
OG0002155	-3.76371	0.00765624	-3.484	0.0186471	0.27971	0.747527
OG0002157	9.61955	1.98273e-05	11.6431	5.59485e-05	2.02353	0.124944
OG0002158	5.20178	0.00133942	0.799435	0.435041	-4.40235	0.00680652
OG0002159	1.03117	0.0247128	-0.412738	0.306388	-1.44391	0.00954798
OG0002160	2.44824	0.228183	-3.89132	0.011009	-6.33956	0.00737566
OG0002161	-5.89525	0.0114497	-4.81897	0.0394303	1.07628	0.324785
OG0002162	0.68197	0.687603	1.48284	0.47015	0.800868	0.710663
OG0002163	1.29255	0.00236953	-0.563247	0.0586994	-1.8558	0.000657338
OG0002165	-6.86347	0.00326132	-5.04854	0.0248452	1.81493	0.10898
OG0002166	0.35307	0.504841	-3.22223	0.000251094	-3.5753	0.000180209
OG0002167	-0.555434	0.690947	0.839914	0.62939	1.39535	0.411401
OG0002168	2.72188	0.0028417	0.708066	0.191275	-2.01381	0.0229478
OG0002169	-3.20651	0.000119445	0.0565128	0.928611	3.26302	0.000338438
OG0002170	-6.36405	0.00127484	-5.71037	0.00475352	0.65368	0.57279
OG0002171	-0.103794	0.828452	0.519891	0.394777	0.623685	0.299247
OG0002172	-4.72774	5.85451e-05	-3.43884	0.000481872	1.28891	0.00213889
OG0002173	0.085358	0.928988	-1.00068	0.271285	-1.08604	0.236655
OG0002174	0.899501	0.0101089	-1.31062	0.00126605	-2.21012	0.000180876
OG0002176	0.73829	0.00740177	2.12398	0.000399699	1.38569	0.00338077
OG0002177	-1.73687	0.0217779	0.159023	0.871012	1.89589	0.038194
OG0002178	2.24585	0.0126127	-0.0814564	0.907166	-2.32731	0.0175199
OG0002181	-5.06759	0.00123101	-5.08486	0.00179014	-0.0172641	0.973319
OG0002182	1.02713	0.348842	-4.42924	0.00299235	-5.45637	0.00120765
OG0002183	-0.438418	0.30752	-1.19074	0.0229061	-0.752321	0.0812964
OG0002184	4.21022	6.4644e-05	-0.929852	0.00375742	-5.14007	5.2367e-05
OG0002185	0.66062	0.604324	-9.5741	7.72345e-05	-10.2347	5.53078e-05
OG0002186	-3.49546	0.0803939	-5.92148	0.00853458	-2.42602	0.0847517
OG0002187	-1.38214	0.239411	-5.40451	0.0013887	-4.02237	0.00414874
OG0002188	-2.73644	0.014168	-5.383	0.000508802	-2.64656	0.001945
OG0002189	-3.76945	0.0173479	0.516555	0.793733	4.286	0.0267693
OG0002190	-3.30856	0.00301561	-1.29858	0.219172	2.00997	0.0290166
OG0002191	-1.46304	0.0363783	-1.41393	0.0637756	0.0491098	0.937379
OG0002192	2.32302	0.225788	2.651	0.252137	0.327981	0.904396
OG0002193	-4.84649	0.034252	-2.68461	0.303767	2.16188	0.292678
OG0002194	2.31139	0.0212834	-0.284152	0.72355	-2.59554	0.0203142
OG0002195	7.24271	0.00024613	4.37177	0.00078009	-2.87093	0.0484495
OG0002196	4.4965	0.0209528	5.75064	0.0267899	1.25414	0.642913
OG0002197	-11.9576	3.53843e-05	-3.7363	0.0375111	8.22127	0.000259187
OG0002198	0.351045	0.309553	1.64839	0.0127085	1.29734	0.0359771
OG0002199	0.505041	0.628971	6.5715	0.0120305	6.06646	0.0185788
OG0002200	5.93426	0.0008103	-0.834832	0.350465	-6.76909	0.000643863
OG0002201	5.61402	0.000549861	3.3739	0.00949703	-2.24012	0.0920531
OG0002202	2.45889	0.186811	3.78163	0.127479	1.32274	0.620468
OG0002203	-8.92284	0.000298936	-9.14072	0.000408991	-0.217879	0.584456
OG0002205	-0.0601136	0.942533	-1.23163	0.151397	-1.17152	0.171585
OG0002206	2.34987	0.180681	-1.79637	0.284355	-4.14624	0.041415
OG0002207	7.22314	0.000566064	2.43782	0.0112004	-4.78532	0.00938208
OG0002208	-3.10707	0.00933216	1.41124	0.417035	4.51831	0.0161467
OG0002209	-0.818977	0.0790083	-2.95215	0.000305614	-2.13318	0.000530739
OG0002210	7.71209	0.000153404	-0.784544	0.11574	-8.49664	0.000151361
OG0002211	0.0844751	0.922047	-1.42668	0.116263	-1.51116	0.101836
OG0002212	0.538885	0.0391001	1.00704	0.00921443	0.468153	0.149832
OG0002213	3.7551	0.00339659	1.70904	0.0765319	-2.04606	0.105009
OG0002214	-1.08421	0.693622	-0.829751	0.801113	0.254458	0.938273
OG0002215	8.88728	7.913e-05	6.75804	0.000767355	-2.12924	0.177498
OG0002216	2.2559	0.00117607	1.99049	0.00508568	-0.265406	0.658159
OG0002217	-9.49575	6.00431e-05	-10.4179	7.85712e-05	-0.922192	0.0212536
OG0002218	-0.373164	0.427517	6.3218	0.00813897	6.69496	0.00656182
OG0002219	-1.0081	0.0353325	-0.0284292	0.96209	0.979671	0.0715978
OG0002220	3.89451	0.0574207	-1.41969	0.170117	-5.3142	0.0192704
OG0002221	4.6023	0.00985915	-1.15787	0.167537	-5.76017	0.00414578
OG0002222	0.590003	0.660593	-4.52391	0.00654856	-5.11391	0.00403553
OG0002223	0.803103	0.311812	0.688808	0.449	-0.114294	0.912933
OG0002224	3.02767	0.0564672	-0.745248	0.600117	-3.77292	0.0366449
OG0002225	-2.64116	0.00237241	-2.37323	0.0069239	0.267933	0.578751
OG0002226	5.55361	0.00713269	1.66297	0.114638	-3.89064	0.0545159
OG0002227	-0.693617	0.0768335	0.709303	0.192435	1.40292	0.0199405
OG0002228	-7.37819	0.00185036	-4.22954	0.0345277	3.14865	0.00318433
OG0002229	0.354038	0.28639	-0.804094	0.0324242	-1.15813	0.00817642
OG0002230	-5.73702	0.0101183	-10.1616	0.000684557	-4.42456	0.000523038
OG0002231	-2.80929	0.00259331	-1.52269	0.0823867	1.2866	0.0842007
OG0002233	2.68362	0.00701839	-1.20427	0.0293211	-3.8879	0.00144838
OG0002234	-4.06108	0.000860289	-2.59532	0.0172802	1.46576	0.0320975
OG0002236	-1.15062	0.116021	5.4412	0.0265045	6.59183	0.011719
OG0002237	4.86283	0.0835359	-1.94443	0.374951	-6.80726	0.0274855
OG0002238	-7.0024	0.000143692	-4.98682	0.00196434	2.01558	0.0119848
OG0002239	-3.30431	0.0279148	-2.12036	0.183424	1.18395	0.394614
OG0002240	2.63385	0.00544541	5.25518	0.00191503	2.62133	0.0587782
OG0002241	1.22656	0.203746	-1.55135	0.0539947	-2.77791	0.013009
OG0002242	-1.35155	0.343019	-1.84123	0.247631	-0.48968	0.753167
OG0002243	-3.65662	2.80325e-05	-3.40996	8.14445e-05	0.24666	0.231062
OG0002244	-0.888832	0.587377	-8.63011	0.000344782	-7.74128	0.000484056
OG0002245	-11.1577	0.000104233	-6.22344	0.00576585	4.93424	0.00175677
OG0002246	4.78031	0.000591585	-1.63009	0.0428009	-6.41041	0.000213626
OG0002247	3.76839	0.000287168	5.1771	0.000680335	1.40871	0.184221
OG0002248	-0.243746	0.819274	-8.65367	6.27888e-05	-8.40992	5.12452e-05
OG0002250	-7.93871	0.0019595	-6.30647	0.00834067	1.63224	0.029759
OG0002251	-5.4657	0.000159175	-0.050092	0.967314	5.41561	0.000593294
OG0002252	1.18894	0.313939	-5.28405	0.00139803	-6.47299	0.000554071
OG0002253	-5.59456	0.0356681	-3.12993	0.30444	2.46464	0.302035
OG0002255	2.40447	0.00560379	4.38424	0.00286258	1.97977	0.102724
OG0002256	1.57404	0.000416941	10.1139	0.000136336	8.53987	0.000282358
OG0002257	2.90795	0.0917091	2.9764	0.135577	0.0684519	0.976209
OG0002258	5.20215	0.00347244	0.92494	0.328753	-4.27721	0.0170078
[truncated: 13,814 more rows]
