# Supplementary material for: Species and population specific gene expression in blood transcriptomes of marine turtles
Source: BMC Genomics. 2021 May 13;22:346. doi: 10.1186/s12864-021-07656-5 (PMC8117300; doi:10.1186/s12864-021-07656-5)
Supplement: Supplementary file 8 — Additional file 8: Table S8. Differential gene expression analyses results for comparisons between green turtle foraging aggregations. Log fold change and adjusted p-values are listed for the California and Hawai’i, California and the Commonwealth of the Northern Mariana Islands (CNMI), and Hawai’i and CNMI Islands comparisons. [file 12864_2021_7656_MOESM8_ESM.xlsx]

## Sheet: TableS8
		California v. Hawaii		California v. Mariana Islands		Hawaii v. Mariana Islands
Gene	Sequence Description	logFC	adj.P.Val	logFC	adj.P.Val	logFC	adj.P.Val
TRINITY_DN0_c0_g1	Zinc finger and SCAN domain-containing protein 29	0.0706953	0.65928	-0.24647	0.0760925	-0.317165	0.00405215
TRINITY_DN0_c0_g1	rna-directed dna polymerase from mobile element jockey-like	0.0706953	0.65928	-0.24647	0.0760925	-0.317165	0.00405215
TRINITY_DN0_c0_g2	RH-like protein isoform X1	0.0596729	0.807011	0.0768702	0.748745	0.0171973	0.925663
TRINITY_DN0_c0_g2	protein SSUH2 homolog isoform X2	0.0596729	0.807011	0.0768702	0.748745	0.0171973	0.925663
TRINITY_DN0_c0_g2	SH3 domain-containing kinase-binding protein 1	0.0596729	0.807011	0.0768702	0.748745	0.0171973	0.925663
TRINITY_DN0_c0_g3	protein ANTAGONIST OF LIKE HETEROCHROMATIN PROTEIN 1-like	0.228253	0.740462	-0.516507	0.426953	-0.74476	0.107991
TRINITY_DN0_c0_g4	ganglioside GM2 activator	-0.0752573	0.889239	0.256823	0.561602	0.33208	0.272657
TRINITY_DN0_c0_g5	hypothetical protein UY3_17240	-0.159977	0.653857	-0.304027	0.357287	-0.14405	0.582937
TRINITY_DN0_c0_g6	transmembrane 9 superfamily member 4	-0.125846	0.650104	-0.333632	0.178061	-0.207786	0.28333
TRINITY_DN0_c1_g1	stromal membrane-associated protein 2	0.0833141	0.633607	-0.0143746	0.949097	-0.0976888	0.425857
TRINITY_DN0_c14_g1	---NA---	0.0558114	0.930212	-0.416799	0.420442	-0.47261	0.209493
TRINITY_DN0_c2_g1	endogenous retrovirus group K member 6 Gag polyprotein-like	0.345823	0.277545	0.299069	0.36096	-0.0467544	0.867419
TRINITY_DN0_c20_g1	---NA---	0.307153	0.539207	0.16699	0.768829	-0.140163	0.714306
TRINITY_DN0_c28_g1	protein ALP1-like	0.281584	0.501333	-0.265022	0.551395	-0.546606	0.0687541
TRINITY_DN0_c28_g1	Zinc finger and SCAN domain-containing protein 29	0.281584	0.501333	-0.265022	0.551395	-0.546606	0.0687541
TRINITY_DN0_c28_g1	Protein sprouty like protein 2	0.281584	0.501333	-0.265022	0.551395	-0.546606	0.0687541
TRINITY_DN0_c3_g1	Retrovirus-related Pol poly from transposon	-1.03756	0.00735415	-1.34517	0.00130402	-0.307606	0.376136
TRINITY_DN0_c37_g1	RNA-directed DNA polymerase from mobile element jockey-like	-0.243503	0.526495	-0.713505	0.0478193	-0.470002	0.101806
TRINITY_DN0_c37_g2	---NA---	0.197439	0.868879	-0.399374	0.733109	-0.596813	0.435378
TRINITY_DN0_c4_g1	DNA primase small subunit	-0.10005	0.81645	-0.549103	0.117161	-0.449053	0.0995452
TRINITY_DN0_c44_g1	---NA---	-0.0524018	0.879676	0.378722	0.136974	0.431124	0.0248214
TRINITY_DN0_c6_g1	hematopoietic progenitor cell antigen CD34	0.0643426	0.944792	0.908164	0.136386	0.843821	0.0614881
TRINITY_DN0_c7_g1	---NA---	0.128574	0.80005	-0.396646	0.370698	-0.52522	0.100933
TRINITY_DN0_c8_g1	Zinc finger and SCAN domain-containing protein 29	-0.309751	0.516331	-0.627095	0.184557	-0.317344	0.41996
TRINITY_DN1_c0_g1	SH2 domain-containing protein 4B	-0.0788673	0.923445	0.501338	0.401193	0.580205	0.168435
TRINITY_DN1_c0_g2	hypothetical protein XELAEV_18015991mg	0.0775387	0.663808	-0.125339	0.458843	-0.202878	0.0873035
TRINITY_DN1_c0_g2	CDK5 and ABL1 enzyme substrate 1	0.0775387	0.663808	-0.125339	0.458843	-0.202878	0.0873035
TRINITY_DN1_c0_g3	apoptosis inhibitor 5	-0.279348	0.104015	0.0161963	0.949388	0.295544	0.0266803
TRINITY_DN1_c0_g5	carbonic anhydrase 5A, mitochondrial isoform X2	0.156294	0.523827	0.562483	0.00830274	0.406189	0.0116438
TRINITY_DN1_c1_g1	interleukin-6 receptor subunit beta isoform X1	0.112923	0.815636	0.0488931	0.929352	-0.06403	0.852892
TRINITY_DN1_c127_g1	fibronectin type III and SPRY domain-containing protein 1-like	0.314013	0.53391	-0.348451	0.524331	-0.662465	0.0682921
TRINITY_DN1_c13_g1	cytosolic phospholipase A2 gamma-like	0.170439	0.75943	-1.08746	0.0212205	-1.2579	0.00120134
TRINITY_DN1_c13_g1	cytosolic phospholipase A2 gamma	0.170439	0.75943	-1.08746	0.0212205	-1.2579	0.00120134
TRINITY_DN1_c13_g1	RNA-binding protein 14	0.170439	0.75943	-1.08746	0.0212205	-1.2579	0.00120134
TRINITY_DN1_c18_g1	---NA---	-0.108651	0.738856	-0.395761	0.154734	-0.28711	0.183797
TRINITY_DN1_c186_g1	---NA---	0.370224	0.479163	0.149603	0.812496	-0.220621	0.57543
TRINITY_DN1_c2_g2	---NA---	-0.158194	0.746268	0.0109172	0.986238	0.169111	0.61182
TRINITY_DN1_c3_g1	T-complex protein 1 subunit theta isoform X1	-0.241902	0.319385	0.0534971	0.870773	0.295399	0.102044
TRINITY_DN1_c3_g1	---NA---	-0.241902	0.319385	0.0534971	0.870773	0.295399	0.102044
TRINITY_DN1_c30_g1	hypothetical protein XELAEV_18017724mg, partial	0.135887	0.756089	-0.294871	0.461729	-0.430758	0.126511
TRINITY_DN1_c38_g1	Collagen alpha-1(XXIV) chain	0.456037	0.403284	0.61028	0.238505	0.154243	0.712439
TRINITY_DN1_c6_g1	branched-chain amino acid ABC transporter substrate-binding protein	-0.0906097	0.717844	-0.186986	0.414323	-0.0963766	0.589165
TRINITY_DN1_c6_g2	rasGAP-activating-like protein 1	0.877449	0.682284	-0.648331	0.835031	-1.52578	0.415639
TRINITY_DN1_c6_g3	branched-chain amino acid ABC transporter substrate-binding protein	-0.037871	0.920911	0.147999	0.636075	0.18587	0.382056
TRINITY_DN1_c7_g1	Far upstream element-binding protein 2	0.412751	0.121333	0.133717	0.677668	-0.279034	0.167762
TRINITY_DN10_c0_g1	E3 SUMO-protein ligase PIAS4 isoform X2	-0.140995	0.468321	0.0741254	0.734413	0.215121	0.11336
TRINITY_DN10_c0_g1	E3 SUMO-protein ligase PIAS4	-0.140995	0.468321	0.0741254	0.734413	0.215121	0.11336
TRINITY_DN10_c0_g2	Zinc finger CCCH-type with G patch domain-containing protein	-0.128517	0.489765	-0.0554512	0.801082	0.073066	0.61214
TRINITY_DN100_c0_g2	1-acylglycerol-3-phosphate O-acyltransferase ABHD5	-0.188878	0.457618	0.0881786	0.764688	0.277057	0.124303
TRINITY_DN100_c0_g2	uncharacterized protein LOC112547415	-0.188878	0.457618	0.0881786	0.764688	0.277057	0.124303
TRINITY_DN100_c0_g3	ATP-dependent RNA helicase DHX36-like isoform X1	-0.427594	0.374713	-0.129968	0.828928	0.297626	0.425618
TRINITY_DN1000_c0_g1	---NA---	0.293831	0.241753	-0.0452031	0.899273	-0.339034	0.0742381
TRINITY_DN1000_c0_g2	---NA---	0.153284	0.768218	-0.963659	0.0397131	-1.11694	0.00364387
TRINITY_DN1000_c0_g3	SUN domain-containing protein 1 isoform X1	0.510992	0.353063	0.918496	0.0662806	0.407504	0.276534
TRINITY_DN1000_c1_g1	arf-GAP with GTPase, ANK repeat and PH domain-containing protein 1 isoform X2	-0.0629002	0.795881	0.213507	0.275962	0.276407	0.0531832
TRINITY_DN1000_c1_g1	arf-GAP with GTPase, ANK repeat and PH domain-containing protein 1-like	-0.0629002	0.795881	0.213507	0.275962	0.276407	0.0531832
TRINITY_DN10001_c0_g1	stAR-related lipid transfer protein 8 isoform X1	0.247973	0.75674	-0.319531	0.696332	-0.567504	0.270042
TRINITY_DN100026_c0_g2	hypothetical protein UY3_04659	0.248432	0.63879	-0.115997	0.856395	-0.364429	0.320648
TRINITY_DN10003_c0_g1	---NA---	0.620539	0.682297	-0.800752	0.702272	-1.42129	0.306511
TRINITY_DN10004_c0_g1	acyl-CoA-binding domain-containing protein 5 isoform X1	-0.0672012	0.659239	0.183224	0.16076	0.250425	0.0123022
TRINITY_DN10004_c0_g1	---NA---	-0.0672012	0.659239	0.183224	0.16076	0.250425	0.0123022
TRINITY_DN10004_c1_g1	Retinoic acid receptor beta	-0.0215728	0.977036	0.13509	0.841046	0.156663	0.720257
TRINITY_DN10004_c3_g1	---NA---	-0.359804	0.3614	0.194362	0.640322	0.554166	0.0455659
TRINITY_DN100063_c0_g2	vacuole membrane protein 1	0.0236356	0.945139	0.315283	0.18217	0.291647	0.0983948
TRINITY_DN100063_c0_g2	---NA---	0.0236356	0.945139	0.315283	0.18217	0.291647	0.0983948
TRINITY_DN10007_c0_g1	---NA---	0.5074	0.334683	-1.57818	0.0514302	-2.08558	0.00320982
TRINITY_DN100074_c0_g1	transcriptional adapter 2-beta	0.0449166	0.859728	0.459932	0.0132205	0.415015	0.00395362
TRINITY_DN100074_c0_g2	transcriptional adapter 2-beta	0.0556827	0.920579	0.675803	0.0685488	0.620121	0.0248619
TRINITY_DN10008_c0_g1	---NA---	-0.379031	0.81645	-2.65095	0.389137	-2.27192	0.388367
TRINITY_DN10009_c0_g1	---NA---	0.190776	0.668378	0.273541	0.507319	0.0827647	0.798479
TRINITY_DN1001_c0_g1	protease 2	-0.0697222	0.862147	-0.434983	0.168762	-0.365261	0.131662
TRINITY_DN1001_c0_g1	flotillin-1 isoform X2	-0.0697222	0.862147	-0.434983	0.168762	-0.365261	0.131662
TRINITY_DN1001_c0_g1	flotillin-1	-0.0697222	0.862147	-0.434983	0.168762	-0.365261	0.131662
TRINITY_DN10011_c0_g1	40S ribosomal protein S3a	-0.0864755	0.82731	0.215507	0.530177	0.301982	0.205918
TRINITY_DN10011_c0_g1	40S ribosomal protein S3a isoform X9	-0.0864755	0.82731	0.215507	0.530177	0.301982	0.205918
TRINITY_DN10011_c0_g2	40S ribosomal protein S3a	0.0877737	0.851182	-0.236232	0.574293	-0.324005	0.262424
TRINITY_DN10013_c0_g1	ribonuclease H2 subunit A	-0.108558	0.742342	-0.487346	0.0814982	-0.378789	0.0831815
TRINITY_DN10013_c0_g1	hypothetical protein UY3_11226	-0.108558	0.742342	-0.487346	0.0814982	-0.378789	0.0831815
TRINITY_DN10013_c0_g2	---NA---	3.50596	0.471733	0.393054	0.956044	-3.11291	0.271994
TRINITY_DN10013_c1_g1	thioredoxin-like protein 1	0.221486	0.685101	-0.0680239	0.920534	-0.28951	0.44294
TRINITY_DN10013_c1_g2	alpha-tubulin N-acetyltransferase 1 isoform X1	-0.412767	0.583841	-0.619714	0.399555	-0.206948	0.737911
TRINITY_DN10014_c0_g1	60S ribosomal protein L4	0.150022	0.854423	0.849391	0.127573	0.699369	0.0647864
TRINITY_DN100142_c0_g1	---NA---	1.54373	0.5046	-0.0681977	0.984356	-1.61192	0.262806
TRINITY_DN10015_c0_g1	RNA-directed DNA polymerase from mobile element jockey-like	-0.168256	0.673237	-0.349418	0.341415	-0.181162	0.536337
TRINITY_DN100155_c0_g3	---NA---	0.28592	0.681552	0.505417	0.393221	0.219497	0.603963
TRINITY_DN10016_c0_g1	eukaryotic translation initiation factor 3 subunit A	-0.0862107	0.739851	-0.304425	0.167114	-0.218214	0.199465
TRINITY_DN10017_c0_g1	MAP7 domain-containing protein 2 isoform X2	-0.633935	0.58565	-0.344697	0.792526	0.289237	0.753445
TRINITY_DN10017_c1_g1	---NA---	0.0226755	0.965535	-0.775246	0.0373558	-0.797922	0.00742148
TRINITY_DN10017_c1_g2	---NA---	0.0298869	0.959634	-0.754868	0.0727689	-0.784755	0.0181763
TRINITY_DN10017_c2_g1	---NA---	0.437219	0.336418	-0.114937	0.850816	-0.552157	0.104503
TRINITY_DN10017_c3_g1	glycylpeptide N-tetradecanoyltransferase 2	-0.351529	0.320505	-0.179126	0.656578	0.172403	0.548014
TRINITY_DN10018_c0_g1	lipoma HMGIC fusion partner-like 3 protein	0.0822841	0.86455	-0.0344975	0.949259	-0.116782	0.713775
TRINITY_DN10019_c0_g1	---NA---	0.658959	0.155789	-0.102622	0.878936	-0.761581	0.0333648
TRINITY_DN1002_c0_g1	DCN1-like protein 5 isoform X1	0.14582	0.375071	0.433057	0.00497904	0.287237	0.0144158
TRINITY_DN1002_c0_g1	DCN1-like 5	0.14582	0.375071	0.433057	0.00497904	0.287237	0.0144158
TRINITY_DN1002_c0_g1	DCN1-like protein 5	0.14582	0.375071	0.433057	0.00497904	0.287237	0.0144158
TRINITY_DN10021_c0_g2	TPR and ankyrin repeat-containing protein 1 isoform X1	0.0878015	0.875696	0.314005	0.492691	0.226204	0.498389
TRINITY_DN10021_c1_g1	Transposon Ty3-G Gag-Pol polyprotein	0.31162	0.508888	0.0972188	0.871392	-0.214401	0.527931
TRINITY_DN10023_c0_g1	---NA---	1.00412	0.339966	-0.0651123	0.967988	-1.06923	0.137294
TRINITY_DN100230_c0_g1	---NA---	0.420591	0.49482	0.741375	0.180699	0.320784	0.446641
TRINITY_DN10024_c0_g2	zinc finger protein 420-like	-0.444976	0.462301	-0.191631	0.787056	0.253346	0.592974
TRINITY_DN100240_c0_g1	---NA---	-0.458494	0.282576	-1.02572	0.0201858	-0.567221	0.113511
TRINITY_DN10025_c0_g2	Putative polypeptide N-acetylgalactosaminyltransferase-like protein 4	0.293218	0.450254	-0.132661	0.777327	-0.42588	0.124014
TRINITY_DN10025_c0_g3	Putative polypeptide N-acetylgalactosaminyltransferase-like protein 4	0.394129	0.421096	-0.489466	0.362962	-0.883595	0.0231703
TRINITY_DN10025_c0_g7	---NA---	0.212085	0.720156	-0.0631536	0.931608	-0.275238	0.497015
TRINITY_DN100257_c0_g1	mitochondrial peptide methionine sulfoxide reductase	-0.0874379	0.881207	0.0063654	0.993131	0.0938033	0.813868
TRINITY_DN10026_c2_g1	---NA---	0.469465	0.33994	0.527302	0.270718	0.0578377	0.888824
TRINITY_DN10026_c2_g2	cytoplasmic aconitate hydratase	-0.547544	0.370592	-0.798012	0.195273	-0.250468	0.637741
TRINITY_DN10026_c4_g1	RNA-directed DNA polymerase from mobile element jockey-like	0.124665	0.846898	0.607265	0.213151	0.4826	0.178951
TRINITY_DN10027_c0_g1	platelet endothelial aggregation receptor 1	0.17343	0.775311	-0.477915	0.378066	-0.651346	0.0948062
TRINITY_DN10029_c0_g1	translation machinery-associated protein 16	-0.53013	0.0529102	-0.2531	0.392786	0.27703	0.208067
TRINITY_DN10029_c0_g2	translation machinery-associated protein 16	-0.0190528	0.978709	0.081529	0.905643	0.100582	0.816857
TRINITY_DN100299_c0_g2	E3 ubiquitin-protein ligase RNF152	0.321581	0.588623	0.819851	0.0907349	0.49827	0.144481
TRINITY_DN1003_c0_g1	fibronectin type-III domain-containing protein 3A-like	-0.0507205	0.822563	-0.0123082	0.963274	0.0384123	0.811512
TRINITY_DN1003_c1_g1	---NA---	-0.62634	0.087648	-0.222852	0.584234	0.403488	0.165283
TRINITY_DN10031_c0_g1	apoptosis-inducing factor 2	0.3096	0.421096	1.0396	0.00241406	0.73	0.00360432
TRINITY_DN10033_c0_g1	serine/threonine-protein kinase 38	0.174684	0.781402	0.161231	0.802227	-0.0134533	0.978584
TRINITY_DN100331_c0_g1	---NA---	-0.273212	0.83746	-0.258177	0.851817	0.0150345	0.989639
TRINITY_DN10034_c0_g1	tctex1 domain-containing protein 2	-0.41821	0.216558	-0.0961152	0.825719	0.322094	0.21777
TRINITY_DN100356_c1_g1	---NA---	0.277591	0.61678	0.0940295	0.890641	-0.183561	0.650057
TRINITY_DN10037_c0_g1	sarcoplasmic/endoplasmic reticulum calcium ATPase 1-like	-0.18482	0.777571	0.0334059	0.964666	0.218226	0.607444
TRINITY_DN10037_c2_g1	hypothetical protein Y1Q_0002950	-0.527872	0.159736	-0.552026	0.15351	-0.0241538	0.950734
TRINITY_DN10039_c0_g2	zinc finger BED domain-containing protein 1	-0.634053	0.0947614	-0.284942	0.488237	0.349111	0.252574
TRINITY_DN1004_c0_g1	Methyltransferase-like protein 8	0.196514	0.494578	0.351246	0.182102	0.154732	0.450218
TRINITY_DN10041_c0_g1	E3 ubiquitin-protein ligase LRSAM1	0.626747	0.320991	1.30007	0.01538	0.673318	0.0344059
TRINITY_DN100431_c0_g1	eyes absent homolog 2-like	-0.645339	0.275432	-0.318485	0.632652	0.326854	0.505371
TRINITY_DN10044_c0_g1	transcription elongation factor 1 homolog	0.105634	0.638913	0.0661789	0.792565	-0.0394555	0.822634
TRINITY_DN10044_c1_g1	acidic leucine-rich nuclear phosphoprotein 32 family member A	-0.0575567	0.92585	-0.0839917	0.892034	-0.0264349	0.950542
TRINITY_DN10044_c3_g1	---NA---	-0.0124353	0.985117	0.0730206	0.907027	0.0854559	0.824651
TRINITY_DN100442_c0_g2	---NA---	-0.0133291	0.986762	9.19992e-05	0.999891	0.0134211	0.980962
TRINITY_DN10045_c0_g1	KICSTOR complex protein kaptin	-0.012453	0.977028	-0.316851	0.311364	-0.304398	0.190087
TRINITY_DN10045_c1_g1	RNA-directed DNA polymerase from mobile element jockey-like	-0.541369	0.694313	-1.63896	0.305779	-1.09759	0.412529
TRINITY_DN10045_c2_g1	Transposon Ty3-G Gag-Pol polyprotein	0.370767	0.791363	0.148685	0.924949	-0.222082	0.814285
TRINITY_DN10045_c4_g1	---NA---	-0.766685	0.168591	-0.00466963	0.995368	0.762015	0.0618201
TRINITY_DN10046_c0_g1	---NA---	-0.0365035	0.905012	0.32565	0.133227	0.362154	0.026762
TRINITY_DN10046_c0_g1	inactive tyrosine-protein kinase PEAK1	-0.0365035	0.905012	0.32565	0.133227	0.362154	0.026762
TRINITY_DN10046_c2_g1	---NA---	0.386571	0.124022	0.181964	0.517929	-0.204607	0.290205
TRINITY_DN10047_c0_g1	---NA---	0.451273	0.821872	-1.14849	0.656371	-1.59977	0.383911
TRINITY_DN10049_c0_g1	FRAS1-related extracellular matrix protein 1	0.799191	0.2452	-0.0121846	0.991437	-0.811376	0.120049
TRINITY_DN10049_c0_g1	glutathione hydrolase 1 proenzyme isoform X2	0.799191	0.2452	-0.0121846	0.991437	-0.811376	0.120049
TRINITY_DN10049_c0_g2	Gamma-glutamyltranspeptidase 1	-0.103772	0.849183	-0.570453	0.19931	-0.466681	0.173444
TRINITY_DN10049_c0_g2	glutathione hydrolase 1 proenzyme isoform X2	-0.103772	0.849183	-0.570453	0.19931	-0.466681	0.173444
TRINITY_DN100496_c3_g1	Retinitis pigmentosa 9 protein	-0.0132923	0.980943	-0.182247	0.692934	-0.168955	0.600918
TRINITY_DN1005_c0_g1	coiled-coil domain-containing protein 74B	-0.366806	0.279609	-1.08105	0.00266426	-0.714246	0.0130333
TRINITY_DN1005_c0_g2	ras-related protein Rab-30	-0.8483	0.0156942	-1.11612	0.00300062	-0.267819	0.396863
TRINITY_DN10051_c0_g1	E3 ubiquitin-protein ligase RNF213-like	0.775095	0.190084	0.454237	0.480506	-0.320858	0.478802
TRINITY_DN100512_c0_g1	ras-related protein R-Ras2	-0.129402	0.612857	0.0183103	0.956269	0.147713	0.408369
TRINITY_DN10052_c0_g1	intermediate filament family orphan 1 isoform X3	0.191562	0.406446	0.292787	0.178897	0.101225	0.559267
TRINITY_DN10052_c1_g1	von Willebrand factor A domain-containing protein 8	0.16148	0.864315	-0.646032	0.459032	-0.807512	0.206805
TRINITY_DN10053_c1_g1	---NA---	0.347795	0.532546	0.00288552	0.997215	-0.344909	0.384764
TRINITY_DN10053_c2_g1	leukocyte tyrosine kinase receptor	0.304551	0.443753	-1.25714	0.00292795	-1.56169	2.29261e-05
TRINITY_DN10055_c0_g1	branched-chain amino acid ABC transporter substrate-binding protein	0.00107024	0.997595	0.339472	0.184642	0.338402	0.0744168
TRINITY_DN10055_c3_g1	---NA---	0.345971	0.592127	-0.161655	0.83498	-0.507626	0.261079
TRINITY_DN10055_c4_g1	Angiotensin-converting enzyme	0.345044	0.307318	0.409544	0.21331	0.0644996	0.817871
TRINITY_DN10055_c7_g1	Putative phospholipid-transporting ATPase VB	-0.18264	0.668211	0.0458471	0.930387	0.228487	0.433979
TRINITY_DN10056_c0_g1	alpha-parvin isoform X2	-0.879317	0.0444559	-0.190108	0.719487	0.68921	0.0452817
TRINITY_DN10056_c0_g1	alpha-parvin	-0.879317	0.0444559	-0.190108	0.719487	0.68921	0.0452817
TRINITY_DN10056_c0_g2	---NA---	-0.019012	0.971516	0.370328	0.294964	0.38934	0.127236
TRINITY_DN10056_c0_g2	E3 SUMO-protein ligase NSE2	-0.019012	0.971516	0.370328	0.294964	0.38934	0.127236
TRINITY_DN10059_c0_g1	transmembrane protein 263-like isoform X1	-0.47151	0.0770065	-0.721663	0.00964999	-0.250153	0.26953
TRINITY_DN10059_c0_g2	24-hydroxycholesterol 7-alpha-hydroxylase	0.0454751	0.943496	-0.246799	0.64041	-0.292274	0.422175
TRINITY_DN1006_c0_g1	catechol O-methyltransferase	-0.315183	0.238715	-0.222792	0.440147	0.0923909	0.690643
TRINITY_DN1006_c1_g1	---NA---	0.258737	0.787484	-0.330593	0.734243	-0.58933	0.316923
TRINITY_DN10061_c0_g1	---NA---	-0.0623965	0.9455	-0.803178	0.330973	-0.740782	0.261458
TRINITY_DN100613_c0_g1	Anaphase-promoting complex subunit 4	-0.187865	0.817381	-1.0812	0.166267	-0.893333	0.163329
TRINITY_DN10062_c0_g2	zinc finger BED domain-containing protein 4-like	0.0500283	0.904748	0.0289512	0.948442	-0.0210771	0.941931
TRINITY_DN10063_c0_g1	putative nuclease HARBI1	-0.18159	0.521561	-0.383172	0.144613	-0.201582	0.336502
TRINITY_DN10063_c0_g1	Zinc finger and SCAN domain-containing protein 29	-0.18159	0.521561	-0.383172	0.144613	-0.201582	0.336502
TRINITY_DN10064_c0_g1	sphingomyelin phosphodiesterase 5	0.537293	0.44693	1.13926	0.0641615	0.601966	0.183214
TRINITY_DN10065_c0_g1	---NA---	0.16417	0.797331	-0.469921	0.4392	-0.634091	0.144365
TRINITY_DN10065_c0_g2	phosphatidate cytidylyltransferase 2	0.0916526	0.49643	0.187492	0.1286	0.0958396	0.321684
TRINITY_DN10065_c0_g2	Phosphatidate cytidylyltransferase 2	0.0916526	0.49643	0.187492	0.1286	0.0958396	0.321684
TRINITY_DN10065_c0_g3	---NA---	-0.610833	0.346435	-0.0149931	0.98754	0.59584	0.214372
TRINITY_DN10066_c0_g1	MICAL-like protein 2	-0.328707	0.401581	-0.904946	0.0195967	-0.576239	0.0632648
TRINITY_DN10067_c0_g1	hydroxyacyl-thioester dehydratase type 2, mitochondrial	-0.411881	0.0213212	0.00286227	0.992286	0.414743	0.00335904
TRINITY_DN10067_c0_g1	ribonuclease P protein subunit p14	-0.411881	0.0213212	0.00286227	0.992286	0.414743	0.00335904
TRINITY_DN10068_c0_g1	---NA---	0.206571	0.754775	-0.27247	0.687825	-0.479041	0.280351
TRINITY_DN10068_c2_g1	---NA---	0.432694	0.421658	0.0989985	0.891048	-0.333695	0.406611
TRINITY_DN10068_c3_g1	hypothetical protein UY3_13686	0.581863	0.472523	1.44253	0.0362187	0.860669	0.0807635
TRINITY_DN10069_c0_g1	hypothetical protein N301_03585, partial	0.421727	0.373837	0.224518	0.674216	-0.197209	0.579747
TRINITY_DN1007_c0_g1	---NA---	0.976356	0.13428	1.36424	0.0256821	0.387889	0.393394
TRINITY_DN1007_c1_g1	---NA---	-0.0795287	0.767946	-0.304626	0.17722	-0.225098	0.194924
TRINITY_DN1007_c1_g2	zinc finger Ran-binding domain-containing protein 2	-0.292769	0.432335	-0.325183	0.388976	-0.0324142	0.924725
TRINITY_DN1007_c1_g3	Serine/threonine-protein kinase Nek3	-0.142913	0.822563	-0.500178	0.356754	-0.357265	0.391336
TRINITY_DN1007_c3_g1	hypothetical protein UY3_05973	-0.107284	0.807677	-0.108575	0.810259	-0.00129116	0.997673
TRINITY_DN10070_c0_g1	Exocyst complex component 6B	0.635647	0.139471	-0.461488	0.339141	-1.09713	0.00232403
TRINITY_DN10070_c0_g1	G patch domain-containing protein 1	0.635647	0.139471	-0.461488	0.339141	-1.09713	0.00232403
TRINITY_DN10070_c4_g1	---NA---	0.923186	0.156758	0.125317	0.893976	-0.797869	0.0724397
TRINITY_DN10071_c0_g1	leucine-rich PPR motif-containing protein, mitochondrial	-0.212522	0.31793	-0.121301	0.611573	0.0912219	0.601868
TRINITY_DN10071_c1_g1	ATP-dependent RNA helicase DDX3X-like	0.390091	0.550815	-0.257864	0.735	-0.647956	0.158453
TRINITY_DN10072_c0_g1	---NA---	0.405329	0.323032	-0.837419	0.0485233	-1.24275	0.000402896
TRINITY_DN10072_c0_g1	liver-expressed antimicrobial peptide 2	0.405329	0.323032	-0.837419	0.0485233	-1.24275	0.000402896
TRINITY_DN10072_c1_g1	39S ribosomal protein L14, mitochondrial	-0.367443	0.107718	-0.0756805	0.796284	0.291762	0.0987783
TRINITY_DN10072_c2_g1	---NA---	0.64062	0.602655	1.92791	0.0326252	1.28729	0.00693885
TRINITY_DN10073_c0_g1	complement C2-like isoform X1	0.79823	0.343663	0.220881	0.84044	-0.577349	0.356682
TRINITY_DN10073_c1_g1	HIRA-interacting protein 3	0.234231	0.653325	-0.943628	0.0514302	-1.17786	0.0027644
TRINITY_DN10073_c3_g1	---NA---	0.181333	0.682329	-0.201979	0.656981	-0.383312	0.198423
TRINITY_DN10074_c0_g1	tctex1 domain-containing protein 3	-0.723697	0.656766	0.686613	0.571174	1.41031	0.13383
TRINITY_DN10074_c0_g1	Tctex1 domain-containing protein 3	-0.723697	0.656766	0.686613	0.571174	1.41031	0.13383
TRINITY_DN10074_c0_g2	tctex1 domain-containing protein 3	-1.44607	0.332994	0.461012	0.70251	1.90708	0.0658426
TRINITY_DN10074_c2_g1	cilia- and flagella-associated protein 161	-0.138976	0.805136	0.241837	0.632151	0.380813	0.258333
TRINITY_DN100746_c0_g1	---NA---	-0.226251	0.79113	-1.8193	0.050536	-1.59305	0.0432314
TRINITY_DN10075_c2_g1	hypothetical protein XELAEV_18027402mg	0.15923	0.662157	-0.184554	0.617477	-0.343784	0.160439
TRINITY_DN10077_c0_g1	IQ domain-containing protein K	0.118959	0.755313	0.292345	0.370581	0.173386	0.48016
TRINITY_DN10078_c0_g1	protein-glutamine gamma-glutamyltransferase K	0.510685	0.539139	0.0179819	0.988332	-0.492703	0.422112
TRINITY_DN1008_c0_g1	replication factor C subunit 4	-0.16789	0.631755	0.166243	0.632223	0.334133	0.14469
TRINITY_DN1008_c1_g1	---NA---	0.0211943	0.975326	0.0789407	0.899322	0.0577463	0.887643
TRINITY_DN10081_c0_g1	hypothetical protein N339_02630, partial	0.275818	0.714076	-1.36045	0.129048	-1.63627	0.0268591
TRINITY_DN10081_c1_g1	hypothetical protein UY3_02337	-0.335981	0.521182	0.150001	0.799736	0.485982	0.175641
TRINITY_DN10081_c2_g1	RNA-directed DNA polymerase from mobile element jockey-like	0.518912	0.443473	-0.0538747	0.956365	-0.572786	0.226725
TRINITY_DN10082_c0_g1	---NA---	-0.435279	0.44932	-0.475512	0.419507	-0.0402327	0.940805
TRINITY_DN10083_c0_g1	---NA---	0.700683	0.585795	0.483083	0.714489	-0.2176	0.802569
TRINITY_DN10084_c0_g1	---NA---	0.154465	0.797283	0.138445	0.822723	-0.0160201	0.971818
TRINITY_DN10084_c1_g1	Angiotensin-converting enzyme	0.474171	0.386834	-0.461729	0.447959	-0.9359	0.0284416
TRINITY_DN10087_c0_g1	---NA---	0.0158691	0.991091	-1.74991	0.133669	-1.76578	0.0575389
TRINITY_DN10088_c0_g1	solute carrier family 12 member 9	0.721198	0.39526	0.277167	0.788997	-0.444031	0.470108
TRINITY_DN10088_c0_g3	solute carrier family 12 member 9 isoform X1	1.04192	0.0240002	0.496812	0.309275	-0.545112	0.102251
TRINITY_DN1009_c0_g1	coiled-coil domain-containing glutamate-rich protein 1-like	-0.0491348	0.930128	-0.10241	0.848543	-0.0532749	0.885958
TRINITY_DN10090_c0_g1	---NA---	0.199824	0.69776	0.090765	0.88213	-0.109059	0.77761
TRINITY_DN10092_c0_g1	Transposon Ty3-G Gag-Pol polyprotein	-0.209047	0.760969	-0.0171287	0.984259	0.191918	0.691575
TRINITY_DN10093_c0_g1	solute carrier family 25 member 36-like	-0.187482	0.424628	-0.37493	0.093516	-0.187448	0.295679
TRINITY_DN10093_c1_g1	---NA---	0.360166	0.591207	-0.226054	0.779037	-0.586221	0.218401
TRINITY_DN10094_c0_g1	fatty aldehyde dehydrogenase	-0.406633	0.234224	-0.0529429	0.912851	0.35369	0.177212
TRINITY_DN10094_c0_g2	Thymidylate kinase	0.193311	0.860129	0.333292	0.727709	0.139981	0.832419
TRINITY_DN100952_c0_g1	Trip12 protein	-0.0774403	0.87667	0.573005	0.098267	0.650445	0.0137846
TRINITY_DN10097_c0_g3	rna-directed dna polymerase from mobile element jockey-like	-0.0227399	0.971115	0.467415	0.251799	0.490155	0.0993058
TRINITY_DN101_c0_g1	zinc finger protein 398 isoform X2	-0.246354	0.234161	-0.033619	0.90862	0.212735	0.180274
TRINITY_DN101_c0_g1	Zinc finger protein 777	-0.246354	0.234161	-0.033619	0.90862	0.212735	0.180274
TRINITY_DN101_c0_g3	zinc finger protein 282-like	-0.308282	0.357094	-0.397527	0.238185	-0.0892445	0.763955
TRINITY_DN1010_c0_g1	glycosyltransferase 8 domain-containing protein 1	-0.0201059	0.95351	0.60538	0.00705164	0.625486	0.000502408
TRINITY_DN1010_c1_g1	protein BTG1	0.695116	0.183434	1.56629	0.00154007	0.871176	0.011512
TRINITY_DN1010_c1_g2	protein BTG1	0.398773	0.156168	0.640084	0.0187966	0.241311	0.251184
TRINITY_DN10100_c0_g1	ras-related protein Rap-1A	0.132884	0.883725	0.745968	0.232446	0.613085	0.156055
TRINITY_DN10100_c0_g1	Ras-related protein Rap-1b-like	0.132884	0.883725	0.745968	0.232446	0.613085	0.156055
TRINITY_DN10100_c0_g1	---NA---	0.132884	0.883725	0.745968	0.232446	0.613085	0.156055
TRINITY_DN10106_c0_g1	mamu class II histocompatibility antigen, DR alpha chain-like	-0.465815	0.669374	0.0268027	0.985224	0.492617	0.5141
TRINITY_DN10106_c0_g3	---NA---	0.0985499	0.943709	0.338856	0.775822	0.240306	0.768246
TRINITY_DN10109_c0_g1	tyrosine-protein kinase Fes/Fps isoform X2	0.544196	0.248192	-0.481086	0.357042	-1.02528	0.0069752
TRINITY_DN10109_c0_g1	RNA-directed DNA polymerase from mobile element jockey-like	0.544196	0.248192	-0.481086	0.357042	-1.02528	0.0069752
TRINITY_DN10109_c1_g1	Putative phospholipid-transporting ATPase VB	0.187235	0.829883	-0.335147	0.689682	-0.522381	0.34345
TRINITY_DN1011_c0_g1	dihydrolipoyllysine-residue succinyltransferase component of 2-oxoglutarate dehydrogenase complex, mitochondrial	-0.0925422	0.702495	-0.420832	0.0419545	-0.32829	0.042154
TRINITY_DN1011_c0_g1	dihydrolipoyllysine-residue succinyltransferase component of 2-oxoglutarate dehydrogenase complex, mitochondrial isoform X2	-0.0925422	0.702495	-0.420832	0.0419545	-0.32829	0.042154
TRINITY_DN1011_c1_g1	transmembrane protein 248	0.153019	0.504375	0.162999	0.477192	0.00997968	0.96075
TRINITY_DN1011_c2_g1	---NA---	-0.435135	0.443989	-0.589426	0.298259	-0.154291	0.754193
TRINITY_DN10111_c1_g1	GTPase SLIP-GC	0.407946	0.466055	-0.843025	0.196523	-1.25097	0.013685
TRINITY_DN101113_c0_g1	protein FAM184B	0.449841	0.542622	0.141071	0.880186	-0.30877	0.565007
TRINITY_DN10112_c0_g1	protein NYNRIN-like	1.05564	0.6104	-0.0624465	0.983009	-1.11809	0.447115
TRINITY_DN10112_c0_g2	protein NYNRIN-like	-0.292581	0.718632	0.189434	0.828694	0.482015	0.363057
TRINITY_DN10113_c0_g1	uridine phosphorylase 1	-0.117441	0.877507	-0.413394	0.53769	-0.295953	0.560254
TRINITY_DN10113_c0_g1	---NA---	-0.117441	0.877507	-0.413394	0.53769	-0.295953	0.560254
TRINITY_DN101139_c0_g1	poly(rC)-binding protein 2	0.28808	0.628205	-0.348937	0.56816	-0.637017	0.121461
TRINITY_DN10115_c0_g1	Butyrophilin-like protein 1	0.104532	0.90367	-0.76073	0.355969	-0.865262	0.165689
TRINITY_DN10115_c0_g2	---NA---	1.31843	0.211615	0.242334	0.874701	-1.0761	0.125485
TRINITY_DN10117_c0_g1	transient receptor potential cation channel subfamily M member 7	-0.172066	0.776954	-1.00632	0.0520327	-0.834256	0.0435839
TRINITY_DN10117_c0_g2	Hippocampus abundant transcript-like protein 1	-0.381091	0.352625	-0.245076	0.586821	0.136015	0.694726
TRINITY_DN10117_c0_g3	NADP-dependent malic enzyme	1.22936	0.0570578	1.57334	0.0105104	0.343987	0.440924
TRINITY_DN10117_c0_g3	RNA polymerase II elongation factor ELL2	1.22936	0.0570578	1.57334	0.0105104	0.343987	0.440924
TRINITY_DN10117_c3_g1	E3 SUMO-protein ligase RanBP2	-0.462754	0.559378	-0.214495	0.814657	0.248259	0.69063
TRINITY_DN10118_c0_g3	nuclear factor NF-kappa-B p105 subunit isoform X1	0.081474	0.707014	0.629005	0.000606722	0.547531	0.000132954
TRINITY_DN10119_c0_g2	RNA-directed DNA polymerase from mobile element jockey-like	0.178344	0.782797	-1.31763	0.0387904	-1.49598	0.00495847
TRINITY_DN10119_c0_g5	SH2 domain-containing protein 4B	0.95008	0.286952	0.232225	0.845364	-0.717854	0.2277
TRINITY_DN1012_c0_g1	RNA-directed DNA polymerase from mobile element jockey-like	-0.100374	0.798497	-0.55162	0.0871174	-0.451245	0.0736715
TRINITY_DN1012_c1_g1	---NA---	0.0560502	0.874459	0.179627	0.544243	0.123577	0.567461
TRINITY_DN10120_c0_g1	diacylglycerol kinase kappa isoform X1	0.307172	0.67073	-0.516201	0.470657	-0.823374	0.0986791
TRINITY_DN10121_c0_g1	protein cornichon-like protein	0.0940777	0.799277	-0.31469	0.318673	-0.408767	0.0760406
TRINITY_DN10122_c0_g1	transmembrane protein 260	-1.2592	0.0210205	-0.545204	0.315794	0.713992	0.103274
TRINITY_DN10122_c0_g2	lisH domain-containing protein ARMC9 isoform X1	-0.323849	0.368702	-0.178545	0.659636	0.145303	0.62088
TRINITY_DN10122_c0_g2	---NA---	-0.323849	0.368702	-0.178545	0.659636	0.145303	0.62088
TRINITY_DN10123_c0_g1	WD repeat- and FYVE domain-containing protein 4	-0.0388131	0.963943	0.106935	0.8969	0.145748	0.777426
TRINITY_DN10123_c0_g3	WD repeat- and FYVE domain-containing protein 4	-0.0602822	0.948322	0.15275	0.85287	0.213033	0.672543
TRINITY_DN10124_c0_g1	transmembrane protein 110	-0.102779	0.526495	0.0339527	0.867124	0.136731	0.228058
TRINITY_DN10124_c0_g1	store-operated calcium entry regulator STIMATE	-0.102779	0.526495	0.0339527	0.867124	0.136731	0.228058
TRINITY_DN101246_c0_g1	zinc finger and SCAN domain-containing protein 20-like isoform X2	0.860594	0.311732	0.205575	0.866682	-0.655019	0.300092
TRINITY_DN10125_c0_g1	soluble calcium-activated nucleotidase 1	-0.223278	0.567905	-0.62309	0.0810017	-0.399812	0.156811
TRINITY_DN101259_c0_g1	cytospin-B isoform X4	0.112302	0.864721	-0.920454	0.0839688	-1.03276	0.0143485
TRINITY_DN101259_c0_g1	cytospin-B isoform X1	0.112302	0.864721	-0.920454	0.0839688	-1.03276	0.0143485
TRINITY_DN10126_c1_g2	---NA---	0.0461148	0.948791	-0.0699486	0.921863	-0.116063	0.792631
TRINITY_DN10127_c0_g1	cell division cycle 5-like protein	-0.283345	0.109723	0.211875	0.241823	0.49522	0.000515074
TRINITY_DN10127_c1_g1	---NA---	0.976506	0.157596	0.131235	0.895358	-0.84527	0.0846149
TRINITY_DN101279_c0_g1	hypothetical protein N309_13455, partial	0.500428	0.495208	1.10248	0.0694419	0.602052	0.140356
TRINITY_DN10128_c0_g2	cytokine receptor-like factor 3	-0.165881	0.43451	0.176047	0.402773	0.341929	0.0228807
TRINITY_DN10128_c1_g1	cyclic nucleotide-binding domain-containing protein 2	0.00909907	0.989229	0.345733	0.482886	0.336634	0.338806
TRINITY_DN101282_c0_g1	laminin subunit beta-2-like	0.32726	0.715292	-1.34251	0.1164	-1.66977	0.0138593
TRINITY_DN101282_c0_g1	laminin subunit beta-2	0.32726	0.715292	-1.34251	0.1164	-1.66977	0.0138593
TRINITY_DN101284_c0_g2	urea transporter 1	0.314626	0.615927	-0.0779068	0.923269	-0.392532	0.369762
TRINITY_DN1013_c0_g1	TATA box-binding protein-associated factor RNA polymerase I subunit D	-0.12859	0.571816	0.0032252	0.992294	0.131815	0.417458
TRINITY_DN1013_c0_g1	---NA---	-0.12859	0.571816	0.0032252	0.992294	0.131815	0.417458
TRINITY_DN10130_c0_g1	---NA---	0.762059	0.224388	-1.6563	0.144458	-2.41836	0.011542
TRINITY_DN10131_c0_g1	inositol hexakisphosphate kinase 3 isoform X1	-0.0148731	0.958206	0.424318	0.0220393	0.439191	0.00278657
TRINITY_DN10131_c0_g1	sec1 family domain-containing protein 1	-0.0148731	0.958206	0.424318	0.0220393	0.439191	0.00278657
TRINITY_DN10131_c0_g1	---NA---	-0.0148731	0.958206	0.424318	0.0220393	0.439191	0.00278657
TRINITY_DN10131_c0_g1	sec1 family domain-containing protein 1 isoform X1	-0.0148731	0.958206	0.424318	0.0220393	0.439191	0.00278657
TRINITY_DN10131_c1_g1	High mobility group protein 20A	0.410785	0.511358	0.399853	0.512338	-0.0109322	0.983618
TRINITY_DN10132_c0_g1	CDK5 and ABL1 enzyme substrate 1	0.040541	0.958614	-0.579158	0.334042	-0.619699	0.167789
TRINITY_DN10133_c0_g1	Zinc finger and SCAN domain-containing protein 29	0.963933	0.0593228	-0.0109485	0.989848	-0.974881	0.0149509
TRINITY_DN10133_c0_g1	---NA---	0.963933	0.0593228	-0.0109485	0.989848	-0.974881	0.0149509
TRINITY_DN101357_c1_g1	---NA---	0.174308	0.755247	-0.599089	0.266309	-0.773397	0.0558463
TRINITY_DN10136_c0_g1	WD repeat and FYVE domain-containing protein 1	0.0549655	0.813587	0.391593	0.0267373	0.336628	0.0137541
TRINITY_DN10137_c0_g1	F-box only protein 32	0.271528	0.800082	-0.380756	0.727154	-0.652284	0.349961
TRINITY_DN10138_c0_g1	2-oxoglutarate dehydrogenase, mitochondrial isoform X3	0.107651	0.86241	-0.242561	0.683484	-0.350211	0.372217
TRINITY_DN10138_c0_g1	2-oxoglutarate dehydrogenase, mitochondrial isoform X1	0.107651	0.86241	-0.242561	0.683484	-0.350211	0.372217
TRINITY_DN1014_c0_g1	cystatin precursor	0.207504	0.693228	0.32521	0.504848	0.117706	0.759631
TRINITY_DN1014_c0_g2	---NA---	-0.111879	0.53391	-0.401556	0.0143245	-0.289677	0.0237746
TRINITY_DN1014_c0_g2	exportin-6 isoform X3	-0.111879	0.53391	-0.401556	0.0143245	-0.289677	0.0237746
TRINITY_DN1014_c1_g1	CKLF-like MARVEL transmembrane domain-containing protein 4	-0.355764	0.374538	-0.0662884	0.901481	0.289475	0.33855
TRINITY_DN1014_c2_g1	---NA---	-0.0158551	0.983095	-0.252575	0.672424	-0.23672	0.573191
TRINITY_DN1014_c2_g2	---NA---	-0.147067	0.592395	0.179645	0.489888	0.326712	0.0700092
TRINITY_DN1014_c2_g4	CUGBP Elav-like family member 2 isoform X8	0.035923	0.956038	-0.161747	0.773526	-0.19767	0.593415
TRINITY_DN10141_c0_g1	AN1-type zinc finger protein 5	-0.272053	0.706222	0.0240842	0.978062	0.296137	0.54352
TRINITY_DN10141_c1_g1	---NA---	0.316244	0.693013	-0.0307838	0.97669	-0.347028	0.533148
TRINITY_DN101419_c0_g1	neuron-specific protein family member 2	-1.00188	0.0903388	-0.323607	0.601726	0.678271	0.148652
TRINITY_DN101419_c1_g1	---NA---	0.449224	0.59561	-0.145432	0.896333	-0.594655	0.328141
TRINITY_DN101419_c3_g1	---NA---	0.254439	0.752489	-0.262645	0.758233	-0.517084	0.337265
TRINITY_DN101421_c0_g1	long-chain fatty acid transport protein 3	-0.0305704	0.972162	-0.354299	0.605249	-0.323729	0.508293
TRINITY_DN10143_c1_g1	ATP-dependent RNA helicase A-like	0.412216	0.622405	0.307467	0.72904	-0.10475	0.862192
TRINITY_DN101477_c0_g1	---NA---	0.277787	0.556223	0.0270964	0.966655	-0.25069	0.462767
TRINITY_DN10148_c0_g1	potassium voltage-gated channel subfamily A member 3	0.630631	0.241753	0.609137	0.257939	-0.0214944	0.964873
TRINITY_DN1015_c0_g1	cyclin-dependent kinase 12 isoform X2	-0.0372876	0.887177	-0.0786596	0.748364	-0.041372	0.81751
TRINITY_DN1015_c1_g1	Ras-related GTP-binding protein C	-0.108444	0.661166	0.256793	0.230367	0.365237	0.0216359
TRINITY_DN1015_c1_g1	ras-related GTP-binding protein C-like	-0.108444	0.661166	0.256793	0.230367	0.365237	0.0216359
TRINITY_DN1015_c1_g1	ras-related GTP-binding protein C	-0.108444	0.661166	0.256793	0.230367	0.365237	0.0216359
TRINITY_DN10152_c0_g1	---NA---	0.508469	0.441833	-0.0584572	0.949782	-0.566927	0.229364
TRINITY_DN10152_c2_g1	---NA---	0.19831	0.808564	-0.485412	0.521792	-0.683722	0.194936
TRINITY_DN10153_c0_g1	---NA---	-0.0684424	0.864209	0.247687	0.443719	0.31613	0.164406
TRINITY_DN10154_c0_g1	---NA---	-1.25103	0.0358072	-1.6596	0.0109074	-0.408565	0.481978
TRINITY_DN10155_c0_g5	---NA---	-0.0993439	0.866872	-1.11409	0.0265064	-1.01474	0.0135218
TRINITY_DN10156_c0_g1	---NA---	0.367631	0.232727	-0.0757152	0.859721	-0.443346	0.0574397
TRINITY_DN10156_c0_g1	ribosome biogenesis protein BOP1	0.367631	0.232727	-0.0757152	0.859721	-0.443346	0.0574397
TRINITY_DN10159_c0_g1	protein FAM229A	0.359465	0.676278	0.313124	0.720221	-0.046341	0.941719
TRINITY_DN1016_c0_g1	LSM8 homolog, U6 small nuclear RNA associated	-0.276186	0.158026	-0.0657977	0.792526	0.210388	0.162438
TRINITY_DN1016_c1_g1	thioredoxin domain-containing protein 5	-0.120937	0.492227	-0.0298961	0.896399	0.0910407	0.491081
TRINITY_DN1016_c1_g2	ras-related protein Rab-33B	-0.815044	0.154	0.459023	0.423074	1.27407	0.00279677
TRINITY_DN1016_c2_g1	---NA---	0.410031	0.196145	0.00842922	0.986879	-0.401602	0.0967769
TRINITY_DN1016_c2_g2	Coiled-coil domain-containing protein 66	-0.26105	0.825748	0.0883066	0.944759	0.349356	0.630827
TRINITY_DN1016_c4_g1	tau-tubulin kinase 2 isoform X1	-0.0414493	0.921748	-0.0861487	0.828625	-0.0446994	0.873911
TRINITY_DN1016_c4_g1	Tau-tubulin kinase 2	-0.0414493	0.921748	-0.0861487	0.828625	-0.0446994	0.873911
TRINITY_DN10160_c1_g1	---NA---	0.173174	0.86912	-0.792226	0.458424	-0.9654	0.221849
TRINITY_DN10161_c0_g2	---NA---	-0.472419	0.135259	-1.08156	0.00168802	-0.609143	0.0238214
TRINITY_DN10163_c0_g1	complement receptor type 2-like	0.255572	0.685387	0.291564	0.632356	0.0359925	0.940676
TRINITY_DN10164_c0_g1	ectonucleoside triphosphate diphosphohydrolase 6 isoform X1	-0.508405	0.0468185	-0.072059	0.832232	0.436346	0.0292285
TRINITY_DN10164_c0_g1	ectonucleoside triphosphate diphosphohydrolase 6	-0.508405	0.0468185	-0.072059	0.832232	0.436346	0.0292285
TRINITY_DN10166_c0_g1	angiogenic factor with G patch and FHA domains 1 isoform X1	-0.216884	0.772735	-0.0442851	0.959278	0.172598	0.735618
TRINITY_DN10167_c0_g2	spermatogenesis-associated protein 4	-0.119016	0.816634	0.667537	0.0790475	0.786553	0.0073364
TRINITY_DN10168_c0_g1	tyrosine-protein kinase JAK3	0.441905	0.496144	-1.06656	0.23363	-1.50846	0.0323412
TRINITY_DN10169_c0_g1	---NA---	-0.315558	0.539747	-0.197358	0.72694	0.1182	0.779365
TRINITY_DN10169_c0_g3	RING finger protein 214	0.132163	0.902194	-0.68294	0.493944	-0.815103	0.242412
TRINITY_DN1017_c0_g1	annexin A10	0.0509875	0.876208	0.0592102	0.862175	0.0082227	0.973246
TRINITY_DN1017_c0_g2	tropomyosin alpha-3 chain-like	-0.091359	0.868907	0.11351	0.836342	0.204869	0.545541
TRINITY_DN1017_c0_g3	branched-chain amino acid ABC transporter substrate-binding protein	-0.13328	0.64914	-0.318779	0.227573	-0.185499	0.370819
TRINITY_DN1017_c1_g1	dual specificity mitogen-activated protein kinase kinase 2	0.0897677	0.739091	-0.0802723	0.779389	-0.17004	0.338806
TRINITY_DN1017_c1_g1	V-type proton ATPase subunit S1	0.0897677	0.739091	-0.0802723	0.779389	-0.17004	0.338806
TRINITY_DN1017_c2_g1	hypothetical protein UY3_04758	-0.384322	0.328377	-0.441164	0.275787	-0.056842	0.879714
TRINITY_DN1017_c4_g1	---NA---	-0.0520458	0.945849	-0.224221	0.733473	-0.172175	0.713279
TRINITY_DN10170_c0_g1	hypothetical protein UY3_16349	0.217102	0.68094	0.144833	0.800573	-0.0722684	0.855426
TRINITY_DN10170_c0_g1	2'-5'-oligoadenylate synthase 1A	0.217102	0.68094	0.144833	0.800573	-0.0722684	0.855426
TRINITY_DN10173_c0_g1	NADH dehydrogenase [ubiquinone] 1 alpha subcomplex subunit 13	-0.0818148	0.802472	0.0175347	0.964273	0.0993495	0.652028
TRINITY_DN10174_c0_g1	coiled-coil domain-containing protein 25 isoform X2	-0.084542	0.701918	-0.104521	0.632652	-0.0199786	0.911326
TRINITY_DN10174_c0_g2	---NA---	0.22153	0.586925	-0.0614215	0.907027	-0.282951	0.320083
TRINITY_DN10174_c1_g1	---NA---	-0.467426	0.334683	-0.330364	0.526351	0.137062	0.745725
TRINITY_DN10174_c4_g1	---NA---	0.451845	0.377046	0.246241	0.669848	-0.205604	0.604822
TRINITY_DN10174_c5_g1	hypothetical protein UY3_04795	-0.157676	0.823766	-0.679869	0.28006	-0.522193	0.293448
TRINITY_DN101748_c0_g1	SERTA domain-containing protein 2	-0.178227	0.426368	-0.27858	0.199402	-0.100353	0.575022
TRINITY_DN10175_c0_g2	TBC1 domain family member 1	0.191185	0.78654	-0.0960553	0.905979	-0.28724	0.515766
TRINITY_DN10175_c0_g2	Zinc finger and SCAN domain-containing protein 29	0.191185	0.78654	-0.0960553	0.905979	-0.28724	0.515766
TRINITY_DN10176_c0_g1	synaptogyrin-3	-0.0515583	0.920911	0.102892	0.831301	0.15445	0.613537
TRINITY_DN10178_c0_g1	glycolipid transfer protein domain-containing protein 2 isoform X1	-0.271551	0.601218	-0.274688	0.603149	-0.00313623	0.995659
TRINITY_DN10178_c0_g1	ceramide-1-phosphate transfer protein-like	-0.271551	0.601218	-0.274688	0.603149	-0.00313623	0.995659
TRINITY_DN10178_c0_g2	---NA---	-0.61907	0.390785	-0.151479	0.865819	0.467591	0.392982
TRINITY_DN101794_c0_g1	---NA---	0.396817	0.85976	0.593278	0.769349	0.196461	0.881611
TRINITY_DN1018_c0_g1	nipped-B-like protein isoform X1	-0.0234813	0.913412	0.288133	0.0569422	0.311614	0.0083653
TRINITY_DN1018_c0_g1	nipped-B-like protein	-0.0234813	0.913412	0.288133	0.0569422	0.311614	0.0083653
TRINITY_DN1018_c0_g1	nipped-B-like protein isoform X5	-0.0234813	0.913412	0.288133	0.0569422	0.311614	0.0083653
TRINITY_DN1018_c1_g1	---NA---	0.0627688	0.924437	-0.651511	0.212898	-0.71428	0.0743941
TRINITY_DN101809_c0_g1	---NA---	0.0582287	0.946761	0.581253	0.325394	0.523024	0.205382
TRINITY_DN10181_c0_g1	Bardet-Biedl syndrome 4 protein	-0.542942	0.166488	-0.743483	0.0642115	-0.20054	0.566237
TRINITY_DN10181_c0_g1	---NA---	-0.542942	0.166488	-0.743483	0.0642115	-0.20054	0.566237
TRINITY_DN101810_c0_g1	---NA---	0.754945	0.241333	-0.278971	0.738047	-1.03392	0.0389623
TRINITY_DN10182_c0_g1	Zinc finger and SCAN domain-containing protein 29	0.215658	0.288013	0.291349	0.139126	0.0756908	0.641839
TRINITY_DN10182_c0_g1	lethal(2) giant larvae protein homolog 2	0.215658	0.288013	0.291349	0.139126	0.0756908	0.641839
TRINITY_DN10183_c0_g1	hypothetical protein UY3_16349	0.0555851	0.938614	-0.491283	0.405943	-0.546868	0.209039
TRINITY_DN10183_c0_g2	hypothetical protein UY3_16349	-0.500971	0.134947	-0.186432	0.631523	0.31454	0.235856
TRINITY_DN10184_c0_g2	Protein phosphatase methylesterase 1	0.3937	0.353949	0.19043	0.698692	-0.20327	0.529407
TRINITY_DN10185_c0_g1	PMS1 protein like protein 1	-0.28125	0.651309	-0.230101	0.728151	0.0511492	0.922718
TRINITY_DN10185_c0_g3	---NA---	1.07305	0.151304	0.0908196	0.936274	-0.982226	0.0601355
TRINITY_DN10186_c0_g1	E3 ubiquitin-protein ligase TRIM23 isoform X3	-0.00492704	0.986747	0.558896	0.0036895	0.563824	0.000285905
TRINITY_DN10186_c0_g1	E3 ubiquitin-protein ligase TRIM23 isoform X1	-0.00492704	0.986747	0.558896	0.0036895	0.563824	0.000285905
TRINITY_DN10186_c0_g1	E3 ubiquitin-protein ligase TRIM23	-0.00492704	0.986747	0.558896	0.0036895	0.563824	0.000285905
TRINITY_DN10188_c0_g1	Olfactory receptor 6Y1	0.378242	0.633149	0.430094	0.566909	0.0518519	0.930854
TRINITY_DN10189_c0_g1	hypothetical protein UY3_09645	0.470369	0.408	0.464847	0.412386	-0.00552159	0.992307
TRINITY_DN10189_c1_g2	---NA---	-0.338417	0.560969	-0.0901632	0.899056	0.248254	0.556812
TRINITY_DN10189_c1_g3	TBC1 domain family member 22A	-0.154067	0.829883	1.21628	0.00813082	1.37035	0.0001327
TRINITY_DN1019_c0_g1	chromobox protein homolog 3 isoform X2	-0.355082	0.0561901	0.1757	0.376467	0.530781	0.000474029
TRINITY_DN1019_c0_g1	chromobox protein homolog 3 isoform X1	-0.355082	0.0561901	0.1757	0.376467	0.530781	0.000474029
TRINITY_DN10190_c0_g1	chromatin assembly factor 1 subunit A	0.233809	0.56101	0.334506	0.374	0.100696	0.740488
TRINITY_DN10190_c0_g1	---NA---	0.233809	0.56101	0.334506	0.374	0.100696	0.740488
TRINITY_DN10191_c2_g1	---NA---	0.239882	0.670398	-0.142464	0.826915	-0.382346	0.322846
TRINITY_DN101915_c0_g1	V-type proton ATPase catalytic subunit A	0.076323	0.875473	0.621599	0.0721813	0.545276	0.0348749
TRINITY_DN10193_c0_g1	WD repeat-containing protein 7	0.633498	0.342111	0.324252	0.665033	-0.309247	0.518008
TRINITY_DN10194_c0_g1	Nuclear fragile X mental retardation-interacting protein 1	-0.516556	0.273296	-0.176765	0.751789	0.33979	0.363118
TRINITY_DN10195_c0_g1	zinc finger protein 229-like	-0.0960986	0.802441	0.0493448	0.909371	0.145443	0.560071
TRINITY_DN10196_c1_g1	---NA---	-0.232243	0.709436	-1.81211	0.0234145	-1.57986	0.0222352
TRINITY_DN101966_c0_g1	---NA---	0.151261	0.839671	0.039985	0.963095	-0.111276	0.827915
TRINITY_DN101968_c0_g1	PR domain zinc finger protein 1	0.322067	0.822597	0.449569	0.718725	0.127503	0.873414
TRINITY_DN101968_c0_g1	tissue-resident T-cell transcription regulator protein ZNF683	0.322067	0.822597	0.449569	0.718725	0.127503	0.873414
TRINITY_DN10197_c0_g1	RNA-directed DNA polymerase from mobile element jockey-like	0.238556	0.824799	-0.328015	0.77551	-0.566571	0.437126
TRINITY_DN10199_c0_g1	Oral-facial-digital syndrome 1 protein	0.41221	0.620388	-0.363862	0.691176	-0.776072	0.184565
TRINITY_DN102_c0_g1	Tectonin beta-propeller repeat-containing protein 1	-0.0861668	0.656176	-0.333185	0.0466144	-0.247018	0.0585896
TRINITY_DN102_c1_g1	charged multivesicular body protein 7	-0.16968	0.277855	-0.428062	0.00602218	-0.258383	0.0321458
TRINITY_DN102_c1_g2	asparagine--tRNA ligase, cytoplasmic	0.184285	0.648326	0.22163	0.573084	0.0373445	0.90847
TRINITY_DN102_c12_g1	RNA-directed DNA polymerase from mobile element jockey-like	0.106471	0.908749	-0.548745	0.498595	-0.655216	0.262959
TRINITY_DN102_c2_g2	Forkhead box protein P4	0.325944	0.398494	0.183883	0.671053	-0.142061	0.637726
TRINITY_DN102_c3_g2	Transposon Ty3-G Gag-Pol polyprotein	-0.16764	0.77486	0.0984182	0.879808	0.266058	0.479158
TRINITY_DN102_c4_g1	---NA---	0.0847373	0.865127	-0.400777	0.328766	-0.485514	0.106584
TRINITY_DN1020_c0_g1	integrin alpha-4	0.388321	0.315959	1.2184	0.000930732	0.830079	0.00233288
TRINITY_DN1020_c1_g1	DNA-directed RNA polymerase III subunit RPC1	0.0843547	0.710136	-0.13777	0.522319	-0.222124	0.135187
TRINITY_DN1020_c1_g1	AN1-type zinc finger protein 4	0.0843547	0.710136	-0.13777	0.522319	-0.222124	0.135187
TRINITY_DN1020_c1_g2	multiple coagulation factor deficiency protein 2	-0.00551807	0.986762	0.369736	0.0991042	0.375254	0.0281819
TRINITY_DN1020_c2_g1	ATP synthase F(0) complex subunit C3, mitochondrial	-0.103415	0.694511	0.25923	0.248917	0.362645	0.0282508
TRINITY_DN10201_c0_g1	---NA---	-0.267405	0.137118	-0.126866	0.528839	0.140538	0.33026
TRINITY_DN10201_c0_g1	pre-mRNA-processing factor 39 isoform X2	-0.267405	0.137118	-0.126866	0.528839	0.140538	0.33026
TRINITY_DN10201_c0_g3	pre-mRNA-processing factor 39 isoform X1	-0.293346	0.58565	-0.472387	0.357782	-0.179041	0.67323
TRINITY_DN10202_c0_g2	thymic stromal cotransporter homolog	0.191038	0.739626	-0.07552	0.913538	-0.266558	0.494589
TRINITY_DN10204_c2_g1	rna-directed dna polymerase from mobile element jockey-like	0.124828	0.902725	-1.11235	0.340609	-1.23718	0.187024
TRINITY_DN10206_c0_g1	dual specificity mitogen-activated protein kinase kinase 5 isoform X3	-0.0968838	0.872167	-0.506466	0.305676	-0.409583	0.273745
TRINITY_DN10206_c0_g1	dual specificity mitogen-activated protein kinase kinase 5 isoform X2	-0.0968838	0.872167	-0.506466	0.305676	-0.409583	0.273745
TRINITY_DN10206_c0_g1	dual specificity mitogen-activated protein kinase kinase 5 isoform X1	-0.0968838	0.872167	-0.506466	0.305676	-0.409583	0.273745
TRINITY_DN10206_c0_g3	rna-directed dna polymerase from mobile element jockey-like	-0.0940194	0.859619	0.0795114	0.887977	0.173531	0.606801
TRINITY_DN10207_c0_g1	---NA---	0.227285	0.612493	-0.158803	0.749492	-0.386088	0.209275
TRINITY_DN10208_c0_g1	Adenosine monophosphate-protein transferase FICD	-0.145233	0.535357	0.147496	0.521993	0.292728	0.0636454
TRINITY_DN1021_c0_g1	stomatin-like protein 2, mitochondrial	-0.0919872	0.775418	-0.64078	0.0161955	-0.548793	0.00961686
TRINITY_DN10211_c0_g1	protein RUFY3 isoform X1	0.0774351	0.810024	0.316222	0.2142	0.238787	0.209763
TRINITY_DN10211_c0_g1	protein RUFY3 isoform X6	0.0774351	0.810024	0.316222	0.2142	0.238787	0.209763
TRINITY_DN10211_c1_g1	C-terminal-binding protein 1-like isoform X2	0.524428	0.138917	0.944487	0.00537149	0.420059	0.0852179
TRINITY_DN10212_c0_g1	rna-directed dna polymerase from mobile element jockey-like	0.11041	0.922504	0.932807	0.186098	0.822397	0.0683456
TRINITY_DN10212_c1_g1	AF355752_1reverse transcriptase	-0.212	0.663586	-0.762753	0.080593	-0.550754	0.11101
TRINITY_DN10213_c0_g1	hypothetical protein UY3_11226	0.598545	0.19179	0.0646897	0.923654	-0.533855	0.123969
TRINITY_DN10213_c1_g1	Butyrophilin-like protein 2	-0.518436	0.31133	-0.0746523	0.916005	0.443784	0.254642
TRINITY_DN10213_c2_g1	---NA---	0.318524	0.659701	0.0567439	0.950329	-0.26178	0.59585
TRINITY_DN10215_c1_g1	myosin light chain 5	-0.338424	0.322914	0.151161	0.700993	0.489585	0.0496582
TRINITY_DN10215_c2_g1	sterile alpha motif domain-containing protein 9-like	0.575725	0.517161	-0.404763	0.693176	-0.980489	0.129248
TRINITY_DN10215_c3_g1	hypothetical protein Y1Q_0006166	-0.182961	0.705122	0.23426	0.595626	0.417222	0.15275
TRINITY_DN10216_c0_g1	F-box/WD repeat-containing protein 11-like	-0.128488	0.808172	0.0540499	0.928418	0.182538	0.597914
TRINITY_DN10218_c0_g2	protein ALP1-like	0.0567949	0.933507	0.385959	0.41948	0.329164	0.331978
TRINITY_DN1022_c0_g1	39S ribosomal protein L20, mitochondrial	-0.376002	0.109444	-0.0998297	0.730494	0.276172	0.131674
TRINITY_DN10220_c0_g1	ATP-dependent 6-phosphofructokinase, liver type	-0.178795	0.664732	-0.57982	0.115943	-0.401026	0.165855
TRINITY_DN10222_c0_g1	sialin isoform X2	-0.00576082	0.983692	0.319137	0.0772391	0.324898	0.0191171
TRINITY_DN10222_c0_g1	sialin isoform X1	-0.00576082	0.983692	0.319137	0.0772391	0.324898	0.0191171
TRINITY_DN10222_c1_g1	hypothetical protein N311_12544, partial	0.269622	0.772735	-0.66927	0.462352	-0.938892	0.151688
TRINITY_DN10223_c1_g1	---NA---	0.270413	0.580814	-0.641963	0.199098	-0.912375	0.0167999
TRINITY_DN10224_c3_g1	immunoglobulin superfamily member 3 isoform X2	0.0660695	0.909951	-0.185836	0.724762	-0.251906	0.468772
TRINITY_DN10225_c0_g1	Zinc finger and SCAN domain-containing protein 20	-0.190523	0.745356	-0.297578	0.61026	-0.107055	0.820966
TRINITY_DN10225_c0_g3	Response gene to complement 32 protein	1.08976	0.270611	0.713243	0.48439	-0.376521	0.56948
TRINITY_DN10225_c0_g3	Zinc finger and SCAN domain-containing protein 20	1.08976	0.270611	0.713243	0.48439	-0.376521	0.56948
TRINITY_DN10225_c1_g1	Zinc finger and SCAN domain-containing protein 29	0.402427	0.334375	0.27971	0.531239	-0.122716	0.718084
TRINITY_DN10226_c2_g1	Constitutive coactivator of peroxisome proliferator-activated receptor gamma	1.46802	0.160648	-1.11728	0.411596	-2.58531	0.00920652
TRINITY_DN10227_c0_g1	Xanthine dehydrogenase/oxidase	-0.20457	0.752509	-0.121875	0.870153	0.082695	0.868847
TRINITY_DN10228_c0_g1	---NA---	0.0213055	0.943884	0.380283	0.0583901	0.358977	0.0192725
TRINITY_DN10228_c0_g1	dnaJ homolog subfamily B member 11	0.0213055	0.943884	0.380283	0.0583901	0.358977	0.0192725
TRINITY_DN1023_c3_g3	ubiquitin carboxyl-terminal hydrolase 7-like	-0.536239	0.548904	-1.08692	0.288676	-0.550685	0.54197
TRINITY_DN1023_c4_g1	ubiquitin carboxyl-terminal hydrolase 7-like	0.449453	0.151304	0.747051	0.0120131	0.297598	0.176501
TRINITY_DN10230_c0_g1	Hairy/enhancer-of-split related with YRPW motif protein 2	-0.0291407	0.962511	0.488825	0.239316	0.517966	0.087701
TRINITY_DN10231_c0_g2	ORF2	0.703723	0.290802	0.55642	0.404301	-0.147303	0.7556
TRINITY_DN10231_c0_g4	pre-miRNA 5'-monophosphate methyltransferase	-0.153353	0.578082	-0.319783	0.207897	-0.16643	0.410083
TRINITY_DN10231_c3_g1	neuron navigator 3-like	-0.0528888	0.942665	-0.217484	0.732001	-0.164595	0.715565
TRINITY_DN10232_c1_g2	---NA---	0.603826	0.581136	0.329201	0.776937	-0.274625	0.660845
TRINITY_DN10232_c1_g4	Calpain-3	-0.28301	0.585961	-0.291999	0.577683	-0.00898815	0.985408
TRINITY_DN102344_c0_g1	RNA-directed DNA polymerase from mobile element jockey-like	-0.188568	0.669071	0.224618	0.584021	0.413186	0.133256
TRINITY_DN102344_c1_g1	SH2 domain-containing protein 4B	0.489959	0.362902	0.309259	0.593446	-0.1807	0.637589
TRINITY_DN10235_c0_g1	RNA-directed DNA polymerase from mobile element jockey	-0.0662249	0.815137	-0.0757452	0.791849	-0.00952033	0.965628
TRINITY_DN10235_c1_g1	iodotyrosine deiodinase 1 isoform X3	-0.19959	0.462301	0.199523	0.456085	0.399113	0.0329987
TRINITY_DN10235_c2_g1	annexin A10	0.429763	0.672913	2.34468	0.00153593	1.91491	7.38383e-05
TRINITY_DN102354_c0_g1	D-glutamate cyclase, mitochondrial	-0.424653	0.384872	0.503813	0.26334	0.928466	0.00688532
TRINITY_DN10236_c0_g4	---NA---	0.0550156	0.911664	0.00701211	0.990316	-0.0480035	0.885727
TRINITY_DN10236_c1_g1	Voltage-gated potassium channel subunit beta-1	0.886178	0.168914	-0.384586	0.67623	-1.27076	0.0279297
TRINITY_DN10238_c0_g1	WD repeat-containing protein 82	-0.0619467	0.920252	0.0156395	0.981517	0.0775862	0.848462
TRINITY_DN102381_c0_g1	SH3 domain-containing kinase-binding protein 1	0.43034	0.409825	-0.0138181	0.986402	-0.444158	0.248834
TRINITY_DN1024_c0_g1	nuclear transcription factor Y subunit alpha isoform X1	-0.183267	0.289159	0.298594	0.0708929	0.481862	0.000384604
TRINITY_DN1024_c0_g1	---NA---	-0.183267	0.289159	0.298594	0.0708929	0.481862	0.000384604
TRINITY_DN1024_c0_g1	nuclear transcription factor Y subunit alpha isoform X6	-0.183267	0.289159	0.298594	0.0708929	0.481862	0.000384604
TRINITY_DN102400_c0_g1	MAP kinase-activated protein kinase 5 isoform X3	0.450788	0.58822	0.296251	0.731516	-0.154537	0.781722
TRINITY_DN102404_c1_g1	general transcription factor IIF subunit 2	-0.183586	0.725398	0.441184	0.29742	0.62477	0.0394343
TRINITY_DN10241_c0_g2	zinc finger protein 501-like	-1.06479	0.0742382	0.178917	0.796968	1.24371	0.00693885
TRINITY_DN10242_c0_g1	polycomb protein SCMH1 isoform X1	0.506796	0.53697	-0.0510629	0.967363	-0.557859	0.385416
TRINITY_DN102440_c0_g1	---NA---	0.104471	0.809705	-0.348275	0.348285	-0.452746	0.0932001
TRINITY_DN102443_c1_g1	Retinoic acid receptor beta	1.22246	0.136029	-0.241251	0.846107	-1.46371	0.0222146
TRINITY_DN10245_c0_g2	RNA-directed DNA polymerase from mobile element jockey-like	0.183473	0.765813	-0.74804	0.220116	-0.931513	0.045295
TRINITY_DN10245_c0_g2	X-ray radiation resistance-associated protein 1	0.183473	0.765813	-0.74804	0.220116	-0.931513	0.045295
TRINITY_DN10245_c0_g4	Retrovirus-related Pol polyprotein from transposon 17.6	-0.110642	0.862042	-0.75691	0.214194	-0.646269	0.189865
TRINITY_DN10245_c2_g1	carbonic anhydrase 3-like isoform X2	0.224224	0.76739	-0.064449	0.943831	-0.288673	0.567348
TRINITY_DN10245_c4_g1	---NA---	0.111849	0.882017	-0.611933	0.38123	-0.723782	0.164406
TRINITY_DN10246_c0_g1	ryanodine receptor 1	-0.696782	0.40327	-0.753813	0.387915	-0.0570303	0.94576
TRINITY_DN10246_c1_g1	Integrin alpha-8	0.0987266	0.946671	-0.333479	0.813208	-0.432205	0.644183
TRINITY_DN10246_c2_g1	inositol hexakisphosphate kinase 3 isoform X1	0.626598	0.58911	0.430023	0.716409	-0.196575	0.79439
TRINITY_DN102464_c0_g1	putative nuclease HARBI1 isoform X1	0.516967	0.621963	-0.690866	0.612782	-1.20783	0.199948
TRINITY_DN102464_c0_g1	tRNA (cytosine(38)-C(5))-methyltransferase	0.516967	0.621963	-0.690866	0.612782	-1.20783	0.199948
TRINITY_DN10247_c0_g1	---NA---	-0.228843	0.696288	0.0735666	0.91729	0.302409	0.447718
TRINITY_DN10248_c1_g2	---NA---	-0.145681	0.753649	-0.420477	0.319216	-0.274796	0.410294
TRINITY_DN10248_c1_g3	---NA---	-0.270243	0.524899	-0.300403	0.48017	-0.0301601	0.937363
TRINITY_DN10248_c3_g1	---NA---	0.143593	0.889414	-0.198195	0.854498	-0.341789	0.608262
TRINITY_DN10248_c3_g2	Protein PTHB1	-0.0408925	0.968571	-0.0428183	0.967363	-0.00192582	0.998214
TRINITY_DN10249_c0_g1	septin-2	-0.107436	0.527598	0.219262	0.151971	0.326698	0.00582076
TRINITY_DN10249_c0_g1	---NA---	-0.107436	0.527598	0.219262	0.151971	0.326698	0.00582076
TRINITY_DN1025_c0_g1	proteasome subunit alpha type-3	-0.235717	0.221199	0.000929228	0.997699	0.236646	0.106946
TRINITY_DN1025_c1_g1	cTAGE family member 5 isoform X5	0.0866147	0.917556	0.0394601	0.964965	-0.0471546	0.93362
TRINITY_DN10250_c0_g1	2-aminoethanethiol dioxygenase	-0.198694	0.53771	-0.0706278	0.858283	0.128066	0.596978
TRINITY_DN102517_c0_g1	---NA---	0.238882	0.733128	0.0323253	0.970782	-0.206557	0.670345
TRINITY_DN10252_c0_g1	UPF0594 protein C13orf38 like protein	-0.183802	0.558607	-0.896262	0.00266259	-0.712459	0.00291835
TRINITY_DN10254_c0_g1	alpha-1,6-mannosyl-glycoprotein 2-beta-N-acetylglucosaminyltransferase	-0.0436668	0.903817	-0.144021	0.642496	-0.100354	0.657797
TRINITY_DN102556_c0_g1	UPF0594 protein C13orf38 like protein	-0.200227	0.739886	0.0860638	0.901611	0.286291	0.473764
TRINITY_DN10257_c0_g1	---NA---	0.124495	0.779415	-0.250077	0.541955	-0.374572	0.185206
TRINITY_DN10257_c0_g4	---NA---	1.02499	0.437471	0.791653	0.538698	-0.233332	0.774157
TRINITY_DN10257_c1_g1	---NA---	0.211302	0.818238	0.658036	0.374189	0.446735	0.411443
TRINITY_DN10259_c0_g1	ORM1-like protein 1	-0.254312	0.245504	-0.155917	0.515665	0.0983947	0.589174
TRINITY_DN1026_c0_g1	WD repeat-containing protein 44	-0.100958	0.507423	0.0610671	0.718827	0.162025	0.129021
TRINITY_DN1026_c0_g1	ankyrin repeat and BTB/POZ domain-containing protein 1	-0.100958	0.507423	0.0610671	0.718827	0.162025	0.129021
TRINITY_DN1026_c0_g1	WD repeat-containing protein 44 isoform X1	-0.100958	0.507423	0.0610671	0.718827	0.162025	0.129021
TRINITY_DN1026_c0_g2	WD repeat-containing protein 44	0.316984	0.619482	-0.289445	0.674258	-0.60643	0.172391
TRINITY_DN1026_c1_g1	Sec1 family domain-containing protein 1	-0.231351	0.780959	-0.309271	0.704011	-0.0779201	0.908993
TRINITY_DN10260_c0_g1	zinc finger protein 572-like	0.242656	0.794437	0.550612	0.478879	0.307955	0.581826
TRINITY_DN102608_c2_g1	Butyrophilin-like protein 2	-0.614368	0.164143	-0.666844	0.157091	-0.0524761	0.913333
TRINITY_DN10261_c0_g2	Putative hydrolase RBBP9	0.0131844	0.984716	-0.016859	0.980731	-0.0300434	0.944701
TRINITY_DN102616_c0_g1	HEAT repeat-containing protein 5B-like	0.547185	0.282576	-0.114019	0.88232	-0.661204	0.11181
TRINITY_DN10267_c0_g1	transcription initiation factor TFIID subunit 9B	-0.247819	0.291914	-0.00163939	0.99634	0.24618	0.161948
TRINITY_DN10267_c1_g1	Thymidylate kinase	-0.391736	0.58988	0.442577	0.510867	0.834313	0.0733603
TRINITY_DN10268_c0_g1	C2 domain-containing protein 3	0.165438	0.376017	0.590662	0.000876049	0.425224	0.00149966
TRINITY_DN10268_c0_g1	C2 domain-containing protein 3 isoform X3	0.165438	0.376017	0.590662	0.000876049	0.425224	0.00149966
TRINITY_DN10268_c0_g2	uncharacterized protein LOC103305703	0.36368	0.459467	-0.295955	0.58414	-0.659635	0.0661848
TRINITY_DN10268_c0_g3	C2 domain-containing protein 3 isoform X3	0.281286	0.495703	0.218263	0.614737	-0.0630236	0.850897
TRINITY_DN10269_c0_g1	ubiquitin carboxyl-terminal hydrolase 15 isoform X9	0.188681	0.742934	-0.155828	0.805481	-0.344509	0.372172
TRINITY_DN10269_c0_g3	Dynein heavy chain 6, axonemal	-0.208683	0.714054	-0.0626843	0.927353	0.145999	0.726582
TRINITY_DN10269_c0_g4	Dynein heavy chain 6, axonemal	-0.196478	0.660586	0.214826	0.618924	0.411304	0.151806
TRINITY_DN1027_c0_g1	---NA---	0.274759	0.660092	0.477584	0.399124	0.202825	0.641508
TRINITY_DN10271_c0_g1	SH3 and PX domain-containing protein 2A	-0.937003	0.396624	-2.51357	0.19522	-1.57657	0.377265
TRINITY_DN10272_c0_g1	Kin of IRRE-like protein 3	-0.0950911	0.83206	0.0238656	0.963641	0.118957	0.692233
TRINITY_DN10275_c0_g2	hypothetical protein XELAEV_18033285mg	-0.182882	0.770484	0.660958	0.145219	0.84384	0.0130746
TRINITY_DN10275_c1_g1	Keratinocyte-associated transmembrane protein 2	0.640865	0.486447	0.137495	0.914171	-0.503371	0.443331
TRINITY_DN10276_c0_g1	kelch-like protein 42	0.0203901	0.976058	0.830496	0.0452819	0.810106	0.010219
TRINITY_DN102766_c0_g2	general transcription factor IIF subunit 1 isoform X2	-0.39109	0.555472	-0.467219	0.507347	-0.0761294	0.905534
TRINITY_DN10277_c0_g1	E3 ubiquitin-protein ligase RNF19B	-0.0265481	0.952841	-0.102557	0.793641	-0.0760088	0.780129
TRINITY_DN10277_c1_g1	UPF0705 protein C11orf49 homolog isoform X2	0.0673552	0.792982	-0.226586	0.297536	-0.293941	0.0644193
TRINITY_DN10277_c4_g1	RNA-directed DNA polymerase from mobile element jockey-like	1.0293	0.23997	0.295355	0.782176	-0.73394	0.161379
TRINITY_DN10279_c0_g1	---NA---	0.338543	0.617151	-0.222122	0.780687	-0.560665	0.226516
TRINITY_DN102792_c0_g1	---NA---	-0.0821587	0.960117	0.0164414	0.992707	0.0986001	0.922294
TRINITY_DN1028_c0_g1	protein FAM178A	-0.246292	0.264564	-0.205603	0.376467	0.0406889	0.840839
TRINITY_DN10280_c0_g1	condensin-2 complex subunit D3	-0.724289	0.086377	-0.456204	0.308624	0.268085	0.455276
TRINITY_DN10282_c0_g1	Zinc finger and BTB domain-containing protein 11	-0.426148	0.00924148	-0.152094	0.383684	0.274054	0.0306391
TRINITY_DN10282_c1_g1	---NA---	-0.0801354	0.828064	-0.00669538	0.988229	0.07344	0.77402
TRINITY_DN10282_c1_g1	huntingtin-interacting protein K	-0.0801354	0.828064	-0.00669538	0.988229	0.07344	0.77402
TRINITY_DN10283_c0_g1	Keratinocyte-associated transmembrane protein 2	0.595801	0.361676	-0.039005	0.968467	-0.634806	0.16969
TRINITY_DN10283_c0_g3	Polymerase delta-interacting protein 3	0.231488	0.743957	0.230754	0.744223	-0.000733702	0.999366
TRINITY_DN10284_c0_g1	---NA---	1.44154	0.527097	-0.237405	0.945893	-1.67895	0.32632
TRINITY_DN10284_c0_g2	endothelial cell-selective adhesion molecule	-0.348256	0.257681	-0.744749	0.0165321	-0.396493	0.108568
TRINITY_DN10284_c0_g2	telomerase reverse transcriptase isoform X3	-0.348256	0.257681	-0.744749	0.0165321	-0.396493	0.108568
TRINITY_DN10284_c0_g3	Tudor domain-containing protein 12	-0.240127	0.59814	-0.901135	0.0313552	-0.661008	0.0476805
TRINITY_DN10285_c0_g1	cleavage and polyadenylation specificity factor subunit 5 isoform X2	-0.00879354	0.990444	0.219527	0.704006	0.228321	0.550507
TRINITY_DN10286_c0_g1	deoxyribonuclease gamma-like	-0.73323	0.109436	-0.682544	0.149519	0.0506865	0.915211
TRINITY_DN10287_c1_g1	ubiquitin-conjugating enzyme E2 L3 isoform X2	0.45323	0.364009	0.687053	0.123165	0.233823	0.468605
TRINITY_DN10288_c0_g2	---NA---	0.932891	0.219147	1.21225	0.0908114	0.279359	0.619403
TRINITY_DN10289_c0_g1	dual specificity protein phosphatase CDC14A isoform X1	0.0433412	0.879141	0.409512	0.0473407	0.366171	0.0202925
TRINITY_DN10289_c0_g1	dual specificity protein phosphatase CDC14A-like	0.0433412	0.879141	0.409512	0.0473407	0.366171	0.0202925
TRINITY_DN10289_c1_g1	---NA---	0.64654	0.326565	-0.00789545	0.994259	-0.654436	0.17383
TRINITY_DN10289_c1_g2	Oxidative stress-induced growth inhibitor 1	1.20926	0.38419	0.406149	0.810621	-0.803109	0.334646
TRINITY_DN10289_c5_g1	Putative palmitoyltransferase ZDHHC11B	0.134799	0.794288	0.356496	0.407786	0.221697	0.487656
TRINITY_DN1029_c0_g1	attractin isoform X1	0.0358029	0.833947	0.225362	0.0855492	0.189559	0.0587059
TRINITY_DN1029_c0_g1	attractin-like	0.0358029	0.833947	0.225362	0.0855492	0.189559	0.0587059
TRINITY_DN1029_c0_g2	---NA---	-0.140743	0.764917	-0.484727	0.246323	-0.343984	0.29075
TRINITY_DN1029_c1_g1	striatin isoform X2	-0.0337093	0.889306	0.172073	0.36422	0.205782	0.132231
TRINITY_DN1029_c2_g1	Utrophin	1.49614	0.528659	1.48338	0.483819	-0.0127668	0.993242
TRINITY_DN1029_c3_g1	transcriptional regulator Kaiso	-0.0946116	0.749419	0.196287	0.448966	0.290899	0.109533
TRINITY_DN10291_c0_g1	membrane-spanning 4-domains subfamily A member 12-like	0.308182	0.621289	0.432949	0.441549	0.124767	0.767449
TRINITY_DN10292_c0_g1	vacuolar protein sorting-associated protein 45	0.0166423	0.962511	-0.254618	0.319461	-0.271261	0.149083
TRINITY_DN10292_c0_g2	vacuolar protein sorting-associated protein 45	0.158175	0.77116	-0.140351	0.809901	-0.298526	0.404125
TRINITY_DN10293_c1_g1	---NA---	0.529072	0.348482	0.138865	0.850932	-0.390207	0.311507
TRINITY_DN10294_c0_g1	hypothetical protein UY3_14140	-0.106822	0.870477	-0.14652	0.824191	-0.039698	0.934814
TRINITY_DN10295_c0_g1	rna-directed dna polymerase from mobile element jockey-like	0.444308	0.68056	-0.172501	0.898795	-0.616809	0.367936
TRINITY_DN10295_c0_g2	rna-directed dna polymerase from mobile element jockey-like	2.70357	0.51439	1.48988	0.729287	-1.2137	0.480154
TRINITY_DN10296_c0_g1	alkylated DNA repair protein alkB homolog 1	-0.136525	0.742506	0.627153	0.0503898	0.763678	0.0025109
TRINITY_DN10296_c1_g1	protein Niban	0.142379	0.858149	-0.36089	0.630703	-0.503268	0.315419
TRINITY_DN10297_c0_g1	pro-neuregulin-4, membrane-bound isoform isoform X1	0.0164374	0.970879	0.342833	0.247119	0.326395	0.132702
TRINITY_DN10298_c0_g1	ORM1-like protein 2	-0.0223645	0.94191	0.137964	0.557522	0.160328	0.326381
TRINITY_DN102980_c0_g1	protein sprouty homolog 3	-0.327353	0.344928	0.07394	0.870825	0.401293	0.108895
TRINITY_DN10299_c1_g1	---NA---	-0.47399	0.431936	1.29856	0.00421853	1.77255	1.38179e-05
TRINITY_DN10299_c2_g2	coiled-coil domain-containing protein 151	0.0974161	0.925796	-1.135	0.243349	-1.23241	0.107518
TRINITY_DN102990_c0_g1	malignant fibrous histiocytoma-amplified sequence 1	0.153443	0.59356	0.152105	0.598869	-0.00133793	0.996554
TRINITY_DN102990_c0_g1	hypothetical protein RLOC_00005870	0.153443	0.59356	0.152105	0.598869	-0.00133793	0.996554
TRINITY_DN103_c0_g2	dynein heavy chain 8, axonemal	1.09589	0.0986494	1.5264	0.0145383	0.430511	0.342809
TRINITY_DN1030_c0_g1	CWF19-like protein 1 isoform X2	0.0116175	0.953854	0.149109	0.287019	0.137492	0.183468
TRINITY_DN103002_c0_g1	zinc finger BED domain-containing protein 1-like	-0.135117	0.75493	0.449829	0.191828	0.584946	0.0233496
TRINITY_DN10301_c0_g2	---NA---	0.272439	0.690193	-0.539955	0.418621	-0.812394	0.0879143
TRINITY_DN10301_c1_g1	Extended synaptotagmin-3	-0.317691	0.316938	-0.626267	0.0465741	-0.308576	0.224381
TRINITY_DN10301_c3_g1	---NA---	0.064298	0.905284	-0.513108	0.231917	-0.577406	0.074755
TRINITY_DN10303_c0_g2	28S ribosomal protein S12, mitochondrial	-0.175004	0.654523	0.261374	0.466334	0.436378	0.0812441
TRINITY_DN10304_c0_g1	TATA-binding protein-associated factor 2N isoform X2	-0.297631	0.668211	-0.345192	0.609142	-0.0475607	0.935562
TRINITY_DN10305_c0_g1	---NA---	0.61159	0.26775	-0.579182	0.389502	-1.19077	0.0145607
TRINITY_DN103058_c0_g3	RNA-directed DNA polymerase from mobile element jockey-like	-0.0550762	0.9426	0.390134	0.460097	0.44521	0.225577
TRINITY_DN10306_c0_g1	---NA---	-0.0102142	0.990278	0.0802003	0.919441	0.0904144	0.857114
TRINITY_DN10306_c3_g2	---NA---	0.773693	0.383927	0.184808	0.877815	-0.588885	0.342473
TRINITY_DN10306_c3_g2	phospholipid hydroperoxide glutathione peroxidase, mitochondrial	0.773693	0.383927	0.184808	0.877815	-0.588885	0.342473
TRINITY_DN10306_c5_g1	---NA---	0.0873825	0.906816	-1.00309	0.131902	-1.09047	0.0411527
TRINITY_DN10307_c0_g1	hypothetical protein UY3_03086, partial	2.41989	0.183107	-0.80782	0.800573	-3.22771	0.087057
TRINITY_DN103089_c0_g1	---NA---	-0.0366696	0.956038	0.224548	0.65919	0.261218	0.446147
TRINITY_DN103089_c1_g1	hypothetical protein DUI87_18316	-0.0197133	0.975373	0.674241	0.0826586	0.693954	0.0187854
TRINITY_DN103089_c2_g1	hypothetical protein N305_11375, partial	-0.0249664	0.970913	-0.707132	0.167351	-0.682165	0.0902603
TRINITY_DN10309_c0_g1	aryl-hydrocarbon-interacting protein-like 1	0.3652	0.567895	-0.212072	0.784663	-0.577272	0.21208
TRINITY_DN1031_c0_g1	chitobiosyldiphosphodolichol beta-mannosyltransferase	0.0998631	0.705963	0.339672	0.121473	0.239809	0.148435
TRINITY_DN10311_c1_g1	phosphatidylinositol-glycan biosynthesis class F protein	0.125863	0.804546	0.258301	0.564918	0.132439	0.69532
TRINITY_DN103122_c0_g1	---NA---	-0.509183	0.211048	-0.821151	0.0507826	-0.311969	0.391321
TRINITY_DN103122_c4_g1	Erythroid differentiation-related factor 1	0.894731	0.141025	-0.773546	0.327008	-1.66828	0.00437202
TRINITY_DN10313_c0_g1	probable E3 ubiquitin-protein ligase HERC4	1.17894	0.367319	-0.885296	0.672959	-2.06424	0.127548
TRINITY_DN10314_c0_g1	thioredoxin-related transmembrane protein 4	-0.154773	0.847027	0.0414847	0.962143	0.196258	0.703544
TRINITY_DN10316_c0_g1	---NA---	0.491526	0.167995	-0.131372	0.777227	-0.622898	0.0238369
TRINITY_DN10317_c0_g1	intercellular adhesion molecule 5	0.263253	0.747846	-1.3613	0.145052	-1.62455	0.0324686
TRINITY_DN103174_c0_g1	dynein heavy chain 8, axonemal	-0.426033	0.250986	-0.655843	0.0792696	-0.229811	0.464899
TRINITY_DN10318_c0_g1	---NA---	0.0915362	0.648824	0.229956	0.186684	0.13842	0.300393
TRINITY_DN10319_c0_g1	---NA---	-0.932168	0.0962638	-0.603975	0.30525	0.328193	0.502802
TRINITY_DN10319_c0_g1	AP-3 complex subunit beta-1	-0.932168	0.0962638	-0.603975	0.30525	0.328193	0.502802
TRINITY_DN10319_c1_g1	ATPase family AAA domain-containing protein 2B	-0.158923	0.795473	0.597994	0.178243	0.756916	0.0207089
TRINITY_DN10319_c2_g1	nuclear valosin-containing protein-like isoform X1	-0.271454	0.183107	0.019518	0.94793	0.290972	0.0609961
TRINITY_DN10319_c2_g2	---NA---	-0.106009	0.774187	0.453951	0.113154	0.55996	0.0108355
TRINITY_DN10319_c3_g1	cleavage and polyadenylation specificity factor subunit 3	-0.12671	0.812173	0.544865	0.171926	0.671575	0.0245967
TRINITY_DN1032_c0_g1	tankyrase-1-like	-0.104628	0.587561	0.239629	0.154969	0.344257	0.00789105
TRINITY_DN1032_c0_g1	tankyrase-1	-0.104628	0.587561	0.239629	0.154969	0.344257	0.00789105
TRINITY_DN1032_c1_g1	rna-directed dna polymerase from mobile element jockey-like	0.092919	0.896751	0.0871724	0.907541	-0.00574658	0.992199
TRINITY_DN1032_c2_g2	rna-directed dna polymerase from mobile element jockey-like	0.12639	0.887118	-0.313723	0.709344	-0.440113	0.43383
TRINITY_DN1032_c6_g1	Rho GTPase-activating protein 42	-0.0375911	0.963217	-0.956583	0.142748	-0.918992	0.0795786
TRINITY_DN103208_c0_g2	T-complex protein 1 subunit theta isoform X2	-0.164829	0.774187	0.100902	0.875418	0.265731	0.474127
TRINITY_DN10321_c0_g1	kinesin-like protein KIF1C	0.185911	0.814115	0.117116	0.893306	-0.0687949	0.904038
TRINITY_DN10322_c0_g1	hypothetical protein UY3_09852	0.528583	0.165475	0.745123	0.0410545	0.21654	0.448165
TRINITY_DN10325_c0_g1	hypothetical protein UY3_13774	0.0651844	0.934646	0.711921	0.163264	0.646737	0.0807953
TRINITY_DN10326_c0_g1	Butyrophilin-like protein 2	-0.314044	0.397505	-0.0417354	0.934445	0.272309	0.324762
TRINITY_DN10326_c0_g2	Phosphoinositide 3-kinase regulatory subunit 4	0.341028	0.0730686	0.374627	0.0462562	0.0335987	0.842664
TRINITY_DN10326_c0_g2	phosphoinositide 3-kinase regulatory subunit 4	0.341028	0.0730686	0.374627	0.0462562	0.0335987	0.842664
TRINITY_DN10327_c0_g3	---NA---	2.0412	0.646299	1.50022	0.714147	-0.540983	0.759724
TRINITY_DN10328_c2_g2	---NA---	0.508494	0.546709	0.625135	0.402686	0.116641	0.831473
TRINITY_DN1033_c0_g1	Zinc finger and SCAN domain-containing protein 20	-0.56859	0.0950188	-0.403256	0.259789	0.165334	0.576648
TRINITY_DN1033_c0_g2	Zinc finger and SCAN domain-containing protein 29	-0.161907	0.787093	-3.17038	0.0106753	-3.00847	0.00734656
TRINITY_DN1033_c0_g3	Zinc finger and SCAN domain-containing protein 20	-0.181364	0.655461	-0.0264049	0.95968	0.154959	0.596863
TRINITY_DN1033_c0_g4	Zinc finger and SCAN domain-containing protein 29	-0.262806	0.416724	-0.958073	0.00337808	-0.695267	0.00788139
TRINITY_DN1033_c0_g5	Zinc finger and SCAN domain-containing protein 20	0.0773669	0.904044	0.162461	0.783574	0.0850941	0.839794
TRINITY_DN1033_c1_g1	transcription factor Sp3 isoform X1	-0.0811942	0.660675	0.157867	0.343576	0.239061	0.0473812
TRINITY_DN1033_c11_g1	---NA---	-0.550077	0.258379	0.0570176	0.932889	0.607094	0.0918914
TRINITY_DN1033_c2_g1	hypothetical protein Y1Q_0006166	-0.206569	0.470963	-0.510177	0.0587324	-0.303608	0.155162
TRINITY_DN1033_c3_g2	malignant fibrous histiocytoma-amplified sequence 1 homolog	0.785374	0.227652	0.00629144	0.995374	-0.779083	0.114069
TRINITY_DN10330_c0_g1	---NA---	-0.424206	0.451721	-0.794857	0.168125	-0.370651	0.448072
TRINITY_DN103320_c0_g2	Leucine-rich repeat-containing protein 49	0.298028	0.584151	0.567913	0.236134	0.269885	0.457666
TRINITY_DN10335_c0_g1	male-specific lethal 3 homolog	0.0818753	0.681514	0.159577	0.375599	0.077702	0.577339
TRINITY_DN10335_c0_g4	---NA---	2.18494	0.440495	-0.638694	0.885924	-2.82364	0.209262
TRINITY_DN103357_c0_g1	solute carrier family 41 member 2	0.207189	0.741456	0.292706	0.620488	0.0855167	0.852429
TRINITY_DN10336_c0_g1	serine/threonine-protein kinase VRK1 isoform X1	0.0861748	0.683548	0.137256	0.483748	0.0510811	0.742731
TRINITY_DN10336_c0_g1	UPF0594 protein C13orf38 like protein	0.0861748	0.683548	0.137256	0.483748	0.0510811	0.742731
TRINITY_DN10336_c1_g1	peripherin-2	-0.955438	0.0620003	-1.35506	0.0213646	-0.399621	0.449762
TRINITY_DN103384_c0_g6	---NA---	0.194891	0.755715	-0.0548492	0.942688	-0.24974	0.550446
TRINITY_DN103398_c0_g1	hypothetical protein DPX16_11563, partial	-0.349706	0.467573	-1.31593	0.0147044	-0.966226	0.0321837
TRINITY_DN1034_c0_g1	tyrosine-protein phosphatase non-receptor type 4 isoform X1	-0.258737	0.287229	0.185582	0.469241	0.444318	0.0144375
TRINITY_DN1034_c0_g3	Cyclic nucleotide-gated cation channel beta-3	0.0885021	0.872947	0.552444	0.17962	0.463942	0.12884
TRINITY_DN1034_c1_g1	---NA---	0.154853	0.842207	-0.19931	0.799614	-0.354163	0.473657
TRINITY_DN10340_c0_g1	ubiquitin carboxyl-terminal hydrolase 21-like	-0.239423	0.941511	-3.06507	0.314331	-2.82564	0.254057
TRINITY_DN10341_c0_g2	leucine zipper protein 1	0.284373	0.360442	-0.219732	0.51917	-0.504105	0.0296881
TRINITY_DN10341_c0_g2	hypothetical protein UY3_11226	0.284373	0.360442	-0.219732	0.51917	-0.504105	0.0296881
TRINITY_DN103413_c0_g2	adenylate cyclase type 3	-0.845252	0.198895	-0.832146	0.247336	0.0131065	0.987345
TRINITY_DN10343_c0_g2	Transcriptional repressor p66-alpha	-0.193786	0.70001	-0.630837	0.161774	-0.437052	0.220285
TRINITY_DN10344_c0_g1	---NA---	0.285231	0.473173	-0.0221835	0.968928	-0.307414	0.285565
TRINITY_DN10345_c1_g1	RNA-directed DNA polymerase from mobile element jockey-like	-0.194779	0.810835	-0.412554	0.589921	-0.217776	0.717235
TRINITY_DN10348_c0_g3	rna-directed dna polymerase from mobile element jockey-like	0.438582	0.508554	0.0224873	0.980731	-0.416095	0.35738
TRINITY_DN10348_c0_g4	RNA-directed DNA polymerase from mobile element jockey-like	-0.291766	0.518507	-0.610847	0.151262	-0.319081	0.353414
TRINITY_DN10349_c3_g3	---NA---	-0.00422826	0.994949	0.439692	0.401529	0.44392	0.236127
TRINITY_DN1035_c0_g1	Brain mitochondrial carrier protein 1	0.593791	0.13594	-0.626716	0.150446	-1.22051	0.000475575
TRINITY_DN1035_c0_g1	brain mitochondrial carrier protein 1 isoform X2	0.593791	0.13594	-0.626716	0.150446	-1.22051	0.000475575
TRINITY_DN1035_c0_g2	---NA---	0.350188	0.357094	-0.613062	0.112767	-0.963251	0.00175644
TRINITY_DN10350_c0_g1	rna-directed dna polymerase from mobile element jockey-like	3.0734	0.0422674	2.14713	0.107051	-0.926266	0.0646779
TRINITY_DN103508_c0_g1	prickle-like protein 1	-0.504658	0.344008	-1.20172	0.0354986	-0.697064	0.143262
TRINITY_DN10353_c0_g1	---NA---	-0.0359857	0.971022	-0.134348	0.878444	-0.0983622	0.863539
TRINITY_DN10353_c1_g1	---NA---	0.644838	0.404102	0.534154	0.488338	-0.110684	0.847401
TRINITY_DN103546_c0_g1	UPF0667 protein C1orf55	-0.912777	0.0403247	-1.13965	0.0239876	-0.226868	0.649216
TRINITY_DN103548_c0_g1	---NA---	-0.0635199	0.896446	-1.07797	0.0131255	-1.01445	0.00537389
TRINITY_DN10355_c0_g1	von Willebrand factor A domain-containing protein 5A	0.589494	0.388106	-0.505609	0.550732	-1.0951	0.0499831
TRINITY_DN10356_c0_g1	WD repeat-containing protein 91	0.371287	0.666006	0.045588	0.967888	-0.325699	0.571669
TRINITY_DN10358_c0_g1	centriole, cilia and spindle-associated protein	-0.440948	0.0605967	-0.45192	0.0590263	-0.0109717	0.964335
TRINITY_DN103583_c1_g1	---NA---	-1.01038	0.307314	1.62745	0.0156069	2.63783	7.68815e-05
TRINITY_DN103592_c0_g1	hypothetical protein UY3_00381	-0.0884849	0.892999	0.129278	0.826565	0.217763	0.551496
TRINITY_DN1036_c0_g1	FRAS1-related extracellular matrix protein 3 isoform A	0.30311	0.285799	-0.195186	0.538884	-0.498296	0.0215746
TRINITY_DN1036_c1_g1	nectin-3 isoform B	0.847983	0.04071	0.0567998	0.928418	-0.791183	0.014361
TRINITY_DN1036_c3_g1	GRAM domain-containing protein 1B	0.173558	0.835922	0.066551	0.944829	-0.107007	0.857074
TRINITY_DN1036_c6_g1	---NA---	0.487395	0.385548	0.0350068	0.965837	-0.452388	0.230156
TRINITY_DN10361_c0_g2	SH2 domain-containing adapter protein D isoform X1	-0.167425	0.702154	-0.531239	0.169049	-0.363814	0.228582
TRINITY_DN10364_c0_g1	protein cbfa2t2	-0.049208	0.86016	0.0494613	0.866181	0.0986693	0.570934
TRINITY_DN10364_c0_g1	---NA---	-0.049208	0.86016	0.0494613	0.866181	0.0986693	0.570934
TRINITY_DN10365_c0_g1	beta-enolase isoform X1	0.0325761	0.976058	-0.481309	0.564801	-0.513885	0.389841
TRINITY_DN10366_c0_g1	C-type lectin domain family 2 member D-like	0.0875234	0.955456	0.0387016	0.980421	-0.0488218	0.95769
TRINITY_DN103664_c0_g1	---NA---	-0.110494	0.817802	-0.766595	0.0551945	-0.656101	0.0392176
TRINITY_DN10367_c0_g1	zinc finger and BTB domain-containing protein 26-like	0.14021	0.759519	0.133645	0.776447	-0.0065654	0.986466
TRINITY_DN10367_c1_g1	---NA---	0.418564	0.446923	-0.788037	0.161774	-1.2066	0.00581359
TRINITY_DN10368_c0_g1	zinc finger protein 501-like	-0.458962	0.350618	-0.341361	0.518749	0.117601	0.787973
TRINITY_DN1037_c0_g1	Neuroblast differentiation-associated protein AHNAK	-0.139303	0.790368	-0.0176315	0.977955	0.121672	0.740834
TRINITY_DN1037_c0_g1	neuroblast differentiation-associated protein AHNAK	-0.139303	0.790368	-0.0176315	0.977955	0.121672	0.740834
TRINITY_DN10370_c0_g2	---NA---	-0.249963	0.692601	-0.627061	0.278211	-0.377098	0.408267
TRINITY_DN10371_c0_g1	DNA-binding protein RFXANK	0.742829	0.192911	0.0292493	0.973724	-0.713579	0.0989749
TRINITY_DN10372_c0_g1	---NA---	-0.153125	0.81645	-0.707617	0.242906	-0.554491	0.250406
TRINITY_DN10373_c0_g1	folylpolyglutamate synthase, mitochondrial isoform X2	-0.0340794	0.93443	-0.595278	0.0465741	-0.561198	0.0177083
TRINITY_DN10373_c0_g3	---NA---	0.0548885	0.937407	-0.495534	0.392015	-0.550422	0.199311
TRINITY_DN10375_c0_g1	---NA---	0.391109	0.5191	0.362922	0.553414	-0.0281871	0.95627
TRINITY_DN10375_c0_g1	Catenin alpha-2	0.391109	0.5191	0.362922	0.553414	-0.0281871	0.95627
TRINITY_DN103751_c0_g1	zinc finger C3H1 domain-containing protein	-0.240567	0.563224	-0.657697	0.0862291	-0.41713	0.172706
TRINITY_DN103755_c0_g1	Ubiquitin carboxyl-terminal hydrolase 37	-0.298252	0.472523	0.133018	0.77174	0.43127	0.129088
TRINITY_DN10376_c0_g1	---NA---	-0.0175964	0.97636	0.212724	0.635904	0.230321	0.455739
TRINITY_DN10377_c0_g1	Dynein heavy chain 8, axonemal	-0.00238914	0.998293	-0.984118	0.249236	-0.981729	0.131184
TRINITY_DN10378_c0_g1	transforming growth factor-beta receptor-associated protein 1 isoform X1	-0.197513	0.329986	0.0609045	0.809186	0.258418	0.0822028
TRINITY_DN10378_c0_g1	transforming growth factor-beta receptor-associated protein 1	-0.197513	0.329986	0.0609045	0.809186	0.258418	0.0822028
TRINITY_DN10378_c0_g3	protein/nucleic acid deglycase DJ-1	0.65334	0.183434	0.800578	0.0797004	0.147238	0.672293
TRINITY_DN103789_c0_g4	sialic acid synthase	-0.139148	0.568154	0.286096	0.179568	0.425244	0.00856819
TRINITY_DN10379_c0_g1	RNA-directed DNA polymerase from mobile element jockey-like	0.280513	0.751079	-1.31902	0.116444	-1.59953	0.0170498
TRINITY_DN1038_c0_g1	E3 ubiquitin-protein ligase TRIM69	0.627748	0.524899	0.557964	0.573441	-0.0697843	0.929297
TRINITY_DN1038_c0_g2	---NA---	1.06297	0.312504	0.628538	0.588377	-0.434431	0.58069
TRINITY_DN10382_c0_g1	C-terminal-binding protein 1	0.650668	0.36469	0.202478	0.822967	-0.44819	0.387594
TRINITY_DN10384_c0_g1	---NA---	-0.205667	0.755313	-0.459889	0.444751	-0.254222	0.589457
TRINITY_DN10385_c0_g1	---NA---	-0.291491	0.393391	-0.592567	0.0731504	-0.301077	0.257858
TRINITY_DN10386_c0_g1	---NA---	0.988948	0.0641159	-0.322054	0.632356	-1.311	0.00317802
TRINITY_DN10386_c0_g2	---NA---	2.09491	0.19928	-0.410708	0.878818	-2.50562	0.0547439
TRINITY_DN10388_c0_g1	FL cytokine receptor	-0.0417805	0.92555	-0.443195	0.178859	-0.401414	0.110426
TRINITY_DN10388_c0_g1	Zinc finger and SCAN domain-containing protein 29	-0.0417805	0.92555	-0.443195	0.178859	-0.401414	0.110426
TRINITY_DN10388_c0_g2	hypothetical protein N309_13326, partial	0.933877	0.264998	0.311122	0.75839	-0.622755	0.244651
TRINITY_DN10388_c2_g2	hypothetical protein UY3_07664	-0.0334517	0.964447	-0.53764	0.347907	-0.504188	0.240545
TRINITY_DN103882_c1_g2	---NA---	-0.542104	0.129256	-0.41326	0.269419	0.128844	0.690947
TRINITY_DN103882_c1_g2	V-set and immunoglobulin domain-containing protein 1	-0.542104	0.129256	-0.41326	0.269419	0.128844	0.690947
TRINITY_DN10389_c1_g1	C-C chemokine receptor type 6	0.282612	0.689585	0.659697	0.273571	0.377084	0.40454
TRINITY_DN103892_c0_g1	---NA---	0.760822	0.183434	0.555161	0.339152	-0.205661	0.615002
TRINITY_DN1039_c0_g1	---NA---	-0.348761	0.327469	0.192153	0.623712	0.540914	0.0370026
TRINITY_DN1039_c0_g1	mitochondrial import receptor subunit TOM7 homolog	-0.348761	0.327469	0.192153	0.623712	0.540914	0.0370026
TRINITY_DN1039_c0_g2	---NA---	0.354923	0.194216	0.353386	0.195576	-0.00153623	0.995997
TRINITY_DN1039_c1_g1	hypothetical protein UY3_12715	0.188073	0.543926	-0.996872	0.00129165	-1.18495	1.13109e-05
TRINITY_DN1039_c2_g1	---NA---	-0.26712	0.559378	-0.70879	0.0960243	-0.44167	0.19509
TRINITY_DN10390_c0_g1	zinc finger protein 830	0.208864	0.719595	-0.214265	0.730228	-0.423129	0.283831
TRINITY_DN103914_c0_g1	---NA---	0.0499094	0.952733	-1.05745	0.139801	-1.10736	0.0540052
TRINITY_DN10392_c0_g1	ADP-ribosylation factor-like protein 13A	0.48673	0.463191	0.0672412	0.941903	-0.419489	0.392202
TRINITY_DN10392_c0_g2	XK-related protein 2	-0.0314274	0.960117	-0.722531	0.107218	-0.691103	0.0477216
TRINITY_DN10394_c0_g1	RNA-directed DNA polymerase from mobile element jockey-like	-0.383268	0.425059	-0.931898	0.0510348	-0.54863	0.156881
TRINITY_DN10394_c1_g2	EVI5-like protein	-1.15855	0.0585799	-1.27491	0.0601465	-0.116361	0.868434
TRINITY_DN10394_c2_g2	---NA---	-0.233469	0.635828	-0.0736422	0.900145	0.159826	0.652083
TRINITY_DN10395_c0_g1	E3 ubiquitin-protein ligase TRIM7 isoform X1	-0.0229077	0.975094	-0.156672	0.800573	-0.133764	0.753584
TRINITY_DN10395_c0_g1	rna-directed dna polymerase from mobile element jockey-like	-0.0229077	0.975094	-0.156672	0.800573	-0.133764	0.753584
TRINITY_DN10395_c0_g2	rna-directed dna polymerase from mobile element jockey-like	0.0565416	0.94221	-0.377619	0.545803	-0.434161	0.328222
TRINITY_DN10395_c0_g3	rna-directed dna polymerase from mobile element jockey-like	0.715259	0.668565	0.593872	0.707219	-0.121387	0.898878
TRINITY_DN10396_c0_g2	Androgen receptor	-0.0199698	0.962914	0.543688	0.0472933	0.563657	0.00754578
TRINITY_DN10396_c0_g4	---NA---	0.0555628	0.948186	-0.253026	0.731753	-0.308589	0.531349
TRINITY_DN10397_c0_g1	---NA---	-0.311202	0.411318	-0.798141	0.0355656	-0.486939	0.11331
TRINITY_DN10397_c0_g2	NADP-dependent malic enzyme	0.735329	0.503884	0.603001	0.575984	-0.132328	0.860432
TRINITY_DN10398_c0_g2	vesicle transport protein SFT2A	-0.18748	0.727169	0.133379	0.818661	0.320859	0.364564
TRINITY_DN10399_c0_g1	---NA---	0.286187	0.717247	-1.54837	0.124998	-1.83455	0.0293788
TRINITY_DN104_c0_g1	protein angel homolog 2	-0.123432	0.575779	0.0626492	0.801866	0.186081	0.216204
TRINITY_DN1040_c0_g1	zinc finger protein Pegasus	-0.0406673	0.892373	0.336036	0.123397	0.376703	0.0230681
TRINITY_DN1040_c1_g1	uncharacterized protein LOC112061307	0.632282	0.0635867	0.173138	0.678653	-0.459143	0.0786715
TRINITY_DN1040_c10_g1	DnaJ like protein subfamily C member 2	1.32395	0.611837	-1.02096	0.800573	-2.34491	0.347698
TRINITY_DN1040_c12_g1	---NA---	0.837253	0.345185	0.59789	0.521278	-0.239363	0.72748
TRINITY_DN1040_c13_g1	interferon-induced protein with tetratricopeptide repeats 5-like	-0.0939353	0.958318	-1.84487	0.195273	-1.75093	0.120326
TRINITY_DN1040_c162_g1	RNA-directed DNA polymerase from mobile element jockey-like	0.898215	0.273582	0.348241	0.718582	-0.549974	0.327977
TRINITY_DN1040_c2_g1	---NA---	0.533727	0.0964934	-0.199294	0.603803	-0.733021	0.00457346
TRINITY_DN1040_c2_g1	E3 ubiquitin-protein ligase TRIM39-like	0.533727	0.0964934	-0.199294	0.603803	-0.733021	0.00457346
TRINITY_DN1040_c3_g1	adaptin ear-binding coat-associated protein 1	0.250796	0.492389	0.0538497	0.911652	-0.196946	0.462322
TRINITY_DN1040_c3_g2	annexin A10	0.308612	0.390404	0.0343126	0.946121	-0.274299	0.304511
TRINITY_DN1040_c4_g1	RNA-directed DNA polymerase from mobile element jockey-like	-0.0316159	0.888301	-0.0207903	0.93291	0.0108256	0.947166
TRINITY_DN1040_c47_g1	Dynein heavy chain 6, axonemal	-0.000690837	0.998972	0.19132	0.632652	0.192011	0.48837
TRINITY_DN1040_c5_g1	Ran GTPase-activating protein 1	-0.11233	0.664505	-0.139281	0.587296	-0.0269506	0.899032
TRINITY_DN1040_c5_g1	ran GTPase-activating protein 1	-0.11233	0.664505	-0.139281	0.587296	-0.0269506	0.899032
TRINITY_DN1040_c8_g1	RNA-directed DNA polymerase from mobile element jockey	-0.147637	0.726384	-0.0733604	0.879953	0.0742763	0.813868
TRINITY_DN1040_c9_g1	---NA---	-0.0290213	0.939213	-0.343912	0.209582	-0.314891	0.129111
TRINITY_DN10401_c0_g1	ankyrin repeat domain-containing protein 22	0.116245	0.873704	0.0724277	0.928114	-0.0438173	0.933696
TRINITY_DN104013_c0_g1	---NA---	0.363976	0.322704	0.699042	0.0402679	0.335066	0.19121
TRINITY_DN10402_c0_g1	protein SMG9 isoform X1	0.204561	0.591207	-1.10478	0.00297945	-1.30934	4.34073e-05
TRINITY_DN10402_c0_g1	---NA---	0.204561	0.591207	-1.10478	0.00297945	-1.30934	4.34073e-05
TRINITY_DN104023_c0_g2	RNA-directed DNA polymerase from mobile element jockey	-0.0449867	0.945922	-0.130477	0.83027	-0.0854908	0.839794
TRINITY_DN10406_c0_g1	---NA---	0.353204	0.655686	0.466729	0.524445	0.113525	0.843127
TRINITY_DN10407_c0_g1	carboxymethylenebutenolidase homolog	-1.28908	0.460264	-0.0665657	0.977198	1.22252	0.345178
TRINITY_DN1041_c0_g1	NF-kappa-B-repressing factor	-0.145642	0.203069	0.0610003	0.64637	0.206643	0.0182242
TRINITY_DN1041_c0_g1	KATNB1-like protein 1	-0.145642	0.203069	0.0610003	0.64637	0.206643	0.0182242
TRINITY_DN1041_c0_g1	bifunctional arginine demethylase and lysyl-hydroxylase JMJD6	-0.145642	0.203069	0.0610003	0.64637	0.206643	0.0182242
TRINITY_DN1041_c1_g1	protein PRR14L isoform X1	-0.0364128	0.883725	0.313356	0.0868614	0.349769	0.013685
TRINITY_DN1041_c2_g1	spatacsin isoform X1	-0.167938	0.380724	-0.0254073	0.923429	0.14253	0.325421
TRINITY_DN1041_c3_g1	---NA---	-0.760062	0.0142094	-0.212014	0.54163	0.548047	0.0254458
TRINITY_DN10410_c1_g2	protein ANTAGONIST OF LIKE HETEROCHROMATIN PROTEIN 1-like	-0.361664	0.347271	-0.666594	0.0919946	-0.304931	0.358102
TRINITY_DN10413_c0_g1	protein GPR107	-0.0931282	0.924557	0.00117652	0.999229	0.0943047	0.885958
TRINITY_DN10413_c1_g1	caspase-6 isoform X2	-0.105683	0.714076	0.2789	0.255441	0.384582	0.0329786
TRINITY_DN10413_c5_g1	---NA---	-0.486816	0.37007	0.599514	0.191161	1.08633	0.00335904
TRINITY_DN104140_c0_g1	---NA---	0.166463	0.841438	0.0379881	0.969218	-0.128475	0.821405
TRINITY_DN10415_c0_g1	poly [ADP-ribose] polymerase 6 isoform X1	-0.605856	0.61052	-0.267603	0.840646	0.338254	0.699042
TRINITY_DN10415_c0_g1	Poly [ADP-ribose] polymerase 6	-0.605856	0.61052	-0.267603	0.840646	0.338254	0.699042
TRINITY_DN104159_c1_g1	cathepsin Z	0.160132	0.81645	-0.521582	0.430268	-0.681714	0.150688
TRINITY_DN10416_c1_g2	coatomer subunit beta	0.659621	0.0702069	0.865043	0.0149306	0.205422	0.455272
TRINITY_DN104168_c1_g1	---NA---	0.514831	0.401122	-0.161571	0.846657	-0.676402	0.138927
TRINITY_DN10417_c0_g1	protein FAM72A	-0.0690596	0.845898	0.292964	0.29058	0.362024	0.0710214
TRINITY_DN10417_c0_g1	protein FAM72A isoform X1	-0.0690596	0.845898	0.292964	0.29058	0.362024	0.0710214
TRINITY_DN10418_c0_g1	muscleblind-like protein 1	0.176572	0.659239	0.621803	0.0586339	0.445231	0.0719777
TRINITY_DN10419_c0_g1	Leucine-rich repeat-containing protein 49	-0.140684	0.801842	-0.368012	0.462606	-0.227328	0.561043
TRINITY_DN1042_c0_g1	Ras-related C3 botulinum toxin substrate 2	-0.0204891	0.957914	-0.156795	0.606914	-0.136306	0.531773
TRINITY_DN1042_c0_g2	ras-related C3 botulinum toxin substrate 1	-0.141494	0.524614	0.140642	0.526963	0.282135	0.0643612
TRINITY_DN10424_c0_g1	E3 ubiquitin-protein ligase HECTD1 isoform X5	0.0411095	0.928403	-0.126061	0.757503	-0.16717	0.533233
TRINITY_DN10426_c0_g1	zinc finger protein 70-like	0.15102	0.720983	-0.440337	0.245046	-0.591357	0.0356012
TRINITY_DN1043_c0_g1	cytochrome b5 reductase 4 isoform X1	-0.389986	0.0227872	0.0850524	0.669011	0.475039	0.000539609
TRINITY_DN1043_c1_g1	SH3 domain-containing protein 19	0.187161	0.835524	0.247385	0.779677	0.0602243	0.926447
TRINITY_DN1043_c1_g1	---NA---	0.187161	0.835524	0.247385	0.779677	0.0602243	0.926447
TRINITY_DN104301_c0_g1	---NA---	-0.203869	0.703141	-1.56802	0.0178131	-1.36415	0.0163844
TRINITY_DN104301_c0_g1	Zinc finger and SCAN domain-containing protein 29	-0.203869	0.703141	-1.56802	0.0178131	-1.36415	0.0163844
TRINITY_DN10431_c0_g1	---NA---	1.47062	0.619482	-0.84758	0.848441	-2.3182	0.353682
TRINITY_DN10432_c0_g1	---NA---	-0.348014	0.483951	-0.679531	0.160084	-0.331517	0.406296
TRINITY_DN104333_c0_g1	---NA---	0.50321	0.380025	0.181331	0.796663	-0.321879	0.448398
TRINITY_DN10434_c0_g1	RAS protein activator like-3	0.0306799	0.960117	-0.333562	0.476756	-0.364242	0.278378
TRINITY_DN10434_c1_g1	RAS protein activator like-3	0.10021	0.842519	0.1826	0.690732	0.0823905	0.807546
TRINITY_DN10435_c0_g1	SH2 domain-containing protein 4B	-0.244822	0.444082	-0.0894939	0.818119	0.155329	0.528715
TRINITY_DN104352_c0_g2	---NA---	0.362085	0.549436	1.04156	0.0246847	0.679479	0.0277457
TRINITY_DN104357_c0_g1	mediator of RNA polymerase II transcription subunit 12	0.0684089	0.884647	-0.283057	0.479388	-0.351465	0.218106
TRINITY_DN10436_c0_g1	hypothetical protein ASZ78_015058	0.0928153	0.932919	0.383859	0.645745	0.291044	0.607353
TRINITY_DN10436_c0_g1	Tyrosine-protein phosphatase non-receptor type 4	0.0928153	0.932919	0.383859	0.645745	0.291044	0.607353
TRINITY_DN10437_c0_g1	---NA---	-0.0323483	0.931581	-0.315009	0.260435	-0.282661	0.177988
TRINITY_DN10438_c1_g1	beta-1,3-galactosyltransferase 2	-0.0683814	0.911457	0.56188	0.192587	0.630262	0.0480297
TRINITY_DN1044_c0_g1	splicing factor, proline- and glutamine-rich isoform X2	0.0797659	0.661888	-0.160026	0.339307	-0.239792	0.0483916
TRINITY_DN1044_c0_g1	splicing factor, proline- and glutamine-rich isoform X1	0.0797659	0.661888	-0.160026	0.339307	-0.239792	0.0483916
TRINITY_DN10440_c0_g1	hydroxyacylglutathione hydrolase-like protein isoform X5	-0.137665	0.853887	-0.546673	0.388482	-0.409008	0.397033
TRINITY_DN10441_c0_g1	---NA---	-0.328568	0.575304	0.110037	0.871324	0.438605	0.258779
TRINITY_DN10444_c0_g1	suppressor of fused homolog isoform X2	0.00446314	0.981709	0.113399	0.419535	0.108936	0.281636
TRINITY_DN10444_c1_g1	WD repeat and FYVE domain-containing protein 2	0.282064	0.292295	-0.177469	0.558696	-0.459534	0.0243909
TRINITY_DN10444_c1_g1	WD repeat and FYVE domain-containing protein 2 isoform X1	0.282064	0.292295	-0.177469	0.558696	-0.459534	0.0243909
TRINITY_DN10444_c2_g1	bolA-like protein 1	0.0357299	0.956264	-0.365663	0.477304	-0.401393	0.284855
TRINITY_DN10444_c3_g1	---NA---	-0.114436	0.782971	-0.18892	0.629121	-0.0744843	0.808777
TRINITY_DN10445_c0_g1	butyrophilin subfamily 1 member A1-like	1.68042	0.0387168	1.20717	0.126832	-0.473245	0.372803
TRINITY_DN10446_c0_g1	---NA---	-0.145594	0.757905	0.031002	0.957257	0.176596	0.57937
TRINITY_DN104469_c0_g1	beta-1,3-N-acetylglucosaminyltransferase radical fringe	-0.01295	0.952389	-0.0786755	0.648737	-0.0657255	0.593367
TRINITY_DN10448_c0_g1	rna-directed dna polymerase from mobile element jockey-like	0.766595	0.285799	0.932689	0.165929	0.166095	0.753423
TRINITY_DN10449_c0_g1	origin recognition complex subunit 3 isoform X2	-0.0669459	0.847551	0.246194	0.374848	0.313139	0.113662
TRINITY_DN10449_c0_g3	origin recognition complex subunit 3 isoform X1	0.0446826	0.896751	0.377166	0.124091	0.332484	0.070211
TRINITY_DN10449_c1_g1	origin recognition complex subunit 1 isoform X1	-0.164461	0.687888	-0.372475	0.317231	-0.208015	0.477317
TRINITY_DN1045_c0_g1	---NA---	0.157794	0.6632	-0.900131	0.00673654	-1.05793	0.000157577
TRINITY_DN1045_c0_g1	mediator of RNA polymerase II transcription subunit 25 isoform X1	0.157794	0.6632	-0.900131	0.00673654	-1.05793	0.000157577
TRINITY_DN1045_c0_g1	mediator of RNA polymerase II transcription subunit 25 isoform X2	0.157794	0.6632	-0.900131	0.00673654	-1.05793	0.000157577
TRINITY_DN1045_c1_g1	Docking protein 3	0.0146002	0.972029	-0.36684	0.198117	-0.38144	0.0765571
TRINITY_DN1045_c1_g1	probable ATP-dependent RNA helicase DDX41	0.0146002	0.972029	-0.36684	0.198117	-0.38144	0.0765571
TRINITY_DN1045_c2_g1	RNA-directed DNA polymerase from mobile element jockey-like	0.60868	0.180427	0.212579	0.69446	-0.396101	0.209492
TRINITY_DN1045_c3_g1	hypothetical protein UY3_18533	0.265879	0.585522	0.034649	0.957743	-0.23123	0.504139
TRINITY_DN1045_c5_g1	hypothetical protein UY3_18533	0.0874246	0.852936	0.594749	0.081767	0.507324	0.045985
TRINITY_DN10450_c0_g1	cAMP-dependent protein kinase catalytic subunit PRKX	0.264039	0.540249	0.0851573	0.876521	-0.178881	0.572713
TRINITY_DN10451_c0_g1	cysteine-rich and transmembrane domain-containing protein 1	-0.0914555	0.793511	0.198965	0.508686	0.29042	0.161885
TRINITY_DN104512_c0_g1	---NA---	0.0915637	0.8663	0.331312	0.447194	0.239748	0.448088
TRINITY_DN10452_c0_g1	---NA---	0.0808352	0.867762	-0.0341503	0.950069	-0.114985	0.720172
TRINITY_DN10454_c0_g2	secretion-regulating guanine nucleotide exchange factor	-0.126977	0.739535	0.366188	0.242194	0.493165	0.0317922
TRINITY_DN10455_c0_g1	cilia- and flagella-associated protein 53	-0.204243	0.624447	0.110653	0.812515	0.314896	0.261152
TRINITY_DN10456_c0_g1	RUN and FYVE domain-containing protein 1 isoform X2	-0.235919	0.516993	-0.563606	0.0950597	-0.327688	0.222434
TRINITY_DN10457_c0_g1	histone H1-like	0.795894	0.323274	-0.386307	0.705136	-1.1822	0.0626279
TRINITY_DN10457_c0_g1	---NA---	0.795894	0.323274	-0.386307	0.705136	-1.1822	0.0626279
TRINITY_DN10458_c0_g1	---NA---	0.0753214	0.958344	-0.71822	0.581137	-0.793542	0.380873
TRINITY_DN1046_c0_g1	lysosomal amino acid transporter 1 homolog	0.233392	0.371424	0.521509	0.0300915	0.288117	0.113331
TRINITY_DN1046_c0_g1	---NA---	0.233392	0.371424	0.521509	0.0300915	0.288117	0.113331
TRINITY_DN1046_c1_g1	STE20-related kinase adapter protein alpha isoform X1	-0.384529	0.119915	-0.249175	0.344333	0.135354	0.517119
TRINITY_DN10460_c0_g1	proteasome subunit beta type-7	-0.322881	0.686139	-0.534769	0.483748	-0.211888	0.73538
TRINITY_DN10461_c0_g1	cilia- and flagella-associated protein 65	0.272071	0.739626	-0.0733302	0.944202	-0.345401	0.540075
TRINITY_DN10462_c0_g1	---NA---	1.30257	0.532079	-1.88728	0.595558	-3.18985	0.206137
TRINITY_DN104636_c1_g1	ubiquitin carboxyl-terminal hydrolase 47-like	0.712261	0.265366	0.584963	0.346999	-0.127298	0.769965
TRINITY_DN10464_c0_g1	Transposon Ty3-G Gag-Pol poly	-0.217894	0.245046	0.141365	0.47945	0.359259	0.0110639
TRINITY_DN10464_c0_g1	heat shock protein 75 kDa, mitochondrial	-0.217894	0.245046	0.141365	0.47945	0.359259	0.0110639
TRINITY_DN10464_c0_g2	Major facilitator superfamily domain-containing protein 2B	-0.248525	0.571641	-0.192394	0.680141	0.0561317	0.879541
TRINITY_DN104645_c0_g1	---NA---	0.582371	0.254008	0.0928921	0.89839	-0.489479	0.203763
TRINITY_DN104648_c0_g1	Leucine-rich PPR motif-containing protein	0.13643	0.842776	0.635243	0.190611	0.498813	0.136662
TRINITY_DN10465_c0_g1	immunoglobulin lambda light chain variable region	-0.449299	0.490083	0.610969	0.298419	1.06027	0.0150684
TRINITY_DN10465_c0_g1	immunoglobulin light chain variable region	-0.449299	0.490083	0.610969	0.298419	1.06027	0.0150684
TRINITY_DN10465_c1_g1	Immunoglobulin lambda-like polypeptide 5	-0.148178	0.821872	0.0430835	0.954603	0.191262	0.660463
TRINITY_DN104659_c0_g4	solute carrier family 7 member 13-like	-0.169504	0.594434	-0.180804	0.571174	-0.0112997	0.967962
TRINITY_DN104659_c0_g4	microtubule-associated protein RP/EB family member 2 isoform X1	-0.169504	0.594434	-0.180804	0.571174	-0.0112997	0.967962
TRINITY_DN10466_c0_g1	transmembrane protein 135 isoform X1	-0.0671421	0.853108	0.215159	0.468444	0.282301	0.174639
TRINITY_DN10466_c0_g1	transmembrane protein 135	-0.0671421	0.853108	0.215159	0.468444	0.282301	0.174639
TRINITY_DN104673_c0_g1	---NA---	-0.0735731	0.866201	-0.141768	0.729966	-0.0681945	0.822697
TRINITY_DN1047_c0_g1	3-hydroxyisobutyryl-CoA hydrolase	-0.382457	0.51855	-0.547283	0.344115	-0.164826	0.738032
TRINITY_DN1047_c0_g2	---NA---	-0.492408	0.319616	-0.353934	0.506676	0.138474	0.750765
TRINITY_DN1047_c0_g3	---NA---	-0.531734	0.368592	-0.181022	0.800641	0.350713	0.445183
TRINITY_DN10470_c0_g1	secretory carrier-associated membrane protein 1	-0.0419343	0.859092	0.151363	0.43348	0.193298	0.156881
TRINITY_DN10470_c0_g1	adaptin ear-binding coat-associated protein 1	-0.0419343	0.859092	0.151363	0.43348	0.193298	0.156881
TRINITY_DN10470_c1_g1	zinc finger BED domain-containing 5-like protein	0.486024	0.128392	0.608779	0.049197	0.122754	0.627852
TRINITY_DN10471_c2_g1	hypothetical protein N320_01758, partial	0.464766	0.550004	0.209605	0.817655	-0.255161	0.637954
TRINITY_DN10475_c0_g1	prosaposin isoform X1	0.207184	0.516331	-0.0110706	0.980421	-0.218255	0.341965
TRINITY_DN10477_c0_g1	---NA---	-0.110992	0.895079	-0.528011	0.47826	-0.417019	0.472643
TRINITY_DN10478_c0_g1	probable methyltransferase TARBP1	0.370725	0.474772	0.89535	0.036451	0.524626	0.0636048
TRINITY_DN1048_c0_g1	RAD51-associated protein 1	0.194761	0.383159	0.421671	0.0429844	0.22691	0.156147
TRINITY_DN1048_c0_g1	protein ANTAGONIST OF LIKE HETEROCHROMATIN PROTEIN 1-like	0.194761	0.383159	0.421671	0.0429844	0.22691	0.156147
TRINITY_DN1048_c1_g1	rna-directed dna polymerase from mobile element jockey-like	-0.141747	0.779333	-0.301677	0.509725	-0.15993	0.651741
TRINITY_DN1048_c1_g2	putative nuclease HARBI1 isoform X1	-0.222058	0.689696	-0.440717	0.420162	-0.218659	0.61996
TRINITY_DN1048_c2_g1	PH domain leucine-rich repeat-containing protein phosphatase 2 isoform X1	-0.289132	0.295076	0.00420305	0.992308	0.293335	0.154136
TRINITY_DN1048_c2_g1	PH domain leucine-rich repeat-containing protein phosphatase 2	-0.289132	0.295076	0.00420305	0.992308	0.293335	0.154136
TRINITY_DN1048_c3_g1	ubiquitin-like-conjugating enzyme ATG3	0.233714	0.725635	-0.184839	0.805596	-0.418552	0.355662
TRINITY_DN1048_c4_g1	putative nuclease HARBI1 isoform X1	0.00524883	0.993555	-0.261519	0.652524	-0.266768	0.510421
TRINITY_DN10480_c0_g6	---NA---	0.331374	0.408167	0.344411	0.377279	0.0130373	0.969297
TRINITY_DN10481_c1_g1	---NA---	0.00725659	0.994781	-0.0783258	0.94888	-0.0855824	0.91349
TRINITY_DN10482_c0_g1	claudin-5	0.162995	0.775952	0.445198	0.343104	0.282203	0.416943
TRINITY_DN10483_c0_g1	zinc finger and BTB domain-containing protein 6	-0.20543	0.285766	0.051563	0.834372	0.256993	0.0711199
TRINITY_DN10484_c0_g1	---NA---	0.491397	0.207513	-0.126221	0.806632	-0.617618	0.0383893
TRINITY_DN10485_c1_g1	meiosis 1 arrest protein	0.450883	0.386882	-0.221228	0.732854	-0.672111	0.0853123
TRINITY_DN10488_c0_g1	---NA---	-1.05302	0.248192	-0.600731	0.544054	0.452289	0.575889
TRINITY_DN104880_c0_g1	---NA---	0.0635044	0.941511	0.118865	0.885426	0.055361	0.920993
TRINITY_DN10489_c0_g2	PR domain zinc finger protein 16 isoform X5	0.0868084	0.931265	-1.25163	0.226451	-1.33844	0.108369
TRINITY_DN1049_c0_g1	katanin p80 WD40 repeat-containing subunit B1	-0.144711	0.607563	-0.643342	0.0104382	-0.49863	0.0119614
TRINITY_DN1049_c0_g1	aladin isoform X2	-0.144711	0.607563	-0.643342	0.0104382	-0.49863	0.0119614
TRINITY_DN1049_c1_g1	prolyl 3-hydroxylase 1	0.64213	0.156745	0.16635	0.775367	-0.47578	0.165654
TRINITY_DN1049_c5_g1	---NA---	-0.380883	0.318483	-0.0142597	0.979867	0.366623	0.199311
TRINITY_DN10490_c0_g1	---NA---	0.28573	0.712619	0.238132	0.767937	-0.0475977	0.935123
TRINITY_DN10494_c0_g1	---NA---	0.17325	0.773951	0.217126	0.711287	0.0438757	0.922718
TRINITY_DN10494_c1_g1	---NA---	-0.0100126	0.990103	-1.28022	0.062188	-1.27021	0.0258734
TRINITY_DN10494_c2_g1	---NA---	0.31128	0.539747	0.355271	0.458532	0.0439906	0.909134
TRINITY_DN10494_c3_g1	---NA---	1.55554	0.168517	-0.225637	0.906281	-1.78118	0.0637026
TRINITY_DN10495_c1_g1	Lysocardiolipin acyltransferase 1	-0.151395	0.850255	-0.631882	0.401193	-0.480487	0.411593
TRINITY_DN104951_c0_g1	---NA---	0.289008	0.689356	0.558502	0.347313	0.269494	0.504999
TRINITY_DN104953_c0_g1	potassium channel subfamily K member 1	-0.320684	0.681537	-0.202765	0.812071	0.117919	0.849003
TRINITY_DN10496_c0_g1	RNA-directed DNA polymerase from mobile element jockey	-0.21065	0.572781	0.288473	0.406096	0.499123	0.0427547
TRINITY_DN10496_c0_g3	Poly(U)-specific endoribonuclease-C	0.25466	0.575997	-0.0245018	0.968708	-0.279162	0.385213
TRINITY_DN10498_c0_g1	proteasome assembly chaperone 2 isoform X2	0.051649	0.91132	0.117593	0.77906	0.0659444	0.823672
TRINITY_DN10499_c0_g1	protein ANTAGONIST OF LIKE HETEROCHROMATIN PROTEIN 1-like	-0.174115	0.830717	-0.408724	0.578858	-0.234609	0.676803
TRINITY_DN10499_c0_g1	GC-rich sequence DNA-binding factor 2	-0.174115	0.830717	-0.408724	0.578858	-0.234609	0.676803
TRINITY_DN10499_c0_g2	protein ANTAGONIST OF LIKE HETEROCHROMATIN PROTEIN 1-like	-0.275968	0.705514	-0.401656	0.560053	-0.125688	0.826446
TRINITY_DN105_c0_g1	spermidine synthase	-0.18526	0.620673	-1.02743	0.00278664	-0.84217	0.00222581
TRINITY_DN105_c0_g1	Spermidine synthase	-0.18526	0.620673	-1.02743	0.00278664	-0.84217	0.00222581
TRINITY_DN105_c0_g2	spermidine synthase	0.0101577	0.991091	-1.47762	0.0783806	-1.48778	0.0327345
TRINITY_DN105_c1_g1	early endosome antigen 1	0.0304949	0.95351	0.218108	0.584021	0.187613	0.506638
TRINITY_DN105_c1_g1	early endosome antigen 1 isoform X1	0.0304949	0.95351	0.218108	0.584021	0.187613	0.506638
TRINITY_DN105_c1_g2	early endosome antigen 1 isoform X1	-0.224062	0.59356	0.0383871	0.942842	0.262449	0.365385
TRINITY_DN105_c2_g1	---NA---	0.863438	0.163342	0.113048	0.898795	-0.75039	0.0855947
TRINITY_DN1050_c0_g1	bromodomain-containing protein 4 isoform X1	0.103858	0.73277	-0.141077	0.636222	-0.244934	0.217388
TRINITY_DN1050_c0_g1	Pentatricopeptide repeat-containing protein 2	0.103858	0.73277	-0.141077	0.636222	-0.244934	0.217388
TRINITY_DN1050_c1_g1	Enoyl-CoA hydratase domain-containing protein 2	0.241222	0.650944	0.328066	0.513668	0.0868435	0.829428
TRINITY_DN1050_c30_g1	mannosyl-oligosaccharide 1,2-alpha-mannosidase IC	0.0694253	0.928895	-0.0640022	0.936588	-0.133428	0.779663
TRINITY_DN1050_c6_g2	coiled-coil and C2 domain-containing protein 2A	0.340079	0.417566	0.271031	0.535405	-0.0690475	0.843796
TRINITY_DN10501_c0_g1	---NA---	0.190328	0.777543	1.18925	0.0169239	0.998922	0.00746384
TRINITY_DN10504_c0_g1	inositol hexakisphosphate kinase 3 isoform X1	-0.617819	0.166469	-0.0252669	0.969169	0.592552	0.0802161
TRINITY_DN10504_c3_g1	Gamma-aminobutyric acid type B receptor subunit 2	0.112202	0.849026	0.20079	0.706928	0.0885882	0.819915
TRINITY_DN10505_c0_g1	C4b-binding protein alpha chain-like	-1.31047	0.162716	-1.62932	0.122447	-0.31885	0.769459
TRINITY_DN10508_c0_g1	---NA---	0.24339	0.605043	-0.3457	0.45623	-0.58909	0.0692451
TRINITY_DN10508_c0_g1	Putative ATP-dependent RNA helicase DDX10	0.24339	0.605043	-0.3457	0.45623	-0.58909	0.0692451
TRINITY_DN10508_c4_g1	---NA---	-0.0986563	0.907467	-0.327518	0.653959	-0.228862	0.674745
TRINITY_DN1051_c0_g1	dnaJ homolog subfamily C member 7	-0.190963	0.195106	-0.0470759	0.803972	0.143887	0.208515
TRINITY_DN1051_c0_g1	dnaJ homolog subfamily C member 7 isoform X2	-0.190963	0.195106	-0.0470759	0.803972	0.143887	0.208515
TRINITY_DN10511_c0_g1	---NA---	0.0220094	0.980864	-1.27874	0.112947	-1.30075	0.0476805
TRINITY_DN10512_c0_g1	SPRY domain-containing SOCS box protein 1	0.199851	0.715292	0.0628506	0.924949	-0.137	0.731404
TRINITY_DN10514_c0_g1	---NA---	0.365349	0.246838	0.471829	0.121988	0.106479	0.674358
TRINITY_DN105148_c0_g2	---NA---	-0.300494	0.564255	-0.805856	0.129241	-0.505362	0.253579
TRINITY_DN105148_c1_g1	centriolin isoform X1	-0.956803	0.172979	-0.455605	0.559414	0.501199	0.388041
TRINITY_DN10518_c2_g1	uncharacterized protein LOC102453510 isoform X1	0.337686	0.626315	0.520655	0.396052	0.182969	0.687544
TRINITY_DN105187_c0_g1	protein regulator of cytokinesis 1-like	0.244666	0.72967	0.0280475	0.975077	-0.216619	0.649249
TRINITY_DN1052_c0_g1	pre-mRNA-splicing factor SYF1	-0.0262854	0.951524	-0.505317	0.0932433	-0.479032	0.0406547
TRINITY_DN1052_c0_g1	---NA---	-0.0262854	0.951524	-0.505317	0.0932433	-0.479032	0.0406547
TRINITY_DN10521_c0_g1	---NA---	-0.406324	0.55199	0.740031	0.184557	1.14635	0.0079621
TRINITY_DN10521_c1_g1	uncharacterized protein KIAA1841 homolog	-0.203747	0.605694	-0.262603	0.495522	-0.058856	0.857331
TRINITY_DN105219_c0_g1	---NA---	-0.152538	0.835922	0.667934	0.178803	0.820472	0.0278619
TRINITY_DN10523_c0_g1	protein jagunal homolog 1	-0.0843754	0.803185	-0.395844	0.154246	-0.311469	0.146167
TRINITY_DN10524_c1_g1	zinc finger protein 3-like	-0.221812	0.4336	-0.0513179	0.889936	0.170494	0.423424
TRINITY_DN10524_c1_g1	zinc finger protein 501-like isoform X1	-0.221812	0.4336	-0.0513179	0.889936	0.170494	0.423424
TRINITY_DN10526_c0_g1	---NA---	0.38172	0.604771	0.0562437	0.9534	-0.325476	0.529971
TRINITY_DN10526_c0_g2	---NA---	-0.153087	0.810424	-0.0124378	0.987252	0.140649	0.746849
TRINITY_DN10527_c0_g1	neurofilament heavy polypeptide-like	0.776775	0.163992	0.368441	0.555145	-0.408334	0.322841
TRINITY_DN10528_c0_g1	ubiquitin-conjugating enzyme E2 variant 3 isoform X3	0.255327	0.630022	-0.252111	0.661527	-0.507438	0.170831
TRINITY_DN1053_c0_g1	caspase recruitment domain-containing protein 8	0.143399	0.659239	-0.176466	0.586834	-0.319865	0.141532
TRINITY_DN1053_c0_g1	caspase recruitment domain-containing protein 8-like	0.143399	0.659239	-0.176466	0.586834	-0.319865	0.141532
TRINITY_DN1053_c0_g4	poly(A)-specific ribonuclease PARN	0.0244931	0.922172	0.318449	0.0662806	0.293956	0.0265302
TRINITY_DN1053_c0_g4	poly(A)-specific ribonuclease PARN isoform X1	0.0244931	0.922172	0.318449	0.0662806	0.293956	0.0265302
TRINITY_DN1053_c0_g5	poly(A)-specific ribonuclease PARN isoform X1	0.323091	0.550609	0.5293	0.270445	0.206209	0.567238
TRINITY_DN105300_c0_g1	---NA---	-0.0257677	0.956114	0.352707	0.272437	0.378475	0.107226
TRINITY_DN10533_c0_g1	integrin alpha-D-like	0.220572	0.729708	-0.501905	0.44717	-0.722477	0.130595
TRINITY_DN10534_c0_g1	ATP-dependent Clp protease ATP-binding subunit clpX-like, mitochondrial	-0.0651085	0.92813	0.508347	0.288008	0.573455	0.0882008
TRINITY_DN105359_c0_g1	WW domain binding protein 1-like isoform X3	0.172292	0.833767	0.410728	0.543108	0.238436	0.611429
TRINITY_DN105359_c0_g2	WW domain binding protein 1-like isoform X4	0.356317	0.563516	0.313479	0.611982	-0.0428379	0.928557
TRINITY_DN10536_c0_g1	---NA---	1.28006	0.209856	0.0616784	0.970812	-1.21838	0.0978948
TRINITY_DN10536_c2_g1	---NA---	0.73511	0.309383	-0.90096	0.343836	-1.63607	0.0190121
TRINITY_DN105382_c0_g1	---NA---	0.597602	0.280752	0.540331	0.321552	-0.0572714	0.897512
TRINITY_DN1054_c0_g1	DNA repair protein complementing XP-C cells isoform X2	0.0998695	0.59147	0.0822857	0.673291	-0.0175837	0.909937
TRINITY_DN1054_c0_g2	DNA repair protein complementing XP-C cells	0.549235	0.213646	-0.104093	0.868322	-0.653328	0.052896
TRINITY_DN1054_c1_g1	fructose-2,6-bisphosphatase TIGAR	-0.298843	0.295582	0.209628	0.479898	0.50847	0.0151208
TRINITY_DN10541_c1_g1	Phosphatidylinositol-5-phosphate 4-kinase type-2 alpha	-0.412631	0.442266	0.1424	0.809877	0.555031	0.118675
TRINITY_DN10542_c0_g1	---NA---	0.430138	0.57442	-1.20536	0.209036	-1.6355	0.033262
TRINITY_DN10542_c0_g1	Protein NEDD1	0.430138	0.57442	-1.20536	0.209036	-1.6355	0.033262
TRINITY_DN10543_c0_g1	Zinc finger and SCAN domain-containing protein 29	-0.184883	0.865724	-0.344462	0.743916	-0.15958	0.842869
TRINITY_DN10544_c0_g1	SAM domain-containing protein SAMSN-1	0.312055	0.384287	0.302175	0.406149	-0.00988045	0.976477
TRINITY_DN10544_c0_g2	Myosin-Va	0.24566	0.673231	0.315647	0.568159	0.0699868	0.874391
TRINITY_DN10544_c2_g2	TBC1 domain family member 9	-0.00611594	0.992196	0.468152	0.289717	0.474268	0.138271
TRINITY_DN10545_c0_g1	zinc finger BED domain-containing protein 5-like	-0.320315	0.533932	-0.0088562	0.990483	0.311459	0.403132
TRINITY_DN10547_c0_g1	neuroblast differentiation-associated protein AHNAK	0.333443	0.719841	0.206134	0.843145	-0.127309	0.855197
TRINITY_DN10547_c0_g1	neuroblast differentiation-associated protein AHNAK isoform X1	0.333443	0.719841	0.206134	0.843145	-0.127309	0.855197
TRINITY_DN10548_c0_g1	---NA---	0.0698289	0.941704	-0.72127	0.403574	-0.791099	0.229616
TRINITY_DN105496_c0_g1	---NA---	-0.61786	0.156745	-0.292043	0.526351	0.325817	0.347415
TRINITY_DN1055_c0_g1	pentatricopeptide repeat-containing protein 1, mitochondrial	-0.162343	0.378636	-0.358994	0.0424968	-0.196651	0.158344
TRINITY_DN1055_c1_g1	GTP-binding protein REM 1	0.0899979	0.866158	-0.0150459	0.980736	-0.105044	0.768365
TRINITY_DN10550_c0_g1	---NA---	-0.277096	0.166317	-0.176408	0.410101	0.100688	0.54491
TRINITY_DN10550_c3_g1	mitochondrial fission process protein 1	0.756751	0.27564	-0.264711	0.792607	-1.02146	0.0734453
TRINITY_DN10553_c0_g1	N-alpha-acetyltransferase 20	-0.116693	0.760695	0.142527	0.705192	0.259219	0.286767
TRINITY_DN105553_c0_g2	cortexin-3-like	0.178344	0.820651	0.262177	0.709196	0.0838334	0.8648
TRINITY_DN10556_c2_g1	Collagen alpha-1(XVII) chain	0.33929	0.451609	0.057958	0.924702	-0.281332	0.398778
TRINITY_DN10557_c0_g1	Tetratricopeptide repeat protein 38	-0.680877	0.245039	-2.90456	0.0121023	-2.22368	0.0304227
TRINITY_DN10558_c0_g1	vesicle-fusing ATPase-like	-0.277844	0.11914	0.223766	0.21409	0.50161	0.000455436
TRINITY_DN10558_c0_g1	vesicle-fusing ATPase isoform X1	-0.277844	0.11914	0.223766	0.21409	0.50161	0.000455436
TRINITY_DN10558_c0_g2	hypothetical protein UY3_07110	0.0476252	0.938883	-0.126338	0.823327	-0.173963	0.627543
TRINITY_DN10559_c1_g2	---NA---	1.19324	0.21424	-0.0885194	0.9534	-1.28176	0.0684946
TRINITY_DN1056_c0_g1	zinc finger protein 436-like isoform X2	0.0365813	0.934428	-0.22437	0.522174	-0.260952	0.291898
TRINITY_DN1056_c0_g1	zinc finger protein OZF-like isoform X1	0.0365813	0.934428	-0.22437	0.522174	-0.260952	0.291898
TRINITY_DN1056_c0_g1	zinc finger protein 501-like	0.0365813	0.934428	-0.22437	0.522174	-0.260952	0.291898
TRINITY_DN1056_c0_g2	zinc finger protein 501-like	0.367727	0.628038	0.587705	0.371844	0.219977	0.641931
TRINITY_DN1056_c1_g2	zinc finger protein 501-like	0.399531	0.400559	0.639235	0.129993	0.239703	0.424687
TRINITY_DN10560_c0_g1	protein FMC1 homolog	0.570469	0.178286	0.381926	0.39684	-0.188544	0.573941
TRINITY_DN10560_c1_g1	---NA---	0.344472	0.713094	-0.270773	0.810259	-0.615244	0.367557
TRINITY_DN10560_c1_g3	exportin-7-like	-0.219435	0.610555	-0.425855	0.289346	-0.20642	0.519881
TRINITY_DN10560_c2_g2	---NA---	0.00638753	0.989187	0.170525	0.640658	0.164137	0.518441
TRINITY_DN10560_c3_g1	---NA---	-0.65042	0.311049	0.147504	0.841407	0.797923	0.0709848
TRINITY_DN105600_c2_g1	inositol hexakisphosphate kinase 3 isoform X1	0.196348	0.743785	0.0749689	0.916512	-0.121379	0.773803
TRINITY_DN10561_c0_g1	GPALPP motifs-containing protein 1 isoform X1	-0.22031	0.270205	0.234279	0.23323	0.454589	0.00266435
TRINITY_DN10561_c0_g1	GPALPP motifs-containing protein 1	-0.22031	0.270205	0.234279	0.23323	0.454589	0.00266435
TRINITY_DN10561_c1_g1	---NA---	0.135502	0.810024	0.409268	0.37511	0.273766	0.424069
TRINITY_DN10562_c0_g1	NAD(P)H-hydrate epimerase	0.13587	0.877267	1.13737	0.0635223	1.0015	0.0265259
TRINITY_DN10564_c1_g1	Retrovirus-related Pol polyprotein from transposon 297	0.530242	0.747802	0.387459	0.815527	-0.142782	0.896237
TRINITY_DN10565_c0_g1	branched-chain amino acid ABC transporter substrate-binding protein	0.352619	0.598262	0.10678	0.898795	-0.245839	0.612617
TRINITY_DN10566_c0_g1	C-terminal-binding protein 2 isoform X1	0.42204	0.31173	0.500893	0.218252	0.078853	0.820736
TRINITY_DN10566_c0_g1	C-terminal-binding protein 2 isoform X3	0.42204	0.31173	0.500893	0.218252	0.078853	0.820736
TRINITY_DN10566_c0_g2	sprT-like domain-containing protein Spartan isoform X2	0.357169	0.48208	0.702283	0.110619	0.345113	0.278225
TRINITY_DN10566_c2_g1	---NA---	0.763476	0.361705	-0.621601	0.622141	-1.38508	0.10606
TRINITY_DN10567_c2_g1	rna-directed dna polymerase from mobile element jockey-like	0.47583	0.399192	-0.0127753	0.988198	-0.488605	0.235806
TRINITY_DN10568_c0_g1	---NA---	1.97404	0.280234	2.41967	0.117627	0.445624	0.560899
TRINITY_DN10569_c0_g1	protein CASC4 isoform X1	0.0469231	0.909787	-0.274551	0.401084	-0.321474	0.173539
TRINITY_DN1057_c0_g1	nck-associated protein 1 isoform X4	-0.0679968	0.691868	-0.0174189	0.934973	0.0505779	0.688167
TRINITY_DN1057_c0_g1	nck-associated protein 1 isoform X2	-0.0679968	0.691868	-0.0174189	0.934973	0.0505779	0.688167
TRINITY_DN1057_c0_g1	nck-associated protein 1	-0.0679968	0.691868	-0.0174189	0.934973	0.0505779	0.688167
TRINITY_DN1057_c0_g1	nck-associated protein 1-like	-0.0679968	0.691868	-0.0174189	0.934973	0.0505779	0.688167
TRINITY_DN1057_c5_g1	hypothetical protein N329_07973, partial	0.218256	0.763296	-0.368254	0.598927	-0.58651	0.2146
TRINITY_DN10570_c0_g1	cytoplasmic polyadenylation element-binding protein 3 isoform X1	0.123417	0.791881	-0.211207	0.63434	-0.334623	0.260707
TRINITY_DN10570_c0_g1	---NA---	0.123417	0.791881	-0.211207	0.63434	-0.334623	0.260707
TRINITY_DN10571_c0_g1	frizzled-3	-0.372685	0.260683	0.152201	0.689825	0.524886	0.0315739
TRINITY_DN10571_c0_g1	---NA---	-0.372685	0.260683	0.152201	0.689825	0.524886	0.0315739
TRINITY_DN10573_c1_g3	argininosuccinate lyase	-0.228924	0.633093	1.1031	0.00440705	1.33202	3.69151e-05
TRINITY_DN10574_c1_g1	protein ALP1-like	-0.0702263	0.959322	0.377955	0.730645	0.448182	0.536786
TRINITY_DN10574_c2_g1	putative nuclease HARBI1 isoform X1	0.868079	0.29037	0.879463	0.281621	0.0113842	0.988476
TRINITY_DN10575_c0_g1	---NA---	-0.429542	0.41924	-2.72589	0.00882314	-2.29635	0.0133823
TRINITY_DN10575_c0_g2	MORC family CW-type zinc finger protein 3 isoform X3	-0.412751	0.695115	-0.455034	0.685375	-0.0422834	0.966801
TRINITY_DN10575_c2_g1	---NA---	0.605128	0.131988	0.534767	0.176431	-0.0703608	0.828317
TRINITY_DN10576_c0_g1	Testin	-0.189921	0.708188	-0.533488	0.254417	-0.343567	0.353227
TRINITY_DN10578_c2_g1	rna-directed dna polymerase from mobile element jockey-like	0.693817	0.245632	0.410135	0.5302	-0.283681	0.531728
TRINITY_DN10578_c3_g1	RNA-directed DNA polymerase from mobile element jockey-like	0.220839	0.751008	-0.465875	0.493283	-0.686714	0.151015
TRINITY_DN10578_c4_g1	RNA-directed DNA polymerase from mobile element jockey-like	-0.0166268	0.983465	0.260355	0.66165	0.276981	0.490074
TRINITY_DN105780_c0_g1	RNA-directed DNA polymerase from mobile element jockey-like	0.137795	0.832591	0.00375605	0.996314	-0.134039	0.762884
TRINITY_DN1058_c0_g1	Krueppel-like factor 2	0.0250945	0.945589	0.207125	0.450739	0.182031	0.361831
TRINITY_DN1058_c0_g1	glutaredoxin-like protein C5orf63 homolog	0.0250945	0.945589	0.207125	0.450739	0.182031	0.361831
TRINITY_DN1058_c1_g1	Krueppel-like factor 2	0.151846	0.785921	-0.282745	0.589808	-0.43459	0.220813
TRINITY_DN1058_c1_g2	Krueppel-like factor 2	0.566689	0.327392	-0.194064	0.796192	-0.760753	0.0732181
TRINITY_DN1058_c1_g3	Krueppel-like factor 2	0.289558	0.551091	-0.241592	0.641911	-0.53115	0.117476
TRINITY_DN10580_c0_g1	---NA---	-0.0408462	0.944792	-0.0560979	0.924611	-0.0152517	0.970202
TRINITY_DN10582_c0_g1	Putative olfactory receptor 52P1	0.282211	0.651309	-1.02668	0.0912063	-1.30889	0.00748156
TRINITY_DN10582_c1_g1	rna-directed dna polymerase from mobile element jockey-like	1.12589	0.0352355	0.459222	0.440167	-0.666671	0.0920641
TRINITY_DN10582_c1_g1	---NA---	1.12589	0.0352355	0.459222	0.440167	-0.666671	0.0920641
TRINITY_DN10583_c1_g1	RNA-directed DNA polymerase from mobile element jockey-like	-0.124852	0.770047	0.493312	0.138297	0.618164	0.0146669
TRINITY_DN10583_c4_g1	RNA-directed DNA polymerase from mobile element jockey-like	-0.243415	0.754226	-0.298578	0.700993	-0.0551632	0.931342
TRINITY_DN10584_c0_g1	---NA---	-0.430835	0.285308	-0.420856	0.31906	0.00997951	0.98221
TRINITY_DN105872_c0_g2	interferon-induced GTP-binding protein Mx1-like	0.0660862	0.96044	0.129661	0.918202	0.0635743	0.939122
TRINITY_DN10589_c0_g1	Zinc finger protein 3	-0.0830127	0.844793	0.889951	0.00370442	0.972963	0.000101246
TRINITY_DN1059_c0_g1	ectonucleoside triphosphate diphosphohydrolase 7	0.201395	0.474836	-1.01827	0.000507924	-1.21966	2.35282e-06
TRINITY_DN1059_c1_g1	probable ATP-dependent RNA helicase DDX49	-0.268901	0.273686	-0.82867	0.00120458	-0.55977	0.00506924
TRINITY_DN1059_c2_g1	MLX-interacting protein-like	0.308448	0.37566	-0.609504	0.0837753	-0.917951	0.00126515
TRINITY_DN1059_c2_g2	---NA---	-0.119067	0.573998	-0.0335198	0.899787	0.0855473	0.584595
TRINITY_DN1059_c2_g2	arf-GAP with GTPase, ANK repeat and PH domain-containing protein 1	-0.119067	0.573998	-0.0335198	0.899787	0.0855473	0.584595
TRINITY_DN10593_c0_g3	---NA---	-0.57897	0.47681	-0.58409	0.493056	-0.00512029	0.995904
TRINITY_DN10593_c2_g1	---NA---	0.842418	0.366898	1.83599	0.0198786	0.993573	0.0434989
TRINITY_DN10594_c0_g1	ERC protein 2	-0.0519715	0.914687	-0.414734	0.285937	-0.362763	0.222105
TRINITY_DN10595_c0_g1	Deleted in malignant brain tumors 1 protein	0.375606	0.502634	0.742576	0.117545	0.366969	0.271343
TRINITY_DN10595_c1_g1	Mitogen-activated protein kinase kinase kinase kinase 3	0.281807	0.786199	1.79099	0.0117885	1.50918	0.00260442
TRINITY_DN10597_c0_g1	membrane-spanning 4-domains subfamily A member 15-like	0.0510493	0.913181	-0.169812	0.675111	-0.220861	0.418987
TRINITY_DN105980_c0_g1	---NA---	1.23483	0.503734	0.395379	0.86155	-0.83945	0.415107
TRINITY_DN10599_c0_g1	unconventional myosin-Va isoform X5	0.285921	0.525839	0.553751	0.163427	0.26783	0.376343
TRINITY_DN10599_c0_g1	unconventional myosin-Va isoform X2	0.285921	0.525839	0.553751	0.163427	0.26783	0.376343
TRINITY_DN106_c0_g1	DNA polymerase epsilon subunit 2	0.0120706	0.973655	0.133805	0.628787	0.121734	0.530679
TRINITY_DN106_c1_g1	BCL-6 corepressor isoform X1	-0.0725233	0.698573	0.278682	0.0730733	0.351205	0.00418828
TRINITY_DN106_c1_g2	BCL-6 corepressor	0.0658014	0.838816	0.216844	0.416479	0.151043	0.444239
TRINITY_DN106_c1_g3	BCL-6 corepressor-like	0.337463	0.441547	0.202564	0.670119	-0.1349	0.677642
TRINITY_DN1060_c0_g1	RING finger protein 113A	-0.0957889	0.72303	-0.507173	0.0277926	-0.411384	0.0234661
TRINITY_DN1060_c1_g1	---NA---	0.243485	0.827385	-0.953143	0.425104	-1.19663	0.166618
TRINITY_DN10601_c0_g1	---NA---	0.172059	0.760618	0.271684	0.603803	0.0996242	0.80615
TRINITY_DN10602_c0_g1	receptor expression-enhancing protein 6	-0.0741624	0.894684	-0.335217	0.464687	-0.261055	0.445313
TRINITY_DN10605_c0_g1	---NA---	-0.481043	0.219546	-0.902743	0.0326288	-0.4217	0.237048
TRINITY_DN10605_c2_g1	---NA---	0.493059	0.316638	-0.0213397	0.977198	-0.514399	0.160858
TRINITY_DN10606_c1_g1	retrotransposon-like protein 1	-0.405753	0.623647	-0.0341321	0.974502	0.371621	0.529386
TRINITY_DN10607_c0_g1	zinc finger protein 721-like	0.304492	0.398692	-0.310646	0.418007	-0.615138	0.0232348
TRINITY_DN10608_c0_g1	branched-chain amino acid ABC transporter substrate-binding protein	0.172107	0.82485	0.230655	0.756762	0.0585475	0.91489
TRINITY_DN10608_c0_g2	SUN domain-containing ossification factor isoform X3	0.365527	0.534293	0.487757	0.378574	0.12223	0.78693
TRINITY_DN10608_c1_g2	RNA-directed DNA polymerase from mobile element jockey-like	-0.204247	0.622207	-0.31506	0.427996	-0.110813	0.73708
TRINITY_DN10608_c2_g1	putative oxidoreductase GLYR1 isoform X1	0.754819	0.58065	0.201398	0.90441	-0.553421	0.493876
TRINITY_DN10609_c0_g1	A-kinase anchor protein 11	-0.158392	0.882121	-0.0407669	0.971867	0.117625	0.870015
TRINITY_DN10609_c0_g2	regulator of G-protein signaling 9-binding protein	0.2359	0.592127	0.273377	0.522319	0.0374769	0.916743
TRINITY_DN1061_c0_g1	E3 ubiquitin-protein ligase makorin-1 isoform X2	-0.214286	0.349027	0.00208908	0.995368	0.216375	0.199144
TRINITY_DN1061_c0_g2	E3 ubiquitin-protein ligase makorin-1 isoform X1	-0.158708	0.316439	-0.0328069	0.87939	0.125901	0.298989
TRINITY_DN1061_c1_g1	Mitogen-activated protein kinase 11	0.159206	0.508554	0.404537	0.0569167	0.245332	0.129303
TRINITY_DN1061_c1_g1	Dynein heavy chain 6, axonemal	0.159206	0.508554	0.404537	0.0569167	0.245332	0.129303
TRINITY_DN1061_c1_g1	mitogen-activated protein kinase 11	0.159206	0.508554	0.404537	0.0569167	0.245332	0.129303
TRINITY_DN10610_c0_g1	voltage-gated potassium channel subunit beta-2 isoform X4	0.150774	0.659239	0.291285	0.337578	0.140511	0.545912
TRINITY_DN10610_c0_g1	voltage-gated potassium channel subunit beta-2 isoform X2	0.150774	0.659239	0.291285	0.337578	0.140511	0.545912
TRINITY_DN10611_c0_g1	optic atrophy 3 protein	0.246456	0.659239	-0.731292	0.155951	-0.977749	0.0142467
TRINITY_DN10612_c0_g1	Tripartite motif-containing protein 39	-0.0547786	0.877895	0.0388035	0.921039	0.0935821	0.688774
TRINITY_DN10612_c0_g1	cathepsin D	-0.0547786	0.877895	0.0388035	0.921039	0.0935821	0.688774
TRINITY_DN10612_c0_g2	cathepsin D	0.389718	0.57075	0.629585	0.310939	0.239868	0.616801
TRINITY_DN10612_c3_g1	Butyrophilin-like protein 2	0.0628069	0.935913	-0.196349	0.779289	-0.259156	0.56307
TRINITY_DN10613_c0_g1	---NA---	0.0413867	0.947606	-0.0378142	0.952526	-0.079201	0.839469
TRINITY_DN10614_c0_g1	cx9C motif-containing protein 4 isoform X1	0.0403868	0.920034	0.313546	0.280834	0.273159	0.19931
TRINITY_DN10614_c1_g1	hypothetical protein UY3_05797	-0.286233	0.541173	0.333796	0.44833	0.620028	0.0451467
TRINITY_DN10614_c2_g1	cx9C motif-containing protein 4 isoform X1	0.302171	0.434155	0.24914	0.535527	-0.0530307	0.872359
TRINITY_DN10615_c0_g1	homeodomain-interacting protein kinase 3 isoform X1	0.0203174	0.943023	0.203915	0.319237	0.183598	0.225062
TRINITY_DN10615_c0_g1	Homeodomain-interacting protein kinase 3	0.0203174	0.943023	0.203915	0.319237	0.183598	0.225062
TRINITY_DN10615_c0_g1	tripartite motif-containing protein 10-like	0.0203174	0.943023	0.203915	0.319237	0.183598	0.225062
TRINITY_DN10615_c1_g1	zinc finger C2HC domain-containing protein 1A	0.132801	0.843127	-0.328012	0.590431	-0.460813	0.269564
TRINITY_DN10615_c2_g1	protein-L-isoaspartate O-methyltransferase domain-containing protein 1 isoform X1	0.00611089	0.994822	0.43304	0.562014	0.426929	0.401995
TRINITY_DN10615_c2_g1	hypothetical protein UY3_14134	0.00611089	0.994822	0.43304	0.562014	0.426929	0.401995
TRINITY_DN10617_c0_g1	cytochrome c1, heme protein, mitochondrial	0.323979	0.474341	-0.568585	0.208294	-0.892564	0.00949494
TRINITY_DN10618_c0_g1	rho family-interacting cell polarization regulator 1 isoform X2	0.371984	0.285799	-0.454253	0.215678	-0.826237	0.0032887
TRINITY_DN10619_c0_g1	dynein heavy chain 12, axonemal	0.339647	0.546875	0.791116	0.100772	0.451468	0.209276
TRINITY_DN10619_c0_g1	hypothetical protein UY3_02713	0.339647	0.546875	0.791116	0.100772	0.451468	0.209276
TRINITY_DN1062_c0_g1	bromodomain-containing protein 1 isoform X3	-0.0619468	0.756015	0.0791971	0.683543	0.141144	0.26551
TRINITY_DN1062_c0_g1	bromodomain-containing protein 1 isoform X1	-0.0619468	0.756015	0.0791971	0.683543	0.141144	0.26551
TRINITY_DN1062_c0_g1	bromodomain-containing protein 1-like	-0.0619468	0.756015	0.0791971	0.683543	0.141144	0.26551
TRINITY_DN10620_c0_g1	---NA---	0.361031	0.660207	-1.29729	0.233599	-1.65833	0.0571369
TRINITY_DN10621_c0_g1	T-cell activation inhibitor, mitochondrial	-0.142023	0.653325	-0.285439	0.324498	-0.143416	0.531582
TRINITY_DN10623_c1_g1	RNA-directed DNA polymerase from mobile element jockey-like	-0.0145502	0.988461	-0.0919258	0.928168	-0.0773756	0.905722
TRINITY_DN10624_c0_g1	---NA---	0.0242907	0.981725	-0.702112	0.444359	-0.726402	0.292116
TRINITY_DN10625_c0_g1	RING finger protein 227	-0.148801	0.780959	-0.632812	0.163264	-0.484011	0.171839
TRINITY_DN10626_c0_g2	zinc finger protein 485-like	-0.291802	0.567114	-0.497439	0.30643	-0.205637	0.605052
TRINITY_DN10626_c0_g2	---NA---	-0.291802	0.567114	-0.497439	0.30643	-0.205637	0.605052
TRINITY_DN10629_c0_g1	luc7-like protein 3 isoform X7	-0.141381	0.695276	-0.278686	0.403628	-0.137305	0.601868
TRINITY_DN10629_c0_g1	luc7-like protein 3 isoform X3	-0.141381	0.695276	-0.278686	0.403628	-0.137305	0.601868
TRINITY_DN1063_c0_g1	AN1-type zinc finger protein 2B isoform X2	0.148978	0.685193	-0.104514	0.797547	-0.253492	0.30774
TRINITY_DN1063_c1_g1	chromodomain Y-like protein	-0.187128	0.551248	0.207351	0.490581	0.394479	0.0581013
TRINITY_DN10631_c0_g1	5'-nucleotidase domain-containing protein 2	0.21553	0.652934	-0.05716	0.924831	-0.27269	0.411988
TRINITY_DN10633_c0_g1	Low-density lipoprotein receptor-related protein 1B	0.783839	0.477293	-1.89755	0.362249	-2.68139	0.108004
TRINITY_DN106330_c0_g1	unconventional myosin-Id	0.711002	0.0932764	1.16034	0.00437961	0.449343	0.123209
TRINITY_DN10634_c0_g1	---NA---	-0.493403	0.238715	-0.533295	0.215982	-0.0398923	0.923394
TRINITY_DN10634_c0_g1	6-phosphofructokinase type C	-0.493403	0.238715	-0.533295	0.215982	-0.0398923	0.923394
TRINITY_DN10636_c0_g1	---NA---	0.119594	0.909644	0.267578	0.77756	0.147985	0.825437
TRINITY_DN10638_c0_g1	somatomedin-B and thrombospondin type-1 domain-containing protein-like	-0.5202	0.236775	-0.586739	0.193006	-0.0665388	0.87651
TRINITY_DN106384_c0_g1	rna-directed dna polymerase from mobile element jockey-like	-1.14987	0.0944831	-1.86749	0.0269998	-0.717616	0.341519
TRINITY_DN10639_c0_g3	---NA---	-0.49734	0.214504	-0.11848	0.817406	0.37886	0.221682
TRINITY_DN1064_c0_g1	TBC1 domain family member 17	0.165097	0.617241	-0.518327	0.0817092	-0.683424	0.00393508
TRINITY_DN1064_c0_g1	TBC1 domain family member 17 isoform X2	0.165097	0.617241	-0.518327	0.0817092	-0.683424	0.00393508
TRINITY_DN10641_c0_g1	autophagy-related protein 16-1	1.27948	0.119267	0.372267	0.712662	-0.907217	0.0732181
TRINITY_DN10642_c1_g1	inositol hexakisphosphate kinase 3 isoform X1	0.756999	0.0979664	0.650234	0.153888	-0.106765	0.779928
TRINITY_DN10643_c0_g1	NADH dehydrogenase [ubiquinone] 1 beta subcomplex subunit 7	-0.197341	0.470195	-0.317218	0.227746	-0.119877	0.578555
TRINITY_DN10643_c1_g1	phosphatidylcholine transfer protein isoform X1	0.11989	0.817851	0.396877	0.346404	0.276987	0.375536
TRINITY_DN10645_c0_g1	Complement component C6	-0.502127	0.122229	-0.573492	0.0837235	-0.0713648	0.819742
TRINITY_DN10645_c0_g2	F-actin-capping protein subunit beta	0.0940224	0.770047	0.175023	0.545942	0.0810009	0.715925
TRINITY_DN10645_c0_g3	---NA---	0.399655	0.49167	-0.230331	0.76069	-0.629986	0.173888
TRINITY_DN10646_c0_g1	---NA---	-0.370906	0.367904	-1.0888	0.00936955	-0.717897	0.0315397
TRINITY_DN10647_c0_g1	Presequence protease, mitochondrial	0.308283	0.636054	-0.558898	0.422302	-0.867182	0.0852179
TRINITY_DN10648_c0_g2	SH2 domain-containing protein 4B	-0.414985	0.154159	0.388138	0.166049	0.803123	0.000394213
TRINITY_DN10648_c0_g2	Small nuclear ribonucleoprotein F	-0.414985	0.154159	0.388138	0.166049	0.803123	0.000394213
TRINITY_DN10648_c0_g3	small nuclear ribonucleoprotein F-like	1.0883	0.620134	-0.565281	0.860188	-1.65358	0.344581
TRINITY_DN10648_c0_g3	coiled-coil domain-containing protein 38	1.0883	0.620134	-0.565281	0.860188	-1.65358	0.344581
TRINITY_DN10649_c0_g1	selenide, water dikinase 1	-0.174641	0.420664	0.335075	0.0872303	0.509716	0.00119174
TRINITY_DN10649_c0_g1	Selenide, water dikinase 1	-0.174641	0.420664	0.335075	0.0872303	0.509716	0.00119174
TRINITY_DN1065_c0_g1	Methyltransferase-like protein 13	-0.194985	0.514546	-0.393401	0.160098	-0.198416	0.377922
TRINITY_DN10650_c0_g1	eIF-2-alpha kinase GCN2 isoform X2	0.127898	0.815673	0.711455	0.0826174	0.583557	0.0571387
TRINITY_DN10651_c0_g1	unconventional myosin-Ig	0.46796	0.311364	0.103966	0.870672	-0.363994	0.295931
TRINITY_DN10651_c0_g1	---NA---	0.46796	0.311364	0.103966	0.870672	-0.363994	0.295931
TRINITY_DN10652_c0_g1	Sideroflexin-5	-0.185066	0.674703	-0.014951	0.979417	0.170115	0.58887
TRINITY_DN106535_c0_g1	rho guanine nucleotide exchange factor 7 isoform X1	-0.189242	0.580142	0.131034	0.717577	0.320277	0.16052
TRINITY_DN106549_c0_g1	ras-specific guanine nucleotide-releasing factor 1	-0.849766	0.234125	-0.235255	0.792014	0.614511	0.272863
TRINITY_DN106549_c0_g2	Ras-specific guanine nucleotide-releasing factor 1	-0.77302	0.497742	0.184176	0.894857	0.957196	0.22865
TRINITY_DN10655_c0_g1	RE1-silencing transcription factor	-0.0808338	0.739851	0.268205	0.184819	0.349039	0.022052
TRINITY_DN10656_c0_g2	RNA-directed DNA polymerase from mobile element jockey-like	0.758035	0.378766	1.13921	0.112397	0.381177	0.337912
TRINITY_DN10656_c0_g3	RNA-directed DNA polymerase from mobile element jockey-like	-0.472652	0.286865	-0.262558	0.580988	0.210094	0.564708
TRINITY_DN10657_c0_g1	N-acetyltransferase 14	-0.254901	0.553453	-0.0848297	0.87298	0.170071	0.595674
TRINITY_DN10658_c0_g1	RNA-directed DNA polymerase from mobile element jockey-like	0.00309574	0.995795	0.294485	0.537411	0.291389	0.38475
TRINITY_DN10658_c0_g3	---NA---	0.265893	0.643463	0.752594	0.0872299	0.486701	0.104112
TRINITY_DN1066_c0_g1	Leucine-rich repeat-containing protein 49	0.231134	0.651322	0.126886	0.828266	-0.104248	0.791685
TRINITY_DN1066_c0_g2	Leucine-rich repeat-containing protein 49	0.3808	0.482613	0.725895	0.135423	0.345095	0.351133
TRINITY_DN10661_c0_g1	Zinc finger and SCAN domain-containing protein 29	-0.354114	0.31621	-0.0593165	0.899058	0.294797	0.267342
TRINITY_DN10662_c0_g1	F-box/WD repeat-containing protein 2	-0.0383314	0.893168	-0.236171	0.289835	-0.19784	0.237052
TRINITY_DN10662_c0_g4	retrotransposon-like family member retr-1	0.181379	0.826312	0.0284182	0.97661	-0.152961	0.777844
TRINITY_DN10662_c1_g1	---NA---	-0.318708	0.608785	0.024486	0.974566	0.343194	0.416433
TRINITY_DN10663_c1_g1	---NA---	-0.185638	0.770484	-0.54562	0.338689	-0.359982	0.42082
TRINITY_DN10664_c0_g3	arf-GAP domain and FG repeat-containing protein 1 isoform X2	0.298056	0.64474	0.354184	0.572011	0.0561279	0.912851
TRINITY_DN10666_c0_g1	---NA---	-1.17937	0.0861751	-1.61059	0.0650951	-0.431217	0.621002
TRINITY_DN10668_c0_g1	hepatitis A virus cellular receptor 1 homolog	-0.168443	0.73649	-0.520849	0.236842	-0.352406	0.304511
TRINITY_DN10669_c0_g1	---NA---	0.806146	0.376731	0.862496	0.307708	0.0563497	0.926357
TRINITY_DN1067_c0_g1	nuclear receptor coactivator 1 isoform X5	-0.0652801	0.816054	-0.182572	0.450584	-0.117292	0.522361
TRINITY_DN1067_c0_g2	---NA---	-0.0139437	0.981198	0.216796	0.633955	0.230739	0.459999
TRINITY_DN1067_c1_g1	Neuronal PAS domain-containing protein 3	1.40487	0.315832	0.649048	0.693389	-0.755824	0.398049
TRINITY_DN1067_c1_g2	glioma pathogenesis-related protein 1-like	0.427847	0.277985	-0.186141	0.699326	-0.613987	0.0413374
TRINITY_DN106705_c0_g1	mothers against decapentaplegic homolog 4-like isoform X1	0.386939	0.465322	-0.226898	0.716191	-0.613837	0.111278
TRINITY_DN106710_c0_g2	craniofacial development protein 2-like	0.123383	0.921927	0.171527	0.88729	0.0481436	0.950993
TRINITY_DN10672_c0_g1	---NA---	0.270334	0.522468	-0.13915	0.780548	-0.409484	0.172172
TRINITY_DN10672_c1_g1	zinc finger BED domain-containing protein 1	0.0158562	0.972433	0.161191	0.643627	0.145335	0.550507
TRINITY_DN10672_c1_g2	septin-2 isoform X2	1.72369	0.134758	1.14913	0.287257	-0.574555	0.254655
TRINITY_DN10672_c2_g1	---NA---	-0.123046	0.852431	-0.666588	0.219247	-0.543542	0.194114
TRINITY_DN10673_c0_g1	Keratinocyte-associated transmembrane protein 2	-0.288165	0.618777	0.0156758	0.983822	0.303841	0.45258
TRINITY_DN10674_c0_g1	---NA---	0.519297	0.47681	1.19655	0.0385179	0.677255	0.0535789
TRINITY_DN10675_c1_g1	---NA---	0.0500352	0.951479	-0.0446091	0.957577	-0.0946443	0.85212
TRINITY_DN10675_c1_g2	---NA---	1.94967	0.647892	3.08963	0.338689	1.13995	0.32445
TRINITY_DN10675_c1_g3	---NA---	-0.0577342	0.922864	-0.800072	0.0814267	-0.742338	0.0416213
TRINITY_DN10675_c1_g4	---NA---	0.541268	0.611941	-0.327518	0.787056	-0.868786	0.170891
TRINITY_DN10675_c2_g1	F-box/WD repeat-containing protein 12	-0.156114	0.716113	-0.374752	0.332233	-0.218639	0.469193
TRINITY_DN10676_c2_g1	Trip12 protein	-0.00532197	0.993228	0.530019	0.214912	0.535341	0.0762903
TRINITY_DN10678_c0_g1	---NA---	0.291697	0.434422	0.370508	0.303525	0.0788109	0.792954
TRINITY_DN10679_c0_g2	chromodomain-helicase-DNA-binding protein 8	0.636116	0.134677	-0.634827	0.176851	-1.27094	0.000619853
TRINITY_DN10679_c0_g2	chromodomain-helicase-DNA-binding protein 8 isoform X1	0.636116	0.134677	-0.634827	0.176851	-1.27094	0.000619853
TRINITY_DN10679_c0_g3	chromodomain-helicase-DNA-binding protein 6 isoform X1	0.0878702	0.740196	0.294321	0.178243	0.206451	0.209003
TRINITY_DN1068_c0_g1	F-BAR domain only protein 1	0.942966	0.0136009	-0.306982	0.489437	-1.24995	0.000150151
TRINITY_DN1068_c1_g1	hypothetical protein UY3_02524	-0.0265829	0.936042	0.134618	0.60983	0.161201	0.374857
TRINITY_DN1068_c2_g1	lysM and putative peptidoglycan-binding domain-containing protein 1	-0.408521	0.160496	-0.329739	0.276386	0.0787826	0.766069
TRINITY_DN1068_c3_g1	---NA---	0.000671921	0.998838	0.23054	0.489398	0.229868	0.333316
TRINITY_DN10681_c0_g1	tryptophan 5-hydroxylase 2-like	-0.0946033	0.909951	-0.224066	0.770999	-0.129462	0.816148
TRINITY_DN10682_c0_g1	---NA---	-0.241153	0.602008	-0.200046	0.679526	0.0411073	0.918182
TRINITY_DN10686_c0_g1	Leucine-rich repeat-containing protein 49	-0.139972	0.859309	-0.174454	0.827706	-0.0344828	0.953868
TRINITY_DN10688_c0_g1	---NA---	0.632453	0.0431359	0.681498	0.0272283	0.049045	0.859303
TRINITY_DN10688_c0_g1	lamin-B2	0.632453	0.0431359	0.681498	0.0272283	0.049045	0.859303
TRINITY_DN10688_c0_g2	Blood vessel epicardial substance	-0.0135307	0.98793	-0.160349	0.845788	-0.146819	0.789731
TRINITY_DN1069_c0_g1	rna-directed dna polymerase from mobile element jockey-like	0.152014	0.747653	-1.05347	0.0180638	-1.20548	0.00128318
TRINITY_DN1069_c0_g2	sorting and assembly machinery component 50 homolog	-0.0232557	0.929478	0.0239326	0.929363	0.0471883	0.77577
TRINITY_DN1069_c0_g3	---NA---	0.0802401	0.81605	0.206634	0.482558	0.126394	0.566856
TRINITY_DN1069_c0_g3	Putative phospholipid-transporting ATPase VB	0.0802401	0.81605	0.206634	0.482558	0.126394	0.566856
TRINITY_DN1069_c1_g1	---NA---	0.433797	0.679536	-0.79713	0.542372	-1.23093	0.184141
TRINITY_DN10690_c0_g1	---NA---	-0.301714	0.497134	-0.83025	0.0681283	-0.528537	0.160822
TRINITY_DN10694_c0_g1	sulfotransferase 6B1-like	0.23463	0.793168	0.614038	0.407518	0.379408	0.487963
TRINITY_DN10695_c0_g1	Heterogeneous nuclear ribonucleoprotein H	-0.110621	0.764123	-0.170566	0.626407	-0.0599449	0.828593
TRINITY_DN10695_c1_g1	heterogeneous nuclear ribonucleoprotein H isoform X1	-0.125995	0.830162	0.610273	0.136994	0.736267	0.0136033
TRINITY_DN10696_c0_g1	zinc finger protein 883-like	-0.284842	0.247691	0.147863	0.584234	0.432706	0.0176165
TRINITY_DN10698_c0_g2	immunoglobulin superfamily member 3 isoform X2	0.146818	0.751079	-0.654967	0.117452	-0.801785	0.0145985
TRINITY_DN10698_c0_g3	Zinc finger and SCAN domain-containing protein 29	-0.63898	0.111893	-0.0583453	0.916151	0.580634	0.0605611
TRINITY_DN107_c0_g1	dolichyl-diphosphooligosaccharide--protein glycosyltransferase 48 kDa subunit	-0.201412	0.282675	-0.0829373	0.710259	0.118474	0.42565
TRINITY_DN107_c1_g2	SH2 domain-containing protein 4B	-0.0378124	0.96298	-0.269462	0.693345	-0.231649	0.634474
TRINITY_DN1070_c0_g1	PREDICTED: uncharacterized protein LOC103553236	0.0349412	0.898492	0.254302	0.205263	0.21936	0.140601
TRINITY_DN1070_c0_g2	E3 ubiquitin-protein ligase RNF149	0.160071	0.502826	0.252493	0.255441	0.0924227	0.600872
TRINITY_DN1070_c1_g1	---NA---	0.530186	0.227652	-1.23799	0.0110937	-1.76818	3.10864e-05
TRINITY_DN10703_c0_g1	---NA---	-0.238295	0.473526	-0.309912	0.344122	-0.0716168	0.801435
TRINITY_DN10704_c0_g1	ubiquitin carboxyl-terminal hydrolase 47	0.662232	0.697334	-0.668935	0.745898	-1.33117	0.272564
TRINITY_DN107058_c0_g1	spectrin alpha chain, non-erythrocytic 1-like	0.442246	0.678652	0.40047	0.705474	-0.0417754	0.956646
TRINITY_DN107072_c0_g1	Fanconi anemia group M protein	0.424326	0.524398	-0.527047	0.44557	-0.951373	0.0489317
TRINITY_DN10708_c3_g1	---NA---	0.031272	0.97636	-0.45754	0.621468	-0.488812	0.463573
TRINITY_DN107090_c0_g1	Zinc finger and SCAN domain-containing protein 29	0.0783334	0.878871	-0.521653	0.222023	-0.599986	0.0633169
TRINITY_DN1071_c0_g1	kynurenine--oxoglutarate transaminase 1 isoform X1	0.245882	0.14908	0.321025	0.0535052	0.075143	0.585304
TRINITY_DN10712_c0_g1	forkhead-associated domain-containing protein 1 isoform X1	0.257482	0.575115	0.333997	0.443719	0.0765153	0.829793
TRINITY_DN10715_c0_g1	cytokine receptor common subunit beta-like	-0.288644	0.746268	-1.12159	0.217232	-0.832945	0.262537
TRINITY_DN10716_c1_g1	zinc finger protein Aiolos isoform X2	0.0736496	0.869311	0.406257	0.233134	0.332607	0.186253
TRINITY_DN10716_c1_g2	Zinc finger protein Aiolos	-0.0450476	0.943926	0.621701	0.145019	0.666749	0.0364462
TRINITY_DN10716_c2_g1	hypothetical protein UY3_08501	-0.70586	0.222474	-0.659467	0.278801	0.0463925	0.937561
TRINITY_DN10716_c6_g1	hypothetical protein UY3_09870	0.00111365	0.999057	-0.396219	0.611692	-0.397332	0.476452
TRINITY_DN10717_c0_g1	protein UXT	-0.39656	0.304968	0.256674	0.522918	0.653233	0.0189441
TRINITY_DN107182_c0_g1	hypothetical protein UY3_04200	0.0428426	0.970642	-0.188586	0.865306	-0.231428	0.742478
TRINITY_DN10719_c0_g2	---NA---	-0.200708	0.688156	-0.100851	0.863718	0.0998576	0.795043
TRINITY_DN1072_c0_g1	Copper chaperone for superoxide dismutase	-0.24263	0.260419	-0.288874	0.183608	-0.0462435	0.814257
TRINITY_DN1072_c0_g1	coiled-coil domain-containing protein 87	-0.24263	0.260419	-0.288874	0.183608	-0.0462435	0.814257
TRINITY_DN1072_c0_g1	putative nuclease HARBI1	-0.24263	0.260419	-0.288874	0.183608	-0.0462435	0.814257
TRINITY_DN1072_c0_g2	UPF0594 protein C13orf38 like protein	-0.0190202	0.965956	-0.923694	0.00389596	-0.904674	0.000596074
TRINITY_DN1072_c0_g3	---NA---	0.251134	0.553087	0.11151	0.823124	-0.139624	0.659563
TRINITY_DN10720_c0_g1	T cell receptor alpha chain	0.418151	0.480642	0.0591564	0.93973	-0.358995	0.338201
TRINITY_DN10721_c2_g1	---NA---	0.812662	0.516988	-0.63146	0.724065	-1.44412	0.204326
TRINITY_DN107229_c0_g1	ribonuclease 4-like isoform X1	-0.789085	0.13689	-1.742	0.0237976	-0.952916	0.165438
TRINITY_DN10723_c0_g1	metallo-beta-lactamase domain-containing protein 1	0.521721	0.452155	0.121871	0.895823	-0.39985	0.428057
TRINITY_DN10724_c0_g1	leucine-rich repeat flightless-interacting protein 1 isoform X23	0.108306	0.607644	0.244554	0.187614	0.136248	0.342716
TRINITY_DN10724_c0_g1	leucine-rich repeat flightless-interacting protein 2-like isoform X1	0.108306	0.607644	0.244554	0.187614	0.136248	0.342716
TRINITY_DN10724_c0_g1	leucine-rich repeat flightless-interacting protein 1 isoform X18	0.108306	0.607644	0.244554	0.187614	0.136248	0.342716
TRINITY_DN10724_c0_g2	Leucine-rich repeat flightless-interacting protein 1	0.10172	0.889239	-0.0337559	0.967363	-0.135476	0.776258
TRINITY_DN10724_c1_g1	MCM domain-containing protein 2	-0.709259	0.043357	-0.120906	0.787788	0.588353	0.0327547
TRINITY_DN10724_c1_g1	minichromosome maintenance domain-containing protein 2 isoform X1	-0.709259	0.043357	-0.120906	0.787788	0.588353	0.0327547
TRINITY_DN10727_c0_g2	zinc finger and SCAN domain-containing protein 2-like isoform X1	0.336294	0.532279	-0.19783	0.754103	-0.534123	0.162801
TRINITY_DN10729_c0_g1	---NA---	-0.467156	0.415076	-0.836114	0.177514	-0.368959	0.487656
TRINITY_DN1073_c0_g1	ubiquitin carboxyl-terminal hydrolase 47-like	-0.120056	0.716064	0.106075	0.756334	0.226132	0.29022
TRINITY_DN1073_c2_g1	ribonucleases P/MRP protein subunit POP1	-0.154104	0.650944	0.344304	0.238724	0.498408	0.0214682
TRINITY_DN1073_c3_g1	Enoyl-CoA hydratase domain-containing protein 2	0.112001	0.804503	0.0411159	0.937577	-0.0708856	0.827182
TRINITY_DN10731_c0_g3	---NA---	0.403137	0.393391	0.436528	0.345337	0.0333909	0.934722
TRINITY_DN10731_c0_g4	voltage-dependent calcium channel gamma-8 subunit	-0.0997414	0.820336	-1.28725	0.00137265	-1.1875	0.00039131
TRINITY_DN107335_c0_g1	zinc finger protein 862-like	0.33135	0.507423	0.51045	0.269039	0.1791	0.621469
TRINITY_DN10734_c0_g2	---NA---	0.368688	0.479163	0.414225	0.407735	0.0455366	0.913726
TRINITY_DN107342_c0_g1	RNA-directed DNA polymerase from mobile element jockey-like	-0.357469	0.138851	-0.286421	0.255441	0.0710477	0.745951
TRINITY_DN107358_c0_g1	membrane-associated guanylate kinase, WW and PDZ domain-containing protein 1 isoform X30	0.335808	0.801919	0.702013	0.538899	0.366204	0.658705
TRINITY_DN107389_c0_g1	---NA---	0.752167	0.286198	0.140358	0.883514	-0.61181	0.173661
TRINITY_DN10739_c0_g1	endonuclease-reverse transcriptase	0.269136	0.554468	0.0135311	0.982756	-0.255605	0.411754
TRINITY_DN1074_c0_g1	cation-transporting ATPase 13A2	0.185565	0.691596	-0.789951	0.0587109	-0.975516	0.00374136
TRINITY_DN1074_c0_g1	cation-transporting ATPase 13A2 isoform X2	0.185565	0.691596	-0.789951	0.0587109	-0.975516	0.00374136
TRINITY_DN10742_c0_g1	Y-box-binding protein 3 isoform X1	0.0255509	0.952954	-0.248612	0.43947	-0.274163	0.235806
TRINITY_DN10742_c3_g1	canalicular multispecific organic anion transporter 2 isoform X1	0.094589	0.947709	-0.197898	0.889078	-0.292487	0.740901
TRINITY_DN107423_c0_g1	probable gluconokinase isoform X1	0.0576877	0.929516	-0.238604	0.667008	-0.296292	0.432733
TRINITY_DN10743_c0_g1	coiled-coil domain-containing protein 157 isoform X1	-0.255208	0.452155	0.244635	0.467344	0.499844	0.0340173
TRINITY_DN10744_c0_g1	rho GTPase-activating protein 30	0.486181	0.467871	-0.0944431	0.918628	-0.580624	0.230937
TRINITY_DN107443_c0_g1	complement decay-accelerating factor-like isoform X1	-0.24489	0.728712	-0.139029	0.863087	0.105861	0.844691
TRINITY_DN107443_c0_g2	complement decay-accelerating factor-like	0.181511	0.64765	0.182633	0.645381	0.00112248	0.997969
TRINITY_DN10745_c0_g1	G-protein coupled receptor 35-like	1.06145	0.0864933	-0.475578	0.531638	-1.53703	0.00354513
TRINITY_DN10745_c3_g1	MORC family CW-type zinc finger protein 3 isoform X3	-0.579978	0.155712	-1.74876	0.000301228	-1.16879	0.00244007
TRINITY_DN10746_c0_g2	---NA---	0.0401883	0.962511	-0.0014465	0.998848	-0.0416348	0.939339
TRINITY_DN10746_c2_g1	---NA---	0.245784	0.87121	-0.435911	0.79973	-0.681695	0.536498
TRINITY_DN10746_c2_g2	rna-directed dna polymerase from mobile element jockey-like	0.342446	0.652905	0.268008	0.727278	-0.0744379	0.890616
TRINITY_DN10748_c0_g1	zinc finger protein 485-like	0.11969	0.907514	-0.0847862	0.94068	-0.204476	0.76531
TRINITY_DN10749_c0_g1	---NA---	0.35432	0.607016	0.566211	0.365304	0.211891	0.663059
TRINITY_DN1075_c0_g1	embryonic stem cell-specific 5-hydroxymethylcytosine-binding protein	-0.169099	0.436007	0.300098	0.134543	0.469197	0.00293296
TRINITY_DN10750_c0_g1	protein O-linked-mannose beta-1,2-N-acetylglucosaminyltransferase 1	0.172146	0.749888	-0.01075	0.987827	-0.182896	0.621572
TRINITY_DN107515_c0_g1	general transcription factor IIH subunit 1	-0.287192	0.647561	0.277055	0.628964	0.564247	0.135849
TRINITY_DN10752_c0_g1	---NA---	-1.42506	0.186474	-0.816373	0.488237	0.608682	0.519881
TRINITY_DN10754_c0_g1	calcitonin gene-related peptide type 1 receptor	1.53699	0.223433	2.36594	0.0247311	0.828947	0.0822549
TRINITY_DN10755_c0_g1	Butyrophilin-like protein 2	0.131692	0.774239	-0.234565	0.591623	-0.366257	0.214336
TRINITY_DN10756_c0_g2	NACHT, LRR and PYD domains-containing protein 3-like	0.281293	0.350154	0.20313	0.525696	-0.0781634	0.753082
TRINITY_DN10756_c0_g2	hypothetical protein N309_04314, partial	0.281293	0.350154	0.20313	0.525696	-0.0781634	0.753082
TRINITY_DN10757_c0_g1	DNA topoisomerase 1	0.436248	0.552163	-0.0819826	0.93381	-0.518231	0.3047
TRINITY_DN10757_c1_g1	hypothetical protein UY3_08477	0.301499	0.75281	0.456951	0.579245	0.155452	0.790631
TRINITY_DN10757_c3_g1	DNA topoisomerase 1	-0.198839	0.789319	-0.0561556	0.94741	0.142684	0.777426
TRINITY_DN10757_c4_g1	---NA---	-0.179175	0.842857	0.0482587	0.96071	0.227433	0.688884
TRINITY_DN10758_c0_g1	---NA---	-0.101168	0.755374	0.199265	0.484175	0.300433	0.129204
TRINITY_DN1076_c0_g1	testis-expressed sequence 30 protein isoform X1	0.117111	0.803045	0.591832	0.100014	0.474721	0.0793508
TRINITY_DN1076_c1_g1	---NA---	-0.0607593	0.935913	-0.187793	0.780322	-0.127034	0.790377
TRINITY_DN1076_c3_g1	TPA-induced transmembrane protein	0.305716	0.629688	-1.52849	0.0144554	-1.8342	0.000491782
TRINITY_DN10760_c0_g1	Vacuolar protein sorting-associated protein 8 like protein	0.486186	0.176722	-0.201126	0.642614	-0.687312	0.014408
TRINITY_DN10761_c0_g1	cytochrome P450 4B1-like	0.273247	0.701626	-0.412515	0.563034	-0.685762	0.159279
TRINITY_DN10761_c0_g1	---NA---	0.273247	0.701626	-0.412515	0.563034	-0.685762	0.159279
TRINITY_DN10761_c0_g3	nucleoside diphosphate kinase 6	0.063355	0.849436	0.0183923	0.962002	-0.0449626	0.846966
TRINITY_DN10761_c1_g2	Actin-related protein 8	0.140748	0.780742	0.307679	0.47881	0.166931	0.608819
TRINITY_DN10761_c1_g2	Kinesin-like protein KIF13B	0.140748	0.780742	0.307679	0.47881	0.166931	0.608819
TRINITY_DN10761_c2_g1	---NA---	0.14747	0.818336	-0.386058	0.514915	-0.533527	0.1923
TRINITY_DN10762_c0_g1	D-beta-hydroxybutyrate dehydrogenase, mitochondrial-like	-0.683354	0.116453	0.0234323	0.97093	0.706787	0.0334905
TRINITY_DN10762_c2_g1	---NA---	0.799304	0.363608	0.257249	0.818156	-0.542054	0.413979
TRINITY_DN10762_c3_g2	hypothetical protein UY3_13337	0.182779	0.646129	0.369722	0.292032	0.186943	0.483395
TRINITY_DN10763_c1_g1	hypothetical protein UY3_17240	0.283402	0.630022	0.133805	0.846351	-0.149597	0.73388
TRINITY_DN107634_c0_g1	---NA---	0.470015	0.442183	-0.527345	0.466334	-0.99736	0.0473199
TRINITY_DN10764_c0_g1	pre-mRNA-processing factor 17	-0.567945	0.168	0.382519	0.352717	0.950464	0.00228686
TRINITY_DN10766_c0_g1	rna-directed dna polymerase from mobile element jockey-like	-0.057814	0.913116	-1.49001	0.00261201	-1.4322	0.000705321
TRINITY_DN107661_c0_g1	RING finger protein 223	-0.0572872	0.863673	-0.223852	0.420583	-0.166565	0.423349
TRINITY_DN10767_c0_g1	Mitochondrial intermediate peptidase	-0.289239	0.688156	0.282134	0.68647	0.571373	0.213904
TRINITY_DN10767_c0_g3	Calcium-dependent secretion activator 1	0.819986	0.407067	1.11363	0.184557	0.293647	0.554297
TRINITY_DN10769_c0_g1	medium-chain specific acyl-CoA dehydrogenase, mitochondrial	0.776806	0.280752	0.440419	0.570356	-0.336387	0.48615
TRINITY_DN1077_c0_g1	mast cell protease 1A-like	0.0357988	0.9846	-2.13871	0.108568	-2.17451	0.0394934
TRINITY_DN1077_c0_g1	cathepsin G-like	0.0357988	0.9846	-2.13871	0.108568	-2.17451	0.0394934
TRINITY_DN10771_c0_g1	DNA damage-inducible transcript 4 protein	-0.242804	0.618471	0.326688	0.466295	0.569491	0.0687541
TRINITY_DN10771_c1_g1	SH2 domain-containing protein 4B	-0.126594	0.836055	-0.469174	0.365672	-0.34258	0.385616
TRINITY_DN10773_c0_g1	---NA---	0.389774	0.443558	0.454675	0.354819	0.0649015	0.876697
TRINITY_DN10774_c0_g1	protein FAN	-0.325439	0.519615	-0.274899	0.601911	0.05054	0.909647
TRINITY_DN10775_c0_g1	aquaporin-1	0.321342	0.404357	0.0183852	0.973903	-0.302957	0.288473
TRINITY_DN10775_c0_g1	Putative phospholipid-transporting ATPase VB	0.321342	0.404357	0.0183852	0.973903	-0.302957	0.288473
TRINITY_DN10776_c0_g1	condensin-2 complex subunit G2	-0.424363	0.481269	-0.444034	0.471097	-0.0196712	0.972728
TRINITY_DN10776_c0_g2	---NA---	-0.245675	0.723134	-0.652317	0.313744	-0.406642	0.43075
TRINITY_DN10777_c1_g1	zinc finger and SCAN domain-containing protein 20-like	-0.280878	0.610449	-0.0693005	0.92014	0.211577	0.605021
TRINITY_DN10778_c0_g1	zinc finger protein 135-like	-0.110305	0.864721	-0.139	0.828928	-0.0286948	0.952048
TRINITY_DN1078_c0_g1	transmembrane protein 272 isoform X5	0.286837	0.665187	-0.282691	0.689365	-0.569528	0.207643
TRINITY_DN10780_c0_g1	---NA---	0.805131	0.184458	-0.266498	0.735335	-1.07163	0.0256017
TRINITY_DN10780_c0_g2	oxidative stress-induced growth inhibitor 1	0.347623	0.403058	0.195683	0.67782	-0.15194	0.647421
TRINITY_DN10780_c0_g3	---NA---	0.395033	0.543471	0.0149273	0.987235	-0.380106	0.415473
TRINITY_DN10780_c1_g2	protein FAM208B isoform X1	0.00731026	0.991841	-0.224604	0.716739	-0.231914	0.582771
TRINITY_DN10781_c0_g1	---NA---	0.388674	0.70507	-1.50899	0.309073	-1.89767	0.109405
TRINITY_DN10781_c1_g1	histone deacetylase 5	-0.216931	0.78836	-1.36048	0.0884211	-1.14355	0.0808308
TRINITY_DN10782_c0_g1	AP-2 complex subunit mu-like	0.173427	0.716353	-0.416824	0.349481	-0.590251	0.0684801
TRINITY_DN10786_c0_g1	NADH dehydrogenase subunit 5 (mitochondrion)	-0.0254757	0.957659	-0.459164	0.16957	-0.433688	0.0884505
TRINITY_DN10788_c5_g1	---NA---	-0.116119	0.854364	-0.138267	0.829369	-0.0221481	0.963204
TRINITY_DN1079_c0_g1	spermatogenesis-defective protein 39 homolog	-0.0555619	0.868352	-0.155835	0.598188	-0.100273	0.647726
TRINITY_DN1079_c0_g1	spermatogenesis-defective protein 39 homolog isoform X1	-0.0555619	0.868352	-0.155835	0.598188	-0.100273	0.647726
TRINITY_DN1079_c1_g1	centrosomal protein of 70 kDa isoform X1	0.20017	0.57075	0.126972	0.743904	-0.0731979	0.791992
TRINITY_DN1079_c1_g1	Extended synaptotagmin-3	0.20017	0.57075	0.126972	0.743904	-0.0731979	0.791992
TRINITY_DN1079_c1_g2	sarcoplasmic/endoplasmic reticulum calcium ATPase 3 isoform X2	0.208116	0.661516	0.332523	0.450971	0.124407	0.721936
TRINITY_DN1079_c1_g2	sarcoplasmic/endoplasmic reticulum calcium ATPase 3 isoform X1	0.208116	0.661516	0.332523	0.450971	0.124407	0.721936
TRINITY_DN10790_c0_g2	Zinc finger and SCAN domain-containing protein 20	-0.0703254	0.864663	-0.509639	0.120775	-0.439314	0.085881
TRINITY_DN10792_c0_g1	leucine-rich repeat-containing protein 28	0.0275992	0.920226	0.157713	0.456726	0.130114	0.398887
TRINITY_DN10792_c0_g1	leucine-rich repeat-containing protein 28 isoform X1	0.0275992	0.920226	0.157713	0.456726	0.130114	0.398887
TRINITY_DN10792_c1_g1	Zinc finger and SCAN domain-containing protein 29	-0.159203	0.763048	-0.290955	0.560223	-0.131753	0.737593
TRINITY_DN10793_c0_g1	hypothetical protein UY3_02841	0.865199	0.403793	-0.578165	0.705086	-1.44336	0.128551
TRINITY_DN107938_c0_g1	T cell receptor beta variable 12-5	-0.103126	0.850242	0.226991	0.635164	0.330117	0.303692
TRINITY_DN10794_c0_g1	---NA---	0.54608	0.511401	-0.242158	0.821132	-0.788238	0.182836
TRINITY_DN10796_c0_g1	tripartite motif-containing protein 15-like	0.0345546	0.97636	-0.300597	0.765954	-0.335152	0.625297
TRINITY_DN10797_c0_g1	RNA-directed DNA polymerase from mobile element jockey-like	0.323432	0.210259	0.0242018	0.949428	-0.29923	0.125992
TRINITY_DN10797_c3_g1	rna-directed dna polymerase from mobile element jockey-like	-0.303828	0.492483	-0.420729	0.334069	-0.116901	0.754797
TRINITY_DN10798_c0_g1	Nuclear receptor subfamily 2 group F member 6	-0.11674	0.741658	-0.429639	0.156759	-0.312899	0.18426
TRINITY_DN107985_c0_g1	peptidyl-prolyl cis-trans isomerase-like 6 isoform X2	2.34858	0.37131	2.74543	0.202794	0.396852	0.606948
TRINITY_DN107989_c0_g1	lysophosphatidic acid receptor 6-like	0.293382	0.612608	-0.0253368	0.9741	-0.318719	0.434769
TRINITY_DN108_c0_g1	transcription factor 25	0.0226015	0.954153	-0.455983	0.09147	-0.478584	0.0228611
TRINITY_DN108_c0_g2	---NA---	-0.325909	0.518507	-0.0914279	0.88373	0.234481	0.535764
TRINITY_DN108_c1_g1	---NA---	-0.143963	0.777953	-0.0873579	0.879412	0.056605	0.883533
TRINITY_DN108_c1_g2	zinc finger protein 592 isoform X2	-0.018262	0.963217	0.068539	0.85235	0.086801	0.711001
TRINITY_DN108_c2_g1	mitoguardin 2 isoform X1	-0.216356	0.172919	-0.200198	0.220418	0.0161581	0.916353
TRINITY_DN108_c3_g1	phosphatase and actin regulator 4 isoform X3	-0.174384	0.559548	-0.269405	0.344362	-0.095021	0.686611
TRINITY_DN108_c5_g1	---NA---	-0.469977	0.169098	-0.126465	0.765966	0.343512	0.197221
TRINITY_DN108_c8_g1	---NA---	0.39417	0.556936	0.205103	0.782616	-0.189067	0.67657
TRINITY_DN1080_c0_g2	Peroxisomal multifunctional enzyme type 2	0.530627	0.820972	-1.46159	0.654551	-1.99221	0.402345
TRINITY_DN1080_c0_g5	---NA---	0.00775922	0.98478	-0.407883	0.143755	-0.415643	0.052012
TRINITY_DN1080_c1_g1	Ras-related protein Rab-6A	0.571533	0.663963	0.184404	0.908184	-0.387129	0.659363
TRINITY_DN1080_c1_g2	WD repeat domain phosphoinositide-interacting protein 3 isoform X2	0.95793	0.308805	1.41744	0.0727689	0.459509	0.284777
TRINITY_DN1080_c2_g1	---NA---	0.486087	0.113566	0.710292	0.0173969	0.224205	0.327982
TRINITY_DN1080_c3_g1	beta-secretase 1	0.146164	0.671286	-0.329745	0.303218	-0.475909	0.0416795
TRINITY_DN1080_c5_g1	1-phosphatidylinositol-4,5-bisphosphate phosphodiesterase beta-4	0.167815	0.716576	-0.145688	0.770546	-0.313503	0.303999
TRINITY_DN10800_c0_g1	6-phosphofructo-2-kinase/fructose-2,6-bisphosphatase 2 isoform X1	0.380367	0.60073	-0.387231	0.639678	-0.767597	0.151552
TRINITY_DN10800_c0_g3	---NA---	0.884071	0.192911	0.141095	0.882096	-0.742976	0.113811
TRINITY_DN10800_c3_g1	Sideroflexin-5	0.683592	0.504877	1.02192	0.242233	0.338329	0.54162
TRINITY_DN10800_c6_g1	hypothetical protein UY3_11722	0.583149	0.845125	0.528358	0.85287	-0.0547914	0.973775
TRINITY_DN108017_c0_g2	---NA---	-0.0160832	0.985126	0.0535007	0.949388	0.0695839	0.895783
TRINITY_DN108019_c0_g2	clathrin interactor 1	-0.309488	0.0977765	-0.0532408	0.830214	0.256247	0.0771885
TRINITY_DN10802_c0_g1	taperin	0.342169	0.289695	-0.604816	0.0701565	-0.946985	0.000507921
TRINITY_DN10804_c0_g1	COPII coat assembly protein sec16-like	0.47679	0.463056	0.32023	0.648936	-0.15656	0.760133
TRINITY_DN10804_c0_g1	rho guanine nucleotide exchange factor 5	0.47679	0.463056	0.32023	0.648936	-0.15656	0.760133
TRINITY_DN10805_c0_g1	DLA class II histocompatibility antigen, DR-1 beta chain-like	0.256694	0.815588	0.254047	0.820753	-0.00264695	0.998076
TRINITY_DN108053_c0_g1	perforin-1	0.559645	0.446149	-0.416892	0.620458	-0.976537	0.0758213
TRINITY_DN10806_c0_g1	lambda-crystallin homolog	0.169605	0.755798	0.578875	0.18433	0.40927	0.206355
TRINITY_DN10809_c1_g1	---NA---	0.610146	0.420725	-0.0167182	0.988434	-0.626864	0.208675
TRINITY_DN1081_c0_g2	RNA-directed DNA polymerase from mobile element jockey-like	-0.334116	0.439553	-0.219615	0.643233	0.114501	0.752904
TRINITY_DN1081_c0_g3	uncharacterized protein C3orf67 homolog	-0.135384	0.701918	0.439615	0.127859	0.574999	0.00940138
TRINITY_DN10810_c0_g1	ELMO domain-containing protein 2	0.651539	0.532546	0.529774	0.60701	-0.121765	0.864288
TRINITY_DN108106_c0_g1	---NA---	0.38042	0.714076	-0.0734906	0.954603	-0.453911	0.477856
TRINITY_DN10811_c0_g1	G-protein coupled receptor 55-like	0.777775	0.329117	-1.82041	0.111594	-2.59818	0.00714354
TRINITY_DN10812_c0_g2	---NA---	-0.423883	0.391028	-0.278656	0.590083	0.145227	0.728771
TRINITY_DN10812_c1_g1	mitochondrial import inner membrane translocase subunit Tim8 B	-0.264238	0.425807	0.0214382	0.963204	0.285676	0.234971
TRINITY_DN10814_c0_g1	40S ribosomal protein S10	0.0161733	0.976405	-0.872252	0.0359317	-0.888425	0.00920652
TRINITY_DN10815_c0_g1	TATA box-binding protein-associated factor RNA polymerase I subunit A isoform X2	0.067632	0.896098	-0.125835	0.799718	-0.193467	0.540826
TRINITY_DN10816_c0_g1	E3 ubiquitin-protein ligase TRIM39-like	0.0645549	0.972433	-0.846563	0.596919	-0.911118	0.434492
TRINITY_DN10818_c0_g1	Hemoglobin subunit alpha-2	0.202412	0.34641	0.301737	0.138899	0.0993251	0.545211
TRINITY_DN10819_c0_g1	---NA---	-0.663921	0.426632	-0.0929646	0.931578	0.570956	0.369407
TRINITY_DN1082_c0_g1	Biliverdin reductase A	-0.213922	0.328778	-0.100012	0.697801	0.11391	0.517301
TRINITY_DN1082_c0_g2	---NA---	-0.120814	0.869297	-0.368825	0.571833	-0.248011	0.613537
TRINITY_DN108205_c0_g1	---NA---	0.299729	0.733128	0.06455	0.952526	-0.235178	0.706157
TRINITY_DN10822_c0_g1	mitochondrial amidoxime reducing component 2-like	-0.126127	0.828953	-0.371121	0.475804	-0.244994	0.539901
TRINITY_DN10823_c0_g1	---NA---	-0.318425	0.421157	-0.203182	0.641056	0.115243	0.72748
TRINITY_DN10825_c0_g1	O-acetyl-ADP-ribose deacetylase MACROD1	-0.314442	0.568574	-0.551642	0.294207	-0.2372	0.57937
TRINITY_DN10826_c1_g1	---NA---	0.488846	0.632021	-0.625549	0.609373	-1.11439	0.179189
TRINITY_DN10827_c0_g1	Mamu class II histocompatibility antigen, DR alpha chain	0.511273	0.540022	-0.434498	0.656419	-0.945771	0.135417
TRINITY_DN10827_c1_g1	Ubiquitin-conjugating enzyme E2 A	0.130041	0.815266	1.34319	0.00108976	1.21315	0.000130811
TRINITY_DN108270_c0_g1	C-type lectin domain family 2 member L	-0.296931	0.714249	0.20425	0.7998	0.501181	0.315419
TRINITY_DN10828_c0_g1	syntaxin-binding protein 4-like	0.108886	0.899664	0.209983	0.794728	0.101096	0.859706
TRINITY_DN1083_c0_g1	Protein EMSY	-0.170717	0.330232	-0.0375329	0.874965	0.133184	0.321695
TRINITY_DN1083_c1_g1	transmembrane protein 53 isoform X1	0.253896	0.198022	0.232517	0.245524	-0.0213797	0.905261
TRINITY_DN1083_c13_g1	Putative phospholipid-transporting ATPase VB	-0.141351	0.751008	-0.510927	0.18217	-0.369575	0.213362
TRINITY_DN1083_c2_g1	zinc finger BED domain-containing protein 1-like	-0.0611849	0.878871	0.0903632	0.81703	0.151548	0.536511
TRINITY_DN1083_c4_g1	UPF0594 protein C13orf38 like protein	-0.304476	0.557756	0.352126	0.465783	0.656601	0.0519617
TRINITY_DN1083_c8_g1	---NA---	0.382793	0.796984	0.423584	0.75435	0.040791	0.966031
TRINITY_DN10830_c0_g1	tyrosine-protein kinase CSK	-0.0477171	0.924531	-0.0328639	0.949982	0.0148532	0.966241
TRINITY_DN10832_c1_g1	E3 SUMO-protein ligase RanBP2	0.203107	0.860129	0.722894	0.390098	0.519786	0.360936
TRINITY_DN10833_c0_g1	---NA---	0.734899	0.281731	0.675998	0.308252	-0.0589011	0.911715
TRINITY_DN10833_c0_g3	---NA---	-0.446931	0.403058	0.0265425	0.971867	0.473474	0.225146
TRINITY_DN10833_c1_g2	---NA---	-0.249737	0.641495	-0.661791	0.190297	-0.412053	0.311741
TRINITY_DN10833_c2_g1	ras-related protein Rab-1A isoform X2	-0.0331719	0.95618	-0.492392	0.263862	-0.45922	0.166027
TRINITY_DN10833_c5_g2	---NA---	0.132358	0.761883	0.201387	0.622141	0.0690289	0.828194
TRINITY_DN10833_c7_g1	hypothetical protein parPi_0010235	0.325964	0.705514	1.31121	0.050211	0.985244	0.0452165
TRINITY_DN10834_c0_g1	Calcium-dependent secretion activator 1	0.0882242	0.940854	-0.379115	0.734199	-0.467339	0.536534
TRINITY_DN108348_c0_g1	Androgen receptor	0.0763179	0.912217	-0.527195	0.33615	-0.603513	0.135512
TRINITY_DN108348_c1_g2	ADP-ribosylation factor-like protein 15	0.0720382	0.920252	0.00461561	0.995439	-0.0674226	0.883862
TRINITY_DN10835_c0_g1	---NA---	0.309723	0.575248	0.406876	0.436398	0.0971536	0.820025
TRINITY_DN10836_c0_g1	zinc finger protein OZF-like isoform X1	0.626486	0.260683	0.512225	0.356588	-0.114261	0.785318
TRINITY_DN10838_c0_g2	rna-directed dna polymerase from mobile element jockey-like	-0.454813	0.402228	0.314673	0.551006	0.769487	0.0353686
TRINITY_DN10838_c0_g4	RNA-directed DNA polymerase from mobile element jockey	0.690494	0.307191	-0.34808	0.70961	-1.03857	0.0679149
TRINITY_DN10839_c0_g1	methylosome subunit pICln	-0.0822799	0.750686	-0.00531732	0.987252	0.0769625	0.672427
TRINITY_DN10839_c0_g1	---NA---	-0.0822799	0.750686	-0.00531732	0.987252	0.0769625	0.672427
TRINITY_DN1084_c0_g1	kinase suppressor of Ras 1 isoform X1	-0.0595352	0.867762	0.0695409	0.849845	0.129076	0.563819
TRINITY_DN1084_c0_g1	hypothetical protein UY3_12382	-0.0595352	0.867762	0.0695409	0.849845	0.129076	0.563819
TRINITY_DN1084_c0_g2	sphingomyelin phosphodiesterase 4 isoform X1	0.0508964	0.822154	0.273662	0.117545	0.222765	0.093494
TRINITY_DN1084_c0_g2	Sphingomyelin phosphodiesterase 4	0.0508964	0.822154	0.273662	0.117545	0.222765	0.093494
TRINITY_DN1084_c0_g4	Dynein heavy chain 6, axonemal	0.0715881	0.849324	0.303536	0.305779	0.231948	0.287788
TRINITY_DN1084_c0_g5	cytosolic carboxypeptidase 1 isoform X1	0.936386	0.0105325	0.682528	0.0629174	-0.253858	0.37083
TRINITY_DN1084_c1_g1	regulator of hemoglobinization and erythroid cell expansion protein	0.547439	0.311732	0.387381	0.500874	-0.160058	0.713444
TRINITY_DN1084_c3_g1	T-cell receptor alpha chain V region RL-5	0.25103	0.739521	0.76346	0.209456	0.51243	0.249147
TRINITY_DN1084_c5_g1	Leucine-rich repeat-containing protein 49	0.601424	0.357837	1.19877	0.0343141	0.597346	0.110919
TRINITY_DN10840_c0_g1	Transmembrane and coiled-coil domain-containing protein 4	0.0723828	0.936042	-0.673545	0.343552	-0.745928	0.159923
TRINITY_DN10840_c1_g3	major facilitator superfamily domain-containing protein 12	-0.0760624	0.899094	-0.853127	0.0787766	-0.777065	0.0445744
TRINITY_DN10842_c0_g1	single-stranded DNA-binding protein 3	0.205251	0.63789	-0.197008	0.667907	-0.402258	0.176747
TRINITY_DN10843_c0_g1	G-protein coupled receptor 35-like	0.218387	0.727304	-0.727556	0.198064	-0.945943	0.0274611
TRINITY_DN108451_c0_g2	---NA---	0.232943	0.720405	0.63291	0.244994	0.399967	0.323157
TRINITY_DN10846_c0_g1	---NA---	0.997373	0.124022	0.2656	0.744466	-0.731773	0.114389
TRINITY_DN10847_c0_g3	---NA---	-0.346326	0.491203	-0.342952	0.503721	0.00337423	0.995416
TRINITY_DN10847_c2_g1	bolA-like protein 3	0.323576	0.744059	1.0619	0.130725	0.738328	0.0953026
TRINITY_DN10849_c0_g1	Voltage-dependent anion-selective channel protein 2	-0.191552	0.557139	0.0635802	0.874171	0.255132	0.252162
TRINITY_DN1085_c0_g1	protein FAM208B isoform X1	-0.0786608	0.883235	-0.148536	0.771863	-0.0698755	0.851779
TRINITY_DN10850_c0_g1	---NA---	0.0613035	0.951064	-0.309143	0.724216	-0.370447	0.51979
TRINITY_DN10850_c0_g1	midnolin	0.0613035	0.951064	-0.309143	0.724216	-0.370447	0.51979
TRINITY_DN10854_c0_g1	FAD-dependent oxidoreductase domain-containing protein 1	-0.0794132	0.899107	-0.84645	0.0810589	-0.767037	0.0444136
TRINITY_DN108541_c0_g1	---NA---	-0.857933	0.484919	1.03663	0.222829	1.89457	0.00959221
TRINITY_DN10855_c0_g2	TRPM8 channel-associated factor 2	3.3249	0.00213095	1.70419	0.116444	-1.62071	0.0194765
TRINITY_DN10856_c0_g1	---NA---	0.348325	0.218478	-0.803529	0.00744701	-1.15185	1.27031e-05
TRINITY_DN1086_c0_g1	ran-binding protein 3 isoform X4	-0.210073	0.190341	-0.1288	0.460884	0.0812729	0.541387
TRINITY_DN1086_c0_g2	hypothetical protein UY3_11361	-0.161402	0.867731	0.235864	0.785054	0.397266	0.455582
TRINITY_DN1086_c0_g3	---NA---	-0.0298045	0.921281	-0.0401088	0.895258	-0.0103044	0.960729
TRINITY_DN10860_c0_g1	NADH dehydrogenase [ubiquinone] 1 beta subcomplex subunit 11, mitochondrial-like	-0.134886	0.791199	0.114291	0.828261	0.249177	0.436754
TRINITY_DN10860_c0_g1	NADH dehydrogenase [ubiquinone] 1 beta subcomplex subunit 11, mitochondrial	-0.134886	0.791199	0.114291	0.828261	0.249177	0.436754
TRINITY_DN10863_c0_g1	cilia- and flagella-associated protein 65	0.249424	0.822853	-0.910106	0.44277	-1.15953	0.185575
TRINITY_DN10863_c2_g1	---NA---	0.126306	0.799946	-0.349086	0.428578	-0.475392	0.12884
TRINITY_DN10864_c0_g1	Transposon Tf2-9 polyprotein	0.145402	0.779541	0.094925	0.870773	-0.0504766	0.896637
TRINITY_DN10864_c1_g1	uncharacterized protein LOC114019908 isoform X2	-0.413543	0.337726	-0.764913	0.0775025	-0.351371	0.328886
TRINITY_DN10865_c0_g2	---NA---	-1.33133	0.0291027	-1.09821	0.0767767	0.233125	0.691941
TRINITY_DN10866_c0_g1	leucine-rich repeat-containing protein 25	0.501153	0.249675	0.393181	0.387954	-0.107972	0.769039
TRINITY_DN10867_c0_g1	vacuolar protein sorting-associated protein 54 isoform X1	0.904444	0.361956	0.957659	0.296549	0.0532143	0.938333
TRINITY_DN108675_c0_g1	CD9	-0.518796	0.479213	-0.169486	0.84554	0.34931	0.538093
TRINITY_DN10868_c0_g1	---NA---	-0.154756	0.836155	-0.280666	0.693844	-0.12591	0.815363
TRINITY_DN10868_c0_g2	---NA---	0.390203	0.420802	0.930408	0.0300958	0.540205	0.0868183
TRINITY_DN10869_c0_g1	COP9 signalosome complex subunit 9	-0.361534	0.255999	-0.222949	0.523226	0.138585	0.603548
TRINITY_DN1087_c0_g1	prostaglandin E synthase 3	-0.298557	0.0451805	-0.424361	0.00602241	-0.125805	0.30832
TRINITY_DN10870_c0_g1	tetratricopeptide repeat protein 30B	-0.288142	0.35459	0.234289	0.459038	0.522432	0.0194639
TRINITY_DN10871_c0_g1	DNA repair protein RAD51 homolog 2 isoform X1	-0.431752	0.294376	-0.203445	0.667892	0.228307	0.49197
TRINITY_DN10871_c0_g1	---NA---	-0.431752	0.294376	-0.203445	0.667892	0.228307	0.49197
TRINITY_DN10875_c0_g1	---NA---	0.779285	0.203134	-0.499296	0.513333	-1.27858	0.0161001
TRINITY_DN10876_c0_g1	T-cell surface protein tactile isoform X2	0.146524	0.756916	0.416273	0.286939	0.26975	0.35212
TRINITY_DN10878_c0_g1	---NA---	0.67432	0.414736	0.250449	0.801436	-0.423871	0.448583
TRINITY_DN1088_c0_g1	---NA---	-0.12116	0.823237	0.711128	0.0734369	0.832288	0.00653422
TRINITY_DN1088_c0_g2	---NA---	-0.0376557	0.962438	-0.404963	0.52963	-0.367308	0.440257
TRINITY_DN1088_c0_g3	---NA---	-0.053733	0.863101	-0.0175122	0.960904	0.0362208	0.868847
TRINITY_DN1088_c0_g4	---NA---	-0.1434	0.742469	0.919086	0.00642936	1.06249	0.000115108
TRINITY_DN108805_c0_g1	T-complex protein 11 homolog	-0.369656	0.515463	0.0463335	0.950119	0.415989	0.299215
TRINITY_DN108807_c0_g1	---NA---	-0.308542	0.635291	-0.631986	0.338393	-0.323444	0.56191
TRINITY_DN10881_c0_g2	Polymerase delta-interacting protein 3	0.100048	0.87469	-0.160957	0.796968	-0.261005	0.504928
TRINITY_DN10882_c0_g1	disabled homolog 2 isoform X1	-0.439201	0.641263	-0.170556	0.880802	0.268646	0.71146
TRINITY_DN10883_c0_g1	protein Dr1	-0.372008	0.0626929	-0.383169	0.059634	-0.0111614	0.956403
TRINITY_DN10883_c0_g1	protein Dr1 isoform X1	-0.372008	0.0626929	-0.383169	0.059634	-0.0111614	0.956403
TRINITY_DN108832_c0_g1	protein YIPF2	0.431862	0.594826	-0.0857263	0.937327	-0.517588	0.356141
TRINITY_DN10884_c0_g1	programmed cell death protein 7	0.385506	0.683444	0.518102	0.535691	0.132596	0.82482
TRINITY_DN108851_c0_g1	hypothetical protein UY3_06269	0.773829	0.508088	0.0797778	0.962732	-0.694051	0.391387
TRINITY_DN10886_c0_g1	---NA---	-0.349574	0.21967	-0.414244	0.150188	-0.06467	0.80704
TRINITY_DN10886_c0_g2	sIgD	0.493711	0.189474	0.108164	0.828694	-0.385547	0.177047
TRINITY_DN10886_c1_g1	---NA---	-0.288956	0.692614	-0.140641	0.866522	0.148316	0.791023
TRINITY_DN108869_c0_g1	protein FAM208B isoform X1	0.592167	0.374945	0.00797572	0.994161	-0.584191	0.204315
TRINITY_DN10887_c0_g1	---NA---	0.792466	0.193826	0.152895	0.854439	-0.639571	0.139907
TRINITY_DN10888_c0_g1	ribosomal L1 domain-containing protein 1	0.0586887	0.878871	-0.375273	0.221213	-0.433962	0.0587165
TRINITY_DN10888_c1_g1	RNA-directed DNA polymerase from mobile element jockey-like	1.31584	0.0564808	1.12311	0.0783112	-0.192731	0.632057
TRINITY_DN108881_c0_g1	Vasculin-like protein 1	-0.327028	0.449719	0.390866	0.318221	0.717894	0.012793
TRINITY_DN10889_c0_g1	F-box only protein 36	0.0504932	0.91898	-0.360172	0.348435	-0.410665	0.143991
TRINITY_DN1089_c0_g1	1-phosphatidylinositol 4,5-bisphosphate phosphodiesterase gamma-2	-0.00563442	0.989267	0.363551	0.20569	0.369185	0.0832621
TRINITY_DN108908_c0_g1	Splicing factor 3A subunit 2	0.194795	0.719698	0.602477	0.147243	0.407682	0.155687
TRINITY_DN108910_c0_g1	Ubiquitin-conjugating enzyme E2 variant 2	-0.561328	0.253074	-0.852176	0.106129	-0.290848	0.546339
TRINITY_DN108912_c0_g1	methionine aminopeptidase 2	0.427577	0.490498	-0.0849142	0.919966	-0.512492	0.240902
TRINITY_DN10895_c0_g1	erlin-1	-0.0615001	0.786396	-0.141628	0.480506	-0.0801277	0.602934
TRINITY_DN10895_c0_g1	erlin-1 isoform X1	-0.0615001	0.786396	-0.141628	0.480506	-0.0801277	0.602934
TRINITY_DN10895_c1_g1	vesicle transport through interaction with t-SNAREs homolog 1A isoform X4	-0.193299	0.454986	-0.0746054	0.810503	0.118693	0.550007
TRINITY_DN10895_c1_g1	---NA---	-0.193299	0.454986	-0.0746054	0.810503	0.118693	0.550007
TRINITY_DN10895_c1_g2	vesicle transport through interaction with t-SNAREs homolog 1A isoform X3	-0.137784	0.64573	-0.241623	0.387591	-0.103839	0.641843
TRINITY_DN10895_c2_g1	---NA---	0.214822	0.568397	0.194493	0.612412	-0.0203293	0.948769
TRINITY_DN10897_c0_g1	SUN domain-containing protein 1 isoform X1	-0.192717	0.845898	-0.391923	0.674258	-0.199206	0.781722
TRINITY_DN10897_c0_g2	general transcription factor 3C polypeptide 1	0.11799	0.591754	0.161624	0.441033	0.0436335	0.800637
TRINITY_DN10897_c0_g2	rna-directed dna polymerase from mobile element jockey-like	0.11799	0.591754	0.161624	0.441033	0.0436335	0.800637
TRINITY_DN10897_c1_g1	rna-directed dna polymerase from mobile element jockey-like	-0.174268	0.802472	-0.641301	0.315638	-0.467033	0.361696
TRINITY_DN108971_c0_g1	centromere protein K isoform X2	0.350441	0.602064	0.282427	0.67987	-0.0680137	0.892599
TRINITY_DN10898_c2_g1	RNA-directed DNA polymerase from mobile element jockey-like	0.171733	0.860005	-0.363704	0.703672	-0.535436	0.405092
TRINITY_DN109_c0_g1	leucine-rich repeat-containing protein 45	0.115456	0.635633	-0.217542	0.337476	-0.332998	0.0432184
TRINITY_DN109_c0_g1	Leucine-rich repeat-containing protein 45	0.115456	0.635633	-0.217542	0.337476	-0.332998	0.0432184
TRINITY_DN109_c0_g2	Olfactory receptor 6Y1	0.0419524	0.897677	-0.11949	0.679087	-0.161442	0.404972
TRINITY_DN109_c1_g1	max-like protein X	0.120541	0.57075	0.215916	0.267211	0.0953752	0.534024
TRINITY_DN109_c2_g1	Integrin alpha-8	-0.165986	0.777461	-0.0563182	0.934765	0.109667	0.796995
TRINITY_DN109_c3_g1	inositol hexakisphosphate kinase 3 isoform X1	0.55645	0.442743	-1.01092	0.186205	-1.56737	0.00798626
TRINITY_DN109_c4_g1	RNA-binding protein 39-like isoform X2	-0.145549	0.638194	0.370184	0.155798	0.515733	0.00954635
TRINITY_DN109_c4_g1	Protein scribble like protein	-0.145549	0.638194	0.370184	0.155798	0.515733	0.00954635
TRINITY_DN1090_c0_g1	integral membrane protein GPR155 isoform X1	0.34314	0.208655	0.306781	0.274095	-0.0363584	0.884779
TRINITY_DN1090_c0_g2	integral membrane protein GPR155 isoform X2	0.618097	0.0669115	0.390562	0.270744	-0.227536	0.385644
TRINITY_DN1090_c0_g2	---NA---	0.618097	0.0669115	0.390562	0.270744	-0.227536	0.385644
TRINITY_DN1090_c0_g3	Hematological and neurological expressed 1 protein	-0.150967	0.603168	0.0140791	0.970691	0.165046	0.416072
TRINITY_DN1090_c1_g1	28S ribosomal protein S25, mitochondrial	0.0646137	0.840801	0.0906836	0.771717	0.0260699	0.910369
TRINITY_DN10900_c0_g1	---NA---	-0.523472	0.421026	-2.00034	0.0396387	-1.47687	0.0820065
TRINITY_DN10900_c0_g2	---NA---	-0.968499	0.398233	-2.54157	0.0434293	-1.57308	0.138595
TRINITY_DN10901_c0_g2	RNA-directed DNA polymerase from mobile element jockey-like	-0.0531723	0.918781	0.394129	0.29698	0.447301	0.102129
TRINITY_DN10901_c0_g2	rna-directed dna polymerase from mobile element jockey-like	-0.0531723	0.918781	0.394129	0.29698	0.447301	0.102129
TRINITY_DN10901_c0_g2	Dual specificity protein phosphatase 12	-0.0531723	0.918781	0.394129	0.29698	0.447301	0.102129
TRINITY_DN10903_c0_g1	IQ domain-containing protein E	-0.00594541	0.993228	0.250733	0.676065	0.256678	0.531349
TRINITY_DN10904_c0_g1	kinase D-interacting substrate of 220 kDa isoform X1	-0.222507	0.285528	0.227804	0.272171	0.450311	0.0041514
TRINITY_DN10904_c0_g3	rna-directed dna polymerase from mobile element jockey-like	0.194903	0.694651	0.00784888	0.990733	-0.187054	0.578995
TRINITY_DN109046_c0_g1	---NA---	0.0625105	0.92736	-0.042391	0.952526	-0.104902	0.80914
TRINITY_DN10905_c0_g1	28S ribosomal protein S26, mitochondrial	-0.215441	0.490714	-0.101242	0.782176	0.1142	0.640435
TRINITY_DN109050_c1_g1	---NA---	-0.140283	0.746544	0.176921	0.670119	0.317204	0.244359
TRINITY_DN10906_c0_g1	macrophage erythroblast attacher isoform X1	-0.239636	0.25289	0.310787	0.122899	0.550423	0.00068877
TRINITY_DN10906_c0_g1	macrophage erythroblast attacher isoform X3	-0.239636	0.25289	0.310787	0.122899	0.550423	0.00068877
TRINITY_DN10906_c0_g1	Macrophage erythroblast attacher	-0.239636	0.25289	0.310787	0.122899	0.550423	0.00068877
TRINITY_DN10906_c0_g1	macrophage erythroblast attacher isoform X2	-0.239636	0.25289	0.310787	0.122899	0.550423	0.00068877
TRINITY_DN109065_c0_g1	drebrin-like	1.07766	0.138917	-0.637222	0.532801	-1.71488	0.0133008
TRINITY_DN109066_c0_g1	protein MANBAL	0.114255	0.719563	0.537331	0.0345295	0.423075	0.0273353
TRINITY_DN10907_c0_g1	Homeobox protein PKNOX1	0.210564	0.673939	0.169158	0.748823	-0.041406	0.916353
TRINITY_DN10907_c1_g1	---NA---	0.829536	0.494777	-0.141832	0.931885	-0.971368	0.191366
TRINITY_DN10908_c0_g1	MAGUK p55 subfamily member 7	-0.0195845	0.988011	0.837686	0.309553	0.857271	0.125276
TRINITY_DN1091_c0_g1	Putative phospholipid-transporting ATPase VB	0.103856	0.502098	-0.0195877	0.92449	-0.123444	0.266321
TRINITY_DN1091_c0_g1	cytoplasmic dynein 1 light intermediate chain 2	0.103856	0.502098	-0.0195877	0.92449	-0.123444	0.266321
TRINITY_DN1091_c0_g1	RNA-binding protein EWS	0.103856	0.502098	-0.0195877	0.92449	-0.123444	0.266321
TRINITY_DN1091_c0_g2	rna-directed dna polymerase from mobile element jockey-like	0.156026	0.798957	-0.312169	0.589058	-0.468195	0.230552
TRINITY_DN1091_c0_g3	Putative olfactory receptor 52P1	0.0826192	0.838066	-0.161909	0.667027	-0.244528	0.330757
TRINITY_DN1091_c1_g1	putative homeodomain transcription factor 1 isoform X1	-0.0445718	0.899243	-0.210062	0.462506	-0.16549	0.436401
TRINITY_DN1091_c1_g2	---NA---	0.0324181	0.938562	0.12553	0.719797	0.0931119	0.704754
TRINITY_DN1091_c2_g1	hypothetical protein UY3_09047	-0.0560049	0.846495	0.0841221	0.75853	0.140127	0.424186
TRINITY_DN10910_c0_g1	---NA---	-0.0561728	0.942665	-0.66318	0.308583	-0.607007	0.230176
TRINITY_DN10911_c0_g1	Thyroid hormone receptor beta	-0.252819	0.353052	-0.379245	0.155779	-0.126426	0.572368
TRINITY_DN10911_c0_g1	Transcription initiation factor TFIID subunit 4B	-0.252819	0.353052	-0.379245	0.155779	-0.126426	0.572368
TRINITY_DN10911_c1_g1	zinc finger protein Rlf isoform X1	0.24569	0.666299	0.0827039	0.905738	-0.162986	0.688884
TRINITY_DN10912_c0_g1	---NA---	0.684507	0.0994672	0.451807	0.299477	-0.2327	0.466116
TRINITY_DN10912_c1_g1	---NA---	0.193519	0.719973	-0.247089	0.649623	-0.440608	0.22085
TRINITY_DN109123_c0_g1	tumor necrosis factor receptor superfamily member 5-like	-0.0434569	0.97864	1.53943	0.118728	1.58289	0.0279522
TRINITY_DN109123_c0_g1	tumor necrosis factor receptor superfamily member 14 isoform X1	-0.0434569	0.97864	1.53943	0.118728	1.58289	0.0279522
TRINITY_DN10913_c0_g4	uncharacterized protein LOC103305703	-1.51238	0.0425009	-2.17365	0.0317756	-0.661269	0.507438
TRINITY_DN10913_c1_g1	Hepatocyte growth factor activator	0.699176	0.310083	0.240624	0.775599	-0.458552	0.330438
TRINITY_DN10913_c3_g1	Basic immunoglobulin-like variable motif-containing protein	-0.154656	0.760198	-0.280331	0.557248	-0.125676	0.739279
TRINITY_DN10915_c0_g2	leukocyte antigen CD37	0.586639	0.592395	-0.183008	0.901108	-0.769647	0.310006
TRINITY_DN10915_c0_g3	---NA---	-0.147024	0.779826	0.352949	0.408832	0.499973	0.0980596
TRINITY_DN10917_c0_g1	cAMP-specific 3',5'-cyclic phosphodiesterase 4C isoform X1	0.966463	0.439553	-1.29974	0.364359	-2.26621	0.028626
TRINITY_DN10917_c0_g1	cAMP-specific 3',5'-cyclic phosphodiesterase 4C isoform X2	0.966463	0.439553	-1.29974	0.364359	-2.26621	0.028626
TRINITY_DN109178_c0_g1	transcription factor A, mitochondrial	-0.262486	0.81645	-0.393237	0.743659	-0.130751	0.895008
TRINITY_DN10918_c0_g1	POU domain, class 2, transcription factor 1	0.0401991	0.95431	-0.868793	0.148944	-0.908992	0.0623672
TRINITY_DN10919_c0_g1	probable ATP-dependent RNA helicase DHX40 isoform X2	1.04577	0.170936	0.2815	0.774632	-0.764265	0.129459
TRINITY_DN1092_c0_g1	embigin	0.0791526	0.817802	-0.0720606	0.843399	-0.151213	0.493876
TRINITY_DN1092_c1_g1	structural maintenance of chromosomes flexible hinge domain-containing protein 1 isoform X2	-0.0107937	0.977042	0.141725	0.634813	0.152518	0.460568
TRINITY_DN1092_c1_g1	structural maintenance of chromosomes flexible hinge domain-containing protein 1	-0.0107937	0.977042	0.141725	0.634813	0.152518	0.460568
TRINITY_DN1092_c1_g2	Transposon Ty3-G Gag-Pol polyprotein	0.305327	0.739865	0.359002	0.691623	0.0536747	0.939948
TRINITY_DN1092_c4_g1	---NA---	0.244158	0.471238	-0.244126	0.48921	-0.488284	0.0452817
TRINITY_DN10920_c0_g1	---NA---	-0.00695592	0.98793	0.210444	0.54163	0.2174	0.37187
TRINITY_DN10921_c0_g1	---NA---	0.535438	0.377725	0.531568	0.354096	-0.00387007	0.994204
TRINITY_DN10922_c0_g1	myosin-1 isoform X3	0.410046	0.220401	-0.74292	0.0344289	-1.15297	0.000106551
TRINITY_DN10922_c0_g1	ATPase family AAA domain-containing protein 2-like	0.410046	0.220401	-0.74292	0.0344289	-1.15297	0.000106551
TRINITY_DN10922_c0_g2	ATPase family AAA domain-containing protein 2-like	0.406015	0.354385	0.301461	0.516157	-0.104553	0.773538
TRINITY_DN10923_c0_g1	---NA---	0.195517	0.62506	0.172947	0.674032	-0.0225693	0.945228
TRINITY_DN10923_c0_g2	branched-chain amino acid ABC transporter substrate-binding protein	0.16975	0.615245	0.438025	0.127881	0.268275	0.219166
TRINITY_DN10923_c1_g1	RNA-directed DNA polymerase from mobile element jockey-like	-0.145373	0.819086	0.10104	0.881721	0.246412	0.53853
TRINITY_DN10923_c1_g3	---NA---	-0.00963488	0.992033	-0.437297	0.596757	-0.427662	0.474225
TRINITY_DN10923_c2_g1	Extended synaptotagmin-3	0.2281	0.78013	0.222793	0.78688	-0.00530622	0.99414
TRINITY_DN10926_c0_g1	beta-1,3-galactosyl-O-glycosyl-glycoprotein beta-1,6-N-acetylglucosaminyltransferase 7	1.1476	0.197614	1.34165	0.112317	0.194053	0.778964
TRINITY_DN10928_c0_g1	---NA---	0.303158	0.354001	-0.270594	0.441227	-0.573753	0.0201681
TRINITY_DN10929_c0_g1	SH3 domain-containing kinase-binding protein 1	0.551569	0.208923	0.491457	0.270862	-0.0601126	0.877075
TRINITY_DN1093_c0_g1	bax inhibitor 1	0.0531499	0.888311	0.0419411	0.918532	-0.0112088	0.96815
TRINITY_DN1093_c0_g2	phosphatidylinositol-binding clathrin assembly protein isoform X2	-0.033408	0.882912	0.130862	0.481233	0.16427	0.209913
TRINITY_DN1093_c0_g2	phosphatidylinositol-binding clathrin assembly protein isoform X3	-0.033408	0.882912	0.130862	0.481233	0.16427	0.209913
TRINITY_DN1093_c0_g2	phosphatidylinositol-binding clathrin assembly protein isoform X7	-0.033408	0.882912	0.130862	0.481233	0.16427	0.209913
TRINITY_DN1093_c1_g1	---NA---	0.114996	0.869977	-0.480476	0.43947	-0.595472	0.178967
TRINITY_DN1093_c2_g1	---NA---	-0.0137055	0.968395	0.502064	0.0215127	0.515769	0.0027707
TRINITY_DN1093_c3_g1	pollen-specific leucine-rich repeat extensin-like protein 1	-0.486512	0.258379	-0.445423	0.322493	0.0410893	0.922658
TRINITY_DN1093_c4_g1	bromodomain-containing protein 4-like	-0.16669	0.78778	-0.342986	0.544757	-0.176296	0.693717
TRINITY_DN10931_c0_g1	---NA---	0.294893	0.562525	0.520453	0.242681	0.22556	0.495627
TRINITY_DN10933_c0_g1	leukocyte immunoglobulin-like receptor subfamily B member 3	0.0133854	0.993883	-2.20188	0.464595	-2.21526	0.374661
TRINITY_DN109360_c0_g1	Integrator complex subunit 10	0.74661	0.397678	-0.185269	0.880396	-0.931879	0.149407
TRINITY_DN10937_c0_g1	---NA---	1.22972	0.105837	0.845376	0.249277	-0.384348	0.366547
TRINITY_DN10937_c0_g2	dehydrogenase/reductase SDR family member 1	0.442238	0.169014	0.194237	0.598513	-0.248001	0.311969
TRINITY_DN10938_c1_g2	RNA-directed DNA polymerase from mobile element jockey-like	-0.00784493	0.989718	-0.114523	0.834659	-0.106678	0.774671
TRINITY_DN109393_c0_g2	---NA---	0.367404	0.0769133	0.442612	0.0304751	0.0752074	0.66002
TRINITY_DN1094_c0_g1	programmed cell death protein 4	0.0650791	0.794052	0.17305	0.416566	0.107971	0.500486
TRINITY_DN1094_c0_g1	---NA---	0.0650791	0.794052	0.17305	0.416566	0.107971	0.500486
TRINITY_DN1094_c1_g1	protein phosphatase methylesterase 1	0.0746598	0.733912	0.170571	0.373193	0.0959109	0.50802
TRINITY_DN1094_c1_g1	Protein phosphatase methylesterase 1	0.0746598	0.733912	0.170571	0.373193	0.0959109	0.50802
TRINITY_DN10940_c0_g1	---NA---	-0.0746617	0.956073	1.02372	0.23538	1.09839	0.0728677
TRINITY_DN10941_c0_g1	TBC1 domain family member 1	-0.0669457	0.951524	-0.639617	0.482428	-0.572671	0.407587
TRINITY_DN10942_c0_g2	---NA---	0.0469389	0.91254	0.108891	0.780657	0.0619519	0.824266
TRINITY_DN10942_c0_g2	40S ribosomal protein S20	0.0469389	0.91254	0.108891	0.780657	0.0619519	0.824266
TRINITY_DN10944_c0_g1	Transcription elongation factor B polypeptide 1	0.501748	0.63337	-0.172212	0.899572	-0.673959	0.361831
TRINITY_DN10944_c0_g2	UPF0594 protein C13orf38 like protein	-0.744442	0.423989	0.369312	0.666385	1.11375	0.0662448
TRINITY_DN10947_c0_g1	uncharacterized protein LOC114020138 isoform X1	-0.966162	0.0674904	-1.35936	0.0165157	-0.393196	0.426216
TRINITY_DN10947_c1_g2	Krueppel-like factor 6	-0.203778	0.44348	-0.0354407	0.921068	0.168337	0.397843
TRINITY_DN10947_c1_g3	Krueppel-like factor 7 isoform X1	-0.11219	0.854161	0.101297	0.875418	0.213487	0.574423
TRINITY_DN10947_c2_g1	---NA---	0.156503	0.670663	0.507867	0.0965453	0.351364	0.127579
TRINITY_DN109476_c0_g1	septin-2 isoform X2	0.0492916	0.944567	0.418522	0.386826	0.36923	0.271647
TRINITY_DN10948_c0_g1	pumilio -like protein	-0.606102	0.457326	-1.6754	0.0757933	-1.0693	0.180387
TRINITY_DN10948_c0_g2	zinc finger protein 154-like	0.31527	0.459467	0.374932	0.366439	0.0596622	0.866537
TRINITY_DN10948_c0_g3	diacylglycerol kinase iota	-0.00443896	0.993101	-0.0965707	0.844616	-0.0921318	0.778046
TRINITY_DN10948_c0_g4	zinc finger protein 184-like isoform X4	-0.362431	0.55164	0.116981	0.868334	0.479411	0.217131
TRINITY_DN109480_c0_g1	Androgen receptor	0.281122	0.671974	0.252552	0.701873	-0.0285695	0.95245
TRINITY_DN10949_c0_g1	Centrin-2	-0.0750675	0.894808	0.742021	0.0456939	0.817089	0.00331185
TRINITY_DN109495_c0_g1	Putative phospholipid-transporting ATPase VB	0.0960743	0.766414	0.142561	0.638797	0.0464872	0.843796
TRINITY_DN109495_c0_g1	ORF2	0.0960743	0.766414	0.142561	0.638797	0.0464872	0.843796
TRINITY_DN1095_c0_g1	small G protein signaling modulator 3	-0.0383092	0.889326	-0.342454	0.100239	-0.304145	0.0590694
TRINITY_DN10951_c0_g1	---NA---	-0.309962	0.42424	-0.216522	0.60643	0.0934406	0.778721
TRINITY_DN10951_c0_g2	---NA---	-0.185998	0.709452	0.0295877	0.962002	0.215585	0.525262
TRINITY_DN109519_c0_g1	delta(14)-sterol reductase	-0.348214	0.491889	-0.0316478	0.963641	0.316566	0.394413
TRINITY_DN10952_c0_g1	ribonuclease P protein subunit p20	0.0901638	0.902683	-0.106119	0.891232	-0.196282	0.675715
TRINITY_DN109539_c3_g1	---NA---	1.09508	0.551554	1.66997	0.261699	0.574882	0.476345
TRINITY_DN10956_c0_g2	tigger transposable element-derived protein 1-like	-0.379877	0.593286	0.0852981	0.92176	0.465175	0.3409
TRINITY_DN109566_c0_g1	protein furry homolog-like isoform X2	-0.162832	0.681058	0.515944	0.111623	0.678776	0.00681342
TRINITY_DN109568_c0_g1	---NA---	1.06248	0.746233	1.53434	0.564379	0.471858	0.74717
TRINITY_DN10957_c0_g1	rho GTPase-activating protein 33	0.43638	0.423375	-1.13557	0.0528687	-1.57195	0.00129529
TRINITY_DN10957_c0_g2	Rho GTPase-activating protein 33	0.683369	0.255999	-1.75298	0.0675747	-2.43635	0.00350223
TRINITY_DN10957_c0_g2	---NA---	0.683369	0.255999	-1.75298	0.0675747	-2.43635	0.00350223
TRINITY_DN10958_c0_g1	Apoptosis-associated speck-like protein containing a CARD	-0.320459	0.857856	0.461255	0.753617	0.781714	0.423935
TRINITY_DN10958_c0_g1	NACHT, LRR and PYD domains-containing protein 3-like	-0.320459	0.857856	0.461255	0.753617	0.781714	0.423935
TRINITY_DN10958_c0_g1	---NA---	-0.320459	0.857856	0.461255	0.753617	0.781714	0.423935
TRINITY_DN10958_c0_g1	apoptosis-associated speck-like protein containing a CARD	-0.320459	0.857856	0.461255	0.753617	0.781714	0.423935
TRINITY_DN109583_c0_g1	exosome complex component RRP40	-0.0597437	0.934499	0.0316697	0.966722	0.0914135	0.840958
TRINITY_DN1096_c0_g1	nicotinate phosphoribosyltransferase	-0.428783	0.167241	-0.829579	0.00988514	-0.400795	0.117921
TRINITY_DN1096_c0_g1	Nicotinate phosphoribosyltransferase	-0.428783	0.167241	-0.829579	0.00988514	-0.400795	0.117921
TRINITY_DN1096_c2_g1	---NA---	0.861888	0.179341	-0.183904	0.837722	-1.04579	0.0290764
TRINITY_DN10960_c0_g1	---NA---	-0.777604	0.282667	-0.95947	0.20094	-0.181865	0.796405
TRINITY_DN109605_c0_g1	Y+L amino acid transporter 2	0.279234	0.59873	0.0402083	0.953481	-0.239026	0.51592
TRINITY_DN109606_c0_g2	protein asteroid homolog 1	0.626383	0.103044	0.574359	0.131548	-0.0520247	0.877623
TRINITY_DN10961_c0_g1	WD repeat-containing protein 46	0.273613	0.426363	-0.331	0.352285	-0.604613	0.0189028
TRINITY_DN10962_c0_g1	RNA-directed DNA polymerase from mobile element jockey-like	-0.40193	0.0431452	-0.0178118	0.9519	0.384118	0.0141146
TRINITY_DN10962_c0_g1	NADH dehydrogenase [ubiquinone] 1 beta subcomplex subunit 4	-0.40193	0.0431452	-0.0178118	0.9519	0.384118	0.0141146
TRINITY_DN10962_c0_g3	---NA---	1.03858	0.203917	0.123984	0.91697	-0.914596	0.113339
TRINITY_DN109624_c0_g1	E3 ubiquitin-protein ligase TRIM41	0.206661	0.593392	-0.20988	0.60122	-0.416541	0.116353
TRINITY_DN109625_c0_g1	forkhead box protein S1	1.29724	0.249529	-0.159204	0.926641	-1.45644	0.0606843
TRINITY_DN10963_c0_g1	lysosomal alpha-glucosidase-like	0.145775	0.777461	0.133929	0.8007	-0.0118455	0.97719
TRINITY_DN10963_c0_g1	---NA---	0.145775	0.777461	0.133929	0.8007	-0.0118455	0.97719
TRINITY_DN109636_c0_g1	protein FAM124A	0.568773	0.489748	1.49909	0.0277226	0.930319	0.0446857
TRINITY_DN10964_c0_g2	E3 ubiquitin-protein ligase TRIM11-like	0.0860134	0.795894	0.0347744	0.927555	-0.051239	0.829625
TRINITY_DN109640_c0_g1	kinesin-associated protein 3	0.153812	0.758062	0.116125	0.828694	-0.0376875	0.921589
TRINITY_DN10969_c0_g1	Zinc finger and SCAN domain-containing protein 29	0.28674	0.653496	-0.55702	0.437287	-0.84376	0.100316
TRINITY_DN1097_c0_g1	ubiquitin-like modifier-activating enzyme 6	0.0924808	0.676385	-0.00535171	0.985894	-0.0978325	0.531048
TRINITY_DN1097_c0_g1	Ubiquitin-like modifier-activating enzyme 6	0.0924808	0.676385	-0.00535171	0.985894	-0.0978325	0.531048
TRINITY_DN10970_c0_g1	serine/threonine-protein kinase Nek2	0.0999548	0.870291	0.195744	0.730102	0.0957896	0.816672
TRINITY_DN109708_c0_g1	small integral membrane protein 11A	-0.269211	0.199716	0.232402	0.26669	0.501613	0.00179315
TRINITY_DN109708_c0_g2	---NA---	0.375135	0.621488	-1.64661	0.041842	-2.02174	0.00289972
TRINITY_DN10971_c0_g1	vitelline membrane outer layer protein 1 homolog	0.602658	0.645433	0.43386	0.754984	-0.168798	0.857114
TRINITY_DN109721_c0_g1	probable dimethyladenosine transferase	0.180334	0.863577	-0.538748	0.648637	-0.719082	0.39075
TRINITY_DN109723_c0_g1	---NA---	-0.128196	0.81645	-0.67551	0.134842	-0.547314	0.119526
TRINITY_DN10973_c2_g1	zinc finger protein 696-like	0.183273	0.768157	-0.747432	0.167786	-0.930705	0.0248619
TRINITY_DN10973_c3_g1	24-hydroxycholesterol 7-alpha-hydroxylase	0.6267	0.533082	-0.350719	0.812697	-0.977419	0.274646
TRINITY_DN10974_c0_g1	Butyrophilin-like protein 2	-0.419705	0.090678	-0.806664	0.00229301	-0.386959	0.0601309
TRINITY_DN10974_c1_g1	hypothetical protein UY3_03485	0.665355	0.217461	0.535969	0.322792	-0.129385	0.756479
TRINITY_DN10975_c0_g2	immunoglobulin superfamily member 3 isoform X2	0.494316	0.337882	-0.107557	0.881107	-0.601873	0.117084
TRINITY_DN109755_c0_g1	---NA---	0.242847	0.856282	0.625996	0.557788	0.383149	0.600872
TRINITY_DN109764_c0_g1	cytoplasmic dynein 1 intermediate chain 2 isoform X1	1.02362	0.23315	1.15119	0.137279	0.127573	0.815397
TRINITY_DN109764_c2_g1	---NA---	0.679625	0.217609	0.189499	0.788593	-0.490126	0.201301
TRINITY_DN10977_c0_g3	proliferation-associated protein 2G4	0.131716	0.830287	-1.00106	0.0830688	-1.13277	0.0164194
TRINITY_DN10978_c0_g1	STE20-like serine/threonine-protein kinase isoform X1	-0.159854	0.48208	0.172014	0.446555	0.331869	0.0367981
TRINITY_DN10978_c0_g1	STE20-like serine/threonine-protein kinase isoform X2	-0.159854	0.48208	0.172014	0.446555	0.331869	0.0367981
TRINITY_DN10978_c0_g2	---NA---	-0.235299	0.713002	-0.00541076	0.995223	0.229889	0.608518
TRINITY_DN10978_c0_g4	STE20-like serine/threonine-protein kinase isoform X1	-0.216088	0.739865	-0.915174	0.19522	-0.699086	0.238623
TRINITY_DN1098_c0_g1	palmitoyltransferase ZDHHC6	0.0375291	0.880631	0.219069	0.255003	0.18154	0.204999
TRINITY_DN1098_c0_g1	Palmitoyltransferase ZDHHC6	0.0375291	0.880631	0.219069	0.255003	0.18154	0.204999
TRINITY_DN1098_c1_g1	Coiled-coil domain-containing protein 82	0.000264567	0.99918	0.202531	0.280244	0.202266	0.142063
TRINITY_DN1098_c1_g2	SH2 domain-containing protein 4B	0.307648	0.556479	0.454935	0.328759	0.147287	0.671552
TRINITY_DN10980_c4_g1	hypothetical protein UY3_05796, partial	0.103208	0.79299	-0.149877	0.697666	-0.253085	0.313822
TRINITY_DN109808_c0_g1	---NA---	0.043595	0.943709	0.65621	0.0865052	0.612614	0.0253982
TRINITY_DN109810_c0_g2	---NA---	0.147666	0.876743	0.966082	0.135604	0.818415	0.0661848
TRINITY_DN10983_c0_g1	---NA---	0.183325	0.766092	0.282413	0.616848	0.0990882	0.819358
TRINITY_DN10986_c1_g1	transient receptor potential cation channel subfamily M member 5	0.373471	0.678186	0.0770215	0.945512	-0.29645	0.613153
TRINITY_DN10987_c0_g1	platelet glycoprotein V	-0.307824	0.858563	0.19815	0.907318	0.505974	0.611063
TRINITY_DN109870_c0_g1	WAS/WASL-interacting protein family member 1	1.64695	0.457061	0.870316	0.723007	-0.776639	0.516804
TRINITY_DN10988_c0_g1	inosine-5'-monophosphate dehydrogenase 2 isoform X2	-0.0342875	0.94088	-0.145203	0.710259	-0.110915	0.690067
TRINITY_DN10989_c0_g2	RNA-directed DNA polymerase from mobile element jockey-like	0.433947	0.716293	-0.0736358	0.962373	-0.507583	0.534863
TRINITY_DN10989_c3_g1	Peptidyl-prolyl cis-trans isomerase FKBP9	-0.392655	0.465842	-0.683947	0.20827	-0.291292	0.534362
TRINITY_DN1099_c0_g1	zinc finger protein 551-like	0.300951	0.212253	0.471939	0.0404061	0.170988	0.336484
TRINITY_DN1099_c0_g1	zinc finger protein 501-like	0.300951	0.212253	0.471939	0.0404061	0.170988	0.336484
TRINITY_DN10991_c0_g1	---NA---	0.463578	0.530988	-0.0860911	0.931304	-0.549669	0.296157
TRINITY_DN109911_c1_g2	2,4-dienoyl-CoA reductase, mitochondrial	-0.127017	0.799506	0.330534	0.427539	0.457552	0.11682
TRINITY_DN109924_c0_g1	Eukaryotic translation initiation factor 4H	0.516485	0.244741	0.982827	0.0126059	0.466342	0.0682106
TRINITY_DN10995_c0_g1	protein-L-isoaspartate O-methyltransferase domain-containing protein 2	0.315247	0.655786	0.2156	0.773121	-0.0996469	0.847075
TRINITY_DN10995_c1_g1	---NA---	-0.141235	0.816497	0.233142	0.663357	0.374376	0.284749
TRINITY_DN10995_c3_g1	glutathione S-transferase C-terminal domain-containing protein	-0.523682	0.11745	-0.172043	0.663357	0.351638	0.183468
TRINITY_DN10996_c0_g1	---NA---	-0.123663	0.804124	-0.334416	0.445434	-0.210753	0.529499
TRINITY_DN10996_c0_g3	---NA---	0.163393	0.788108	0.292673	0.587528	0.12928	0.744083
TRINITY_DN109969_c0_g1	---NA---	-0.406682	0.468321	0.167128	0.792155	0.57381	0.136445
TRINITY_DN10997_c0_g1	---NA---	-0.350055	0.526171	-0.379595	0.494104	-0.0295394	0.953416
TRINITY_DN10997_c0_g2	---NA---	-0.300125	0.646428	-0.390809	0.541317	-0.0906837	0.869271
TRINITY_DN10997_c1_g1	DEP domain-containing protein 4	-0.490497	0.245241	-0.694788	0.104633	-0.204291	0.581705
TRINITY_DN11_c0_g1	interferon regulatory factor 2-binding protein 2	-0.237868	0.52674	-0.191865	0.628193	0.0460028	0.887091
TRINITY_DN11_c0_g2	interferon regulatory factor 2-binding protein 1	-0.0216749	0.969569	-0.362566	0.375599	-0.340891	0.258087
TRINITY_DN110_c0_g1	Calcium/calmodulin-dependent 3',5'-cyclic nucleotide phosphodiesterase 1A	0.0354476	0.913809	0.213735	0.388316	0.178287	0.324176
TRINITY_DN110_c0_g2	serine/arginine-rich splicing factor 4	-0.0743286	0.719543	-0.311443	0.0748127	-0.237114	0.080734
TRINITY_DN110_c0_g2	serine/arginine-rich splicing factor 4 isoform X2	-0.0743286	0.719543	-0.311443	0.0748127	-0.237114	0.080734
TRINITY_DN110_c1_g1	---NA---	-0.140908	0.662283	0.0893908	0.79986	0.230299	0.282214
TRINITY_DN1100_c0_g1	hypothetical protein UY3_17240	0.243061	0.707741	-0.382011	0.550895	-0.625072	0.151878
TRINITY_DN1100_c0_g2	Ras-related protein Rab-4B	0.269612	0.103956	-0.0523518	0.81289	-0.321964	0.0133829
TRINITY_DN1100_c0_g2	digestive organ expansion factor homolog	0.269612	0.103956	-0.0523518	0.81289	-0.321964	0.0133829
TRINITY_DN1100_c0_g3	peptidyl-prolyl cis-trans isomerase FKBP8	-0.207237	0.530062	-0.686656	0.0255728	-0.479419	0.0488282
TRINITY_DN1100_c0_g4	---NA---	0.315093	0.391133	0.258231	0.493896	-0.0568621	0.851044
TRINITY_DN1100_c1_g1	---NA---	0.259263	0.768137	-0.909361	0.315906	-1.16862	0.0806899
TRINITY_DN11000_c0_g1	adaptin ear-binding coat-associated protein 1	0.888992	0.157089	0.43393	0.527261	-0.455062	0.291652
TRINITY_DN11000_c0_g2	mitochondrial fission process protein 1	0.416013	0.730027	-0.122226	0.936965	-0.538239	0.526831
TRINITY_DN110006_c0_g2	---NA---	0.58962	0.376767	1.18983	0.0310495	0.600206	0.0750245
TRINITY_DN11002_c0_g1	Maltase-glucoamylase, intestinal	0.0441019	0.94286	-0.423108	0.383862	-0.46721	0.185371
TRINITY_DN110028_c0_g1	RNA-binding protein 25-like	-0.368492	0.432389	-0.365483	0.449061	0.00300892	0.995659
TRINITY_DN11003_c0_g1	ubiquitin-like domain-containing CTD phosphatase 1	0.449586	0.283868	0.790139	0.0420073	0.340552	0.241015
TRINITY_DN110035_c0_g1	hypothetical protein M959_10594, partial	-0.387314	0.59914	-0.256251	0.746208	0.131063	0.828646
TRINITY_DN11004_c0_g1	---NA---	0.0758546	0.758989	0.143352	0.520961	0.0674976	0.695259
TRINITY_DN110046_c0_g1	ataxin-7 isoform X1	-0.35686	0.363273	-0.516336	0.188235	-0.159476	0.634825
TRINITY_DN11006_c0_g1	---NA---	0.574311	0.418789	-0.18212	0.84554	-0.756431	0.14494
TRINITY_DN110083_c0_g1	---NA---	0.915719	0.245504	-2.09238	0.180487	-3.0081	0.022684
TRINITY_DN110092_c0_g1	plastin-2	0.633974	0.314171	0.73425	0.206255	0.100276	0.819843
TRINITY_DN110093_c0_g1	---NA---	-0.203544	0.849019	-1.28745	0.295481	-1.0839	0.285709
TRINITY_DN1101_c0_g1	E3 ubiquitin-protein ligase ZFP91	0.029537	0.925953	-0.174248	0.483766	-0.203785	0.250309
TRINITY_DN1101_c0_g2	Sideroflexin-5	-0.257433	0.553475	0.100017	0.843599	0.35745	0.228974
TRINITY_DN1101_c0_g2	hypothetical protein N308_14515, partial	-0.257433	0.553475	0.100017	0.843599	0.35745	0.228974
TRINITY_DN1101_c0_g3	E3 ubiquitin-protein ligase Hakai isoform X3	0.0304863	0.928392	-0.182151	0.494985	-0.212638	0.260752
TRINITY_DN1101_c1_g1	protein phosphatase PTC7 homolog	-0.096884	0.607905	0.134328	0.448735	0.231212	0.0630876
TRINITY_DN1101_c1_g1	Protein phosphatase PTC7	-0.096884	0.607905	0.134328	0.448735	0.231212	0.0630876
TRINITY_DN1101_c1_g2	---NA---	0.894627	0.314665	0.626466	0.473971	-0.268161	0.598594
TRINITY_DN11010_c2_g1	UPF0594 protein C13orf38 like protein	0.501489	0.461877	0.214936	0.792505	-0.286553	0.56643
TRINITY_DN110115_c0_g1	ankyrin repeat domain-containing protein 49	0.0122027	0.971266	0.0275139	0.931922	0.0153113	0.942419
TRINITY_DN11013_c0_g2	---NA---	0.969218	0.223464	0.713728	0.369538	-0.25549	0.618146
TRINITY_DN11014_c0_g1	unconventional myosin-XIX	-0.139228	0.826482	-0.0942743	0.893723	0.0449534	0.925351
TRINITY_DN11015_c0_g1	symplekin	0.225563	0.565344	-0.642136	0.0784116	-0.867699	0.00303311
TRINITY_DN11015_c0_g1	symplekin isoform X1	0.225563	0.565344	-0.642136	0.0784116	-0.867699	0.00303311
TRINITY_DN110158_c0_g1	---NA---	-0.622273	0.221199	-1.28486	0.0214893	-0.662589	0.154508
TRINITY_DN11016_c0_g1	developmentally-regulated GTP-binding protein 1	-0.291719	0.262896	-0.153594	0.602581	0.138125	0.514511
TRINITY_DN11016_c0_g2	---NA---	-0.455361	0.510691	0.026844	0.9766	0.482205	0.313669
TRINITY_DN11018_c0_g1	Leucine-rich repeat-containing protein 49	0.278505	0.847306	0.180997	0.908463	-0.097508	0.921714
TRINITY_DN110195_c0_g2	---NA---	-0.377358	0.376086	-1.04335	0.0328404	-0.665996	0.104611
TRINITY_DN110195_c3_g1	zinc finger protein 22-like	0.288804	0.660684	0.384689	0.531151	0.0958852	0.842202
TRINITY_DN1102_c0_g1	exportin-5 isoform X1	-0.0513779	0.885778	-0.362574	0.193006	-0.311196	0.142634
TRINITY_DN1102_c0_g2	---NA---	0.000893166	0.998147	-0.246201	0.400703	-0.247094	0.247421
TRINITY_DN1102_c0_g2	exportin-5 isoform X4	0.000893166	0.998147	-0.246201	0.400703	-0.247094	0.247421
TRINITY_DN1102_c0_g3	profilin-2	-0.0113965	0.993803	-1.23847	0.417525	-1.22708	0.308283
TRINITY_DN11020_c0_g1	protein S100-P	0.0664927	0.833124	-0.306821	0.236877	-0.373314	0.0531315
TRINITY_DN11020_c1_g1	paladin isoform X2	0.0685671	0.873416	0.110463	0.78987	0.0418957	0.889314
TRINITY_DN11022_c0_g1	hypothetical protein UY3_02841	1.26934	0.051631	-0.186762	0.846058	-1.45611	0.00664144
TRINITY_DN11024_c0_g1	Protein FAM92A1	-0.150956	0.84938	-0.586321	0.406366	-0.435365	0.428826
TRINITY_DN11024_c0_g2	peroxiredoxin-4	-0.0893631	0.939895	-0.616715	0.552735	-0.527352	0.502712
TRINITY_DN11024_c1_g1	acyl-coenzyme A synthetase ACSM3, mitochondrial isoform X1	-0.830556	0.197188	-0.670271	0.318139	0.160285	0.795844
TRINITY_DN11024_c1_g1	acyl-coenzyme A synthetase ACSM3, mitochondrial-like isoform X1	-0.830556	0.197188	-0.670271	0.318139	0.160285	0.795844
TRINITY_DN11025_c0_g1	---NA---	0.492843	0.544508	0.0622773	0.954911	-0.430565	0.459467
TRINITY_DN11025_c1_g1	---NA---	-0.00599295	0.991425	-0.0167103	0.977923	-0.0107174	0.97878
TRINITY_DN11026_c0_g1	lipopolysaccharide-responsive and beige-like anchor protein	-0.163128	0.470012	0.529786	0.00823828	0.692914	4.314e-05
TRINITY_DN11026_c0_g3	Hepatocyte growth factor activator	0.131528	0.78812	-0.651162	0.112434	-0.78269	0.0147194
TRINITY_DN11027_c0_g1	RNA-directed DNA polymerase from mobile element jockey-like	0.158538	0.810301	1.63106	0.000712801	1.47253	6.21624e-05
TRINITY_DN11027_c0_g3	hypothetical protein UY3_16080	-0.272531	0.69374	-1.47613	0.0278787	-1.2036	0.0286211
TRINITY_DN11028_c1_g1	---NA---	0.42536	0.462378	0.156104	0.823926	-0.269255	0.500788
TRINITY_DN11029_c0_g1	26S proteasome non-ATPase regulatory subunit 6	-0.0555577	0.855968	-0.0303515	0.929235	0.0252062	0.910238
TRINITY_DN11029_c0_g2	26S proteasome non-ATPase regulatory subunit 6 isoform X2	0.167328	0.765717	0.459923	0.31094	0.292595	0.371903
TRINITY_DN1103_c0_g1	mRNA-decapping enzyme 1B isoform X1	-0.235847	0.215218	-0.0120959	0.965928	0.223751	0.12022
TRINITY_DN1103_c1_g1	protein phosphatase 1 regulatory subunit 12B isoform X1	-0.00288117	0.990718	0.2179	0.194482	0.220782	0.0788362
TRINITY_DN1103_c2_g1	Ankyrin repeat and FYVE domain-containing protein 1	-0.328643	0.449059	-1.0014	0.0201359	-0.672753	0.0523634
TRINITY_DN11031_c0_g1	---NA---	1.10795	0.0594688	-0.0729655	0.936588	-1.18092	0.00634742
TRINITY_DN11032_c0_g1	E3 ubiquitin-protein ligase UHRF2	-0.0426951	0.958037	-0.0236925	0.977198	0.0190025	0.97183
TRINITY_DN11032_c1_g1	inositol hexakisphosphate kinase 3 isoform X1	-0.504406	0.335874	-0.139858	0.821504	0.364548	0.356439
TRINITY_DN11032_c6_g1	hypothetical protein DV515_00003912	0.38156	0.596879	0.841098	0.154969	0.459538	0.262711
TRINITY_DN11033_c0_g1	exosome component 10	-0.0169224	0.980297	0.189414	0.729287	0.206337	0.568127
TRINITY_DN11033_c0_g1	---NA---	-0.0169224	0.980297	0.189414	0.729287	0.206337	0.568127
TRINITY_DN11038_c0_g1	solute carrier family 41 member 1	0.411625	0.64575	0.101794	0.924912	-0.309831	0.555302
TRINITY_DN110387_c0_g1	ras-related protein Rab-12	0.312631	0.550579	0.240513	0.661527	-0.0721187	0.865002
TRINITY_DN11039_c1_g1	radial spoke head protein 3 homolog	0.259181	0.547443	0.0714136	0.89685	-0.187768	0.552151
TRINITY_DN1104_c0_g1	coiled-coil domain-containing protein 62 isoform X1	-0.172445	0.427401	0.115756	0.6194	0.288202	0.061429
TRINITY_DN11040_c0_g2	glutamate--cysteine ligase catalytic subunit	0.569336	0.477783	0.911005	0.190611	0.341669	0.480667
TRINITY_DN11041_c1_g1	---NA---	0.407269	0.718377	-0.0546318	0.970306	-0.461901	0.535595
TRINITY_DN11041_c2_g1	---NA---	0.104884	0.917413	0.220937	0.806812	0.116053	0.853758
TRINITY_DN11042_c0_g1	actin-related protein 3B	0.382877	0.570132	-0.488303	0.47826	-0.87118	0.0684946
TRINITY_DN11042_c0_g1	nuclear receptor ROR-gamma	0.382877	0.570132	-0.488303	0.47826	-0.87118	0.0684946
TRINITY_DN11044_c0_g1	---NA---	0.190491	0.734628	-0.536187	0.29207	-0.726678	0.0515591
TRINITY_DN11044_c1_g1	NEDD8 ultimate buster 1	-0.0896051	0.94249	-0.0901482	0.942348	-0.000543075	0.99983
TRINITY_DN11045_c0_g2	terminal nucleotidyltransferase 4A isoform X4	-0.262423	0.135561	-0.241929	0.179336	0.0204939	0.904461
TRINITY_DN11045_c0_g2	histone deacetylase 4 isoform X1	-0.262423	0.135561	-0.241929	0.179336	0.0204939	0.904461
TRINITY_DN11048_c0_g2	Werner syndrome ATP-dependent helicase	-0.41629	0.33305	-0.101958	0.855387	0.314332	0.341907
TRINITY_DN11048_c0_g3	---NA---	0.0186316	0.971587	-0.123905	0.779677	-0.142536	0.626594
TRINITY_DN11048_c1_g1	Cystathionine beta-synthase	0.162781	0.755313	0.39875	0.368633	0.23597	0.477029
TRINITY_DN11048_c2_g1	putative RNA-binding protein 15	-0.310592	0.115167	0.0473113	0.860352	0.357903	0.0180651
TRINITY_DN110485_c0_g1	hypothetical protein UY3_11226	0.250034	0.81645	0.323126	0.755846	0.073092	0.9249
TRINITY_DN11049_c0_g1	UPF0594 protein C13orf38 like protein	0.629167	0.13321	0.12828	0.817845	-0.500887	0.110903
TRINITY_DN1105_c0_g1	---NA---	0.860123	0.357094	-1.95565	0.0863305	-2.81577	0.00299625
TRINITY_DN110511_c0_g1	Glutamate--cysteine ligase catalytic subunit	1.00956	0.123651	1.00803	0.0951875	-0.00152834	0.998076
TRINITY_DN110521_c0_g1	Calpain-7-like protein	-0.226172	0.707724	-0.0107324	0.989091	0.21544	0.608777
TRINITY_DN11053_c0_g1	WD repeat and HMG-box DNA-binding protein 1	-0.349253	0.350618	-0.199818	0.632311	0.149435	0.627424
TRINITY_DN11056_c1_g1	Serine/threonine-protein kinase SIK3	0.511903	0.244728	-0.617805	0.204173	-1.12971	0.0028635
TRINITY_DN11057_c0_g1	60S ribosome subunit biogenesis protein NIP7 homolog	-0.264334	0.39114	-0.120396	0.737552	0.143938	0.552151
TRINITY_DN11058_c0_g1	AChain A, Tyrosine-protein kinase JAK2	-0.223585	0.715195	1.42294	0.00247017	1.64652	2.03599e-05
TRINITY_DN1106_c0_g1	serine/arginine-rich splicing factor 7	-0.213348	0.135267	-0.538979	0.000425224	-0.32563	0.00510145
TRINITY_DN1106_c1_g1	dual specificity protein phosphatase CDC14B isoform X3	-0.10836	0.722956	0.125693	0.674216	0.234053	0.23024
TRINITY_DN1106_c2_g1	proteasome adapter and scaffold protein ECM29 isoform X1	-0.0822621	0.632736	-0.114295	0.48904	-0.032033	0.815402
TRINITY_DN1106_c3_g1	carnosine N-methyltransferase isoform X1	-0.224876	0.105089	-0.0362721	0.847461	0.188604	0.0785316
TRINITY_DN1106_c3_g1	carnosine N-methyltransferase isoform X2	-0.224876	0.105089	-0.0362721	0.847461	0.188604	0.0785316
TRINITY_DN1106_c3_g2	cytochrome c oxidase assembly factor 5	0.0400197	0.929277	0.193235	0.59066	0.153215	0.550172
TRINITY_DN1106_c3_g3	---NA---	0.0171511	0.980687	0.271608	0.600572	0.254457	0.473458
TRINITY_DN1106_c4_g1	serine/arginine-rich splicing factor 1 isoform X2	-0.0867319	0.578589	-0.345769	0.0132824	-0.259038	0.0177083
TRINITY_DN1106_c4_g1	serine/arginine-rich splicing factor 1	-0.0867319	0.578589	-0.345769	0.0132824	-0.259038	0.0177083
TRINITY_DN1106_c5_g1	zinc finger protein 839 isoform X1	-0.158853	0.627881	-0.102758	0.775822	0.0560952	0.829815
TRINITY_DN11060_c0_g1	PHD finger protein 23	-0.37721	0.294284	-0.278067	0.471423	0.0991426	0.754597
TRINITY_DN11061_c0_g1	RNA-directed DNA polymerase from mobile element jockey-like	0.144225	0.909787	0.0519211	0.969169	-0.0923039	0.909768
TRINITY_DN11061_c0_g1	craniofacial development protein 2-like	0.144225	0.909787	0.0519211	0.969169	-0.0923039	0.909768
TRINITY_DN11062_c0_g1	Nuclear autoantigenic sperm protein	-0.054928	0.939083	0.183975	0.762387	0.238903	0.546884
TRINITY_DN11065_c0_g1	E3 ubiquitin-protein ligase SHPRH-like	-0.175333	0.243336	0.248929	0.0842739	0.424263	0.000330037
TRINITY_DN11065_c0_g1	E3 ubiquitin-protein ligase SHPRH	-0.175333	0.243336	0.248929	0.0842739	0.424263	0.000330037
TRINITY_DN110657_c0_g1	ubiquitin domain-containing protein 1	0.216652	0.643463	0.00848815	0.989598	-0.208164	0.525928
TRINITY_DN110657_c0_g1	MMS19 nucleotide excision repair protein like protein	0.216652	0.643463	0.00848815	0.989598	-0.208164	0.525928
TRINITY_DN110657_c0_g2	G protein-coupled receptor kinase 5-like isoform X1	0.414365	0.392159	0.151464	0.799488	-0.262901	0.47387
TRINITY_DN11067_c0_g1	DNA replication ATP-dependent helicase/nuclease DNA2 isoform X3	-0.264617	0.470012	-0.0723877	0.878818	0.192229	0.486883
TRINITY_DN11067_c0_g2	calcium/calmodulin-dependent protein kinase kinase 2 isoform X1	0.23501	0.457957	-0.165058	0.638346	-0.400069	0.0799353
TRINITY_DN11067_c0_g2	Calcium/calmodulin-dependent protein kinase kinase 2	0.23501	0.457957	-0.165058	0.638346	-0.400069	0.0799353
TRINITY_DN11067_c1_g1	---NA---	0.299692	0.782663	0.227618	0.837761	-0.0720738	0.921589
TRINITY_DN11068_c0_g1	cysteine--tRNA ligase, cytoplasmic isoform X2	-0.0310216	0.957316	0.17696	0.706737	0.207981	0.507823
TRINITY_DN1107_c0_g1	centrosomal protein of 78 kDa isoform X1	-0.365577	0.176916	0.0299084	0.938423	0.395485	0.0527973
TRINITY_DN1107_c0_g2	Putative ubiquitin carboxyl-terminal hydrolase FAF-X	0.161486	0.63835	0.371775	0.210983	0.210289	0.351092
TRINITY_DN1107_c1_g1	BRD4-interacting chromatin-remodeling complex-associated protein	0.0637455	0.809984	0.154073	0.500761	0.0903275	0.600618
TRINITY_DN1107_c1_g1	glioma tumor suppressor candidate region gene 1 protein isoform X1	0.0637455	0.809984	0.154073	0.500761	0.0903275	0.600618
TRINITY_DN11070_c0_g1	septin-2 isoform X2	0.170415	0.601477	0.176321	0.587332	0.0059061	0.983947
TRINITY_DN11071_c0_g1	hypothetical protein llap_6247	0.246348	0.827286	0.21891	0.847751	-0.0274382	0.970899
TRINITY_DN11072_c0_g1	---NA---	-0.167692	0.79953	0.298556	0.611272	0.466249	0.238882
TRINITY_DN11072_c1_g3	DnaJ subfamily B member 4	0.240131	0.547793	0.393883	0.278211	0.153751	0.588608
TRINITY_DN11072_c1_g3	dnaJ homolog subfamily B member 4 isoform X1	0.240131	0.547793	0.393883	0.278211	0.153751	0.588608
TRINITY_DN11073_c0_g1	26S proteasome regulatory subunit 6A	-0.388709	0.114316	-0.11917	0.689434	0.269539	0.162963
TRINITY_DN11073_c0_g1	26S protease regulatory subunit 6A	-0.388709	0.114316	-0.11917	0.689434	0.269539	0.162963
TRINITY_DN11073_c0_g2	hypothetical protein N309_14920, partial	0.017782	0.973019	0.430971	0.205047	0.413189	0.0985799
TRINITY_DN11073_c2_g1	proteasome subunit beta type-4	-0.529605	0.277545	-0.514405	0.296549	0.0151997	0.976384
TRINITY_DN11076_c0_g1	Ran GTPase-activating protein 1	0.219129	0.683548	0.241179	0.651058	0.0220499	0.959686
TRINITY_DN110771_c0_g1	---NA---	0.0933457	0.839824	-0.104883	0.82579	-0.198228	0.500689
TRINITY_DN11078_c0_g2	---NA---	-0.534187	0.511538	0.36022	0.618068	0.894408	0.0754228
TRINITY_DN1108_c0_g1	ras-related protein Rab-6A isoform X2	-0.217608	0.169057	0.113719	0.512628	0.331327	0.00673727
TRINITY_DN1108_c0_g1	ras-related protein Rab-6A isoform X1	-0.217608	0.169057	0.113719	0.512628	0.331327	0.00673727
TRINITY_DN1108_c0_g1	ras-related protein Rab-6A-like isoform X1	-0.217608	0.169057	0.113719	0.512628	0.331327	0.00673727
TRINITY_DN1108_c0_g2	ras-related protein Rab-6A	-0.422283	0.353839	0.0345607	0.957286	0.456844	0.172749
TRINITY_DN11082_c0_g1	---NA---	0.124178	0.670317	0.087996	0.783383	-0.0361823	0.876662
TRINITY_DN11083_c0_g1	verrucotoxin subunit beta-like	1.17895	0.628038	-0.251506	0.945893	-1.43045	0.454768
TRINITY_DN110835_c0_g1	protein phosphatase 1 regulatory subunit 12B isoform X3	1.90472	0.0490481	0.964938	0.330973	-0.939781	0.0642227
TRINITY_DN11084_c0_g1	large neutral amino acids transporter small subunit 2 isoform X1	0.233717	0.794595	-0.15581	0.879561	-0.389527	0.50386
TRINITY_DN110849_c0_g1	ubiquitin-conjugating enzyme E2 D1 isoform X2	-0.202659	0.629571	0.260611	0.491428	0.46327	0.0781017
TRINITY_DN110866_c0_g1	translation initiation factor eIF-2B subunit delta	1.06557	0.0748365	-0.0354299	0.972196	-1.101	0.0205018
TRINITY_DN11088_c0_g1	epidermal growth factor receptor substrate 15	0.116862	0.883235	-0.25596	0.733172	-0.372822	0.441038
TRINITY_DN1109_c0_g1	tripartite motif-containing protein 15-like	0.00874091	0.985488	-0.695141	0.0396387	-0.703882	0.00913087
TRINITY_DN1109_c1_g1	hypothetical protein N312_02468, partial	-0.181763	0.848243	-1.53471	0.0567689	-1.35295	0.0373723
TRINITY_DN11090_c0_g1	WAS/WASL-interacting protein family member 3	-0.305744	0.548058	-0.600812	0.212076	-0.295068	0.448583
TRINITY_DN110900_c0_g1	SLIT-ROBO Rho GTPase-activating protein 3 isoform X2	0.330328	0.655686	0.782526	0.178555	0.452198	0.246658
TRINITY_DN110916_c0_g2	---NA---	0.449312	0.371808	-0.241036	0.693802	-0.690347	0.0626407
TRINITY_DN11093_c0_g1	---NA---	0.14489	0.729708	0.476256	0.166996	0.331366	0.201128
TRINITY_DN11093_c1_g1	---NA---	-0.168225	0.532537	-0.132147	0.641862	0.0360774	0.874738
TRINITY_DN11093_c2_g1	---NA---	-0.0491176	0.935913	0.47921	0.225345	0.528327	0.057594
TRINITY_DN11094_c0_g1	leukotriene C4 synthase-like	1.03889	0.286952	0.510542	0.644159	-0.528348	0.431372
TRINITY_DN11095_c0_g1	reverse hypothetical protein	0.141168	0.838052	-0.0849373	0.913417	-0.226105	0.618435
TRINITY_DN11095_c2_g1	killer cell lectin-like receptor subfamily F member 1	0.0539445	0.946482	-0.507534	0.454917	-0.561478	0.265128
TRINITY_DN11096_c0_g1	rho GTPase-activating protein 6	0.143936	0.700435	0.382936	0.225673	0.239	0.313807
TRINITY_DN11096_c0_g3	---NA---	1.093	0.627358	1.35907	0.485286	0.266069	0.816276
TRINITY_DN11097_c0_g1	dolichyldiphosphatase 1	-0.138267	0.49643	0.0159208	0.953681	0.154188	0.288438
TRINITY_DN11097_c0_g1	---NA---	-0.138267	0.49643	0.0159208	0.953681	0.154188	0.288438
TRINITY_DN11097_c0_g3	dolichyldiphosphatase 1	-0.527497	0.234722	-0.130431	0.816592	0.397066	0.250477
TRINITY_DN11098_c1_g1	Zinc finger and SCAN domain-containing protein 29	0.147959	0.75493	-0.726017	0.0962371	-0.873976	0.0126379
TRINITY_DN11099_c0_g1	---NA---	0.209296	0.739851	-0.216434	0.743916	-0.42573	0.30955
TRINITY_DN11099_c1_g1	interferon alpha-inducible protein 27-like protein 2A isoform X1	2.97417	0.245241	-1.43374	0.784879	-4.40791	0.17528
TRINITY_DN11099_c5_g1	---NA---	-0.508229	0.283516	-0.0698678	0.909922	0.438361	0.215562
TRINITY_DN111_c0_g1	serine/arginine-rich splicing factor 5-like	-0.146614	0.282615	-0.0775328	0.615945	0.0690809	0.532641
TRINITY_DN111_c0_g2	rna-directed dna polymerase from mobile element jockey-like	-0.0775201	0.837086	-0.818259	0.00859425	-0.740739	0.00338216
TRINITY_DN111_c0_g3	protein FAM117A isoform X1	-0.311566	0.209719	-0.135338	0.639151	0.176228	0.375694
TRINITY_DN111_c0_g4	ac transposable element-derived 4	0.0696322	0.817802	0.0723083	0.813979	0.00267609	0.991826
TRINITY_DN111_c1_g1	polycystin-2 isoform X2	0.0361132	0.920579	-0.303264	0.267276	-0.339377	0.0939919
TRINITY_DN111_c1_g1	Polycystin-2	0.0361132	0.920579	-0.303264	0.267276	-0.339377	0.0939919
TRINITY_DN111_c1_g2	serine/threonine-protein phosphatase 2B catalytic subunit gamma isoform isoform X2	0.0380387	0.82323	0.0571051	0.727618	0.0190664	0.878427
TRINITY_DN111_c17_g1	hypothetical protein UY3_05797	-0.350599	0.590594	-0.304248	0.649099	0.0463511	0.93656
TRINITY_DN111_c2_g1	serine/threonine-protein phosphatase 2B catalytic subunit beta isoform isoform X2	-0.0303007	0.916582	0.397699	0.0465765	0.427999	0.00624472
TRINITY_DN111_c2_g1	serine/threonine-protein phosphatase 2B catalytic subunit beta isoform isoform X6	-0.0303007	0.916582	0.397699	0.0465765	0.427999	0.00624472
TRINITY_DN111_c3_g1	rna-directed dna polymerase from mobile element jockey-like	0.116297	0.856985	0.0484782	0.946541	-0.0678191	0.881223
TRINITY_DN111_c4_g1	rna-directed dna polymerase from mobile element jockey-like	0.502599	0.442266	0.0499945	0.957632	-0.452604	0.347886
TRINITY_DN111_c5_g1	four and a half LIM domains protein 3 isoform X1	0.229343	0.571357	0.164066	0.705474	-0.0652763	0.839235
TRINITY_DN111_c7_g1	hypothetical protein UY3_11722	-0.126363	0.770047	-1.44249	0.000435512	-1.31613	0.00011914
TRINITY_DN1110_c0_g1	cleavage stimulation factor subunit 3	-0.193283	0.236875	-0.040098	0.85536	0.153185	0.223582
TRINITY_DN1110_c0_g2	cleavage stimulation factor subunit 3-like isoform X1	-0.000326128	0.999081	-0.21138	0.311251	-0.211054	0.171217
TRINITY_DN11101_c1_g1	---NA---	0.292341	0.821549	-0.304742	0.833373	-0.597084	0.496646
TRINITY_DN11102_c0_g1	zinc finger MYM-type protein 1-like	0.476609	0.512323	0.204103	0.810621	-0.272506	0.583007
TRINITY_DN11102_c0_g2	zinc finger MYM-type protein 1-like	0.0614309	0.92585	-0.205153	0.725043	-0.266584	0.491081
TRINITY_DN11103_c0_g1	---NA---	-0.0283966	0.962438	-0.673694	0.119998	-0.645297	0.0558568
TRINITY_DN11105_c0_g1	dnaJ homolog subfamily C member 30	0.00142414	0.998414	-0.108678	0.876155	-0.110102	0.805308
TRINITY_DN11105_c0_g2	---NA---	-0.227117	0.664114	-0.185623	0.733379	0.0414934	0.922694
TRINITY_DN11105_c1_g1	zinc finger protein 251-like isoform X9	-0.565559	0.410763	-0.953205	0.2218	-0.387647	0.577625
TRINITY_DN11105_c2_g1	hypothetical protein llap_7364	0.767138	0.538809	-0.985577	0.569454	-1.75271	0.145895
TRINITY_DN11106_c0_g1	fragile X mental retardation syndrome-related protein 1 isoform X3	0.0521451	0.968571	0.813686	0.304169	0.761541	0.156811
TRINITY_DN11106_c1_g1	Zinc finger and SCAN domain-containing protein 29	0.272917	0.736374	0.265092	0.736697	-0.00782474	0.990189
TRINITY_DN111074_c0_g2	unconventional myosin-IXb isoform X2	-0.120304	0.813893	-0.174093	0.725652	-0.0537898	0.888891
TRINITY_DN11108_c0_g1	RNA-directed DNA polymerase from mobile element jockey-like	-1.30068	0.311449	-2.23667	0.160546	-0.935992	0.525792
TRINITY_DN1111_c0_g1	C-type lectin domain family 4 member F-like	0.103656	0.90576	-1.37605	0.0540005	-1.47971	0.0105487
TRINITY_DN1111_c0_g2	C-type lectin domain family 4 member F-like	0.196704	0.819591	-1.21485	0.107695	-1.41156	0.0182744
TRINITY_DN11112_c0_g1	28S ribosomal protein S9, mitochondrial	0.0534851	0.911116	0.119678	0.782833	0.066193	0.829809
TRINITY_DN11112_c3_g1	---NA---	0.317504	0.405195	0.695537	0.0439814	0.378033	0.144617
TRINITY_DN11112_c9_g1	---NA---	0.213367	0.64765	0.638399	0.0957782	0.425031	0.13652
TRINITY_DN11113_c0_g1	casein kinase II subunit alpha	-0.377313	0.574893	-0.915829	0.196968	-0.538516	0.364566
TRINITY_DN11114_c0_g1	phosphatidylinositol N-acetylglucosaminyltransferase subunit H	-0.095428	0.751582	-0.0937254	0.76264	0.00170261	0.995592
TRINITY_DN11115_c0_g2	---NA---	-0.148684	0.746544	0.630496	0.0780178	0.77918	0.00514802
TRINITY_DN11115_c0_g3	---NA---	0.312069	0.592395	0.0934823	0.898795	-0.218586	0.598456
TRINITY_DN11116_c0_g1	uncharacterized protein LOC112060788	-0.192712	0.879911	-2.80757	0.251596	-2.61485	0.216204
TRINITY_DN11117_c0_g1	---NA---	-0.0158129	0.989229	0.50914	0.521792	0.524953	0.30963
TRINITY_DN111172_c0_g1	girdin isoform X1	-1.02054	0.0362786	-1.14417	0.0300542	-0.123631	0.822476
TRINITY_DN11119_c0_g1	Zinc finger and SCAN domain-containing protein 29	-0.370999	0.640088	-0.0663199	0.947219	0.304679	0.595368
TRINITY_DN1112_c0_g1	phosphatidylinositol 4,5-bisphosphate 3-kinase catalytic subunit delta isoform	0.110612	0.73133	-0.106824	0.751615	-0.217437	0.307919
TRINITY_DN1112_c0_g3	protein FAM210A	-0.083356	0.856282	0.3543	0.316889	0.437656	0.0882008
TRINITY_DN11121_c0_g1	---NA---	0.484169	0.539267	0.222584	0.797799	-0.261585	0.577233
TRINITY_DN11124_c0_g1	WD repeat-containing protein 64-like	1.52959	0.245241	1.3982	0.245732	-0.131384	0.859441
TRINITY_DN11125_c0_g1	PREDICTED: uncharacterized protein LOC102366250	0.295572	0.471962	0.322303	0.427987	0.0267314	0.939948
TRINITY_DN111273_c0_g1	ATP-binding cassette sub-family E member 1	-0.0486654	0.942211	-0.174888	0.766912	-0.126223	0.762164
TRINITY_DN111277_c0_g1	hypothetical protein N306_12919, partial	2.16206	0.107664	0.272234	0.89839	-1.88982	0.047766
TRINITY_DN111279_c0_g1	CCR4-NOT transcription complex subunit 2 isoform X1	0.160775	0.66542	-0.0976406	0.817607	-0.258416	0.307025
TRINITY_DN11128_c0_g1	proteolipid protein 2	0.262425	0.503734	0.0528822	0.919334	-0.209543	0.463067
TRINITY_DN1113_c0_g1	DNA replication licensing factor mcm4	0.0411101	0.913906	0.112182	0.738301	0.0710717	0.767255
TRINITY_DN11130_c0_g1	Microtubule-associated protein tau	-0.217934	0.693934	-0.793285	0.10657	-0.57535	0.138579
TRINITY_DN11130_c0_g1	Hypoxia-inducible factor 1-alpha	-0.217934	0.693934	-0.793285	0.10657	-0.57535	0.138579
TRINITY_DN11132_c0_g1	zinc finger protein 345-like isoform X2	0.679327	0.107664	0.452481	0.308153	-0.226846	0.492499
TRINITY_DN11133_c0_g1	hypothetical protein N308_11923, partial	0.502382	0.328764	0.123288	0.858206	-0.379094	0.329049
TRINITY_DN11133_c0_g2	ORF2	0.0170375	0.976481	-0.266059	0.550668	-0.283097	0.371561
TRINITY_DN11135_c0_g1	protein ANTAGONIST OF LIKE HETEROCHROMATIN PROTEIN 1-like	0.276901	0.512992	-0.967456	0.0211405	-1.24436	0.000412904
TRINITY_DN11136_c0_g1	olfactory receptor 52D1-like	-0.718589	0.154159	-1.79398	0.00834389	-1.07539	0.0637026
TRINITY_DN11138_c0_g1	---NA---	0.173448	0.795473	-0.521298	0.387466	-0.694746	0.110614
TRINITY_DN11139_c2_g1	annexin A10	0.475658	0.404362	0.163238	0.817538	-0.31242	0.456487
TRINITY_DN111393_c0_g1	---NA---	0.462139	0.512148	-0.245269	0.790551	-0.707408	0.184369
TRINITY_DN1114_c0_g1	WD repeat-containing protein 75	-0.0801382	0.662158	0.115733	0.50445	0.195871	0.102871
TRINITY_DN1114_c1_g1	---NA---	-0.0652281	0.927549	-0.796906	0.135441	-0.731678	0.0776559
TRINITY_DN1114_c1_g2	---NA---	0.758302	0.143436	-1.04928	0.0669755	-1.80759	0.000157577
TRINITY_DN1114_c1_g3	butyrophilin subfamily 1 member A1-like	-0.175234	0.668343	-0.854022	0.0197187	-0.678788	0.0200845
TRINITY_DN1114_c2_g1	zinc finger protein 629-like	-0.357461	0.582137	-0.921334	0.132206	-0.563872	0.2541
TRINITY_DN1114_c4_g1	glutaredoxin-related protein 5, mitochondrial	-0.0586351	0.847566	0.16347	0.528648	0.222105	0.219076
TRINITY_DN1114_c4_g2	---NA---	0.909233	0.086706	0.138058	0.85373	-0.771175	0.049614
TRINITY_DN11140_c0_g1	cAMP-responsive element-binding protein-like 2 isoform X2	0.073636	0.812872	0.129907	0.649099	0.0562713	0.79664
TRINITY_DN11143_c0_g1	---NA---	-0.078865	0.919734	-0.125814	0.872869	-0.0469487	0.930975
TRINITY_DN11144_c2_g1	Zinc finger and SCAN domain-containing protein 29	0.375432	0.53391	0.444699	0.427686	0.0692673	0.869768
TRINITY_DN11145_c0_g1	---NA---	1.25037	0.225367	0.958158	0.327785	-0.29221	0.595204
TRINITY_DN11146_c0_g4	carnitine O-palmitoyltransferase 2, mitochondrial isoform X2	-0.151764	0.794891	0.192947	0.725596	0.344711	0.330842
TRINITY_DN11146_c1_g1	cell cycle checkpoint protein RAD17	0.287328	0.653938	0.163325	0.814891	-0.124003	0.778149
TRINITY_DN11146_c3_g2	E3 SUMO-protein ligase KIAA1586-like	0.134055	0.771746	0.457261	0.216424	0.323206	0.23939
TRINITY_DN111460_c0_g1	---NA---	-0.364222	0.666564	-0.38246	0.639039	-0.0182384	0.979903
TRINITY_DN11147_c0_g1	Zinc finger protein 692	0.239512	0.494012	-0.0116299	0.981448	-0.251142	0.322069
TRINITY_DN11148_c0_g1	---NA---	0.29478	0.525314	0.516772	0.211832	0.221992	0.477285
TRINITY_DN11149_c0_g1	60S ribosomal protein L3-like	-0.098192	0.786924	0.195442	0.539779	0.293634	0.179682
TRINITY_DN111498_c0_g1	probable ATP-dependent RNA helicase DDX28	-0.10585	0.79002	0.0392055	0.931743	0.145055	0.575853
TRINITY_DN1115_c0_g1	chemokine-like factor	0.0492373	0.847276	0.186047	0.365486	0.13681	0.370055
TRINITY_DN11150_c0_g1	Zinc finger and SCAN domain-containing protein 29	0.00254639	0.997163	-0.230071	0.737596	-0.232617	0.619822
TRINITY_DN11152_c0_g1	---NA---	0.177097	0.83206	-1.09413	0.233134	-1.27123	0.0775004
TRINITY_DN11153_c0_g2	CDK5 and ABL1 enzyme substrate 1	0.478341	0.440704	-0.0524366	0.952366	-0.530778	0.227342
TRINITY_DN11154_c0_g1	---NA---	0.26092	0.659239	0.34482	0.534281	0.0839008	0.85061
TRINITY_DN111546_c0_g1	transmembrane protein 53-A-like	0.216962	0.685193	-0.584213	0.239654	-0.801176	0.0308973
TRINITY_DN111546_c0_g2	inosine-5'-monophosphate dehydrogenase 1 isoform X2	-0.348986	0.487979	-0.0601042	0.928001	0.288882	0.438465
TRINITY_DN11155_c0_g1	hypothetical protein UY3_14134	0.0743524	0.901995	0.0149033	0.982494	-0.0594491	0.885779
TRINITY_DN11155_c0_g1	putative malate dehydrogenase 1B	0.0743524	0.901995	0.0149033	0.982494	-0.0594491	0.885779
TRINITY_DN11156_c0_g1	hypothetical protein UY3_18302	-0.252489	0.776631	0.481671	0.505539	0.73416	0.139478
TRINITY_DN11156_c0_g2	RAF proto-oncogene serine/threonine-protein kinase isoform X1	0.168425	0.767424	0.610756	0.149111	0.442331	0.137792
TRINITY_DN11157_c0_g1	zinc finger protein OZF-like isoform X3	-0.490693	0.285528	-0.5554	0.253034	-0.0647063	0.891206
TRINITY_DN11157_c0_g3	zinc finger protein OZF-like isoform X3	-0.22398	0.522701	-0.0896755	0.830465	0.134305	0.617355
TRINITY_DN11159_c3_g1	---NA---	-0.160218	0.79002	-1.35496	0.0283238	-1.19474	0.021977
TRINITY_DN111599_c0_g1	---NA---	0.615416	0.374945	-0.190871	0.835031	-0.806287	0.104606
TRINITY_DN1116_c0_g1	death domain-associated protein 6	-0.112058	0.749614	-0.789002	0.00949931	-0.676944	0.00562984
TRINITY_DN1116_c0_g1	death domain-associated protein 6 isoform X1	-0.112058	0.749614	-0.789002	0.00949931	-0.676944	0.00562984
TRINITY_DN1116_c0_g1	---NA---	-0.112058	0.749614	-0.789002	0.00949931	-0.676944	0.00562984
TRINITY_DN11160_c0_g1	NACHT and WD repeat domain-containing protein 2-like isoform X3	1.31329	0.315746	2.2234	0.0355955	0.910115	0.057787
TRINITY_DN11162_c0_g1	biorientation of chromosomes in cell division protein 1	0.158646	0.662758	0.132408	0.730645	-0.0262386	0.929348
TRINITY_DN11162_c2_g1	---NA---	-0.0136142	0.97174	-0.123179	0.686794	-0.109565	0.609401
TRINITY_DN111626_c1_g1	hypothetical protein UY3_12368	0.66341	0.257903	-0.0250065	0.978054	-0.688416	0.12241
TRINITY_DN11164_c0_g1	syntaxin-binding protein 5-like	1.15317	0.0727458	1.03592	0.101635	-0.117248	0.827015
TRINITY_DN11165_c0_g1	carcinoembryonic antigen-related cell adhesion molecule 19	0.0558362	0.941381	-0.727129	0.19818	-0.782966	0.0697341
TRINITY_DN11166_c0_g1	---NA---	-0.0881342	0.843874	-0.456199	0.207181	-0.368064	0.184404
TRINITY_DN11167_c0_g1	probable fibrosin-1	0.173265	0.625056	-0.290068	0.393949	-0.463333	0.0556822
TRINITY_DN11167_c2_g1	hypothetical protein Z169_16292, partial	0.124512	0.891513	0.503967	0.468939	0.379455	0.430371
TRINITY_DN11168_c0_g1	polyadenylate-binding protein 1	0.113373	0.798497	0.337515	0.355104	0.224142	0.40976
TRINITY_DN11169_c0_g1	---NA---	0.855753	0.456365	1.08074	0.287054	0.22499	0.739907
TRINITY_DN11169_c0_g2	---NA---	0.44792	0.599284	0.0167827	0.988915	-0.431138	0.474516
TRINITY_DN11169_c1_g1	plexin-D1	-1.18759	0.101419	-0.0493783	0.962223	1.13821	0.0424857
TRINITY_DN1117_c0_g1	CMRF35-like molecule 6	-0.0401814	0.950035	-0.333877	0.496047	-0.293695	0.415737
[truncated: 38,235 more rows]
